# Supplementary material for: A dynamic charge-charge interaction modulates PP2A:B56 substrate recruitment
Source: eLife. 2020 Mar 20;9:e55966. doi: 10.7554/eLife.55966 (PMC7108865; doi:10.7554/eLife.55966)
Supplement: Figure 1—source data 1. [file elife-55966-fig1-data1.xlsx]

## Sheet: description
Column	B56	SLIM
column A	protein name	protein name
column B	uniprot accession	uniprot accession
column C	protein description	protein description
column D	ratio log2 B56AWT-B56A2R	ratio log2 B56AWT-B56A2R
column E	ratio log2 B56GWT-B56G2R	ratio log2 B56GWT-B56G2R
column F	p-value B56AWT-B56A2R	p-value B56AWT-B56A2R
column G	p-value log2 B56GWT-B56G2R	p-value log2 B56GWT-B56G2R
column H	SLIM identified in Hertz et al	q-value B56AWT-B56A2R
column I	SLIM identified in Wang et al	q-value log2 B56GWT-B56G2R
column J	maximum xcorr parameter for protein identidication	maximum xcorr parameter for protein identidication
column K	maximum dcn parameter for protein identidication	maximum dcn parameter for protein identidication
column L	minimum part per million parameter for protein identidication	minimum part per million parameter for protein identidication
column M	total peptides [B56AWT_1]	total peptides [B56AWT_1]
column N	unique peptides [B56AWT_1]	unique peptides [B56AWT_1]
column O	unique matches [B56AWT_1]	unique matches [B56AWT_1]
column P	total peptides [B56AWT_2]	total peptides [B56AWT_2]
column Q	unique peptides [B56AWT_2]	unique peptides [B56AWT_2]
column R	unique matches [B56AWT_2]	unique matches [B56AWT_2]
column S	total peptides [B56AWT_3]	total peptides [B56AWT_3]
column T	unique peptides [B56AWT_3]	unique peptides [B56AWT_3]
column U	unique matches [B56AWT_3]	unique matches [B56AWT_3]
column V	total peptides [B56A2R_1]	total peptides [B56A2R_1]
column W	unique peptides [B56A2R_1]	unique peptides [B56A2R_1]
column X	unique matches [B56A2R_1]	unique matches [B56A2R_1]
column Y	total peptides [B56A2R_2]	total peptides [B56A2R_2]
column Z	unique peptides [B56A2R_2]	unique peptides [B56A2R_2]
column AA	unique matches [B56A2R_2]	unique matches [B56A2R_2]
column AB	total peptides [B56A2R_3]	total peptides [B56A2R_3]
column AC	unique peptides [B56A2R_3]	unique peptides [B56A2R_3]
column AD	unique matches [B56A2R_3]	unique matches [B56A2R_3]
column AE	total peptides [B56GWT_1]	total peptides [B56GWT_1]
column AF	unique peptides [B56GWT_1]	unique peptides [B56GWT_1]
column AG	unique matches [B56GWT_1]	unique matches [B56GWT_1]
column AH	total peptides [B56GWT_2]	total peptides [B56GWT_2]
column AI	unique peptides [B56GWT_2]	unique peptides [B56GWT_2]
column AJ	unique matches [B56GWT_2]	unique matches [B56GWT_2]
column AK	total peptides [B56GWT_3]	total peptides [B56GWT_3]
column AL	unique peptides [B56GWT_3]	unique peptides [B56GWT_3]
column AM	unique matches [B56GWT_3]	unique matches [B56GWT_3]
column AN	total peptides [B56G2R_1]	total peptides [B56G2R_1]
column AO	unique peptides [B56G2R_1]	unique peptides [B56G2R_1]
column AP	unique matches [B56G2R_1]	unique matches [B56G2R_1]
column AQ	total peptides [B56G2R_2]	total peptides [B56G2R_2]
column AR	unique peptides [B56G2R_2]	unique peptides [B56G2R_2]
column AS	unique matches [B56G2R_2]	unique matches [B56G2R_2]
column AT	total peptides [B56G2R_3]	total peptides [B56G2R_3]
column AU	unique peptides [B56G2R_3]	unique peptides [B56G2R_3]
column AV	unique matches [B56G2R_3]	unique matches [B56G2R_3]
column AW	log2 ibaq_B56AWT_1	log2 ibaq_B56AWT_1
column AX	log2 ibaq_B56AWT_2	log2 ibaq_B56AWT_2
column AY	log2 ibaq_B56AWT_3	log2 ibaq_B56AWT_3
column AZ	log2 ibaq_B56A2R_1	log2 ibaq_B56A2R_1
column BA	log2 ibaq_B56A2R_2	log2 ibaq_B56A2R_2
column BB	log2 ibaq_B56A2R_3	log2 ibaq_B56A2R_3
column BC	log2 ibaq_B56GWT_1	log2 ibaq_B56GWT_1
column BD	log2 ibaq_B56GWT_2	log2 ibaq_B56GWT_2
column BE	log2 ibaq_B56GWT_3	log2 ibaq_B56GWT_3
column BF	log2 ibaq_B56G2R_1	log2 ibaq_B56G2R_1
column BG	log2 ibaq_B56G2R_2	log2 ibaq_B56G2R_2
column BH	log2 ibaq_B56G2R_3	log2 ibaq_B56G2R_3

## Sheet: B56
ref	accession	description	ratio log2 B56AWT-B56A2R	ratio log2 B56GWT-B56G2R	p-value B56AWT-B56A2R	p-value log2 B56GWT-B56G2R	Hertz et al.	Wang et al.	xcorr_max	dcn_max	ppm_min	tp[B56AWT_1]	up[B56AWT_1]	um[B56AWT_1]	tp[B56AWT_2]	up[B56AWT_2]	um[B56AWT_2]	tp[B56AWT_3]	up[B56AWT_3]	um[B56AWT_3]	tp[B56A2R_1]	up[B56A2R_1]	um[B56A2R_1]	tp[B56A2R_2]	up[B56A2R_2]	um[B56A2R_2]	tp[B56A2R_3]	up[B56A2R_3]	um[B56A2R_3]	tp[B56GWT_1]	up[B56GWT_1]	um[B56GWT_1]	tp[B56GWT_2]	up[B56GWT_2]	um[B56GWT_2]	tp[B56GWT_3]	up[B56GWT_3]	um[B56GWT_3]	tp[B56G2R_1]	up[B56G2R_1]	um[B56G2R_1]	tp[B56G2R_2]	up[B56G2R_2]	um[B56G2R_2]	tp[B56G2R_3]	up[B56G2R_3]	um[B56G2R_3]	log2 ibaq_B56AWT_1	log2 ibaq_B56AWT_2
2A5A_HUMAN	Q15172	Serine/threonine-protein phosphatase 2A 56 kDa regulatory subunit alpha isoform OS=Homo sapiens GN=PPP2R5A PE=1 SV=1	0	-1.06	1	0.0394745			4.55	0.75	0.00245	127	27	24	56	20	17	92	25	21	109	26	22	130	25	22	57	23	20	1	1	0	1	1	0	1	1	0	3	2	1	1	1	0	1	1	1	30.66	30.66
2A5G_HUMAN	Q13362	Serine/threonine-protein phosphatase 2A 56 kDa regulatory subunit gamma isoform OS=Homo sapiens GN=PPP2R5C PE=1 SV=3	0.0400003	0	0.789049	1			6.51	0.84	0.002456	1	1	0	1	1	0	1	1	0	1	1	0	1	1	0	1	1	0	131	35	26	150	40	32	170	43	35	117	30	21	143	36	28	68	26	21	19.64	19.9
BUB1B_HUMAN	O60566	Mitotic checkpoint serine/threonine-protein kinase BUB1 beta OS=Homo sapiens GN=BUB1B PE=1 SV=3	3.05333	-0.106667	0.0263787	0.799751	O60566	O60566	4.44	0.69	0.003319	20	17	17	3	3	3	10	9	9	9	9	9	6	6	6	1	1	1	12	12	12	7	7	7	16	16	16	9	9	9	11	11	11	4	4	4	22.28	21.05
KIF4A_HUMAN	O95239	Chromosome-associated kinesin KIF4A OS=Homo sapiens GN=KIF4A PE=1 SV=3	3.56667	3.46	0.0085011	0.00125517	O95239	O95239	4.58	0.76	0.001604	62	38	23	13	13	8	30	25	16	8	8	5	12	12	6	9	9	6	74	47	29	56	41	24	68	45	28	16	16	6	18	16	9	11	11	7	23.42	23.19
2AAA_HUMAN	P30153	Serine/threonine-protein phosphatase 2A 65 kDa regulatory subunit A alpha isoform OS=Homo sapiens GN=PPP2R1A PE=1 SV=4	0.193333	-0.813335	0.0139752	0.0078018			6.47	0.82	0.000445	120	33	26	50	23	20	88	26	22	106	29	25	122	31	25	48	22	20	119	35	30	137	36	30	221	38	32	133	32	27	182	39	32	96	26	23	29.28	29.4
KIF4B_HUMAN	Q2VIQ3	Chromosome-associated kinesin KIF4B OS=Homo sapiens GN=KIF4B PE=1 SV=2	3.54333	3.63	0.00791726	0.00024051	Q2VIQ3	Q2VIQ3	4.24	0.76	0.001604	26	15	0	5	5	0	9	9	0	3	3	0	6	6	0	3	3	0	31	18	0	22	17	0	25	17	0	10	10	0	8	7	0	4	4	0	22.14	22.19
CYFP1_HUMAN	Q7L576	Cytoplasmic FMR1-interacting protein 1 OS=Homo sapiens GN=CYFIP1 PE=1 SV=1	3.09333	3.26333	0.012015	0.00599911			4.44	0.71	0.013561	29	23	13	5	5	1	15	15	6	9	9	5	6	6	5	6	6	4	27	24	15	22	22	11	33	27	14	9	9	5	9	9	6	1	1	1	22.55	21.69
KIF3A_HUMAN	Q9Y496	Kinesin-like protein KIF3A OS=Homo sapiens GN=KIF3A PE=1 SV=4	4.86758	4.4937	0.000629934	0.0116596			2.94	0.59	0.0311	2	1	0	1	1	0	1	1	0	0	0	0	1	1	0	0	0	0	3	1	0	2	1	0	2	1	0	1	1	0	1	1	0	0	0	0	20	20.85
KIF6_HUMAN	Q6ZMV9	Kinesin-like protein KIF6 OS=Homo sapiens GN=KIF6 PE=1 SV=3	4.66064	4.65517	0.000610876	0.0168071			2.94	0.59	0.0311	2	1	0	1	1	0	1	1	0	0	0	0	1	1	0	0	0	0	3	1	0	2	1	0	2	1	0	1	1	0	1	1	0	0	0	0	19.78	20.64
NHS_HUMAN	Q6T4R5	Nance-Horan syndrome protein OS=Homo sapiens GN=NHS PE=1 SV=1	4.80462	7.63129	0.00133116	8.40357e-07	Q6T4R5	Q6T4R5	4.49	0.76	0.004271	30	22	22	11	10	10	23	17	17	0	0	0	0	0	0	0	0	0	21	19	19	17	15	15	21	19	19	0	0	0	0	0	0	0	0	0	20.68	21.07
PP2AA_HUMAN	P67775	Serine/threonine-protein phosphatase 2A catalytic subunit alpha isoform OS=Homo sapiens GN=PPP2CA PE=1 SV=1	0.403334	-1.37333	0.264816	0.0333751			4.44	0.78	0.002521	38	12	2	20	9	0	36	10	0	30	10	0	37	11	1	24	9	0	41	16	1	51	14	1	54	14	1	44	15	2	62	15	2	14	7	0	28.58	29.21
PP2AB_HUMAN	P62714	Serine/threonine-protein phosphatase 2A catalytic subunit beta isoform OS=Homo sapiens GN=PPP2CB PE=1 SV=1	0.403334	-1.37333	0.264816	0.0344316			4.44	0.78	0.002521	37	11	1	20	9	0	36	10	0	31	11	1	37	11	1	24	9	0	41	16	1	50	13	0	53	14	1	42	13	0	59	13	0	14	7	0	28.58	29.21
VIME_HUMAN	P08670	Vimentin OS=Homo sapiens GN=VIM PE=1 SV=4	0.106665	-1.51	0.931376	0.00900171			8.83	0.84	0.000223	176	63	53	174	64	53	227	66	56	185	55	47	188	57	49	199	65	54	81	38	33	88	52	45	98	49	40	87	45	38	128	53	45	70	41	34	29.34	32.19
FBX22_HUMAN	Q8NEZ5	F-box only protein 22 OS=Homo sapiens GN=FBXO22 PE=1 SV=1	-0.156667	-0.893334	0.15692	0.0375884			5.42	0.8	0.005895	25	15	15	9	7	7	23	12	12	29	14	14	27	13	13	10	9	9	29	17	17	32	18	17	32	18	18	25	16	15	36	19	18	15	13	13	26.07	25.8
PPAC_HUMAN	P24666	Low molecular weight phosphotyrosine protein phosphatase OS=Homo sapiens GN=ACP1 PE=1 SV=3	0.356667	-1.42667	0.66773	0.0187552			4.49	0.79	0.006475	15	8	8	5	5	5	13	7	7	14	8	8	9	6	6	9	6	6	21	9	9	19	9	9	22	9	9	21	9	9	20	9	9	7	5	5	24.62	26.07
PIMT_HUMAN	P22061	Protein-L-isoaspartate(D-aspartate) O-methyltransferase OS=Homo sapiens GN=PCMT1 PE=1 SV=4	0.226667	-1.03333	0.734202	0.0286824			4.48	0.78	0.001153	15	11	11	7	7	7	11	7	7	10	7	7	13	8	8	10	8	8	13	8	8	21	12	12	21	11	11	19	11	11	21	12	12	8	7	7	24.68	25.94
IF2G_HUMAN	P41091	Eukaryotic translation initiation factor 2 subunit 3 OS=Homo sapiens GN=EIF2S3 PE=1 SV=3	-0.176666	-0.833333	0.859885	0.0313988			5.11	0.74	0.002209	14	11	1	11	9	1	14	10	1	15	11	1	15	10	1	14	11	1	15	10	1	21	14	1	18	11	1	20	11	1	25	14	1	10	8	1	24.18	25.79
DESM_HUMAN	P17661	Desmin OS=Homo sapiens GN=DES PE=1 SV=3	-0.116667	-1.84	0.918219	0.017433			4.68	0.65	0.001452	13	6	0	13	5	0	19	5	0	18	5	0	20	5	0	19	6	0	6	3	0	8	5	0	11	6	0	8	5	0	10	5	0	6	4	0	26.15	28.52
IF2GL_HUMAN	Q2VIR3	Putative eukaryotic translation initiation factor 2 subunit 3-like protein OS=Homo sapiens GN=EIF2S3L PE=5 SV=2	-0.103334	-0.816667	0.921035	0.03268			5.11	0.74	0.002209	12	10	0	10	8	0	12	9	0	13	10	0	12	9	0	12	10	0	12	9	0	18	13	0	15	10	0	17	10	0	22	13	0	9	7	0	23.89	25.79
IMA2_HUMAN	P52292	Importin subunit alpha-2 OS=Homo sapiens GN=KPNA2 PE=1 SV=1	0.67	0.863333	0.585395	0.0428072			4.76	0.74	0.004823	10	6	6	12	9	8	9	8	7	8	6	6	10	8	8	12	9	8	21	11	11	24	12	11	35	13	12	13	9	9	19	10	9	10	7	7	23.39	26.19
FBX3_HUMAN	Q9UK99	F-box only protein 3 OS=Homo sapiens GN=FBXO3 PE=1 SV=3	-0.493333	-0.966667	0.121104	0.0401415			4.66	0.79	0.006223	17	13	13	5	5	5	11	9	9	18	13	13	20	13	13	7	7	7	20	14	14	28	20	20	26	18	18	22	16	16	30	20	20	13	12	12	23.71	23.54
IF2B_HUMAN	P20042	Eukaryotic translation initiation factor 2 subunit 2 OS=Homo sapiens GN=EIF2S2 PE=1 SV=2	-0.0833333	-0.77	0.929756	0.0161376			5.32	0.79	0.003257	13	11	11	7	6	6	10	8	8	11	11	11	8	7	7	7	7	7	20	15	15	26	18	18	27	18	18	21	18	18	26	17	17	10	8	8	23.21	24.62
PROF2_HUMAN	P35080	Profilin-2 OS=Homo sapiens GN=PFN2 PE=1 SV=3	-0.126667	-1.14333	0.765419	0.0256548			3.06	0.65	0.013871	6	4	4	2	2	2	5	3	3	3	2	2	2	2	2	2	2	2	4	3	3	5	3	3	5	3	3	4	3	3	6	4	4	2	2	2	23	23.43
RBBP7_HUMAN	Q16576	Histone-binding protein RBBP7 OS=Homo sapiens GN=RBBP7 PE=1 SV=1	0.373333	-0.766666	0.718839	0.0486936			7.33	0.73	0.000663	7	6	1	4	4	1	7	5	2	5	4	1	5	3	0	5	4	1	12	9	3	11	9	3	13	9	3	13	9	3	13	9	3	8	7	2	23.21	24.93
LIPA2_HUMAN	O75334	Liprin-alpha-2 OS=Homo sapiens GN=PPFIA2 PE=1 SV=2	-1.08941	1.16	0.144882	0.000350675	O75334		4.73	0.74	0.010333	2	2	0	0	0	0	1	1	0	2	2	0	2	2	0	1	1	0	40	15	0	41	15	0	41	15	0	24	10	0	29	10	0	14	7	0	16.19	14.7218
PERI_HUMAN	P41219	Peripherin OS=Homo sapiens GN=PRPH PE=1 SV=2	0.15	-1.59	0.909115	0.0082641			4.27	0.61	0.008097	14	5	0	21	7	0	28	6	0	17	5	0	21	5	0	22	6	0	3	2	0	6	4	0	6	5	0	6	4	0	9	5	0	4	4	0	24.89	27.98
ILEU_HUMAN	P30740	Leukocyte elastase inhibitor OS=Homo sapiens GN=SERPINB1 PE=1 SV=1	0.666667	-1.11333	0.260701	0.0152438			4.73	0.73	0.000295	10	8	8	3	3	3	10	8	8	5	5	5	5	5	5	2	2	2	10	8	8	13	12	12	13	11	11	15	11	11	16	13	13	6	6	6	21.72	21.49
LIPA3_HUMAN	O75145	Liprin-alpha-3 OS=Homo sapiens GN=PPFIA3 PE=1 SV=3	-0.882533	1.05	0.205724	0.0102718			6.06	0.71	0.019707	1	1	0	0	0	0	0	0	0	1	1	0	0	0	0	0	0	0	19	10	4	20	8	1	23	11	3	8	4	0	13	6	1	6	3	0	15.89	14.6562
IMB1_HUMAN	Q14974	Importin subunit beta-1 OS=Homo sapiens GN=KPNB1 PE=1 SV=2	0.376666	2.43667	0.746873	0.000409626			4.92	0.74	0.005226	19	13	13	18	16	16	19	16	16	16	13	13	18	15	15	20	16	16	48	23	23	48	25	25	52	25	25	17	12	12	25	16	16	11	10	10	23.06	25.48
LIPB1_HUMAN	Q86W92	Liprin-beta-1 OS=Homo sapiens GN=PPFIBP1 PE=1 SV=2	0.37174	-1.00333	0.654132	0.0162413			4.11	0.75	0.000545	0	0	0	0	0	0	0	0	0	0	0	0	0	0	0	1	1	1	24	19	16	20	18	16	35	25	21	31	24	21	33	25	21	17	15	14	15.3892	17.1597
SGOL1_HUMAN	Q5FBB7	Shugoshin-like 1 OS=Homo sapiens GN=SGOL1 PE=1 SV=1	-0.813333	-1.14667	0.394166	0.0340018			3.32	0.7	0.000726	16	10	10	1	1	1	7	5	5	13	8	8	13	8	8	4	4	4	15	8	8	17	10	10	18	10	10	20	11	11	24	11	11	11	8	8	22.04	19.45
CBR3_HUMAN	O75828	Carbonyl reductase [NADPH] 3 OS=Homo sapiens GN=CBR3 PE=1 SV=3	0.686666	-1.48333	0.467384	0.0363528			3.91	0.79	0.01112	4	3	1	2	2	0	2	2	0	3	2	0	4	3	1	2	2	0	5	3	1	5	3	1	4	3	1	4	3	1	5	3	1	2	2	1	20.71	22.05
PRS6B_HUMAN	P43686	26S protease regulatory subunit 6B OS=Homo sapiens GN=PSMC4 PE=1 SV=2	-0.29	-1.07333	0.76116	0.00208458			4.33	0.71	0.024148	4	4	4	3	3	3	5	5	5	3	3	3	4	4	4	5	5	5	9	9	9	9	9	9	11	11	11	10	9	9	13	13	13	4	4	4	19.64	21.37
GLO2_HUMAN	Q16775	Hydroxyacylglutathione hydrolase, mitochondrial OS=Homo sapiens GN=HAGH PE=1 SV=2	0.683334	-1.02	0.487505	0.0226876			3.88	0.7	0.0754	5	5	5	3	3	3	4	4	4	4	4	4	4	4	4	3	3	3	7	6	6	9	6	6	9	7	7	7	7	7	8	6	6	2	2	2	20.28	22.42
PSMD3_HUMAN	O43242	26S proteasome non-ATPase regulatory subunit 3 OS=Homo sapiens GN=PSMD3 PE=1 SV=2	-0.0866661	-0.706666	0.939037	0.0158728			4.24	0.72	0.00029	7	7	7	5	5	5	9	9	9	5	5	5	9	8	8	8	8	8	17	15	15	19	18	18	22	19	19	14	13	13	19	16	16	8	8	8	20.12	22.5
PRS6A_HUMAN	P17980	26S protease regulatory subunit 6A OS=Homo sapiens GN=PSMC3 PE=1 SV=3	-0.196667	-0.950001	0.862174	0.00749037			4.05	0.72	0.005444	6	6	6	2	2	2	2	2	2	4	4	4	4	4	4	6	5	5	8	8	8	8	8	8	11	10	10	8	8	8	12	12	12	4	4	4	20.64	22.55
PCBP4_HUMAN	P57723	Poly(rC)-binding protein 4 OS=Homo sapiens GN=PCBP4 PE=2 SV=1	-1.62629	-1.32667	0.506557	0.0485718			1.81	0.38	0.043142	0	0	0	0	0	0	0	0	0	0	0	0	0	0	0	1	1	0	2	1	0	2	1	0	2	1	0	2	1	0	1	1	0	1	1	0	15.5797	15.1127
PPME1_HUMAN	Q9Y570	Protein phosphatase methylesterase 1 OS=Homo sapiens GN=PPME1 PE=1 SV=3	-0.907952	-0.703333	0.560765	0.00301966			3.67	0.73	0.014616	2	2	2	0	0	0	2	2	2	1	1	1	2	2	2	1	1	1	6	5	5	6	4	4	9	7	7	6	6	6	7	5	5	2	2	2	18.59	15.1662
KCC2G_HUMAN	Q13555	Calcium/calmodulin-dependent protein kinase type II subunit gamma OS=Homo sapiens GN=CAMK2G PE=1 SV=3	0.797008	-1.06667	0.453025	0.0220491			3.74	0.74	0.009979	3	3	1	0	0	0	0	0	0	2	2	0	1	1	0	0	0	0	5	4	1	5	4	1	6	5	1	5	4	1	10	9	3	2	2	0	18.43	16.4256
ACTZ_HUMAN	P61163	Alpha-centractin OS=Homo sapiens GN=ACTR1A PE=1 SV=1	-0.668795	-0.963334	0.727493	0.0304018			3.85	0.69	0.072136	0	0	0	1	1	0	1	1	1	2	2	1	0	0	0	2	2	2	3	3	1	2	2	0	2	2	0	2	2	0	2	2	0	2	2	0	15.8241	20.11
ACTY_HUMAN	P42025	Beta-centractin OS=Homo sapiens GN=ACTR1B PE=1 SV=1	-0.22137	-1.01333	0.920828	0.026121			2.41	0.63	0.072136	0	0	0	1	1	0	0	0	0	1	1	0	0	0	0	0	0	0	2	2	0	2	2	0	2	2	0	2	2	0	2	2	0	2	2	0	15.6795	20.11
ERO1A_HUMAN	Q96HE7	ERO1-like protein alpha OS=Homo sapiens GN=ERO1L PE=1 SV=2	1.64644	-1.2	0.213786	0.0156617			3.81	0.68	0.001261	3	3	3	0	0	0	1	1	1	2	2	2	0	0	0	0	0	0	4	4	4	6	6	6	7	7	7	6	6	6	8	8	8	3	3	3	18.56	16.2473
KCC2B_HUMAN	Q13554	Calcium/calmodulin-dependent protein kinase type II subunit beta OS=Homo sapiens GN=CAMK2B PE=1 SV=3	0.821329	-1.01667	0.496438	0.0216533			3.15	0.68	0.009979	2	2	0	0	0	0	0	0	0	2	2	0	1	1	0	0	0	0	4	3	0	4	3	0	4	3	0	4	3	0	6	5	0	2	2	0	17.96	16.0249
VASP_HUMAN	P50552	Vasodilator-stimulated phosphoprotein OS=Homo sapiens GN=VASP PE=1 SV=3	1.72101	-1.79	0.145763	0.0100385			3.64	0.58	0.028571	0	0	0	1	1	1	1	1	1	0	0	0	0	0	0	0	0	0	1	1	1	2	2	2	4	3	3	3	3	3	5	5	5	2	2	2	16.3106	19.17
NMT2_HUMAN	O60551	Glycylpeptide N-tetradecanoyltransferase 2 OS=Homo sapiens GN=NMT2 PE=1 SV=1	-1.32	-0.96	0.580398	0.0102228			2.69	0.69	0.046097	1	1	0	1	1	0	1	1	0	2	2	0	1	1	0	2	2	0	1	1	0	1	1	0	2	1	0	1	1	0	1	1	0	1	1	0	19.62	18.3
YETS4_HUMAN	O95619	YEATS domain-containing protein 4 OS=Homo sapiens GN=YEATS4 PE=1 SV=1	-0.616667	-3.25568	0.0124601	0.0459054			3.41	0.7	0.013632	3	3	3	1	1	1	3	3	3	3	3	3	4	4	4	1	1	1	0	0	0	2	2	2	4	4	4	2	2	2	2	2	2	1	1	1	19.74	20.07
KCC2A_HUMAN	Q9UQM7	Calcium/calmodulin-dependent protein kinase type II subunit alpha OS=Homo sapiens GN=CAMK2A PE=1 SV=2	0.443602	-0.893333	0.727828	0.0311851			3.15	0.68	0.009979	1	1	0	0	0	0	0	0	0	1	1	0	0	0	0	0	0	0	3	2	0	3	2	0	4	3	0	3	2	0	5	4	0	1	1	0	17.8	16.9122
ELOB_HUMAN	Q15370	Transcription elongation factor B polypeptide 2 OS=Homo sapiens GN=TCEB2 PE=1 SV=1	0.226667	-5.41138	0.844924	0.0201292			3.57	0.63	0.036114	3	2	2	3	2	2	3	2	2	4	3	3	3	2	2	3	2	2	0	0	0	1	1	1	1	1	1	3	2	2	3	2	2	1	1	1	22.39	24.79
PAK2_HUMAN	Q13177	Serine/threonine-protein kinase PAK 2 OS=Homo sapiens GN=PAK2 PE=1 SV=3	-1.28745	-1.59	0.295078	0.023777	Q13177		2.84	0.65	0.034895	1	1	0	0	0	0	0	0	0	1	1	0	1	1	1	0	0	0	3	3	1	3	3	2	7	5	4	3	3	1	4	4	2	2	2	1	17.57	13.918
IMDH1_HUMAN	P20839	Inosine-5'-monophosphate dehydrogenase 1 OS=Homo sapiens GN=IMPDH1 PE=1 SV=2	-0.0208975	-1.75	0.992667	0.0294134			2.76	0.54	0.005532	0	0	0	1	1	1	1	1	1	0	0	0	0	0	0	1	1	1	2	2	2	3	3	2	2	2	1	4	4	3	3	3	2	1	1	0	14.6997	18.91
CSN4_HUMAN	Q9BT78	COP9 signalosome complex subunit 4 OS=Homo sapiens GN=COPS4 PE=1 SV=1	-0.466993	-1.02333	0.741155	0.00869011			2.6	0.63	0.016716	1	1	1	1	1	1	0	0	0	0	0	0	1	1	1	1	1	1	5	5	5	6	6	6	6	6	6	6	5	5	8	7	7	2	2	2	16.49	19.1
LIPB2_HUMAN	Q8ND30	Liprin-beta-2 OS=Homo sapiens GN=PPFIBP2 PE=1 SV=3	0	-0.846668	1	0.0481088			2.58	0.67	0.069467	0	0	0	0	0	0	0	0	0	0	0	0	0	0	0	0	0	0	4	3	0	3	2	0	4	3	0	4	3	0	4	4	0	1	1	0	15.197	13.7349
PAK3_HUMAN	O75914	Serine/threonine-protein kinase PAK 3 OS=Homo sapiens GN=PAK3 PE=1 SV=2	-0.762806	-2.15667	0.365178	0.000438879			2.84	0.65	0.066643	1	1	0	0	0	0	0	0	0	1	1	0	0	0	0	0	0	0	2	2	0	1	1	0	2	1	0	2	2	0	2	2	0	1	1	0	17.46	15.5705
SPAT5_HUMAN	Q8NB90	Spermatogenesis-associated protein 5 OS=Homo sapiens GN=SPATA5 PE=1 SV=3	0.253158	-1.09667	0.817402	0.00669418			2.62	0.53	0.03851	1	1	0	0	0	0	1	1	0	1	1	0	2	1	0	0	0	0	2	1	0	2	1	0	2	1	0	1	1	0	2	1	0	2	1	0	17.61	16.235
NUP50_HUMAN	Q9UKX7	Nuclear pore complex protein Nup50 OS=Homo sapiens GN=NUP50 PE=1 SV=2	-0.825308	3.93333	0.558806	0.000371378			4.15	0.75	0.022021	1	1	1	0	0	0	1	1	1	1	1	1	1	1	1	1	1	1	15	10	10	14	14	14	26	14	14	2	2	2	2	2	2	1	1	1	17.81	15.1441
SHIP2_HUMAN	O15357	Phosphatidylinositol 3,4,5-trisphosphate 5-phosphatase 2 OS=Homo sapiens GN=INPPL1 PE=1 SV=2	-2.95778	-4.96816	0.0263505	0.00808273			2.56	0.64	0.025863	1	1	1	0	0	0	0	0	0	6	6	6	7	7	6	5	5	4	1	1	0	2	2	2	0	0	0	10	10	9	12	12	11	2	2	2	14.32	15.8871
SMOC1_HUMAN	Q9H4F8	SPARC-related modular calcium-binding protein 1 OS=Homo sapiens GN=SMOC1 PE=1 SV=1	-1.54402	-0.853333	0.0140532	0.388648			3.28	0.71	0.018245	1	1	1	0	0	0	1	1	1	2	2	2	2	2	2	1	1	1	3	3	3	4	4	4	2	2	2	2	2	2	3	3	3	1	1	1	16.45	15.7579
NUDC1_HUMAN	Q96RS6	NudC domain-containing protein 1 OS=Homo sapiens GN=NUDCD1 PE=1 SV=2	-0.425798	-1.28	0.562048	0.00454111			2.83	0.65	0.015362	1	1	1	0	0	0	0	0	0	0	0	0	0	0	0	0	0	0	1	1	1	1	1	1	4	3	3	2	2	2	4	4	4	1	1	1	16.69	14.4937
TSP1_HUMAN	P07996	Thrombospondin-1 OS=Homo sapiens GN=THBS1 PE=1 SV=2	-1.31008	1.01	0.363307	0.0157802			3.69	0.71	0.014187	4	4	4	0	0	0	0	0	0	4	4	4	1	1	1	3	3	3	11	11	10	7	7	7	12	11	10	7	6	6	9	9	8	2	2	2	17.26	14.9068
DSG1_HUMAN	Q02413	Desmoglein-1 OS=Homo sapiens GN=DSG1 PE=1 SV=2	-0.789263	2.39667	0.545349	0.0268218			4.19	0.79	0.004674	2	2	2	0	0	0	0	0	0	0	0	0	3	3	3	0	0	0	20	10	10	5	4	3	7	5	5	2	2	2	6	5	5	1	1	1	17.37	15.4262
BUB1_HUMAN	O43683	Mitotic checkpoint serine/threonine-protein kinase BUB1 OS=Homo sapiens GN=BUB1 PE=1 SV=1	2.77118	-0.66967	0.00101627	0.479747	O43683	O43683	2.29	0.52	0.13797	2	2	2	1	1	1	1	1	1	0	0	0	0	0	0	0	0	0	0	0	0	0	0	0	0	0	0	0	0	0	1	1	1	0	0	0	16.93	16.72
PRR14_HUMAN	Q9BWN1	Proline-rich protein 14 OS=Homo sapiens GN=PRR14 PE=1 SV=1	0.644032	6.70402	0.475606	0.00152425			3.83	0.69	0.011335	1	1	1	0	0	0	0	0	0	0	0	0	0	0	0	0	0	0	17	9	8	13	8	7	19	13	11	0	0	0	2	2	2	0	0	0	17.45	15.0946
SOGA2_HUMAN	Q9Y4B5	Protein SOGA2 OS=Homo sapiens GN=SOGA2 PE=1 SV=5	5.17667	0.779996	6.19715e-05	0.307963			4.26	0.76	0.010137	72	52	47	29	28	24	59	46	41	8	8	8	7	7	4	4	4	4	3	3	2	1	1	1	6	5	5	2	2	2	0	0	0	0	0	0	22.43	22.54
ALDOB_HUMAN	P05062	Fructose-bisphosphate aldolase B OS=Homo sapiens GN=ALDOB PE=1 SV=2	4.44314	1.61945	0.0372019	0.630474			1.93	0.28	0.016215	2	1	0	1	1	0	1	1	0	1	1	0	0	0	0	0	0	0	1	1	0	1	1	0	2	1	0	1	1	0	3	1	0	0	0	0	22.23	22.64
SOGA3_HUMAN	Q5TF21	Protein SOGA3 OS=Homo sapiens GN=SOGA3 PE=2 SV=1	4.56568	-0.520487	1.3106e-05	0.660503			2.65	0.65	0.168436	4	4	0	2	2	0	3	3	0	0	0	0	1	1	0	0	0	0	1	1	0	0	0	0	0	0	0	0	0	0	0	0	0	0	0	0	20.44	20.6
AP3D1_HUMAN	O14617	AP-3 complex subunit delta-1 OS=Homo sapiens GN=AP3D1 PE=1 SV=1	0.342332	2.31046	0.825375	0.00823449			3.7	0.63	0.04184	0	0	0	1	1	1	0	0	0	0	0	0	1	1	1	2	2	2	1	1	1	1	1	1	1	1	1	0	0	0	1	1	1	0	0	0	15.1481	16.34
PFD5_HUMAN	Q99471	Prefoldin subunit 5 OS=Homo sapiens GN=PFDN5 PE=1 SV=2	0.760217	-3.94996	0.696458	0.0419312			3.33	0.62	0.022695	1	1	1	1	1	1	2	2	2	0	0	0	1	1	1	2	2	2	0	0	0	0	0	0	0	0	0	1	1	1	2	2	2	0	0	0	17.81	20.7
EP400_HUMAN	Q96L91	E1A-binding protein p400 OS=Homo sapiens GN=EP400 PE=1 SV=4	-1.81826	0	0.0351645	1			2.26	0.48	0.387092	1	1	1	0	0	0	3	3	3	0	0	0	0	0	0	0	0	0	0	0	0	0	0	0	0	0	0	0	0	0	0	0	0	0	0	0	13.74	15.0784
KIFC1_HUMAN	Q9BW19	Kinesin-like protein KIFC1 OS=Homo sapiens GN=KIFC1 PE=1 SV=2	1.71667	2.59346	0.0209754	0.191655			4.45	0.73	0.027941	5	5	5	1	1	1	3	3	3	1	1	1	3	3	3	1	1	1	10	10	10	7	7	7	13	12	12	5	5	5	10	10	10	0	0	0	18.81	17.98
SOGA1_HUMAN	O94964	Protein SOGA1 OS=Homo sapiens GN=SOGA1 PE=1 SV=2	6.80359	0.303367	0.000545622	0.536112			4.43	0.77	0.015749	42	35	33	17	17	15	43	37	34	1	1	1	5	5	3	0	0	0	0	0	0	0	0	0	1	1	1	0	0	0	1	1	1	0	0	0	21.96	23.15
GDE_HUMAN	P35573	Glycogen debranching enzyme OS=Homo sapiens GN=AGL PE=1 SV=3	-2.52307	1.18563	0.0228677	0.308125			3.87	0.72	0.009761	1	1	1	0	0	0	0	0	0	3	3	3	6	6	6	3	3	3	5	5	5	4	4	4	4	4	4	3	3	3	5	5	5	0	0	0	14.45	14.6985
PKP1_HUMAN	Q13835	Plakophilin-1 OS=Homo sapiens GN=PKP1 PE=1 SV=2	-0.643765	3.82141	0.548807	0.0471089			2.68	0.68	0.013792	1	1	1	0	0	0	0	0	0	0	0	0	1	1	1	0	0	0	7	7	7	1	1	1	4	4	4	0	0	0	0	0	0	0	0	0	13.96	15.7961
CDCA2_HUMAN	Q69YH5	Cell division cycle-associated protein 2 OS=Homo sapiens GN=CDCA2 PE=1 SV=2	1.59705	9.72932	0.16635	8.39149e-05	Q69YH5	Q69YH5	6.58	0.82	0.001903	5	5	5	0	0	0	1	1	1	0	0	0	0	0	0	0	0	0	29	20	20	27	20	20	33	22	22	0	0	0	0	0	0	0	0	0	18.13	16.3257
PAR12_HUMAN	Q9H0J9	Poly [ADP-ribose] polymerase 12 OS=Homo sapiens GN=PARP12 PE=1 SV=1	4.44318	2.99895	0.00985381	0.0490241			2.92	0.55	0.065863	2	2	1	1	1	0	2	2	1	1	1	1	0	0	0	0	0	0	1	1	0	1	1	0	1	1	0	0	0	0	1	1	0	0	0	0	18.54	21.47
PR14L_HUMAN	Q5THK1	Protein PRR14L OS=Homo sapiens GN=PRR14L PE=1 SV=1	1.21299	4.51494	0.324923	0.0473624		Q5THK1	4.96	0.75	0.013608	0	0	0	1	1	1	0	0	0	0	0	0	0	0	0	0	0	0	31	24	23	31	29	28	41	38	36	6	6	6	11	11	11	0	0	0	15.4522	18.62
NUBP1_HUMAN	P53384	Cytosolic Fe-S cluster assembly factor NUBP1 OS=Homo sapiens GN=NUBP1 PE=1 SV=2	-2.92884	1.4672	0.0149055	0.565949			1.72	0.43	0.172743	0	0	0	0	0	0	0	0	0	1	1	1	2	2	2	0	0	0	1	1	1	2	2	2	1	1	1	1	1	1	1	1	1	0	0	0	14.555	15.1622
RUSC2_HUMAN	Q8N2Y8	Iporin OS=Homo sapiens GN=RUSC2 PE=1 SV=3	4.67013	0	7.6162e-05	1		Q8N2Y8	4.51	0.78	0.013314	16	13	13	5	5	5	13	13	13	0	0	0	0	0	0	0	0	0	0	0	0	0	0	0	0	0	0	0	0	0	0	0	0	0	0	0	20.73	20.61
NBN_HUMAN	O60934	Nibrin OS=Homo sapiens GN=NBN PE=1 SV=1	0	3.17539	1	0.0230056			2.35	0.66	0.108324	0	0	0	0	0	0	0	0	0	0	0	0	0	0	0	0	0	0	4	4	4	2	2	2	5	5	5	1	1	1	0	0	0	0	0	0	15.1955	15.6145
K1731_HUMAN	Q9C0D2	Centrosomal protein KIAA1731 OS=Homo sapiens GN=KIAA1731 PE=2 SV=4	0.219724	6.95629	0.858035	0.00276708			4.96	0.75	0.007811	3	3	3	2	2	2	3	3	3	0	0	0	0	0	0	0	0	0	29	25	25	32	31	31	47	42	42	0	0	0	3	3	3	0	0	0	15.36	16.17
NHSL1_HUMAN	Q5SYE7	NHS-like protein 1 OS=Homo sapiens GN=NHSL1 PE=1 SV=2	2.62897	6.76497	0.0527027	1.0569e-05			3.72	0.78	0.005871	10	8	8	4	4	4	9	8	8	0	0	0	0	0	0	0	0	0	11	10	10	16	14	14	13	10	10	0	0	0	0	0	0	0	0	0	18.16	18.66
AIM1_HUMAN	Q9Y4K1	Absent in melanoma 1 protein OS=Homo sapiens GN=AIM1 PE=1 SV=3	3.50913	3.09877	0.0130272	0.00753668	Q9Y4K1		2.99	0.68	0.003379	17	17	17	3	3	3	11	11	11	2	2	2	1	1	1	0	0	0	2	2	2	3	3	3	2	2	2	0	0	0	0	0	0	0	0	0	19.25	18.28
SELH_HUMAN	Q8IZQ5	Selenoprotein H OS=Homo sapiens GN=SELH PE=1 SV=2	-1.42282	4.37086	0.514658	0.00192823			2.98	0.52	0.23815	0	0	0	0	0	0	1	1	1	0	0	0	0	0	0	1	1	1	2	2	2	1	1	1	2	2	2	0	0	0	0	0	0	0	0	0	14.6673	15.517
PKHA5_HUMAN	Q9HAU0	Pleckstrin homology domain-containing family A member 5 OS=Homo sapiens GN=PLEKHA5 PE=1 SV=1	0.74994	3.55666	0.508633	0.0403582			3.27	0.67	0.008952	4	4	4	0	0	0	0	0	0	1	1	1	0	0	0	0	0	0	10	9	9	4	4	4	8	8	8	1	1	1	3	3	3	0	0	0	17.05	15.8733
CYFP2_HUMAN	Q96F07	Cytoplasmic FMR1-interacting protein 2 OS=Homo sapiens GN=CYFIP2 PE=1 SV=2	3.49	4.82524	0.0223465	0.0633399			3.25	0.69	0.01592	14	10	0	4	4	0	10	10	1	4	4	0	1	1	0	2	2	0	9	9	0	11	11	0	16	14	1	4	4	0	3	3	0	0	0	0	21.56	21.3
TRIP4_HUMAN	Q15650	Activating signal cointegrator 1 OS=Homo sapiens GN=TRIP4 PE=1 SV=4	0	2.95056	1	0.0210935			1.81	0.6	0.072291	0	0	0	0	0	0	0	0	0	0	0	0	0	0	0	0	0	0	2	2	2	1	1	1	1	1	1	0	0	0	0	0	0	0	0	0	15.2025	16.768
AIM1L_HUMAN	Q8N1P7	Absent in melanoma 1-like protein OS=Homo sapiens GN=AIM1L PE=2 SV=1	4.19713	5.59228	0.00389326	0.000674262			3.7	0.73	0.00729	5	5	5	3	3	3	5	5	5	0	0	0	0	0	0	0	0	0	3	3	3	1	1	1	3	3	3	0	0	0	0	0	0	0	0	0	20.42	20.72
IMA5_HUMAN	O15131	Importin subunit alpha-6 OS=Homo sapiens GN=KPNA5 PE=1 SV=2	1.09523	6.31128	0.638306	0.0024352			3.23	0.63	0.136176	0	0	0	0	0	0	0	0	0	0	0	0	0	0	0	1	1	0	3	2	0	1	1	0	3	2	0	0	0	0	0	0	0	0	0	0	16.7333	17.3292
NCKP1_HUMAN	Q9Y2A7	Nck-associated protein 1 OS=Homo sapiens GN=NCKAP1 PE=1 SV=1	5.33667	5.49176	0.00416264	0.0766854			4.61	0.73	0.009054	17	17	16	3	3	3	10	10	10	1	1	1	1	1	1	1	1	1	17	16	15	17	16	15	20	18	18	5	5	5	5	5	5	0	0	0	22	20.92
ACTB_HUMAN	P60709	Actin, cytoplasmic 1 OS=Homo sapiens GN=ACTB PE=1 SV=1	0.0366675	-1.51667	0.982036	0.0105276			7.95	0.83	0.000375	63	21	0	78	22	0	69	20	0	63	19	0	60	23	0	84	26	0	56	18	0	87	29	0	82	28	0	80	25	0	91	26	0	63	20	0	28.53	31.69
ACTG_HUMAN	P63261	Actin, cytoplasmic 2 OS=Homo sapiens GN=ACTG1 PE=1 SV=1	0.0366675	-1.51667	0.982036	0.0105276			7.95	0.83	0.000375	63	21	0	78	22	0	69	20	0	63	19	0	60	23	0	84	26	0	56	18	0	87	29	0	82	28	0	80	25	0	91	26	0	63	20	0	28.53	31.69
ACTH_HUMAN	P63267	Actin, gamma-enteric smooth muscle OS=Homo sapiens GN=ACTG2 PE=1 SV=1	0.0933336	-1.36333	0.951927	0.0142951			3.89	0.8	0.000375	41	13	0	52	14	0	47	14	0	39	11	0	42	15	0	54	17	0	43	13	0	63	20	0	60	20	0	58	17	0	68	20	0	45	13	0	28.14	31.22
ACTC_HUMAN	P68032	Actin, alpha cardiac muscle 1 OS=Homo sapiens GN=ACTC1 PE=1 SV=1	0.0900008	-1.35667	0.954596	0.0133608			5.84	0.8	0.000375	46	14	0	60	16	0	55	15	0	45	12	0	48	16	0	60	18	0	45	14	0	67	21	0	66	21	0	62	18	0	75	21	0	50	14	0	28.17	31.36
ACTS_HUMAN	P68133	Actin, alpha skeletal muscle OS=Homo sapiens GN=ACTA1 PE=1 SV=1	0.0900008	-1.35667	0.954596	0.0133608			5.84	0.8	0.000375	46	14	0	60	16	0	55	15	0	45	12	0	48	16	0	60	18	0	45	14	0	67	21	0	66	21	0	62	18	0	75	21	0	50	14	0	28.17	31.36
ACTA_HUMAN	P62736	Actin, aortic smooth muscle OS=Homo sapiens GN=ACTA2 PE=1 SV=1	0.0933329	-1.36333	0.952022	0.0142951			3.89	0.8	0.000375	41	13	0	52	14	0	47	14	0	39	11	0	42	15	0	54	17	0	43	13	0	63	20	0	60	20	0	58	17	0	68	20	0	45	13	0	28	31.09
RL22_HUMAN	P35268	60S ribosomal protein L22 OS=Homo sapiens GN=RPL22 PE=1 SV=2	0.356667	-1.37333	0.776598	0.0148066			3.69	0.69	0.001745	14	9	7	11	8	7	11	7	6	13	8	7	12	8	7	13	8	6	15	8	7	15	8	7	15	8	7	14	8	7	20	8	7	5	5	4	26.37	29.04
RL27_HUMAN	P61353	60S ribosomal protein L27 OS=Homo sapiens GN=RPL27 PE=1 SV=2	0.523333	-1.09667	0.735998	0.0487397			4.42	0.75	0.001301	18	10	10	17	11	11	23	12	12	15	9	9	15	8	8	18	11	11	19	13	13	18	11	11	22	13	13	19	12	12	20	13	13	8	6	6	26.92	30.21
ANXA2_HUMAN	P07355	Annexin A2 OS=Homo sapiens GN=ANXA2 PE=1 SV=2	0.726666	-1.44	0.661361	0.046867			6.06	0.77	0.000308	45	26	7	47	24	7	50	28	7	29	18	5	37	21	4	55	27	7	44	23	5	55	27	7	52	27	7	52	22	5	57	28	7	37	23	7	26.14	29.33
ACTBL_HUMAN	Q562R1	Beta-actin-like protein 2 OS=Homo sapiens GN=ACTBL2 PE=1 SV=2	0.0499999	-1.54333	0.973388	0.0116067			3.89	0.8	0.000375	20	6	0	23	7	0	20	6	0	17	4	0	19	7	0	27	9	0	18	5	0	33	11	0	30	11	0	27	9	0	31	9	0	17	6	0	26.46	29.34
TBA1C_HUMAN	Q9BQE3	Tubulin alpha-1C chain OS=Homo sapiens GN=TUBA1C PE=1 SV=1	0.53	-1.00333	0.680838	0.0205503			5.81	0.83	0.001924	59	18	0	56	17	0	72	21	1	47	15	1	60	16	0	57	23	2	40	16	0	51	18	0	51	17	0	48	18	0	56	17	0	33	17	0	27.35	30.29
TBA1A_HUMAN	Q71U36	Tubulin alpha-1A chain OS=Homo sapiens GN=TUBA1A PE=1 SV=1	0.526667	-1.00333	0.682413	0.0205503			5.81	0.83	0.001924	59	18	0	57	18	0	71	20	0	46	14	0	61	17	0	55	21	0	40	16	0	52	19	0	51	17	0	48	18	0	56	17	0	33	17	0	27.35	30.29
TBA1B_HUMAN	P68363	Tubulin alpha-1B chain OS=Homo sapiens GN=TUBA1B PE=1 SV=1	0.526667	-1.00333	0.682413	0.0205503			5.81	0.83	0.001924	59	18	0	57	18	0	71	20	0	46	14	0	61	17	0	55	21	0	40	16	0	52	19	0	51	17	0	48	18	0	56	17	0	33	17	0	27.35	30.29
AXA2L_HUMAN	A6NMY6	Putative annexin A2-like protein OS=Homo sapiens GN=ANXA2P2 PE=5 SV=2	0.656666	-1.41667	0.688169	0.0394555			6.06	0.77	0.000308	35	19	0	35	17	0	39	21	0	22	13	0	31	17	0	41	20	0	35	18	0	40	20	0	39	20	0	38	17	0	42	21	0	27	16	0	25.82	28.96
TBA3C_HUMAN	Q13748	Tubulin alpha-3C/D chain OS=Homo sapiens GN=TUBA3C PE=1 SV=3	0.470001	-0.99	0.701623	0.020177			5.77	0.83	0.001924	48	15	0	46	14	0	59	16	0	40	12	0	47	14	0	44	16	0	35	14	0	41	15	0	40	15	0	44	15	0	46	14	0	30	15	0	27.1	29.87
ACTBM_HUMAN	Q9BYX7	Putative beta-actin-like protein 3 OS=Homo sapiens GN=POTEKP PE=5 SV=1	0.0933336	-1.55	0.953734	0.0184395			4.33	0.8	0.012126	20	5	0	21	5	0	22	4	0	22	5	0	19	5	0	24	5	0	15	4	0	22	5	0	25	5	0	22	5	0	26	4	0	21	5	0	26.35	29.81
RL11_HUMAN	P62913	60S ribosomal protein L11 OS=Homo sapiens GN=RPL11 PE=1 SV=2	0.256667	-1.01333	0.850979	0.0438271			3.59	0.74	0.000636	10	5	5	5	2	2	9	6	6	7	4	4	8	4	4	6	3	3	9	4	4	11	5	5	11	5	5	11	5	5	17	7	7	4	2	2	25.44	28.37
ROA1_HUMAN	P09651	Heterogeneous nuclear ribonucleoprotein A1 OS=Homo sapiens GN=HNRNPA1 PE=1 SV=5	0.513333	-1.07667	0.744279	0.0498477			5.6	0.82	0.000308	40	14	4	46	17	6	44	16	6	28	10	4	28	10	4	52	16	7	40	9	4	49	12	5	49	14	6	46	10	4	51	13	5	24	12	5	25.18	28.88
2A5D_HUMAN	Q14738	Serine/threonine-protein phosphatase 2A 56 kDa regulatory subunit delta isoform OS=Homo sapiens GN=PPP2R5D PE=1 SV=1	0.0433331	0.0433337	0.775537	0.652937			3.98	0.69	0.002456	1	1	0	1	1	0	1	1	0	1	1	0	1	1	0	1	1	0	31	9	0	26	8	0	30	8	0	28	9	0	33	8	0	13	5	0	19.49	19.76
TBA3E_HUMAN	Q6PEY2	Tubulin alpha-3E chain OS=Homo sapiens GN=TUBA3E PE=1 SV=2	0.476667	-1	0.705311	0.02014			4.73	0.83	0.001924	35	9	0	37	10	0	45	11	0	32	8	0	36	9	0	34	10	0	29	9	0	31	9	0	29	9	0	32	8	0	36	8	0	21	8	0	26.77	29.71
ROA2_HUMAN	P22626	Heterogeneous nuclear ribonucleoproteins A2/B1 OS=Homo sapiens GN=HNRNPA2B1 PE=1 SV=2	0.456668	-1.30667	0.760769	0.0461264			6.24	0.81	0.000189	32	15	15	39	20	20	48	21	21	29	14	14	35	14	14	46	20	20	31	14	14	39	16	16	38	16	16	39	14	14	39	17	17	23	12	12	25.41	28.77
RU2A_HUMAN	P09661	U2 small nuclear ribonucleoprotein A' OS=Homo sapiens GN=SNRPA1 PE=1 SV=2	0.316667	-1.25333	0.642308	0.0382835			5.21	0.75	0.006882	28	15	15	12	9	9	25	15	15	21	13	13	29	18	18	16	10	10	33	19	19	32	19	19	35	19	19	33	18	18	37	19	19	13	8	8	25.79	27.3
EF1G_HUMAN	P26641	Elongation factor 1-gamma OS=Homo sapiens GN=EEF1G PE=1 SV=3	0.35	-0.936666	0.765274	0.013084			4.25	0.75	0.003929	29	12	12	24	13	13	22	11	11	23	11	11	24	11	11	20	11	11	27	11	11	37	13	13	42	12	12	39	13	13	42	14	14	21	10	10	25.65	28.16
RS19_HUMAN	P39019	40S ribosomal protein S19 OS=Homo sapiens GN=RPS19 PE=1 SV=2	0.523334	-1.49667	0.761943	0.0230831			4.32	0.75	0.003572	17	12	12	19	12	12	23	13	13	15	10	10	20	13	13	20	12	12	16	12	12	15	11	11	19	12	12	17	11	11	16	13	13	10	9	9	25.68	29.68
RS15A_HUMAN	P62244	40S ribosomal protein S15a OS=Homo sapiens GN=RPS15A PE=1 SV=2	0.406668	-1.52	0.81703	0.0397375			5.29	0.79	0.005656	16	10	10	20	12	12	20	11	11	11	8	8	12	9	9	20	11	11	11	8	8	8	6	6	11	7	7	13	9	9	15	10	10	9	7	7	25.79	29.75
2AAB_HUMAN	P30154	Serine/threonine-protein phosphatase 2A 65 kDa regulatory subunit A beta isoform OS=Homo sapiens GN=PPP2R1B PE=1 SV=3	0.276667	-0.699999	0.0585104	0.143483			5.19	0.78	0.00272	68	25	18	21	13	10	54	24	20	51	23	19	65	26	20	21	15	13	51	23	18	54	26	20	101	30	24	49	24	19	83	29	22	34	21	18	27.03	26.99
RL27A_HUMAN	P46776	60S ribosomal protein L27a OS=Homo sapiens GN=RPL27A PE=1 SV=2	0.44	-1.24	0.782479	0.0329897			4.13	0.71	0.003974	7	5	5	6	4	4	9	5	5	7	4	4	6	3	3	8	5	5	9	5	5	8	4	4	12	5	5	12	5	5	10	4	4	4	3	3	24.94	28.33
RL21_HUMAN	P46778	60S ribosomal protein L21 OS=Homo sapiens GN=RPL21 PE=1 SV=2	0.44	-1.37	0.799439	0.0153042			4.51	0.76	0.007542	12	8	8	12	9	9	15	11	11	12	8	8	14	11	11	19	12	12	14	9	9	17	11	11	21	14	14	16	11	11	21	14	14	7	5	5	24.84	28.88
RL23A_HUMAN	P62750	60S ribosomal protein L23a OS=Homo sapiens GN=RPL23A PE=1 SV=1	0.176667	-1.11333	0.904727	0.0309495			4.21	0.67	0.002963	25	10	10	25	11	11	26	9	9	25	9	9	27	10	10	29	13	13	17	8	8	21	10	10	26	11	11	22	9	9	28	12	12	12	7	7	25.9	28.91
LIPA1_HUMAN	Q13136	Liprin-alpha-1 OS=Homo sapiens GN=PPFIA1 PE=1 SV=1	-2.34964	0.689999	0.113256	0.0741995	Q13136		7.41	0.82	0.001777	6	6	4	0	0	0	2	2	1	6	6	4	5	5	3	4	4	3	212	78	59	201	76	57	232	84	64	132	58	46	160	66	52	83	52	43	18	14.7611
RAN_HUMAN	P62826	GTP-binding nuclear protein Ran OS=Homo sapiens GN=RAN PE=1 SV=3	0.0899989	-2.24667	0.953654	0.0337684			3.36	0.78	0.006282	12	9	9	11	8	8	11	9	9	9	7	7	13	9	9	12	8	8	10	7	7	17	10	10	12	9	9	15	10	10	15	9	9	6	5	5	23.89	27.8
RS12_HUMAN	P25398	40S ribosomal protein S12 OS=Homo sapiens GN=RPS12 PE=1 SV=3	0.190001	-1.62333	0.909671	0.0332781			2.48	0.68	0.028708	8	3	3	7	2	2	9	3	3	7	2	2	7	2	2	7	3	3	5	2	2	6	3	3	7	3	3	7	3	3	6	3	3	3	2	2	25.36	29.26
POTEE_HUMAN	Q6S8J3	POTE ankyrin domain family member E OS=Homo sapiens GN=POTEE PE=1 SV=3	0.116667	-1.27	0.940221	0.0133428			4.33	0.8	0.001985	29	7	0	32	7	0	36	7	0	32	7	0	30	7	0	35	7	0	27	6	0	35	7	0	38	7	0	36	7	0	41	6	0	34	7	0	25.99	29.19
TBA4A_HUMAN	P68366	Tubulin alpha-4A chain OS=Homo sapiens GN=TUBA4A PE=1 SV=1	0.436666	-0.853333	0.724051	0.0343022			5.81	0.79	0.001924	45	17	3	45	15	2	55	18	3	34	13	3	39	14	2	46	20	3	32	14	2	35	16	2	33	15	2	38	16	2	41	16	3	26	15	2	26.73	29.51
POTEF_HUMAN	A5A3E0	POTE ankyrin domain family member F OS=Homo sapiens GN=POTEF PE=1 SV=2	0.113333	-1.27	0.941798	0.0127752			4.33	0.8	0.001985	27	6	0	31	6	0	36	7	0	30	6	0	29	6	0	34	6	0	25	5	0	32	6	0	35	6	0	34	6	0	39	5	0	32	6	0	25.96	29.16
POTEI_HUMAN	P0CG38	POTE ankyrin domain family member I OS=Homo sapiens GN=POTEI PE=3 SV=1	0.12	-1.28667	0.938902	0.0126104			4.33	0.69	0.001985	22	6	0	24	6	0	28	6	0	24	6	0	23	6	0	23	6	0	20	5	0	25	6	0	30	6	0	28	6	0	30	5	0	27	6	0	25.82	29.05
KPYM_HUMAN	P14618	Pyruvate kinase isozymes M1/M2 OS=Homo sapiens GN=PKM PE=1 SV=4	0.53	-1.30667	0.680958	0.00840758			6.19	0.8	0.002195	46	22	21	45	22	21	42	21	20	35	21	20	41	20	19	43	26	25	30	16	15	49	23	21	64	25	23	38	17	16	57	25	23	32	17	16	25.49	28.24
TBA8_HUMAN	Q9NY65	Tubulin alpha-8 chain OS=Homo sapiens GN=TUBA8 PE=1 SV=1	0.473333	-0.843334	0.707095	0.0365918			5.77	0.79	0.002532	24	10	0	30	11	0	30	10	0	23	8	0	27	10	0	25	11	0	19	9	0	21	10	0	20	10	0	27	10	0	25	9	0	18	10	0	26.44	29.29
RL5_HUMAN	P46777	60S ribosomal protein L5 OS=Homo sapiens GN=RPL5 PE=1 SV=3	0.236667	-1.06	0.880418	0.0208413			5.51	0.78	0.001038	35	17	17	54	21	21	58	21	21	40	21	21	36	19	19	52	23	23	45	18	18	53	18	18	47	18	18	46	17	17	52	23	23	13	8	8	25	28.51
RL10_HUMAN	P27635	60S ribosomal protein L10 OS=Homo sapiens GN=RPL10 PE=1 SV=4	0.723333	-0.686666	0.719016	0.0119945			4.62	0.75	0.011931	19	10	6	22	13	6	18	9	5	17	7	5	17	10	6	21	11	6	18	9	5	17	9	4	28	15	9	21	14	9	29	17	12	9	7	5	24.81	28.77
RSSA_HUMAN	P08865	40S ribosomal protein SA OS=Homo sapiens GN=RPSA PE=1 SV=4	0.293332	-0.803333	0.857036	0.0237107			6.03	0.77	0.003704	23	12	12	36	13	13	34	13	13	26	11	11	22	10	10	34	14	14	19	10	10	22	11	11	20	11	11	19	10	10	21	10	10	8	5	5	25.47	29.32
POTEJ_HUMAN	P0CG39	POTE ankyrin domain family member J OS=Homo sapiens GN=POTEJ PE=3 SV=1	0.133333	-1.76	0.93435	0.00701349			4.33	0.69	0.012126	15	5	0	15	5	0	18	5	0	16	5	0	15	5	0	14	5	0	12	4	0	16	5	0	22	5	0	20	5	0	21	4	0	19	5	0	24.63	28.1
RS30_HUMAN	P62861	40S ribosomal protein S30 OS=Homo sapiens GN=FAU PE=1 SV=1	0.406666	-1.22	0.827185	0.0490226			2.74	0.65	0.015691	5	3	3	5	3	3	7	4	4	7	3	3	6	4	4	6	4	4	6	3	3	5	3	3	7	4	4	6	3	3	7	4	4	3	3	3	24.58	29.05
RL9_HUMAN	P32969	60S ribosomal protein L9 OS=Homo sapiens GN=RPL9 PE=1 SV=1	0.82	-1.45	0.658211	0.0382309			4.59	0.65	0.000293	7	5	5	12	9	9	15	7	7	5	3	3	3	2	2	11	6	6	5	3	3	9	5	5	9	6	6	7	4	4	7	5	5	5	4	4	23.43	27.6
PAL4G_HUMAN	A2BFH1	Peptidyl-prolyl cis-trans isomerase A-like 4G OS=Homo sapiens GN=PPIAL4G PE=2 SV=1	0.583333	-5.54449	0.725693	0.260693			2.12	0.35	0.093563	1	1	0	2	1	0	1	1	0	1	1	0	1	1	0	2	2	0	0	0	0	1	1	0	0	0	0	0	0	0	1	1	0	1	1	0	23.67	26.94
RL36A_HUMAN	P83881	60S ribosomal protein L36a OS=Homo sapiens GN=RPL36A PE=1 SV=2	0.383333	-1.24667	0.794066	0.0195088			3.57	0.68	0.029751	4	4	0	3	2	0	5	4	0	5	4	0	4	4	0	3	3	0	5	4	0	7	5	0	8	6	0	6	4	0	8	5	1	1	1	0	24.4	27.47
RL36L_HUMAN	Q969Q0	60S ribosomal protein L36a-like OS=Homo sapiens GN=RPL36AL PE=1 SV=3	0.383333	-1.24333	0.794066	0.0202375			3.57	0.68	0.029751	4	4	0	3	2	0	5	4	0	5	4	0	4	4	0	3	3	0	5	4	0	7	5	0	8	6	0	6	4	0	7	4	0	1	1	0	24.4	27.47
PAL4A_HUMAN	Q9Y536	Peptidyl-prolyl cis-trans isomerase A-like 4A/B/C OS=Homo sapiens GN=PPIAL4A PE=1 SV=1	0.59	-5.16446	0.722378	0.26753			2.12	0.35	0.093563	1	1	0	2	1	0	1	1	0	1	1	0	1	1	0	2	2	0	0	0	0	1	1	0	0	0	0	0	0	0	1	1	0	1	1	0	23.56	26.82
PAL4D_HUMAN	F5H284	Peptidyl-prolyl cis-trans isomerase A-like 4D OS=Homo sapiens GN=PPIAL4D PE=3 SV=1	0.59	-5.36616	0.722378	0.236187			2.12	0.35	0.093563	1	1	0	2	1	0	1	1	0	1	1	0	1	1	0	2	2	0	0	0	0	1	1	0	0	0	0	0	0	0	1	1	0	1	1	0	23.56	26.82
HNRPF_HUMAN	P52597	Heterogeneous nuclear ribonucleoprotein F OS=Homo sapiens GN=HNRNPF PE=1 SV=3	0.31	-0.88	0.811412	0.029356			5.24	0.77	0.004526	15	8	6	14	8	6	15	9	7	18	8	6	12	7	6	12	8	6	17	11	9	20	12	11	17	8	7	17	10	9	24	12	10	9	5	4	24.76	27.76
NONO_HUMAN	Q15233	Non-POU domain-containing octamer-binding protein OS=Homo sapiens GN=NONO PE=1 SV=4	0.756667	-1.07333	0.652615	0.02881			5.16	0.78	0.004308	32	21	20	61	33	32	41	26	25	18	13	12	20	14	13	50	31	30	24	18	17	31	20	19	40	23	22	30	21	20	30	21	19	13	10	9	25.62	29.23
SYDC_HUMAN	P14868	Aspartate--tRNA ligase, cytoplasmic OS=Homo sapiens GN=DARS PE=1 SV=2	0.306667	-0.616666	0.690866	0.119695			5.43	0.77	0.002354	19	16	16	16	16	16	22	17	17	17	16	16	23	20	20	18	18	18	30	21	21	46	29	29	49	27	27	39	23	23	46	27	27	21	18	18	23.92	25.73
HNRH1_HUMAN	P31943	Heterogeneous nuclear ribonucleoprotein H OS=Homo sapiens GN=HNRNPH1 PE=1 SV=4	0.403334	-1.18667	0.757406	0.0220968			5.5	0.77	0.015212	15	7	2	16	9	3	15	8	5	12	7	4	16	7	3	12	8	2	12	7	2	17	8	4	12	7	3	16	8	3	17	8	4	10	8	4	24.44	27.35
RS27L_HUMAN	Q71UM5	40S ribosomal protein S27-like OS=Homo sapiens GN=RPS27L PE=1 SV=3	0.0699997	-1.96	0.964017	0.0237232			3.82	0.71	0.030847	4	3	1	6	4	3	8	5	2	5	4	1	5	4	2	7	5	3	5	4	2	6	4	1	5	4	1	5	3	1	7	5	3	2	2	0	23.16	26.65
HNRH2_HUMAN	P55795	Heterogeneous nuclear ribonucleoprotein H2 OS=Homo sapiens GN=HNRNPH2 PE=1 SV=1	0.386667	-1.17667	0.774046	0.0222631			4.72	0.77	0.015212	11	4	0	12	6	1	7	2	0	5	2	0	12	4	0	9	5	0	12	6	2	14	6	2	11	6	2	13	7	2	11	5	2	6	4	0	24.28	27.17
RL36_HUMAN	Q9Y3U8	60S ribosomal protein L36 OS=Homo sapiens GN=RPL36 PE=1 SV=3	0.303333	-1.32	0.893851	0.0175863			3.99	0.68	0.001553	13	8	8	13	9	9	17	10	10	13	7	7	11	6	6	15	8	8	7	5	5	11	7	7	11	6	6	14	10	10	14	10	10	6	4	4	23.31	28.88
RL24_HUMAN	P83731	60S ribosomal protein L24 OS=Homo sapiens GN=RPL24 PE=1 SV=1	0.243334	-1.22333	0.899796	0.0173416			3.16	0.69	0.039709	5	4	4	7	3	3	7	5	5	6	5	5	5	4	4	6	4	4	5	4	4	8	5	5	9	5	5	7	5	5	11	5	5	2	2	2	23.36	28.03
LANC1_HUMAN	O43813	LanC-like protein 1 OS=Homo sapiens GN=LANCL1 PE=1 SV=1	0.176667	-0.429999	0.389868	0.454465			3.44	0.71	0.001704	17	8	8	7	5	5	11	7	7	12	8	8	10	6	6	8	5	5	17	8	8	19	9	9	17	9	9	18	10	10	17	10	10	7	6	6	24.44	24.97
CDK1_HUMAN	P06493	Cyclin-dependent kinase 1 OS=Homo sapiens GN=CDK1 PE=1 SV=3	0.563333	-1.35667	0.73513	0.0269186			5.01	0.69	0.004492	14	10	9	14	11	9	13	10	9	14	10	8	12	8	6	21	14	12	14	10	8	16	12	10	20	15	14	19	12	11	19	13	11	8	7	5	23.45	26.71
IF4A1_HUMAN	P60842	Eukaryotic initiation factor 4A-I OS=Homo sapiens GN=EIF4A1 PE=1 SV=1	0.28	-1.08333	0.866442	0.0430906			5.85	0.77	0.000693	25	16	8	43	31	15	43	25	12	32	20	8	34	20	9	49	30	15	20	14	6	34	22	10	35	22	10	31	17	9	33	16	8	13	12	5	25.01	28.9
TCPH_HUMAN	Q99832	T-complex protein 1 subunit eta OS=Homo sapiens GN=CCT7 PE=1 SV=2	0.463334	-0.913333	0.636608	0.00611699			5.23	0.73	0.004179	12	9	9	10	8	8	7	6	6	10	8	8	8	6	6	9	7	7	20	16	16	22	16	16	36	17	17	22	15	15	25	17	17	15	12	12	23.01	25.17
TCPZ_HUMAN	P40227	T-complex protein 1 subunit zeta OS=Homo sapiens GN=CCT6A PE=1 SV=3	0.303334	-1.08333	0.826236	0.00539788			5.29	0.73	0.001791	7	7	5	14	14	11	8	7	4	9	8	7	8	7	5	9	9	7	12	11	9	17	15	12	26	16	13	19	14	11	16	13	11	10	9	6	22.58	25.83
HNRPK_HUMAN	P61978	Heterogeneous nuclear ribonucleoprotein K OS=Homo sapiens GN=HNRNPK PE=1 SV=1	0.51	-1.58	0.757263	0.01368			5.54	0.82	0.001015	22	14	14	32	19	19	31	19	19	21	14	14	21	13	13	29	19	19	21	13	13	25	15	15	35	15	15	22	14	14	33	16	16	17	12	12	23.99	27.77
TCPQ_HUMAN	P50990	T-complex protein 1 subunit theta OS=Homo sapiens GN=CCT8 PE=1 SV=4	0.303334	-1	0.798268	0.0241527			4.81	0.73	0.004015	15	15	15	19	19	19	18	16	16	15	14	14	15	13	13	20	17	17	27	21	21	38	25	25	36	26	26	29	22	22	34	25	25	22	18	18	22.95	25.58
PDIA1_HUMAN	P07237	Protein disulfide-isomerase OS=Homo sapiens GN=P4HB PE=1 SV=3	0.426667	-1.21333	0.780031	0.0438756			4.63	0.76	0.000516	20	16	16	23	19	19	19	16	16	18	15	15	20	17	17	24	17	17	22	18	18	29	24	24	34	23	23	27	20	20	30	21	21	20	18	18	22.84	26.13
RS28_HUMAN	P62857	40S ribosomal protein S28 OS=Homo sapiens GN=RPS28 PE=1 SV=1	1.16333	-1.82667	0.597826	0.00840072			3.21	0.71	0.072059	4	3	3	7	3	3	7	5	5	3	2	2	6	4	4	8	4	4	4	3	3	3	2	2	4	3	3	5	4	4	6	5	5	1	1	1	24.04	28.8
PSA6_HUMAN	P60900	Proteasome subunit alpha type-6 OS=Homo sapiens GN=PSMA6 PE=1 SV=1	0.643335	-1.61667	0.66449	0.0359031			4.15	0.71	0.011371	5	5	5	7	5	5	7	5	5	6	5	5	5	4	4	7	5	5	6	6	6	9	8	8	9	7	7	7	7	7	9	7	7	4	4	4	22.45	25.53
PDIA3_HUMAN	P30101	Protein disulfide-isomerase A3 OS=Homo sapiens GN=PDIA3 PE=1 SV=4	0.27	-1.63667	0.877449	0.0128301			5.71	0.82	0.001911	11	11	11	19	14	14	16	13	13	13	13	13	14	12	12	23	18	18	16	15	15	27	20	20	31	21	21	30	23	23	33	25	25	15	14	14	22.66	26.29
SAHH_HUMAN	P23526	Adenosylhomocysteinase OS=Homo sapiens GN=AHCY PE=1 SV=4	0.476667	-1.16	0.741865	0.0422615			5	0.75	0.008311	11	9	9	11	8	8	6	6	6	8	7	7	9	7	7	10	8	8	11	10	10	15	13	13	16	12	12	16	12	12	18	12	12	7	7	7	23.09	25.74
TCPA_HUMAN	P17987	T-complex protein 1 subunit alpha OS=Homo sapiens GN=TCP1 PE=1 SV=1	0.576667	-1.22667	0.660535	0.00304683			4.68	0.78	0.004862	19	13	13	19	14	14	16	14	14	16	13	13	14	11	11	15	12	12	15	10	10	19	12	12	37	15	15	21	14	14	26	16	16	14	12	12	23.14	25.74
KT222_HUMAN	Q8N1A0	Keratin-like protein KRT222 OS=Homo sapiens GN=KRT222 PE=2 SV=1	0.0500005	-1.53667	0.970473	0.199897			2.61	0.64	0.05735	5	1	0	6	1	0	5	1	0	2	1	0	4	1	0	7	1	0	2	1	0	2	1	0	1	1	0	2	1	0	2	1	0	3	1	0	26.02	29.41
HNRPC_HUMAN	P07910	Heterogeneous nuclear ribonucleoproteins C1/C2 OS=Homo sapiens GN=HNRNPC PE=1 SV=4	0.463333	-0.773333	0.766556	0.0186076			4.29	0.72	0.002557	35	12	5	33	13	6	30	12	6	32	13	6	33	13	6	36	13	6	26	11	5	26	10	5	32	13	6	25	11	5	31	13	6	15	10	4	24.44	27.89
PSB6_HUMAN	P28072	Proteasome subunit beta type-6 OS=Homo sapiens GN=PSMB6 PE=1 SV=4	-0.193333	-1.33333	0.842784	0.0675714			3.32	0.62	0.031929	4	4	4	2	2	2	4	4	4	4	4	4	4	4	4	3	3	3	5	4	4	5	4	4	6	5	5	5	4	4	6	5	5	4	4	4	22.57	22.27
PSA7_HUMAN	O14818	Proteasome subunit alpha type-7 OS=Homo sapiens GN=PSMA7 PE=1 SV=1	0.78	-1.77333	0.617357	0.0367838			4.52	0.81	0.005737	11	8	5	12	10	5	10	8	5	10	8	5	8	8	5	12	9	4	7	6	4	11	8	5	11	8	5	10	8	5	13	9	6	6	6	3	23.02	26.07
PLEC_HUMAN	Q15149	Plectin OS=Homo sapiens GN=PLEC PE=1 SV=3	0.0366669	-1.72667	0.983719	0.107824			6.69	0.85	0.000163	940	347	337	1384	393	382	1694	435	423	955	334	323	1018	376	366	1474	463	452	123	106	104	69	66	63	162	142	137	120	103	98	174	154	150	149	137	131	27.32	31.53
IF4A3_HUMAN	P38919	Eukaryotic initiation factor 4A-III OS=Homo sapiens GN=EIF4A3 PE=1 SV=4	0.333333	-1.15333	0.830336	0.0394458			4.01	0.71	0.005679	14	12	9	21	17	13	19	14	10	16	12	8	17	14	10	20	17	13	13	12	8	19	15	11	16	12	8	17	13	10	24	17	14	10	10	7	23.79	27.4
KPYR_HUMAN	P30613	Pyruvate kinase isozymes R/L OS=Homo sapiens GN=PKLR PE=1 SV=2	0.386666	-1.63333	0.751916	0.0142584			2.85	0.57	0.003714	3	2	1	2	1	0	2	1	0	3	2	1	2	1	0	3	2	1	3	1	0	4	2	0	3	2	0	7	2	1	6	2	0	6	2	1	22.78	25.13
BOLA2_HUMAN	Q9H3K6	BolA-like protein 2 OS=Homo sapiens GN=BOLA2 PE=1 SV=1	0.639999	-1.46333	0.322292	0.0136107			4.58	0.73	0.032752	6	3	3	3	3	3	4	3	3	4	3	3	4	3	3	2	2	2	4	3	3	4	3	3	5	3	3	4	3	3	5	3	3	2	2	2	23.65	25.3
BUB3_HUMAN	O43684	Mitotic checkpoint protein BUB3 OS=Homo sapiens GN=BUB3 PE=1 SV=1	0.69	-0.853334	0.533892	0.00989558			6.07	0.81	0.004372	16	8	8	12	8	8	20	10	10	13	8	8	16	8	8	13	8	8	12	9	9	16	9	9	16	10	10	12	9	9	15	9	9	9	7	7	23.4	25.38
SRP14_HUMAN	P37108	Signal recognition particle 14 kDa protein OS=Homo sapiens GN=SRP14 PE=1 SV=2	0.236666	-0.69	0.853897	0.0724949			4.95	0.69	0.00348	7	6	6	6	5	5	7	5	5	5	4	4	8	5	5	9	6	6	10	5	5	10	6	6	12	7	7	9	6	6	14	7	7	5	4	4	22.96	25.09
HNRPD_HUMAN	Q14103	Heterogeneous nuclear ribonucleoprotein D0 OS=Homo sapiens GN=HNRNPD PE=1 SV=1	0.186666	-0.756667	0.868674	0.0126853			5.39	0.74	0.032042	9	5	4	11	7	6	13	6	5	8	6	5	12	8	7	10	7	6	12	9	8	12	10	9	16	11	9	9	7	6	15	10	8	4	4	3	23.13	25.75
TCPE_HUMAN	P48643	T-complex protein 1 subunit epsilon OS=Homo sapiens GN=CCT5 PE=1 SV=1	0.4	-1.17	0.787394	0.000500097			5.09	0.7	0.001972	11	9	9	12	10	10	11	9	9	11	7	7	12	9	9	13	11	11	19	14	14	20	16	16	39	17	17	22	16	16	29	19	19	16	13	13	22.34	25.01
AIMP1_HUMAN	Q12904	Aminoacyl tRNA synthase complex-interacting multifunctional protein 1 OS=Homo sapiens GN=AIMP1 PE=1 SV=2	0.253333	-0.35	0.818892	0.375627			4.85	0.73	0.00059	12	8	8	7	6	6	11	8	8	11	7	7	10	7	7	12	6	6	15	9	9	19	12	12	20	14	14	15	9	9	22	13	13	9	7	7	22.14	25.09
SYEP_HUMAN	P07814	Bifunctional glutamate/proline--tRNA ligase OS=Homo sapiens GN=EPRS PE=1 SV=5	-0.0199998	-0.0133336	0.984442	0.956678			6.05	0.82	0.000579	68	41	41	56	34	34	37	29	29	57	37	37	50	32	32	52	38	38	92	58	58	81	56	56	93	56	56	72	50	50	86	51	51	41	35	35	22.8	24.86
SRSF5_HUMAN	Q13243	Serine/arginine-rich splicing factor 5 OS=Homo sapiens GN=SRSF5 PE=1 SV=1	0.24	-0.8	0.859114	0.0317274			3.89	0.73	0.00522	4	2	1	6	4	3	7	5	4	6	4	3	4	3	2	5	4	3	7	3	2	5	2	1	7	3	2	8	4	3	7	3	2	3	2	1	23.05	26.12
TCPB_HUMAN	P78371	T-complex protein 1 subunit beta OS=Homo sapiens GN=CCT2 PE=1 SV=4	0.426666	-1.07	0.774483	0.0207425			5.8	0.79	0.005203	15	13	13	19	18	18	15	14	14	11	10	10	11	10	10	20	18	18	18	14	14	26	20	20	22	18	18	22	16	16	29	23	23	14	13	13	22.4	25.63
SERPH_HUMAN	P50454	Serpin H1 OS=Homo sapiens GN=SERPINH1 PE=1 SV=2	0.366667	-1.19	0.819849	0.0217515			5.7	0.73	0.006026	10	9	9	15	14	14	11	10	10	11	10	10	7	7	7	16	15	15	12	10	10	15	13	13	17	14	14	14	12	12	20	14	14	9	7	7	22.33	26.01
RBBP4_HUMAN	Q09028	Histone-binding protein RBBP4 OS=Homo sapiens GN=RBBP4 PE=1 SV=3	0.340001	-0.833333	0.737692	0.0316272			5.89	0.73	0.000663	7	6	1	4	4	1	6	4	1	4	3	0	6	4	1	5	4	1	8	6	0	8	7	1	9	7	1	8	6	0	8	6	0	7	6	1	23.37	25.01
RSMN_HUMAN	P63162	Small nuclear ribonucleoprotein-associated protein N OS=Homo sapiens GN=SNRPN PE=1 SV=1	0.420001	-1.13	0.808455	0.047567			4.69	0.78	0.000702	9	5	0	11	6	0	12	6	0	10	6	0	11	6	0	9	5	0	5	4	0	6	4	0	8	6	0	6	4	0	6	5	0	2	2	0	22.86	26.9
RSMB_HUMAN	P14678	Small nuclear ribonucleoprotein-associated proteins B and B' OS=Homo sapiens GN=SNRPB PE=1 SV=2	0.420001	-1.13	0.808455	0.047567			4.69	0.78	0.000702	9	5	0	11	6	0	12	6	0	10	6	0	11	6	0	9	5	0	5	4	0	6	4	0	8	6	0	6	4	0	6	5	0	2	2	0	22.86	26.9
CDK2_HUMAN	P24941	Cyclin-dependent kinase 2 OS=Homo sapiens GN=CDK2 PE=1 SV=2	0.626668	-1.12333	0.65011	0.0389197			3.57	0.69	0.005862	14	9	8	11	9	7	12	10	9	11	8	6	11	9	7	12	9	7	11	7	5	10	6	4	12	7	6	12	7	6	15	11	9	3	2	0	22.87	26.09
PSA1_HUMAN	P25786	Proteasome subunit alpha type-1 OS=Homo sapiens GN=PSMA1 PE=1 SV=1	0.763334	-1.65333	0.724475	0.0455314			3.73	0.81	0.011782	9	6	6	10	8	8	9	7	7	9	7	7	10	7	7	12	8	8	10	5	5	14	8	8	9	6	6	10	7	7	14	9	9	4	4	4	22.36	27.01
TCPD_HUMAN	P50991	T-complex protein 1 subunit delta OS=Homo sapiens GN=CCT4 PE=1 SV=4	0.403334	-1.04333	0.781282	0.0262294			4.68	0.79	0.007492	13	11	11	15	13	13	12	9	9	12	10	10	11	10	10	14	12	12	13	10	10	16	12	12	22	12	12	14	11	11	18	12	12	10	9	9	22.19	25.57
SYRC_HUMAN	P54136	Arginine--tRNA ligase, cytoplasmic OS=Homo sapiens GN=RARS PE=1 SV=2	0.633334	0.366667	0.482093	0.393994			3.92	0.75	0.001956	23	20	20	17	16	16	15	13	13	20	17	17	15	14	14	15	15	15	45	30	30	31	27	27	33	25	25	33	23	23	33	25	25	14	14	14	23.37	25.03
SYK_HUMAN	Q15046	Lysine--tRNA ligase OS=Homo sapiens GN=KARS PE=1 SV=3	0.39	0.386667	0.677	0.193637			5.07	0.8	0.004288	16	13	13	12	10	10	12	9	9	13	11	11	16	14	14	15	13	13	44	20	20	37	27	27	36	27	27	28	21	21	31	22	22	13	12	12	23.45	25.6
YBOX1_HUMAN	P67809	Nuclease-sensitive element-binding protein 1 OS=Homo sapiens GN=YBX1 PE=1 SV=3	0.82	-1.39	0.547243	0.0278231			6.97	0.81	0.019799	12	8	4	18	10	6	20	9	6	11	7	3	11	8	4	13	8	5	8	7	2	8	7	2	12	9	4	11	9	5	7	5	2	7	6	2	23.56	26.18
PTBP1_HUMAN	P26599	Polypyrimidine tract-binding protein 1 OS=Homo sapiens GN=PTBP1 PE=1 SV=1	0.153334	-0.91	0.90946	0.0304497			5.29	0.78	0.014988	9	6	5	8	7	5	10	5	3	10	7	5	8	5	4	9	7	5	11	6	5	15	9	6	14	8	6	12	8	6	16	10	7	6	6	4	23.04	26
EIF3F_HUMAN	O00303	Eukaryotic translation initiation factor 3 subunit F OS=Homo sapiens GN=EIF3F PE=1 SV=1	0.0499986	-0.93	0.973532	0.0196231			4.19	0.78	0.008674	6	6	6	7	7	7	13	11	11	10	8	8	7	5	5	15	13	13	8	7	7	11	10	10	12	11	11	10	7	7	11	9	9	6	6	6	22.71	25.98
TBAL3_HUMAN	A6NHL2	Tubulin alpha chain-like 3 OS=Homo sapiens GN=TUBAL3 PE=1 SV=2	0.63	-0.736667	0.671295	0.0282926			4.01	0.56	0.031775	4	3	0	6	4	0	9	2	0	5	2	0	7	2	0	8	4	0	6	4	0	8	5	0	7	5	0	7	4	0	8	3	0	5	3	0	23.6	26.88
PSB1_HUMAN	P20618	Proteasome subunit beta type-1 OS=Homo sapiens GN=PSMB1 PE=1 SV=2	0.403333	-1.52333	0.796117	0.0443779			4.85	0.79	0.003226	8	6	6	8	8	8	10	7	7	8	7	7	7	6	6	11	8	8	7	7	7	10	7	7	9	6	6	10	8	8	10	8	8	3	3	3	22.6	25.81
RL22L_HUMAN	Q6P5R6	60S ribosomal protein L22-like 1 OS=Homo sapiens GN=RPL22L1 PE=1 SV=2	-0.5	-1.96667	0.62859	0.00978488			2.09	0.37	0.007013	2	2	0	1	1	0	1	1	0	2	1	0	2	1	0	2	2	0	2	1	0	2	1	0	1	1	0	1	1	0	2	1	0	1	1	0	22.54	24.16
PSA4_HUMAN	P25789	Proteasome subunit alpha type-4 OS=Homo sapiens GN=PSMA4 PE=1 SV=1	0.506667	-1.37	0.718588	0.0433979			3.88	0.63	0.001125	6	6	6	7	7	7	5	5	5	4	4	4	4	4	4	5	5	5	4	4	4	6	5	5	5	4	4	5	5	5	6	5	5	2	2	2	22.76	25.64
HNRCL_HUMAN	O60812	Heterogeneous nuclear ribonucleoprotein C-like 1 OS=Homo sapiens GN=HNRNPCL1 PE=1 SV=1	0.623333	-0.9	0.73737	0.026951			3.53	0.71	0.002557	14	7	0	15	7	0	8	6	0	11	7	0	12	7	0	17	7	0	9	6	0	7	5	0	10	7	0	8	6	0	13	7	0	7	6	0	23.32	27.26
ROA3_HUMAN	P51991	Heterogeneous nuclear ribonucleoprotein A3 OS=Homo sapiens GN=HNRNPA3 PE=1 SV=2	0.903332	-0.806666	0.473323	0.0371067			4.15	0.83	0.010292	22	14	14	26	13	13	34	17	17	25	12	12	27	11	11	17	11	11	21	11	11	20	13	13	26	14	14	23	13	13	28	16	16	7	7	7	23.05	26.15
IMDH2_HUMAN	P12268	Inosine-5'-monophosphate dehydrogenase 2 OS=Homo sapiens GN=IMPDH2 PE=1 SV=2	0.763333	-1.04333	0.432053	0.0429688			5.9	0.78	0.005532	14	10	10	6	6	6	9	7	7	8	6	6	7	6	6	9	8	8	11	9	9	19	15	14	18	15	14	17	14	13	23	14	13	8	7	6	22.94	24.3
PCBP1_HUMAN	Q15365	Poly(rC)-binding protein 1 OS=Homo sapiens GN=PCBP1 PE=1 SV=2	0.28	-0.976666	0.810282	0.0260733			5.14	0.75	0.006353	9	6	5	7	4	3	6	3	3	9	4	3	6	3	3	9	6	4	8	4	3	8	5	3	14	6	3	12	6	4	9	5	3	8	6	4	22.69	24.77
RTCB_HUMAN	Q9Y3I0	tRNA-splicing ligase RtcB homolog OS=Homo sapiens GN=C22orf28 PE=1 SV=1	-0.1	-0.833334	0.930708	0.0214928			5.56	0.78	0.015706	8	8	8	9	9	9	12	12	12	13	12	12	10	10	10	12	12	12	16	15	15	16	14	14	20	17	17	12	12	12	20	16	16	9	9	9	22.34	24.88
RU2B_HUMAN	P08579	U2 small nuclear ribonucleoprotein B'' OS=Homo sapiens GN=SNRPB2 PE=1 SV=1	-0.2	-1.59667	0.871473	0.0212821			2.97	0.73	0.038052	5	4	2	3	3	1	5	4	1	4	4	1	6	4	1	4	4	1	4	4	1	3	3	1	5	5	2	4	4	1	5	4	1	2	2	0	22.77	24.98
IF1AX_HUMAN	P47813	Eukaryotic translation initiation factor 1A, X-chromosomal OS=Homo sapiens GN=EIF1AX PE=1 SV=2	0.223333	-2.40667	0.902767	0.0212051			3.99	0.7	0.031846	5	4	0	6	4	0	6	3	0	5	3	0	5	3	0	5	3	0	2	1	0	2	2	0	5	4	0	5	3	0	3	2	0	2	2	0	22.3	26.56
IF1AY_HUMAN	O14602	Eukaryotic translation initiation factor 1A, Y-chromosomal OS=Homo sapiens GN=EIF1AY PE=1 SV=4	0.223333	-2.40667	0.902767	0.0212051			3.99	0.7	0.031846	5	4	0	6	4	0	6	3	0	5	3	0	5	3	0	5	3	0	2	1	0	2	2	0	5	4	0	5	3	0	3	2	0	2	2	0	22.3	26.56
CDO1_HUMAN	Q16878	Cysteine dioxygenase type 1 OS=Homo sapiens GN=CDO1 PE=1 SV=2	1.05002	-1.00667	0.784187	0.00309242			1.71	0.32	0.000774	0	0	0	1	1	1	0	0	0	0	0	0	1	1	1	0	0	0	1	1	1	1	1	1	2	1	1	1	1	1	1	1	1	1	1	1	15.9235	25.05
RUVB1_HUMAN	Q9Y265	RuvB-like 1 OS=Homo sapiens GN=RUVBL1 PE=1 SV=1	0.29	-0.78	0.812046	0.0436666			4.94	0.74	0.007977	10	9	9	9	9	9	11	9	9	12	11	11	11	8	8	12	10	10	15	12	12	19	14	14	20	14	14	15	11	11	19	14	14	7	7	7	22.31	25.08
EIF3E_HUMAN	P60228	Eukaryotic translation initiation factor 3 subunit E OS=Homo sapiens GN=EIF3E PE=1 SV=1	0.0400003	-0.98	0.978016	0.0184708			4.79	0.75	0.004265	10	9	9	11	10	10	10	8	8	13	12	12	14	13	13	14	13	13	14	12	12	20	16	16	21	17	17	19	15	15	20	17	17	12	11	11	22.27	25.72
MSRB3_HUMAN	Q8IXL7	Methionine-R-sulfoxide reductase B3 OS=Homo sapiens GN=MSRB3 PE=1 SV=2	0.293334	-1.19	0.798863	0.015572			3.78	0.69	0.003693	5	5	5	3	3	3	5	4	4	8	5	5	11	6	6	2	2	2	2	2	2	2	2	2	4	3	3	3	3	3	3	3	3	1	1	1	24.32	24.43
SNRPA_HUMAN	P09012	U1 small nuclear ribonucleoprotein A OS=Homo sapiens GN=SNRPA PE=1 SV=3	-0.15	-1.61667	0.908207	0.0113696			5.28	0.8	0.000844	6	5	3	4	4	2	6	5	2	6	6	3	9	6	3	7	6	3	4	4	1	4	4	2	7	7	4	8	7	4	6	5	2	2	2	0	22.81	25.2
C1TC_HUMAN	P11586	C-1-tetrahydrofolate synthase, cytoplasmic OS=Homo sapiens GN=MTHFD1 PE=1 SV=3	0.109999	0.0666669	0.870705	0.81075			5.19	0.77	0.005569	22	17	17	15	12	12	18	14	14	22	18	18	22	19	19	18	16	16	43	31	31	38	29	29	45	31	31	38	26	26	42	28	28	18	16	16	22.94	23.96
RBMX_HUMAN	P38159	RNA-binding motif protein, X chromosome OS=Homo sapiens GN=RBMX PE=1 SV=3	0.296667	-0.993334	0.817103	0.0198344			4.66	0.79	0.000455	15	9	3	12	9	3	15	10	3	12	8	3	11	6	2	17	10	3	20	12	4	21	14	4	22	14	4	19	12	5	22	13	4	10	8	3	22.69	25.54
PSB4_HUMAN	P28070	Proteasome subunit beta type-4 OS=Homo sapiens GN=PSMB4 PE=1 SV=4	0.0466671	-1.64667	0.970543	0.0185461			5.28	0.76	0.03578	4	4	4	4	4	4	6	6	6	5	5	5	6	6	6	5	5	5	3	3	3	6	5	5	4	4	4	4	3	3	6	6	6	2	2	2	21.85	24.78
GDIB_HUMAN	P50395	Rab GDP dissociation inhibitor beta OS=Homo sapiens GN=GDI2 PE=1 SV=2	0.906666	-1.41333	0.495863	0.0453883			4.32	0.7	0.001051	8	7	3	4	4	1	6	6	3	4	4	2	4	4	2	5	5	2	7	7	3	13	11	7	12	9	5	10	9	5	12	12	7	7	7	3	21.62	23.69
ALBU_HUMAN	P02768	Serum albumin OS=Homo sapiens GN=ALB PE=1 SV=2	1.98878	-1.97667	0.296482	0.166408			4.18	0.71	0.047849	2	2	2	1	1	1	1	1	1	3	2	2	3	2	2	0	0	0	5	3	3	5	2	2	5	2	2	7	2	2	7	4	4	4	2	2	19.57	20.14
LIPA4_HUMAN	O75335	Liprin-alpha-4 OS=Homo sapiens GN=PPFIA4 PE=2 SV=2	-0.857348	0.446667	0.265148	0.323579			3.97	0.74	0.02971	0	0	0	0	0	0	0	0	0	0	0	0	1	1	0	0	0	0	5	2	0	7	3	0	7	3	0	4	1	0	5	1	0	2	1	0	15.4724	13.7426
CRKL_HUMAN	P46109	Crk-like protein OS=Homo sapiens GN=CRKL PE=1 SV=1	0.436666	-0.353334	0.727465	0.463998			3.78	0.76	0.007829	15	8	8	2	2	2	14	12	12	11	9	9	14	9	9	1	1	1	21	14	14	18	12	12	18	13	13	15	10	10	22	15	15	7	5	5	22.67	20.46
EIF3I_HUMAN	Q13347	Eukaryotic translation initiation factor 3 subunit I OS=Homo sapiens GN=EIF3I PE=1 SV=1	0.173333	-1.06333	0.913626	0.0247063			6.63	0.78	0.002178	10	8	8	14	10	10	16	10	10	14	9	9	12	6	6	15	10	10	13	6	6	12	9	9	14	10	10	9	6	6	13	8	8	6	4	4	22.74	26.52
CYTB_HUMAN	P04080	Cystatin-B OS=Homo sapiens GN=CSTB PE=1 SV=2	0.676667	-1.48667	0.557146	0.0490341			4.17	0.71	0.000252	5	4	4	6	5	5	3	3	3	5	4	4	6	6	6	5	5	5	4	4	4	6	5	5	5	4	4	5	4	4	5	4	4	2	2	2	23.53	26.06
TCP4_HUMAN	P53999	Activated RNA polymerase II transcriptional coactivator p15 OS=Homo sapiens GN=SUB1 PE=1 SV=3	1.56667	-2.62	0.409621	0.0316614			4.07	0.68	0.013749	8	7	7	8	7	7	7	6	6	5	4	4	4	4	4	8	7	7	2	2	2	5	4	4	4	3	3	6	5	5	7	6	6	2	2	2	23.63	27.11
GFAP_HUMAN	P14136	Glial fibrillary acidic protein OS=Homo sapiens GN=GFAP PE=1 SV=1	0.923333	-4.50444	0.608271	0.0778557			3.63	0.66	0.030146	13	2	0	27	2	0	51	2	0	10	1	0	25	1	0	27	2	0	3	1	0	1	1	0	0	0	0	4	1	0	2	1	0	5	1	0	22.64	27.14
RL29_HUMAN	P47914	60S ribosomal protein L29 OS=Homo sapiens GN=RPL29 PE=1 SV=2	0.456667	-1.11667	0.826086	0.0489604			3.37	0.75	0.014424	3	2	2	5	2	2	6	3	3	5	3	3	4	2	2	6	3	3	5	3	3	5	3	3	6	3	3	3	3	3	7	4	4	1	1	1	22.42	27
TRPV5_HUMAN	Q9NQA5	Transient receptor potential cation channel subfamily V member 5 OS=Homo sapiens GN=TRPV5 PE=1 SV=2	2.72596	-1.12667	0.421513	0.0376637			1.34	0.3	0.13689	2	1	0	2	1	0	2	1	0	0	0	0	2	1	0	1	1	0	2	1	0	3	1	0	1	1	0	2	1	0	2	1	0	1	1	0	22.24	24.78
SYQ_HUMAN	P47897	Glutamine--tRNA ligase OS=Homo sapiens GN=QARS PE=1 SV=1	0.16	0.153333	0.801136	0.412686			4.42	0.75	0.000348	31	29	29	19	19	19	24	21	21	27	27	27	31	28	28	23	21	21	40	27	27	44	32	32	49	34	34	31	24	23	53	33	32	18	18	18	23.51	24.67
CDK9_HUMAN	P50750	Cyclin-dependent kinase 9 OS=Homo sapiens GN=CDK9 PE=1 SV=3	0.363333	-0.883334	0.741987	0.0462432			3.18	0.76	0.008606	3	1	0	4	3	2	8	7	6	7	5	4	4	3	2	4	2	1	9	6	5	8	5	4	8	5	4	8	5	4	8	5	4	2	1	0	22.36	24.43
BLVRB_HUMAN	P30043	Flavin reductase (NADPH) OS=Homo sapiens GN=BLVRB PE=1 SV=3	1.02	-1.95333	0.042865	0.100976			3.22	0.71	0.078075	5	3	3	3	2	2	4	3	3	3	3	3	2	2	2	3	2	2	1	1	1	5	3	3	3	2	2	5	3	3	5	3	3	2	2	2	21.53	21.69
CBR1_HUMAN	P16152	Carbonyl reductase [NADPH] 1 OS=Homo sapiens GN=CBR1 PE=1 SV=3	0.483334	-1.84333	0.745124	0.00663219			4.46	0.79	0.01112	5	4	2	4	4	2	5	5	3	6	5	3	6	5	3	4	4	2	7	4	2	7	5	3	7	6	4	6	5	3	9	7	5	3	3	2	20.82	24.27
XRCC5_HUMAN	P13010	X-ray repair cross-complementing protein 5 OS=Homo sapiens GN=XRCC5 PE=1 SV=3	0.373334	0.51	0.729366	0.115318			6.24	0.77	0.002595	31	21	21	20	16	16	17	13	13	18	14	14	19	13	13	22	18	18	37	23	23	44	28	28	43	27	27	28	17	17	39	23	23	14	12	12	23.56	25.47
UTS2_HUMAN	O95399	Urotensin-2 OS=Homo sapiens GN=UTS2 PE=1 SV=1	7.53948	-2.65803	0.0402966	0.460989			1.8	0.43	0.042959	1	1	1	0	0	0	1	1	1	0	0	0	0	0	0	0	0	0	2	1	1	2	1	1	0	0	0	2	1	1	1	1	1	1	1	1	24.52	17.6611
PTBP3_HUMAN	O95758	Polypyrimidine tract-binding protein 3 OS=Homo sapiens GN=PTBP3 PE=1 SV=2	0.26	-1.01667	0.844727	0.0438267			2.24	0.57	0.008308	3	2	1	2	2	0	3	2	0	3	2	0	3	2	1	3	3	1	3	2	1	6	5	2	4	4	2	4	3	1	5	5	2	2	2	0	21.88	24.97
SYIC_HUMAN	P41252	Isoleucine--tRNA ligase, cytoplasmic OS=Homo sapiens GN=IARS PE=1 SV=2	-0.0400003	0.406667	0.972061	0.127844			4.54	0.76	0.005208	37	24	24	18	17	17	21	19	19	26	22	22	31	26	26	36	30	30	52	33	33	53	38	38	49	34	34	41	30	30	47	33	33	15	15	15	22.08	24.71
TCPG_HUMAN	P49368	T-complex protein 1 subunit gamma OS=Homo sapiens GN=CCT3 PE=1 SV=4	0.216667	-0.913333	0.867796	0.00101583			5.07	0.72	0.002442	10	8	8	11	10	10	10	6	6	11	10	10	11	9	9	11	11	11	21	15	15	20	14	14	31	19	19	19	13	13	25	21	21	10	10	10	22.24	25.29
DNJA1_HUMAN	P31689	DnaJ homolog subfamily A member 1 OS=Homo sapiens GN=DNAJA1 PE=1 SV=2	0.103334	-1.22333	0.937701	0.00585039			4.84	0.82	0.067216	6	4	4	6	4	4	6	4	4	6	4	4	6	4	4	7	5	5	8	4	4	5	4	4	9	7	7	7	6	6	8	7	6	3	3	3	21.99	24.67
PUR6_HUMAN	P22234	Multifunctional protein ADE2 OS=Homo sapiens GN=PAICS PE=1 SV=3	-0.36	-0.903334	0.829801	0.120286			3.48	0.7	0.032608	3	3	3	3	2	2	1	1	1	3	3	3	4	4	4	6	5	5	5	5	5	11	10	10	8	8	8	5	5	5	7	7	7	6	6	6	19.55	22.44
PSME2_HUMAN	Q9UL46	Proteasome activator complex subunit 2 OS=Homo sapiens GN=PSME2 PE=1 SV=4	-0.476666	-1.34667	0.590563	0.137216			3.53	0.7	0.005652	5	3	3	1	1	1	5	4	4	5	3	3	4	3	3	4	3	3	3	3	3	5	3	3	4	3	3	6	4	4	5	3	3	3	3	3	21.2	20.52
COR1C_HUMAN	Q9ULV4	Coronin-1C OS=Homo sapiens GN=CORO1C PE=1 SV=1	-0.143333	-2.02	0.933646	0.00977838			4.73	0.81	0.018547	10	7	7	15	8	8	14	5	5	11	6	6	14	6	6	15	9	9	5	4	4	4	4	4	3	3	3	6	5	5	7	5	5	4	4	4	23.72	27.59
HNRH3_HUMAN	P31942	Heterogeneous nuclear ribonucleoprotein H3 OS=Homo sapiens GN=HNRNPH3 PE=1 SV=2	0.15	-1.28	0.907646	0.0267369			4.29	0.78	0.003211	6	5	5	8	5	5	6	6	6	6	5	5	7	5	5	7	5	5	7	6	6	9	4	4	9	5	5	9	5	5	11	6	6	2	2	2	21.9	24.31
PTRF_HUMAN	Q6NZI2	Polymerase I and transcript release factor OS=Homo sapiens GN=PTRF PE=1 SV=1	0.276667	-0.296666	0.818251	0.457073			4.53	0.72	0.003254	4	3	3	3	2	2	3	3	3	3	3	3	4	4	4	3	2	2	13	9	9	14	9	9	14	9	9	9	7	7	11	7	7	5	5	5	20.22	23.26
MYL6_HUMAN	P60660	Myosin light polypeptide 6 OS=Homo sapiens GN=MYL6 PE=1 SV=2	0.206667	-1.11667	0.91435	0.0326561			3.79	0.76	0.001892	5	4	3	7	6	5	7	5	5	5	5	4	7	5	4	9	6	5	4	4	3	2	2	1	3	3	2	2	2	1	3	3	2	1	1	0	23.53	27.6
GDIA_HUMAN	P31150	Rab GDP dissociation inhibitor alpha OS=Homo sapiens GN=GDI1 PE=1 SV=2	0.87	-1.24667	0.510858	0.0449904			2.8	0.69	0.001051	5	4	0	3	3	0	3	3	0	2	2	0	2	2	0	3	3	0	5	5	1	7	6	2	8	6	2	5	5	1	5	5	0	4	4	0	21.22	23.44
TCPW_HUMAN	Q92526	T-complex protein 1 subunit zeta-2 OS=Homo sapiens GN=CCT6B PE=1 SV=5	0.55	-1.18	0.675471	0.0404177			2.64	0.65	0.001791	2	2	0	3	3	0	3	3	0	1	1	0	2	2	0	2	2	0	2	2	0	3	3	0	4	3	0	4	3	0	2	2	0	3	3	0	20.38	23.36
F10A1_HUMAN	P50502	Hsc70-interacting protein OS=Homo sapiens GN=ST13 PE=1 SV=2	0.723333	-1.9	0.662023	0.0162568			3.57	0.72	0.024436	2	2	0	2	2	0	3	3	0	2	2	0	2	2	0	4	4	0	3	3	0	5	5	0	3	3	0	6	6	0	5	5	0	4	4	0	20.41	23.53
BAG2_HUMAN	O95816	BAG family molecular chaperone regulator 2 OS=Homo sapiens GN=BAG2 PE=1 SV=1	0.55	-2.16	0.729883	0.0191539			4.47	0.71	0.01308	3	3	3	7	6	6	3	3	3	3	3	3	4	4	4	5	4	4	2	2	2	3	3	3	2	2	2	3	3	3	4	4	4	2	2	2	21.81	26.01
ST134_HUMAN	Q8IZP2	Putative protein FAM10A4 OS=Homo sapiens GN=ST13P4 PE=5 SV=1	0.77	-1.80333	0.634489	0.0108725			3.57	0.72	0.030863	2	2	0	2	2	0	3	3	0	2	2	0	2	2	0	3	3	0	3	3	0	3	3	0	3	3	0	4	4	0	4	4	0	3	3	0	20.6	23.71
RFC2_HUMAN	P35250	Replication factor C subunit 2 OS=Homo sapiens GN=RFC2 PE=1 SV=3	-0.513334	-0.503334	0.648699	0.0627561			3.11	0.74	0.011016	8	5	5	1	1	1	8	8	8	6	6	6	6	6	6	5	4	4	8	8	8	10	10	10	12	11	11	8	8	8	8	8	8	4	4	4	20.55	20.56
FHL2_HUMAN	Q14192	Four and a half LIM domains protein 2 OS=Homo sapiens GN=FHL2 PE=1 SV=3	0.0966663	-1.15667	0.9379	0.0167989			3.53	0.64	0.017616	6	3	3	5	4	4	6	4	4	6	3	3	6	4	4	6	3	3	7	3	3	6	3	3	6	3	3	7	3	3	8	3	3	2	2	2	21.94	24.42
KHDR1_HUMAN	Q07666	KH domain-containing, RNA-binding, signal transduction-associated protein 1 OS=Homo sapiens GN=KHDRBS1 PE=1 SV=1	0.38	-1.01667	0.756735	0.0227081			3.99	0.74	0.001989	7	5	3	7	6	4	8	5	3	3	2	1	7	5	3	7	6	4	7	5	3	4	3	2	8	4	3	7	5	4	8	5	3	4	4	3	22.49	25
PSB7_HUMAN	Q99436	Proteasome subunit beta type-7 OS=Homo sapiens GN=PSMB7 PE=1 SV=1	0.993333	-2.53	0.443572	0.0127671			3.01	0.64	0.000374	4	4	4	3	3	3	4	3	3	3	2	2	3	2	2	3	2	2	2	2	2	3	2	2	1	1	1	3	3	3	6	5	5	1	1	1	21.22	23.6
NOP58_HUMAN	Q9Y2X3	Nucleolar protein 58 OS=Homo sapiens GN=NOP58 PE=1 SV=1	0.343333	-1.15333	0.845693	0.0318781			5.86	0.82	0.000207	9	7	7	18	15	15	15	10	10	15	12	12	12	9	9	18	14	14	13	11	11	9	8	8	20	10	10	13	11	11	11	8	8	6	6	6	21.82	25.97
CAPZB_HUMAN	P47756	F-actin-capping protein subunit beta OS=Homo sapiens GN=CAPZB PE=1 SV=4	0.62	-1.07333	0.617854	0.0348675			5.29	0.77	0.007892	9	9	9	10	9	9	10	8	8	8	6	6	8	6	6	10	8	8	8	6	6	9	6	6	8	6	6	6	5	5	10	8	8	3	3	3	22.69	25.23
PSA5_HUMAN	P28066	Proteasome subunit alpha type-5 OS=Homo sapiens GN=PSMA5 PE=1 SV=3	0.84	-1.71	0.601535	0.0268008			4.59	0.71	0.016315	7	6	6	9	9	9	8	7	7	5	4	4	6	5	5	8	6	6	5	4	4	5	4	4	5	4	4	5	4	4	7	6	6	2	2	2	22.59	26.15
PRS7_HUMAN	P35998	26S protease regulatory subunit 7 OS=Homo sapiens GN=PSMC2 PE=1 SV=3	1.33667	-1.73	0.188759	0.00303413			3.96	0.75	0.008967	8	8	8	4	4	4	3	3	3	9	9	9	5	5	5	4	4	4	12	12	12	9	9	9	11	10	10	13	13	13	18	15	15	6	6	6	22.05	23.2
OTUB1_HUMAN	Q96FW1	Ubiquitin thioesterase OTUB1 OS=Homo sapiens GN=OTUB1 PE=1 SV=2	0.686667	-2.56667	0.68419	0.0475295			2.51	0.62	0.010832	4	4	4	5	4	4	3	2	2	3	3	3	3	3	3	5	4	4	1	1	1	2	2	2	2	2	2	4	3	3	5	4	4	2	2	2	20.34	23.84
PSME3_HUMAN	P61289	Proteasome activator complex subunit 3 OS=Homo sapiens GN=PSME3 PE=1 SV=1	1.14667	-2	0.421838	0.0478459			3.77	0.76	0.000926	6	6	6	8	7	7	6	5	5	3	3	3	7	5	5	6	5	5	2	2	2	5	4	4	5	4	4	7	6	6	6	6	6	3	3	3	20.57	24.2
P5CR3_HUMAN	Q53H96	Pyrroline-5-carboxylate reductase 3 OS=Homo sapiens GN=PYCRL PE=1 SV=2	0.236666	-1.13	0.795881	0.0248149			3.85	0.68	0.004818	5	4	4	3	3	3	5	4	4	5	4	4	5	4	4	4	3	3	6	5	5	5	4	4	6	5	5	6	5	5	6	5	5	2	2	2	21.22	23.25
ARF4_HUMAN	P18085	ADP-ribosylation factor 4 OS=Homo sapiens GN=ARF4 PE=1 SV=3	0.843334	-2.72	0.644066	0.0202577			3.57	0.66	0.020791	2	2	2	7	7	5	2	2	2	2	2	2	2	2	2	4	4	3	1	1	1	1	1	0	1	1	1	3	3	2	2	2	1	2	2	0	21.14	25.22
EI2BB_HUMAN	P49770	Translation initiation factor eIF-2B subunit beta OS=Homo sapiens GN=EIF2B2 PE=1 SV=3	0.449999	-0.643334	0.440835	0.0667538			3.88	0.73	0.001709	7	7	7	3	3	3	7	7	7	5	5	5	7	6	6	3	3	3	9	8	8	9	8	8	10	9	9	8	8	8	9	8	8	4	4	4	20.88	22.5
SYMC_HUMAN	P56192	Methionine--tRNA ligase, cytoplasmic OS=Homo sapiens GN=MARS PE=1 SV=2	0.63	0.243334	0.448825	0.535618			4.64	0.76	0.000982	19	16	16	12	12	12	10	9	9	12	10	10	17	14	14	7	7	7	23	18	18	27	18	18	32	20	20	21	14	14	23	19	19	9	8	8	22.23	23.98
NMT1_HUMAN	P30419	Glycylpeptide N-tetradecanoyltransferase 1 OS=Homo sapiens GN=NMT1 PE=1 SV=2	0.283333	-0.886666	0.846045	0.00034205			4.7	0.76	0.010349	4	4	3	7	6	5	6	6	5	8	7	5	4	4	3	5	4	2	5	4	3	6	5	4	11	6	5	6	5	4	7	4	3	3	3	2	21.23	24.37
AURKA_HUMAN	O14965	Aurora kinase A OS=Homo sapiens GN=AURKA PE=1 SV=2	0.776667	-0.826667	0.594973	0.0241153			4.44	0.73	0.009351	9	8	7	6	6	6	6	6	5	10	8	7	8	7	5	4	4	4	6	5	4	8	6	5	7	7	7	7	7	6	10	7	7	5	5	4	22.65	25.57
PRS4_HUMAN	P62191	26S protease regulatory subunit 4 OS=Homo sapiens GN=PSMC1 PE=1 SV=1	0.403334	-0.91	0.706315	0.0703979			4.29	0.7	0.041934	8	7	7	4	4	4	7	7	7	8	8	8	3	3	3	8	7	7	9	7	7	9	8	8	11	8	8	11	7	7	13	9	9	5	5	5	21.19	21.19
C2C2L_HUMAN	O14523	C2 domain-containing protein 2-like OS=Homo sapiens GN=C2CD2L PE=1 SV=3	3.52314	-0.0466665	0.114473	0.933736			1.51	0.3	0.024796	4	1	1	1	1	1	3	1	1	2	1	1	1	1	1	0	0	0	5	1	1	4	1	1	4	1	1	4	1	1	7	1	1	4	1	1	22.37	21.12
CDC37_HUMAN	Q16543	Hsp90 co-chaperone Cdc37 OS=Homo sapiens GN=CDC37 PE=1 SV=1	0.199999	-0.0866655	0.879067	0.722243			4.43	0.76	0.015639	4	4	4	4	4	4	3	3	3	4	4	4	2	2	2	3	3	3	9	8	8	12	10	10	13	11	11	7	7	7	7	7	7	3	3	3	19.88	22.32
ACL6A_HUMAN	O96019	Actin-like protein 6A OS=Homo sapiens GN=ACTL6A PE=1 SV=1	1.14162	-1.07	0.466006	0.229453			5.12	0.76	0.04913	3	3	3	1	1	1	3	3	3	3	3	3	3	3	3	0	0	0	6	6	5	6	5	5	4	3	3	3	3	3	8	6	6	3	3	3	19.74	19.15
PRS10_HUMAN	P62333	26S protease regulatory subunit 10B OS=Homo sapiens GN=PSMC6 PE=1 SV=1	-0.425317	-0.996667	0.815438	0.0606883			3.86	0.74	0.023334	0	0	0	1	1	1	1	1	1	1	1	1	1	1	1	1	1	1	9	8	8	12	11	11	12	9	9	10	9	9	12	11	11	5	5	5	13.924	19.15
HAT1_HUMAN	O14929	Histone acetyltransferase type B catalytic subunit OS=Homo sapiens GN=HAT1 PE=1 SV=1	0.0866667	-1.51667	0.960864	0.0081387			4	0.74	0.028509	3	3	3	1	1	1	1	1	1	2	2	2	2	2	2	4	4	4	4	4	4	4	4	4	3	3	3	3	3	3	5	5	5	3	3	3	20.32	21.9
GOGA4_HUMAN	Q13439	Golgin subfamily A member 4 OS=Homo sapiens GN=GOLGA4 PE=1 SV=1	0.230001	0.23	0.307439	0.481093			4.75	0.77	0.003087	66	56	56	25	24	24	59	52	52	46	43	43	54	49	49	27	26	26	65	59	59	80	66	66	100	85	85	56	52	52	69	58	58	25	24	24	21.37	21.41
PYRG1_HUMAN	P17812	CTP synthase 1 OS=Homo sapiens GN=CTPS1 PE=1 SV=2	0.606667	0.419999	0.424731	0.221239			3.94	0.74	0.021154	4	4	3	4	4	3	4	4	3	4	4	3	4	4	3	2	2	2	17	13	12	12	12	11	12	11	10	8	8	7	11	10	9	6	6	5	21.23	22.86
CN166_HUMAN	Q9Y224	UPF0568 protein C14orf166 OS=Homo sapiens GN=C14orf166 PE=1 SV=1	0.583333	-1.29	0.716817	0.0360022			3.88	0.75	0.002279	10	6	6	15	9	9	16	9	9	8	7	7	9	6	6	16	10	10	5	4	4	4	4	4	8	8	8	7	5	5	9	8	8	1	1	1	21.81	24.99
EDF1_HUMAN	O60869	Endothelial differentiation-related factor 1 OS=Homo sapiens GN=EDF1 PE=1 SV=1	0.663333	-6.37072	0.71353	0.0946667			3.87	0.71	0.066078	4	3	3	5	3	3	5	3	3	3	3	3	3	3	3	5	3	3	0	0	0	0	0	0	2	1	1	1	1	1	0	0	0	1	1	1	20.8	25.01
F10A5_HUMAN	Q8NFI4	Putative protein FAM10A5 OS=Homo sapiens GN=ST13P5 PE=5 SV=1	0.956666	-1.96333	0.60758	0.0160268			2.97	0.72	0.024436	1	1	0	1	1	0	2	2	0	1	1	0	1	1	0	3	3	0	2	2	0	4	4	0	2	2	0	5	5	0	4	4	0	3	3	0	19.56	22.63
SAR1B_HUMAN	Q9Y6B6	GTP-binding protein SAR1b OS=Homo sapiens GN=SAR1B PE=1 SV=1	0.973334	-1.68	0.588349	0.027041			3.07	0.6	0.028881	4	4	1	3	3	1	4	4	1	4	4	1	5	4	1	3	3	1	3	3	1	4	4	1	4	4	1	4	4	1	4	4	1	2	2	1	21.03	24.75
RS21_HUMAN	P63220	40S ribosomal protein S21 OS=Homo sapiens GN=RPS21 PE=1 SV=1	0.203333	-1.35333	0.914045	0.0219509			6.15	0.8	0.01423	6	5	5	8	6	6	8	6	6	6	5	5	5	3	3	9	6	6	2	2	2	3	3	3	4	3	3	4	3	3	4	3	3	1	1	1	23.46	26.96
KHDR3_HUMAN	O75525	KH domain-containing, RNA-binding, signal transduction-associated protein 3 OS=Homo sapiens GN=KHDRBS3 PE=1 SV=1	0.219999	-1.30667	0.843792	0.0281619			1.73	0.49	0.036609	2	2	0	2	2	0	3	2	0	1	1	0	2	2	0	2	2	0	2	2	0	1	1	0	1	1	0	2	1	0	3	2	0	1	1	0	21.89	24.21
CHRD1_HUMAN	Q9UHD1	Cysteine and histidine-rich domain-containing protein 1 OS=Homo sapiens GN=CHORDC1 PE=1 SV=2	0.99	-0.973333	0.480966	0.0400681			4.79	0.73	0.001507	10	5	5	9	5	5	10	7	7	8	5	5	8	5	5	10	4	4	7	5	5	10	6	6	6	4	4	6	4	4	11	8	8	4	3	3	20.52	23.84
XP32_HUMAN	Q5T750	Skin-specific protein 32 OS=Homo sapiens GN=XP32 PE=1 SV=1	0	-1.93667	1	0.125441			1.95	0.56	0.089424	0	0	0	0	0	0	0	0	0	0	0	0	0	0	0	0	0	0	3	1	1	1	1	1	2	1	1	1	1	1	3	1	1	1	1	1	15.1322	16.0208
SF3B2_HUMAN	Q13435	Splicing factor 3B subunit 2 OS=Homo sapiens GN=SF3B2 PE=1 SV=2	-0.846667	-0.366667	0.237515	0.243863			4.39	0.73	0.000311	17	17	17	13	13	13	12	10	10	23	16	16	11	10	10	18	15	15	19	15	15	19	14	14	19	15	15	16	15	15	17	16	16	5	5	5	24.73	24.42
METK2_HUMAN	P31153	S-adenosylmethionine synthase isoform type-2 OS=Homo sapiens GN=MAT2A PE=1 SV=1	0.386666	-0.38	0.594713	0.436813			3.43	0.76	0.00311	4	4	3	1	1	1	2	2	2	5	5	3	3	3	2	2	2	2	7	7	6	8	8	7	9	9	8	8	8	7	9	9	9	2	2	2	21.84	22.13
6PGL_HUMAN	O95336	6-phosphogluconolactonase OS=Homo sapiens GN=PGLS PE=1 SV=2	0.12	-1.38667	0.879957	0.0458481			2.67	0.72	0.005684	4	4	4	1	1	1	5	5	5	3	3	3	4	4	4	3	3	3	4	4	4	7	6	6	4	4	4	5	4	4	6	5	5	2	2	2	20.42	21.32
CSRP2_HUMAN	Q16527	Cysteine and glycine-rich protein 2 OS=Homo sapiens GN=CSRP2 PE=1 SV=3	-0.373334	-0.983334	0.808365	0.0312058			3.4	0.76	0.008678	5	5	5	2	2	2	1	1	1	3	3	3	3	3	3	4	4	4	5	4	4	4	4	4	6	5	5	5	5	5	5	5	5	3	3	3	21.01	21.6
EBP2_HUMAN	Q99848	Probable rRNA-processing protein EBP2 OS=Homo sapiens GN=EBNA1BP2 PE=1 SV=2	-0.388184	-0.393333	0.857864	0.402812			2.89	0.63	0.030402	1	1	1	0	0	0	5	5	5	3	3	3	1	1	1	1	1	1	5	5	5	5	5	5	4	4	4	4	4	4	4	4	4	2	2	2	19.03	16.1455
RMXL1_HUMAN	Q96E39	RNA binding motif protein, X-linked-like-1 OS=Homo sapiens GN=RBMXL1 PE=1 SV=1	0.41	-0.89	0.755295	0.0138257			4.66	0.79	0.001005	9	5	0	9	8	2	9	6	0	5	4	0	8	4	0	11	7	1	11	7	0	11	8	0	13	9	0	10	7	1	12	9	1	5	4	0	21.44	24.24
HDAC6_HUMAN	Q9UBN7	Histone deacetylase 6 OS=Homo sapiens GN=HDAC6 PE=1 SV=2	-0.936667	-0.226667	0.189358	0.49448			4.45	0.74	0.025421	9	8	8	2	2	2	6	6	6	8	8	8	9	9	9	6	6	6	7	6	6	8	7	7	8	7	7	8	8	8	7	7	7	5	5	5	21.46	19.97
KHDR2_HUMAN	Q5VWX1	KH domain-containing, RNA-binding, signal transduction-associated protein 2 OS=Homo sapiens GN=KHDRBS2 PE=1 SV=1	0.21	-1.30333	0.850772	0.0286709			1.73	0.49	0.036609	2	2	0	2	2	0	3	2	0	1	1	0	2	2	0	2	2	0	2	2	0	1	1	0	1	1	0	2	1	0	3	2	0	1	1	0	21.74	24.06
DRG1_HUMAN	Q9Y295	Developmentally-regulated GTP-binding protein 1 OS=Homo sapiens GN=DRG1 PE=1 SV=1	0.563334	-0.153333	0.602919	0.805239			5.69	0.78	0.007601	6	6	6	6	6	6	15	12	12	10	8	8	5	3	3	7	6	6	14	11	11	17	13	13	16	12	12	12	11	11	18	13	13	2	2	2	21.24	23.37
PCH2_HUMAN	Q15645	Pachytene checkpoint protein 2 homolog OS=Homo sapiens GN=TRIP13 PE=1 SV=2	1.28667	-1.24333	0.3968	0.00685305			3.88	0.72	0.017145	4	4	4	6	6	6	3	3	3	2	2	2	3	3	3	4	4	4	6	6	6	6	6	6	6	6	6	6	6	6	8	7	7	3	3	3	20.55	23.55
H1T_HUMAN	P22492	Histone H1t OS=Homo sapiens GN=HIST1H1T PE=1 SV=4	-3.39693	-5.91692	0.136685	0.0570363			3.63	0.65	0.05903	1	1	0	0	0	0	1	1	0	1	1	0	1	1	0	2	2	0	0	0	0	0	0	0	0	0	0	2	2	0	0	0	0	1	1	0	18.89	16.8192
SF3A3_HUMAN	Q12874	Splicing factor 3A subunit 3 OS=Homo sapiens GN=SF3A3 PE=1 SV=1	0.016667	-0.866667	0.978896	0.093206	Q12874		3.49	0.74	0.004288	6	6	6	2	2	2	5	5	5	5	5	5	4	4	4	3	3	3	9	9	9	7	7	7	9	7	7	8	8	8	8	7	7	3	3	3	21.09	22.02
IAH1_HUMAN	Q2TAA2	Isoamyl acetate-hydrolyzing esterase 1 homolog OS=Homo sapiens GN=IAH1 PE=1 SV=1	1.5622	-0.386667	0.182878	0.102273			3.5	0.75	0.111483	1	1	1	1	1	1	2	2	2	0	0	0	1	1	1	1	1	1	3	3	3	3	3	3	4	4	4	2	2	2	4	4	4	2	2	2	19.58	20.5
SPB8_HUMAN	P50452	Serpin B8 OS=Homo sapiens GN=SERPINB8 PE=1 SV=2	-0.0633335	-0.796667	0.92163	0.136393			2.63	0.63	0.013263	1	1	0	1	1	0	1	1	0	1	1	0	1	1	0	1	1	0	2	2	1	1	1	0	1	1	0	1	1	0	1	1	0	1	1	0	19.39	20.26
PSMD6_HUMAN	Q15008	26S proteasome non-ATPase regulatory subunit 6 OS=Homo sapiens GN=PSMD6 PE=1 SV=1	-1.43679	-0.683333	0.465633	0.0599461			3.66	0.65	0.00027	3	3	3	0	0	0	3	3	3	2	2	2	3	3	3	1	1	1	9	9	9	10	10	10	10	9	9	8	7	7	10	9	9	4	4	4	19.12	15.4796
EXOS7_HUMAN	Q15024	Exosome complex component RRP42 OS=Homo sapiens GN=EXOSC7 PE=1 SV=3	0.443333	-1.55333	0.74003	0.0208092			3.48	0.73	0.03006	4	4	4	5	3	3	6	5	5	4	4	4	5	5	5	6	5	5	3	3	3	6	5	5	6	4	4	5	5	5	5	5	5	2	2	2	20.65	23.34
PSMD8_HUMAN	P48556	26S proteasome non-ATPase regulatory subunit 8 OS=Homo sapiens GN=PSMD8 PE=1 SV=2	0.33	-1.79667	0.828535	0.0371973			4.59	0.78	0.007882	3	3	3	4	4	4	5	5	5	4	4	4	4	4	4	4	4	4	2	2	2	3	3	3	5	4	4	6	5	5	5	4	4	1	1	1	19.85	23.63
TRXR1_HUMAN	Q16881	Thioredoxin reductase 1, cytoplasmic OS=Homo sapiens GN=TXNRD1 PE=1 SV=3	-0.35	-0.0300001	0.805906	0.92804			6.02	0.75	0.001397	6	5	5	6	5	5	3	3	3	5	4	4	5	5	5	7	6	6	11	9	9	13	10	10	13	10	10	11	10	10	13	11	11	6	4	4	20.56	22.43
AHNK_HUMAN	Q09666	Neuroblast differentiation-associated protein AHNAK OS=Homo sapiens GN=AHNAK PE=1 SV=2	0.313334	0.946667	0.776153	0.0193354			5.5	0.8	0.0003	136	118	118	135	114	114	164	129	129	112	102	102	120	105	105	106	90	90	191	157	157	194	161	161	193	151	151	92	78	78	119	104	104	68	58	58	20.78	23.73
SYYC_HUMAN	P54577	Tyrosine--tRNA ligase, cytoplasmic OS=Homo sapiens GN=YARS PE=1 SV=4	-0.0266666	-1.93	0.987696	0.00295743			2.82	0.71	0.000613	2	2	2	4	4	4	1	1	1	2	2	2	2	2	2	4	4	4	5	5	5	6	6	6	13	11	11	12	11	11	11	11	11	6	6	6	18.77	22.19
DJC10_HUMAN	Q8IXB1	DnaJ homolog subfamily C member 10 OS=Homo sapiens GN=DNAJC10 PE=1 SV=2	0.286667	0.333333	0.246434	0.107135			4.27	0.73	0.003638	11	9	9	3	3	3	6	6	6	9	8	8	6	6	6	2	2	2	18	13	13	18	15	15	22	16	16	10	8	8	13	11	11	5	5	5	21.22	21.42
SIR5_HUMAN	Q9NXA8	NAD-dependent protein deacylase sirtuin-5, mitochondrial OS=Homo sapiens GN=SIRT5 PE=1 SV=2	-0.0933342	-0.656667	0.885242	0.15371			4.3	0.76	0.000758	5	5	5	4	4	4	3	3	3	5	5	5	6	6	6	4	4	4	7	6	6	10	8	8	13	11	11	8	8	8	12	11	11	2	2	2	20.39	21.85
PPIH_HUMAN	O43447	Peptidyl-prolyl cis-trans isomerase H OS=Homo sapiens GN=PPIH PE=1 SV=1	0.550001	-1.82333	0.504535	0.00697548			2.42	0.64	0.003233	4	4	4	4	4	4	4	3	3	3	3	3	4	3	3	3	2	2	3	3	3	2	2	2	3	3	3	4	3	3	4	3	3	1	1	1	21.1	22.32
SYFA_HUMAN	Q9Y285	Phenylalanine--tRNA ligase alpha subunit OS=Homo sapiens GN=FARSA PE=1 SV=3	-0.106666	-1.41333	0.957054	0.0370865			3.26	0.66	0.019513	2	2	2	3	3	3	3	3	3	3	3	3	2	2	2	3	3	3	3	3	3	4	4	4	4	4	4	5	5	5	4	4	4	3	3	3	18.26	22.23
ARHG2_HUMAN	Q92974	Rho guanine nucleotide exchange factor 2 OS=Homo sapiens GN=ARHGEF2 PE=1 SV=4	1.96	-1.67333	0.384059	0.0137705	Q92974		4.21	0.72	0.019066	18	16	16	6	6	6	16	15	15	12	11	11	11	10	10	6	6	6	10	10	10	7	7	7	12	12	12	14	13	13	16	15	15	6	6	6	24.66	21.24
WDR82_HUMAN	Q6UXN9	WD repeat-containing protein 82 OS=Homo sapiens GN=WDR82 PE=1 SV=1	0.473333	-2.02	0.656345	0.00573141			3.21	0.69	0.011227	8	7	7	4	4	4	6	6	6	6	5	5	7	7	7	5	5	5	4	4	4	5	3	3	6	4	4	8	6	6	11	9	9	2	2	2	21.05	23.45
SMC1A_HUMAN	Q14683	Structural maintenance of chromosomes protein 1A OS=Homo sapiens GN=SMC1A PE=1 SV=2	-0.156666	0.0266666	0.882066	0.930179			3.93	0.78	0.000496	38	30	30	17	15	15	22	20	20	26	24	24	26	23	23	36	32	32	38	33	33	27	24	24	43	34	34	28	26	26	30	25	25	10	10	10	21.24	22.69
PPP6_HUMAN	O00743	Serine/threonine-protein phosphatase 6 catalytic subunit OS=Homo sapiens GN=PPP6C PE=1 SV=1	0.616667	-3.2	0.666859	0.044511			2.54	0.59	0.020746	2	2	2	3	3	3	3	3	3	2	2	2	3	3	3	2	2	2	2	2	2	3	3	3	1	1	1	5	5	5	5	5	5	2	2	2	18.69	21.72
SRP09_HUMAN	P49458	Signal recognition particle 9 kDa protein OS=Homo sapiens GN=SRP9 PE=1 SV=2	0.616667	-2.38	0.717648	0.00681752			2.47	0.47	0.003745	3	2	2	1	1	1	2	2	2	2	2	2	2	1	1	2	2	2	3	2	2	2	1	1	3	2	2	4	2	2	5	3	3	2	1	1	19.91	23.29
UGPA_HUMAN	Q16851	UTP--glucose-1-phosphate uridylyltransferase OS=Homo sapiens GN=UGP2 PE=1 SV=5	0.536667	-1.85	0.768568	0.0886061			3.75	0.64	0.000369	1	1	1	1	1	1	1	1	1	1	1	1	1	1	1	2	2	2	2	2	2	8	8	8	8	8	8	6	6	6	8	8	8	2	2	2	17.41	19.06
RECQ1_HUMAN	P46063	ATP-dependent DNA helicase Q1 OS=Homo sapiens GN=RECQL PE=1 SV=3	0.326667	1.44	0.738842	0.0170884			5.74	0.74	0.004279	13	12	12	13	11	11	13	11	11	10	9	9	11	9	9	10	9	9	24	14	14	22	19	19	21	19	19	16	14	14	14	11	11	4	4	4	22.52	24.61
KCC2D_HUMAN	Q13557	Calcium/calmodulin-dependent protein kinase type II subunit delta OS=Homo sapiens GN=CAMK2D PE=1 SV=3	0.13885	-0.93	0.924933	0.0655452			3.15	0.69	0.009979	1	1	0	0	0	0	0	0	0	1	1	0	0	0	0	0	0	0	6	5	3	5	4	2	5	4	1	5	4	2	11	10	6	1	1	0	17.69	14.4201
GAR1_HUMAN	Q9NY12	H/ACA ribonucleoprotein complex subunit 1 OS=Homo sapiens GN=GAR1 PE=1 SV=1	0.95	-2.10018	0.684838	0.42649			3.09	0.71	0.079307	2	2	2	2	2	2	3	3	3	1	1	1	2	2	2	4	4	4	0	0	0	0	0	0	0	0	0	0	0	0	0	0	0	1	1	1	19.4	24.25
CPNS1_HUMAN	P04632	Calpain small subunit 1 OS=Homo sapiens GN=CAPNS1 PE=1 SV=1	0.193333	-5.26604	0.93234	0.0148823			3.17	0.78	0.014077	1	1	0	3	3	1	1	1	1	2	2	1	2	2	0	2	2	1	0	0	0	0	0	0	1	1	0	1	1	1	1	1	0	1	1	1	17.94	23.4
RAP1A_HUMAN	P62834	Ras-related protein Rap-1A OS=Homo sapiens GN=RAP1A PE=1 SV=1	-0.4	-7.41784	0.913114	0.00172744			3.15	0.67	0.002611	1	1	0	9	6	1	3	3	0	3	3	0	3	3	0	5	4	0	0	0	0	0	0	0	0	0	0	1	1	0	1	1	0	1	1	0	17.17	27.5
TRI25_HUMAN	Q14258	E3 ubiquitin/ISG15 ligase TRIM25 OS=Homo sapiens GN=TRIM25 PE=1 SV=2	0.13	0.56	0.836439	0.113574			4.31	0.78	0.004955	13	12	12	6	6	6	12	9	9	14	12	12	12	11	11	8	8	8	20	14	14	15	13	13	18	14	14	11	9	9	14	12	12	4	4	4	22.01	23.04
TIAR_HUMAN	Q01085	Nucleolysin TIAR OS=Homo sapiens GN=TIAL1 PE=1 SV=1	-0.714656	-1.13667	0.814317	0.0308082			2.78	0.64	0.088117	0	0	0	5	5	2	3	3	2	3	3	3	1	1	0	4	4	2	3	3	2	4	4	2	4	4	1	3	3	2	5	5	2	2	2	1	14.906	23.61
GSHR_HUMAN	P00390	Glutathione reductase, mitochondrial OS=Homo sapiens GN=GSR PE=1 SV=2	-0.604561	-0.00666746	0.607616	0.98993			4.3	0.69	0.008218	5	5	5	1	1	1	0	0	0	3	3	3	4	4	4	1	1	1	6	6	6	9	8	8	9	8	8	8	7	7	4	4	4	2	2	2	20.59	18.79
SYLC_HUMAN	Q9P2J5	Leucine--tRNA ligase, cytoplasmic OS=Homo sapiens GN=LARS PE=1 SV=2	1.95	0.43	0.0632896	0.252423			4.16	0.76	0.003508	15	15	15	7	7	7	10	10	10	19	17	17	6	5	5	5	5	5	29	24	24	24	18	18	30	25	25	22	19	19	25	21	21	6	5	5	21.36	21.91
RFC3_HUMAN	P40938	Replication factor C subunit 3 OS=Homo sapiens GN=RFC3 PE=1 SV=2	0.623333	-0.423333	0.545179	0.37414			3.41	0.74	0.001631	5	5	5	6	6	6	7	7	7	7	6	6	7	6	6	3	3	3	9	8	8	8	8	8	14	11	11	10	7	7	12	9	9	2	2	2	18.83	22.06
GRWD1_HUMAN	Q9BQ67	Glutamate-rich WD repeat-containing protein 1 OS=Homo sapiens GN=GRWD1 PE=1 SV=1	2.37951	-1.57	0.130934	0.0988217			3.05	0.6	0.044796	0	0	0	0	0	0	1	1	1	0	0	0	0	0	0	0	0	0	1	1	1	3	3	3	2	1	1	4	4	4	2	2	2	2	2	2	15.7244	16.7583
TCRG1_HUMAN	O14776	Transcription elongation regulator 1 OS=Homo sapiens GN=TCERG1 PE=1 SV=2	-0.12	0.37	0.897592	0.391016			3.35	0.7	0.00242	30	27	25	11	10	9	14	12	11	18	16	16	22	20	20	28	23	22	25	21	21	19	18	18	31	27	26	23	21	19	24	21	20	6	6	6	21.82	22.83
COASY_HUMAN	Q13057	Bifunctional coenzyme A synthase OS=Homo sapiens GN=COASY PE=1 SV=4	-0.692146	-0.66	0.660796	0.243568			3.74	0.69	0.022237	0	0	0	1	1	1	0	0	0	1	1	1	1	1	1	0	0	0	6	5	5	5	4	4	8	5	5	4	4	4	4	3	3	2	2	2	15.4416	19.44
IMA4_HUMAN	O00629	Importin subunit alpha-4 OS=Homo sapiens GN=KPNA4 PE=1 SV=1	1.11099	-0.533334	0.386694	0.249327			3.36	0.63	0.256323	1	1	1	1	1	0	1	1	0	1	1	0	0	0	0	1	1	0	4	3	0	3	3	1	2	2	1	2	2	1	2	2	1	1	1	1	18.25	20.2
EI2BD_HUMAN	Q9UI10	Translation initiation factor eIF-2B subunit delta OS=Homo sapiens GN=EIF2B4 PE=1 SV=2	-1.65463	-0.16	0.258182	0.725994			4.03	0.71	0.003752	1	1	1	0	0	0	2	2	2	2	2	2	2	2	2	2	2	2	5	5	5	5	5	5	10	6	6	7	7	7	7	7	7	3	3	3	18.11	16.0461
ANX11_HUMAN	P50995	Annexin A11 OS=Homo sapiens GN=ANXA11 PE=1 SV=1	-1.92566	-1.10333	0.0998485	0.145989			3.08	0.69	0.003027	1	1	1	0	0	0	0	0	0	2	2	1	2	2	2	1	1	1	3	3	2	8	8	7	7	7	6	7	7	6	8	8	7	2	2	2	18.02	16.1308
COR1B_HUMAN	Q9BR76	Coronin-1B OS=Homo sapiens GN=CORO1B PE=1 SV=1	-1.65	-2.50333	0.413121	0.0149753			4.79	0.62	0.019465	2	2	2	3	3	3	1	1	1	4	4	4	3	3	3	7	5	5	3	3	3	2	2	2	2	2	2	4	3	3	5	3	3	1	1	1	20.64	23.37
RAP1B_HUMAN	P61224	Ras-related protein Rap-1b OS=Homo sapiens GN=RAP1B PE=1 SV=1	-0.356666	-4.86928	0.923416	0.0200646			3.21	0.67	0.002611	1	1	0	10	7	0	4	4	0	3	3	0	3	3	0	6	5	0	0	0	0	1	1	0	0	0	0	1	1	0	1	1	0	1	1	0	16.91	27.33
SYSC_HUMAN	P49591	Serine--tRNA ligase, cytoplasmic OS=Homo sapiens GN=SARS PE=1 SV=3	0.627461	-1.27333	0.825135	0.0258606			3.52	0.6	0.008552	1	1	1	3	3	3	2	2	2	2	2	2	0	0	0	3	3	3	4	4	4	4	4	4	4	4	4	4	4	4	4	4	4	3	3	3	15.86	22.46
VDAC1_HUMAN	P21796	Voltage-dependent anion-selective channel protein 1 OS=Homo sapiens GN=VDAC1 PE=1 SV=2	0.163333	-5.2035	0.969213	0.0283865			6.39	0.8	0.000654	2	2	2	59	21	21	30	13	13	5	5	5	11	7	7	27	14	14	0	0	0	1	1	1	0	0	0	7	6	6	2	2	2	1	1	1	18.11	30.29
DPYL3_HUMAN	Q14195	Dihydropyrimidinase-related protein 3 OS=Homo sapiens GN=DPYSL3 PE=1 SV=1	1.43857	-1.01	0.118359	0.147603			1.91	0.34	0.605108	3	1	0	2	1	0	1	1	0	0	0	0	1	1	0	0	0	0	2	1	0	3	1	0	4	1	0	2	1	0	3	1	0	2	1	0	16.6	18.97
DPYL1_HUMAN	Q14194	Dihydropyrimidinase-related protein 1 OS=Homo sapiens GN=CRMP1 PE=1 SV=1	2.00455	-1.00667	0.0955501	0.149946			1.91	0.34	0.605108	3	1	0	2	1	0	1	1	0	0	0	0	1	1	0	0	0	0	2	1	0	3	1	0	4	1	0	2	1	0	3	1	0	2	1	0	16.55	18.93
SMCE1_HUMAN	Q969G3	SWI/SNF-related matrix-associated actin-dependent regulator of chromatin subfamily E member 1 OS=Homo sapiens GN=SMARCE1 PE=1 SV=2	-0.739999	-0.653333	0.416657	0.13735			3.71	0.69	0.011874	1	1	1	1	1	1	1	1	1	3	3	3	2	2	2	1	1	1	7	5	5	6	4	4	7	5	5	6	5	5	8	5	5	2	2	2	17.03	19.69
BZW2_HUMAN	Q9Y6E2	Basic leucine zipper and W2 domain-containing protein 2 OS=Homo sapiens GN=BZW2 PE=1 SV=1	0.673332	-1.26667	0.783733	0.0102529			3.5	0.59	0.0027	1	1	0	8	6	4	6	5	4	2	2	1	2	2	1	6	5	4	5	5	3	5	5	4	6	6	5	7	7	6	8	7	6	3	3	2	18.64	24.81
PLRG1_HUMAN	O43660	Pleiotropic regulator 1 OS=Homo sapiens GN=PLRG1 PE=1 SV=1	-0.326666	-0.676667	0.725058	0.28677			4.13	0.73	0.013982	6	5	5	3	3	3	4	4	4	8	7	7	6	5	5	7	6	6	9	7	7	9	7	7	11	9	9	13	11	11	12	11	11	3	3	3	20.84	22.14
G6PD_HUMAN	P11413	Glucose-6-phosphate 1-dehydrogenase OS=Homo sapiens GN=G6PD PE=1 SV=4	-0.0866674	-0.71	0.940493	0.226928			4.55	0.73	0.040575	7	7	7	3	3	3	3	3	3	4	4	4	7	7	7	6	6	6	5	5	5	13	13	13	10	10	10	9	9	9	11	11	11	3	3	3	20.17	21.05
EXOS6_HUMAN	Q5RKV6	Exosome complex component MTR3 OS=Homo sapiens GN=EXOSC6 PE=1 SV=1	0.193335	-0.71	0.890088	0.0359788			4.26	0.71	0.001238	1	1	1	5	5	5	2	2	2	2	2	2	2	2	2	2	2	2	1	1	1	2	2	2	3	3	3	3	2	2	2	2	2	1	1	1	19.36	23.04
RPP30_HUMAN	P78346	Ribonuclease P protein subunit p30 OS=Homo sapiens GN=RPP30 PE=1 SV=1	0.82	-1.12333	0.6201	0.0255539			2.96	0.63	0.005478	4	4	4	5	5	5	6	6	6	5	5	5	2	2	2	5	5	5	3	3	3	3	3	3	5	4	4	4	3	3	6	5	5	1	1	1	20.06	23.42
TBL1R_HUMAN	Q9BZK7	F-box-like/WD repeat-containing protein TBL1XR1 OS=Homo sapiens GN=TBL1XR1 PE=1 SV=1	-1.21207	-1.13333	0.545989	0.00058193			4.02	0.68	0.027462	1	1	1	1	1	0	0	0	0	1	1	1	2	2	1	1	1	1	2	2	1	2	2	1	4	4	2	3	3	2	3	3	1	2	2	1	18.27	20.8
GNAI3_HUMAN	P08754	Guanine nucleotide-binding protein G(k) subunit alpha OS=Homo sapiens GN=GNAI3 PE=1 SV=3	-1.46469	-1.62333	0.622465	0.0135292			3.31	0.62	0.128949	0	0	0	4	4	2	4	3	2	1	1	0	3	2	1	5	4	2	1	1	0	1	1	0	1	1	0	1	1	0	1	1	0	1	1	0	15.5359	23.7
GNAI1_HUMAN	P63096	Guanine nucleotide-binding protein G(i) subunit alpha-1 OS=Homo sapiens GN=GNAI1 PE=1 SV=2	-1.751	-1.62333	0.53727	0.0135292			3.31	0.62	0.128949	0	0	0	3	3	1	2	1	0	1	1	0	1	1	0	3	2	0	1	1	0	1	1	0	1	1	0	1	1	0	1	1	0	1	1	0	15.807	23.26
GNAT1_HUMAN	P11488	Guanine nucleotide-binding protein G(t) subunit alpha-1 OS=Homo sapiens GN=GNAT1 PE=1 SV=5	-2.80697	-1.62333	0.238527	0.0135292			2.46	0.57	0.128949	0	0	0	1	1	0	0	0	0	1	1	0	1	1	0	2	1	0	1	1	0	1	1	0	1	1	0	1	1	0	1	1	0	1	1	0	17.1379	21.07
PRS8_HUMAN	P62195	26S protease regulatory subunit 8 OS=Homo sapiens GN=PSMC5 PE=1 SV=1	0.189999	-0.683333	0.792801	0.207073			4.89	0.74	0.032879	3	3	2	2	2	2	3	3	2	4	4	3	5	4	3	2	2	2	7	6	5	7	6	5	13	11	10	11	11	10	13	12	11	3	2	1	19.71	21.74
NQO2_HUMAN	P16083	Ribosyldihydronicotinamide dehydrogenase [quinone] OS=Homo sapiens GN=NQO2 PE=1 SV=5	0.773333	-4.6041	0.522642	0.0458391			2.72	0.57	0.030304	2	2	2	1	1	1	1	1	1	1	1	1	2	2	2	1	1	1	0	0	0	1	1	1	0	0	0	2	2	2	2	2	2	1	1	1	19.73	21.81
PITH1_HUMAN	Q9GZP4	PITH domain-containing protein 1 OS=Homo sapiens GN=PITHD1 PE=1 SV=1	0.633333	-0.949999	0.0131624	0.208036			2.75	0.69	0.00386	6	6	6	3	3	3	5	5	5	4	4	4	5	5	5	1	1	1	4	4	4	6	6	6	5	5	5	6	6	6	5	5	5	1	1	1	20.61	20.82
GMDS_HUMAN	O60547	GDP-mannose 4,6 dehydratase OS=Homo sapiens GN=GMDS PE=1 SV=1	1.25196	0.0833333	0.258591	0.889047			3.82	0.72	0.013847	3	3	3	0	0	0	2	2	2	3	3	3	1	1	1	0	0	0	6	6	6	8	7	7	5	4	4	6	5	5	6	6	6	2	2	2	19.13	17.1015
GNAO_HUMAN	P09471	Guanine nucleotide-binding protein G(o) subunit alpha OS=Homo sapiens GN=GNAO1 PE=1 SV=4	-1.63954	-1.62667	0.516755	0.0135808			3.31	0.62	0.128949	0	0	0	2	2	1	2	1	0	1	1	0	1	1	0	3	2	0	1	1	0	1	1	0	1	1	0	1	1	0	1	1	0	1	1	0	16.5314	22.71
PSMD2_HUMAN	Q13200	26S proteasome non-ATPase regulatory subunit 2 OS=Homo sapiens GN=PSMD2 PE=1 SV=3	0.156667	0.0366669	0.880064	0.955629			4.89	0.72	0.005185	6	6	6	8	7	7	7	6	6	7	7	7	5	5	5	9	8	8	14	13	13	18	16	15	14	13	13	14	11	11	12	12	12	4	4	4	19.88	21.79
CYR61_HUMAN	O00622	Protein CYR61 OS=Homo sapiens GN=CYR61 PE=1 SV=1	0.439999	0.116667	0.614936	0.901025			2.99	0.68	0.021625	6	3	3	4	2	2	6	4	4	6	3	3	6	3	3	5	3	3	9	6	6	8	7	7	10	7	7	9	6	6	9	6	6	2	2	2	21.09	22.9
HSP7E_HUMAN	Q0VDF9	Heat shock 70 kDa protein 14 OS=Homo sapiens GN=HSPA14 PE=1 SV=1	-3.04429	-0.46	0.0609681	0.254639			2.61	0.65	0.141842	0	0	0	0	0	0	1	1	1	1	1	1	1	1	1	2	2	2	6	6	6	4	4	4	4	4	4	4	4	4	3	3	3	2	2	2	15.5297	15.2475
GNAT2_HUMAN	P19087	Guanine nucleotide-binding protein G(t) subunit alpha-2 OS=Homo sapiens GN=GNAT2 PE=1 SV=4	-3.62223	-1.62333	0.213887	0.0135293			2.46	0.57	0.128949	0	0	0	1	1	0	0	0	0	1	1	0	1	1	0	2	1	0	1	1	0	1	1	0	1	1	0	1	1	0	1	1	0	1	1	0	16.697	20.91
PSMD4_HUMAN	P55036	26S proteasome non-ATPase regulatory subunit 4 OS=Homo sapiens GN=PSMD4 PE=1 SV=1	3.08887	-0.956667	0.0907649	0.0306775			4.46	0.7	0.146845	1	1	1	1	1	1	1	1	1	1	1	1	0	0	0	0	0	0	2	2	2	2	2	2	3	3	3	2	2	2	3	3	3	1	1	1	18.79	21.74
GRP75_HUMAN	P38646	Stress-70 protein, mitochondrial OS=Homo sapiens GN=HSPA9 PE=1 SV=2	1.17667	1.94667	0.800235	0.0461428			5.32	0.78	0.002153	3	3	2	87	37	37	21	15	14	5	4	4	8	7	6	41	26	26	22	13	13	29	21	20	31	21	20	9	8	8	9	7	7	3	3	3	16.86	29.38
ANLN_HUMAN	Q9NQW6	Actin-binding protein anillin OS=Homo sapiens GN=ANLN PE=1 SV=2	-0.25	0.183334	0.857818	0.70625			4.51	0.76	0.0077	14	11	11	5	5	5	6	6	6	11	11	11	9	9	9	16	15	15	23	21	21	16	16	16	22	20	20	19	19	19	26	23	23	4	4	4	19.78	21.87
CSTF1_HUMAN	Q05048	Cleavage stimulation factor subunit 1 OS=Homo sapiens GN=CSTF1 PE=1 SV=1	-0.176666	-0.4	0.842189	0.388407			4.77	0.71	0.058508	2	2	2	1	1	1	2	2	2	3	3	3	2	2	2	2	2	2	3	3	3	4	4	4	3	3	3	2	2	2	2	2	2	1	1	1	19.35	20.67
GNAI2_HUMAN	P04899	Guanine nucleotide-binding protein G(i) subunit alpha-2 OS=Homo sapiens GN=GNAI2 PE=1 SV=3	-1.29953	-1.62333	0.614028	0.0136065			3.31	0.66	0.128949	0	0	0	3	3	1	4	3	2	1	1	0	2	2	1	3	2	0	1	1	0	1	1	0	1	1	0	1	1	0	1	1	0	1	1	0	16.3214	22.95
GNAL_HUMAN	P38405	Guanine nucleotide-binding protein G(olf) subunit alpha OS=Homo sapiens GN=GNAL PE=1 SV=1	-3.72477	-1.62333	0.144558	0.0136065			3.39	0.58	0.128949	0	0	0	1	1	0	0	0	0	1	1	0	1	1	0	2	1	0	1	1	0	1	1	0	1	1	0	1	1	0	1	1	0	1	1	0	15.9978	19.99
GNAT3_HUMAN	A8MTJ3	Guanine nucleotide-binding protein G(t) subunit alpha-3 OS=Homo sapiens GN=GNAT3 PE=2 SV=2	-2.60299	-1.62333	0.260246	0.0136065			2.46	0.57	0.128949	0	0	0	1	1	0	0	0	0	1	1	0	1	1	0	2	1	0	1	1	0	1	1	0	1	1	0	1	1	0	1	1	0	1	1	0	16.0573	20.83
RAE1L_HUMAN	P78406	mRNA export factor OS=Homo sapiens GN=RAE1 PE=1 SV=1	3.52471	-0.406666	0.0567338	0.521282			3.61	0.69	0.005474	2	2	2	1	1	1	5	5	5	1	1	1	1	1	1	0	0	0	3	3	3	8	7	7	7	6	6	4	4	4	5	5	5	1	1	1	18.72	18.57
SAHH3_HUMAN	Q96HN2	Putative adenosylhomocysteinase 3 OS=Homo sapiens GN=AHCYL2 PE=1 SV=1	0.646666	-1.77333	0.721068	0.0292629			3.06	0.61	0.015489	3	3	0	1	1	0	1	1	0	1	1	0	1	1	0	4	4	0	2	2	0	1	1	0	4	2	0	3	3	0	2	2	0	2	2	0	19.52	21.47
SEP14_HUMAN	Q6ZU15	Septin-14 OS=Homo sapiens GN=SEPT14 PE=1 SV=2	0.336667	-1.06333	0.754233	0.028145			2.16	0.53	0.070749	1	1	0	2	1	0	2	1	0	1	1	0	2	1	0	2	1	0	2	1	0	2	1	0	2	1	0	2	1	0	2	1	0	2	1	0	18.93	21.49
GUAD_HUMAN	Q9Y2T3	Guanine deaminase OS=Homo sapiens GN=GDA PE=1 SV=1	0.21	-0.58	0.732532	0.245916			4.3	0.73	0.009587	5	5	5	1	1	1	1	1	1	3	3	3	4	3	3	1	1	1	6	6	6	5	4	4	7	6	6	7	6	6	8	7	7	2	2	2	19.44	19.1
ZCCHL_HUMAN	Q96H79	Zinc finger CCCH-type antiviral protein 1-like OS=Homo sapiens GN=ZC3HAV1L PE=1 SV=2	-0.63	-0.739999	0.344697	0.244012			3.66	0.68	0.046751	3	3	3	1	1	1	4	4	4	4	4	4	4	4	4	3	3	3	3	3	3	4	4	4	3	3	3	5	4	4	7	4	4	1	1	1	20.03	19.18
IMA1_HUMAN	P52294	Importin subunit alpha-1 OS=Homo sapiens GN=KPNA1 PE=1 SV=3	1.12	1.03	0.520105	0.0420609			3.23	0.63	0.008461	1	1	0	2	2	1	2	2	1	2	1	1	1	1	0	2	2	1	11	9	6	6	4	2	9	5	3	3	3	2	4	3	2	1	1	0	18.6	22.61
GNAS2_HUMAN	P63092	Guanine nucleotide-binding protein G(s) subunit alpha isoforms short OS=Homo sapiens GN=GNAS PE=1 SV=1	-2.27491	-1.62667	0.401316	0.0135808			3.39	0.58	0.025233	0	0	0	3	3	0	1	1	0	1	1	0	2	2	0	4	3	0	1	1	0	1	1	0	1	1	0	1	1	0	1	1	0	1	1	0	15.2353	21.94
EPIPL_HUMAN	P58107	Epiplakin OS=Homo sapiens GN=EPPK1 PE=1 SV=2	-0.0766665	-0.786666	0.970025	0.169098			6.12	0.81	0.000308	127	85	76	279	124	114	287	119	108	146	92	82	191	103	94	287	133	123	23	16	14	14	14	11	23	21	16	16	12	7	18	16	12	8	7	2	23.26	28.26
RPAC1_HUMAN	O15160	DNA-directed RNA polymerases I and III subunit RPAC1 OS=Homo sapiens GN=POLR1C PE=1 SV=1	0.241676	-0.293333	0.916328	0.661932			3.83	0.81	0.022941	1	1	1	0	0	0	5	5	5	1	1	1	1	1	1	0	0	0	4	4	4	5	5	5	5	5	5	3	3	3	7	7	7	1	1	1	18.73	15.7297
PLIN3_HUMAN	O60664	Perilipin-3 OS=Homo sapiens GN=PLIN3 PE=1 SV=3	0.683333	-1.37	0.732102	0.0172584			3.93	0.76	0.013838	1	1	1	2	2	2	3	3	3	2	2	2	1	1	1	2	2	2	6	5	5	5	4	4	9	7	7	8	7	7	10	7	7	2	2	2	16.35	20.52
IMA7_HUMAN	O60684	Importin subunit alpha-7 OS=Homo sapiens GN=KPNA6 PE=1 SV=1	1.95001	1.29333	0.345385	0.0101618			3.36	0.68	0.008461	1	1	0	1	1	0	1	1	0	0	0	0	1	1	0	1	1	0	5	4	1	4	4	2	7	5	2	1	1	0	2	2	1	1	1	0	18.48	22.13
HDA10_HUMAN	Q969S8	Histone deacetylase 10 OS=Homo sapiens GN=HDAC10 PE=1 SV=1	0.432696	-1.49333	0.89093	0.0355343			4.56	0.76	0.048118	4	3	3	0	0	0	4	4	4	4	4	4	4	3	3	0	0	0	1	1	1	1	1	1	3	3	3	2	2	2	3	3	3	1	1	1	21	15.3285
CELF1_HUMAN	Q92879	CUGBP Elav-like family member 1 OS=Homo sapiens GN=CELF1 PE=1 SV=2	0.366666	-0.836666	0.841675	0.334418			3.4	0.67	0.004901	2	2	2	2	2	2	4	2	2	2	2	2	2	1	1	5	4	4	3	3	3	6	6	4	8	6	5	5	5	4	6	5	4	1	1	1	19.57	19.17
EI2BG_HUMAN	Q9NR50	Translation initiation factor eIF-2B subunit gamma OS=Homo sapiens GN=EIF2B3 PE=1 SV=1	0.857758	-0.406666	0.238386	0.536616			3.77	0.68	0.014549	1	1	1	1	1	1	0	0	0	1	1	1	1	1	1	0	0	0	7	6	6	5	4	4	6	5	5	8	7	7	10	8	8	1	1	1	17.71	17.14
MEMO1_HUMAN	Q9Y316	Protein MEMO1 OS=Homo sapiens GN=MEMO1 PE=1 SV=1	0.256666	-1.84667	0.812075	0.0324522			2.65	0.54	0.00103	1	1	1	1	1	1	2	2	2	2	2	2	1	1	1	1	1	1	1	1	1	1	1	1	4	3	3	4	3	3	3	3	3	1	1	1	17.31	20.26
ARPC2_HUMAN	O15144	Actin-related protein 2/3 complex subunit 2 OS=Homo sapiens GN=ARPC2 PE=1 SV=1	1.18	-2.19667	0.6803	0.0491625			3.02	0.75	0.011446	4	4	4	8	7	7	8	7	7	2	2	2	8	7	7	13	11	11	1	1	1	4	4	4	2	2	2	3	3	3	4	4	4	1	1	1	18.79	24.12
KCRB_HUMAN	P12277	Creatine kinase B-type OS=Homo sapiens GN=CKB PE=1 SV=1	0.976667	-1.67333	0.503084	0.0288141			4.4	0.8	0.018902	5	4	4	2	2	2	5	4	4	3	3	3	2	2	2	3	2	2	3	3	3	5	5	5	4	4	4	4	4	4	8	6	6	1	1	1	20.04	21.9
IF5_HUMAN	P55010	Eukaryotic translation initiation factor 5 OS=Homo sapiens GN=EIF5 PE=1 SV=2	0.819132	-1.29333	0.712536	0.0175161			2.28	0.68	0.026341	2	2	2	2	2	2	1	1	1	0	0	0	1	1	1	2	2	2	2	2	2	2	2	2	2	2	2	2	2	2	2	2	2	1	1	1	19.62	21.82
AIP_HUMAN	O00170	AH receptor-interacting protein OS=Homo sapiens GN=AIP PE=1 SV=2	0.303333	-0.153333	0.827197	0.813903			3.38	0.79	0.004361	4	4	4	3	3	3	5	5	5	6	6	6	3	3	3	3	3	3	4	4	4	7	7	7	9	8	8	5	5	5	7	6	6	1	1	1	19.42	21.8
LIS1_HUMAN	P43034	Platelet-activating factor acetylhydrolase IB subunit alpha OS=Homo sapiens GN=PAFAH1B1 PE=1 SV=2	0	-1.00667	1	0.328522			3.68	0.75	0.094531	0	0	0	0	0	0	0	0	0	0	0	0	0	0	0	0	0	0	2	2	2	7	6	6	5	4	4	4	4	4	4	3	3	2	2	2	16.9366	15.5989
UBP14_HUMAN	P54578	Ubiquitin carboxyl-terminal hydrolase 14 OS=Homo sapiens GN=USP14 PE=1 SV=3	-0.446667	-1.25	0.750101	0.108827			3.42	0.71	0.011788	1	1	1	1	1	1	1	1	1	1	1	1	1	1	1	3	3	3	2	2	2	5	5	5	6	5	5	5	5	5	6	6	6	1	1	1	17.17	17.4
TBL1Y_HUMAN	Q9BQ87	F-box-like/WD repeat-containing protein TBL1Y OS=Homo sapiens GN=TBL1Y PE=2 SV=1	1.76405	-1.13667	0.398077	0.00767292			2.45	0.65	0.027462	0	0	0	1	1	0	0	0	0	0	0	0	1	1	0	0	0	0	1	1	0	1	1	0	2	2	0	1	1	0	2	2	0	1	1	0	16.5952	20.68
K1967_HUMAN	Q8N163	DBIRD complex subunit KIAA1967 OS=Homo sapiens GN=KIAA1967 PE=1 SV=2	0.677661	0.353334	0.571947	0.521047			3.3	0.74	0.004772	6	6	6	0	0	0	1	1	1	6	5	5	0	0	0	1	1	1	9	9	9	4	4	4	11	10	10	8	8	8	6	6	6	2	2	2	19.73	16.7065
RO60_HUMAN	P10155	60 kDa SS-A/Ro ribonucleoprotein OS=Homo sapiens GN=TROVE2 PE=1 SV=2	0.886666	-0.6	0.588119	0.0188015			4.92	0.66	0.053756	3	3	3	4	4	4	3	3	3	2	2	2	1	1	1	4	4	4	3	3	3	5	5	5	4	4	4	3	3	3	4	4	4	2	2	2	18.69	21.57
GLYG_HUMAN	P46976	Glycogenin-1 OS=Homo sapiens GN=GYG1 PE=1 SV=4	-0.538327	0.883333	0.752789	0.04338			2.48	0.45	0.001715	2	2	2	1	1	1	0	0	0	1	1	1	1	1	1	1	1	1	2	2	2	3	3	3	2	2	2	1	1	1	2	2	2	1	1	1	19.86	20.42
SEPT6_HUMAN	Q14141	Septin-6 OS=Homo sapiens GN=SEPT6 PE=1 SV=4	0.983612	-0.183333	0.579838	0.826806			2.68	0.69	0.047272	1	1	0	1	1	0	0	0	0	0	0	0	0	0	0	1	1	0	4	4	1	6	5	1	4	4	0	4	4	0	7	6	1	1	1	0	16.11	19.43
TBL1X_HUMAN	O60907	F-box-like/WD repeat-containing protein TBL1X OS=Homo sapiens GN=TBL1X PE=1 SV=3	0.842971	-1.13667	0.69986	0.00767282			2.45	0.65	0.027462	0	0	0	1	1	0	0	0	0	0	0	0	1	1	0	0	0	0	1	1	0	1	1	0	2	2	0	1	1	0	2	2	0	1	1	0	15.373	20.57
RBM3_HUMAN	P98179	Putative RNA-binding protein 3 OS=Homo sapiens GN=RBM3 PE=1 SV=1	-0.116666	-2.23333	0.963884	0.0239938			3.36	0.76	0.069553	1	1	1	3	3	3	3	3	3	2	2	2	2	2	2	3	3	3	1	1	1	1	1	1	1	1	1	2	2	2	3	3	3	1	1	1	16.99	23.93
SEP10_HUMAN	Q9P0V9	Septin-10 OS=Homo sapiens GN=SEPT10 PE=1 SV=2	0.0492541	-0.946667	0.982574	0.0251292			2.65	0.64	0.005735	0	0	0	1	1	0	0	0	0	0	0	0	0	0	0	1	1	0	2	2	1	2	2	1	2	2	1	1	1	0	2	2	1	1	1	0	14.4185	19.37
SEPT8_HUMAN	Q92599	Septin-8 OS=Homo sapiens GN=SEPT8 PE=1 SV=4	-0.348226	-1.18667	0.857804	0.0311723			1.8	0.48	0.047272	0	0	0	1	1	0	0	0	0	0	0	0	0	0	0	1	1	0	1	1	0	2	2	0	1	1	0	2	2	0	2	2	0	1	1	0	15.0955	19.37
COPD_HUMAN	P48444	Coatomer subunit delta OS=Homo sapiens GN=ARCN1 PE=1 SV=1	0.413333	-1.32	0.813833	0.0282341			2.89	0.6	0.011541	3	3	3	6	6	6	6	6	6	4	4	4	3	3	3	5	5	5	6	5	5	3	3	3	6	6	6	5	4	4	10	9	9	1	1	1	18	22.24
GNAS1_HUMAN	Q5JWF2	Guanine nucleotide-binding protein G(s) subunit alpha isoforms XLas OS=Homo sapiens GN=GNAS PE=1 SV=2	-1.62745	-1.62667	0.471707	0.0135808			3.39	0.58	0.025233	0	0	0	3	3	0	1	1	0	1	1	0	2	2	0	4	3	0	1	1	0	1	1	0	1	1	0	1	1	0	1	1	0	1	1	0	16.5077	21.27
LC7L3_HUMAN	O95232	Luc7-like protein 3 OS=Homo sapiens GN=LUC7L3 PE=1 SV=2	1.5	-1.38	0.361465	0.0287888			4.08	0.76	0.019895	1	1	1	2	2	2	3	3	3	2	2	2	1	1	1	2	2	2	1	1	1	1	1	1	2	2	2	2	2	2	2	2	2	1	1	1	18.43	21.91
DCTN2_HUMAN	Q13561	Dynactin subunit 2 OS=Homo sapiens GN=DCTN2 PE=1 SV=4	-2.26121	-0.403334	0.104693	0.552869			3.03	0.58	0.024388	2	2	2	0	0	0	0	0	0	1	1	1	1	1	1	1	1	1	5	5	5	5	5	5	5	5	5	6	5	5	6	5	5	1	1	1	17.53	15.7898
CEP55_HUMAN	Q53EZ4	Centrosomal protein of 55 kDa OS=Homo sapiens GN=CEP55 PE=1 SV=3	0.643334	-0.783333	0.392436	0.323358			2.82	0.69	0.103626	2	2	2	1	1	1	1	1	1	1	1	1	1	1	1	1	1	1	8	7	7	7	6	6	6	5	5	7	6	6	9	7	7	2	2	2	16.77	16.19
LMO7_HUMAN	Q8WWI1	LIM domain only protein 7 OS=Homo sapiens GN=LMO7 PE=1 SV=3	-0.513333	-1.14333	0.821798	0.0395756			5.67	0.79	0.013068	22	19	19	33	26	26	11	11	11	21	19	19	31	24	24	70	49	49	8	8	8	3	3	3	4	4	4	11	11	11	10	10	10	4	4	4	19.79	24.27
UMPS_HUMAN	P11172	Uridine 5'-monophosphate synthase OS=Homo sapiens GN=UMPS PE=1 SV=1	1.28975	-1.39	0.494637	0.0354925			2.74	0.66	0.096513	0	0	0	1	1	1	0	0	0	1	1	1	1	1	1	0	0	0	1	1	1	2	2	2	1	1	1	3	3	3	3	3	3	1	1	1	16.6136	20.5
RAD50_HUMAN	Q92878	DNA repair protein RAD50 OS=Homo sapiens GN=RAD50 PE=1 SV=1	-0.0933342	0.16	0.913845	0.807274			4.97	0.66	0.010829	18	18	18	5	5	5	6	4	4	15	14	14	11	10	10	11	10	10	20	18	18	17	16	16	26	25	25	23	22	22	21	20	20	3	3	3	19.7	20.49
PSIP1_HUMAN	O75475	PC4 and SFRS1-interacting protein OS=Homo sapiens GN=PSIP1 PE=1 SV=1	-0.636134	-0.563334	0.753417	0.406676			2.18	0.54	0.041013	1	1	1	1	1	0	1	1	0	0	0	0	0	0	0	1	1	1	1	1	1	2	2	1	1	1	1	2	2	1	1	1	1	1	1	1	14.95	18.39
FKBP5_HUMAN	Q13451	Peptidyl-prolyl cis-trans isomerase FKBP5 OS=Homo sapiens GN=FKBP5 PE=1 SV=2	1.80683	-0.0300007	0.0556213	0.978076			3.18	0.72	0.027634	0	0	0	1	1	1	0	0	0	0	0	0	0	0	0	0	0	0	3	3	3	6	6	5	5	5	5	1	1	1	5	5	5	1	1	1	17.2292	17.5
SPTB1_HUMAN	P11277	Spectrin beta chain, erythrocytic OS=Homo sapiens GN=SPTB PE=1 SV=5	0.0766665	-2.40333	0.969066	0.017747			5.51	0.78	0.031441	8	5	0	8	5	0	6	4	0	9	5	0	7	5	0	9	4	0	2	2	0	2	2	0	2	1	0	3	3	0	3	3	0	3	3	0	18.66	23.06
AXIN1_HUMAN	O15169	Axin-1 OS=Homo sapiens GN=AXIN1 PE=1 SV=2	2.96076	1.39515	0.00956665	0.45798	O15169		4.26	0.71	0.103509	4	4	4	1	1	1	3	3	3	1	1	1	1	1	1	0	0	0	5	5	5	2	2	2	7	7	7	0	0	0	5	5	5	1	1	1	19.25	17.47
RINI_HUMAN	P13489	Ribonuclease inhibitor OS=Homo sapiens GN=RNH1 PE=1 SV=2	-0.738192	0.143333	0.618969	0.843719			3.25	0.71	0.105426	0	0	0	0	0	0	0	0	0	0	0	0	0	0	0	1	1	1	2	2	2	3	3	3	3	3	3	4	4	4	1	1	1	1	1	1	14.6857	16.0324
FILA2_HUMAN	Q5D862	Filaggrin-2 OS=Homo sapiens GN=FLG2 PE=1 SV=1	-0.401493	-0.663333	0.695643	0.337149			4.23	0.78	0.00786	3	3	3	0	0	0	0	0	0	1	1	1	3	3	3	0	0	0	10	5	5	3	2	2	7	5	5	4	3	3	5	3	3	1	1	1	15.78	13.9151
SAFB2_HUMAN	Q14151	Scaffold attachment factor B2 OS=Homo sapiens GN=SAFB2 PE=1 SV=1	-2.95667	0.253334	0.0642942	0.682996			5.2	0.73	0.0377	4	4	1	1	1	1	2	2	1	5	5	1	9	9	5	9	9	4	9	9	2	5	5	2	7	7	3	7	7	3	3	3	1	1	1	0	17.85	16.05
WDR1_HUMAN	O75083	WD repeat-containing protein 1 OS=Homo sapiens GN=WDR1 PE=1 SV=4	-1.22086	-1.31	0.616542	0.0177458			5.37	0.7	0.130404	0	0	0	4	4	4	1	1	1	3	3	3	1	1	1	6	6	6	1	1	1	1	1	1	3	3	3	2	2	2	2	2	2	1	1	1	16.1074	22.02
STA5B_HUMAN	P51692	Signal transducer and activator of transcription 5B OS=Homo sapiens GN=STAT5B PE=1 SV=2	-0.606667	0.0466671	0.55096	0.925458			2.46	0.61	0.005895	2	2	0	1	1	0	1	1	0	1	1	0	2	2	0	2	2	0	4	4	0	4	4	0	3	3	0	3	3	0	4	4	0	1	1	0	17.21	17.47
SPTN2_HUMAN	O15020	Spectrin beta chain, non-erythrocytic 2 OS=Homo sapiens GN=SPTBN2 PE=1 SV=3	0.0233326	-1.75	0.991123	0.0306265			5.51	0.78	0.001931	16	14	8	46	44	37	34	31	25	20	17	11	23	23	17	43	38	32	6	5	2	4	4	1	3	2	0	4	4	0	4	4	0	3	3	0	18.57	23.22
STA5A_HUMAN	P42229	Signal transducer and activator of transcription 5A OS=Homo sapiens GN=STAT5A PE=1 SV=1	-0.606666	0.0466671	0.550598	0.924874			2.46	0.61	0.005895	2	2	0	1	1	0	1	1	0	1	1	0	2	2	0	2	2	0	4	4	0	4	4	0	3	3	0	3	3	0	4	4	0	1	1	0	17.11	17.37
IF2P_HUMAN	O60841	Eukaryotic translation initiation factor 5B OS=Homo sapiens GN=EIF5B PE=1 SV=4	-0.98	1.2	0.402542	0.244065			8.05	0.78	0.013597	19	15	15	8	7	7	6	6	6	16	14	14	16	15	15	18	16	16	21	20	20	14	13	13	21	19	19	12	9	9	17	16	16	1	1	1	20.18	21.46
MACF1_HUMAN	Q9UPN3	Microtubule-actin cross-linking factor 1, isoforms 1/2/3/5 OS=Homo sapiens GN=MACF1 PE=1 SV=4	0.15	-0.265523	0.934164	0.876831			3.37	0.71	0.007366	7	6	5	14	11	10	14	12	11	5	3	2	5	5	4	12	10	9	4	4	4	4	4	4	6	6	6	0	0	0	2	2	2	1	1	0	20.43	24.67
PLOD3_HUMAN	O60568	Procollagen-lysine,2-oxoglutarate 5-dioxygenase 3 OS=Homo sapiens GN=PLOD3 PE=1 SV=1	-0.580001	0.143333	0.598047	0.847942			3.91	0.69	0.023931	3	3	3	2	2	2	2	2	2	3	3	3	4	4	4	3	3	3	6	6	6	4	4	4	5	5	5	5	5	5	8	8	8	1	1	1	18.4	19.96
PRP6_HUMAN	O94906	Pre-mRNA-processing factor 6 OS=Homo sapiens GN=PRPF6 PE=1 SV=1	0.713334	1.23667	0.492434	0.296279			4.25	0.71	0.013591	8	8	8	4	4	4	7	7	7	3	3	3	6	6	6	5	5	5	17	17	17	15	15	15	17	16	16	14	14	14	14	14	14	1	1	1	20.2	21.62
DSRAD_HUMAN	P55265	Double-stranded RNA-specific adenosine deaminase OS=Homo sapiens GN=ADAR PE=1 SV=4	0.473333	1.18667	0.69837	0.211154			3.77	0.77	0.009627	4	4	4	3	3	3	5	5	5	1	1	1	2	2	2	5	5	5	15	14	14	9	8	8	13	11	11	9	9	9	8	8	8	1	1	1	17.83	18.63
AKP13_HUMAN	Q12802	A-kinase anchor protein 13 OS=Homo sapiens GN=AKAP13 PE=1 SV=2	1.01333	1.26667	0.177107	0.0950347			4.68	0.77	0.001803	10	10	10	7	7	7	8	8	8	8	8	8	3	3	3	3	3	3	7	7	7	11	11	11	13	12	12	4	4	4	9	9	9	1	1	1	17.69	19.23
IFIX_HUMAN	Q6K0P9	Pyrin and HIN domain-containing protein 1 OS=Homo sapiens GN=PYHIN1 PE=1 SV=1	1.23523	3.36289	0.561029	0.0125802			3.17	0.69	0.093738	1	1	0	2	2	0	2	2	0	0	0	0	1	1	0	2	2	0	2	2	0	2	2	0	2	2	0	0	0	0	1	1	1	0	0	0	18.26	21.89
AKP8L_HUMAN	Q9ULX6	A-kinase anchor protein 8-like OS=Homo sapiens GN=AKAP8L PE=1 SV=3	0.366666	0.305652	0.699611	0.71056			4.07	0.69	0.024289	3	3	3	2	2	2	4	4	4	3	3	3	4	4	4	3	3	3	2	2	2	1	1	1	2	2	2	1	1	1	2	2	2	0	0	0	20.49	22.01
RENT2_HUMAN	Q9HAU5	Regulator of nonsense transcripts 2 OS=Homo sapiens GN=UPF2 PE=1 SV=1	-1.34	0.62443	0.22819	0.381527			3.5	0.68	0.006597	3	3	3	1	1	1	2	2	2	4	4	4	6	6	6	6	6	6	4	4	4	3	3	3	9	9	9	2	2	2	4	4	4	0	0	0	16.88	17.61
ERGI3_HUMAN	Q9Y282	Endoplasmic reticulum-Golgi intermediate compartment protein 3 OS=Homo sapiens GN=ERGIC3 PE=1 SV=1	-0.426667	1.24124	0.509725	0.29455			2.65	0.52	0.012563	2	2	2	1	1	1	2	1	1	4	4	4	2	2	2	1	1	1	0	0	0	0	0	0	1	1	1	0	0	0	0	0	0	0	0	0	21.35	22.57
PI42C_HUMAN	Q8TBX8	Phosphatidylinositol 5-phosphate 4-kinase type-2 gamma OS=Homo sapiens GN=PIP4K2C PE=1 SV=3	0	0.111422	1	0.861561			1.58	0.44	0.037636	0	0	0	0	0	0	0	0	0	0	0	0	0	0	0	0	0	0	1	1	1	1	1	1	2	2	2	1	1	1	1	1	1	0	0	0	16.1002	15.005
SYNEM_HUMAN	O15061	Synemin OS=Homo sapiens GN=SYNM PE=1 SV=2	-0.256667	0	0.866035	1			5.69	0.77	0.002369	17	17	17	25	22	22	33	25	25	22	21	21	17	16	16	27	25	25	0	0	0	0	0	0	0	0	0	0	0	0	0	0	0	0	0	0	20.12	23.33
SELB_HUMAN	P57772	Selenocysteine-specific elongation factor OS=Homo sapiens GN=EEFSEC PE=1 SV=4	-0.0348752	1.83462	0.962365	0.238025			3.29	0.65	0.089706	2	2	2	0	0	0	0	0	0	0	0	0	0	0	0	0	0	0	2	2	2	1	1	1	2	2	2	1	1	1	0	0	0	0	0	0	16.61	14.7129
DDX46_HUMAN	Q7L014	Probable ATP-dependent RNA helicase DDX46 OS=Homo sapiens GN=DDX46 PE=1 SV=2	-0.359225	-1.20984	0.886768	0.00975166			2.47	0.63	0.044733	0	0	0	3	3	3	0	0	0	3	3	3	1	1	1	2	2	2	1	1	1	0	0	0	1	1	1	1	1	1	1	1	1	0	0	0	15.4367	20.18
NEMF_HUMAN	O60524	Nuclear export mediator factor NEMF OS=Homo sapiens GN=NEMF PE=1 SV=4	-2.24707	1.07043	0.0951916	0.407738			2.58	0.58	0.097046	0	0	0	0	0	0	0	0	0	5	5	5	2	2	2	4	4	4	6	6	6	6	6	6	8	8	8	6	5	5	8	8	8	0	0	0	15.676	15.9913
PRPF3_HUMAN	O43395	U4/U6 small nuclear ribonucleoprotein Prp3 OS=Homo sapiens GN=PRPF3 PE=1 SV=2	0.4	1.8531	0.612093	0.300173			3.26	0.65	0.031179	4	4	4	3	3	3	2	2	2	3	3	3	4	4	4	2	2	2	9	8	8	9	9	9	7	7	7	4	4	4	8	8	8	0	0	0	20.09	21.6
ATTY_HUMAN	P17735	Tyrosine aminotransferase OS=Homo sapiens GN=TAT PE=1 SV=1	0	-6.73581	1	0.0431885			1.18	0.25	0.107757	0	0	0	0	0	0	0	0	0	0	0	0	0	0	0	0	0	0	0	0	0	0	0	0	0	0	0	1	1	1	2	1	1	0	0	0	15.5986	17.5173
K0020_HUMAN	Q15397	Pumilio domain-containing protein KIAA0020 OS=Homo sapiens GN=KIAA0020 PE=1 SV=3	1.67986	2.30844	0.576693	0.00408692			3.71	0.62	0.010645	1	1	1	3	2	2	3	3	3	0	0	0	0	0	0	5	4	4	3	2	2	2	2	2	3	3	3	0	0	0	1	1	1	0	0	0	16.03	21.36
ERGI2_HUMAN	Q96RQ1	Endoplasmic reticulum-Golgi intermediate compartment protein 2 OS=Homo sapiens GN=ERGIC2 PE=1 SV=2	-2.91667	0	0.0393306	1			3.89	0.65	0.451204	2	2	2	1	1	1	1	1	1	2	2	2	3	3	3	3	3	3	0	0	0	0	0	0	0	0	0	0	0	0	0	0	0	0	0	0	19.01	18.48
TMED9_HUMAN	Q9BVK6	Transmembrane emp24 domain-containing protein 9 OS=Homo sapiens GN=TMED9 PE=1 SV=2	2.17667	0	0.371785	1			3.64	0.66	0.034567	1	1	1	3	3	3	6	6	5	2	2	2	1	1	1	2	2	2	0	0	0	0	0	0	0	0	0	0	0	0	0	0	0	0	0	0	17.68	24.74
SH24A_HUMAN	Q9H788	SH2 domain-containing protein 4A OS=Homo sapiens GN=SH2D4A PE=1 SV=1	0	2.35673	1	0.12946			2.24	0.58	0.322025	0	0	0	0	0	0	0	0	0	0	0	0	0	0	0	0	0	0	1	1	1	2	2	2	1	1	1	0	0	0	0	0	0	0	0	0	15.2196	14.4537
UBA6_HUMAN	A0AVT1	Ubiquitin-like modifier-activating enzyme 6 OS=Homo sapiens GN=UBA6 PE=1 SV=1	-0.368374	0.676865	0.745296	0.300894			2.58	0.62	0.47126	2	2	2	0	0	0	0	0	0	0	0	0	0	0	0	0	0	0	3	3	3	3	3	3	2	2	2	1	1	1	0	0	0	0	0	0	16.65	15.306
CCNC_HUMAN	P24863	Cyclin-C OS=Homo sapiens GN=CCNC PE=1 SV=2	-1.33591	-0.51989	0.313585	0.686324			1.82	0.47	0.366522	1	1	1	0	0	0	1	1	1	1	1	1	1	1	1	1	1	1	1	1	1	1	1	1	1	1	1	2	2	2	2	2	2	0	0	0	17.07	14.8123
PCNP_HUMAN	Q8WW12	PEST proteolytic signal-containing nuclear protein OS=Homo sapiens GN=PCNP PE=1 SV=2	0.353334	-4.26189	0.868481	0.0675863			3.77	0.75	0.186639	1	1	1	4	3	3	4	3	3	1	1	1	2	2	2	4	3	3	0	0	0	0	0	0	0	0	0	2	2	2	1	1	1	0	0	0	17.53	22.12
8ODP_HUMAN	P36639	7,8-dihydro-8-oxoguanine triphosphatase OS=Homo sapiens GN=NUDT1 PE=1 SV=3	1.12968	-2.89305	0.539259	0.0219724			2.53	0.58	0.330144	1	1	1	1	1	1	1	1	1	0	0	0	0	0	0	2	2	2	0	0	0	0	0	0	0	0	0	1	1	1	1	1	1	0	0	0	17.05	19.43
ABLM1_HUMAN	O14639	Actin-binding LIM protein 1 OS=Homo sapiens GN=ABLIM1 PE=1 SV=3	-0.0999997	-2.06087	0.956304	0.0568977			5.99	0.77	0.006172	6	6	6	15	14	14	9	7	7	8	7	7	9	8	8	17	13	13	0	0	0	0	0	0	0	0	0	1	1	1	1	1	1	0	0	0	20.26	24.36
FBLN1_HUMAN	P23142	Fibulin-1 OS=Homo sapiens GN=FBLN1 PE=1 SV=4	-0.0193586	1.47329	0.984722	0.218415			2.24	0.59	0.301744	1	1	1	0	0	0	0	0	0	0	0	0	0	0	0	0	0	0	2	2	2	3	2	2	3	2	2	1	1	1	2	2	2	0	0	0	16.42	16.5391
CCD86_HUMAN	Q9H6F5	Coiled-coil domain-containing protein 86 OS=Homo sapiens GN=CCDC86 PE=1 SV=1	0.640873	1.55835	0.699474	0.332628			2.68	0.58	0.37832	1	1	1	0	0	0	0	0	0	0	0	0	1	1	1	0	0	0	2	2	2	2	2	2	2	2	2	3	2	2	1	1	1	0	0	0	19.43	16.2209
CARM1_HUMAN	Q86X55	Histone-arginine methyltransferase CARM1 OS=Homo sapiens GN=CARM1 PE=1 SV=3	0.885557	-0.166082	0.125528	0.918575			3.27	0.66	0.122999	1	1	1	0	0	0	0	0	0	0	0	0	1	1	1	0	0	0	4	4	4	1	1	1	2	1	1	3	3	3	4	4	4	0	0	0	15.53	15.6008
ARPC5_HUMAN	O15511	Actin-related protein 2/3 complex subunit 5 OS=Homo sapiens GN=ARPC5 PE=1 SV=3	0.863333	-3.92243	0.661273	0.0620447			2.95	0.74	0.002293	1	1	1	3	3	3	2	2	2	1	1	1	1	1	1	3	3	3	0	0	0	0	0	0	0	0	0	2	2	2	1	1	1	0	0	0	18.56	23.13
PCMD2_HUMAN	Q9NV79	Protein-L-isoaspartate O-methyltransferase domain-containing protein 2 OS=Homo sapiens GN=PCMTD2 PE=2 SV=2	0	0.209265	1	0.876022			2.33	0.57	0.018159	0	0	0	0	0	0	0	0	0	0	0	0	0	0	0	0	0	0	2	2	2	1	1	1	2	2	2	1	1	1	3	3	3	0	0	0	16.458	13.8928
MCES_HUMAN	O43148	mRNA cap guanine-N7 methyltransferase OS=Homo sapiens GN=RNMT PE=1 SV=1	-0.46663	1.53358	0.609438	0.36065			3.12	0.72	0.006716	2	2	2	0	0	0	1	1	1	1	1	1	1	1	1	1	1	1	6	5	5	4	3	3	5	3	3	3	2	2	3	3	3	0	0	0	17.11	16.5601
GYS1_HUMAN	P13807	Glycogen [starch] synthase, muscle OS=Homo sapiens GN=GYS1 PE=1 SV=2	0	2.38086	1	0.222469			2.35	0.44	0.152095	0	0	0	0	0	0	0	0	0	0	0	0	0	0	0	0	0	0	2	2	2	2	2	2	1	1	1	0	0	0	3	3	3	0	0	0	15.4472	14.4124
NTKL_HUMAN	Q96KG9	N-terminal kinase-like protein OS=Homo sapiens GN=SCYL1 PE=1 SV=1	0	-2.71726	1	0.0254751			1.68	0.37	0.075501	0	0	0	0	0	0	0	0	0	0	0	0	0	0	0	0	0	0	0	0	0	0	0	0	0	0	0	1	1	1	2	2	2	0	0	0	15.3505	15.1526
BAG6_HUMAN	P46379	Large proline-rich protein BAG6 OS=Homo sapiens GN=BAG6 PE=1 SV=2	-2.48512	1.26378	0.139539	0.205712			2.45	0.43	0.019693	1	1	1	0	0	0	0	0	0	1	1	1	2	2	2	3	3	3	2	2	2	4	4	4	1	1	1	1	1	1	1	1	1	0	0	0	15.62	15.5189
RBM27_HUMAN	Q9P2N5	RNA-binding protein 27 OS=Homo sapiens GN=RBM27 PE=1 SV=2	-1.70648	0.84811	0.263548	0.352968			2.73	0.68	0.001285	1	1	1	1	1	1	0	0	0	4	4	2	0	0	0	4	4	3	3	3	2	1	1	0	5	5	4	1	1	0	2	2	1	0	0	0	15.54	18.13
BCCIP_HUMAN	Q9P287	BRCA2 and CDKN1A-interacting protein OS=Homo sapiens GN=BCCIP PE=1 SV=1	0	1.47763	1	0.361597			1.84	0.5	0.11391	0	0	0	0	0	0	0	0	0	0	0	0	0	0	0	0	0	0	1	1	1	2	2	2	2	2	2	0	0	0	2	2	2	0	0	0	14.1279	17.7083
U3IP2_HUMAN	O43818	U3 small nucleolar RNA-interacting protein 2 OS=Homo sapiens GN=RRP9 PE=1 SV=1	-1.33667	2.09144	0.446042	0.251405			3.73	0.69	0.06386	1	1	1	1	1	1	1	1	1	1	1	1	1	1	1	3	3	3	3	3	3	4	4	4	2	2	2	2	2	2	1	1	1	0	0	0	18.05	17.42
TES_HUMAN	Q9UGI8	Testin OS=Homo sapiens GN=TES PE=1 SV=1	0	-0.950635	1	0.44898			2.4	0.54	0.543761	0	0	0	0	0	0	0	0	0	0	0	0	0	0	0	0	0	0	0	0	0	1	1	1	1	1	1	2	2	2	1	1	1	0	0	0	16.6356	15.913
GMFB_HUMAN	P60983	Glia maturation factor beta OS=Homo sapiens GN=GMFB PE=1 SV=2	1.39469	-3.16926	0.437816	0.106104			2.65	0.6	0.334092	1	1	1	1	1	1	2	2	2	2	2	1	0	0	0	1	1	1	0	0	0	0	0	0	0	0	0	1	1	1	0	0	0	0	0	0	18.3	20.52
ZFR_HUMAN	Q96KR1	Zinc finger RNA-binding protein OS=Homo sapiens GN=ZFR PE=1 SV=2	-2.28531	0.880852	0.0548722	0.586229			3.36	0.77	0.000334	2	2	2	0	0	0	2	2	2	5	5	5	4	4	4	3	3	3	4	4	4	3	3	3	5	5	5	5	5	5	5	5	5	0	0	0	16.63	15.7841
WDR3_HUMAN	Q9UNX4	WD repeat-containing protein 3 OS=Homo sapiens GN=WDR3 PE=1 SV=1	0.14	2.53437	0.952595	0.0174971			3.61	0.67	0.050363	2	2	2	3	3	3	3	3	3	2	2	2	1	1	1	5	5	5	2	2	2	3	3	3	3	3	3	0	0	0	1	1	1	0	0	0	16.7	21.81
SPAG5_HUMAN	Q96R06	Sperm-associated antigen 5 OS=Homo sapiens GN=SPAG5 PE=1 SV=2	-1.67926	0.762916	0.302697	0.655339			3.68	0.73	0.00827	5	5	5	0	0	0	0	0	0	5	5	5	2	2	2	4	4	4	12	12	12	6	6	6	7	7	7	8	8	8	9	9	9	0	0	0	17.73	15.3712
K1522_HUMAN	Q9P206	Uncharacterized protein KIAA1522 OS=Homo sapiens GN=KIAA1522 PE=1 SV=2	-0.796667	0.374701	0.446062	0.503643		Q9P206	2.41	0.58	0.010085	2	2	2	1	1	1	1	1	1	1	1	1	2	2	2	2	2	2	1	1	1	1	1	1	1	1	1	1	1	1	1	1	1	0	0	0	16.81	16.83
XRCC1_HUMAN	P18887	DNA repair protein XRCC1 OS=Homo sapiens GN=XRCC1 PE=1 SV=2	0.578579	-2.94356	0.791479	0.00863661			2.59	0.54	0.124451	0	0	0	1	1	1	0	0	0	0	0	0	0	0	0	2	2	2	0	0	0	0	0	0	0	0	0	1	1	1	1	1	1	0	0	0	15.9212	20.67
CLCB_HUMAN	P09497	Clathrin light chain B OS=Homo sapiens GN=CLTB PE=1 SV=1	0.566668	-1.23809	0.792392	0.499935			2.04	0.45	0.373218	2	2	2	5	5	5	4	4	4	2	2	2	2	2	2	4	4	4	0	0	0	0	0	0	0	0	0	0	0	0	2	2	2	0	0	0	18.49	23.42
ZFP91_HUMAN	Q96JP5	E3 ubiquitin-protein ligase ZFP91 OS=Homo sapiens GN=ZFP91 PE=1 SV=1	0	0.297688	1	0.768655			3.11	0.62	0.07158	0	0	0	0	0	0	0	0	0	0	0	0	0	0	0	0	0	0	2	2	2	1	1	1	2	2	2	2	2	2	3	3	3	0	0	0	15.9251	14.0684
EXOS9_HUMAN	Q06265	Exosome complex component RRP45 OS=Homo sapiens GN=EXOSC9 PE=1 SV=3	-0.23	3.28913	0.867448	0.0374477			2.71	0.68	0.074523	1	1	1	1	1	1	2	2	2	2	2	2	1	1	1	2	2	2	2	2	2	1	1	1	1	1	1	0	0	0	1	1	1	0	0	0	18.49	21.55
KDM1A_HUMAN	O60341	Lysine-specific histone demethylase 1A OS=Homo sapiens GN=KDM1A PE=1 SV=2	1.19333	1.23498	0.427186	0.401759			2.63	0.67	0.053342	3	3	3	1	1	1	1	1	1	1	1	1	1	1	1	2	2	2	6	6	6	5	5	5	4	4	4	5	5	5	3	3	3	0	0	0	18.42	19.72
HORN_HUMAN	Q86YZ3	Hornerin OS=Homo sapiens GN=HRNR PE=1 SV=2	1.98279	1.4987	0.0606573	0.347921			4.57	0.83	0.011727	10	3	3	0	0	0	5	3	3	2	2	2	4	3	3	1	1	1	20	6	6	20	7	7	22	8	8	17	7	7	11	4	4	0	0	0	17.52	18.1684
CTF18_HUMAN	Q8WVB6	Chromosome transmission fidelity protein 18 homolog OS=Homo sapiens GN=CHTF18 PE=1 SV=1	1.62146	0.56996	0.0915866	0.640498			2.7	0.62	0.006825	0	0	0	1	1	1	1	1	1	0	0	0	0	0	0	0	0	0	3	3	3	2	2	2	3	3	3	4	4	4	4	4	3	0	0	0	17.3007	17.46
ELP3_HUMAN	Q9H9T3	Elongator complex protein 3 OS=Homo sapiens GN=ELP3 PE=1 SV=2	0	-0.873741	1	0.457743			1.91	0.59	0.507455	0	0	0	0	0	0	0	0	0	0	0	0	0	0	0	0	0	0	0	0	0	1	1	1	3	3	3	1	1	1	2	2	2	0	0	0	14.5222	14.0705
TRRAP_HUMAN	Q9Y4A5	Transformation/transcription domain-associated protein OS=Homo sapiens GN=TRRAP PE=1 SV=3	0.8984	0	0.509478	1			2.19	0.61	0.093642	3	3	3	0	0	0	2	2	2	1	1	1	1	1	1	2	2	2	0	0	0	0	0	0	0	0	0	0	0	0	0	0	0	0	0	0	14.37	15.1352
DNJB3_HUMAN	Q8WWF6	DnaJ homolog subfamily B member 3 OS=Homo sapiens GN=DNAJB3 PE=1 SV=1	-0.386667	0	0.730176	1			3.12	0.66	0.232921	1	1	0	1	1	0	2	2	0	2	2	0	2	2	0	2	2	0	0	0	0	0	0	0	0	0	0	0	0	0	0	0	0	0	0	0	18.38	19.68
TF3C4_HUMAN	Q9UKN8	General transcription factor 3C polypeptide 4 OS=Homo sapiens GN=GTF3C4 PE=1 SV=2	-0.569733	1.06423	0.564627	0.528781			3.73	0.7	0.02521	0	0	0	0	0	0	1	1	1	1	1	1	0	0	0	2	2	2	6	6	6	9	9	9	6	6	6	5	5	5	7	7	7	0	0	0	16.6152	16.1932
CO7A1_HUMAN	Q02388	Collagen alpha-1(VII) chain OS=Homo sapiens GN=COL7A1 PE=1 SV=2	0.14	1.76941	0.940774	0.0268353			3.42	0.68	0.009873	4	4	4	15	15	15	17	17	17	6	6	6	11	11	11	11	11	11	5	5	5	7	7	7	6	6	6	1	1	1	2	2	2	0	0	0	15.56	20.23
LYPA2_HUMAN	O95372	Acyl-protein thioesterase 2 OS=Homo sapiens GN=LYPLA2 PE=1 SV=1	-0.47	1.15135	0.474619	0.622354			2.32	0.48	0.005523	3	2	2	1	1	1	1	1	1	3	2	2	2	2	2	1	1	1	3	2	2	3	2	2	3	2	2	3	2	2	3	2	2	0	0	0	19.14	20.99
CLP1_HUMAN	Q92989	Polyribonucleotide 5'-hydroxyl-kinase Clp1 OS=Homo sapiens GN=CLP1 PE=1 SV=1	-0.152823	1.60786	0.920169	0.385349			1.99	0.57	0.069238	0	0	0	0	0	0	1	1	1	0	0	0	0	0	0	0	0	0	3	3	3	5	5	5	3	3	3	1	1	1	3	3	3	0	0	0	14.4043	16.1149
GSDMA_HUMAN	Q96QA5	Gasdermin-A OS=Homo sapiens GN=GSDMA PE=2 SV=4	0.415992	0.503782	0.267219	0.73346			2.12	0.59	0.01293	1	1	1	0	0	0	0	0	0	0	0	0	1	1	1	0	0	0	3	2	2	1	1	1	2	2	2	2	2	2	1	1	1	0	0	0	16.45	15.4505
ADNP_HUMAN	Q9H2P0	Activity-dependent neuroprotector homeobox protein OS=Homo sapiens GN=ADNP PE=1 SV=1	-1.08667	0.939151	0.406753	0.466474			3.37	0.69	0.017481	3	3	3	3	3	3	2	2	2	4	4	4	4	4	4	7	7	7	6	6	6	5	5	5	5	5	5	5	5	5	6	6	6	0	0	0	16.1	18.4
CX056_HUMAN	Q9H5V9	UPF0428 protein CXorf56 OS=Homo sapiens GN=CXorf56 PE=1 SV=1	1.32458	0.141247	0.367033	0.947324			2.55	0.75	0.036634	2	2	2	0	0	0	1	1	1	0	0	0	1	1	1	0	0	0	2	2	2	2	2	2	3	2	2	2	2	2	5	3	3	0	0	0	18.69	15.3823
PROSC_HUMAN	O94903	Proline synthase co-transcribed bacterial homolog protein OS=Homo sapiens GN=PROSC PE=1 SV=1	0.629361	1.76274	0.49468	0.356704			2.02	0.68	0.245214	0	0	0	0	0	0	0	0	0	1	1	1	0	0	0	0	0	0	2	2	2	1	1	1	1	1	1	0	0	0	2	2	2	0	0	0	16.0148	15.7107
EDC4_HUMAN	Q6P2E9	Enhancer of mRNA-decapping protein 4 OS=Homo sapiens GN=EDC4 PE=1 SV=1	-1.24499	0.855308	0.486293	0.470384			3.6	0.62	0.052561	1	1	1	0	0	0	0	0	0	0	0	0	4	4	4	2	2	2	4	4	4	2	2	2	3	3	3	2	2	2	3	3	3	0	0	0	15.47	14.9967
CASPE_HUMAN	P31944	Caspase-14 OS=Homo sapiens GN=CASP14 PE=1 SV=2	-0.831067	1.75202	0.68686	0.340004			2.98	0.68	0.131727	1	1	1	0	0	0	0	0	0	0	0	0	6	6	6	0	0	0	7	4	4	2	2	2	4	2	2	2	2	2	1	1	1	0	0	0	15.74	16.1693
ZN787_HUMAN	Q6DD87	Zinc finger protein 787 OS=Homo sapiens GN=ZNF787 PE=1 SV=2	-1.07379	0.424514	0.107769	0.830589			2.86	0.69	0.393806	0	0	0	0	0	0	0	0	0	0	0	0	1	1	1	0	0	0	2	1	1	3	2	2	1	1	1	3	3	3	2	2	2	0	0	0	14.7615	15.7142
DCC1_HUMAN	Q9BVC3	Sister chromatid cohesion protein DCC1 OS=Homo sapiens GN=DSCC1 PE=1 SV=2	0	1.19007	1	0.505741			2.12	0.6	0.065236	0	0	0	0	0	0	0	0	0	0	0	0	0	0	0	0	0	0	3	3	3	3	3	3	3	3	3	3	3	3	3	3	3	0	0	0	17.4966	15.9434
FABP5_HUMAN	Q01469	Fatty acid-binding protein, epidermal OS=Homo sapiens GN=FABP5 PE=1 SV=3	1.64038	4.57144	0.446439	0.00571451			1.92	0.5	0.342424	0	0	0	1	1	1	0	0	0	0	0	0	0	0	0	0	0	0	2	2	2	1	1	1	1	1	1	0	0	0	0	0	0	0	0	0	15.6737	21.45
ABI1_HUMAN	Q8IZP0	Abl interactor 1 OS=Homo sapiens GN=ABI1 PE=1 SV=4	3.76717	5.08252	0.183863	0.00943286			5.06	0.68	0.057504	6	6	2	0	0	0	1	1	0	0	0	0	0	0	0	0	0	0	9	9	4	6	4	2	10	8	4	1	1	1	0	0	0	0	0	0	22.2	15.1207
SNUT1_HUMAN	O43290	U4/U6.U5 tri-snRNP-associated protein 1 OS=Homo sapiens GN=SART1 PE=1 SV=1	1.29667	2.55586	0.399911	0.219431			3.98	0.73	0.008596	5	5	5	4	4	4	5	5	5	2	2	2	6	6	6	3	3	3	12	11	11	14	12	12	16	15	15	6	6	6	8	8	8	0	0	0	19.46	21.9
DHX8_HUMAN	Q14562	ATP-dependent RNA helicase DHX8 OS=Homo sapiens GN=DHX8 PE=1 SV=1	-1.31349	1.17775	0.485688	0.338071			2.52	0.62	0.078583	0	0	0	0	0	0	0	0	0	0	0	0	2	2	2	4	4	4	4	4	3	2	2	1	3	3	2	1	1	0	3	3	2	0	0	0	14.0406	15.8238
ECT2_HUMAN	Q9H8V3	Protein ECT2 OS=Homo sapiens GN=ECT2 PE=1 SV=4	0.476667	2.17301	0.659429	0.152675	Q9H8V3		4.06	0.74	0.007917	5	5	5	3	3	3	3	3	3	3	3	3	5	5	5	4	4	4	7	7	7	5	5	5	9	9	9	4	4	4	4	4	4	0	0	0	18.4	20.41
TRY1_HUMAN	P07477	Trypsin-1 OS=Homo sapiens GN=PRSS1 PE=1 SV=1	-0.704707	5.85003	0.780592	0.017646			4.33	0.58	0.160612	1	1	0	1	1	0	0	0	0	2	1	0	1	1	0	1	1	0	3	1	0	3	1	0	3	1	0	1	1	0	2	1	0	0	0	0	22.25	20.52
CATD_HUMAN	P07339	Cathepsin D OS=Homo sapiens GN=CTSD PE=1 SV=1	-1.17667	1.06436	0.223113	0.623708			2.41	0.75	0.010214	1	1	1	1	1	1	2	2	2	2	2	2	4	4	4	1	1	1	6	4	4	3	3	3	6	4	4	5	3	3	5	3	3	0	0	0	16.59	18.28
C1D_HUMAN	Q13901	Nuclear nucleic acid-binding protein C1D OS=Homo sapiens GN=C1D PE=1 SV=1	-0.752662	2.53871	0.705581	0.312163			2.33	0.54	0.025594	0	0	0	0	0	0	0	0	0	0	0	0	1	1	1	0	0	0	1	1	1	1	1	1	2	2	2	0	0	0	2	2	2	0	0	0	17.0057	14.1634
C2D1A_HUMAN	Q6P1N0	Coiled-coil and C2 domain-containing protein 1A OS=Homo sapiens GN=CC2D1A PE=1 SV=1	-0.318443	-0.203034	0.405138	0.821555			2.71	0.67	0.000354	1	1	1	0	0	0	0	0	0	0	0	0	0	0	0	0	0	0	2	2	2	0	0	0	1	1	1	1	1	1	1	1	1	0	0	0	14.18	15.1944
F203B_HUMAN	P0CB43	Protein FAM203B OS=Homo sapiens GN=FAM203B PE=3 SV=1	0	-1.0753	1	0.518875			1.98	0.54	0.172977	0	0	0	0	0	0	0	0	0	0	0	0	0	0	0	0	0	0	0	0	0	1	1	0	2	2	0	4	4	0	2	2	0	0	0	0	16.5911	15.6821
SGOL2_HUMAN	Q562F6	Shugoshin-like 2 OS=Homo sapiens GN=SGOL2 PE=1 SV=2	-0.836667	0	0.184957	1			4.64	0.74	0.058921	20	16	16	3	3	3	5	5	5	18	15	15	19	16	16	5	5	5	0	0	0	0	0	0	0	0	0	0	0	0	0	0	0	0	0	0	20.29	18.73
IVD_HUMAN	P26440	Isovaleryl-CoA dehydrogenase, mitochondrial OS=Homo sapiens GN=IVD PE=1 SV=1	1.7047	2.77206	0.638514	0.0452577			3.27	0.59	0.021148	0	0	0	11	8	8	0	0	0	0	0	0	0	0	0	2	2	2	0	0	0	2	2	2	2	2	2	0	0	0	0	0	0	0	0	0	15.952	25.31
OAS3_HUMAN	Q9Y6K5	2'-5'-oligoadenylate synthase 3 OS=Homo sapiens GN=OAS3 PE=1 SV=3	0	1.49725	1	0.160126			1.87	0.54	0.018757	0	0	0	0	0	0	0	0	0	0	0	0	0	0	0	0	0	0	4	4	4	2	2	2	1	1	1	1	1	1	1	1	1	0	0	0	15.4358	17.0147
TOX4_HUMAN	O94842	TOX high mobility group box family member 4 OS=Homo sapiens GN=TOX4 PE=1 SV=1	-2.06057	0.944792	0.152312	0.524477			2.58	0.68	0.24423	0	0	0	0	0	0	0	0	0	1	1	0	1	1	0	0	0	0	1	1	0	1	1	0	2	2	1	2	2	1	1	1	0	0	0	0	14.5555	14.5698
TF3C3_HUMAN	Q9Y5Q9	General transcription factor 3C polypeptide 3 OS=Homo sapiens GN=GTF3C3 PE=1 SV=1	0.508793	1.05373	0.720486	0.527225			2.92	0.57	0.008159	2	2	2	0	0	0	0	0	0	0	0	0	1	1	1	0	0	0	3	3	3	4	4	4	6	6	6	5	5	5	5	5	5	0	0	0	18.69	16.6972
C1TM_HUMAN	Q6UB35	Monofunctional C1-tetrahydrofolate synthase, mitochondrial OS=Homo sapiens GN=MTHFD1L PE=1 SV=1	1.77514	2.76567	0.578144	0.0436609			3.9	0.71	0.03262	0	0	0	12	11	11	0	0	0	0	0	0	0	0	0	2	2	1	1	1	1	3	3	3	5	5	5	1	1	1	0	0	0	0	0	0	16.8999	24.08
FN3K_HUMAN	Q9H479	Fructosamine-3-kinase OS=Homo sapiens GN=FN3K PE=1 SV=1	-0.493334	1.67366	0.536872	0.349157			3.88	0.68	0.03199	2	2	2	1	1	1	2	2	2	2	2	2	4	4	4	3	3	3	3	3	3	3	3	3	4	4	4	2	1	1	2	2	2	0	0	0	18.42	19.81
LS14A_HUMAN	Q8ND56	Protein LSM14 homolog A OS=Homo sapiens GN=LSM14A PE=1 SV=3	-0.0931444	-1.54967	0.894295	0.406081			1.84	0.44	0.149916	1	1	1	0	0	0	0	0	0	0	0	0	0	0	0	0	0	0	1	1	1	1	1	1	2	1	1	3	3	3	2	2	2	0	0	0	15.61	17.2482
SLFN5_HUMAN	Q08AF3	Schlafen family member 5 OS=Homo sapiens GN=SLFN5 PE=1 SV=1	-1.05482	0.180355	0.25343	0.809772			2.14	0.53	0.068039	1	1	1	0	0	0	0	0	0	1	1	1	1	1	1	1	1	1	1	1	1	1	1	1	3	3	3	1	1	1	1	1	1	0	0	0	15.49	14.6768
SC23A_HUMAN	Q15436	Protein transport protein Sec23A OS=Homo sapiens GN=SEC23A PE=1 SV=2	-1.708	2.34632	0.155323	0.227343			3.86	0.7	0.028436	1	1	1	0	0	0	0	0	0	1	1	1	1	1	1	1	1	1	2	2	2	5	5	5	2	2	2	0	0	0	3	2	2	0	0	0	17.23	15.8176
CDD_HUMAN	P32320	Cytidine deaminase OS=Homo sapiens GN=CDA PE=1 SV=2	1.70667	2.8388	0.160871	0.389035			2.39	0.66	0.011421	2	1	1	1	1	1	2	1	1	2	1	1	4	1	1	1	1	1	1	1	1	2	1	1	2	1	1	2	1	1	1	1	1	0	0	0	23.57	23.6
CSK_HUMAN	P41240	Tyrosine-protein kinase CSK OS=Homo sapiens GN=CSK PE=1 SV=1	0	1.33209	1	0.537901			3.25	0.69	0.000716	0	0	0	0	0	0	0	0	0	0	0	0	0	0	0	0	0	0	7	7	7	6	6	5	6	6	5	6	6	6	7	7	7	0	0	0	14.165	16.5231
ZN326_HUMAN	Q5BKZ1	DBIRD complex subunit ZNF326 OS=Homo sapiens GN=ZNF326 PE=1 SV=2	-0.908882	0.818398	0.598403	0.512201			3.17	0.66	0.001542	0	0	0	0	0	0	1	1	1	0	0	0	1	1	1	1	1	1	1	1	1	2	2	2	2	2	2	2	2	2	1	1	1	0	0	0	17.0353	14.3088
PCMD1_HUMAN	Q96MG8	Protein-L-isoaspartate O-methyltransferase domain-containing protein 1 OS=Homo sapiens GN=PCMTD1 PE=2 SV=2	1.39061	1.31861	0.11157	0.537514			2.07	0.66	0.000506	0	0	0	0	0	0	1	1	1	0	0	0	0	0	0	0	0	0	3	3	3	5	5	5	4	4	4	3	3	3	4	4	4	0	0	0	15.7789	17.6394
SNX2_HUMAN	O60749	Sorting nexin-2 OS=Homo sapiens GN=SNX2 PE=1 SV=2	0.415089	0	0.784225	1			3.67	0.59	0.358414	1	1	0	1	1	1	1	1	1	0	0	0	2	2	1	1	1	1	0	0	0	0	0	0	0	0	0	0	0	0	0	0	0	0	0	0	17.18	18.71
STT3B_HUMAN	Q8TCJ2	Dolichyl-diphosphooligosaccharide--protein glycosyltransferase subunit STT3B OS=Homo sapiens GN=STT3B PE=1 SV=1	0.965499	0	0.72542	1			5.1	0.78	0.009937	0	0	0	13	8	6	8	8	8	2	2	2	2	2	2	12	7	5	0	0	0	0	0	0	0	0	0	0	0	0	0	0	0	0	0	0	17.8465	24.02
MVP_HUMAN	Q14764	Major vault protein OS=Homo sapiens GN=MVP PE=1 SV=4	1.13499	-0.939049	0.49935	0.187907			3.53	0.67	0.031088	2	2	2	1	1	1	2	2	2	0	0	0	2	2	2	2	2	2	0	0	0	0	0	0	0	0	0	1	1	1	1	1	1	0	0	0	17.63	20.21
PXDN_HUMAN	Q92626	Peroxidasin homolog OS=Homo sapiens GN=PXDN PE=1 SV=2	-0.883333	1.80948	0.407892	0.270078			3.29	0.67	0.000696	5	5	5	3	3	3	4	4	4	6	6	6	7	7	7	8	8	8	11	11	11	9	9	9	9	9	9	4	4	4	10	10	10	0	0	0	17.12	18.5
SAP_HUMAN	P07602	Proactivator polypeptide OS=Homo sapiens GN=PSAP PE=1 SV=2	0.817614	4.70827	0.655909	0.0304287			3.07	0.6	0.176832	0	0	0	1	1	1	0	0	0	0	0	0	0	0	0	2	2	2	2	2	2	1	1	1	1	1	1	0	0	0	0	0	0	0	0	0	17.6417	20.46
NU153_HUMAN	P49790	Nuclear pore complex protein Nup153 OS=Homo sapiens GN=NUP153 PE=1 SV=2	-0.356667	4.26871	0.79258	0.0605296			4.52	0.79	0.01636	7	5	5	8	8	8	2	1	1	7	6	6	5	5	5	6	5	5	24	21	21	19	18	18	29	25	25	8	7	7	8	8	8	0	0	0	18.24	20.58
XPO5_HUMAN	Q9HAV4	Exportin-5 OS=Homo sapiens GN=XPO5 PE=1 SV=1	-0.743958	0.547972	0.416	0.660736			3.27	0.62	0.02562	1	1	1	0	0	0	0	0	0	0	0	0	0	0	0	1	1	1	3	3	3	2	2	2	2	2	2	2	2	2	3	3	3	0	0	0	15.68	16.4834
GLOD4_HUMAN	Q9HC38	Glyoxalase domain-containing protein 4 OS=Homo sapiens GN=GLOD4 PE=1 SV=1	0.123333	0.65189	0.834874	0.782542			3.08	0.72	0.095745	5	5	5	1	1	1	2	2	2	3	3	3	4	4	4	2	2	2	4	4	4	6	5	5	5	5	5	6	6	6	5	5	5	0	0	0	19.13	20.16
TCOF_HUMAN	Q13428	Treacle protein OS=Homo sapiens GN=TCOF1 PE=1 SV=3	0.996667	2.04341	0.491837	0.0102498			3.08	0.65	0.005758	5	5	5	2	2	2	2	2	2	1	1	1	1	1	1	3	3	3	2	2	2	2	2	2	3	3	3	0	0	0	1	1	1	0	0	0	17.65	19.6
AT2A2_HUMAN	P16615	Sarcoplasmic/endoplasmic reticulum calcium ATPase 2 OS=Homo sapiens GN=ATP2A2 PE=1 SV=1	-0.52999	2.05852	0.889308	0.0123514			5.15	0.72	0.010636	0	0	0	34	23	14	11	8	6	5	5	4	4	4	2	30	19	12	1	1	1	3	3	3	2	2	0	0	0	0	0	0	0	0	0	0	15.33	25.61
BGH3_HUMAN	Q15582	Transforming growth factor-beta-induced protein ig-h3 OS=Homo sapiens GN=TGFBI PE=1 SV=1	0	1.6505	1	0.119412			3.06	0.68	0.122455	0	0	0	0	0	0	0	0	0	0	0	0	0	0	0	0	0	0	3	3	3	2	2	2	3	3	3	1	1	1	1	1	1	0	0	0	14.7263	16.3667
PSMD5_HUMAN	Q16401	26S proteasome non-ATPase regulatory subunit 5 OS=Homo sapiens GN=PSMD5 PE=1 SV=3	-0.3891	0.0118446	0.732063	0.995884			3.44	0.69	0.073683	1	1	1	0	0	0	1	1	1	0	0	0	1	1	1	1	1	1	1	1	1	5	5	5	5	5	5	5	5	5	7	6	6	0	0	0	16.67	16.859
TPP2_HUMAN	P29144	Tripeptidyl-peptidase 2 OS=Homo sapiens GN=TPP2 PE=1 SV=4	-1.67703	1.00915	0.397768	0.525433			2.64	0.61	0.060228	1	1	1	1	1	1	0	0	0	0	0	0	2	2	2	8	8	8	6	6	6	6	5	5	4	4	4	6	6	6	4	4	4	0	0	0	15.06	17.18
GRSF1_HUMAN	Q12849	G-rich sequence factor 1 OS=Homo sapiens GN=GRSF1 PE=1 SV=3	0.71829	4.10363	0.853043	0.00538322			4.33	0.64	0.093694	0	0	0	6	6	6	0	0	0	0	0	0	1	1	1	2	2	2	2	2	2	4	4	4	4	4	4	0	0	0	1	1	1	0	0	0	14.208	24.55
HELLS_HUMAN	Q9NRZ9	Lymphoid-specific helicase OS=Homo sapiens GN=HELLS PE=1 SV=1	0.62233	1.55304	0.688599	0.410302			2.71	0.59	0.002683	4	4	4	0	0	0	1	1	1	0	0	0	0	0	0	1	1	1	8	8	8	4	4	4	7	7	7	4	4	4	5	5	5	0	0	0	18.57	14.3605
CTBL1_HUMAN	Q8WYA6	Beta-catenin-like protein 1 OS=Homo sapiens GN=CTNNBL1 PE=1 SV=1	0.883333	-0.323837	0.578212	0.744163			4.24	0.62	0.042645	2	2	2	2	2	2	2	2	2	1	1	1	2	2	2	2	2	2	0	0	0	1	1	1	0	0	0	0	0	0	0	0	0	0	0	0	18.67	21.24
CRNL1_HUMAN	Q9BZJ0	Crooked neck-like protein 1 OS=Homo sapiens GN=CRNKL1 PE=1 SV=4	-0.21059	1.89336	0.682317	0.194844			2.73	0.68	0.002259	0	0	0	0	0	0	1	1	1	2	2	2	2	2	2	1	1	1	5	5	5	5	5	5	4	4	4	4	4	4	2	2	2	0	0	0	16.4387	17.0795
AGRIN_HUMAN	O00468	Agrin OS=Homo sapiens GN=AGRN PE=1 SV=4	0.312384	0.218287	0.713802	0.436259			2.95	0.54	0.051601	1	1	1	0	0	0	1	1	1	0	0	0	1	1	1	0	0	0	1	1	1	1	1	1	1	1	1	0	0	0	2	2	2	0	0	0	13.97	16.1405
1B78_HUMAN	P30498	HLA class I histocompatibility antigen, B-78 alpha chain OS=Homo sapiens GN=HLA-B PE=2 SV=1	0.477147	3.08068	0.884716	0.026524			4.99	0.71	0.193652	0	0	0	4	4	0	3	3	0	0	0	0	0	0	0	3	3	0	0	0	0	1	1	0	1	1	0	0	0	0	0	0	0	0	0	0	15.3012	23.76
RU1C_HUMAN	P09234	U1 small nuclear ribonucleoprotein C OS=Homo sapiens GN=SNRPC PE=1 SV=1	1.88611	0	0.539359	1			3.22	0.6	0.497752	1	1	1	3	3	3	1	1	1	1	1	1	0	0	0	2	2	2	0	0	0	0	0	0	0	0	0	0	0	0	0	0	0	0	0	0	18.62	23.46
ESPL1_HUMAN	Q14674	Separin OS=Homo sapiens GN=ESPL1 PE=1 SV=3	2.80192	1.26159	0.000834515	0.140393	Q14674		2.77	0.64	0.131855	5	5	5	2	2	2	5	5	5	1	1	1	2	2	2	0	0	0	2	2	2	2	2	2	7	7	7	1	1	1	2	2	2	0	0	0	17.05	17.07
DECR2_HUMAN	Q9NUI1	Peroxisomal 2,4-dienoyl-CoA reductase OS=Homo sapiens GN=DECR2 PE=1 SV=1	1.21	1.21851	0.181905	0.60372			2.6	0.68	0.027494	3	3	3	1	1	1	3	3	3	1	1	1	2	2	2	1	1	1	4	4	4	4	4	4	4	4	4	4	4	4	4	4	4	0	0	0	19.1	20.56
INP5K_HUMAN	Q9BT40	Inositol polyphosphate 5-phosphatase K OS=Homo sapiens GN=INPP5K PE=1 SV=3	3.26306	0	0.0593884	1			2.6	0.59	0.135173	0	0	0	1	1	1	2	1	1	0	0	0	0	0	0	0	0	0	0	0	0	0	0	0	0	0	0	0	0	0	0	0	0	0	0	0	17.3215	20.79
EFTS_HUMAN	P43897	Elongation factor Ts, mitochondrial OS=Homo sapiens GN=TSFM PE=1 SV=2	1.65649	2.41563	0.683909	0.0270075			5.9	0.73	0.017835	0	0	0	12	9	9	0	0	0	0	0	0	0	0	0	3	3	3	1	1	1	1	1	1	1	1	1	0	0	0	0	0	0	0	0	0	16.1423	25.56
RING2_HUMAN	Q99496	E3 ubiquitin-protein ligase RING2 OS=Homo sapiens GN=RNF2 PE=1 SV=1	0	0.745115	1	0.630572			2.61	0.64	0.12501	0	0	0	0	0	0	0	0	0	0	0	0	0	0	0	0	0	0	2	2	1	1	1	0	1	1	0	1	1	1	2	2	1	0	0	0	13.8241	15.4147
SYF1_HUMAN	Q9HCS7	Pre-mRNA-splicing factor SYF1 OS=Homo sapiens GN=XAB2 PE=1 SV=2	-0.713333	1.57727	0.527061	0.44798			3.47	0.69	0.000374	5	5	5	1	1	1	2	2	2	3	3	3	2	2	2	3	3	3	9	9	9	13	13	13	12	12	12	9	8	8	10	10	10	0	0	0	18.4	18.35
NOL8_HUMAN	Q76FK4	Nucleolar protein 8 OS=Homo sapiens GN=NOL8 PE=1 SV=1	-0.291187	0	0.843237	1			3.4	0.68	0.107464	0	0	0	1	1	1	2	2	2	0	0	0	0	0	0	6	6	6	0	0	0	0	0	0	0	0	0	0	0	0	0	0	0	0	0	0	17.4442	17.79
TF3C5_HUMAN	Q9Y5Q8	General transcription factor 3C polypeptide 5 OS=Homo sapiens GN=GTF3C5 PE=1 SV=2	-1.39547	0.878395	0.124929	0.699977			3.02	0.66	0.001905	3	3	3	0	0	0	0	0	0	2	2	2	3	3	3	1	1	1	7	6	6	6	6	6	12	8	8	7	7	7	9	9	9	0	0	0	18.47	16.4007
NU133_HUMAN	Q8WUM0	Nuclear pore complex protein Nup133 OS=Homo sapiens GN=NUP133 PE=1 SV=2	0.136718	1.47082	0.740776	0.129048			2.54	0.55	0.074162	0	0	0	0	0	0	1	1	1	1	1	1	0	0	0	1	1	1	2	2	2	4	4	4	3	3	3	1	1	1	2	2	2	0	0	0	15.9239	15.4879
CH059_HUMAN	Q8N0T1	Uncharacterized protein C8orf59 OS=Homo sapiens GN=C8orf59 PE=1 SV=2	1.84877	0.751075	0.0933007	0.670182			1.76	0.53	0.06172	1	1	1	0	0	0	0	0	0	0	0	0	1	1	1	0	0	0	1	1	1	2	2	2	1	1	1	2	2	2	2	2	2	0	0	0	17.54	17.5328
PP4C_HUMAN	P60510	Serine/threonine-protein phosphatase 4 catalytic subunit OS=Homo sapiens GN=PPP4C PE=1 SV=1	-0.911673	0.979296	0.523406	0.47097			2.05	0.59	0.131907	0	0	0	0	0	0	1	1	1	0	0	0	0	0	0	2	2	2	2	2	2	2	2	2	3	3	3	1	1	1	2	2	2	0	0	0	15.5957	16.062
MAP1S_HUMAN	Q66K74	Microtubule-associated protein 1S OS=Homo sapiens GN=MAP1S PE=1 SV=2	-1.1377	2.03119	0.15626	0.172765			2.8	0.62	0.005085	0	0	0	1	1	1	1	1	1	3	3	3	3	3	3	1	1	1	4	4	4	5	5	5	5	5	5	2	2	2	4	4	4	0	0	0	15.1969	16.82
TEX10_HUMAN	Q9NXF1	Testis-expressed sequence 10 protein OS=Homo sapiens GN=TEX10 PE=1 SV=2	0.684447	1.92411	0.760393	0.0273613			4.72	0.75	0.006019	0	0	0	1	1	1	1	1	1	1	1	1	0	0	0	2	2	2	2	2	2	1	1	1	0	0	0	0	0	0	0	0	0	0	0	0	15.0764	19.44
SH3G2_HUMAN	Q99962	Endophilin-A1 OS=Homo sapiens GN=SH3GL2 PE=1 SV=1	0	0.439023	1	0.843922			2.32	0.59	0.179723	0	0	0	0	0	0	0	0	0	0	0	0	0	0	0	0	0	0	3	3	0	1	1	0	2	2	0	2	2	0	4	3	0	0	0	0	15.1566	16.3119
MSH2_HUMAN	P43246	DNA mismatch repair protein Msh2 OS=Homo sapiens GN=MSH2 PE=1 SV=1	-0.834265	1.8327	0.582363	0.236247			2.59	0.58	0.038974	1	1	1	0	0	0	0	0	0	1	1	1	1	1	1	2	2	2	2	2	2	5	5	5	4	4	4	2	2	2	3	3	3	0	0	0	16.67	17.8106
NELFD_HUMAN	Q8IXH7	Negative elongation factor C/D OS=Homo sapiens GN=TH1L PE=1 SV=2	0	1.22032	1	0.565412			2.17	0.58	0.259123	0	0	0	0	0	0	0	0	0	0	0	0	0	0	0	0	0	0	1	1	1	0	0	0	1	1	1	0	0	0	4	4	4	0	0	0	17.2751	16.5269
ABI2_HUMAN	Q9NYB9	Abl interactor 2 OS=Homo sapiens GN=ABI2 PE=1 SV=1	4.0455	7.20381	0.0930216	0.000205375			4.52	0.68	0.057504	5	5	1	0	0	0	2	2	1	0	0	0	0	0	0	0	0	0	7	7	2	2	2	0	9	6	2	0	0	0	0	0	0	0	0	0	21.58	16.0797
MET16_HUMAN	Q86W50	Methyltransferase-like protein 16 OS=Homo sapiens GN=METTL16 PE=1 SV=2	0	1.92159	1	0.129354			2.22	0.41	0.014272	0	0	0	0	0	0	0	0	0	0	0	0	0	0	0	0	0	0	1	1	1	1	1	1	2	2	2	1	1	1	0	0	0	0	0	0	14.6472	16.7669
PTER_HUMAN	Q96BW5	Phosphotriesterase-related protein OS=Homo sapiens GN=PTER PE=1 SV=1	0.321158	3.55981	0.665	0.161279			2.47	0.67	0.000734	1	1	1	0	0	0	1	1	1	1	1	1	1	1	1	0	0	0	2	2	2	5	5	5	4	4	4	0	0	0	3	3	3	0	0	0	17.1	16.9106
PQBP1_HUMAN	O60828	Polyglutamine-binding protein 1 OS=Homo sapiens GN=PQBP1 PE=1 SV=1	-0.0745316	0	0.975711	1			3.68	0.71	0.100886	0	0	0	1	1	1	2	2	2	1	1	1	1	1	1	2	2	2	0	0	0	0	0	0	0	0	0	0	0	0	0	0	0	0	0	0	16.3364	20.36
TRY2_HUMAN	P07478	Trypsin-2 OS=Homo sapiens GN=PRSS2 PE=1 SV=1	-0.86203	6.15408	0.746603	0.0254835			4.33	0.58	0.160612	1	1	0	1	1	0	0	0	0	2	1	0	1	1	0	1	1	0	3	1	0	3	1	0	3	1	0	1	1	0	2	1	0	0	0	0	22.66	20.94
DDX42_HUMAN	Q86XP3	ATP-dependent RNA helicase DDX42 OS=Homo sapiens GN=DDX42 PE=1 SV=1	-1.45105	1.4502	0.3382	0.0276115			4.41	0.76	0.050683	1	1	1	1	1	1	0	0	0	0	0	0	0	0	0	3	3	3	1	1	1	2	2	2	1	1	1	0	0	0	0	0	0	0	0	0	16.42	18.55
F105B_HUMAN	Q96BN8	Protein FAM105B OS=Homo sapiens GN=FAM105B PE=1 SV=3	0	0.8919	1	0.664062			2.56	0.61	0.029105	0	0	0	0	0	0	0	0	0	0	0	0	0	0	0	0	0	0	2	2	2	3	3	3	2	2	2	3	3	3	2	2	2	0	0	0	15.0907	15.8607
AP1M1_HUMAN	Q9BXS5	AP-1 complex subunit mu-1 OS=Homo sapiens GN=AP1M1 PE=1 SV=3	0	0.188838	1	0.920569			1.97	0.62	0.075964	0	0	0	0	0	0	0	0	0	0	0	0	0	0	0	0	0	0	1	1	0	4	4	1	3	3	0	3	3	1	3	3	1	0	0	0	15.3394	16.689
SF3B5_HUMAN	Q9BWJ5	Splicing factor 3B subunit 5 OS=Homo sapiens GN=SF3B5 PE=1 SV=1	0.556667	-2.74468	0.79598	0.166651			4.44	0.74	0.033072	1	1	1	2	2	2	2	2	2	1	1	1	1	1	1	3	2	2	0	0	0	0	0	0	0	0	0	0	0	0	1	1	1	0	0	0	19.52	23.75
DHX36_HUMAN	Q9H2U1	Probable ATP-dependent RNA helicase DHX36 OS=Homo sapiens GN=DHX36 PE=1 SV=2	0.640001	2.17583	0.670244	0.0129251			4.04	0.66	0.004721	4	4	2	5	5	5	4	4	4	2	2	2	4	4	3	5	5	5	2	2	1	3	3	3	3	3	3	1	1	1	1	1	1	0	0	0	18.83	21.51
AL3A2_HUMAN	P51648	Fatty aldehyde dehydrogenase OS=Homo sapiens GN=ALDH3A2 PE=1 SV=1	-1.3	1.79402	0.312869	0.483035			3.26	0.71	0.005234	3	3	2	1	1	1	1	1	1	2	2	2	5	5	4	3	3	3	5	5	5	7	6	5	9	8	7	6	6	5	8	8	7	0	0	0	18.73	20.82
DPP3_HUMAN	Q9NY33	Dipeptidyl peptidase 3 OS=Homo sapiens GN=DPP3 PE=1 SV=2	0	0.422615	1	0.796011			2.26	0.6	0.146565	0	0	0	0	0	0	0	0	0	0	0	0	0	0	0	0	0	0	0	0	0	1	1	1	1	1	1	2	2	2	0	0	0	0	0	0	15.4768	15.1921
NSF1C_HUMAN	Q9UNZ2	NSFL1 cofactor p47 OS=Homo sapiens GN=NSFL1C PE=1 SV=2	0	0.155123	1	0.922154			3.23	0.69	0.124162	0	0	0	0	0	0	0	0	0	0	0	0	0	0	0	0	0	0	0	0	0	2	2	2	3	3	3	2	2	2	1	1	1	0	0	0	15.6676	14.7423
IFT81_HUMAN	Q8WYA0	Intraflagellar transport protein 81 homolog OS=Homo sapiens GN=IFT81 PE=1 SV=1	0	0.829881	1	0.37227			1.86	0.33	0.177711	0	0	0	0	0	0	0	0	0	0	0	0	0	0	0	0	0	0	1	1	1	1	1	1	2	1	1	0	0	0	1	1	1	0	0	0	16.5239	15.3946
AP1M2_HUMAN	Q9Y6Q5	AP-1 complex subunit mu-2 OS=Homo sapiens GN=AP1M2 PE=1 SV=4	0	0.411614	1	0.815423			1.97	0.62	0.075964	0	0	0	0	0	0	0	0	0	0	0	0	0	0	0	0	0	0	1	1	0	3	3	0	3	3	0	2	2	0	2	2	0	0	0	0	15.8355	15.9489
CPSF4_HUMAN	O95639	Cleavage and polyadenylation specificity factor subunit 4 OS=Homo sapiens GN=CPSF4 PE=1 SV=1	-1.89255	3.85062	0.15194	0.00238251			2.3	0.68	0.034837	1	1	1	0	0	0	1	1	1	1	1	1	3	3	3	1	1	1	1	1	1	1	1	1	1	1	1	0	0	0	0	0	0	0	0	0	15.72	15.5423
SRSF9_HUMAN	Q13242	Serine/arginine-rich splicing factor 9 OS=Homo sapiens GN=SRSF9 PE=1 SV=1	0.403333	-1.78198	0.823158	0.432202			2.64	0.65	0.007466	8	6	6	9	7	7	11	8	8	7	5	5	10	8	8	8	7	7	0	0	0	1	1	1	2	2	2	2	2	2	4	4	4	0	0	0	20.61	24.88
PPIC_HUMAN	P45877	Peptidyl-prolyl cis-trans isomerase C OS=Homo sapiens GN=PPIC PE=1 SV=1	3.21358	-3.94534	0.25486	0.0581277			2.9	0.66	0.060694	3	3	3	2	2	2	2	2	2	0	0	0	0	0	0	1	1	1	0	0	0	0	0	0	0	0	0	1	1	1	2	2	2	0	0	0	19.18	23.1
ECHB_HUMAN	P55084	Trifunctional enzyme subunit beta, mitochondrial OS=Homo sapiens GN=HADHB PE=1 SV=3	2.54641	6.06894	0.606651	0.00277426			5.64	0.8	0.000446	0	0	0	38	28	28	7	6	6	0	0	0	2	2	2	18	16	16	5	5	5	12	12	12	11	11	11	0	0	0	1	1	1	0	0	0	16.5557	28.46
TF3C2_HUMAN	Q8WUA4	General transcription factor 3C polypeptide 2 OS=Homo sapiens GN=GTF3C2 PE=1 SV=2	0.313456	1.09598	0.737535	0.548424			2.94	0.62	0.040799	1	1	1	1	1	1	1	1	1	0	0	0	1	1	1	1	1	1	5	4	4	2	2	2	4	4	4	5	5	4	4	4	4	0	0	0	17	18.1
PK3C3_HUMAN	Q8NEB9	Phosphatidylinositol 3-kinase catalytic subunit type 3 OS=Homo sapiens GN=PIK3C3 PE=1 SV=1	-2.34667	1.55955	0.457236	0.0426536			2.05	0.32	0.559258	1	1	0	2	1	0	2	1	0	2	1	0	1	1	0	2	1	0	1	1	0	0	0	0	0	0	0	0	0	0	0	0	0	0	0	0	14.42	17.73
FBX21_HUMAN	O94952	F-box only protein 21 OS=Homo sapiens GN=FBXO21 PE=2 SV=2	0.865418	2.11106	0.504459	0.212263			2.16	0.57	0.112103	0	0	0	0	0	0	1	1	1	0	0	0	0	0	0	0	0	0	3	3	3	2	2	2	3	3	3	1	1	1	2	2	2	0	0	0	17.8363	15.1238
DPOD1_HUMAN	P28340	DNA polymerase delta catalytic subunit OS=Homo sapiens GN=POLD1 PE=1 SV=2	0.298837	0.733094	0.276788	0.620174			2.72	0.61	0.055067	1	1	1	0	0	0	0	0	0	1	1	1	0	0	0	0	0	0	4	4	4	3	3	3	3	3	3	4	4	4	5	5	5	0	0	0	15.63	15.2371
FLII_HUMAN	Q13045	Protein flightless-1 homolog OS=Homo sapiens GN=FLII PE=1 SV=2	-0.0397739	1.41245	0.988927	0.0329949			2.34	0.58	0.049894	0	0	0	4	4	4	1	1	1	1	1	1	2	2	2	3	3	3	1	1	1	2	2	2	1	1	1	0	0	0	1	1	1	0	0	0	15.2307	20.2
NELFB_HUMAN	Q8WX92	Negative elongation factor B OS=Homo sapiens GN=COBRA1 PE=1 SV=1	0.833841	2.42482	0.149778	0.13923			2.48	0.59	0.028873	2	2	2	0	0	0	0	0	0	1	1	1	1	1	1	0	0	0	3	3	3	2	2	2	1	1	1	1	1	1	0	0	0	0	0	0	17.15	16.0749
TRM1L_HUMAN	Q7Z2T5	TRMT1-like protein OS=Homo sapiens GN=TRMT1L PE=1 SV=2	0.618526	0.896569	0.316651	0.642261			3.25	0.71	0.015583	3	3	3	0	0	0	1	1	1	3	3	3	0	0	0	0	0	0	4	4	4	3	3	3	5	5	5	5	5	5	6	6	6	0	0	0	17.65	17.4559
EHMT1_HUMAN	Q9H9B1	Histone-lysine N-methyltransferase EHMT1 OS=Homo sapiens GN=EHMT1 PE=1 SV=4	0.884241	0.558316	0.299128	0.473073			1.68	0.52	0.045414	0	0	0	0	0	0	0	0	0	1	1	1	0	0	0	1	1	1	2	2	2	1	1	1	2	2	2	1	1	1	2	2	2	0	0	0	16.435	17.1356
WDR33_HUMAN	Q9C0J8	pre-mRNA 3' end processing protein WDR33 OS=Homo sapiens GN=WDR33 PE=1 SV=2	-1.16692	0.813665	0.373686	0.252286			2.08	0.43	0.258457	1	1	1	0	0	0	1	1	1	2	2	2	1	1	1	2	2	2	2	2	2	1	1	1	0	0	0	1	1	1	0	0	0	0	0	0	15.25	15.8392
SC61B_HUMAN	P60468	Protein transport protein Sec61 subunit beta OS=Homo sapiens GN=SEC61B PE=1 SV=2	2.0647	0	0.640948	1			2.62	0.57	0.286008	1	1	1	3	3	3	1	1	1	1	1	1	0	0	0	4	3	3	0	0	0	0	0	0	0	0	0	0	0	0	0	0	0	0	0	0	18.73	26.54
RCN2_HUMAN	Q14257	Reticulocalbin-2 OS=Homo sapiens GN=RCN2 PE=1 SV=1	1.04667	-2.90487	0.514268	0.159848			5.16	0.81	0.011124	9	8	8	13	9	9	16	10	10	6	5	5	11	9	9	11	7	7	0	0	0	0	0	0	1	1	1	1	1	1	1	1	1	0	0	0	22.79	26.64
EXOSX_HUMAN	Q01780	Exosome component 10 OS=Homo sapiens GN=EXOSC10 PE=1 SV=2	0.283333	2.32443	0.832437	0.282938			3.79	0.69	0.015258	2	2	2	3	3	3	2	2	2	4	4	4	2	2	2	2	2	2	13	13	13	6	6	6	13	13	13	8	8	8	6	6	6	0	0	0	17.27	20.09
CD2B2_HUMAN	O95400	CD2 antigen cytoplasmic tail-binding protein 2 OS=Homo sapiens GN=CD2BP2 PE=1 SV=1	0	1.68102	1	0.525304			2.51	0.68	0.0003	0	0	0	0	0	0	0	0	0	0	0	0	0	0	0	0	0	0	4	4	4	2	2	2	3	3	3	3	3	3	2	2	2	0	0	0	16.4657	15.9693
MIF_HUMAN	P14174	Macrophage migration inhibitory factor OS=Homo sapiens GN=MIF PE=1 SV=4	2.2103	-3.48279	0.211124	0.139221			2.18	0.7	0.088494	2	2	2	1	1	1	1	1	1	1	1	1	2	2	2	0	0	0	0	0	0	0	0	0	0	0	0	2	2	2	2	2	2	0	0	0	18.93	22.35
REXO4_HUMAN	Q9GZR2	RNA exonuclease 4 OS=Homo sapiens GN=REXO4 PE=1 SV=2	-0.619655	2.85884	0.781547	0.000764567			2.75	0.6	0.116552	0	0	0	1	1	1	1	1	1	1	1	1	0	0	0	3	3	3	1	1	1	1	1	1	1	1	1	0	0	0	0	0	0	0	0	0	15.189	19.29
ISY1_HUMAN	Q9ULR0	Pre-mRNA-splicing factor ISY1 homolog OS=Homo sapiens GN=ISY1 PE=1 SV=3	-0.253847	0.44267	0.719158	0.809386			2.99	0.71	0.299242	2	2	2	0	0	0	0	0	0	1	1	1	1	1	1	0	0	0	2	2	2	1	1	1	2	2	2	2	2	2	2	2	2	0	0	0	17.17	15.598
CDC27_HUMAN	P30260	Cell division cycle protein 27 homolog OS=Homo sapiens GN=CDC27 PE=1 SV=2	1.81157	1.45154	0.157676	0.204646			3.11	0.6	0.035833	1	1	1	0	0	0	1	1	1	1	1	1	1	1	1	0	0	0	1	1	1	1	1	1	2	2	2	1	1	1	1	1	1	0	0	0	17.36	16.6423
DSC1_HUMAN	Q08554	Desmocollin-1 OS=Homo sapiens GN=DSC1 PE=1 SV=2	0.20351	1.77786	0.914439	0.376257			3.29	0.65	0.003685	8	4	4	0	0	0	0	0	0	2	2	2	5	2	2	0	0	0	8	4	4	3	2	2	4	2	2	6	5	5	3	2	2	0	0	0	18.85	15.3763
HCFC1_HUMAN	P51610	Host cell factor 1 OS=Homo sapiens GN=HCFC1 PE=1 SV=2	-1.89884	1.71682	0.283271	0.404705			3.31	0.74	0.058726	1	1	1	0	0	0	0	0	0	1	1	1	2	2	2	5	5	5	7	7	6	10	10	9	7	7	6	6	6	6	9	9	9	0	0	0	15.22	16.8184
SRRM2_HUMAN	Q9UQ35	Serine/arginine repetitive matrix protein 2 OS=Homo sapiens GN=SRRM2 PE=1 SV=2	-0.0200001	1.58943	0.989087	0.0243434			3.03	0.63	0.020256	3	3	3	5	5	5	4	4	4	3	3	3	4	4	4	6	6	6	3	3	3	2	2	2	3	3	3	0	0	0	1	1	1	0	0	0	15.5	18.93
ARID2_HUMAN	Q68CP9	AT-rich interactive domain-containing protein 2 OS=Homo sapiens GN=ARID2 PE=1 SV=2	0.946666	-0.268335	0.293146	0.781044			2.47	0.57	0.158848	2	2	2	1	1	1	2	2	2	1	1	1	1	1	1	1	1	1	1	1	1	1	1	1	2	2	2	1	1	1	2	2	2	0	0	0	16.15	16.68
LSM3_HUMAN	P62310	U6 snRNA-associated Sm-like protein LSm3 OS=Homo sapiens GN=LSM3 PE=1 SV=2	0.906666	5.36275	0.620636	0.00201487			2.56	0.68	0.03721	1	1	1	2	2	2	1	1	1	1	1	1	1	1	1	1	1	1	1	1	1	1	1	1	1	1	1	0	0	0	0	0	0	0	0	0	20.4	24.43
SMG9_HUMAN	Q9H0W8	Protein SMG9 OS=Homo sapiens GN=SMG9 PE=1 SV=1	1.59871	-1.10681	0.0126838	0.583998			1.98	0.58	0.183373	1	1	1	0	0	0	0	0	0	0	0	0	0	0	0	0	0	0	2	2	2	0	0	0	0	0	0	1	1	1	1	1	1	0	0	0	16.72	16.254
DNPEP_HUMAN	Q9ULA0	Aspartyl aminopeptidase OS=Homo sapiens GN=DNPEP PE=1 SV=1	0	0.786587	1	0.753126			2.71	0.65	0.014893	0	0	0	0	0	0	0	0	0	0	0	0	0	0	0	0	0	0	5	5	5	5	4	4	2	2	2	5	5	5	6	6	6	0	0	0	16.3118	16.4543
EXOC4_HUMAN	Q96A65	Exocyst complex component 4 OS=Homo sapiens GN=EXOC4 PE=1 SV=1	0	1.20324	1	0.400505			3.07	0.7	0.070642	0	0	0	0	0	0	0	0	0	0	0	0	0	0	0	0	0	0	2	2	2	2	2	2	2	2	2	0	0	0	0	0	0	0	0	0	14.6173	14.8842
DPOD2_HUMAN	P49005	DNA polymerase delta subunit 2 OS=Homo sapiens GN=POLD2 PE=1 SV=1	0	0.52938	1	0.806472			3.26	0.74	0.068689	0	0	0	0	0	0	0	0	0	0	0	0	0	0	0	0	0	0	2	2	2	2	2	2	4	4	4	3	3	3	3	3	3	0	0	0	15.9573	16.6813
ZC21A_HUMAN	Q96GY0	Zinc finger C2HC domain-containing protein 1A OS=Homo sapiens GN=ZC2HC1A PE=1 SV=2	0	1.87647	1	0.400676			2.23	0.66	0.038662	0	0	0	0	0	0	0	0	0	0	0	0	0	0	0	0	0	0	1	1	1	2	2	2	1	1	1	0	0	0	4	4	4	0	0	0	15.6331	15.3611
NTPCR_HUMAN	Q9BSD7	Cancer-related nucleoside-triphosphatase OS=Homo sapiens GN=NTPCR PE=1 SV=1	1.00014	0	0.680932	1			3.09	0.6	0.096658	1	1	1	3	2	2	3	2	2	0	0	0	1	1	1	2	2	2	0	0	0	0	0	0	0	0	0	0	0	0	0	0	0	0	0	0	16.96	22.81
LG3BP_HUMAN	Q08380	Galectin-3-binding protein OS=Homo sapiens GN=LGALS3BP PE=1 SV=1	-0.183334	3.62178	0.898991	0.040913			3.54	0.77	0.03496	5	5	5	4	3	3	8	7	7	11	9	9	4	3	3	9	7	7	2	2	2	4	4	4	3	3	3	0	0	0	2	2	2	0	0	0	20.68	23.71
DMAP1_HUMAN	Q9NPF5	DNA methyltransferase 1-associated protein 1 OS=Homo sapiens GN=DMAP1 PE=1 SV=1	-0.935843	0.629876	0.29041	0.765606			2.68	0.66	0.06587	1	1	1	0	0	0	0	0	0	1	1	1	0	0	0	1	1	1	3	3	3	2	2	2	4	2	2	3	3	3	4	4	4	0	0	0	16.54	15.6205
SKT_HUMAN	Q5T5P2	Sickle tail protein homolog OS=Homo sapiens GN=KIAA1217 PE=1 SV=2	3.91369	0.393268	0.0266512	0.722884			4.23	0.78	0.01377	30	27	27	5	5	5	18	17	17	7	7	7	2	2	2	0	0	0	1	1	1	0	0	0	6	6	6	3	3	3	3	3	3	0	0	0	20.12	18.47
PCY1B_HUMAN	Q9Y5K3	Choline-phosphate cytidylyltransferase B OS=Homo sapiens GN=PCYT1B PE=1 SV=1	-1.24724	0.632424	0.443914	0.714534			3.59	0.7	0.14094	1	1	0	0	0	0	0	0	0	0	0	0	1	1	0	1	1	0	1	1	0	1	1	0	2	2	0	1	1	0	2	2	0	0	0	0	16.82	15.7513
KIF2A_HUMAN	O00139	Kinesin-like protein KIF2A OS=Homo sapiens GN=KIF2A PE=1 SV=3	0.181114	1.71244	0.839444	0.38884			4.19	0.72	0.039368	1	1	1	1	1	1	1	1	1	1	1	1	0	0	0	1	1	1	4	4	3	2	2	2	6	6	5	1	1	0	3	3	2	0	0	0	16.39	18.46
ERI1_HUMAN	Q8IV48	3'-5' exoribonuclease 1 OS=Homo sapiens GN=ERI1 PE=1 SV=3	0	0.376153	1	0.865085			3.05	0.73	0.061244	0	0	0	0	0	0	0	0	0	0	0	0	0	0	0	0	0	0	1	1	1	1	1	1	2	2	2	2	2	2	2	2	2	0	0	0	13.8513	17.1784
SH3G1_HUMAN	Q99961	Endophilin-A2 OS=Homo sapiens GN=SH3GL1 PE=1 SV=1	0	0.336365	1	0.890151			2.32	0.59	0.140217	0	0	0	0	0	0	0	0	0	0	0	0	0	0	0	0	0	0	3	3	0	1	1	0	2	2	0	4	4	2	7	5	2	0	0	0	16.4497	15.4374
CCNG1_HUMAN	P51959	Cyclin-G1 OS=Homo sapiens GN=CCNG1 PE=1 SV=2	0	3.57908	1	0.138929	P51959		2.68	0.61	0.084606	0	0	0	0	0	0	0	0	0	0	0	0	0	0	0	0	0	0	5	4	4	4	3	3	6	5	5	3	3	3	3	3	3	0	0	0	16.437	15.5066
LS14B_HUMAN	Q9BX40	Protein LSM14 homolog B OS=Homo sapiens GN=LSM14B PE=1 SV=1	-1.08161	1.32361	0.49707	0.527744			2.54	0.67	0.014992	1	1	1	0	0	0	1	1	1	2	2	2	0	0	0	1	1	1	2	2	2	2	2	2	2	2	2	1	1	1	2	2	2	0	0	0	17.92	15.419
NEST_HUMAN	P48681	Nestin OS=Homo sapiens GN=NES PE=1 SV=2	0.096667	-0.585514	0.951861	0.0751104			4.94	0.74	0.005927	24	22	22	31	24	24	35	29	29	33	28	28	27	24	24	36	30	30	0	0	0	0	0	0	0	0	0	1	1	1	1	1	1	0	0	0	20.21	23.76
GNL3L_HUMAN	Q9NVN8	Guanine nucleotide-binding protein-like 3-like protein OS=Homo sapiens GN=GNL3L PE=1 SV=1	-0.591657	3.09754	0.725301	0.0872761			3.48	0.64	0.084758	2	2	2	0	0	0	2	2	2	1	1	1	1	1	1	1	1	1	3	3	3	4	4	4	8	8	8	2	2	2	2	2	2	0	0	0	18.63	16.465
GSK3B_HUMAN	P49841	Glycogen synthase kinase-3 beta OS=Homo sapiens GN=GSK3B PE=1 SV=2	-0.0226405	2.15898	0.988605	0.32853			3.45	0.7	0.097926	1	1	1	0	0	0	1	1	1	0	0	0	1	1	1	0	0	0	4	4	4	3	3	3	2	2	2	2	2	2	2	2	2	0	0	0	18.17	14.0751
OAT_HUMAN	P04181	Ornithine aminotransferase, mitochondrial OS=Homo sapiens GN=OAT PE=1 SV=1	1.37363	1.6672	0.781714	0.0255688			5.07	0.74	0.041866	0	0	0	18	15	15	0	0	0	0	0	0	0	0	0	5	5	5	0	0	0	1	1	1	1	1	1	0	0	0	0	0	0	0	0	0	15.7618	26.93
UBP10_HUMAN	Q14694	Ubiquitin carboxyl-terminal hydrolase 10 OS=Homo sapiens GN=USP10 PE=1 SV=2	0.553333	2.88738	0.776742	0.0489605			4.76	0.66	0.006538	1	1	1	3	3	3	5	5	5	3	3	3	2	2	2	3	3	3	1	1	1	2	2	2	5	5	5	0	0	0	1	1	1	0	0	0	17.09	21.75
PURA2_HUMAN	P30520	Adenylosuccinate synthetase isozyme 2 OS=Homo sapiens GN=ADSS PE=1 SV=3	-1.06646	0.540077	0.351719	0.815968			2.74	0.63	0.004898	0	0	0	0	0	0	1	1	1	0	0	0	0	0	0	1	1	1	1	1	1	3	3	3	5	5	5	4	4	4	5	5	5	0	0	0	15.2521	16.8261
BAG3_HUMAN	O95817	BAG family molecular chaperone regulator 3 OS=Homo sapiens GN=BAG3 PE=1 SV=3	0.71	1.51755	0.56803	0.145501			4.99	0.67	0.116509	5	5	5	5	5	5	5	5	5	5	5	5	3	3	3	5	5	5	2	2	2	1	1	1	1	1	1	1	1	1	1	1	1	0	0	0	19.61	21.48
FA83D_HUMAN	Q9H4H8	Protein FAM83D OS=Homo sapiens GN=FAM83D PE=1 SV=3	-0.18	2.37228	0.813823	0.351483			3.83	0.67	0.013108	5	5	5	2	2	2	4	4	4	4	4	4	5	5	5	4	4	4	8	8	8	6	6	6	10	8	8	4	4	4	8	8	8	0	0	0	20.49	21.67
CGL_HUMAN	P32929	Cystathionine gamma-lyase OS=Homo sapiens GN=CTH PE=1 SV=3	0	1.39752	1	0.524507			2.81	0.64	0.019478	0	0	0	0	0	0	0	0	0	0	0	0	0	0	0	0	0	0	2	2	2	5	5	5	5	5	5	2	2	2	3	3	3	0	0	0	16.2835	15.0531
OGT1_HUMAN	O15294	UDP-N-acetylglucosamine--peptide N-acetylglucosaminyltransferase 110 kDa subunit OS=Homo sapiens GN=OGT PE=1 SV=3	0.11	2.30245	0.855465	0.300658			3.77	0.6	0.002155	3	3	3	1	1	1	3	3	3	3	3	3	3	3	3	2	2	2	9	9	9	6	6	6	9	9	9	7	7	7	6	6	6	0	0	0	18.63	19.02
SBP1_HUMAN	Q13228	Selenium-binding protein 1 OS=Homo sapiens GN=SELENBP1 PE=1 SV=2	0.332811	0.519044	0.783526	0.779992			3.02	0.61	0.241754	1	1	1	0	0	0	0	0	0	0	0	0	1	1	1	0	0	0	2	2	2	4	4	4	3	3	3	2	2	2	3	3	3	0	0	0	17.39	16.7626
DC1L2_HUMAN	O43237	Cytoplasmic dynein 1 light intermediate chain 2 OS=Homo sapiens GN=DYNC1LI2 PE=1 SV=1	0.80403	0.269102	0.488689	0.874626			3.26	0.58	0.043201	0	0	0	0	0	0	1	1	1	0	0	0	0	0	0	0	0	0	1	1	1	2	2	2	1	1	1	1	1	1	1	1	1	0	0	0	16.1101	15.8888
1B52_HUMAN	P30490	HLA class I histocompatibility antigen, B-52 alpha chain OS=Homo sapiens GN=HLA-B PE=2 SV=1	0.90117	2.41415	0.793281	0.0468181			4.99	0.71	0.193652	0	0	0	4	4	0	3	3	0	0	0	0	0	0	0	3	3	0	0	0	0	1	1	0	1	1	0	0	0	0	0	0	0	0	0	0	15.3082	23.76
SPB12_HUMAN	Q96P63	Serpin B12 OS=Homo sapiens GN=SERPINB12 PE=1 SV=1	1.19471	1.60706	0.251471	0.480795			2.05	0.56	0.020995	4	3	3	0	0	0	0	0	0	1	1	1	1	1	1	0	0	0	4	2	2	2	1	1	5	2	2	4	3	3	3	1	1	0	0	0	18.86	16.1785
PINX1_HUMAN	Q96BK5	PIN2/TERF1-interacting telomerase inhibitor 1 OS=Homo sapiens GN=PINX1 PE=1 SV=2	3.24121	1.31846	0.0110138	0.292951			2.4	0.61	0.215917	2	2	2	1	1	1	2	2	2	0	0	0	0	0	0	0	0	0	1	1	1	1	1	1	1	1	1	0	0	0	1	1	1	0	0	0	19.6	18.39
SMRD1_HUMAN	Q96GM5	SWI/SNF-related matrix-associated actin-dependent regulator of chromatin subfamily D member 1 OS=Homo sapiens GN=SMARCD1 PE=1 SV=2	0.613623	1.15539	0.489484	0.591675			4.68	0.73	0.050154	1	1	1	0	0	0	0	0	0	0	0	0	0	0	0	0	0	0	3	2	2	3	3	2	4	4	3	1	1	1	7	7	6	0	0	0	16.89	14.6518
GTSE1_HUMAN	Q9NYZ3	G2 and S phase-expressed protein 1 OS=Homo sapiens GN=GTSE1 PE=1 SV=3	0	0.663324	1	0.683695			4.47	0.7	0.009634	0	0	0	0	0	0	0	0	0	0	0	0	0	0	0	0	0	0	4	4	4	1	1	1	2	2	2	1	1	1	4	4	4	0	0	0	16.6269	16.0886
RTCA_HUMAN	O00442	RNA 3'-terminal phosphate cyclase OS=Homo sapiens GN=RTCA PE=1 SV=1	0.797134	0.467719	0.35542	0.747273			2.03	0.66	0.811181	0	0	0	0	0	0	1	1	1	0	0	0	0	0	0	0	0	0	1	1	1	1	1	1	1	1	1	2	2	2	1	1	1	0	0	0	16.3227	14.7113
THOP1_HUMAN	P52888	Thimet oligopeptidase OS=Homo sapiens GN=THOP1 PE=1 SV=2	2.04313	2.75381	0.0602063	0.238674			4.1	0.74	0.037385	3	3	3	1	1	1	1	1	1	1	1	1	0	0	0	0	0	0	5	5	5	9	8	8	6	6	6	6	6	6	6	6	6	0	0	0	18.08	16.73
LYSC_HUMAN	P61626	Lysozyme C OS=Homo sapiens GN=LYZ PE=1 SV=1	-0.0176388	0.767842	0.983217	0.737471			2.92	0.68	0.007582	0	0	0	0	0	0	0	0	0	0	0	0	1	1	1	0	0	0	4	2	2	1	1	1	1	1	1	2	2	2	2	1	1	0	0	0	16.0543	17.9251
SAE1_HUMAN	Q9UBE0	SUMO-activating enzyme subunit 1 OS=Homo sapiens GN=SAE1 PE=1 SV=1	0.100208	0.603923	0.880631	0.809241			3.78	0.71	0.30381	0	0	0	0	0	0	1	1	1	0	0	0	0	0	0	0	0	0	2	2	2	3	3	3	1	1	1	3	3	3	2	2	2	0	0	0	15.5927	15.7388
ANR17_HUMAN	O75179	Ankyrin repeat domain-containing protein 17 OS=Homo sapiens GN=ANKRD17 PE=1 SV=3	0.523334	1.19116	0.695775	0.0451185			2.53	0.64	0.123225	2	2	0	2	2	0	3	3	1	1	1	0	2	2	0	3	3	0	1	1	0	1	1	0	1	1	0	0	0	0	0	0	0	0	0	0	15.6	18
ABC3C_HUMAN	Q9NRW3	Probable DNA dC->dU-editing enzyme APOBEC-3C OS=Homo sapiens GN=APOBEC3C PE=1 SV=2	0.413333	2.07342	0.824169	0.343385			3.22	0.62	0.011379	1	1	0	1	1	1	1	1	0	1	1	0	1	1	0	2	2	1	1	1	1	1	1	0	2	2	1	1	1	0	1	1	0	0	0	0	18.06	20.26
HMMR_HUMAN	O75330	Hyaluronan mediated motility receptor OS=Homo sapiens GN=HMMR PE=1 SV=2	0.283333	2.56383	0.761858	0.270398			5.96	0.77	0.012131	9	9	9	3	3	3	8	8	8	6	6	6	4	4	4	8	8	8	9	9	9	7	7	7	17	17	17	5	5	5	10	10	10	0	0	0	19.73	20.25
CTBP1_HUMAN	Q13363	C-terminal-binding protein 1 OS=Homo sapiens GN=CTBP1 PE=1 SV=2	0	0.6568	1	0.738507			2	0.49	0.000396	0	0	0	0	0	0	0	0	0	0	0	0	0	0	0	0	0	0	2	2	1	2	2	1	3	3	2	1	1	0	2	2	1	0	0	0	16.6011	15.2488
BAF_HUMAN	O75531	Barrier-to-autointegration factor OS=Homo sapiens GN=BANF1 PE=1 SV=1	1.54667	-0.825769	0.648999	0.727737			5.61	0.76	0.055615	1	1	1	4	4	4	3	3	3	1	1	1	1	1	1	7	5	5	0	0	0	0	0	0	0	0	0	1	1	1	0	0	0	0	0	0	19.81	26.32
TLN2_HUMAN	Q9Y4G6	Talin-2 OS=Homo sapiens GN=TLN2 PE=1 SV=4	0.284841	1.729	0.85965	0.00650945			2.66	0.54	0.044959	2	2	0	3	3	0	2	2	0	1	1	0	0	0	0	1	1	0	0	0	0	1	1	0	0	0	0	0	0	0	1	1	0	0	0	0	14.69	18.92
RAB9A_HUMAN	P51151	Ras-related protein Rab-9A OS=Homo sapiens GN=RAB9A PE=1 SV=1	0.894498	0	0.704446	1			3.32	0.64	0.061631	0	0	0	3	2	2	2	2	1	1	1	0	1	1	0	3	2	2	0	0	0	0	0	0	0	0	0	0	0	0	0	0	0	0	0	0	17.2135	22.75
KINH_HUMAN	P33176	Kinesin-1 heavy chain OS=Homo sapiens GN=KIF5B PE=1 SV=1	2.06667	3.17681	0.205537	0.134799			3.9	0.71	0.004088	14	13	9	3	3	2	8	7	5	2	2	1	3	3	2	7	7	5	12	11	10	12	11	8	12	11	9	6	5	4	4	4	3	0	0	0	20.69	20.47
MLKL_HUMAN	Q8NB16	Mixed lineage kinase domain-like protein OS=Homo sapiens GN=MLKL PE=1 SV=1	-0.195018	1.82702	0.886765	0.426319			2.02	0.45	0.095527	1	1	1	1	1	1	0	0	0	0	0	0	1	1	1	0	0	0	4	4	4	4	4	4	6	6	6	3	3	3	5	5	5	0	0	0	16.52	18.85
CS043_HUMAN	Q9BQ61	Uncharacterized protein C19orf43 OS=Homo sapiens GN=C19orf43 PE=1 SV=1	0.366666	0	0.815014	1			3.43	0.67	0.108785	1	1	1	1	1	1	2	2	2	1	1	1	1	1	1	1	1	1	0	0	0	0	0	0	0	0	0	0	0	0	0	0	0	0	0	0	18.46	21.83
ICAM1_HUMAN	P05362	Intercellular adhesion molecule 1 OS=Homo sapiens GN=ICAM1 PE=1 SV=2	2.36599	2.83958	0.364736	0.0159059			4.1	0.7	0.089408	0	0	0	2	2	2	1	1	1	0	0	0	0	0	0	3	3	3	1	1	1	1	1	1	1	1	1	0	0	0	0	0	0	0	0	0	17.1614	20.19
ZC11A_HUMAN	O75152	Zinc finger CCCH domain-containing protein 11A OS=Homo sapiens GN=ZC3H11A PE=1 SV=3	-0.723333	1.72591	0.741492	0.322701			4.19	0.75	0.020174	5	5	5	3	3	3	2	2	2	2	2	2	4	3	3	6	6	6	7	7	7	6	6	5	5	5	5	4	4	3	5	5	4	0	0	0	18.05	19.36
RPC1_HUMAN	O14802	DNA-directed RNA polymerase III subunit RPC1 OS=Homo sapiens GN=POLR3A PE=1 SV=2	1.2256	-0.213051	0.083871	0.887756			1.97	0.55	0.042244	0	0	0	0	0	0	0	0	0	1	1	1	1	1	1	0	0	0	3	3	3	1	1	1	1	1	1	3	3	2	3	3	3	0	0	0	15.6002	16.0285
HSPB8_HUMAN	Q9UJY1	Heat shock protein beta-8 OS=Homo sapiens GN=HSPB8 PE=1 SV=1	1.18922	0	0.590794	1			2.23	0.55	0.460082	1	1	1	1	1	1	2	2	2	0	0	0	1	1	1	1	1	1	0	0	0	0	0	0	0	0	0	0	0	0	0	0	0	0	0	0	18.56	20.84
CPPED_HUMAN	Q9BRF8	Calcineurin-like phosphoesterase domain-containing protein 1 OS=Homo sapiens GN=CPPED1 PE=1 SV=3	-0.806268	1.29265	0.311423	0.605913			2.84	0.59	0.011208	1	1	1	0	0	0	0	0	0	1	1	1	2	2	2	0	0	0	2	2	2	2	2	2	2	2	2	2	2	2	2	2	2	0	0	0	17.11	16.3062
UBP7_HUMAN	Q93009	Ubiquitin carboxyl-terminal hydrolase 7 OS=Homo sapiens GN=USP7 PE=1 SV=2	0.726667	1.8057	0.618215	0.396394			3.98	0.57	0.030103	4	4	4	1	1	1	4	4	4	5	5	5	2	2	2	6	5	5	8	8	8	7	7	7	6	6	6	5	5	5	6	6	6	0	0	0	18.5	18.9
TSR1_HUMAN	Q2NL82	Pre-rRNA-processing protein TSR1 homolog OS=Homo sapiens GN=TSR1 PE=1 SV=1	-0.27	2.64682	0.786208	0.181924			4.1	0.68	0.004844	2	2	2	1	1	1	3	3	3	4	4	4	4	4	4	2	2	2	4	4	4	4	4	4	6	6	6	5	5	5	3	3	3	0	0	0	17.25	19.34
DNJB8_HUMAN	Q8NHS0	DnaJ homolog subfamily B member 8 OS=Homo sapiens GN=DNAJB8 PE=1 SV=1	0.513615	0	0.784905	1			2.14	0.56	0.270067	0	0	0	1	1	0	1	1	0	1	1	0	1	1	0	2	1	0	0	0	0	0	0	0	0	0	0	0	0	0	0	0	0	0	0	0	17.2808	21.33
TSYL1_HUMAN	Q9H0U9	Testis-specific Y-encoded-like protein 1 OS=Homo sapiens GN=TSPYL1 PE=1 SV=3	0.51865	0.653548	0.196535	0.708342			3.7	0.66	0.019525	1	1	1	0	0	0	0	0	0	0	0	0	1	1	1	0	0	0	1	1	1	2	2	2	2	2	2	1	1	1	3	3	3	0	0	0	16.16	16.1748
RHOG_HUMAN	P84095	Rho-related GTP-binding protein RhoG OS=Homo sapiens GN=RHOG PE=1 SV=1	1.06333	0	0.758334	1			4.8	0.81	0.012651	1	1	1	10	6	6	6	5	5	1	1	1	1	1	1	8	5	5	0	0	0	0	0	0	0	0	0	0	0	0	0	0	0	0	0	0	18.22	26.58
IL18_HUMAN	Q14116	Interleukin-18 OS=Homo sapiens GN=IL18 PE=1 SV=1	-2.62711	0.781589	0.130349	0.782977			2.38	0.6	0.000266	1	1	1	0	0	0	1	1	1	1	1	1	1	1	1	2	2	2	2	2	2	3	3	3	1	1	1	3	3	3	4	4	4	0	0	0	17.46	15.2687
SPT6H_HUMAN	Q7KZ85	Transcription elongation factor SPT6 OS=Homo sapiens GN=SUPT6H PE=1 SV=2	0.63466	2.48145	0.775316	0.0472615			3.32	0.68	0.037623	0	0	0	6	6	6	2	2	2	1	1	1	1	1	1	5	5	5	0	0	0	0	0	0	1	1	1	0	0	0	1	1	1	0	0	0	15.564	19.65
PDC6I_HUMAN	Q8WUM4	Programmed cell death 6-interacting protein OS=Homo sapiens GN=PDCD6IP PE=1 SV=1	1.08743	1.49491	0.539689	0.521068			2.94	0.7	0.019205	3	3	3	0	0	0	0	0	0	2	2	2	0	0	0	0	0	0	4	4	4	8	8	8	5	5	5	7	7	7	6	6	6	0	0	0	18.05	14.4047
RRP15_HUMAN	Q9Y3B9	RRP15-like protein OS=Homo sapiens GN=RRP15 PE=1 SV=2	1.17298	2.12867	0.386149	0.36089			2.98	0.57	0.062876	1	1	1	1	1	1	2	2	2	1	1	1	0	0	0	2	2	2	4	4	4	3	3	3	4	3	3	5	4	4	3	2	2	0	0	0	17.44	18.49
SMRC2_HUMAN	Q8TAQ2	SWI/SNF complex subunit SMARCC2 OS=Homo sapiens GN=SMARCC2 PE=1 SV=1	-2.49333	2.05943	0.0985083	0.413582			4.05	0.73	0.009909	8	8	5	1	1	1	2	2	2	7	7	4	7	7	3	8	7	4	10	9	5	8	7	4	9	8	5	8	8	6	9	8	5	0	0	0	19.08	16.04
1B42_HUMAN	P30480	HLA class I histocompatibility antigen, B-42 alpha chain OS=Homo sapiens GN=HLA-B PE=1 SV=1	0.717237	3.03573	0.84569	0.00676738			3.57	0.69	0.031364	0	0	0	3	3	0	1	1	0	0	0	0	0	0	0	2	2	0	0	0	0	1	1	0	1	1	0	0	0	0	0	0	0	0	0	0	14.9233	23.47
STAG2_HUMAN	Q8N3U4	Cohesin subunit SA-2 OS=Homo sapiens GN=STAG2 PE=1 SV=3	-2.10667	2.19404	0.17047	0.336768			3.47	0.69	0.023793	4	4	1	1	1	1	3	3	1	9	9	6	6	6	2	10	10	7	7	7	6	7	7	6	10	10	7	7	7	5	8	8	5	0	0	0	17.11	18.13
TNPO2_HUMAN	O14787	Transportin-2 OS=Homo sapiens GN=TNPO2 PE=1 SV=3	-0.692916	2.2095	0.565352	0.345915			3.81	0.71	0.015685	3	3	0	0	0	0	3	2	0	1	1	0	4	2	0	2	2	0	4	3	1	6	5	1	6	4	0	5	3	0	5	4	0	0	0	0	17.89	16.5512
DEK_HUMAN	P35659	Protein DEK OS=Homo sapiens GN=DEK PE=1 SV=1	0	-0.0146866	1	0.994565			1.75	0.46	0.007693	0	0	0	0	0	0	0	0	0	0	0	0	0	0	0	0	0	0	0	0	0	1	1	1	2	2	2	3	3	3	1	1	1	0	0	0	16.2716	14.881
PR40A_HUMAN	O75400	Pre-mRNA-processing factor 40 homolog A OS=Homo sapiens GN=PRPF40A PE=1 SV=2	0.796667	2.5294	0.316384	0.137517			4.19	0.64	0.043765	3	3	3	1	1	1	3	3	3	2	1	1	3	2	2	2	2	2	4	4	4	3	3	3	4	4	4	1	1	1	2	2	2	0	0	0	18.77	19.3
NUSAP_HUMAN	Q9BXS6	Nucleolar and spindle-associated protein 1 OS=Homo sapiens GN=NUSAP1 PE=1 SV=1	-1.819	2.16106	0.155902	0.403325			3.04	0.72	0.000985	2	2	2	0	0	0	0	0	0	1	1	1	2	2	2	1	1	1	8	8	8	7	7	7	10	10	10	5	5	5	8	8	8	0	0	0	18.08	15.2282
MTR1_HUMAN	Q8N1G2	Cap-specific mRNA (nucleoside-2'-O-)-methyltransferase 1 OS=Homo sapiens GN=FTSJD2 PE=1 SV=1	-1.17124	2.22083	0.327004	0.0319729			1.56	0.4	0.083775	0	0	0	0	0	0	0	0	0	1	1	1	0	0	0	1	1	1	0	0	0	2	2	2	1	1	1	0	0	0	0	0	0	0	0	0	13.7693	16.358
ZN414_HUMAN	Q96IQ9	Zinc finger protein 414 OS=Homo sapiens GN=ZNF414 PE=2 SV=2	0	2.58194	1	0.318799			4.17	0.67	0.003298	0	0	0	0	0	0	0	0	0	0	0	0	0	0	0	0	0	0	2	2	2	2	2	2	4	2	2	1	1	1	2	2	2	0	0	0	16.1657	14.6363
ODPB_HUMAN	P11177	Pyruvate dehydrogenase E1 component subunit beta, mitochondrial OS=Homo sapiens GN=PDHB PE=1 SV=3	1.14072	1.65452	0.808597	0.0459155			4.85	0.8	0.011501	0	0	0	25	16	16	11	10	10	2	2	2	4	4	4	18	12	12	0	0	0	1	1	1	1	1	1	0	0	0	0	0	0	0	0	0	15.5922	28.14
ELP1_HUMAN	O95163	Elongator complex protein 1 OS=Homo sapiens GN=IKBKAP PE=1 SV=3	-1.47636	0.628451	0.161912	0.661177			2.62	0.68	0.053309	1	1	1	0	0	0	0	0	0	1	1	1	0	0	0	3	3	3	1	1	1	2	2	2	1	1	1	1	1	1	2	2	2	0	0	0	15.61	15.2588
GSHB_HUMAN	P48637	Glutathione synthetase OS=Homo sapiens GN=GSS PE=1 SV=1	0	0.550212	1	0.822597			2.05	0.54	0.204987	0	0	0	0	0	0	0	0	0	0	0	0	0	0	0	0	0	0	1	1	1	3	3	3	1	1	1	4	4	4	1	1	1	0	0	0	14.8493	15.2538
SHCBP_HUMAN	Q8NEM2	SHC SH2 domain-binding protein 1 OS=Homo sapiens GN=SHCBP1 PE=1 SV=3	-0.140524	1.93951	0.81037	0.273744			1.86	0.47	0.095474	1	1	1	0	0	0	0	0	0	0	0	0	0	0	0	0	0	0	1	1	1	2	2	2	3	3	3	1	1	1	2	2	2	0	0	0	15.45	15.513
ARI1A_HUMAN	O14497	AT-rich interactive domain-containing protein 1A OS=Homo sapiens GN=ARID1A PE=1 SV=3	0.723175	1.56836	0.276885	0.186208			2.58	0.65	0.048172	1	1	1	1	1	1	2	2	2	1	1	1	2	2	2	0	0	0	2	2	2	3	3	3	2	2	2	1	1	1	1	1	1	0	0	0	14.79	16.18
NSUN5_HUMAN	Q96P11	Putative methyltransferase NSUN5 OS=Homo sapiens GN=NSUN5 PE=1 SV=2	-1.44497	1.32356	0.182456	0.541179			2.56	0.64	0.037219	0	0	0	0	0	0	0	0	0	0	0	0	0	0	0	1	1	1	2	2	1	3	3	2	3	3	2	1	1	0	5	5	4	0	0	0	16.4704	15.8425
2A5E_HUMAN	Q16537	Serine/threonine-protein phosphatase 2A 56 kDa regulatory subunit epsilon isoform OS=Homo sapiens GN=PPP2R5E PE=1 SV=1	0.113333	1.86266	0.29848	0.356871			2.75	0.61	0.002456	16	4	1	5	3	0	12	3	0	14	3	0	15	3	0	7	3	0	2	2	0	2	2	1	3	3	2	1	1	0	1	1	0	0	0	0	27.6	27.5
FRG1B_HUMAN	Q9BZ01	Protein FRG1B OS=Homo sapiens GN=FRG1B PE=2 SV=1	-0.276666	1.62068	0.851832	0.452679			2.53	0.54	0.043801	1	1	0	1	1	0	2	2	0	1	1	0	1	1	0	2	2	0	2	2	0	3	2	0	3	2	0	1	1	0	3	2	0	0	0	0	15.87	18.16
ZN593_HUMAN	O00488	Zinc finger protein 593 OS=Homo sapiens GN=ZNF593 PE=1 SV=2	-0.486666	1.28415	0.575401	0.643177			3.01	0.69	0.011837	2	2	2	1	1	1	2	2	2	3	3	3	2	2	2	2	2	2	4	4	4	2	2	2	2	2	2	4	4	4	3	3	3	0	0	0	19.02	20.18
RPC4_HUMAN	P05423	DNA-directed RNA polymerase III subunit RPC4 OS=Homo sapiens GN=POLR3D PE=1 SV=2	0	1.46545	1	0.455877			1.74	0.54	0.063101	0	0	0	0	0	0	0	0	0	0	0	0	0	0	0	0	0	0	1	1	1	1	1	1	1	1	1	0	0	0	2	2	2	0	0	0	15.8001	15.5616
COCA1_HUMAN	Q99715	Collagen alpha-1(XII) chain OS=Homo sapiens GN=COL12A1 PE=1 SV=2	0.736666	0	0.737241	1			3.56	0.74	0.005872	13	13	13	34	34	34	33	33	33	14	14	14	6	6	6	34	34	34	0	0	0	0	0	0	0	0	0	0	0	0	0	0	0	0	0	0	17.71	22.35
LAS1L_HUMAN	Q9Y4W2	Ribosomal biogenesis protein LAS1L OS=Homo sapiens GN=LAS1L PE=1 SV=2	-1.34479	2.05617	0.350811	0.264199			3.41	0.62	0.426969	1	1	1	0	0	0	0	0	0	1	1	1	0	0	0	1	1	1	3	3	3	2	2	2	3	3	3	1	1	1	1	1	1	0	0	0	17.2	16.6495
AMPD2_HUMAN	Q01433	AMP deaminase 2 OS=Homo sapiens GN=AMPD2 PE=1 SV=2	0.690125	1.28559	0.40145	0.573866	Q01433		2.52	0.6	0.015681	2	2	2	0	0	0	0	0	0	0	0	0	0	0	0	0	0	0	4	4	4	5	5	4	3	3	2	6	6	6	3	3	3	0	0	0	17.55	15.5147
CPT1A_HUMAN	P50416	Carnitine O-palmitoyltransferase 1, liver isoform OS=Homo sapiens GN=CPT1A PE=1 SV=2	1.39102	5.12945	0.748658	0.00420972			4.13	0.75	0.000304	0	0	0	27	21	21	2	2	2	0	0	0	1	1	1	11	9	9	3	3	3	8	8	8	7	7	7	0	0	0	1	1	1	0	0	0	15.7616	26.34
PLPL6_HUMAN	Q8IY17	Neuropathy target esterase OS=Homo sapiens GN=PNPLA6 PE=1 SV=2	0.0782286	1.73759	0.971678	0.000979009			3.63	0.69	0.178007	0	0	0	1	1	1	0	0	0	1	1	1	0	0	0	5	5	5	0	0	0	0	0	0	1	1	1	0	0	0	0	0	0	0	0	0	16.0861	19.21
ADA_HUMAN	P00813	Adenosine deaminase OS=Homo sapiens GN=ADA PE=1 SV=3	-0.301845	3.74279	0.716082	0.121623			3.67	0.67	0.05035	2	2	2	0	0	0	0	0	0	1	1	1	2	2	2	0	0	0	3	3	3	5	5	5	5	5	5	1	1	1	3	3	3	0	0	0	17.95	16.2495
SDS3_HUMAN	Q9H7L9	Sin3 histone deacetylase corepressor complex component SDS3 OS=Homo sapiens GN=SUDS3 PE=1 SV=2	0	3.41623	1	0.0559707			2.11	0.49	0.203296	0	0	0	0	0	0	0	0	0	0	0	0	0	0	0	0	0	0	1	1	1	2	2	2	2	2	2	0	0	0	1	1	1	0	0	0	15.501	13.9327
NADAP_HUMAN	Q9BWU0	Kanadaptin OS=Homo sapiens GN=SLC4A1AP PE=1 SV=1	0.0454775	2.17771	0.975548	0.0414137			2.2	0.53	0.042047	1	1	1	1	1	1	0	0	0	0	0	0	0	0	0	2	2	2	2	2	2	2	2	2	1	1	1	0	0	0	1	1	1	0	0	0	15.95	18.45
SNX1_HUMAN	Q13596	Sorting nexin-1 OS=Homo sapiens GN=SNX1 PE=1 SV=3	-0.580423	2.07196	0.673616	0.33902			2.96	0.63	0.146212	2	2	1	0	0	0	1	1	1	1	1	1	2	2	1	1	1	1	2	2	2	5	5	5	2	2	2	3	3	3	3	3	3	0	0	0	18.7	16.7787
CS021_HUMAN	Q8IVT2	Uncharacterized protein C19orf21 OS=Homo sapiens GN=C19orf21 PE=1 SV=1	-0.436666	-0.325462	0.805481	0.734123			2.96	0.6	0.009626	4	4	4	4	4	4	2	2	2	4	4	4	1	1	1	7	6	6	0	0	0	0	0	0	0	0	0	1	1	1	2	2	2	0	0	0	20.56	22.16
CTBP2_HUMAN	P56545	C-terminal-binding protein 2 OS=Homo sapiens GN=CTBP2 PE=1 SV=1	-0.0625938	0.990155	0.945469	0.658147			2	0.48	0.000396	0	0	0	0	0	0	0	0	0	1	1	1	0	0	0	0	0	0	2	2	1	2	2	1	2	2	1	1	1	0	3	3	2	0	0	0	16.6303	15.621
CELF2_HUMAN	O95319	CUGBP Elav-like family member 2 OS=Homo sapiens GN=CELF2 PE=1 SV=1	0	0.844527	1	0.672001			2.33	0.49	0.107046	0	0	0	0	0	0	0	0	0	0	0	0	0	0	0	0	0	0	0	0	0	2	2	0	1	1	0	1	1	0	1	1	0	0	0	0	15.3831	15.4716
AKA12_HUMAN	Q02952	A-kinase anchor protein 12 OS=Homo sapiens GN=AKAP12 PE=1 SV=4	0.19	2.79822	0.926185	0.00864275			5.49	0.79	0.063028	2	2	2	12	11	11	8	7	7	5	5	5	6	5	5	6	6	6	5	5	5	3	3	3	6	6	6	0	0	0	1	1	1	0	0	0	15.03	20.85
NELFE_HUMAN	P18615	Negative elongation factor E OS=Homo sapiens GN=RDBP PE=1 SV=3	0	0.685021	1	0.771539			3.77	0.74	0.034641	0	0	0	0	0	0	0	0	0	0	0	0	0	0	0	0	0	0	1	1	1	3	3	3	2	2	2	1	1	1	5	4	4	0	0	0	16.5882	16.4414
PUR4_HUMAN	O15067	Phosphoribosylformylglycinamidine synthase OS=Homo sapiens GN=PFAS PE=1 SV=4	-3.09811	2.33616	0.0987406	0.326649			5.81	0.76	0.00892	7	7	7	0	0	0	1	1	1	6	6	6	5	4	4	4	4	4	6	6	6	11	10	10	8	8	8	8	8	8	5	5	5	0	0	0	18.22	14.3157
AQR_HUMAN	O60306	Intron-binding protein aquarius OS=Homo sapiens GN=AQR PE=1 SV=4	-0.74	2.45732	0.554443	0.332691			4.41	0.73	0.011593	10	10	10	3	3	3	4	4	3	8	8	8	6	6	6	12	12	11	13	13	13	9	9	8	11	11	11	5	5	5	16	16	15	0	0	0	18.55	18.96
PB1_HUMAN	Q86U86	Protein polybromo-1 OS=Homo sapiens GN=PBRM1 PE=1 SV=1	1.12333	1.58933	0.226559	0.42599			3.76	0.75	0.003286	8	8	8	2	2	2	4	4	4	4	4	4	1	1	1	2	2	2	5	5	5	4	4	4	8	8	8	8	8	8	7	7	7	0	0	0	17.32	17.24
RRP44_HUMAN	Q9Y2L1	Exosome complex exonuclease RRP44 OS=Homo sapiens GN=DIS3 PE=1 SV=2	1.09333	-0.139174	0.223947	0.906112			3.24	0.7	0.018975	10	10	10	2	2	2	2	2	2	4	4	4	5	5	5	3	3	3	0	0	0	0	0	0	1	1	1	1	1	1	1	1	1	0	0	0	20.62	18.43
SPB3_HUMAN	P29508	Serpin B3 OS=Homo sapiens GN=SERPINB3 PE=1 SV=2	0	2.43488	1	0.406146			2.35	0.6	0.033221	0	0	0	0	0	0	0	0	0	0	0	0	0	0	0	0	0	0	9	5	1	4	2	0	1	1	0	3	2	0	2	2	0	0	0	0	16.6973	14.8311
PSD10_HUMAN	O75832	26S proteasome non-ATPase regulatory subunit 10 OS=Homo sapiens GN=PSMD10 PE=1 SV=1	2.39591	-3.49013	0.353982	0.152896			3.1	0.56	0.094559	1	1	1	1	1	1	1	1	1	0	0	0	0	0	0	1	1	1	0	0	0	0	0	0	0	0	0	2	2	2	1	1	1	0	0	0	17.88	21.46
STAG1_HUMAN	Q8WVM7	Cohesin subunit SA-1 OS=Homo sapiens GN=STAG1 PE=1 SV=3	-0.811714	1.58366	0.396353	0.413714			2.95	0.69	0.023793	2	2	0	0	0	0	2	2	0	3	3	1	4	4	1	2	2	0	4	4	3	2	2	1	6	6	3	2	2	0	3	3	0	0	0	0	15.83	16.6249
SRPK2_HUMAN	P78362	SRSF protein kinase 2 OS=Homo sapiens GN=SRPK2 PE=1 SV=3	0.763334	1.43599	0.407585	0.560369			2.43	0.63	0.026338	2	2	0	1	1	0	2	2	1	1	1	0	1	1	0	1	1	0	2	2	1	3	2	1	3	3	1	5	4	2	3	2	0	0	0	0	19.1	19.89
HNRL2_HUMAN	Q1KMD3	Heterogeneous nuclear ribonucleoprotein U-like protein 2 OS=Homo sapiens GN=HNRNPUL2 PE=1 SV=1	0.706667	4.4698	0.546379	0.0422291			3.37	0.75	0.065138	3	3	3	2	2	2	2	2	2	2	2	2	2	2	2	2	2	2	7	7	7	5	5	5	4	4	4	2	2	2	1	1	1	0	0	0	19.09	21.12
MTA2_HUMAN	O94776	Metastasis-associated protein MTA2 OS=Homo sapiens GN=MTA2 PE=1 SV=1	-0.926666	2.9325	0.625522	0.217539			3.35	0.66	0.015481	3	3	2	1	1	1	1	1	1	3	3	2	1	1	1	4	4	4	7	7	7	5	5	5	7	7	6	4	4	4	3	3	2	0	0	0	17.93	19.27
MA7D3_HUMAN	Q8IWC1	MAP7 domain-containing protein 3 OS=Homo sapiens GN=MAP7D3 PE=1 SV=2	0.547445	1.02384	0.448725	0.481633			2.15	0.6	0.348098	1	1	1	0	0	0	0	0	0	0	0	0	0	0	0	1	1	1	3	3	3	1	1	1	2	2	2	2	2	2	2	2	2	0	0	0	15.23	16.7758
CHM1B_HUMAN	Q7LBR1	Charged multivesicular body protein 1b OS=Homo sapiens GN=CHMP1B PE=1 SV=1	1.03667	-2.20903	0.546373	0.416605			2.05	0.35	0.109689	1	1	1	1	1	1	3	3	3	1	1	1	1	1	1	1	1	1	0	0	0	0	0	0	0	0	0	2	2	2	0	0	0	0	0	0	18.31	21.6
RUAS1_HUMAN	Q66K80	Putative uncharacterized protein RUSC1-AS1 OS=Homo sapiens GN=RUSC1-AS1 PE=5 SV=1	3.01	0	0.181405	1			1.47	0.52	0.13741	2	1	1	1	1	1	2	1	1	1	1	1	1	1	1	1	1	1	0	0	0	0	0	0	0	0	0	0	0	0	0	0	0	0	0	0	23.31	22.52
TS101_HUMAN	Q99816	Tumor susceptibility gene 101 protein OS=Homo sapiens GN=TSG101 PE=1 SV=2	0.514343	0.647277	0.630404	0.818874			2.58	0.58	0.057647	2	2	2	0	0	0	0	0	0	1	1	1	1	1	1	0	0	0	3	3	3	3	3	3	1	1	1	4	4	4	4	4	4	0	0	0	17.9	16.3144
1C04_HUMAN	P30504	HLA class I histocompatibility antigen, Cw-4 alpha chain OS=Homo sapiens GN=HLA-C PE=1 SV=1	0.526607	3.20351	0.887501	0.00718461			4.99	0.71	0.033035	0	0	0	4	4	0	3	3	0	0	0	0	0	0	0	4	4	0	0	0	0	1	1	0	1	1	0	0	0	0	0	0	0	0	0	0	14.5717	23.7
F203A_HUMAN	Q9BTY7	Protein FAM203A OS=Homo sapiens GN=FAM203A PE=1 SV=1	0	-0.663681	1	0.783722			1.98	0.54	0.172977	0	0	0	0	0	0	0	0	0	0	0	0	0	0	0	0	0	0	0	0	0	1	1	0	2	2	0	4	4	0	2	2	0	0	0	0	15.4236	14.9785
DCD_HUMAN	P81605	Dermcidin OS=Homo sapiens GN=DCD PE=1 SV=2	-0.525479	4.88401	0.627599	0.170672			3.29	0.59	0.024237	1	1	1	0	0	0	0	0	0	0	0	0	1	1	1	0	0	0	3	2	2	2	1	1	4	2	2	2	1	1	0	0	0	0	0	0	17.18	17.3825
TGM3_HUMAN	Q08188	Protein-glutamine gamma-glutamyltransferase E OS=Homo sapiens GN=TGM3 PE=1 SV=4	-0.195183	2.0537	0.796475	0.307454			2.96	0.65	0.040697	1	1	1	0	0	0	0	0	0	1	1	1	0	0	0	0	0	0	5	4	4	1	1	1	2	1	1	2	1	1	1	1	1	0	0	0	15.77	15.641
RPA49_HUMAN	Q9GZS1	DNA-directed RNA polymerase I subunit RPA49 OS=Homo sapiens GN=POLR1E PE=1 SV=2	0	1.74967	1	0.520757			2.26	0.65	0.267403	0	0	0	0	0	0	0	0	0	0	0	0	0	0	0	0	0	0	3	3	3	4	4	4	2	2	2	4	4	4	2	2	2	0	0	0	14.0933	15.2971
CI114_HUMAN	Q5T280	Uncharacterized protein C9orf114 OS=Homo sapiens GN=C9orf114 PE=1 SV=3	-1.52126	1.33709	0.433852	0.579819			4.82	0.61	0.044839	2	2	2	0	0	0	1	1	1	1	1	1	0	0	0	3	2	2	2	2	2	2	2	2	3	2	2	2	2	2	3	2	2	0	0	0	18.17	15.7446
SNX6_HUMAN	Q9UNH7	Sorting nexin-6 OS=Homo sapiens GN=SNX6 PE=1 SV=1	-1.34659	0.869806	0.333291	0.822547			2.62	0.65	0.006587	3	3	3	0	0	0	1	1	1	2	2	2	2	2	2	1	1	1	3	3	3	6	6	6	4	4	4	5	5	5	7	7	6	0	0	0	18.72	15.2202
SMBP2_HUMAN	P38935	DNA-binding protein SMUBP-2 OS=Homo sapiens GN=IGHMBP2 PE=1 SV=3	0	1.65576	1	0.131951			2.49	0.5	0.116339	0	0	0	0	0	0	0	0	0	0	0	0	0	0	0	0	0	0	2	2	2	1	1	1	2	2	2	0	0	0	0	0	0	0	0	0	16.2301	16.947
RPP40_HUMAN	O75818	Ribonuclease P protein subunit p40 OS=Homo sapiens GN=RPP40 PE=1 SV=3	-2.01874	2.84144	0.23195	0.323879			3.3	0.73	0.094317	0	0	0	0	0	0	1	1	1	4	4	4	1	1	1	2	2	2	3	3	3	4	4	4	3	3	3	2	2	2	3	3	3	0	0	0	15.9301	16.9536
GFPT2_HUMAN	O94808	Glutamine--fructose-6-phosphate aminotransferase [isomerizing] 2 OS=Homo sapiens GN=GFPT2 PE=1 SV=3	0	2.45282	1	0.20132			1.81	0.48	0.020163	0	0	0	0	0	0	0	0	0	0	0	0	0	0	0	0	0	0	1	1	0	2	2	0	2	2	0	1	1	0	1	1	0	0	0	0	16.1584	16.6299
METK1_HUMAN	Q00266	S-adenosylmethionine synthase isoform type-1 OS=Homo sapiens GN=MAT1A PE=1 SV=2	-0.963369	4.47451	0.552076	0.159237			2.36	0.6	0.061148	1	1	0	0	0	0	0	0	0	2	2	0	1	1	0	0	0	0	1	1	0	1	1	0	1	1	0	1	1	0	0	0	0	0	0	0	20.34	17.5609
GDN_HUMAN	P07093	Glia-derived nexin OS=Homo sapiens GN=SERPINE2 PE=1 SV=1	0	2.15816	1	0.412853			3.08	0.71	0.02218	0	0	0	0	0	0	0	0	0	0	0	0	0	0	0	0	0	0	3	3	3	4	4	4	2	2	2	1	1	1	4	4	4	0	0	0	16.2913	17.3405
PPT1_HUMAN	P50897	Palmitoyl-protein thioesterase 1 OS=Homo sapiens GN=PPT1 PE=1 SV=1	0.0766665	-0.98762	0.946635	0.603587			3.25	0.71	0.030448	3	2	2	1	1	1	3	2	2	2	2	2	2	2	2	2	2	2	0	0	0	0	0	0	0	0	0	1	1	1	0	0	0	0	0	0	18.45	19.99
SMRC1_HUMAN	Q92922	SWI/SNF complex subunit SMARCC1 OS=Homo sapiens GN=SMARCC1 PE=1 SV=3	-2.40893	2.61578	0.0715211	0.343189			4.49	0.7	0.040859	7	6	3	0	0	0	0	0	0	6	6	3	7	7	3	5	5	2	8	8	4	6	6	3	7	7	4	4	4	2	6	6	3	0	0	0	18.95	16.4314
IGSF1_HUMAN	Q8N6C5	Immunoglobulin superfamily member 1 OS=Homo sapiens GN=IGSF1 PE=1 SV=3	0.27	0	0.88779	1			1.45	0.3	0.057959	1	1	1	2	1	1	2	1	1	1	1	1	1	1	1	2	1	1	0	0	0	0	0	0	0	0	0	0	0	0	0	0	0	0	0	0	17.54	22.22
TR112_HUMAN	Q9UI30	tRNA methyltransferase 112 homolog OS=Homo sapiens GN=TRMT112 PE=1 SV=1	0.86	-2.29831	0.581431	0.368277			3.56	0.78	0.02042	2	2	2	2	2	2	2	2	2	2	2	2	2	2	2	1	1	1	0	0	0	0	0	0	0	0	0	1	1	1	1	1	1	0	0	0	19.57	23.18
PCY1A_HUMAN	P49585	Choline-phosphate cytidylyltransferase A OS=Homo sapiens GN=PCYT1A PE=1 SV=2	-0.35882	1.01899	0.760609	0.686843			3.59	0.7	0.14094	1	1	0	0	0	0	0	0	0	0	0	0	1	1	0	1	1	0	2	2	1	2	2	1	3	3	1	2	2	1	3	3	1	0	0	0	16.7	16.863
SNF5_HUMAN	Q12824	SWI/SNF-related matrix-associated actin-dependent regulator of chromatin subfamily B member 1 OS=Homo sapiens GN=SMARCB1 PE=1 SV=2	0.286116	1.70969	0.555515	0.563205			3.1	0.65	0.215252	0	0	0	0	0	0	0	0	0	1	1	1	0	0	0	0	0	0	1	1	1	4	4	4	2	2	2	3	3	3	4	4	4	0	0	0	15.5053	16.6605
PTN11_HUMAN	Q06124	Tyrosine-protein phosphatase non-receptor type 11 OS=Homo sapiens GN=PTPN11 PE=1 SV=2	0	2.18637	1	0.22236			2.37	0.48	0.097328	0	0	0	0	0	0	0	0	0	0	0	0	0	0	0	0	0	0	2	2	2	3	3	3	1	1	1	1	1	1	1	1	1	0	0	0	15.9495	15.9065
NAA50_HUMAN	Q9GZZ1	N-alpha-acetyltransferase 50 OS=Homo sapiens GN=NAA50 PE=1 SV=1	-0.37	-2.60285	0.838137	0.374836			3.47	0.62	0.097606	2	2	2	3	3	3	2	2	2	3	3	3	3	3	3	5	5	5	0	0	0	0	0	0	0	0	0	2	2	2	2	2	2	0	0	0	19.03	21.64
DLRB1_HUMAN	Q9NP97	Dynein light chain roadblock-type 1 OS=Homo sapiens GN=DYNLRB1 PE=1 SV=3	1.10105	-1.75887	0.620744	0.414751			3.42	0.69	0.294196	0	0	0	1	1	0	1	1	0	0	0	0	1	1	0	2	2	1	0	0	0	0	0	0	0	0	0	1	1	0	0	0	0	0	0	0	17.3713	21.37
LANC2_HUMAN	Q9NS86	LanC-like protein 2 OS=Homo sapiens GN=LANCL2 PE=1 SV=1	0.0506512	2.01844	0.948053	0.472381			3.21	0.71	0.106713	0	0	0	0	0	0	0	0	0	1	1	1	1	1	1	0	0	0	4	4	4	3	3	3	3	3	3	3	3	3	3	3	3	0	0	0	15.181	16.8527
MED17_HUMAN	Q9NVC6	Mediator of RNA polymerase II transcription subunit 17 OS=Homo sapiens GN=MED17 PE=1 SV=2	1.60705	2.80077	0.0678319	0.192288			2.66	0.55	0.034047	1	1	1	0	0	0	0	0	0	0	0	0	0	0	0	0	0	0	2	2	2	2	2	2	1	1	1	0	0	0	3	3	3	0	0	0	15.75	17.6271
SPB4_HUMAN	P48594	Serpin B4 OS=Homo sapiens GN=SERPINB4 PE=1 SV=2	0	2.62119	1	0.407882			2.35	0.6	0.033221	0	0	0	0	0	0	0	0	0	0	0	0	0	0	0	0	0	0	8	4	0	4	2	0	1	1	0	3	2	0	2	2	0	0	0	0	15.416	16.2595
SLIRP_HUMAN	Q9GZT3	SRA stem-loop-interacting RNA-binding protein, mitochondrial OS=Homo sapiens GN=SLIRP PE=1 SV=1	1.20336	3.54803	0.807071	0.0416481			4.09	0.75	0.004231	0	0	0	16	7	7	5	4	4	0	0	0	3	3	3	7	6	6	0	0	0	1	1	1	1	1	1	0	0	0	0	0	0	0	0	0	15.2369	28.26
SIN3A_HUMAN	Q96ST3	Paired amphipathic helix protein Sin3a OS=Homo sapiens GN=SIN3A PE=1 SV=2	-2.23166	2.07776	0.117209	0.421421	Q96ST3		3.3	0.62	0.009255	4	4	4	0	0	0	1	1	1	6	6	6	2	2	2	4	4	4	9	9	9	3	3	3	5	5	5	6	6	6	5	5	5	0	0	0	17.1	13.825
1B51_HUMAN	P18464	HLA class I histocompatibility antigen, B-51 alpha chain OS=Homo sapiens GN=HLA-B PE=1 SV=1	2.02327	3.07695	0.582909	0.0477159			4.99	0.71	0.193652	0	0	0	4	4	0	3	3	0	0	0	0	0	0	0	3	3	0	0	0	0	1	1	0	1	1	0	0	0	0	0	0	0	0	0	0	16.1705	23.76
ALKB4_HUMAN	Q9NXW9	Alpha-ketoglutarate-dependent dioxygenase alkB homolog 4 OS=Homo sapiens GN=ALKBH4 PE=1 SV=1	-2.27074	1.50676	0.261448	0.642446			2.13	0.54	0.021736	2	2	2	0	0	0	1	1	1	2	2	2	3	3	3	1	1	1	3	3	3	3	2	2	1	1	1	3	3	3	3	2	2	0	0	0	17.9	15.3178
H4_HUMAN	P62805	Histone H4 OS=Homo sapiens GN=HIST1H4A PE=1 SV=2	-0.853334	-3.88667	0.688083	0.112388			4.83	0.73	0.009885	20	11	11	22	12	12	17	10	10	30	13	13	19	10	10	43	17	17	10	4	4	6	4	4	8	6	6	38	15	15	8	4	4	13	7	7	26.17	30.09
PRDX1_HUMAN	Q06830	Peroxiredoxin-1 OS=Homo sapiens GN=PRDX1 PE=1 SV=1	0.496666	-1.83333	0.735098	0.0787786			4.97	0.76	0.000413	34	13	10	30	14	11	35	12	9	30	15	12	32	15	12	30	13	10	33	15	12	41	16	13	37	15	12	34	15	12	38	16	13	13	11	8	26.47	29.43
RL38_HUMAN	P63173	60S ribosomal protein L38 OS=Homo sapiens GN=RPL38 PE=1 SV=2	0.973333	-1.7	0.63552	0.105481			4.28	0.73	0.004455	17	5	5	15	5	5	20	7	7	13	5	5	16	6	6	22	7	7	15	5	5	16	5	5	20	7	7	15	5	5	16	5	5	9	5	5	25.47	29.87
H2A2C_HUMAN	Q16777	Histone H2A type 2-C OS=Homo sapiens GN=HIST2H2AC PE=1 SV=4	-0.746666	-4.06	0.709735	0.0761849			4.66	0.73	0.00308	8	3	0	11	4	0	7	4	0	9	3	0	10	3	0	14	5	0	3	2	0	4	3	0	6	3	0	13	4	0	7	3	0	7	4	0	25.83	29.62
H2AJ_HUMAN	Q9BTM1	Histone H2A.J OS=Homo sapiens GN=H2AFJ PE=1 SV=1	-0.746666	-4.06	0.709735	0.0761849			4.66	0.73	0.00308	8	3	0	11	4	0	7	4	0	9	3	0	10	3	0	14	5	0	3	2	0	4	3	0	6	3	0	13	4	0	7	3	0	7	4	0	25.83	29.62
H2AV_HUMAN	Q71UI9	Histone H2A.V OS=Homo sapiens GN=H2AFV PE=1 SV=3	-0.696667	-4.11	0.733902	0.0753077			3.65	0.57	0.00308	8	4	0	8	4	0	5	3	0	9	4	0	7	2	0	9	4	0	3	2	0	2	2	0	5	3	0	10	3	0	6	2	0	6	3	0	25.77	29.66
H2AZ_HUMAN	P0C0S5	Histone H2A.Z OS=Homo sapiens GN=H2AFZ PE=1 SV=2	-0.696667	-4.11	0.733902	0.0753077			3.65	0.57	0.00308	8	4	0	8	4	0	5	3	0	9	4	0	7	2	0	9	4	0	3	2	0	2	2	0	5	3	0	10	3	0	6	2	0	6	3	0	25.77	29.66
H2A1_HUMAN	P0C0S8	Histone H2A type 1 OS=Homo sapiens GN=HIST1H2AG PE=1 SV=2	-0.750001	-4.05667	0.708714	0.0767313			4.66	0.73	0.00308	8	3	0	11	4	0	7	4	0	9	3	0	10	3	0	14	5	0	3	2	0	4	3	0	6	3	0	13	4	0	7	3	0	7	4	0	25.6	29.4
H2A1D_HUMAN	P20671	Histone H2A type 1-D OS=Homo sapiens GN=HIST1H2AD PE=1 SV=2	-0.750001	-4.05667	0.708714	0.0767313			4.66	0.73	0.00308	8	3	0	11	4	0	7	4	0	9	3	0	10	3	0	14	5	0	3	2	0	4	3	0	6	3	0	13	4	0	7	3	0	7	4	0	25.6	29.4
H2A1H_HUMAN	Q96KK5	Histone H2A type 1-H OS=Homo sapiens GN=HIST1H2AH PE=1 SV=3	-0.750001	-4.05667	0.708714	0.0767313			4.66	0.73	0.00308	8	3	0	11	4	0	7	4	0	9	3	0	10	3	0	14	5	0	3	2	0	4	3	0	6	3	0	13	4	0	7	3	0	7	4	0	25.6	29.4
H2A1J_HUMAN	Q99878	Histone H2A type 1-J OS=Homo sapiens GN=HIST1H2AJ PE=1 SV=3	-0.750001	-4.05667	0.708714	0.0767313			4.66	0.73	0.00308	8	3	0	11	4	0	7	4	0	9	3	0	10	3	0	14	5	0	3	2	0	4	3	0	6	3	0	13	4	0	7	3	0	7	4	0	25.6	29.4
H2A2A_HUMAN	Q6FI13	Histone H2A type 2-A OS=Homo sapiens GN=HIST2H2AA3 PE=1 SV=3	-0.750001	-4.05667	0.708714	0.0767313			4.66	0.73	0.00308	8	3	0	11	4	0	7	4	0	9	3	0	10	3	0	14	5	0	3	2	0	4	3	0	6	3	0	13	4	0	7	3	0	7	4	0	25.6	29.4
H2A1B_HUMAN	P04908	Histone H2A type 1-B/E OS=Homo sapiens GN=HIST1H2AB PE=1 SV=2	-0.716667	-4.14333	0.724383	0.073169			4.66	0.73	0.00308	7	3	0	10	3	0	6	4	0	9	3	0	9	3	0	13	5	0	3	2	0	2	2	0	5	3	0	12	4	0	7	3	0	7	4	0	25.52	29.4
H2A1C_HUMAN	Q93077	Histone H2A type 1-C OS=Homo sapiens GN=HIST1H2AC PE=1 SV=3	-0.716667	-4.14333	0.724383	0.073169			4.66	0.73	0.00308	7	3	0	10	3	0	6	4	0	9	3	0	9	3	0	13	5	0	3	2	0	2	2	0	5	3	0	12	4	0	7	3	0	7	4	0	25.52	29.4
H2A3_HUMAN	Q7L7L0	Histone H2A type 3 OS=Homo sapiens GN=HIST3H2A PE=1 SV=3	-0.716667	-4.14333	0.724383	0.073169			4.66	0.73	0.00308	7	3	0	10	3	0	6	4	0	9	3	0	9	3	0	13	5	0	3	2	0	2	2	0	5	3	0	12	4	0	7	3	0	7	4	0	25.52	29.4
H2A1A_HUMAN	Q96QV6	Histone H2A type 1-A OS=Homo sapiens GN=HIST1H2AA PE=1 SV=3	-0.71	-4.12667	0.727754	0.0742217			3.33	0.51	0.00308	6	2	0	6	2	0	4	2	0	7	2	0	7	2	0	8	3	0	3	2	0	2	2	0	4	2	0	10	3	0	6	2	0	5	2	0	25.5	29.39
EF1A1_HUMAN	P68104	Elongation factor 1-alpha 1 OS=Homo sapiens GN=EEF1A1 PE=1 SV=1	0.203333	-0.710001	0.87549	0.0548791			6.58	0.77	0.000636	49	14	0	53	12	0	55	12	0	41	12	0	47	12	0	48	13	0	38	13	0	52	18	0	53	19	0	53	20	0	60	17	0	42	11	0	27.56	30.5
EF1A3_HUMAN	Q5VTE0	Putative elongation factor 1-alpha-like 3 OS=Homo sapiens GN=EEF1A1P5 PE=5 SV=1	0.203333	-0.710001	0.87549	0.0548791			6.58	0.77	0.000636	49	14	0	53	12	0	55	12	0	41	12	0	47	12	0	48	13	0	38	13	0	52	18	0	53	19	0	53	20	0	60	17	0	42	11	0	27.56	30.5
ENOA_HUMAN	P06733	Alpha-enolase OS=Homo sapiens GN=ENO1 PE=1 SV=2	0.556667	-1.43333	0.655894	0.0767531			5.48	0.79	0.002219	50	20	19	48	24	22	41	20	19	41	17	16	40	22	21	43	25	24	30	18	16	64	29	27	67	27	26	54	22	21	63	28	26	42	22	21	26.4	28.8
EF1A2_HUMAN	Q05639	Elongation factor 1-alpha 2 OS=Homo sapiens GN=EEF1A2 PE=1 SV=1	0.216666	-0.676667	0.867828	0.0519725			5.88	0.77	0.000636	39	11	2	44	10	3	45	9	2	33	8	1	36	9	2	41	10	2	29	9	2	34	12	4	34	13	4	40	14	4	46	13	5	36	9	1	27.24	30.19
H31_HUMAN	P68431	Histone H3.1 OS=Homo sapiens GN=HIST1H3A PE=1 SV=2	-0.916666	-3.59	0.633945	0.109873			2.68	0.59	0.009084	5	3	0	5	5	0	5	4	0	5	2	0	6	4	0	8	7	0	3	1	0	3	2	0	4	3	0	8	4	0	3	3	0	3	3	0	25.4	28.94
H31T_HUMAN	Q16695	Histone H3.1t OS=Homo sapiens GN=HIST3H3 PE=1 SV=3	-0.916666	-3.59	0.633945	0.109873			2.68	0.59	0.009084	5	3	0	5	5	0	5	4	0	5	2	0	6	4	0	8	7	0	3	1	0	3	2	0	4	3	0	8	4	0	3	3	0	3	3	0	25.4	28.94
H32_HUMAN	Q71DI3	Histone H3.2 OS=Homo sapiens GN=HIST2H3A PE=1 SV=3	-0.916666	-3.59	0.633945	0.109873			2.68	0.59	0.009084	5	3	0	5	5	0	5	4	0	5	2	0	6	4	0	8	7	0	3	1	0	3	2	0	4	3	0	8	4	0	3	3	0	3	3	0	25.4	28.94
H33_HUMAN	P84243	Histone H3.3 OS=Homo sapiens GN=H3F3A PE=1 SV=2	-0.916666	-3.59	0.633945	0.109873			2.68	0.59	0.009084	5	3	0	5	5	0	5	4	0	5	2	0	6	4	0	8	7	0	3	1	0	3	2	0	4	3	0	8	4	0	3	3	0	3	3	0	25.4	28.94
LDHA_HUMAN	P00338	L-lactate dehydrogenase A chain OS=Homo sapiens GN=LDHA PE=1 SV=2	0.44	-2.34	0.780995	0.0520475			4.82	0.73	0.001879	24	17	17	26	16	16	31	16	16	21	14	14	23	15	15	29	16	16	23	12	12	43	16	16	34	14	14	37	19	19	44	20	20	19	15	15	25.2	28.64
H2AX_HUMAN	P16104	Histone H2A.x OS=Homo sapiens GN=H2AFX PE=1 SV=2	-0.713333	-4.13333	0.726264	0.073932			3.33	0.51	0.00308	6	2	0	6	2	0	4	2	0	7	2	0	7	2	0	8	3	0	3	2	0	2	2	0	4	2	0	10	3	0	6	2	0	5	2	0	25.14	29.02
NDKA_HUMAN	P15531	Nucleoside diphosphate kinase A OS=Homo sapiens GN=NME1 PE=1 SV=1	0.846667	-2.19333	0.602479	0.0591225			4.36	0.73	0.000459	16	9	4	22	12	7	16	9	4	12	8	4	15	9	4	18	10	6	9	6	2	16	9	5	15	10	5	17	10	5	14	10	5	12	9	4	25.78	29.06
LDHB_HUMAN	P07195	L-lactate dehydrogenase B chain OS=Homo sapiens GN=LDHB PE=1 SV=2	0.713334	-2.02	0.682761	0.0937793			4.43	0.72	0.004824	21	14	14	24	17	17	23	14	14	18	13	13	26	13	13	26	15	15	17	11	11	41	15	15	27	13	13	31	15	15	29	12	12	15	11	11	25.23	28.7
NDKB_HUMAN	P22392	Nucleoside diphosphate kinase B OS=Homo sapiens GN=NME2 PE=1 SV=1	0.873333	-2.21333	0.583504	0.0556828			4.36	0.73	0.000459	11	7	0	20	11	3	12	8	1	10	5	0	12	7	1	13	9	2	9	6	0	15	7	0	12	7	0	14	7	1	14	8	1	8	6	0	25.64	28.86
H3C_HUMAN	Q6NXT2	Histone H3.3C OS=Homo sapiens GN=H3F3C PE=1 SV=3	-0.863333	-3.51	0.656612	0.116435			2.68	0.59	0.009084	3	2	0	3	3	0	2	2	0	3	1	0	4	3	0	6	5	0	3	1	0	2	1	0	2	2	0	6	3	0	2	2	0	1	1	0	25.28	28.84
PPIA_HUMAN	P62937	Peptidyl-prolyl cis-trans isomerase A OS=Homo sapiens GN=PPIA PE=1 SV=2	0.98	-2.75667	0.634974	0.0607434			4.13	0.71	0.005178	26	13	12	31	14	13	28	13	12	26	13	12	19	12	11	31	14	12	21	9	9	24	12	11	19	9	9	25	11	11	30	13	12	19	12	11	24.99	29.03
RS20_HUMAN	P60866	40S ribosomal protein S20 OS=Homo sapiens GN=RPS20 PE=1 SV=1	0.636667	-1.07667	0.732069	0.0702692			4.47	0.73	0.001908	10	4	4	15	4	4	16	5	5	10	3	3	11	4	4	13	4	4	10	3	3	12	5	5	13	5	5	9	5	5	12	5	5	6	3	3	26.28	30.14
H2A2B_HUMAN	Q8IUE6	Histone H2A type 2-B OS=Homo sapiens GN=HIST2H2AB PE=1 SV=3	-0.809999	-4.73333	0.691042	0.0599633			2.52	0.45	0.025007	3	1	0	4	1	0	3	1	0	5	1	0	6	2	1	6	2	1	2	1	0	1	1	0	3	1	0	6	1	0	4	1	0	3	1	0	24.7	28.62
G3P_HUMAN	P04406	Glyceraldehyde-3-phosphate dehydrogenase OS=Homo sapiens GN=GAPDH PE=1 SV=3	0.633333	-1.43333	0.696317	0.112101			5.99	0.81	0.003394	43	21	19	53	25	24	45	21	20	27	15	14	41	20	19	53	22	21	38	17	16	56	24	22	56	25	23	53	18	17	52	19	19	34	18	17	25.48	28.96
PRDX2_HUMAN	P32119	Peroxiredoxin-2 OS=Homo sapiens GN=PRDX2 PE=1 SV=5	0.266667	-1.41	0.841385	0.110287			3.51	0.68	0.007787	13	7	6	12	7	6	14	10	9	16	8	7	15	8	7	16	9	8	16	8	7	15	7	6	17	9	8	13	7	6	17	9	8	7	6	5	25.13	28.01
RL40_HUMAN	P62987	Ubiquitin-60S ribosomal protein L40 OS=Homo sapiens GN=UBA52 PE=1 SV=2	0.72	-1.24	0.618173	0.200001			4.33	0.73	0.000356	48	6	0	41	6	0	44	6	0	34	4	0	46	6	0	49	6	0	31	6	0	38	6	0	33	6	0	47	6	0	41	6	0	18	6	0	25.92	29.04
HSP7C_HUMAN	P11142	Heat shock cognate 71 kDa protein OS=Homo sapiens GN=HSPA8 PE=1 SV=1	0.256667	0.0400003	0.829899	0.929372			5.94	0.82	0.000488	95	38	29	92	38	30	113	37	27	90	36	27	95	34	23	96	38	29	106	33	24	99	35	24	103	33	23	86	32	23	93	28	19	56	26	17	27.77	30.43
HS90B_HUMAN	P08238	Heat shock protein HSP 90-beta OS=Homo sapiens GN=HSP90AB1 PE=1 SV=4	0.41	-0.443333	0.761092	0.427958			5.37	0.82	0.002233	83	37	9	83	39	11	73	34	10	60	29	6	71	34	10	70	36	12	77	33	10	102	42	12	109	43	11	114	40	10	131	37	11	81	33	7	26.42	29.27
PPIB_HUMAN	P23284	Peptidyl-prolyl cis-trans isomerase B OS=Homo sapiens GN=PPIB PE=1 SV=2	0.403334	-2.11667	0.826196	0.0627108			4.02	0.78	0.001011	28	16	16	32	17	17	35	19	19	27	18	18	22	14	14	39	19	19	12	12	12	24	15	15	25	16	16	31	18	18	29	18	18	15	12	12	24.92	28.9
RL12_HUMAN	P30050	60S ribosomal protein L12 OS=Homo sapiens GN=RPL12 PE=1 SV=1	0.46	-1.14	0.773795	0.0998093			3.85	0.74	0.01064	5	2	2	11	3	3	9	3	3	4	2	2	6	2	2	8	3	3	7	4	4	8	4	4	9	5	5	8	3	3	7	4	4	5	3	3	25.02	28.61
RLA0_HUMAN	P05388	60S acidic ribosomal protein P0 OS=Homo sapiens GN=RPLP0 PE=1 SV=1	1.36667	-0.536667	0.554749	0.379274			7.26	0.82	0.000472	14	9	2	27	13	4	25	14	3	8	6	2	10	9	1	28	14	6	18	8	2	29	15	5	23	12	3	21	9	3	22	12	4	16	9	2	23.89	28.78
RL39_HUMAN	P62891	60S ribosomal protein L39 OS=Homo sapiens GN=RPL39 PE=2 SV=2	0.67	-1.28667	0.704138	0.0757353			3.19	0.47	0.041583	2	2	0	2	2	0	2	2	0	2	2	0	2	2	0	2	2	0	2	2	0	2	2	0	2	2	0	1	1	0	1	1	0	1	1	0	25.39	29.37
R39L5_HUMAN	Q59GN2	Putative 60S ribosomal protein L39-like 5 OS=Homo sapiens GN=RPL39P5 PE=5 SV=2	0.67	-1.28667	0.704138	0.0757353			3.19	0.47	0.041583	2	2	0	2	2	0	2	2	0	2	2	0	2	2	0	2	2	0	2	2	0	2	2	0	2	2	0	1	1	0	1	1	0	1	1	0	25.39	29.37
RA1L2_HUMAN	Q32P51	Heterogeneous nuclear ribonucleoprotein A1-like 2 OS=Homo sapiens GN=HNRNPA1L2 PE=2 SV=2	1.07	-1.30667	0.550626	0.0892076			4.62	0.78	0.000308	25	10	0	30	11	0	25	10	0	15	6	0	15	6	0	30	9	0	19	5	0	26	7	0	24	8	0	23	6	0	25	8	0	13	7	0	24.75	28.55
RS27A_HUMAN	P62979	Ubiquitin-40S ribosomal protein S27a OS=Homo sapiens GN=RPS27A PE=1 SV=2	0.723333	-1.24	0.616461	0.200001			4.33	0.73	0.000356	48	6	0	41	6	0	44	6	0	34	4	0	46	6	0	49	6	0	31	6	0	38	6	0	33	6	0	47	6	0	41	6	0	18	6	0	25.63	28.75
RL17_HUMAN	P18621	60S ribosomal protein L17 OS=Homo sapiens GN=RPL17 PE=1 SV=3	0.356667	-1.06333	0.841167	0.0935276			4.66	0.7	0.00576	14	6	6	25	10	10	24	10	10	17	8	8	19	8	8	28	11	11	18	9	9	18	8	8	22	9	9	17	8	8	21	9	9	12	9	9	24.66	28.93
1433E_HUMAN	P62258	14-3-3 protein epsilon OS=Homo sapiens GN=YWHAE PE=1 SV=1	0.423333	-1.70333	0.777218	0.0934808			4.45	0.74	0.001981	31	18	16	31	20	18	31	19	16	25	17	15	22	14	12	33	19	17	20	14	13	28	16	14	23	15	13	26	15	13	22	14	12	16	12	11	25.25	28.23
RS18_HUMAN	P62269	40S ribosomal protein S18 OS=Homo sapiens GN=RPS18 PE=1 SV=3	0.556667	-1.37333	0.779359	0.0611249			3.66	0.67	0.012523	21	12	12	22	11	11	26	14	14	21	12	12	24	13	13	25	15	15	20	14	14	20	13	13	19	14	14	19	14	14	24	16	16	12	10	10	25.45	29.88
RL7_HUMAN	P18124	60S ribosomal protein L7 OS=Homo sapiens GN=RPL7 PE=1 SV=1	0.52	-0.72	0.763853	0.230167			4.21	0.7	0.002177	33	19	19	31	18	18	42	22	22	29	18	18	35	19	19	43	21	21	41	20	20	38	19	19	35	19	19	38	19	19	40	20	20	12	9	9	25.92	29.72
RL31_HUMAN	P62899	60S ribosomal protein L31 OS=Homo sapiens GN=RPL31 PE=1 SV=1	0.256667	-0.973334	0.87436	0.111193			4.27	0.75	0.015172	9	5	5	10	7	7	12	9	9	10	6	6	8	6	6	14	8	8	13	7	7	11	7	7	16	9	9	14	8	8	13	7	7	4	4	4	25.37	29.06
TBB5_HUMAN	P07437	Tubulin beta chain OS=Homo sapiens GN=TUBB PE=1 SV=2	0.636667	-0.656666	0.612151	0.0901356			7.94	0.8	0.000305	66	25	5	67	27	5	68	27	4	54	24	5	59	26	5	64	29	5	58	22	3	77	30	3	88	31	3	64	20	2	87	32	4	41	21	2	26.98	29.84
RS14_HUMAN	P62263	40S ribosomal protein S14 OS=Homo sapiens GN=RPS14 PE=1 SV=3	0.0866661	-1.01333	0.96093	0.055127			5.73	0.75	0.006277	12	8	8	15	8	8	18	10	10	15	9	9	19	9	9	17	9	9	16	9	9	19	9	9	18	8	8	13	7	7	21	10	10	7	6	6	25.26	29.39
RL14_HUMAN	P50914	60S ribosomal protein L14 OS=Homo sapiens GN=RPL14 PE=1 SV=4	0.3	-1.32333	0.850617	0.0522568			3.16	0.69	0.002213	9	4	4	8	4	4	8	5	5	9	5	5	7	4	4	11	5	5	11	6	6	11	5	5	15	7	7	10	6	6	12	7	7	5	3	3	24.48	28.14
THIO_HUMAN	P10599	Thioredoxin OS=Homo sapiens GN=TXN PE=1 SV=3	0.903333	-2.48333	0.51175	0.0674546			4	0.67	0.009042	7	4	4	7	5	5	7	4	4	8	4	4	6	4	4	6	3	3	3	3	3	4	3	3	6	4	4	6	4	4	6	3	3	5	4	4	25.14	28
RS16_HUMAN	P62249	40S ribosomal protein S16 OS=Homo sapiens GN=RPS16 PE=1 SV=2	0.416667	-1.31	0.814768	0.082578			4.01	0.67	0.004584	18	10	10	22	11	11	29	12	12	17	10	10	21	10	10	26	12	12	16	10	10	17	10	10	16	10	10	15	10	10	20	13	13	9	6	6	25.92	29.99
PRDX4_HUMAN	Q13162	Peroxiredoxin-4 OS=Homo sapiens GN=PRDX4 PE=1 SV=1	0.706666	-2.21333	0.680843	0.0811766			3.82	0.73	0.000413	14	6	4	12	7	5	15	7	5	12	6	4	11	6	4	16	8	6	8	5	3	11	5	3	11	5	3	10	7	5	11	6	4	8	7	5	24.13	27.58
RLA0L_HUMAN	Q8NHW5	60S acidic ribosomal protein P0-like OS=Homo sapiens GN=RPLP0P6 PE=5 SV=1	1.50667	-0.496666	0.5372	0.319396			3.59	0.77	0.000472	11	7	0	18	9	0	19	11	0	6	4	0	9	8	0	18	8	0	15	6	0	22	10	0	18	9	0	14	6	0	17	8	0	13	7	0	23.2	28.27
RL10A_HUMAN	P62906	60S ribosomal protein L10a OS=Homo sapiens GN=RPL10A PE=1 SV=2	0.28	-0.573332	0.848081	0.256765			4.52	0.7	0.005132	23	11	11	23	11	11	27	12	12	21	12	12	21	10	10	27	13	13	25	11	11	25	12	12	31	15	15	34	17	17	36	15	15	10	7	7	26.09	29.32
HS90A_HUMAN	P07900	Heat shock protein HSP 90-alpha OS=Homo sapiens GN=HSP90AA1 PE=1 SV=5	0.436666	-0.34	0.75649	0.518024			5.17	0.8	0.002233	67	34	13	77	33	12	62	30	10	51	31	12	57	28	10	63	32	12	58	27	11	81	36	14	90	38	14	78	32	10	94	31	12	59	30	11	26.04	29.05
NDK8_HUMAN	O60361	Putative nucleoside diphosphate kinase OS=Homo sapiens GN=NME2P1 PE=5 SV=1	0.896666	-2.25	0.57783	0.0729424			4.36	0.73	0.012436	7	4	0	11	5	0	7	4	0	7	3	0	7	3	0	7	4	0	5	3	0	11	5	0	8	4	0	8	3	0	8	4	0	4	3	0	24.59	27.96
RS7_HUMAN	P62081	40S ribosomal protein S7 OS=Homo sapiens GN=RPS7 PE=1 SV=1	0.246667	-0.916666	0.8793	0.0727247			5.26	0.72	0.001032	11	8	8	16	9	9	22	10	10	10	5	5	13	8	8	19	12	12	12	7	7	13	8	8	13	8	8	14	9	9	14	10	10	6	6	6	25.02	28.8
TBB4B_HUMAN	P68371	Tubulin beta-4B chain OS=Homo sapiens GN=TUBB4B PE=1 SV=1	0.65	-0.626667	0.608152	0.111414			7.94	0.8	0.000305	57	21	1	64	25	1	61	25	1	45	21	1	49	22	1	58	26	1	49	20	1	73	29	1	78	29	1	58	20	1	76	29	1	38	21	1	26.77	29.63
1433Z_HUMAN	P63104	14-3-3 protein zeta/delta OS=Homo sapiens GN=YWHAZ PE=1 SV=1	0.563334	-1.92	0.719861	0.119663			4.85	0.79	0.004012	14	9	7	13	8	5	16	12	8	12	8	6	15	9	7	17	12	8	12	7	6	15	10	8	16	10	8	16	9	7	16	11	9	6	4	3	24.6	27.89
RS8_HUMAN	P62241	40S ribosomal protein S8 OS=Homo sapiens GN=RPS8 PE=1 SV=2	0.486667	-1.26	0.804846	0.0762899			3.85	0.7	0.006374	16	10	10	22	10	10	28	12	12	18	10	10	16	10	10	27	11	11	16	10	10	18	10	10	17	11	11	18	11	11	16	10	10	8	7	7	24.95	29.36
RS27_HUMAN	P42677	40S ribosomal protein S27 OS=Homo sapiens GN=RPS27 PE=1 SV=3	0.123333	-1.18333	0.937568	0.0791632			3.68	0.71	0.004566	9	5	3	10	4	3	16	6	3	10	6	3	11	5	3	13	5	3	11	5	3	15	6	3	12	6	3	12	5	3	12	5	3	7	5	3	25.16	28.63
RL35A_HUMAN	P18077	60S ribosomal protein L35a OS=Homo sapiens GN=RPL35A PE=1 SV=2	0.206666	-0.926667	0.886257	0.146629			2.64	0.68	0.007153	8	6	6	10	8	8	12	9	9	11	10	10	8	7	7	8	8	8	9	7	7	12	10	10	10	8	8	9	7	7	10	7	7	5	5	5	24.78	28.58
RS3_HUMAN	P23396	40S ribosomal protein S3 OS=Homo sapiens GN=RPS3 PE=1 SV=2	0.793334	-1.34333	0.678567	0.0940952			6.27	0.78	0.000699	41	17	17	49	23	23	67	20	20	40	15	15	31	15	15	59	24	24	30	14	14	40	18	18	43	20	20	36	16	16	42	18	18	15	10	10	25.58	29.7
PROF1_HUMAN	P07737	Profilin-1 OS=Homo sapiens GN=PFN1 PE=1 SV=2	0.803333	-2.41	0.600061	0.123229			3.94	0.76	0.001	14	9	9	15	9	9	15	10	10	8	6	6	10	6	6	16	10	10	5	5	5	14	10	10	9	8	8	13	8	8	11	8	8	7	6	6	24.79	27.72
RS3A_HUMAN	P61247	40S ribosomal protein S3a OS=Homo sapiens GN=RPS3A PE=1 SV=2	0.156666	-1.07333	0.928924	0.0545692			4.09	0.79	0.003613	17	11	11	26	16	16	29	15	15	21	13	13	23	14	14	29	17	17	21	14	14	23	16	16	22	15	15	23	15	15	21	14	14	10	8	8	25.11	29.14
PRDX6_HUMAN	P30041	Peroxiredoxin-6 OS=Homo sapiens GN=PRDX6 PE=1 SV=3	0.48	-2.15667	0.765338	0.0741177			4.65	0.77	0.00289	10	8	8	15	11	11	12	9	9	8	7	7	13	10	10	16	10	10	9	6	6	15	10	10	13	8	8	13	9	9	13	11	11	8	6	6	23.44	27.16
1433G_HUMAN	P61981	14-3-3 protein gamma OS=Homo sapiens GN=YWHAG PE=1 SV=2	0.476667	-2.04333	0.760508	0.103947			3.49	0.7	0.015845	10	6	4	11	7	4	12	9	5	8	6	4	9	6	4	13	9	6	7	5	4	10	7	5	12	7	5	12	7	5	8	6	4	3	3	2	24.58	27.83
RS11_HUMAN	P62280	40S ribosomal protein S11 OS=Homo sapiens GN=RPS11 PE=1 SV=3	0.499999	-0.810001	0.763628	0.133827			3	0.65	0.012937	7	5	5	10	7	7	15	10	10	11	7	7	12	7	7	13	9	9	14	10	10	13	8	8	13	10	10	11	8	8	11	7	7	5	4	4	24.97	28.67
1433T_HUMAN	P27348	14-3-3 protein theta OS=Homo sapiens GN=YWHAQ PE=1 SV=1	0.580001	-2.52	0.719141	0.0944886			5.28	0.77	0.015845	10	6	4	11	7	4	11	8	5	8	5	3	7	4	2	12	10	6	6	4	3	9	7	5	10	7	5	10	6	4	10	8	6	4	3	2	24.43	27.78
1433F_HUMAN	Q04917	14-3-3 protein eta OS=Homo sapiens GN=YWHAH PE=1 SV=4	0.586667	-2.63333	0.713292	0.11208			4.02	0.73	0.015845	10	7	5	10	7	4	12	9	5	8	6	4	8	6	4	11	9	6	8	5	4	11	8	6	8	5	3	10	6	4	8	6	4	4	4	3	24.51	27.82
1433B_HUMAN	P31946	14-3-3 protein beta/alpha OS=Homo sapiens GN=YWHAB PE=1 SV=3	0.506666	-2.21	0.750707	0.0970125			5.11	0.74	0.015845	12	8	6	14	10	6	14	10	6	10	6	4	8	5	3	12	10	5	5	4	3	7	5	3	9	6	4	10	6	4	7	5	3	3	3	2	24.71	28.05
IF5A1_HUMAN	P63241	Eukaryotic translation initiation factor 5A-1 OS=Homo sapiens GN=EIF5A PE=1 SV=2	0.746667	-2.27	0.696454	0.11912			4.1	0.73	0.001029	8	5	2	8	5	2	9	6	2	6	5	2	6	4	2	8	6	2	4	2	1	7	5	2	7	6	2	6	5	2	7	5	2	5	4	1	23.74	27.9
1433S_HUMAN	P31947	14-3-3 protein sigma OS=Homo sapiens GN=SFN PE=1 SV=1	0.566667	-2.41667	0.721368	0.133684			4.67	0.72	0.001736	14	9	7	15	10	8	15	11	8	9	6	4	13	10	8	14	11	9	16	10	9	11	7	5	12	8	6	14	9	7	11	8	6	3	2	1	24.44	27.77
TBB2A_HUMAN	Q13885	Tubulin beta-2A chain OS=Homo sapiens GN=TUBB2A PE=1 SV=1	0.636667	-0.553333	0.599285	0.151676			7.94	0.8	0.000305	46	18	0	47	19	0	48	20	0	37	17	0	42	18	0	48	21	0	39	16	1	59	24	0	64	27	1	47	16	1	63	25	1	31	17	0	26.46	29.24
TBB2B_HUMAN	Q9BVA1	Tubulin beta-2B chain OS=Homo sapiens GN=TUBB2B PE=1 SV=1	0.636667	-0.56	0.599285	0.150972			7.94	0.8	0.000305	46	18	0	47	19	0	48	20	0	37	17	0	42	18	0	48	21	0	38	15	0	59	24	0	63	26	0	46	15	0	62	24	0	31	17	0	26.46	29.24
UBB_HUMAN	P0CG47	Polyubiquitin-B OS=Homo sapiens GN=UBB PE=1 SV=1	0.720001	-1.24	0.618173	0.200001			4.33	0.73	0.000356	48	6	0	41	6	0	44	6	0	34	4	0	46	6	0	49	6	0	31	6	0	38	6	0	33	6	0	47	6	0	41	6	0	18	6	0	24.7	27.82
RS4X_HUMAN	P62701	40S ribosomal protein S4, X isoform OS=Homo sapiens GN=RPS4X PE=1 SV=2	0.323333	-0.91	0.867282	0.174823			5.58	0.74	0.001632	32	12	4	34	14	6	48	18	6	29	13	2	36	16	4	50	21	9	31	18	6	29	17	7	36	21	9	28	16	4	31	17	5	12	9	3	25.25	29.58
HSP71_HUMAN	P08107	Heat shock 70 kDa protein 1A/1B OS=Homo sapiens GN=HSPA1A PE=1 SV=5	0.32	0.24	0.779421	0.640157			5.22	0.76	0.001563	64	25	16	48	22	13	56	24	14	54	22	13	53	24	13	56	22	13	56	24	15	63	25	15	52	23	14	58	23	13	53	20	13	26	17	12	26.61	29.13
HSP72_HUMAN	P54652	Heat shock-related 70 kDa protein 2 OS=Homo sapiens GN=HSPA2 PE=1 SV=1	0.369999	-0.0666663	0.750418	0.890333			4.8	0.78	0.001407	33	12	3	27	9	1	38	12	3	29	10	1	34	12	1	31	11	2	34	12	3	35	14	4	35	12	2	30	9	1	32	11	2	19	9	0	26.39	29.05
HS902_HUMAN	Q14568	Putative heat shock protein HSP 90-alpha A2 OS=Homo sapiens GN=HSP90AA2 PE=1 SV=2	0.41	-0.41	0.76494	0.417256			4.5	0.8	0.004012	19	7	0	18	7	0	13	5	0	14	5	0	14	5	0	15	7	0	12	6	0	11	6	0	13	8	0	18	8	0	13	6	0	11	4	0	25.33	28.23
H90B2_HUMAN	Q58FF8	Putative heat shock protein HSP 90-beta 2 OS=Homo sapiens GN=HSP90AB2P PE=1 SV=2	0.383333	-0.403334	0.768943	0.40847			4.72	0.76	0.004012	20	8	1	20	9	1	19	8	1	19	7	1	17	8	1	17	8	1	18	8	0	22	10	2	27	11	2	24	9	0	28	10	1	15	7	1	25.44	28.25
HSP77_HUMAN	P48741	Putative heat shock 70 kDa protein 7 OS=Homo sapiens GN=HSPA7 PE=5 SV=2	0.266666	-0.236667	0.816985	0.586691			3.9	0.75	0.001563	12	3	0	10	3	0	11	3	0	13	3	0	16	3	0	9	3	0	15	3	0	11	3	0	11	3	0	14	3	0	14	3	0	8	3	0	26.27	28.8
PGAM1_HUMAN	P18669	Phosphoglycerate mutase 1 OS=Homo sapiens GN=PGAM1 PE=1 SV=2	0.553333	-1.98333	0.689606	0.0756918			4.71	0.78	0.001323	11	7	3	11	9	4	11	8	3	9	6	2	10	7	3	13	10	3	11	6	2	19	10	4	12	10	4	16	10	4	16	9	3	9	6	2	23.98	26.54
RS26_HUMAN	P62854	40S ribosomal protein S26 OS=Homo sapiens GN=RPS26 PE=1 SV=3	0.223333	-1.2	0.897741	0.102068			3.82	0.74	0.003841	9	3	1	21	4	1	17	3	1	9	2	0	9	2	0	23	4	1	5	2	0	7	3	1	8	3	1	8	2	0	6	2	0	4	3	1	24.9	28.86
COF1_HUMAN	P23528	Cofilin-1 OS=Homo sapiens GN=CFL1 PE=1 SV=3	0.67	-1.89333	0.717981	0.0966525			5.08	0.81	0.002521	4	3	2	11	7	4	6	3	2	2	1	0	3	2	1	11	5	3	2	1	0	5	2	1	6	3	2	5	3	2	6	4	2	4	4	2	23.39	27.48
RS25_HUMAN	P62851	40S ribosomal protein S25 OS=Homo sapiens GN=RPS25 PE=1 SV=1	0.426668	-1.52333	0.832045	0.0514155			3.34	0.63	0.013757	9	5	5	10	5	5	14	6	6	9	5	5	11	6	6	11	6	6	9	5	5	10	6	6	10	6	6	10	6	6	11	7	7	4	3	3	25.37	29.83
RS13_HUMAN	P62277	40S ribosomal protein S13 OS=Homo sapiens GN=RPS13 PE=1 SV=2	0.653334	-0.743334	0.711181	0.104422			4.33	0.68	0.005148	18	11	11	24	13	13	24	13	13	15	9	9	18	9	9	30	11	11	13	9	9	9	7	7	15	8	8	13	8	8	13	8	8	6	4	4	26.19	29.97
COF2_HUMAN	Q9Y281	Cofilin-2 OS=Homo sapiens GN=CFL2 PE=1 SV=1	0.306667	-1.89	0.843614	0.0925648			4.55	0.74	0.003274	2	1	0	7	5	2	2	1	0	3	2	1	3	2	1	6	4	2	2	1	0	3	1	0	2	1	0	2	1	0	3	2	0	3	3	1	23.24	26.35
PA2G4_HUMAN	Q9UQ80	Proliferation-associated protein 2G4 OS=Homo sapiens GN=PA2G4 PE=1 SV=3	0.246667	-0.65	0.852742	0.0848924			4.77	0.8	0.002418	18	11	11	21	17	17	18	13	13	19	13	13	21	14	14	19	14	14	28	18	18	28	20	20	25	16	16	19	13	13	26	17	17	17	14	14	24.5	27.83
IF5AL_HUMAN	Q6IS14	Eukaryotic translation initiation factor 5A-1-like OS=Homo sapiens GN=EIF5AL1 PE=1 SV=2	0.686666	-2.29667	0.77371	0.152589			3.18	0.73	0.007222	4	3	0	5	3	0	5	4	0	3	3	0	2	2	0	5	4	0	2	1	0	4	3	0	5	4	0	4	3	0	4	3	0	4	3	0	21.22	26.9
PGK1_HUMAN	P00558	Phosphoglycerate kinase 1 OS=Homo sapiens GN=PGK1 PE=1 SV=3	0.693334	-1.56333	0.61413	0.067117			4.73	0.78	0.009259	18	13	10	21	13	10	21	16	12	14	9	6	15	10	8	20	17	12	14	11	8	37	24	19	36	23	17	30	20	16	41	25	19	22	17	13	24.32	26.76
TAGL2_HUMAN	P37802	Transgelin-2 OS=Homo sapiens GN=TAGLN2 PE=1 SV=3	0.563333	-1.76333	0.713508	0.0725682			4.27	0.78	0.002744	16	13	13	19	14	11	15	11	10	11	9	9	13	10	10	14	11	10	11	7	6	17	13	12	13	11	10	17	13	13	17	14	13	9	9	9	24.06	27.12
ALDOA_HUMAN	P04075	Fructose-bisphosphate aldolase A OS=Homo sapiens GN=ALDOA PE=1 SV=2	0.833334	-0.986667	0.570005	0.131757			5.53	0.77	0.002716	29	13	12	26	12	11	23	15	14	19	11	10	15	10	10	19	12	12	20	11	10	31	19	18	39	19	18	24	14	13	38	17	16	20	12	12	25.08	27.42
IF2A_HUMAN	P05198	Eukaryotic translation initiation factor 2 subunit 1 OS=Homo sapiens GN=EIF2S1 PE=1 SV=3	0.113333	-0.79	0.93448	0.1346			6.19	0.83	0.003783	28	19	19	23	18	18	33	21	21	22	14	14	26	16	16	25	18	18	24	15	15	31	19	19	26	18	18	29	14	14	28	18	18	13	11	11	24.24	27.26
RL15_HUMAN	P61313	60S ribosomal protein L15 OS=Homo sapiens GN=RPL15 PE=1 SV=2	0.516666	-0.9	0.753485	0.110846			4.33	0.68	0.007916	17	7	7	17	7	7	20	7	7	21	7	7	20	7	7	18	7	7	22	8	8	21	8	8	29	9	9	23	8	8	21	8	8	10	6	6	24.83	28.38
RS23_HUMAN	P62266	40S ribosomal protein S23 OS=Homo sapiens GN=RPS23 PE=1 SV=3	0.953334	-1.56	0.647664	0.0750816			3.95	0.71	0.022155	7	3	3	9	4	4	10	5	5	3	3	3	3	3	3	12	5	5	4	3	3	6	5	5	6	5	5	5	3	3	7	5	5	3	3	3	23.45	27.72
LMNA_HUMAN	P02545	Prelamin-A/C OS=Homo sapiens GN=LMNA PE=1 SV=1	0.193333	-0.61	0.89962	0.294783			5.38	0.78	0.003301	49	28	28	55	37	37	52	35	35	40	27	27	56	34	34	60	41	40	69	33	32	67	36	35	68	37	36	80	39	38	64	32	32	37	24	24	25.02	28.22
ISG15_HUMAN	P05161	Ubiquitin-like protein ISG15 OS=Homo sapiens GN=ISG15 PE=1 SV=5	0.703334	-2.02	0.461255	0.0586943			3.83	0.65	0.0188	4	3	3	2	2	2	4	3	3	4	3	3	4	3	3	2	2	2	4	3	3	5	3	3	4	3	3	4	3	3	5	4	4	2	2	2	23.54	25.36
RL34_HUMAN	P49207	60S ribosomal protein L34 OS=Homo sapiens GN=RPL34 PE=1 SV=3	-0.283333	-1.02333	0.879239	0.0661289			2.13	0.5	0.012685	5	3	3	3	3	3	2	2	2	4	3	3	2	2	2	3	3	3	4	4	4	3	3	3	4	4	4	5	4	4	4	4	4	1	1	1	24.2	27.58
IF5A2_HUMAN	Q9GZV4	Eukaryotic translation initiation factor 5A-2 OS=Homo sapiens GN=EIF5A2 PE=1 SV=3	0.583334	-2.3	0.813977	0.139858			3.18	0.73	0.007222	3	2	0	5	3	0	4	3	0	2	2	0	2	2	0	4	3	0	2	1	0	3	2	0	4	3	0	3	2	0	4	3	0	3	2	0	20.75	26.9
TPIS_HUMAN	P60174	Triosephosphate isomerase OS=Homo sapiens GN=TPI1 PE=1 SV=3	0.573334	-1.87	0.669331	0.0909087			5.68	0.76	0.002258	15	9	9	11	8	8	16	12	12	11	10	10	12	10	10	14	10	10	9	6	6	18	13	13	14	11	11	19	12	12	18	12	12	7	6	6	23.82	26.03
RS4Y1_HUMAN	P22090	40S ribosomal protein S4, Y isoform 1 OS=Homo sapiens GN=RPS4Y1 PE=2 SV=2	0.0799999	-0.989999	0.964192	0.0787512			5.58	0.74	0.001948	15	6	0	17	6	0	22	9	0	19	9	0	21	9	0	25	9	0	15	8	0	14	7	0	16	8	0	15	9	0	15	8	0	8	5	0	24.49	28.5
RS26L_HUMAN	Q5JNZ5	Putative 40S ribosomal protein S26-like 1 OS=Homo sapiens GN=RPS26P11 PE=5 SV=1	0.15	-1.19	0.928848	0.0993886			3.71	0.69	0.003841	8	2	0	18	3	0	15	2	0	9	2	0	9	2	0	21	3	0	5	2	0	6	2	0	7	2	0	8	2	0	6	2	0	3	2	0	24.48	28.23
G6PI_HUMAN	P06744	Glucose-6-phosphate isomerase OS=Homo sapiens GN=GPI PE=1 SV=4	0.336667	-1.21333	0.789529	0.106528			6.71	0.78	0.017706	15	11	11	14	11	11	13	10	10	9	8	8	11	9	9	15	14	14	11	10	10	24	14	14	25	15	15	20	11	11	23	16	16	12	10	10	23.35	25.6
H90B3_HUMAN	Q58FF7	Putative heat shock protein HSP 90-beta-3 OS=Homo sapiens GN=HSP90AB3P PE=5 SV=1	0.376666	-0.54	0.774253	0.352426			5.17	0.73	0.00389	42	19	0	46	20	1	39	17	0	32	16	0	34	15	0	35	16	0	30	14	0	48	21	0	53	22	0	53	20	0	56	17	0	41	18	0	24.86	27.8
SKP1_HUMAN	P63208	S-phase kinase-associated protein 1 OS=Homo sapiens GN=SKP1 PE=1 SV=2	0.996666	-2.65667	0.216748	0.0910751			4.21	0.82	0.029578	10	7	7	4	3	3	9	6	6	6	3	3	6	6	6	2	2	2	4	4	4	6	6	6	7	6	6	6	4	4	6	6	6	4	3	3	23.03	25.05
RS29_HUMAN	P62273	40S ribosomal protein S29 OS=Homo sapiens GN=RPS29 PE=1 SV=2	0.58	-4.67	0.724972	0.232678			1.77	0.52	0.011276	2	1	1	4	2	2	3	1	1	2	1	1	1	1	1	2	1	1	1	1	1	2	1	1	1	1	1	2	1	1	2	1	1	1	1	1	24.21	27.86
TBB4A_HUMAN	P04350	Tubulin beta-4A chain OS=Homo sapiens GN=TUBB4A PE=1 SV=2	0.703334	-0.3	0.581518	0.495156			7.94	0.78	0.000305	44	15	0	56	19	0	50	18	0	34	16	0	39	17	0	43	18	0	39	15	0	53	19	0	57	19	0	43	14	0	53	20	0	29	14	0	26.52	29.42
RL8_HUMAN	P62917	60S ribosomal protein L8 OS=Homo sapiens GN=RPL8 PE=1 SV=2	0.466667	-0.530001	0.781285	0.239818			4.88	0.8	0.007289	11	7	7	10	6	6	11	7	7	9	6	6	12	6	6	15	11	11	13	8	8	19	10	10	17	8	8	15	9	9	18	10	10	5	4	4	24.98	28.2
HSP76_HUMAN	P17066	Heat shock 70 kDa protein 6 OS=Homo sapiens GN=HSPA6 PE=1 SV=2	0.29	-0.0666669	0.799639	0.883534			4.8	0.75	0.001563	21	6	0	16	5	0	18	5	0	20	6	0	24	7	0	16	6	0	22	6	0	20	6	0	19	6	0	19	5	0	21	6	0	12	6	0	25.76	28.28
RL18A_HUMAN	Q02543	60S ribosomal protein L18a OS=Homo sapiens GN=RPL18A PE=1 SV=2	0.356666	-0.926666	0.826443	0.111942			4.49	0.71	0.000347	10	6	6	17	10	10	14	7	7	13	7	7	10	5	5	18	10	10	12	6	6	14	8	8	17	9	9	15	8	8	19	9	9	6	4	4	24.88	28.47
RS5_HUMAN	P46782	40S ribosomal protein S5 OS=Homo sapiens GN=RPS5 PE=1 SV=4	0.0900002	-0.96	0.949021	0.0890104			4.43	0.72	0.00121	8	4	4	10	6	6	9	5	5	9	4	4	7	4	4	8	4	4	7	4	4	6	3	3	6	4	4	7	4	4	7	4	4	3	3	3	24.15	27.45
RL30_HUMAN	P62888	60S ribosomal protein L30 OS=Homo sapiens GN=RPL30 PE=1 SV=2	0.533332	-0.523334	0.7144	0.224148			4.31	0.66	0.006417	10	8	8	11	8	8	11	8	8	9	7	7	9	7	7	11	7	7	11	9	9	10	7	7	10	8	8	8	6	6	10	8	8	4	3	3	25.3	28.38
RL3_HUMAN	P39023	60S ribosomal protein L3 OS=Homo sapiens GN=RPL3 PE=1 SV=2	0.513333	-0.54	0.724682	0.172043			5.78	0.79	0.014614	11	7	7	15	9	9	18	8	8	10	6	6	7	5	5	12	8	8	10	7	7	12	7	7	17	11	10	12	6	6	15	10	10	6	5	5	24.14	27.36
RL7A_HUMAN	P62424	60S ribosomal protein L7a OS=Homo sapiens GN=RPL7A PE=1 SV=2	0.373334	-1.08	0.847271	0.0796561			4.41	0.77	0.001025	22	11	11	30	13	13	32	15	15	32	14	14	28	14	14	32	15	15	17	11	11	20	13	13	24	12	12	20	12	12	18	12	12	10	9	9	24.74	29.26
RS10_HUMAN	P46783	40S ribosomal protein S10 OS=Homo sapiens GN=RPS10 PE=1 SV=1	0.473333	-1.21333	0.828589	0.145609			5.31	0.75	0.010435	12	6	2	24	7	2	25	7	3	12	6	2	11	5	1	26	7	2	8	5	1	13	6	2	16	7	2	15	6	2	15	7	3	7	5	1	22.48	27.7
RL10L_HUMAN	Q96L21	60S ribosomal protein L10-like OS=Homo sapiens GN=RPL10L PE=1 SV=3	0.773333	-0.24	0.715996	0.413064			3.14	0.73	0.015665	8	4	0	14	7	0	11	4	0	7	2	0	8	4	0	12	5	0	10	4	0	9	5	0	12	6	0	10	5	0	12	5	0	3	2	0	24.05	28.3
PGAM2_HUMAN	P15259	Phosphoglycerate mutase 2 OS=Homo sapiens GN=PGAM2 PE=1 SV=3	0.393333	-1.88333	0.769205	0.0895315			3.56	0.73	0.063111	5	3	0	5	4	0	5	4	0	5	3	0	5	3	0	7	5	0	7	3	0	7	4	0	5	4	0	7	4	0	8	4	0	5	3	0	23.32	25.64
ANXA5_HUMAN	P08758	Annexin A5 OS=Homo sapiens GN=ANXA5 PE=1 SV=2	0.55	-1.86333	0.705223	0.128554			3.11	0.69	0.005362	12	9	9	14	12	12	12	11	11	11	9	9	14	11	11	13	11	11	7	7	7	17	11	11	15	12	12	14	10	10	16	12	12	10	8	8	22.85	25.83
RUXE_HUMAN	P62304	Small nuclear ribonucleoprotein E OS=Homo sapiens GN=SNRPE PE=1 SV=1	0.846666	-1.79333	0.647699	0.232416			3.18	0.74	0.036693	2	2	2	4	3	3	4	2	2	2	2	2	2	2	2	4	2	2	2	2	2	2	2	2	2	2	2	2	2	2	2	2	2	2	2	2	22.43	26.23
EF2_HUMAN	P13639	Elongation factor 2 OS=Homo sapiens GN=EEF2 PE=1 SV=4	0.486667	-0.62	0.768381	0.36839			5.52	0.76	0.003066	39	21	20	54	37	36	41	26	25	30	22	21	31	22	22	53	31	30	30	21	20	57	32	31	42	25	24	54	25	24	47	24	23	32	19	18	24.28	27.95
HS71L_HUMAN	P34931	Heat shock 70 kDa protein 1-like OS=Homo sapiens GN=HSPA1L PE=1 SV=2	0.34	-0.0399996	0.763259	0.928099			4.4	0.75	0.001563	33	10	1	24	9	0	26	9	0	30	9	0	29	11	0	29	10	1	26	9	0	27	9	0	27	9	0	26	11	2	25	7	0	11	6	1	25.55	28.11
RL13_HUMAN	P26373	60S ribosomal protein L13 OS=Homo sapiens GN=RPL13 PE=1 SV=4	0.753333	-0.836667	0.720818	0.126026			3.94	0.66	0.002888	20	9	9	18	12	12	22	12	12	17	10	10	20	9	9	24	10	10	14	8	8	17	10	10	17	9	9	20	12	12	19	9	9	7	5	5	24.59	29.09
TBB3_HUMAN	Q13509	Tubulin beta-3 chain OS=Homo sapiens GN=TUBB3 PE=1 SV=2	0.699999	-0.416667	0.563157	0.322361			5.15	0.8	0.000305	38	15	1	44	17	0	48	18	1	31	15	0	34	17	0	44	18	0	33	15	1	47	18	0	51	20	2	40	15	2	48	19	1	24	11	0	26.02	28.87
ANXA1_HUMAN	P04083	Annexin A1 OS=Homo sapiens GN=ANXA1 PE=1 SV=2	0.656666	-1.54	0.645653	0.0613431			6.05	0.8	0.000752	12	12	12	13	13	13	16	15	15	12	12	12	15	14	14	20	16	16	13	10	10	14	13	13	20	16	16	15	14	14	21	15	15	14	10	10	23.32	25.91
H2B1C_HUMAN	P62807	Histone H2B type 1-C/E/F/G/I OS=Homo sapiens GN=HIST1H2BC PE=1 SV=4	-0.493333	-3.80667	0.842298	0.0977462			4.11	0.72	0.006488	4	3	0	9	5	0	3	3	0	6	4	0	4	3	0	14	8	0	1	1	0	2	2	0	4	3	0	10	5	0	3	3	0	3	3	0	22.58	26.75
H2B1D_HUMAN	P58876	Histone H2B type 1-D OS=Homo sapiens GN=HIST1H2BD PE=1 SV=2	-0.493333	-3.80667	0.842298	0.0977462			4.11	0.72	0.006488	4	3	0	9	5	0	3	3	0	6	4	0	4	3	0	14	8	0	1	1	0	2	2	0	4	3	0	10	5	0	3	3	0	3	3	0	22.58	26.75
H2B1H_HUMAN	Q93079	Histone H2B type 1-H OS=Homo sapiens GN=HIST1H2BH PE=1 SV=3	-0.493333	-3.80667	0.842298	0.0977462			4.11	0.72	0.006488	4	3	0	9	5	0	3	3	0	6	4	0	4	3	0	14	8	0	1	1	0	2	2	0	4	3	0	10	5	0	3	3	0	3	3	0	22.58	26.75
H2B1L_HUMAN	Q99880	Histone H2B type 1-L OS=Homo sapiens GN=HIST1H2BL PE=1 SV=3	-0.493333	-3.80667	0.842298	0.0977462			4.11	0.72	0.006488	4	3	0	9	5	0	3	3	0	6	4	0	4	3	0	14	8	0	1	1	0	2	2	0	4	3	0	10	5	0	3	3	0	3	3	0	22.58	26.75
H2B1M_HUMAN	Q99879	Histone H2B type 1-M OS=Homo sapiens GN=HIST1H2BM PE=1 SV=3	-0.493333	-3.80667	0.842298	0.0977462			4.11	0.72	0.006488	4	3	0	9	5	0	3	3	0	6	4	0	4	3	0	14	8	0	1	1	0	2	2	0	4	3	0	10	5	0	3	3	0	3	3	0	22.58	26.75
H2B1N_HUMAN	Q99877	Histone H2B type 1-N OS=Homo sapiens GN=HIST1H2BN PE=1 SV=3	-0.493333	-3.80667	0.842298	0.0977462			4.11	0.72	0.006488	4	3	0	9	5	0	3	3	0	6	4	0	4	3	0	14	8	0	1	1	0	2	2	0	4	3	0	10	5	0	3	3	0	3	3	0	22.58	26.75
H2B2F_HUMAN	Q5QNW6	Histone H2B type 2-F OS=Homo sapiens GN=HIST2H2BF PE=1 SV=3	-0.493333	-3.80667	0.842298	0.0977462			4.11	0.72	0.006488	4	3	0	9	5	0	3	3	0	6	4	0	4	3	0	14	8	0	1	1	0	2	2	0	4	3	0	10	5	0	3	3	0	3	3	0	22.58	26.75
H2B1K_HUMAN	O60814	Histone H2B type 1-K OS=Homo sapiens GN=HIST1H2BK PE=1 SV=3	-0.49	-3.80667	0.84318	0.0977462			4.11	0.72	0.006488	4	3	0	9	5	0	3	3	0	6	4	0	4	3	0	12	7	0	1	1	0	2	2	0	4	3	0	10	5	0	3	3	0	3	3	0	22.58	26.75
H2BFS_HUMAN	P57053	Histone H2B type F-S OS=Homo sapiens GN=H2BFS PE=1 SV=2	-0.49	-3.80667	0.84318	0.0977462			4.11	0.72	0.006488	4	3	0	9	5	0	3	3	0	6	4	0	4	3	0	12	7	0	1	1	0	2	2	0	4	3	0	10	5	0	3	3	0	3	3	0	22.58	26.75
ASSY_HUMAN	P00966	Argininosuccinate synthase OS=Homo sapiens GN=ASS1 PE=1 SV=2	0.263333	-1.26	0.859091	0.129488			5.45	0.8	0.007904	14	11	11	19	15	15	9	8	8	10	9	9	17	12	12	24	17	17	11	9	9	27	15	15	33	18	18	28	13	13	31	17	17	13	9	9	23.64	26.87
RL26_HUMAN	P61254	60S ribosomal protein L26 OS=Homo sapiens GN=RPL26 PE=1 SV=1	0.223332	-0.52	0.885775	0.377877			3.49	0.77	0.004584	20	9	3	19	11	3	24	13	6	24	12	6	21	10	5	27	14	6	25	12	5	27	12	5	28	13	5	28	10	5	31	13	5	5	3	1	25.38	28.72
NUCL_HUMAN	P19338	Nucleolin OS=Homo sapiens GN=NCL PE=1 SV=3	0.413333	-0.0366662	0.75828	0.925231			5.19	0.82	0.009354	34	17	17	30	18	18	34	17	17	24	15	15	26	15	15	29	18	18	30	18	18	35	19	19	44	19	19	29	16	16	36	18	18	19	15	15	25.07	27.86
R13AX_HUMAN	Q6NVV1	Putative 60S ribosomal protein L13a-like MGC87657 OS=Homo sapiens PE=5 SV=1	0.356667	-0.73	0.843206	0.220385			3.29	0.69	0.01466	5	4	0	13	5	0	11	5	0	7	5	0	8	4	0	12	5	0	6	3	0	6	4	0	8	5	0	6	4	0	6	4	0	2	1	0	24.7	28.94
YI016_HUMAN	A6NKZ8	Putative tubulin beta chain-like protein ENSP00000290377 OS=Homo sapiens PE=5 SV=2	0.706668	-0.216667	0.530162	0.637287			4.21	0.77	0.007537	26	8	0	27	8	0	25	8	0	20	8	0	18	7	0	23	8	0	24	9	0	33	9	0	36	9	0	30	8	0	34	9	0	18	8	0	26.04	28.62
RLA2_HUMAN	P05387	60S acidic ribosomal protein P2 OS=Homo sapiens GN=RPLP2 PE=1 SV=1	0.846667	-1.88	0.732718	0.134008			6.55	0.79	0.009851	6	4	4	10	7	6	9	5	5	9	5	5	6	3	3	13	7	7	2	2	2	2	2	2	5	4	4	6	5	5	2	2	2	2	2	2	23.58	28.48
RL23_HUMAN	P62829	60S ribosomal protein L23 OS=Homo sapiens GN=RPL23 PE=1 SV=1	0.936666	-0.416668	0.622106	0.209892			5.38	0.77	0.002266	7	3	3	9	7	7	15	9	9	10	5	5	10	6	6	13	8	8	14	8	8	11	5	5	15	8	8	12	8	8	15	7	7	2	2	2	22.6	26.66
RS10L_HUMAN	Q9NQ39	Putative 40S ribosomal protein S10-like OS=Homo sapiens GN=RPS10P5 PE=5 SV=1	0.323333	-1.08667	0.874589	0.127939			5.31	0.75	0.010435	9	4	0	14	5	0	15	4	0	10	4	0	10	4	0	17	5	0	7	4	0	11	4	0	13	5	0	13	4	0	12	4	0	6	4	0	22.57	27.32
GRP78_HUMAN	P11021	78 kDa glucose-regulated protein OS=Homo sapiens GN=HSPA5 PE=1 SV=2	0.323334	0.15	0.797623	0.784582			5.3	0.81	0.001649	66	32	31	60	33	32	76	36	35	55	30	29	60	31	30	73	38	37	50	29	28	72	39	38	68	36	35	47	27	26	57	32	31	23	20	19	25.42	28.26
RS17_HUMAN	P08708	40S ribosomal protein S17 OS=Homo sapiens GN=RPS17 PE=1 SV=2	0.286667	-0.76	0.867113	0.0602197			4.19	0.75	0.002281	3	2	0	14	8	0	11	7	0	3	2	0	3	2	0	8	4	0	6	5	0	8	6	0	9	5	0	6	3	0	7	5	0	3	3	0	25.1	29.22
RS17L_HUMAN	P0CW22	40S ribosomal protein S17-like OS=Homo sapiens GN=RPS17L PE=3 SV=1	0.286667	-0.76	0.867113	0.0602197			4.19	0.75	0.002281	3	2	0	14	8	0	11	7	0	3	2	0	3	2	0	8	4	0	6	5	0	8	6	0	9	5	0	6	3	0	7	5	0	3	3	0	25.1	29.22
TBB8_HUMAN	Q3ZCM7	Tubulin beta-8 chain OS=Homo sapiens GN=TUBB8 PE=1 SV=2	0.673333	-0.293333	0.551334	0.496378			4.21	0.77	0.002707	30	9	0	30	10	0	28	10	0	22	9	0	20	8	0	26	10	0	27	10	0	38	11	0	40	11	0	33	9	0	38	11	0	20	9	0	25.78	28.34
IF4A2_HUMAN	Q14240	Eukaryotic initiation factor 4A-II OS=Homo sapiens GN=EIF4A2 PE=1 SV=2	0.273333	-1.05667	0.871438	0.0631564			5.32	0.77	0.000693	14	9	1	26	20	4	25	15	2	23	15	3	18	12	1	25	18	3	11	9	1	22	15	3	25	16	4	17	9	1	21	11	3	9	8	1	24.15	28.19
HMGB1_HUMAN	P09429	High mobility group protein B1 OS=Homo sapiens GN=HMGB1 PE=1 SV=3	0.53	-1.95	0.756231	0.0861449			4.66	0.72	0.00551	9	5	2	13	11	6	12	9	4	11	6	3	8	7	3	13	9	5	8	6	3	10	8	5	6	3	2	17	10	6	12	9	5	6	5	3	23.71	26.57
TAD2B_HUMAN	Q86TJ2	Transcriptional adapter 2-beta OS=Homo sapiens GN=TADA2B PE=1 SV=2	0.18	-0.61	0.874006	0.719701			2.07	0.5	0.016302	5	1	1	2	1	1	4	1	1	3	1	1	5	1	1	1	1	1	3	1	1	3	1	1	4	1	1	2	1	1	2	1	1	4	1	1	24.04	26.67
TBB8L_HUMAN	A6NNZ2	Tubulin beta-8 chain-like protein LOC260334 OS=Homo sapiens PE=1 SV=1	0.706668	-0.216667	0.530162	0.637287			4.21	0.77	0.007537	26	8	0	27	8	0	25	8	0	20	8	0	18	7	0	23	8	0	24	9	0	33	9	0	36	9	0	30	8	0	34	9	0	18	8	0	25.87	28.45
SRSF3_HUMAN	P84103	Serine/arginine-rich splicing factor 3 OS=Homo sapiens GN=SRSF3 PE=1 SV=1	0.693333	-0.756667	0.723248	0.211156			3.64	0.78	0.002701	9	6	5	12	7	6	14	6	5	9	6	5	8	5	4	14	8	7	9	7	7	11	9	8	13	9	8	10	7	6	13	9	8	2	2	1	23.45	27.62
SRSF6_HUMAN	Q13247	Serine/arginine-rich splicing factor 6 OS=Homo sapiens GN=SRSF6 PE=1 SV=2	0.313334	-0.79	0.811773	0.0682946			3.75	0.67	0.00522	7	5	4	7	5	3	6	6	4	6	5	3	4	3	1	7	6	3	14	9	6	14	8	6	15	8	5	14	9	7	14	7	5	6	6	4	23.25	26.09
SET_HUMAN	Q01105	Protein SET OS=Homo sapiens GN=SET PE=1 SV=3	0.47	-1.29667	0.741842	0.0518048			4.33	0.73	0.02368	7	4	4	8	6	6	8	6	6	6	3	3	6	4	4	7	6	6	9	4	4	9	5	5	10	6	6	8	6	6	13	8	8	4	3	3	23.38	26.57
NPM_HUMAN	P06748	Nucleophosmin OS=Homo sapiens GN=NPM1 PE=1 SV=2	0.58	-0.48	0.748025	0.550658			7.08	0.82	0.002555	13	8	8	27	15	15	25	10	10	10	7	7	12	8	8	18	9	9	6	5	5	18	10	10	14	8	8	10	6	6	12	8	8	7	6	6	25.55	29.99
HNRPU_HUMAN	Q00839	Heterogeneous nuclear ribonucleoprotein U OS=Homo sapiens GN=HNRNPU PE=1 SV=6	0.656666	0.0900002	0.580108	0.799306			5.37	0.8	0.000222	23	16	16	19	13	13	20	13	13	15	10	10	18	10	10	21	12	12	36	22	22	43	24	24	38	23	23	32	19	19	33	17	17	16	13	13	24.21	26.33
RS4Y2_HUMAN	Q8TD47	40S ribosomal protein S4, Y isoform 2 OS=Homo sapiens GN=RPS4Y2 PE=1 SV=3	0.173333	-0.94	0.92504	0.0829747			4.4	0.68	0.001632	16	6	0	16	6	0	24	10	0	17	8	0	20	9	0	25	9	0	16	9	0	11	7	0	17	10	0	14	9	0	16	9	0	6	4	0	23.66	27.71
SMD3_HUMAN	P62318	Small nuclear ribonucleoprotein Sm D3 OS=Homo sapiens GN=SNRPD3 PE=1 SV=1	0.603334	-1.64333	0.733135	0.0689461			2.7	0.46	0.009535	4	2	2	4	3	3	5	3	3	1	1	1	4	2	2	5	3	3	2	2	2	3	2	2	1	1	1	4	2	2	4	2	2	1	1	1	22.89	26.77
ALDR_HUMAN	P15121	Aldose reductase OS=Homo sapiens GN=AKR1B1 PE=1 SV=3	1.40667	-1.88333	0.350133	0.101411			2.89	0.63	0.013732	10	7	6	9	6	5	8	6	5	4	3	2	6	5	4	7	4	3	4	4	3	9	7	6	8	6	5	11	5	4	12	7	6	5	5	4	22.95	25.86
UBC_HUMAN	P0CG48	Polyubiquitin-C OS=Homo sapiens GN=UBC PE=1 SV=3	0.720001	-1.24667	0.61864	0.198196			4.33	0.73	0.000356	48	6	0	41	6	0	44	6	0	34	4	0	46	6	0	49	6	0	31	6	0	38	6	0	33	6	0	47	6	0	41	6	0	18	6	0	23.11	26.23
HSPB1_HUMAN	P04792	Heat shock protein beta-1 OS=Homo sapiens GN=HSPB1 PE=1 SV=2	0.566666	-1.21667	0.76153	0.185214			4.49	0.76	0.001766	18	11	11	19	11	11	19	12	12	14	10	10	33	13	13	22	12	12	22	12	12	19	11	11	13	10	10	17	11	11	17	12	12	5	5	5	23.2	27.15
THOC4_HUMAN	Q86V81	THO complex subunit 4 OS=Homo sapiens GN=ALYREF PE=1 SV=3	-0.453334	-1.18	0.668607	0.0721618			4.81	0.75	0.027298	4	2	2	5	4	4	4	2	2	3	2	2	4	2	2	5	4	4	3	2	2	5	3	3	5	3	3	4	2	2	5	3	3	3	2	2	22.97	23.52
PAIRB_HUMAN	Q8NC51	Plasminogen activator inhibitor 1 RNA-binding protein OS=Homo sapiens GN=SERBP1 PE=1 SV=2	0.223333	-0.613333	0.872443	0.109117			5.14	0.77	0.001862	24	16	16	29	17	17	25	16	16	25	17	17	22	14	14	28	19	19	32	19	19	32	21	21	34	20	20	29	17	17	43	22	22	15	12	12	23.97	27.29
MCA3_HUMAN	O43324	Eukaryotic translation elongation factor 1 epsilon-1 OS=Homo sapiens GN=EEF1E1 PE=1 SV=1	0.486666	-1.19	0.69409	0.0720745			3.17	0.62	0.008103	5	4	4	4	4	4	2	2	2	6	5	5	6	5	5	4	4	4	10	9	9	9	6	6	9	6	6	8	7	7	7	5	5	4	4	4	21.76	24.26
CMBL_HUMAN	Q96DG6	Carboxymethylenebutenolidase homolog OS=Homo sapiens GN=CMBL PE=1 SV=1	0.626666	-0.9	0.539461	0.220941			2.87	0.68	0.000284	5	5	5	6	6	6	4	4	4	4	4	4	3	3	3	3	3	3	5	5	5	5	5	5	5	5	5	4	4	4	6	6	6	4	4	4	22.98	24.89
TBB1_HUMAN	Q9H4B7	Tubulin beta-1 chain OS=Homo sapiens GN=TUBB1 PE=1 SV=1	1.02333	-0.656666	0.350494	0.114649			3.44	0.66	0.007537	20	6	0	19	6	0	19	6	0	16	7	0	13	6	0	18	6	0	19	7	0	28	7	0	30	7	0	27	7	0	28	7	0	16	7	0	24.5	27.12
CYC_HUMAN	P99999	Cytochrome c OS=Homo sapiens GN=CYCS PE=1 SV=2	2.55667	-3.54667	0.37101	0.0834622			3.38	0.68	0.049221	4	4	4	5	4	4	3	3	3	1	1	1	2	2	2	5	5	5	1	1	1	4	4	4	3	3	3	4	3	3	2	2	2	2	2	2	22.08	26.37
RL26L_HUMAN	Q9UNX3	60S ribosomal protein L26-like 1 OS=Homo sapiens GN=RPL26L1 PE=1 SV=1	0.360001	-0.580001	0.816264	0.417072			3.37	0.7	0.004584	15	8	2	14	9	1	16	9	2	15	8	2	13	6	1	17	9	1	19	11	4	22	11	4	22	12	4	18	9	4	23	11	3	3	2	0	24.95	28.36
PGAM4_HUMAN	Q8N0Y7	Probable phosphoglycerate mutase 4 OS=Homo sapiens GN=PGAM4 PE=1 SV=1	0.386667	-2.13	0.781513	0.0796917			3.63	0.73	0.018339	3	2	0	3	3	0	4	3	0	4	2	0	4	2	0	7	5	0	5	3	0	9	4	0	4	4	0	7	4	0	6	4	0	3	2	0	22.38	24.6
PARK7_HUMAN	Q99497	Protein DJ-1 OS=Homo sapiens GN=PARK7 PE=1 SV=2	1.04333	-1.56	0.381116	0.135062			3.3	0.73	0.006219	7	6	6	7	6	6	7	6	6	6	6	6	7	6	6	5	5	5	7	6	6	11	7	7	5	4	4	8	8	8	12	9	9	2	2	2	24.07	26.65
H90B4_HUMAN	Q58FF6	Putative heat shock protein HSP 90-beta 4 OS=Homo sapiens GN=HSP90AB4P PE=5 SV=1	0.523333	-0.46	0.677862	0.525877			5.17	0.73	0.01855	11	7	0	11	6	0	13	5	0	9	7	0	9	5	0	6	4	0	7	5	0	13	8	0	15	8	0	11	7	0	12	6	0	14	6	0	23.49	26.31
RL18_HUMAN	Q07020	60S ribosomal protein L18 OS=Homo sapiens GN=RPL18 PE=1 SV=2	0.29	-0.643333	0.892636	0.331916			4.07	0.71	0.002339	13	8	8	15	7	7	16	7	7	13	7	7	14	7	7	22	8	8	13	6	6	11	6	6	9	6	6	10	6	6	9	7	7	5	4	4	23.82	28.7
TBB6_HUMAN	Q9BUF5	Tubulin beta-6 chain OS=Homo sapiens GN=TUBB6 PE=1 SV=1	0.693333	-0.0899995	0.544595	0.850388			4.86	0.78	0.007537	32	15	4	35	14	3	37	17	6	27	15	4	27	13	3	32	15	3	30	13	1	38	16	4	42	17	4	35	14	2	41	17	4	18	9	0	25.8	28.41
ARF1_HUMAN	P84077	ADP-ribosylation factor 1 OS=Homo sapiens GN=ARF1 PE=1 SV=2	1.20333	-2.33333	0.63244	0.165405			3.57	0.7	0.007421	8	7	0	6	6	0	1	1	0	1	1	0	4	4	0	5	4	0	2	2	0	7	7	0	4	4	0	6	6	0	7	7	0	6	6	0	21.11	24.82
ARF3_HUMAN	P61204	ADP-ribosylation factor 3 OS=Homo sapiens GN=ARF3 PE=1 SV=2	1.20333	-2.33333	0.63244	0.165405			3.57	0.7	0.007421	8	7	0	6	6	0	1	1	0	1	1	0	4	4	0	5	4	0	2	2	0	7	7	0	4	4	0	6	6	0	7	7	0	6	6	0	21.11	24.82
GDIR1_HUMAN	P52565	Rho GDP-dissociation inhibitor 1 OS=Homo sapiens GN=ARHGDIA PE=1 SV=3	0.77	-2.28667	0.583353	0.0788023			4.37	0.76	0.002141	8	6	6	6	4	4	7	4	4	5	4	4	5	4	4	7	4	4	4	4	4	7	5	5	5	4	4	7	5	5	5	4	4	4	3	3	22.66	25.11
TKT_HUMAN	P29401	Transketolase OS=Homo sapiens GN=TKT PE=1 SV=3	0.500001	0.156666	0.708132	0.840916			5.73	0.77	0.00522	28	18	18	21	14	14	19	13	13	17	13	13	19	12	12	27	18	18	25	16	16	48	24	24	42	21	21	46	18	18	37	17	17	20	15	15	24.57	26.69
HS905_HUMAN	Q58FG0	Putative heat shock protein HSP 90-alpha A5 OS=Homo sapiens GN=HSP90AA5P PE=1 SV=1	0.353333	-0.39	0.827201	0.420261			4.94	0.79	0.012559	11	6	0	15	5	0	9	6	0	8	7	0	9	5	0	14	5	0	10	5	0	10	7	0	14	7	0	12	6	0	16	5	0	8	5	0	23.05	26.65
SERA_HUMAN	O43175	D-3-phosphoglycerate dehydrogenase OS=Homo sapiens GN=PHGDH PE=1 SV=4	0.606667	-0.956667	0.662399	0.106306			3.77	0.68	0.000383	6	6	6	6	6	6	3	3	3	3	3	3	3	3	3	5	5	5	7	7	7	8	5	5	9	6	6	8	7	7	7	5	5	5	5	5	22.18	24.8
DDX5_HUMAN	P17844	Probable ATP-dependent RNA helicase DDX5 OS=Homo sapiens GN=DDX5 PE=1 SV=1	0.526666	0.103333	0.647441	0.805979			4.44	0.78	0.000406	27	23	19	31	24	18	25	22	17	23	17	14	24	18	15	29	23	20	41	28	21	39	26	20	41	29	22	42	22	18	33	19	15	15	12	8	24.96	27.47
CH60_HUMAN	P10809	60 kDa heat shock protein, mitochondrial OS=Homo sapiens GN=HSPD1 PE=1 SV=2	2.43333	-0.406666	0.617754	0.590511			6.8	0.82	0.001723	3	3	3	162	54	54	30	19	19	3	3	3	8	7	7	54	32	32	14	11	11	34	19	19	62	26	26	24	17	17	26	16	16	14	9	9	19.34	31.02
CALR_HUMAN	P27797	Calreticulin OS=Homo sapiens GN=CALR PE=1 SV=1	1.09667	-1.62333	0.539585	0.0744922			5.31	0.77	0.00743	9	7	7	11	10	10	6	5	5	5	5	5	6	6	6	12	10	10	5	5	5	10	8	8	13	10	10	9	6	6	10	9	9	8	6	6	22.4	25.45
PGK2_HUMAN	P07205	Phosphoglycerate kinase 2 OS=Homo sapiens GN=PGK2 PE=1 SV=3	0.506667	-1.73667	0.731119	0.053447			4.61	0.76	0.070578	4	3	0	5	3	0	5	4	0	6	3	0	3	2	0	6	5	0	5	3	0	12	5	0	10	6	0	8	4	0	10	6	0	6	4	0	21.95	25.1
GSTM3_HUMAN	P21266	Glutathione S-transferase Mu 3 OS=Homo sapiens GN=GSTM3 PE=1 SV=3	0.59	-1.62667	0.648901	0.118569			3.65	0.67	0.005003	6	6	5	8	8	7	6	6	5	5	5	4	4	4	3	5	5	4	4	4	3	5	5	4	4	4	3	3	3	2	5	5	4	4	4	3	21.89	24.6
SFPQ_HUMAN	P23246	Splicing factor, proline- and glutamine-rich OS=Homo sapiens GN=SFPQ PE=1 SV=2	0.766666	-0.4	0.673053	0.648989			6.37	0.78	0.002103	24	14	13	53	29	28	37	19	18	15	9	8	21	13	12	42	22	21	14	10	9	11	9	8	15	11	10	11	8	7	10	8	7	9	8	7	25.16	28.98
NP1L1_HUMAN	P55209	Nucleosome assembly protein 1-like 1 OS=Homo sapiens GN=NAP1L1 PE=1 SV=1	0.63	-0.85	0.638925	0.0600045			5.02	0.71	0.005521	10	7	5	7	5	4	8	6	5	6	6	5	7	6	5	8	6	5	9	7	5	12	9	7	12	8	6	9	7	5	11	8	6	5	4	2	23.67	26.33
PRP19_HUMAN	Q9UMS4	Pre-mRNA-processing factor 19 OS=Homo sapiens GN=PRPF19 PE=1 SV=1	0.223334	-0.343334	0.862487	0.263144			6.53	0.77	0.007941	8	5	5	9	8	8	11	8	8	12	8	8	6	5	5	9	8	8	11	8	8	19	13	13	22	13	13	14	10	10	17	11	11	7	6	6	23.57	26.53
CYBP_HUMAN	Q9HB71	Calcyclin-binding protein OS=Homo sapiens GN=CACYBP PE=1 SV=2	1.03333	-2.17333	0.588772	0.0536893			6.22	0.73	0.004575	7	6	6	9	7	7	6	6	6	6	6	6	3	3	3	10	8	8	3	3	3	10	8	8	7	7	7	8	6	6	10	10	10	5	4	4	22.04	25.41
ENPL_HUMAN	P14625	Endoplasmin OS=Homo sapiens GN=HSP90B1 PE=1 SV=1	0.343334	-0.603333	0.80712	0.437982			5.85	0.78	0.000611	19	16	11	25	22	17	12	12	11	14	12	9	13	10	8	21	19	17	22	19	14	34	25	21	25	20	15	38	25	19	36	21	16	18	13	10	23.22	26.19
SRSF2_HUMAN	Q01130	Serine/arginine-rich splicing factor 2 OS=Homo sapiens GN=SRSF2 PE=1 SV=4	0.266666	-1.31	0.873027	0.103241			4.02	0.8	0.083418	3	3	1	4	3	1	3	2	1	4	3	1	2	2	0	4	2	1	3	3	1	6	4	2	5	3	1	4	3	1	5	4	2	2	2	0	22.75	26.41
CDK3_HUMAN	Q00526	Cyclin-dependent kinase 3 OS=Homo sapiens GN=CDK3 PE=1 SV=1	0.00666682	-1.11	0.995868	0.0761126			2.88	0.54	0.009716	3	1	0	3	2	0	2	1	0	4	2	0	3	2	0	4	2	0	5	2	0	5	2	0	4	1	0	4	1	0	5	2	0	3	2	0	22.36	25
FBRL_HUMAN	P22087	rRNA 2'-O-methyltransferase fibrillarin OS=Homo sapiens GN=FBL PE=1 SV=2	0.65	-1.23333	0.762042	0.0923509			5.02	0.75	0.008723	15	9	8	21	12	11	21	9	8	15	9	8	11	8	7	26	10	9	10	7	6	12	8	7	10	6	5	16	8	7	16	8	7	6	5	4	22.63	27.2
RL13A_HUMAN	P40429	60S ribosomal protein L13a OS=Homo sapiens GN=RPL13A PE=1 SV=2	0.41	-0.693333	0.818067	0.324969			3.58	0.69	0.002789	11	10	6	22	11	6	23	12	7	17	13	8	19	10	6	26	13	8	15	11	8	12	9	5	17	11	6	16	12	8	14	11	7	4	3	2	24.58	28.64
CPSF5_HUMAN	O43809	Cleavage and polyadenylation specificity factor subunit 5 OS=Homo sapiens GN=NUDT21 PE=1 SV=1	0.336667	-1.40667	0.82346	0.0684996			5.58	0.73	0.009813	7	6	6	13	11	11	13	12	12	8	7	7	7	6	6	11	8	8	6	6	6	9	8	8	9	8	8	8	7	7	9	7	7	4	4	4	22.82	26.29
H2B1B_HUMAN	P33778	Histone H2B type 1-B OS=Homo sapiens GN=HIST1H2BB PE=1 SV=2	-0.493333	-6.98622	0.873516	0.0551889			4.11	0.72	0.015926	3	2	0	7	5	0	3	3	0	5	4	0	2	2	0	12	8	0	0	0	0	0	0	0	2	2	0	8	4	0	2	2	0	2	2	0	20.54	25.67
H2B1O_HUMAN	P23527	Histone H2B type 1-O OS=Homo sapiens GN=HIST1H2BO PE=1 SV=3	-0.493333	-6.42386	0.873516	0.0549472			4.11	0.72	0.015926	3	2	0	7	5	0	3	3	0	5	4	0	2	2	0	12	8	0	0	0	0	0	0	0	2	2	0	8	4	0	2	2	0	2	2	0	20.54	25.67
H2B2E_HUMAN	Q16778	Histone H2B type 2-E OS=Homo sapiens GN=HIST2H2BE PE=1 SV=3	-0.493333	-7.28745	0.873516	0.0525812			4.11	0.72	0.015926	3	2	0	7	5	0	3	3	0	5	4	0	2	2	0	12	8	0	0	0	0	0	0	0	2	2	0	8	4	0	2	2	0	2	2	0	20.54	25.67
H2B3B_HUMAN	Q8N257	Histone H2B type 3-B OS=Homo sapiens GN=HIST3H2BB PE=1 SV=3	-0.493333	-6.38748	0.873516	0.0595047			4.11	0.72	0.015926	3	2	0	7	5	0	3	3	0	5	4	0	2	2	0	12	8	0	0	0	0	0	0	0	2	2	0	8	4	0	2	2	0	2	2	0	20.54	25.67
H2B1J_HUMAN	P06899	Histone H2B type 1-J OS=Homo sapiens GN=HIST1H2BJ PE=1 SV=3	-0.49	-6.42443	0.874256	0.0540975			4.11	0.72	0.015926	3	2	0	7	5	0	3	3	0	5	4	0	2	2	0	10	7	0	0	0	0	0	0	0	2	2	0	8	4	0	2	2	0	2	2	0	20.54	25.67
GBLP_HUMAN	P63244	Guanine nucleotide-binding protein subunit beta-2-like 1 OS=Homo sapiens GN=GNB2L1 PE=1 SV=3	0.376666	-1.64667	0.868968	0.0921778			4.83	0.81	0.000771	14	10	10	26	14	14	25	12	12	19	12	12	18	11	11	32	13	13	10	8	8	16	9	9	12	8	8	13	9	9	14	9	9	5	5	5	23.21	28.67
AINX_HUMAN	Q16352	Alpha-internexin OS=Homo sapiens GN=INA PE=1 SV=2	0.0233332	-2.94	0.985686	0.0910598			5.31	0.74	0.014604	16	13	11	13	10	7	16	14	11	16	11	8	15	12	9	23	14	11	1	1	0	1	1	0	3	2	0	4	4	1	6	5	2	1	1	0	24.74	27.79
RB11A_HUMAN	P62491	Ras-related protein Rab-11A OS=Homo sapiens GN=RAB11A PE=1 SV=3	0.583333	-1.86	0.815444	0.112536			4.02	0.69	0.006566	5	4	0	14	9	0	8	7	0	6	5	0	6	5	0	11	9	0	4	3	0	7	6	0	6	5	0	6	5	0	6	5	0	6	5	0	21.36	27.17
PSB5_HUMAN	P28074	Proteasome subunit beta type-5 OS=Homo sapiens GN=PSMB5 PE=1 SV=3	0.406666	-1.18	0.746508	0.068744			3.62	0.78	0.012806	12	9	9	11	8	8	11	9	9	9	7	7	11	8	8	14	9	9	9	7	7	14	11	11	11	8	8	11	10	10	13	10	10	4	4	4	22.74	25
KT3K_HUMAN	Q9HA64	Ketosamine-3-kinase OS=Homo sapiens GN=FN3KRP PE=1 SV=2	0.74	-1.69	0.175308	0.077602			4.3	0.78	0.011096	9	7	7	7	6	6	7	5	5	10	6	6	7	5	5	3	2	2	6	4	4	13	7	7	9	6	6	12	7	7	11	5	5	3	3	3	22.77	24.05
CBX5_HUMAN	P45973	Chromobox protein homolog 5 OS=Homo sapiens GN=CBX5 PE=1 SV=1	-0.300001	-1.18	0.875406	0.555483			4.61	0.67	0.010338	9	8	8	7	6	6	6	6	6	7	6	6	4	4	4	10	8	8	2	2	2	3	3	3	3	3	3	6	5	5	1	1	1	4	4	4	22.07	25.4
TPT1L_HUMAN	Q56UQ5	TPT1-like protein OS=Homo sapiens PE=1 SV=2	0.556667	-3.75888	0.795943	0.259307			3.46	0.61	0.034873	3	2	0	4	3	0	3	2	0	3	2	0	2	2	0	5	3	0	0	0	0	3	2	0	2	2	0	2	2	0	2	2	0	2	2	0	22.74	27.11
RS9_HUMAN	P46781	40S ribosomal protein S9 OS=Homo sapiens GN=RPS9 PE=1 SV=3	0.643333	-0.556666	0.788307	0.453031			3.33	0.66	0.005205	17	12	12	23	14	14	31	17	17	19	12	12	28	17	17	31	17	17	10	9	9	15	14	14	17	16	16	13	11	11	11	10	10	5	5	5	24.45	29.93
RB11B_HUMAN	Q15907	Ras-related protein Rab-11B OS=Homo sapiens GN=RAB11B PE=1 SV=4	0.636667	-1.86333	0.800176	0.112667			4.02	0.69	0.006566	5	4	0	15	10	1	9	8	1	6	5	0	6	5	0	11	9	0	4	3	0	7	6	0	6	5	0	6	5	0	6	5	0	6	5	0	21.27	27.15
FLNA_HUMAN	P21333	Filamin-A OS=Homo sapiens GN=FLNA PE=1 SV=4	0.0966663	-0.216667	0.957324	0.747791			5.48	0.79	0.000505	71	51	47	112	75	71	93	66	60	69	54	51	61	51	46	111	75	70	66	54	48	110	79	73	73	57	52	59	48	46	71	50	46	45	42	41	22.06	26.15
DDX17_HUMAN	Q92841	Probable ATP-dependent RNA helicase DDX17 OS=Homo sapiens GN=DDX17 PE=1 SV=2	0.586667	0.0633341	0.64698	0.871753			4.46	0.77	0.00168	21	17	13	31	24	18	29	22	17	19	15	12	22	16	13	26	18	15	35	19	12	27	18	12	33	23	16	20	12	8	23	14	10	12	10	6	24.36	27.4
NFL_HUMAN	P07196	Neurofilament light polypeptide OS=Homo sapiens GN=NEFL PE=1 SV=3	0.00666618	-4.0556	0.995947	0.167083			2.6	0.56	0.014604	5	2	0	6	3	0	5	3	0	8	3	0	5	3	0	10	3	0	1	1	0	0	0	0	2	1	0	3	3	0	4	3	0	1	1	0	24.42	27.52
PSA2_HUMAN	P25787	Proteasome subunit alpha type-2 OS=Homo sapiens GN=PSMA2 PE=1 SV=2	0.170001	-1.11	0.877183	0.202917			4.78	0.81	0.019001	4	3	3	6	6	6	6	6	6	4	3	3	5	4	4	5	5	5	4	4	4	8	6	6	8	7	7	6	5	5	6	5	5	4	4	4	21.92	24.19
G3PT_HUMAN	O14556	Glyceraldehyde-3-phosphate dehydrogenase, testis-specific OS=Homo sapiens GN=GAPDHS PE=1 SV=2	1.32667	0.927671	0.464288	0.764949			1.77	0.57	0.01305	3	2	0	1	1	0	1	1	0	2	1	0	2	1	0	1	1	0	1	1	0	3	2	0	5	2	0	2	1	0	0	0	0	1	1	0	21.87	25.19
SRSF8_HUMAN	Q9BRL6	Serine/arginine-rich splicing factor 8 OS=Homo sapiens GN=SRSF8 PE=1 SV=1	0.266666	-1.32667	0.8685	0.105684			2.35	0.42	0.083418	2	2	0	2	2	0	1	1	0	2	2	0	2	2	0	1	1	0	2	2	0	4	2	0	4	2	0	3	2	0	3	2	0	2	2	0	22.33	25.93
HGB1A_HUMAN	B2RPK0	Putative high mobility group protein B1-like 1 OS=Homo sapiens GN=HMGB1P1 PE=5 SV=1	0.446666	-1.5	0.787574	0.155346			4.02	0.65	0.00551	4	2	0	6	4	0	6	4	0	5	2	0	4	3	0	6	3	0	3	2	0	4	2	0	3	1	0	7	3	0	5	3	0	1	1	0	23.12	25.8
ROA0_HUMAN	Q13151	Heterogeneous nuclear ribonucleoprotein A0 OS=Homo sapiens GN=HNRNPA0 PE=1 SV=1	0.246667	-1.44667	0.907691	0.126244			4.61	0.73	0.007172	3	3	3	7	5	5	6	4	4	2	2	2	4	3	3	9	5	5	5	3	3	10	4	4	5	3	3	5	4	4	9	5	5	3	3	3	20.67	26.6
EF1D_HUMAN	P29692	Elongation factor 1-delta OS=Homo sapiens GN=EEF1D PE=1 SV=5	0.603333	-0.773334	0.743018	0.334874			5.81	0.77	0.001062	13	9	9	14	9	9	17	11	11	9	8	8	11	10	10	18	11	11	9	8	8	23	12	12	21	13	13	20	10	10	22	10	10	4	3	3	23.16	27.31
SPB6_HUMAN	P35237	Serpin B6 OS=Homo sapiens GN=SERPINB6 PE=1 SV=3	0.670001	-0.843334	0.392317	0.125099			4.88	0.76	0.002836	10	9	8	10	9	8	8	8	7	8	7	6	9	8	7	4	4	3	10	9	8	14	12	11	12	10	9	10	9	8	12	11	10	9	9	8	21.09	23.28
XRCC6_HUMAN	P12956	X-ray repair cross-complementing protein 6 OS=Homo sapiens GN=XRCC6 PE=1 SV=2	0.773333	0.683333	0.570618	0.135004			5.46	0.8	0.000315	27	20	20	29	25	25	28	23	23	20	17	17	16	15	15	25	23	23	44	21	21	32	20	20	42	25	25	21	15	15	24	18	17	10	9	9	23.71	26.43
PSA7L_HUMAN	Q8TAA3	Proteasome subunit alpha type-7-like OS=Homo sapiens GN=PSMA8 PE=1 SV=3	0.686667	-1.67	0.678731	0.061761			4.52	0.72	0.005737	4	3	0	6	5	0	4	3	0	3	3	0	3	3	0	6	5	0	2	2	0	5	3	0	4	3	0	4	3	0	5	3	0	3	3	0	21.61	24.98
PDIP2_HUMAN	Q9Y2S7	Polymerase delta-interacting protein 2 OS=Homo sapiens GN=POLDIP2 PE=1 SV=1	1.32667	0.533333	0.66109	0.386833			4.97	0.81	0.000771	2	2	2	17	14	14	6	6	6	2	2	2	6	6	6	7	7	7	48	17	17	51	20	20	51	20	20	27	16	16	37	20	20	9	8	8	17.48	25.85
FAS_HUMAN	P49327	Fatty acid synthase OS=Homo sapiens GN=FASN PE=1 SV=3	0.243334	-0.25	0.879088	0.719394			6.32	0.79	0.001282	47	39	39	84	61	61	70	49	49	48	38	38	50	40	40	77	58	58	43	38	38	75	55	55	49	43	43	44	40	40	46	36	36	39	38	38	21.94	25.66
RS6_HUMAN	P62753	40S ribosomal protein S6 OS=Homo sapiens GN=RPS6 PE=1 SV=1	0.333333	-0.74	0.868357	0.280417			5.39	0.76	0.002039	11	8	8	13	8	8	23	11	11	14	8	8	15	9	9	24	14	14	9	6	6	8	6	6	9	7	7	7	5	5	5	4	4	2	2	2	23.86	28.39
CDK5_HUMAN	Q00535	Cyclin-dependent kinase 5 OS=Homo sapiens GN=CDK5 PE=1 SV=3	0.323334	-1.03333	0.77721	0.0567595			2.29	0.54	0.009716	3	1	0	2	1	0	3	2	1	3	1	0	2	1	0	3	1	0	5	2	1	5	2	1	5	2	1	7	4	3	7	4	3	2	1	0	22.58	24.6
SRSF4_HUMAN	Q08170	Serine/arginine-rich splicing factor 4 OS=Homo sapiens GN=SRSF4 PE=1 SV=2	0.123334	-0.71	0.926539	0.0547698			3.12	0.65	0.00522	2	1	0	3	2	0	2	2	0	3	2	0	3	2	0	4	3	0	6	3	0	5	2	0	6	3	0	5	2	0	5	2	0	2	2	0	22.28	25.15
PCBP2_HUMAN	Q15366	Poly(rC)-binding protein 2 OS=Homo sapiens GN=PCBP2 PE=1 SV=1	0.343333	-1.21	0.851019	0.060493			4.93	0.75	0.006353	6	4	3	6	5	4	4	2	2	5	3	2	3	2	2	8	4	2	8	3	2	9	5	3	10	5	2	7	4	2	7	4	2	9	5	3	21.32	25.1
RAB1B_HUMAN	Q9H0U4	Ras-related protein Rab-1B OS=Homo sapiens GN=RAB1B PE=1 SV=1	0.25	-1.71667	0.92141	0.0772113			5.27	0.78	0.007165	6	5	1	16	11	4	11	6	1	4	4	1	4	4	1	11	9	2	4	3	1	4	3	1	3	3	1	4	4	1	4	4	1	3	3	1	21.36	26.81
RS2_HUMAN	P15880	40S ribosomal protein S2 OS=Homo sapiens GN=RPS2 PE=1 SV=2	0.34	-1.2	0.883627	0.0971472			4.33	0.76	0.004214	10	6	6	17	9	9	16	6	6	16	6	6	13	7	7	16	8	8	6	4	4	6	5	5	8	5	5	9	6	6	9	6	6	3	3	3	22.98	28.63
RUVB2_HUMAN	Q9Y230	RuvB-like 2 OS=Homo sapiens GN=RUVBL2 PE=1 SV=3	-0.0433337	-0.746666	0.965228	0.090206			4.35	0.75	0.001402	12	11	11	6	6	6	14	14	14	12	11	11	13	11	11	12	12	12	18	15	15	22	18	18	20	14	14	21	15	15	22	17	17	11	11	11	22.51	24.48
CDK4_HUMAN	P11802	Cyclin-dependent kinase 4 OS=Homo sapiens GN=CDK4 PE=1 SV=2	0.286666	-1.01667	0.803183	0.0620969			2.91	0.54	0.001568	6	4	3	3	2	1	5	4	3	5	2	1	5	4	3	7	5	4	4	1	0	7	4	3	6	2	1	7	3	2	7	3	2	2	1	0	22.57	24.55
DBPA_HUMAN	P16989	DNA-binding protein A OS=Homo sapiens GN=CSDA PE=1 SV=4	0.34	-1.26667	0.779676	0.0576091			5.55	0.81	0.019799	7	5	1	10	7	3	10	5	2	6	4	0	9	7	3	6	4	1	8	8	3	5	5	0	7	5	0	6	6	2	3	3	0	5	4	0	22.67	25.03
COTL1_HUMAN	Q14019	Coactosin-like protein OS=Homo sapiens GN=COTL1 PE=1 SV=3	1.63333	-1.95667	0.267273	0.140591			2.16	0.46	0.000236	5	5	5	3	3	3	2	2	2	1	1	1	1	1	1	2	2	2	1	1	1	4	4	4	2	2	2	3	3	3	3	3	3	2	2	2	21.81	23.75
ELAV1_HUMAN	Q15717	ELAV-like protein 1 OS=Homo sapiens GN=ELAVL1 PE=1 SV=2	-0.183333	-0.926667	0.869033	0.176689			5.18	0.71	0.026123	11	10	9	8	7	6	11	10	9	13	10	9	12	10	9	13	10	9	7	7	6	18	11	10	8	8	8	8	5	5	14	9	9	3	3	3	22.9	24.91
PDCD6_HUMAN	O75340	Programmed cell death protein 6 OS=Homo sapiens GN=PDCD6 PE=1 SV=1	0.75	-0.96	0.596581	0.27831			3.55	0.69	0.009132	8	5	5	6	5	5	7	5	5	7	4	4	5	3	3	6	4	4	7	5	5	9	5	5	7	4	4	8	4	4	7	3	3	3	2	2	21.97	24.97
6PGD_HUMAN	P52209	6-phosphogluconate dehydrogenase, decarboxylating OS=Homo sapiens GN=PGD PE=1 SV=3	0.963333	-1.44333	0.507492	0.0505992			3.61	0.76	0.025996	5	5	5	4	4	4	4	4	4	4	4	4	3	3	3	4	3	3	6	6	6	9	9	9	9	9	9	9	8	8	11	8	8	7	6	6	20.89	23.41
EFHD2_HUMAN	Q96C19	EF-hand domain-containing protein D2 OS=Homo sapiens GN=EFHD2 PE=1 SV=1	0.42	-1.06333	0.781518	0.14291			3.76	0.75	0.002199	11	10	8	6	6	6	10	9	7	7	7	6	11	11	9	13	11	10	7	6	5	12	10	9	13	11	9	9	9	7	13	13	11	3	3	2	22.53	24.52
CBX3_HUMAN	Q13185	Chromobox protein homolog 3 OS=Homo sapiens GN=CBX3 PE=1 SV=4	-0.126667	-0.303334	0.939597	0.620522			4.66	0.72	0.003726	6	5	4	6	5	3	6	5	4	4	3	3	6	5	4	8	7	4	5	4	4	6	5	4	7	5	4	5	5	4	7	5	4	2	2	2	21.38	25.29
BZW1_HUMAN	Q7L1Q6	Basic leucine zipper and W2 domain-containing protein 1 OS=Homo sapiens GN=BZW1 PE=1 SV=1	0.329999	-1.54	0.867369	0.0886477			3.33	0.66	0.0027	4	4	3	8	8	6	5	5	4	5	5	4	5	5	4	8	7	6	4	4	2	8	8	7	8	8	7	9	9	8	7	7	6	7	7	6	20.39	25.38
DHX9_HUMAN	Q08211	ATP-dependent RNA helicase A OS=Homo sapiens GN=DHX9 PE=1 SV=4	0.35	0.223333	0.833531	0.494669			5.26	0.79	0.002291	55	25	25	39	31	31	51	30	30	40	25	25	43	28	28	66	36	36	37	23	23	45	27	27	54	30	30	36	22	22	43	26	26	21	19	19	23.13	26.52
TCTP_HUMAN	P13693	Translationally-controlled tumor protein OS=Homo sapiens GN=TPT1 PE=1 SV=1	0.693333	-3.02281	0.754329	0.281569			3.72	0.72	0.014102	6	4	2	10	7	4	8	5	3	4	3	1	2	2	0	11	6	3	0	0	0	5	4	2	4	4	2	3	3	1	3	3	1	2	2	0	22.55	26.99
NP1L4_HUMAN	Q99733	Nucleosome assembly protein 1-like 4 OS=Homo sapiens GN=NAP1L4 PE=1 SV=1	0.709999	-0.866667	0.617436	0.0720622			2.82	0.66	0.005521	5	4	2	4	3	2	4	3	2	1	1	0	3	2	1	3	2	1	5	4	2	6	4	2	7	5	3	8	6	4	6	4	2	3	2	0	22.14	25.16
RAB1A_HUMAN	P62820	Ras-related protein Rab-1A OS=Homo sapiens GN=RAB1A PE=1 SV=3	0.193333	-1.81333	0.939389	0.0630306			5.37	0.75	0.019932	4	3	0	14	8	3	10	5	1	4	4	1	2	2	0	12	8	2	3	2	0	2	2	1	2	2	0	3	3	1	2	2	0	2	2	0	21.12	26.56
CDK6_HUMAN	Q00534	Cyclin-dependent kinase 6 OS=Homo sapiens GN=CDK6 PE=1 SV=1	0.316666	-0.993333	0.782766	0.0642464			2.29	0.54	0.009716	3	1	0	2	1	0	3	2	1	3	1	0	2	1	0	4	2	1	4	1	0	5	2	1	4	1	0	4	1	0	4	1	0	2	1	0	22.36	24.39
MYH9_HUMAN	P35579	Myosin-9 OS=Homo sapiens GN=MYH9 PE=1 SV=4	0.176666	-0.47	0.92602	0.452221			7.39	0.82	0.001486	92	64	57	147	93	82	115	76	68	79	60	53	89	65	58	148	97	81	61	46	39	97	76	64	70	53	46	71	53	45	81	58	49	38	33	27	22.41	26.63
UBE2N_HUMAN	P61088	Ubiquitin-conjugating enzyme E2 N OS=Homo sapiens GN=UBE2N PE=1 SV=1	0.36	-1.94	0.799673	0.077307			3.97	0.62	0.01773	2	2	0	2	2	1	2	2	0	2	2	0	3	2	0	2	2	0	2	2	0	3	3	0	2	2	0	3	3	0	4	4	1	2	2	0	21.4	23.25
CDK15_HUMAN	Q96Q40	Cyclin-dependent kinase 15 OS=Homo sapiens GN=CDK15 PE=2 SV=2	0.316666	-1.00333	0.782313	0.060695			2.29	0.54	0.009716	3	1	0	2	1	0	2	1	0	3	1	0	2	1	0	3	1	0	4	1	0	4	1	0	4	1	0	4	1	0	4	1	0	2	1	0	22.3	24.32
EF1B_HUMAN	P24534	Elongation factor 1-beta OS=Homo sapiens GN=EEF1B2 PE=1 SV=3	0.523334	-1.09667	0.775455	0.072714			4.41	0.81	0.006166	7	4	4	6	5	5	8	4	4	5	4	4	7	5	5	10	6	6	4	3	3	4	4	4	5	4	4	4	4	4	6	4	4	2	2	2	23.14	27.2
NFH_HUMAN	P12036	Neurofilament heavy polypeptide OS=Homo sapiens GN=NEFH PE=1 SV=4	0.0433337	-3.84938	0.973339	0.159991			2.6	0.54	0.014604	2	1	0	3	1	0	3	2	0	4	1	0	2	1	0	4	1	0	1	1	0	0	0	0	2	1	0	1	1	0	2	1	0	1	1	0	23.94	27.06
RALY_HUMAN	Q9UKM9	RNA-binding protein Raly OS=Homo sapiens GN=RALY PE=1 SV=1	0.463333	-0.74	0.743996	0.26061			4.28	0.76	0.000329	6	6	6	4	4	4	4	4	4	4	3	3	4	4	4	3	3	3	12	9	9	9	9	9	9	8	8	8	8	8	8	7	7	6	4	4	21.4	24.21
ARF5_HUMAN	P84085	ADP-ribosylation factor 5 OS=Homo sapiens GN=ARF5 PE=1 SV=2	1.40844	-4.17156	0.676355	0.125016			3.57	0.66	0.080413	1	1	0	3	3	0	0	0	0	0	0	0	1	1	0	3	3	1	0	0	0	2	2	0	1	1	0	2	2	0	2	2	0	3	3	0	17.26	24.21
ASB7_HUMAN	Q9H672	Ankyrin repeat and SOCS box protein 7 OS=Homo sapiens GN=ASB7 PE=1 SV=2	0.611156	-4.89862	0.594015	0.170316			1.37	0.38	0.218525	0	0	0	1	1	1	0	0	0	0	0	0	0	0	0	0	0	0	0	0	0	0	0	0	0	0	0	1	1	1	0	0	0	2	1	1	16.2868	18.56
UE2NL_HUMAN	Q5JXB2	Putative ubiquitin-conjugating enzyme E2 N-like OS=Homo sapiens GN=UBE2NL PE=1 SV=1	0.183334	-1.91	0.89245	0.0839428			3.05	0.62	0.01773	2	2	0	1	1	0	2	2	0	2	2	0	3	2	0	2	2	0	2	2	0	3	3	0	2	2	0	3	3	0	3	3	0	2	2	0	21.27	22.59
NFM_HUMAN	P07197	Neurofilament medium polypeptide OS=Homo sapiens GN=NEFM PE=1 SV=3	0.00666682	-2.91667	0.995947	0.0931167			2.91	0.56	0.014604	5	2	0	6	3	0	5	3	0	8	3	0	5	3	0	10	3	0	1	1	0	1	1	0	3	2	0	3	3	0	4	3	0	1	1	0	23.86	26.96
CSRP1_HUMAN	P21291	Cysteine and glycine-rich protein 1 OS=Homo sapiens GN=CSRP1 PE=1 SV=3	0.883333	-2.23	0.619044	0.149476			4.35	0.75	0.030393	6	5	5	5	4	4	4	4	4	3	3	3	3	3	3	6	6	6	1	1	1	5	4	4	5	3	3	6	5	5	6	4	4	2	2	2	21.89	25.18
TPR_HUMAN	P12270	Nucleoprotein TPR OS=Homo sapiens GN=TPR PE=1 SV=3	0.136666	-0.32	0.907502	0.76936			4.47	0.74	0.005685	32	32	32	42	39	39	46	45	45	33	31	31	36	35	35	42	40	40	38	36	36	47	39	39	47	42	42	22	21	21	33	33	33	12	11	11	19.82	22.59
YBOX2_HUMAN	Q9Y2T7	Y-box-binding protein 2 OS=Homo sapiens GN=YBX2 PE=1 SV=2	0.123334	-1.06667	0.918034	0.103267			5.55	0.81	0.019799	4	3	0	4	2	0	5	2	0	4	3	0	4	3	0	3	2	0	4	4	0	3	3	0	5	4	0	2	2	0	2	2	0	4	3	0	22.15	24.28
CLIC1_HUMAN	O00299	Chloride intracellular channel protein 1 OS=Homo sapiens GN=CLIC1 PE=1 SV=4	1.31	-2.23	0.455626	0.0943942			3.64	0.63	0.025876	2	2	2	4	4	4	3	3	3	2	2	2	4	3	3	3	3	3	2	2	2	4	3	3	2	2	2	3	3	3	3	3	3	2	2	2	20.82	24.41
CLH1_HUMAN	Q00610	Clathrin heavy chain 1 OS=Homo sapiens GN=CLTC PE=1 SV=5	-0.383333	-0.22	0.824314	0.539259			5.43	0.81	0.00071	41	32	24	68	46	34	45	34	26	39	32	25	50	45	35	61	48	35	45	34	23	43	36	28	52	42	31	41	32	23	43	36	26	23	23	17	21.58	25.62
LAP2A_HUMAN	P42166	Lamina-associated polypeptide 2, isoform alpha OS=Homo sapiens GN=TMPO PE=1 SV=2	-0.103333	-2.22333	0.959654	0.158086			5.54	0.77	0.00272	10	8	5	22	15	7	19	11	6	15	12	7	11	9	6	29	19	11	6	5	4	3	3	2	5	4	3	16	12	6	6	5	4	8	7	6	22.14	26.87
U5S1_HUMAN	Q15029	116 kDa U5 small nuclear ribonucleoprotein component OS=Homo sapiens GN=EFTUD2 PE=1 SV=1	0.993334	-0.0866667	0.529517	0.856537			4.39	0.75	0.010232	16	16	15	9	9	8	17	16	15	9	9	8	7	7	7	14	13	12	25	22	21	21	17	16	22	19	18	16	12	11	17	15	14	12	10	9	22.54	24.45
PEBP1_HUMAN	P30086	Phosphatidylethanolamine-binding protein 1 OS=Homo sapiens GN=PEBP1 PE=1 SV=3	0.706666	-1.39667	0.529623	0.137219			4.31	0.85	0.00733	7	5	5	6	6	6	9	6	6	6	6	6	5	5	5	6	6	6	3	3	3	7	7	7	4	4	4	5	5	5	4	4	4	1	1	1	22.25	24.32
STRAP_HUMAN	Q9Y3F4	Serine-threonine kinase receptor-associated protein OS=Homo sapiens GN=STRAP PE=1 SV=1	0.61	-1.16667	0.676047	0.05565			3.6	0.79	0.002218	8	7	7	14	10	10	16	13	13	10	8	8	12	10	10	7	6	6	4	4	4	13	12	12	11	9	9	10	9	9	11	9	9	5	5	5	21.12	24.93
AK1BF_HUMAN	C9JRZ8	Aldo-keto reductase family 1 member B15 OS=Homo sapiens GN=AKR1B15 PE=2 SV=1	0.74	-1.45333	0.5427	0.132806			2.31	0.36	0.013732	2	1	0	1	1	0	1	1	0	1	1	0	1	1	0	1	1	0	1	1	0	1	1	0	1	1	0	2	1	0	1	1	0	1	1	0	21.11	23.46
ILF2_HUMAN	Q12905	Interleukin enhancer-binding factor 2 OS=Homo sapiens GN=ILF2 PE=1 SV=2	0.183333	-0.396667	0.885071	0.419556			4.85	0.76	0.003541	14	10	10	11	7	7	16	9	9	16	11	11	11	9	9	12	9	9	14	7	7	19	10	10	19	11	11	13	10	10	18	11	11	6	5	5	23.37	26.4
PDIA6_HUMAN	Q15084	Protein disulfide-isomerase A6 OS=Homo sapiens GN=PDIA6 PE=1 SV=1	0.476667	-1.43333	0.750294	0.0942084			4.84	0.79	0.004987	9	7	7	9	7	7	8	6	6	6	6	6	8	7	7	8	7	7	6	6	6	13	11	11	11	10	10	11	10	10	14	12	12	9	8	8	21.66	24.81
RANG_HUMAN	P43487	Ran-specific GTPase-activating protein OS=Homo sapiens GN=RANBP1 PE=1 SV=1	0.656666	-2.84144	0.716347	0.329509			2.86	0.7	0.142309	2	2	2	3	3	3	3	3	3	3	3	3	3	3	3	4	3	3	0	0	0	5	5	5	4	4	4	2	2	2	2	2	2	2	2	2	20.65	24.28
LEG3_HUMAN	P17931	Galectin-3 OS=Homo sapiens GN=LGALS3 PE=1 SV=5	0.87	-1.96333	0.738161	0.0705078			4.25	0.65	0.013473	6	6	6	11	8	8	6	5	5	4	4	4	6	5	5	9	7	7	2	2	2	5	4	4	4	4	4	6	6	6	5	5	5	2	2	2	21.58	27.32
ANM1_HUMAN	Q99873	Protein arginine N-methyltransferase 1 OS=Homo sapiens GN=PRMT1 PE=1 SV=2	0.0333328	-0.803333	0.979841	0.0722105			4.63	0.7	0.029449	5	5	4	5	5	3	6	6	4	6	5	4	7	6	4	7	7	5	6	6	5	8	7	5	10	9	6	6	6	5	10	8	6	6	6	4	21.35	23.74
FKBP4_HUMAN	Q02790	Peptidyl-prolyl cis-trans isomerase FKBP4 OS=Homo sapiens GN=FKBP4 PE=1 SV=3	0.366666	-1.53333	0.841202	0.0873461			4.06	0.74	0.001991	5	5	5	6	5	5	4	4	4	3	3	3	5	4	4	6	6	6	8	6	6	18	15	14	15	12	12	19	14	14	13	11	11	6	5	5	19.36	23.47
RS24_HUMAN	P62847	40S ribosomal protein S24 OS=Homo sapiens GN=RPS24 PE=1 SV=1	0.336667	-0.73	0.872073	0.0918924			4.93	0.77	0.023625	6	4	4	11	7	7	10	6	6	5	3	3	5	3	3	12	6	6	2	2	2	3	3	3	4	3	3	3	2	2	2	2	2	2	2	2	22.35	27.4
CDK18_HUMAN	Q07002	Cyclin-dependent kinase 18 OS=Homo sapiens GN=CDK18 PE=1 SV=3	0.376666	-0.936666	0.73816	0.0679616			2.44	0.54	0.009716	4	2	0	2	1	0	3	2	0	3	1	0	2	1	0	3	1	0	6	3	0	4	1	0	5	2	0	4	1	0	4	1	0	2	1	0	22.1	23.99
RAB13_HUMAN	P51153	Ras-related protein Rab-13 OS=Homo sapiens GN=RAB13 PE=1 SV=1	-0.26	-1.63333	0.917728	0.115734			3.53	0.71	0.07803	3	2	0	6	5	3	4	2	0	2	2	0	2	2	0	6	5	3	2	2	0	2	2	0	2	2	0	2	2	0	2	2	0	1	1	0	20.71	25.61
CDK14_HUMAN	O94921	Cyclin-dependent kinase 14 OS=Homo sapiens GN=CDK14 PE=1 SV=3	0.316666	-1.00333	0.781946	0.0602658	O94921		2.29	0.54	0.009716	3	1	0	2	1	0	2	1	0	3	1	0	2	1	0	3	1	0	4	1	0	4	1	0	4	1	0	4	1	0	4	1	0	2	1	0	21.97	23.99
SMD2_HUMAN	P62316	Small nuclear ribonucleoprotein Sm D2 OS=Homo sapiens GN=SNRPD2 PE=1 SV=1	0.956666	-1.36333	0.624071	0.220008			4.71	0.79	0.002736	7	6	6	7	5	5	10	7	7	4	3	3	7	5	5	6	5	5	4	3	3	5	5	5	4	3	3	5	5	5	7	5	5	1	1	1	21.62	25.77
MOES_HUMAN	P26038	Moesin OS=Homo sapiens GN=MSN PE=1 SV=3	-0.0366669	-0.266667	0.982242	0.690662			5.33	0.76	0.003708	17	16	12	32	27	18	24	22	15	22	20	15	22	19	14	38	28	20	21	18	14	31	28	19	37	28	19	27	25	18	26	23	17	11	11	7	22.71	26.63
H2B2D_HUMAN	Q6DRA6	Putative histone H2B type 2-D OS=Homo sapiens GN=HIST2H2BD PE=5 SV=3	-0.0379645	-6.07705	0.991415	0.0656698			3.14	0.64	0.015926	1	1	0	2	2	0	2	2	0	3	2	0	0	0	0	5	3	0	0	0	0	0	0	0	1	1	0	3	2	0	1	1	0	1	1	0	19.46	23.59
SRSF7_HUMAN	Q16629	Serine/arginine-rich splicing factor 7 OS=Homo sapiens GN=SRSF7 PE=1 SV=1	0.753333	-1.69333	0.704261	0.110751			3.64	0.78	0.002701	8	6	5	12	7	6	13	8	7	7	6	5	6	5	4	12	8	7	2	2	2	10	7	6	7	6	5	7	5	4	9	6	5	2	2	1	22.65	26.66
ML12A_HUMAN	P19105	Myosin regulatory light chain 12A OS=Homo sapiens GN=MYL12A PE=1 SV=2	0.293333	-1.89	0.893381	0.0614697			5.45	0.74	0.023749	9	8	0	13	11	0	9	9	0	8	7	0	11	9	0	18	12	0	3	3	0	2	2	0	3	3	0	4	3	0	4	4	0	2	2	0	22.19	26.97
ML12B_HUMAN	O14950	Myosin regulatory light chain 12B OS=Homo sapiens GN=MYL12B PE=1 SV=2	0.293333	-1.89	0.893381	0.0614697			5.45	0.74	0.023749	9	8	0	13	11	0	9	9	0	8	7	0	11	9	0	18	12	0	3	3	0	2	2	0	3	3	0	4	3	0	4	4	0	2	2	0	22.19	26.97
PABP1_HUMAN	P11940	Polyadenylate-binding protein 1 OS=Homo sapiens GN=PABPC1 PE=1 SV=2	0.21	-0.0733337	0.885709	0.863041			5.71	0.73	0.014102	20	17	3	35	26	5	26	18	5	22	16	4	24	17	3	32	25	5	22	14	3	22	17	2	24	18	5	19	13	2	21	13	2	10	10	2	24.1	27.4
RL35_HUMAN	P42766	60S ribosomal protein L35 OS=Homo sapiens GN=RPL35 PE=1 SV=2	0.393334	-0.21	0.851644	0.719657			3.43	0.68	0.007464	8	6	6	9	6	6	11	8	8	11	8	8	10	7	7	14	8	8	6	4	4	8	5	5	10	6	6	9	7	7	6	5	5	1	1	1	24.18	28.94
FEN1_HUMAN	P39748	Flap endonuclease 1 OS=Homo sapiens GN=FEN1 PE=1 SV=1	0.666667	-0.683333	0.658179	0.113964			4.82	0.73	0.026598	7	7	7	6	6	6	8	7	7	4	4	4	4	4	4	7	7	7	6	6	6	13	10	10	14	11	11	11	9	9	10	7	7	3	3	3	22.16	25.53
RAB8B_HUMAN	Q92930	Ras-related protein Rab-8B OS=Homo sapiens GN=RAB8B PE=1 SV=2	-0.23	-1.63667	0.925611	0.114614			2.49	0.61	0.07803	3	2	0	7	5	2	5	3	0	2	2	0	2	2	0	5	4	1	2	2	0	2	2	0	2	2	0	2	2	0	2	2	0	1	1	0	20.61	25.39
HS904_HUMAN	Q58FG1	Putative heat shock protein HSP 90-alpha A4 OS=Homo sapiens GN=HSP90AA4P PE=5 SV=1	0.77	-4.43612	0.636575	0.190749			3.25	0.65	0.033085	8	1	0	8	1	0	6	1	0	5	1	0	5	2	0	5	1	0	0	0	0	1	1	0	0	0	0	4	2	0	1	1	0	5	1	0	21.33	25.14
ILF3_HUMAN	Q12906	Interleukin enhancer-binding factor 3 OS=Homo sapiens GN=ILF3 PE=1 SV=3	-0.0699997	0.293334	0.954506	0.245253			6.81	0.74	0.001152	21	17	13	17	14	12	20	15	13	14	12	10	15	13	11	17	15	13	29	19	15	27	17	14	38	24	21	25	16	13	28	18	13	11	10	8	23.15	25.77
SRSF1_HUMAN	Q07955	Serine/arginine-rich splicing factor 1 OS=Homo sapiens GN=SRSF1 PE=1 SV=2	0.250001	-1.31333	0.87918	0.0505474			3.75	0.75	0.004641	11	7	7	22	12	12	23	10	10	12	7	7	12	7	7	33	12	12	7	5	5	12	6	6	12	6	6	9	6	6	12	8	8	3	3	3	23.08	27.01
EIF3L_HUMAN	Q9Y262	Eukaryotic translation initiation factor 3 subunit L OS=Homo sapiens GN=EIF3L PE=1 SV=1	0.146666	-0.793333	0.915824	0.0831767			4.93	0.82	0.000291	17	16	16	21	18	18	37	22	22	21	18	18	19	17	17	25	22	22	22	19	19	16	15	15	29	20	20	17	17	17	21	18	18	8	8	8	22.99	26.14
DX39B_HUMAN	Q13838	Spliceosome RNA helicase DDX39B OS=Homo sapiens GN=DDX39B PE=1 SV=1	0.38	-0.693333	0.810231	0.209945			4.23	0.73	0.011275	6	6	0	9	8	1	7	5	1	6	6	2	8	7	1	9	9	3	6	6	1	7	7	2	8	8	2	9	7	1	5	5	2	3	3	0	22.34	25.95
DX39A_HUMAN	O00148	ATP-dependent RNA helicase DDX39A OS=Homo sapiens GN=DDX39A PE=1 SV=2	0.383333	-0.706666	0.806657	0.229651			3.83	0.67	0.011275	6	6	0	8	8	1	5	4	0	4	4	0	7	6	0	7	7	1	5	5	0	5	5	0	6	6	0	7	6	0	3	3	0	3	3	0	22.34	25.86
H2B2C_HUMAN	Q6DN03	Putative histone H2B type 2-C OS=Homo sapiens GN=HIST2H2BC PE=5 SV=3	-0.205084	-5.19362	0.951508	0.0777013			3.14	0.64	0.015926	1	1	0	2	2	0	2	2	0	3	2	0	0	0	0	5	3	0	0	0	0	0	0	0	1	1	0	3	2	0	1	1	0	1	1	0	19.36	23.48
SPTN1_HUMAN	Q13813	Spectrin alpha chain, non-erythrocytic 1 OS=Homo sapiens GN=SPTAN1 PE=1 SV=3	-0.106667	-1.00667	0.955553	0.105835			6.43	0.81	0.00048	135	103	103	220	140	140	172	120	120	142	108	108	132	99	99	247	151	151	48	44	44	47	42	42	62	55	55	49	48	48	69	66	66	46	43	43	22.83	27.15
S10AB_HUMAN	P31949	Protein S100-A11 OS=Homo sapiens GN=S100A11 PE=1 SV=2	0.896666	-0.133986	0.57825	0.967856			2.81	0.73	0.034305	1	1	1	2	2	2	1	1	1	1	1	1	1	1	1	1	1	1	0	0	0	2	2	2	1	1	1	0	0	0	1	1	1	1	1	1	21.76	24.85
LA_HUMAN	P05455	Lupus La protein OS=Homo sapiens GN=SSB PE=1 SV=2	0.779999	-0.79	0.578906	0.0511661			5.82	0.78	0.003607	14	10	10	12	10	10	13	10	10	8	6	6	16	11	11	15	12	12	12	8	8	17	11	11	14	11	11	9	7	7	14	10	10	9	5	5	21.55	23.99
HNRPM_HUMAN	P52272	Heterogeneous nuclear ribonucleoprotein M OS=Homo sapiens GN=HNRNPM PE=1 SV=3	0.363333	0.249999	0.706553	0.49607			5.84	0.76	0.009504	35	22	22	30	24	24	25	17	17	28	20	20	28	19	19	25	19	19	30	18	18	35	25	25	40	23	23	31	20	20	29	16	16	13	12	12	24.03	25.91
CAZA1_HUMAN	P52907	F-actin-capping protein subunit alpha-1 OS=Homo sapiens GN=CAPZA1 PE=1 SV=3	0.986667	-0.950001	0.568902	0.0763762			5.35	0.79	0.005499	9	7	5	13	11	9	13	9	6	8	7	5	7	7	5	11	8	7	7	6	3	9	9	6	6	6	4	10	7	4	10	8	6	4	4	4	22.25	25.93
CDK17_HUMAN	Q00537	Cyclin-dependent kinase 17 OS=Homo sapiens GN=CDK17 PE=1 SV=2	0.983334	-0.47	0.357986	0.246024			4.21	0.62	0.001391	17	14	10	3	2	1	7	6	4	3	1	0	2	1	0	3	1	0	14	10	5	8	5	3	16	11	7	4	1	0	5	2	1	2	1	0	23.23	23.87
RAB10_HUMAN	P61026	Ras-related protein Rab-10 OS=Homo sapiens GN=RAB10 PE=1 SV=1	-0.0799999	-1.64333	0.97761	0.115282			4.48	0.75	0.01821	3	2	1	13	9	8	10	5	4	2	2	1	4	3	2	9	7	6	2	2	1	2	2	1	2	2	1	2	2	1	2	2	1	1	1	0	20.43	26.35
RAB8A_HUMAN	P61006	Ras-related protein Rab-8A OS=Homo sapiens GN=RAB8A PE=1 SV=1	-0.013333	-1.65333	0.995777	0.123742			3.44	0.73	0.005176	5	4	2	10	6	3	9	5	2	4	4	2	4	4	2	8	6	3	2	2	0	4	4	2	2	2	0	4	4	2	3	3	1	1	1	0	20.75	25.93
RAB1C_HUMAN	Q92928	Putative Ras-related protein Rab-1C OS=Homo sapiens GN=RAB1C PE=5 SV=2	-0.346666	-1.81667	0.899289	0.107923			4.73	0.73	0.007165	4	3	0	7	5	0	5	3	0	2	2	0	2	2	0	5	4	0	1	1	0	2	2	0	1	1	0	2	2	0	2	2	0	1	1	0	20.54	25.41
CDK16_HUMAN	Q00536	Cyclin-dependent kinase 16 OS=Homo sapiens GN=CDK16 PE=1 SV=1	0.46	-0.853333	0.678143	0.085252			2.95	0.62	0.009716	5	3	0	2	1	0	2	1	0	3	1	0	2	1	0	3	1	0	6	3	0	5	2	0	6	3	0	4	1	0	4	1	0	2	1	0	22.21	23.8
RAB15_HUMAN	P59190	Ras-related protein Rab-15 OS=Homo sapiens GN=RAB15 PE=1 SV=1	-1.06	-1.79	0.661	0.112818			2.49	0.48	0.07803	2	1	0	2	1	0	3	1	0	1	1	0	1	1	0	2	1	0	1	1	0	1	1	0	1	1	0	1	1	0	1	1	0	1	1	0	20.1	23.48
ARPC4_HUMAN	P59998	Actin-related protein 2/3 complex subunit 4 OS=Homo sapiens GN=ARPC4 PE=1 SV=3	0.38	-1.89	0.851686	0.0686529			2.68	0.61	0.032074	3	3	3	3	3	3	2	2	2	3	3	3	3	3	3	3	3	3	4	3	3	4	4	4	3	3	3	5	4	4	4	4	4	2	2	2	20.28	24.34
RAB6A_HUMAN	P20340	Ras-related protein Rab-6A OS=Homo sapiens GN=RAB6A PE=1 SV=3	1.21667	-1.87	0.613649	0.128169			2.68	0.65	0.022609	2	2	0	14	9	5	9	6	2	4	3	1	7	5	1	13	8	4	2	1	0	4	3	1	1	1	0	2	2	0	3	3	0	1	1	0	20.43	26.85
RAB6B_HUMAN	Q9NRW1	Ras-related protein Rab-6B OS=Homo sapiens GN=RAB6B PE=1 SV=1	1.29667	-1.90667	0.579694	0.116808			2.68	0.65	0.02744	2	2	0	8	4	0	7	4	0	3	2	0	5	4	0	8	4	0	2	1	0	3	2	0	1	1	0	2	2	0	3	3	0	1	1	0	20.43	26.74
UB2L3_HUMAN	P68036	Ubiquitin-conjugating enzyme E2 L3 OS=Homo sapiens GN=UBE2L3 PE=1 SV=1	0.463334	-4.47184	0.716563	0.111418			3.43	0.62	0.085443	2	2	2	3	3	3	3	3	3	2	2	2	2	2	2	3	3	3	0	0	0	2	2	2	2	2	2	3	3	3	3	3	3	2	2	2	21.11	23.86
FSCN1_HUMAN	Q16658	Fascin OS=Homo sapiens GN=FSCN1 PE=1 SV=3	0.713334	-1.01667	0.550937	0.0950433			4.84	0.74	0.027682	6	6	6	3	3	3	4	4	4	3	3	3	4	4	4	4	4	4	5	5	5	9	8	8	8	7	7	8	8	8	6	5	5	3	3	3	21.74	23.7
RB39A_HUMAN	Q14964	Ras-related protein Rab-39A OS=Homo sapiens GN=RAB39A PE=2 SV=2	1.64333	-1.78333	0.455546	0.152357			2.95	0.65	0.030669	1	1	0	6	2	1	4	1	0	2	1	0	2	1	0	6	2	1	2	1	0	2	1	0	1	1	0	1	1	0	1	1	0	1	1	0	20.18	26.44
IPYR_HUMAN	Q15181	Inorganic pyrophosphatase OS=Homo sapiens GN=PPA1 PE=1 SV=2	1.17	-4.25594	0.422245	0.0672611			4.81	0.78	0.007863	9	7	7	7	5	5	9	8	8	8	6	6	7	5	5	10	8	8	0	0	0	7	6	6	4	4	4	10	8	8	8	5	5	4	4	4	21.43	24.1
SIAH2_HUMAN	O43255	E3 ubiquitin-protein ligase SIAH2 OS=Homo sapiens GN=SIAH2 PE=1 SV=1	0.246667	-1.31333	0.782094	0.070575			2.4	0.6	0.036845	4	3	0	2	2	0	4	4	0	5	4	0	5	4	0	2	2	0	3	3	0	5	3	0	2	2	0	4	3	0	5	3	0	2	2	0	21.48	24.26
DYL1_HUMAN	P63167	Dynein light chain 1, cytoplasmic OS=Homo sapiens GN=DYNLL1 PE=1 SV=1	0.213333	-1.97333	0.859501	0.0761111			3.44	0.62	0.009652	3	3	2	2	1	0	3	2	1	2	2	1	5	3	2	5	3	2	3	3	2	4	3	2	4	3	2	5	4	3	6	4	3	1	1	1	23.45	25.34
GSTM5_HUMAN	P46439	Glutathione S-transferase Mu 5 OS=Homo sapiens GN=GSTM5 PE=1 SV=3	0.290001	-1.64667	0.760667	0.0576567			2.25	0.57	0.048858	2	2	0	1	1	0	2	2	0	1	1	0	3	3	0	1	1	0	1	1	0	2	2	0	1	1	0	3	3	0	2	2	0	1	1	0	20.7	22.53
GSTM2_HUMAN	P28161	Glutathione S-transferase Mu 2 OS=Homo sapiens GN=GSTM2 PE=1 SV=2	0.31	-1.60333	0.761462	0.058489			2.25	0.49	0.048858	1	1	0	2	2	0	1	1	0	1	1	0	1	1	0	1	1	0	1	1	0	1	1	0	1	1	0	1	1	0	1	1	0	1	1	0	20.59	22.59
EIF3K_HUMAN	Q9UBQ5	Eukaryotic translation initiation factor 3 subunit K OS=Homo sapiens GN=EIF3K PE=1 SV=1	0.326667	-1.77	0.845315	0.0604476			3.55	0.69	0.033054	3	3	3	6	4	4	4	4	4	3	2	2	2	2	2	4	4	4	2	2	2	2	2	2	3	3	3	3	3	3	1	1	1	1	1	1	21.63	25.34
EIF3B_HUMAN	P55884	Eukaryotic translation initiation factor 3 subunit B OS=Homo sapiens GN=EIF3B PE=1 SV=3	0.506667	0.143333	0.754436	0.691373			5.31	0.74	0.003994	12	10	10	21	19	19	16	14	14	12	10	10	10	8	8	20	17	17	16	12	12	13	11	11	12	10	10	10	9	9	11	9	9	6	6	6	22.83	26.33
PSD11_HUMAN	O00231	26S proteasome non-ATPase regulatory subunit 11 OS=Homo sapiens GN=PSMD11 PE=1 SV=3	0.256667	-1.18333	0.801676	0.0607368			3.72	0.72	0.039061	9	8	8	5	5	5	8	7	7	5	5	5	8	8	8	9	8	8	8	8	8	14	13	13	14	12	12	12	10	10	16	15	15	6	6	6	21.16	23.26
TALDO_HUMAN	P37837	Transaldolase OS=Homo sapiens GN=TALDO1 PE=1 SV=2	1.16	-1.51	0.455478	0.296819			3.45	0.63	0.021101	10	9	9	8	8	8	7	7	7	6	6	6	5	5	5	6	6	6	5	5	5	10	10	10	11	10	10	12	9	9	10	9	9	5	4	4	22.36	25.05
RAC1_HUMAN	P63000	Ras-related C3 botulinum toxin substrate 1 OS=Homo sapiens GN=RAC1 PE=1 SV=1	0.209999	-2.58667	0.912589	0.150089			3.13	0.61	0.002504	3	3	2	5	5	3	4	4	1	4	4	2	4	4	2	3	3	1	1	1	1	5	5	2	2	2	0	3	3	2	4	4	1	2	2	1	20.8	25.16
FRIH_HUMAN	P02794	Ferritin heavy chain OS=Homo sapiens GN=FTH1 PE=1 SV=2	0.096667	-0.936667	0.96299	0.126077			2.91	0.66	0.002063	7	5	5	11	8	8	11	6	6	9	5	5	7	4	4	12	8	8	5	4	4	9	7	7	9	7	7	9	6	6	8	6	6	2	2	2	21.39	26.04
ERF1_HUMAN	P62495	Eukaryotic peptide chain release factor subunit 1 OS=Homo sapiens GN=ETF1 PE=1 SV=3	1.34667	-1.38333	0.387581	0.121498			3.6	0.73	0.007013	4	3	3	6	5	5	4	3	3	5	4	4	3	2	2	5	4	4	3	3	3	7	6	6	7	6	6	5	5	5	4	4	4	4	4	4	21.68	24.34
ELOC_HUMAN	Q15369	Transcription elongation factor B polypeptide 1 OS=Homo sapiens GN=TCEB1 PE=1 SV=1	0.0599995	-1.43667	0.971571	0.144322			4.43	0.8	0.015578	4	2	2	1	1	1	3	2	2	2	2	2	2	2	2	5	4	4	2	2	2	5	4	4	3	3	3	4	3	3	2	1	1	1	1	1	22.01	21.3
MARE1_HUMAN	Q15691	Microtubule-associated protein RP/EB family member 1 OS=Homo sapiens GN=MAPRE1 PE=1 SV=3	0.576667	-2.45667	0.741789	0.0568025			5.34	0.73	0.001793	6	6	6	10	6	6	10	7	7	7	5	5	7	6	6	11	8	6	4	3	3	7	6	6	4	3	3	9	6	6	6	5	5	4	4	4	21.14	24.87
S10AA_HUMAN	P60903	Protein S100-A10 OS=Homo sapiens GN=S100A10 PE=1 SV=2	-2.01333	-5.13653	0.542458	0.0755782			3.35	0.66	0.000591	4	1	1	8	2	2	6	2	2	5	2	2	3	2	2	6	3	3	0	0	0	3	1	1	2	1	1	3	2	2	3	1	1	2	1	1	17.4	26.39
B2MG_HUMAN	P61769	Beta-2-microglobulin OS=Homo sapiens GN=B2M PE=1 SV=1	0.586666	-2.76667	0.815907	0.0795957			2.86	0.65	0.009246	2	1	1	5	4	4	3	2	2	2	2	2	3	2	2	6	3	3	1	1	1	2	1	1	2	1	1	3	2	2	2	1	1	2	2	2	19.91	25.84
PCBP3_HUMAN	P57721	Poly(rC)-binding protein 3 OS=Homo sapiens GN=PCBP3 PE=1 SV=2	-1.27931	-1.23667	0.689248	0.178563			4.88	0.75	0.006353	1	1	0	2	1	0	0	0	0	2	1	0	0	0	0	4	2	0	2	1	0	4	2	0	6	3	0	4	2	0	3	2	0	3	2	0	19.45	21.33
MYL6B_HUMAN	P14649	Myosin light chain 6B OS=Homo sapiens GN=MYL6B PE=1 SV=1	-2.08723	-1.58	0.528002	0.0657838			3.31	0.67	0.24018	1	1	0	1	1	0	0	0	0	1	1	0	2	1	0	1	1	0	1	1	0	1	1	0	1	1	0	1	1	0	1	1	0	1	1	0	21.7	25.37
TRA2B_HUMAN	P62995	Transformer-2 protein homolog beta OS=Homo sapiens GN=TRA2B PE=1 SV=1	0.416666	-1.04333	0.849402	0.100231			3.36	0.77	0.004472	3	3	3	6	4	4	7	4	4	4	4	4	3	2	2	6	4	4	2	1	1	4	3	3	3	3	3	3	3	3	2	2	2	2	2	2	20.83	26.09
STIP1_HUMAN	P31948	Stress-induced-phosphoprotein 1 OS=Homo sapiens GN=STIP1 PE=1 SV=1	0.403333	-0.193333	0.764078	0.722347			4.76	0.74	0.000328	17	14	14	14	12	12	21	15	15	15	13	13	15	9	9	19	14	14	28	18	18	29	16	16	29	17	17	34	21	21	30	17	17	11	7	7	22.45	25.22
SERC_HUMAN	Q9Y617	Phosphoserine aminotransferase OS=Homo sapiens GN=PSAT1 PE=1 SV=2	1.03667	-1.18	0.370135	0.235549			3.52	0.74	0.001354	10	8	8	9	8	8	8	7	7	5	5	5	8	7	7	7	5	5	3	3	3	9	8	8	8	8	8	7	6	6	9	7	7	5	5	5	21.19	23.39
S10A6_HUMAN	P06703	Protein S100-A6 OS=Homo sapiens GN=S100A6 PE=1 SV=1	3.68581	1.34548	0.26593	0.688894			1.85	0.39	0.121662	1	1	1	3	3	3	1	1	1	0	0	0	0	0	0	2	2	2	0	0	0	1	1	1	1	1	1	0	0	0	0	0	0	1	1	1	20.57	25.13
CC124_HUMAN	Q96CT7	Coiled-coil domain-containing protein 124 OS=Homo sapiens GN=CCDC124 PE=1 SV=1	0.583333	-0.683333	0.518409	0.243465			3.45	0.72	0.009756	13	9	9	7	7	7	11	9	9	10	8	8	7	6	6	8	7	7	9	8	8	11	7	7	10	7	7	11	8	8	10	8	8	4	4	4	22.31	23.81
CCNB1_HUMAN	P14635	G2/mitotic-specific cyclin-B1 OS=Homo sapiens GN=CCNB1 PE=1 SV=1	0.830001	-1.39	0.490633	0.0922052			4.25	0.69	0.004795	7	6	6	6	6	6	6	5	5	5	5	5	4	4	4	4	4	4	5	5	5	5	4	4	6	5	5	4	3	3	9	7	7	3	3	3	21.54	23.77
CNN2_HUMAN	Q99439	Calponin-2 OS=Homo sapiens GN=CNN2 PE=1 SV=4	0.4	-1.31	0.627183	0.115992			3.4	0.72	0.000354	5	5	4	4	4	3	5	5	4	4	4	3	5	4	3	3	3	2	4	4	3	7	4	3	5	4	3	5	4	3	9	6	5	2	2	1	21.09	23.06
AHSA1_HUMAN	O95433	Activator of 90 kDa heat shock protein ATPase homolog 1 OS=Homo sapiens GN=AHSA1 PE=1 SV=1	0.755746	-2.85377	0.722768	0.281531			4.52	0.73	0.001529	6	6	6	0	0	0	4	4	4	2	2	2	0	0	0	1	1	1	0	0	0	10	9	9	8	7	7	7	7	7	8	8	8	5	5	5	20.48	14.2788
FPPS_HUMAN	P14324	Farnesyl pyrophosphate synthase OS=Homo sapiens GN=FDPS PE=1 SV=4	0.29	-1.21667	0.83626	0.142715			3.57	0.73	0.008827	6	5	5	5	4	4	4	4	4	4	4	4	5	4	4	6	5	5	5	4	4	6	5	5	7	6	6	7	4	4	6	4	4	3	2	2	21.53	24.21
TM109_HUMAN	Q9BVC6	Transmembrane protein 109 OS=Homo sapiens GN=TMEM109 PE=1 SV=1	0.623333	-4.54355	0.773693	0.11515			2.64	0.72	0.024181	1	1	1	2	1	1	1	1	1	1	1	1	2	1	1	2	1	1	3	2	2	3	3	3	0	0	0	1	1	1	5	5	5	1	1	1	19.21	24.22
LRC59_HUMAN	Q96AG4	Leucine-rich repeat-containing protein 59 OS=Homo sapiens GN=LRRC59 PE=1 SV=1	0.796666	-0.82	0.789344	0.0824649			4.01	0.71	0.000289	4	4	4	11	9	9	5	5	5	3	2	2	4	4	4	11	8	8	6	4	4	8	5	5	10	6	6	9	7	7	10	8	8	2	1	1	19.85	27.11
MDHM_HUMAN	P40926	Malate dehydrogenase, mitochondrial OS=Homo sapiens GN=MDH2 PE=1 SV=3	1.77187	-1.01667	0.732446	0.339688			7.61	0.75	0.023504	1	1	1	41	11	11	7	7	7	0	0	0	2	2	2	24	11	11	4	4	4	14	9	9	11	7	7	9	6	6	7	6	6	3	3	3	16.1	28.84
GSTO1_HUMAN	P78417	Glutathione S-transferase omega-1 OS=Homo sapiens GN=GSTO1 PE=1 SV=2	0.866666	-1.88333	0.675232	0.0641902			4.31	0.67	0.009614	6	6	6	8	7	7	6	6	6	3	2	2	5	5	5	10	8	8	3	3	3	10	7	7	8	7	7	12	8	8	9	6	6	3	3	3	20.56	24.23
UB2V1_HUMAN	Q13404	Ubiquitin-conjugating enzyme E2 variant 1 OS=Homo sapiens GN=UBE2V1 PE=1 SV=2	0.0866674	-2.27333	0.958935	0.100647			2.46	0.61	0.10861	2	2	1	1	1	0	1	1	0	1	1	0	2	2	0	2	2	0	1	1	0	3	3	1	2	2	1	2	2	1	2	2	1	2	2	1	18.75	22.86
PSD7_HUMAN	P51665	26S proteasome non-ATPase regulatory subunit 7 OS=Homo sapiens GN=PSMD7 PE=1 SV=2	0.76	-0.63	0.613706	0.236703			6.65	0.8	0.005845	1	1	1	4	3	3	6	4	4	2	2	2	3	2	2	4	3	3	6	4	4	7	6	6	5	4	4	3	3	3	5	5	5	3	3	3	19.33	22.8
PSA3_HUMAN	P25788	Proteasome subunit alpha type-3 OS=Homo sapiens GN=PSMA3 PE=1 SV=2	0.236666	-0.886667	0.851054	0.285908			3.85	0.78	0.016587	10	9	9	9	7	7	10	7	7	8	7	7	9	8	8	10	8	8	4	4	4	9	8	8	7	7	7	12	10	10	11	10	10	1	1	1	23.33	25.5
FBLL1_HUMAN	A6NHQ2	rRNA/tRNA 2'-O-methyltransferase fibrillarin-like protein 1 OS=Homo sapiens GN=FBLL1 PE=3 SV=1	0.71	-1.54	0.743699	0.126312			3.18	0.63	0.009366	4	2	1	4	2	1	6	3	2	5	3	2	6	3	2	5	3	2	2	2	1	4	2	1	6	3	2	4	2	1	4	2	1	2	2	1	20.7	25.46
EFHD1_HUMAN	Q9BUP0	EF-hand domain-containing protein D1 OS=Homo sapiens GN=EFHD1 PE=1 SV=1	-0.512822	-1.18667	0.768697	0.104579			2.83	0.63	0.01708	2	2	0	0	0	0	1	1	0	1	1	0	2	2	0	1	1	0	2	1	0	2	1	0	3	2	0	2	2	0	2	2	0	1	1	0	21.08	16.9515
DEST_HUMAN	P60981	Destrin OS=Homo sapiens GN=DSTN PE=1 SV=3	0.41	-1.99667	0.804396	0.070378			2.67	0.72	0.007938	2	2	2	1	1	1	1	1	1	1	1	1	1	1	1	2	2	2	1	1	1	4	3	3	4	3	3	3	2	2	4	4	3	1	1	1	19.51	21.85
EIF3H_HUMAN	O15372	Eukaryotic translation initiation factor 3 subunit H OS=Homo sapiens GN=EIF3H PE=1 SV=1	0.47	-0.739999	0.742406	0.107583			5.71	0.74	0.00033	7	6	6	16	12	12	24	13	13	19	9	9	15	10	10	16	10	10	12	10	10	11	7	7	12	8	8	12	8	8	16	11	11	5	4	4	22.07	25.52
PRDX5_HUMAN	P30044	Peroxiredoxin-5, mitochondrial OS=Homo sapiens GN=PRDX5 PE=1 SV=4	2.11333	-2.13333	0.488536	0.0848712			3.97	0.71	0.071327	4	4	4	14	6	6	3	3	3	4	4	4	2	2	2	7	5	5	2	2	2	3	3	3	4	3	3	5	4	4	4	3	3	1	1	1	21.52	27.65
EZRI_HUMAN	P15311	Ezrin OS=Homo sapiens GN=EZR PE=1 SV=4	0.593334	-0.336666	0.738932	0.690681			5.33	0.76	0.015092	14	14	9	26	21	11	20	16	9	14	11	6	12	10	5	28	20	11	12	12	6	27	20	11	26	18	9	19	18	9	19	15	8	7	7	2	22.35	26.4
SIAH1_HUMAN	Q8IUQ4	E3 ubiquitin-protein ligase SIAH1 OS=Homo sapiens GN=SIAH1 PE=1 SV=2	0.126666	-0.92	0.870132	0.155826			3.43	0.66	0.013754	6	5	2	2	2	0	6	6	2	7	6	2	7	6	2	4	4	2	5	5	2	8	6	3	6	5	3	8	6	3	8	6	3	2	2	0	21.41	23.88
HMGB2_HUMAN	P26583	High mobility group protein B2 OS=Homo sapiens GN=HMGB2 PE=1 SV=2	0.213333	-2.09333	0.896909	0.0884594			4.08	0.67	0.001859	9	6	5	8	7	6	13	9	8	12	9	8	12	9	8	12	9	8	6	5	4	8	7	6	4	4	4	11	8	7	8	6	5	1	1	0	22.47	25.82
MO4L2_HUMAN	Q15014	Mortality factor 4-like protein 2 OS=Homo sapiens GN=MORF4L2 PE=1 SV=1	0.37	-0.976666	0.765697	0.0741077			3.34	0.7	0.001361	6	5	5	7	7	5	5	4	4	8	7	6	6	5	5	6	6	5	8	7	6	8	5	5	8	5	5	6	5	5	7	6	5	2	2	2	21.18	23.95
SPTB2_HUMAN	Q01082	Spectrin beta chain, non-erythrocytic 1 OS=Homo sapiens GN=SPTBN1 PE=1 SV=2	-0.136667	-0.893333	0.944878	0.138202	Q01082		5.9	0.8	0.002351	97	75	66	190	122	112	158	107	99	112	82	74	120	92	83	217	132	123	36	33	30	37	35	32	44	38	36	35	35	29	41	39	34	30	28	24	22.3	26.87
HSP74_HUMAN	P34932	Heat shock 70 kDa protein 4 OS=Homo sapiens GN=HSPA4 PE=1 SV=4	0.43	0.0233326	0.678408	0.952491			4.17	0.76	0.000415	18	14	13	19	18	17	22	17	16	16	13	12	16	13	12	15	14	13	15	12	12	15	13	13	18	16	15	13	11	11	13	12	12	8	8	8	22.07	24.31
SEPT2_HUMAN	Q15019	Septin-2 OS=Homo sapiens GN=SEPT2 PE=1 SV=1	-0.0766665	-0.949999	0.947476	0.0612555			5.12	0.86	0.007869	5	5	5	4	4	4	12	8	8	8	8	8	5	5	5	4	4	4	6	5	5	10	10	10	9	9	9	5	4	4	10	10	10	4	3	3	20.27	22.93
DHSO_HUMAN	Q00796	Sorbitol dehydrogenase OS=Homo sapiens GN=SORD PE=1 SV=4	0.946667	-1.88667	0.473738	0.139255			3.42	0.66	0.013612	4	4	4	7	6	6	7	5	5	5	4	4	5	4	4	6	3	3	2	2	2	7	5	5	6	5	5	6	5	5	8	6	6	4	4	4	19.22	23.08
TXD17_HUMAN	Q9BRA2	Thioredoxin domain-containing protein 17 OS=Homo sapiens GN=TXNDC17 PE=1 SV=1	0.4	-1.9	0.722003	0.0504172			2.34	0.66	0.032946	2	2	2	1	1	1	2	2	2	2	2	2	2	2	2	2	2	2	1	1	1	1	1	1	2	2	2	2	2	2	2	2	2	1	1	1	20.79	22.71
DDX3X_HUMAN	O00571	ATP-dependent RNA helicase DDX3X OS=Homo sapiens GN=DDX3X PE=1 SV=3	0.346667	0.39	0.786223	0.308424			6.23	0.68	0.001916	17	15	5	19	16	5	24	17	5	22	17	5	17	14	5	19	16	5	20	14	5	19	15	5	23	18	3	15	12	3	14	12	4	6	6	2	23.44	26.43
LXN_HUMAN	Q9BS40	Latexin OS=Homo sapiens GN=LXN PE=1 SV=2	-0.461485	-2.19667	0.823581	0.128629			4.16	0.72	0.002434	2	2	2	0	0	0	2	2	2	1	1	1	1	1	1	1	1	1	1	1	1	2	1	1	1	1	1	1	1	1	1	1	1	1	1	1	20.42	16.2055
RADI_HUMAN	P35241	Radixin OS=Homo sapiens GN=RDX PE=1 SV=1	0.303333	-0.18	0.870003	0.798852			5.33	0.76	0.007765	7	7	2	20	17	7	14	12	5	12	9	4	11	8	3	21	15	6	12	12	6	20	18	8	21	17	7	16	15	6	15	13	6	6	6	1	21.58	26.05
PNPH_HUMAN	P00491	Purine nucleoside phosphorylase OS=Homo sapiens GN=PNP PE=1 SV=2	0.863334	-2.92667	0.659437	0.0691922			3.92	0.74	0.014648	8	8	8	10	10	9	7	7	7	4	4	4	6	5	4	6	6	6	1	1	1	6	5	5	2	2	2	5	4	4	6	5	4	2	2	2	19.61	24.25
DUS28_HUMAN	Q4G0W2	Dual specificity phosphatase 28 OS=Homo sapiens GN=DUSP28 PE=2 SV=1	3.13711	1.91333	0.421416	0.115517			1.38	0.41	0.017555	3	1	1	0	0	0	1	1	1	0	0	0	2	1	1	0	0	0	5	1	1	3	1	1	3	1	1	2	1	1	3	1	1	1	1	1	23.88	14.8572
FUS_HUMAN	P35637	RNA-binding protein FUS OS=Homo sapiens GN=FUS PE=1 SV=1	0.81	0.46	0.584901	0.435131			5.91	0.75	0.003787	13	8	7	16	9	7	15	8	6	8	5	5	11	7	6	11	8	7	9	4	3	15	6	5	13	8	7	6	5	3	8	6	4	4	4	3	23.71	26.54
APT_HUMAN	P07741	Adenine phosphoribosyltransferase OS=Homo sapiens GN=APRT PE=1 SV=2	1.2	-2.39667	0.351437	0.196274			3.57	0.62	0.022822	2	2	2	4	4	4	3	3	3	2	2	2	3	3	3	2	2	2	1	1	1	3	3	3	2	2	2	3	3	3	1	1	1	2	2	2	20.35	23.91
MP2K1_HUMAN	Q02750	Dual specificity mitogen-activated protein kinase kinase 1 OS=Homo sapiens GN=MAP2K1 PE=1 SV=2	0.626666	-1.18	0.701353	0.100879			3.98	0.63	0.065279	2	2	1	3	3	3	3	3	1	3	3	1	1	1	0	3	3	1	3	3	3	6	6	4	8	7	5	6	6	4	7	7	4	3	3	3	19.75	22.55
RUXF_HUMAN	P62306	Small nuclear ribonucleoprotein F OS=Homo sapiens GN=SNRPF PE=1 SV=1	2.05912	-1.3	0.480061	0.252251			3.38	0.81	0.043327	1	1	1	3	3	3	3	1	1	1	1	1	1	1	1	4	2	2	1	1	1	1	1	1	1	1	1	1	1	1	1	1	1	1	1	1	20.29	24.78
RL6_HUMAN	Q02878	60S ribosomal protein L6 OS=Homo sapiens GN=RPL6 PE=1 SV=3	0.97	0.29	0.689627	0.58534			5.76	0.74	0.005332	22	12	12	30	16	16	28	14	14	22	14	14	23	14	14	31	16	16	25	12	12	17	11	11	18	12	12	12	9	9	15	11	11	5	5	5	23.26	28.45
AIMP2_HUMAN	Q13155	Aminoacyl tRNA synthase complex-interacting multifunctional protein 2 OS=Homo sapiens GN=AIMP2 PE=1 SV=2	1.34361	-1.01	0.623492	0.517846			5.66	0.81	0.021517	1	1	1	3	3	3	1	1	1	0	0	0	0	0	0	1	1	1	2	1	1	4	3	3	4	2	2	1	1	1	4	3	3	2	2	2	15.54	22.03
PARP1_HUMAN	P09874	Poly [ADP-ribose] polymerase 1 OS=Homo sapiens GN=PARP1 PE=1 SV=4	0.993334	-0.0633335	0.509	0.858547			5.11	0.74	0.014966	19	18	18	20	20	20	20	16	16	17	15	15	10	9	9	23	20	20	29	22	22	19	15	15	27	23	23	21	15	15	22	18	18	11	10	10	22.29	24.59
APEX1_HUMAN	P27695	DNA-(apurinic or apyrimidinic site) lyase OS=Homo sapiens GN=APEX1 PE=1 SV=2	0.32	-1.06333	0.859185	0.152984			4.2	0.78	0.001999	7	7	7	16	9	9	14	9	9	10	8	8	10	8	8	10	8	8	8	6	6	8	7	7	10	7	7	10	7	7	12	7	7	3	2	2	21.39	25.66
KCY_HUMAN	P30085	UMP-CMP kinase OS=Homo sapiens GN=CMPK1 PE=1 SV=3	0.940001	-2.76667	0.599581	0.0583547			3.13	0.67	0.009456	3	3	3	5	4	4	3	3	3	2	2	2	2	2	2	5	4	4	1	1	1	4	3	3	3	3	3	5	4	4	6	5	5	2	2	2	19.99	23.29
IF4G1_HUMAN	Q04637	Eukaryotic translation initiation factor 4 gamma 1 OS=Homo sapiens GN=EIF4G1 PE=1 SV=4	0.45	-0.183333	0.816916	0.608244	Q04637	Q04637	4.36	0.72	0.009224	37	31	29	66	45	41	61	45	42	30	24	22	30	24	22	65	43	40	30	26	23	30	27	23	30	26	23	26	24	21	30	24	21	9	9	9	21.68	25.84
TPX2_HUMAN	Q9ULW0	Targeting protein for Xklp2 OS=Homo sapiens GN=TPX2 PE=1 SV=2	-0.14	-0.466667	0.921261	0.54871			5.55	0.73	0.004177	18	14	14	14	13	13	12	11	11	17	15	15	13	12	12	21	18	18	10	9	9	11	11	11	18	14	14	16	14	14	10	9	9	6	6	6	22.79	24.97
MGN2_HUMAN	Q96A72	Protein mago nashi homolog 2 OS=Homo sapiens GN=MAGOHB PE=1 SV=1	1.14	-2.08333	0.57331	0.0542049			4.33	0.74	0.03515	4	3	0	6	5	0	3	2	0	2	2	0	3	3	0	6	6	0	1	1	0	1	1	0	4	3	0	5	4	0	4	3	0	1	1	0	20.71	24.2
MGN_HUMAN	P61326	Protein mago nashi homolog OS=Homo sapiens GN=MAGOH PE=1 SV=1	1.14	-2.08333	0.57331	0.0542049			4.33	0.74	0.03515	4	3	0	6	5	0	3	2	0	2	2	0	3	3	0	6	6	0	1	1	0	1	1	0	4	3	0	5	4	0	4	3	0	1	1	0	20.71	24.2
PP1A_HUMAN	P62136	Serine/threonine-protein phosphatase PP1-alpha catalytic subunit OS=Homo sapiens GN=PPP1CA PE=1 SV=1	0.896667	0.783333	0.639884	0.21749			4.88	0.78	0.028603	8	6	4	11	7	4	11	8	4	7	6	4	7	6	4	10	7	3	11	6	3	15	8	4	17	8	4	9	6	4	9	6	3	2	2	2	21.41	25.5
SBDS_HUMAN	Q9Y3A5	Ribosome maturation protein SBDS OS=Homo sapiens GN=SBDS PE=1 SV=4	0.846667	-2.05333	0.664943	0.0873038			3.6	0.67	0.013786	5	5	5	7	6	6	5	4	4	3	3	3	2	2	2	7	5	5	2	2	2	5	5	5	2	2	2	4	4	4	3	3	3	3	3	3	20.11	23.8
DOPD_HUMAN	P30046	D-dopachrome decarboxylase OS=Homo sapiens GN=DDT PE=1 SV=3	2.21667	-4.64383	0.393736	0.0676559			4.18	0.72	0.004398	2	1	0	3	2	1	3	2	1	1	1	0	1	1	0	3	2	1	0	0	0	0	0	0	2	2	0	2	2	0	1	1	0	1	1	0	20.02	24.25
FKBP3_HUMAN	Q00688	Peptidyl-prolyl cis-trans isomerase FKBP3 OS=Homo sapiens GN=FKBP3 PE=1 SV=1	0.503333	-2.54	0.837629	0.0512229			6.6	0.76	0.008839	6	6	6	11	10	10	13	10	10	7	7	7	7	6	6	13	10	10	2	2	2	5	5	5	4	4	4	7	7	7	9	9	9	2	2	2	20.83	26.45
KYNU_HUMAN	Q16719	Kynureninase OS=Homo sapiens GN=KYNU PE=1 SV=1	0.553333	-1.22	0.73741	0.112023			5.77	0.73	0.013642	5	4	4	10	8	8	5	5	5	6	6	6	4	4	4	7	7	7	5	5	5	8	7	7	7	6	6	10	8	8	9	8	8	5	3	3	21.24	24.86
UBE2S_HUMAN	Q16763	Ubiquitin-conjugating enzyme E2 S OS=Homo sapiens GN=UBE2S PE=1 SV=2	0.796666	-1.26333	0.616377	0.0999592			4.06	0.77	0.020601	3	3	3	5	4	4	5	3	3	3	3	3	2	1	1	4	4	4	3	3	3	5	4	4	3	3	3	4	3	3	4	4	4	2	2	2	20.52	24.34
EXOS5_HUMAN	Q9NQT4	Exosome complex component RRP46 OS=Homo sapiens GN=EXOSC5 PE=1 SV=1	0.523333	-1.34333	0.73622	0.0958579			2.69	0.6	0.008441	1	1	1	2	2	2	1	1	1	1	1	1	1	1	1	3	3	3	1	1	1	2	2	2	3	3	3	1	1	1	1	1	1	2	2	2	19.96	23.47
MAP4_HUMAN	P27816	Microtubule-associated protein 4 OS=Homo sapiens GN=MAP4 PE=1 SV=3	0.0799999	-0.0866667	0.942407	0.776422			4.77	0.75	0.001327	25	17	17	24	18	18	26	15	15	26	20	20	22	17	17	24	18	18	25	17	17	30	20	20	34	22	22	32	20	20	27	17	17	10	8	8	21.44	23.8
PRPS1_HUMAN	P60891	Ribose-phosphate pyrophosphokinase 1 OS=Homo sapiens GN=PRPS1 PE=1 SV=2	1.02	-1.13	0.518666	0.110801			4.12	0.74	0.004617	7	5	0	5	5	1	8	5	0	4	3	0	8	5	0	7	5	1	5	3	0	9	6	1	9	6	1	10	4	1	12	6	1	2	2	1	21.21	24.11
HNRPL_HUMAN	P14866	Heterogeneous nuclear ribonucleoprotein L OS=Homo sapiens GN=HNRNPL PE=1 SV=2	-0.0866667	-0.419999	0.939153	0.373116			6.14	0.8	0.002432	7	5	5	7	7	7	8	6	6	6	5	5	7	5	5	7	6	6	10	7	7	9	5	5	16	9	9	9	8	8	9	7	7	6	5	5	22.05	24.53
PDXK_HUMAN	O00764	Pyridoxal kinase OS=Homo sapiens GN=PDXK PE=1 SV=1	0.73	-2.5812	0.600369	0.187133			3.23	0.61	0.026636	2	2	2	3	3	3	1	1	1	3	3	3	3	3	3	1	1	1	0	0	0	4	4	4	4	4	4	4	4	4	5	5	5	2	2	2	18.95	22.53
NEP1_HUMAN	Q92979	Ribosomal RNA small subunit methyltransferase NEP1 OS=Homo sapiens GN=EMG1 PE=1 SV=4	0.833333	-2.46667	0.680004	0.108174			3.6	0.62	0.045449	4	4	4	3	3	3	3	3	3	3	3	3	4	3	3	5	4	4	1	1	1	4	3	3	5	4	4	4	3	3	5	4	4	2	2	2	19.69	23.89
G3BP1_HUMAN	Q13283	Ras GTPase-activating protein-binding protein 1 OS=Homo sapiens GN=G3BP1 PE=1 SV=1	0.583333	-0.3	0.703963	0.411014			6.58	0.8	0.004992	19	11	11	23	12	12	25	13	13	19	10	10	20	12	12	27	15	15	13	9	9	6	4	4	14	9	9	8	7	7	7	6	6	4	3	3	23.81	27.21
GANAB_HUMAN	Q14697	Neutral alpha-glucosidase AB OS=Homo sapiens GN=GANAB PE=1 SV=3	0.946667	-0.19	0.524775	0.796023			5.61	0.75	0.005866	16	14	14	17	16	16	14	14	14	8	8	8	13	11	11	18	17	17	14	13	13	21	20	20	18	17	17	20	17	17	15	13	13	7	7	7	22.2	24.74
PGM1_HUMAN	P36871	Phosphoglucomutase-1 OS=Homo sapiens GN=PGM1 PE=1 SV=3	1.99	-2.16667	0.150957	0.097308			3.72	0.7	0.054665	5	5	5	3	3	3	2	2	2	3	3	3	1	1	1	1	1	1	2	2	2	8	8	8	10	8	8	10	10	10	8	8	8	5	5	5	19.86	21.65
PSME1_HUMAN	Q06323	Proteasome activator complex subunit 1 OS=Homo sapiens GN=PSME1 PE=1 SV=1	-0.0733331	-0.98	0.9616	0.264116			3.15	0.7	0.047783	5	4	4	3	3	3	7	6	6	4	4	4	4	4	4	7	6	6	3	3	3	6	6	6	5	5	5	4	3	3	5	5	5	3	3	3	19.87	22.97
S10A4_HUMAN	P26447	Protein S100-A4 OS=Homo sapiens GN=S100A4 PE=1 SV=1	1.68	-2.05333	0.426474	0.148199			2.66	0.6	0.039268	6	4	4	4	3	3	5	3	3	1	1	1	3	2	2	4	3	3	1	1	1	3	3	3	2	2	2	3	3	3	3	3	3	1	1	1	23.96	26.44
CNN3_HUMAN	Q15417	Calponin-3 OS=Homo sapiens GN=CNN3 PE=1 SV=1	0.626667	-1.37667	0.493987	0.074498			3.8	0.72	0.022915	3	3	2	3	3	2	3	3	2	3	3	2	2	2	1	2	2	1	3	3	2	5	4	3	5	5	4	4	3	2	4	3	2	1	1	0	20.26	22.64
DDTL_HUMAN	A6NHG4	D-dopachrome decarboxylase-like protein OS=Homo sapiens GN=DDTL PE=2 SV=1	2.12667	-5.18542	0.402774	0.0666693			4.18	0.72	0.004398	2	1	0	2	1	0	2	1	0	1	1	0	1	1	0	2	1	0	0	0	0	0	0	0	2	2	0	2	2	0	1	1	0	1	1	0	19.83	23.81
NNMT_HUMAN	P40261	Nicotinamide N-methyltransferase OS=Homo sapiens GN=NNMT PE=1 SV=1	0.98	-2.28667	0.516506	0.0651675			2.58	0.63	0.01791	2	2	2	1	1	1	2	2	2	1	1	1	1	1	1	2	2	2	1	1	1	2	2	2	1	1	1	3	2	2	2	2	2	1	1	1	19.93	22.68
NAMPT_HUMAN	P43490	Nicotinamide phosphoribosyltransferase OS=Homo sapiens GN=NAMPT PE=1 SV=1	0.861747	-3.01978	0.695722	0.230317			3.12	0.65	0.012745	1	1	1	2	2	2	0	0	0	0	0	0	1	1	1	1	1	1	0	0	0	10	8	8	7	7	7	5	4	4	7	6	6	3	3	3	15.81	20.88
FLNB_HUMAN	O75369	Filamin-B OS=Homo sapiens GN=FLNB PE=1 SV=2	-0.0366669	0.0699997	0.98445	0.910052			5.52	0.79	0.002696	48	43	38	80	63	57	67	57	50	52	49	44	45	43	38	87	66	60	40	38	33	70	58	52	40	38	35	29	27	25	42	40	36	22	22	21	20.53	24.71
RAC2_HUMAN	P15153	Ras-related C3 botulinum toxin substrate 2 OS=Homo sapiens GN=RAC2 PE=1 SV=1	0.00333341	-3.51058	0.998729	0.219507			3.13	0.51	0.002504	1	1	0	1	1	0	2	2	0	1	1	0	1	1	0	2	2	0	0	0	0	2	2	0	1	1	0	1	1	0	2	2	0	1	1	0	19.78	23.8
SYWC_HUMAN	P23381	Tryptophan--tRNA ligase, cytoplasmic OS=Homo sapiens GN=WARS PE=1 SV=2	0.533333	-1.47667	0.726795	0.12286			3.41	0.75	0.033046	4	4	4	3	3	3	4	4	4	1	1	1	2	2	2	4	4	4	3	3	3	12	11	11	11	10	10	9	8	8	12	12	12	4	4	4	19.77	21.07
SPEE_HUMAN	P19623	Spermidine synthase OS=Homo sapiens GN=SRM PE=1 SV=1	1.09	-4.09061	0.512738	0.106072			3.48	0.66	0.029827	6	6	6	3	3	3	6	6	6	5	5	5	4	4	4	4	4	4	0	0	0	4	4	4	3	3	3	7	7	7	6	6	6	2	2	2	20.07	23.2
LGUL_HUMAN	Q04760	Lactoylglutathione lyase OS=Homo sapiens GN=GLO1 PE=1 SV=4	0.360001	-1.85	0.819474	0.152452			2.56	0.63	0.084975	2	2	2	4	4	4	2	2	2	1	1	1	4	4	4	4	4	4	1	1	1	2	2	2	2	2	2	3	3	3	1	1	1	1	1	1	20.49	23.45
PSD13_HUMAN	Q9UNM6	26S proteasome non-ATPase regulatory subunit 13 OS=Homo sapiens GN=PSMD13 PE=1 SV=2	0.499999	-0.936666	0.747833	0.0581325			3.35	0.73	0.016557	3	3	3	7	4	4	7	7	7	3	3	3	6	6	6	4	4	4	3	3	3	8	8	8	9	9	9	6	6	6	11	10	10	3	3	3	19.34	22.91
MDHC_HUMAN	P40925	Malate dehydrogenase, cytoplasmic OS=Homo sapiens GN=MDH1 PE=1 SV=4	0.666666	-1.36	0.711802	0.146558			3.32	0.74	0.01336	8	7	7	9	7	7	6	5	5	6	5	5	5	4	4	9	7	7	4	3	3	8	5	5	6	5	5	7	5	5	9	6	6	1	1	1	21.69	24.71
UBA1_HUMAN	P22314	Ubiquitin-like modifier-activating enzyme 1 OS=Homo sapiens GN=UBA1 PE=1 SV=3	1.08	-0.216667	0.573762	0.781787			5.46	0.79	0.000197	15	13	13	19	18	18	13	11	11	12	11	11	8	6	6	19	17	17	12	11	11	20	18	18	19	16	16	14	12	12	19	16	16	7	6	6	21.4	24.65
IF6_HUMAN	P56537	Eukaryotic translation initiation factor 6 OS=Homo sapiens GN=EIF6 PE=1 SV=1	0.54	-0.293332	0.688801	0.745993			5.04	0.79	0.003668	7	4	4	6	4	4	8	5	5	5	3	3	7	4	4	6	5	5	4	4	4	7	5	5	9	4	4	7	4	4	7	5	5	1	1	1	22.96	25.75
CDK12_HUMAN	Q9NYV4	Cyclin-dependent kinase 12 OS=Homo sapiens GN=CDK12 PE=1 SV=2	0.313333	-0.993333	0.789559	0.0601315			3.66	0.65	0.009716	3	1	0	4	3	2	3	2	1	3	1	0	3	2	1	5	3	1	4	1	0	4	1	0	5	2	1	4	1	0	4	1	0	2	1	0	20.69	22.8
ACLY_HUMAN	P53396	ATP-citrate synthase OS=Homo sapiens GN=ACLY PE=1 SV=3	1.05667	-0.336666	0.582278	0.582312			5.94	0.72	0.002882	7	7	7	13	11	11	9	9	9	5	5	5	4	4	4	11	11	11	11	9	9	22	20	20	21	18	18	12	11	11	14	13	13	6	6	6	19.92	23.62
NUDT5_HUMAN	Q9UKK9	ADP-sugar pyrophosphatase OS=Homo sapiens GN=NUDT5 PE=1 SV=1	0.916667	-2.07333	0.639602	0.227319			3.62	0.66	0.026959	4	3	3	6	5	5	6	5	5	2	2	2	3	3	3	5	5	5	1	1	1	4	4	4	1	1	1	5	4	4	2	2	2	1	1	1	20.15	24.03
ANM8_HUMAN	Q9NR22	Protein arginine N-methyltransferase 8 OS=Homo sapiens GN=PRMT8 PE=1 SV=2	-0.0299994	-0.746666	0.984756	0.360498			3.24	0.55	0.063891	1	1	0	2	2	0	2	2	0	1	1	0	2	2	0	2	2	0	1	1	0	3	2	0	4	3	0	1	1	0	3	2	0	2	2	0	19.26	22.86
XPO2_HUMAN	P55060	Exportin-2 OS=Homo sapiens GN=CSE1L PE=1 SV=3	0.0100002	-0.0766665	0.994705	0.919278			5.03	0.69	0.001467	9	7	7	12	12	12	6	6	6	9	9	9	4	4	4	10	10	10	17	15	15	19	17	17	13	12	12	18	13	13	15	11	11	9	9	9	20.43	23.43
UBC12_HUMAN	P61081	NEDD8-conjugating enzyme Ubc12 OS=Homo sapiens GN=UBE2M PE=1 SV=1	0.543333	-1.34333	0.702707	0.205073			2.07	0.58	0.001296	3	3	3	4	4	4	3	3	3	3	3	3	4	4	4	3	3	3	2	2	2	5	5	5	4	4	4	3	3	3	4	4	4	1	1	1	20.76	23.64
NUDC_HUMAN	Q9Y266	Nuclear migration protein nudC OS=Homo sapiens GN=NUDC PE=1 SV=1	0.18	-0.87	0.863869	0.209112			4.28	0.74	0.001914	4	3	3	3	3	3	2	2	2	4	3	3	4	3	3	4	4	4	5	5	5	12	11	11	12	9	9	10	9	9	11	11	11	2	2	2	21.33	23.34
BRX1_HUMAN	Q8TDN6	Ribosome biogenesis protein BRX1 homolog OS=Homo sapiens GN=BRIX1 PE=1 SV=2	0.663333	-0.0266666	0.630633	0.968844			3.48	0.73	0.012622	3	3	3	7	6	6	6	4	4	6	4	4	6	3	3	5	5	5	3	3	3	6	6	6	5	5	5	4	4	4	5	5	5	2	2	2	21.34	24.22
HNRPR_HUMAN	O43390	Heterogeneous nuclear ribonucleoprotein R OS=Homo sapiens GN=HNRNPR PE=1 SV=1	0.323333	0.196667	0.789339	0.649813			4.86	0.72	0.019035	14	13	10	11	11	9	11	9	7	13	12	11	14	13	11	11	11	9	14	10	8	10	10	8	12	11	9	12	7	5	12	8	5	3	3	1	23.14	25.61
H11_HUMAN	Q02539	Histone H1.1 OS=Homo sapiens GN=HIST1H1A PE=1 SV=3	-3.81976	-4.85884	0.135408	0.171413			3.63	0.65	0.05903	1	1	0	0	0	0	1	1	0	1	1	0	1	1	0	2	2	0	0	0	0	0	0	0	0	0	0	2	2	0	0	0	0	1	1	0	18.6	15.2607
EIF3C_HUMAN	Q99613	Eukaryotic translation initiation factor 3 subunit C OS=Homo sapiens GN=EIF3C PE=1 SV=1	0.826668	0.180001	0.609454	0.687637			4.54	0.75	0.000531	18	14	14	18	13	13	19	12	12	14	12	12	9	7	7	19	15	15	19	16	16	17	15	15	14	12	12	16	12	12	16	13	13	6	6	6	22.54	25.54
SYNC_HUMAN	O43776	Asparagine--tRNA ligase, cytoplasmic OS=Homo sapiens GN=NARS PE=1 SV=1	-0.756667	-0.816667	0.636509	0.117261			3.79	0.73	0.04245	1	1	1	2	2	2	1	1	1	2	2	2	3	3	3	1	1	1	11	9	9	4	4	4	11	8	8	6	6	6	7	7	7	2	2	2	17.09	21.73
UB2V2_HUMAN	Q15819	Ubiquitin-conjugating enzyme E2 variant 2 OS=Homo sapiens GN=UBE2V2 PE=1 SV=4	0.230001	-1.98333	0.888888	0.096557			2.46	0.57	0.010475	2	2	1	1	1	0	2	2	1	1	1	0	2	2	0	2	2	0	1	1	0	2	2	0	1	1	0	1	1	0	1	1	0	1	1	0	18.9	22.86
MATR3_HUMAN	P43243	Matrin-3 OS=Homo sapiens GN=MATR3 PE=1 SV=2	1.30667	0.496667	0.34089	0.327324			4.35	0.78	0.02027	20	17	17	14	12	12	15	13	13	8	8	8	8	7	7	14	13	13	18	14	14	24	18	18	17	14	14	16	13	13	13	9	9	7	7	7	24.06	24.52
NOP16_HUMAN	Q9Y3C1	Nucleolar protein 16 OS=Homo sapiens GN=NOP16 PE=1 SV=2	0.643333	-1.08667	0.727811	0.120959			5.04	0.75	0.02915	4	4	4	5	5	5	10	9	9	5	5	5	3	3	3	11	9	9	6	5	5	5	4	4	7	5	5	8	7	7	6	5	5	1	1	1	20.69	24.31
CDK13_HUMAN	Q14004	Cyclin-dependent kinase 13 OS=Homo sapiens GN=CDK13 PE=1 SV=2	0.3	-1.00333	0.795505	0.0602655		Q14004	2.29	0.54	0.009716	3	1	0	2	1	0	2	1	0	3	1	0	2	1	0	4	2	0	4	1	0	4	1	0	4	1	0	4	1	0	4	1	0	2	1	0	20.58	22.6
CALM_HUMAN	P62158	Calmodulin OS=Homo sapiens GN=CALM1 PE=1 SV=2	0.506666	-1.15	0.826749	0.22757			4.99	0.78	0.011613	5	5	5	14	7	7	12	7	6	7	5	5	7	5	5	17	9	8	2	2	2	3	3	3	3	3	3	4	4	4	3	3	3	1	1	1	21.97	27.37
DDX47_HUMAN	Q9H0S4	Probable ATP-dependent RNA helicase DDX47 OS=Homo sapiens GN=DDX47 PE=1 SV=1	0.733333	-0.699999	0.670149	0.185015			4.28	0.74	0.010282	4	4	4	5	5	5	5	5	5	3	3	3	3	3	3	6	6	6	9	8	8	11	10	10	13	12	12	11	11	11	10	9	9	3	3	3	20.05	23.49
NIP7_HUMAN	Q9Y221	60S ribosome subunit biogenesis protein NIP7 homolog OS=Homo sapiens GN=NIP7 PE=1 SV=1	2.16872	-2.03333	0.46595	0.0642104			3.3	0.65	0.091196	1	1	1	2	1	1	1	1	1	0	0	0	0	0	0	1	1	1	2	2	2	2	2	2	4	3	3	2	2	2	3	2	2	1	1	1	17.49	22.74
RCC2_HUMAN	Q9P258	Protein RCC2 OS=Homo sapiens GN=RCC2 PE=1 SV=2	-0.0266666	-0.393333	0.981398	0.219358			4.27	0.75	0.018345	8	8	8	5	5	5	6	5	5	4	4	4	6	6	6	7	7	7	10	9	9	15	11	11	19	12	12	14	11	11	14	10	10	5	5	5	21.52	23.84
PDC10_HUMAN	Q9BUL8	Programmed cell death protein 10 OS=Homo sapiens GN=PDCD10 PE=1 SV=1	0.423333	-1.98	0.778051	0.0823856			2.62	0.53	0.015495	2	2	2	2	2	2	2	2	2	2	2	2	3	3	3	2	2	2	1	1	1	3	3	3	2	2	2	1	1	1	3	3	3	2	2	2	19.3	22.77
EFTU_HUMAN	P49411	Elongation factor Tu, mitochondrial OS=Homo sapiens GN=TUFM PE=1 SV=2	2.73234	0.583333	0.62359	0.518728			5.42	0.74	0.005381	0	0	0	53	26	26	8	7	7	0	0	0	0	0	0	16	13	13	8	8	8	13	11	11	17	14	14	6	6	6	6	6	6	3	3	3	15.7777	29.43
TRFL_HUMAN	P02788	Lactotransferrin OS=Homo sapiens GN=LTF PE=1 SV=6	0	-2.13	1	0.261299			1.92	0.6	0.046815	0	0	0	0	0	0	0	0	0	0	0	0	0	0	0	0	0	0	1	1	1	1	1	1	1	1	1	2	2	2	2	2	2	1	1	1	17.6154	16.1135
CH10_HUMAN	P61604	10 kDa heat shock protein, mitochondrial OS=Homo sapiens GN=HSPE1 PE=1 SV=2	2.06623	-2.91196	0.732942	0.337682			3.55	0.71	0.082501	0	0	0	29	10	10	6	3	3	0	0	0	0	0	0	11	7	7	0	0	0	3	3	3	3	3	3	3	3	3	2	2	2	1	1	1	15.2918	30.7
DDX3Y_HUMAN	O15523	ATP-dependent RNA helicase DDX3Y OS=Homo sapiens GN=DDX3Y PE=1 SV=2	0.386667	0.473333	0.761317	0.226317			6.23	0.67	0.013957	12	10	0	13	11	0	17	12	0	15	12	0	11	9	0	14	11	0	15	9	0	13	10	0	20	15	0	12	9	0	10	8	0	4	4	0	22.78	25.82
H14_HUMAN	P10412	Histone H1.4 OS=Homo sapiens GN=HIST1H1E PE=1 SV=2	-4.09223	-3.47608	0.152209	0.266085			3.63	0.67	0.05903	1	1	0	0	0	0	1	1	0	2	2	0	1	1	0	8	6	0	0	0	0	0	0	0	0	0	0	3	3	0	0	0	0	1	1	0	18.48	16.8333
UGDH_HUMAN	O60701	UDP-glucose 6-dehydrogenase OS=Homo sapiens GN=UGDH PE=1 SV=1	1.18667	-1.26	0.494295	0.119376			3.68	0.76	0.004271	4	4	4	6	6	6	4	4	4	2	2	2	2	2	2	4	4	4	5	4	4	10	9	9	6	6	6	8	8	8	8	7	7	4	4	4	19.16	22.57
PABP4_HUMAN	Q13310	Polyadenylate-binding protein 4 OS=Homo sapiens GN=PABPC4 PE=1 SV=1	0.18	-0.0800006	0.912935	0.871166			4.52	0.73	0.005474	15	14	11	22	18	11	13	11	7	13	12	8	12	11	7	18	17	11	13	11	7	11	10	7	15	13	9	12	10	7	9	8	6	4	4	2	22.68	26.55
PSB3_HUMAN	P49720	Proteasome subunit beta type-3 OS=Homo sapiens GN=PSMB3 PE=1 SV=2	0.92	-2.74	0.648369	0.139635			3.49	0.7	0.039502	2	2	2	4	4	4	3	3	3	1	1	1	2	2	2	3	3	3	1	1	1	3	2	2	3	3	3	6	6	6	4	4	4	1	1	1	19.54	23.28
SMD1_HUMAN	P62314	Small nuclear ribonucleoprotein Sm D1 OS=Homo sapiens GN=SNRPD1 PE=1 SV=1	0.5	-0.903334	0.770495	0.46473			4.98	0.72	0.024838	4	3	3	6	4	4	5	4	4	3	2	2	4	3	3	5	4	4	1	1	1	4	4	4	4	3	3	4	3	3	4	3	3	1	1	1	23.27	26.97
PAP1L_HUMAN	Q4VXU2	Polyadenylate-binding protein 1-like OS=Homo sapiens GN=PABPC1L PE=2 SV=1	0.353333	-0.54	0.811665	0.247428			2.86	0.59	0.028485	6	4	0	5	4	0	6	3	0	5	3	0	4	3	0	5	4	0	5	4	0	5	4	0	5	3	0	6	3	0	7	3	0	3	3	0	22.05	25.35
AATC_HUMAN	P17174	Aspartate aminotransferase, cytoplasmic OS=Homo sapiens GN=GOT1 PE=1 SV=3	1.2329	-3.17827	0.143875	0.271525			2.76	0.67	0.023991	1	1	1	0	0	0	1	1	1	0	0	0	0	0	0	0	0	0	0	0	0	7	7	7	6	6	6	6	5	5	6	5	5	3	3	3	18.13	16.3027
ADRM1_HUMAN	Q16186	Proteasomal ubiquitin receptor ADRM1 OS=Homo sapiens GN=ADRM1 PE=1 SV=2	2.72298	-2.34667	0.124479	0.129977			1.92	0.54	0.122116	0	0	0	1	1	1	1	1	1	0	0	0	0	0	0	0	0	0	2	2	2	1	1	1	1	1	1	2	2	2	2	2	2	1	1	1	15.9971	18.37
DDX21_HUMAN	Q9NR30	Nucleolar RNA helicase 2 OS=Homo sapiens GN=DDX21 PE=1 SV=5	0.153333	0.43	0.919568	0.439644			4.33	0.75	0.009118	20	18	16	20	16	14	27	18	17	18	16	15	15	14	13	28	22	20	22	20	19	16	15	14	19	18	17	15	14	13	14	14	13	4	4	4	23.09	25.99
RL32_HUMAN	P62910	60S ribosomal protein L32 OS=Homo sapiens GN=RPL32 PE=1 SV=2	0.783333	-0.566667	0.730674	0.520866			5.08	0.69	0.001	11	9	9	16	12	12	16	9	9	12	8	8	9	6	6	17	10	10	8	5	5	9	6	6	12	8	8	9	7	7	8	7	7	2	2	2	22.69	27.55
ERP29_HUMAN	P30040	Endoplasmic reticulum resident protein 29 OS=Homo sapiens GN=ERP29 PE=1 SV=4	0.356666	-2.72516	0.875636	0.113062			3.65	0.76	0.015384	5	5	5	9	7	7	12	8	8	10	8	8	6	6	6	13	8	8	0	0	0	7	7	7	3	3	3	6	6	6	6	6	6	2	2	2	20.65	25.74
NOP56_HUMAN	O00567	Nucleolar protein 56 OS=Homo sapiens GN=NOP56 PE=1 SV=4	0.533333	0.083334	0.723898	0.874921			3.54	0.73	0.013781	14	14	14	13	11	11	14	12	12	11	11	11	11	10	10	14	13	13	10	9	9	14	12	12	14	12	12	15	9	9	8	7	7	4	4	4	22.4	25.58
HNRDL_HUMAN	O14979	Heterogeneous nuclear ribonucleoprotein D-like OS=Homo sapiens GN=HNRPDL PE=1 SV=3	0.810001	-0.203334	0.585339	0.571649			3.45	0.66	0.030109	6	5	4	9	6	5	12	9	8	8	7	6	6	5	4	9	7	6	6	4	3	5	5	4	8	8	6	5	5	4	7	6	4	3	3	2	21.72	25.06
PRPS3_HUMAN	P21108	Ribose-phosphate pyrophosphokinase 3 OS=Homo sapiens GN=PRPS1L1 PE=1 SV=2	1.36	-1.25667	0.390875	0.109464			4.12	0.74	0.004617	3	3	0	3	3	0	4	3	0	1	1	0	4	3	0	3	2	0	2	2	0	3	2	0	3	2	0	4	2	0	5	3	0	1	1	0	21.19	23.99
H12_HUMAN	P16403	Histone H1.2 OS=Homo sapiens GN=HIST1H1C PE=1 SV=2	-4.62908	-3.54623	0.1405	0.324081			3.63	0.67	0.05903	1	1	0	0	0	0	1	1	0	2	2	0	1	1	0	8	6	0	0	0	0	0	0	0	0	0	0	3	3	0	0	0	0	1	1	0	18.36	15.0928
H13_HUMAN	P16402	Histone H1.3 OS=Homo sapiens GN=HIST1H1D PE=1 SV=2	-4.26824	-4.70689	0.146699	0.159743			3.63	0.67	0.05903	1	1	0	0	0	0	1	1	0	2	2	0	1	1	0	8	6	0	0	0	0	0	0	0	0	0	0	3	3	0	0	0	0	1	1	0	18.36	16.1753
NAT10_HUMAN	Q9H0A0	N-acetyltransferase 10 OS=Homo sapiens GN=NAT10 PE=1 SV=2	1.38	0.136667	0.502731	0.783768			4.28	0.73	0.006828	13	12	12	14	13	13	11	10	10	7	7	7	3	3	3	19	18	18	16	15	15	17	16	16	15	14	14	13	12	12	11	11	11	6	6	6	21.15	24.04
TIPRL_HUMAN	O75663	TIP41-like protein OS=Homo sapiens GN=TIPRL PE=1 SV=2	-2.01	-2.54333	0.254362	0.0509277			4.53	0.72	0.005882	8	5	5	2	2	2	3	2	2	37	8	8	15	6	6	2	2	2	4	2	2	3	2	2	2	2	2	4	3	3	3	2	2	3	1	1	21	20.81
IDHC_HUMAN	O75874	Isocitrate dehydrogenase [NADP] cytoplasmic OS=Homo sapiens GN=IDH1 PE=1 SV=2	0.116666	-0.87	0.943916	0.13674			3.32	0.73	0.014954	3	3	3	3	3	3	2	2	2	3	3	2	2	2	2	3	3	2	6	6	5	12	11	10	11	10	9	10	8	7	11	10	9	3	3	3	18.68	21.73
SYTC_HUMAN	P26639	Threonine--tRNA ligase, cytoplasmic OS=Homo sapiens GN=TARS PE=1 SV=3	0.396666	-0.623333	0.785156	0.441506			3.56	0.71	0.002305	8	7	7	6	6	5	7	7	6	4	4	4	10	9	9	11	10	8	7	6	5	16	14	13	11	10	9	13	11	10	12	9	8	4	4	3	20.97	22.35
HNRPQ_HUMAN	O60506	Heterogeneous nuclear ribonucleoprotein Q OS=Homo sapiens GN=SYNCRIP PE=1 SV=2	0.559999	0.246668	0.669401	0.620795			4.55	0.74	0.016587	11	10	7	10	9	7	11	10	8	7	7	6	11	10	8	8	7	5	9	7	5	10	7	5	10	8	6	12	8	6	10	7	4	3	3	1	22.89	25.47
RIFK_HUMAN	Q969G6	Riboflavin kinase OS=Homo sapiens GN=RFK PE=1 SV=2	0.76	-1.88333	0.542687	0.0656351			2.13	0.6	0.108969	1	1	1	1	1	1	1	1	1	1	1	1	1	1	1	1	1	1	1	1	1	1	1	1	1	1	1	2	2	2	1	1	1	1	1	1	19.38	21.89
H2AY_HUMAN	O75367	Core histone macro-H2A.1 OS=Homo sapiens GN=H2AFY PE=1 SV=4	-3.42405	-4.72049	0.199346	0.166019			2.26	0.41	0.088656	0	0	0	0	0	0	0	0	0	0	0	0	0	0	0	2	2	1	0	0	0	0	0	0	0	0	0	2	2	2	0	0	0	2	2	1	16.4222	14.3416
ACTN4_HUMAN	O43707	Alpha-actinin-4 OS=Homo sapiens GN=ACTN4 PE=1 SV=2	-0.579999	-0.126666	0.826159	0.836783			4.93	0.77	0.006223	10	10	4	24	21	9	5	5	2	12	12	5	8	8	4	35	31	15	21	15	10	24	19	10	17	16	8	19	16	10	16	14	8	7	7	2	20.27	25.04
MRT4_HUMAN	Q9UKD2	mRNA turnover protein 4 homolog OS=Homo sapiens GN=MRTO4 PE=1 SV=2	0.0233339	-0.550001	0.988482	0.271996			3.64	0.66	0.021025	6	6	6	6	5	5	12	9	9	9	8	8	8	7	7	11	8	8	11	9	9	14	10	10	13	12	12	12	9	9	13	11	11	1	1	1	21.08	24.14
SRC8_HUMAN	Q14247	Src substrate cortactin OS=Homo sapiens GN=CTTN PE=1 SV=2	0.250001	-0.103334	0.85963	0.803499			3.88	0.69	0.005859	6	6	6	6	5	5	4	4	4	6	6	6	5	5	5	5	4	4	10	9	9	11	8	8	11	10	10	10	9	9	11	10	10	3	3	3	20.48	23.44
EIF3A_HUMAN	Q14152	Eukaryotic translation initiation factor 3 subunit A OS=Homo sapiens GN=EIF3A PE=1 SV=1	-0.386667	-0.276667	0.844566	0.512412			5.46	0.74	0.002542	40	37	37	54	36	36	34	29	29	43	38	38	47	39	39	84	63	63	36	34	34	39	37	37	33	31	31	38	35	35	35	33	33	10	9	9	21.15	25.41
NQO1_HUMAN	P15559	NAD(P)H dehydrogenase [quinone] 1 OS=Homo sapiens GN=NQO1 PE=1 SV=1	-0.393333	-1.86667	0.806318	0.110507			3.51	0.68	0.000634	3	3	3	2	2	2	3	3	3	3	3	3	4	3	3	6	5	5	2	2	2	6	5	5	3	3	3	5	4	4	6	5	5	1	1	1	19.67	22.54
TPM4_HUMAN	P67936	Tropomyosin alpha-4 chain OS=Homo sapiens GN=TPM4 PE=1 SV=3	0.0733337	-0.526667	0.972383	0.728263			4.89	0.74	0.013531	18	14	7	22	13	5	21	15	7	24	17	9	24	15	6	29	18	10	4	3	0	9	7	2	16	14	6	12	12	5	3	3	0	2	2	0	22.25	26.87
RIR1_HUMAN	P23921	Ribonucleoside-diphosphate reductase large subunit OS=Homo sapiens GN=RRM1 PE=1 SV=1	0.363333	0.11	0.807523	0.825721			5.37	0.67	0.000663	9	7	7	9	6	6	8	7	7	5	5	5	8	6	6	13	10	10	7	7	7	15	12	12	10	10	10	6	6	6	9	7	7	3	3	3	21.03	23.76
ZN716_HUMAN	A6NP11	Zinc finger protein 716 OS=Homo sapiens GN=ZNF716 PE=2 SV=4	-0.522555	-3.48527	0.775863	0.243453			1.25	0.39	0.050691	0	0	0	0	0	0	0	0	0	0	0	0	0	0	0	2	1	1	0	0	0	0	0	0	0	0	0	2	1	1	0	0	0	2	1	1	15.9211	17.2665
ACTN1_HUMAN	P12814	Alpha-actinin-1 OS=Homo sapiens GN=ACTN1 PE=1 SV=2	-0.383333	-0.0666676	0.876336	0.909773			5.57	0.77	0.006223	13	12	6	26	23	9	7	7	4	15	15	7	12	10	6	38	33	16	14	10	5	20	16	7	15	14	6	16	13	6	14	11	5	6	6	1	20.69	25.33
RPAB3_HUMAN	P52434	DNA-directed RNA polymerases I, II, and III subunit RPABC3 OS=Homo sapiens GN=POLR2H PE=1 SV=4	0.163333	-1.14667	0.861511	0.149156			3.11	0.68	0.006423	3	3	3	2	2	2	4	4	4	4	4	4	4	4	4	3	3	3	2	2	2	4	4	4	3	3	3	2	2	2	4	4	4	1	1	1	20.58	22.35
CLH2_HUMAN	P53675	Clathrin heavy chain 2 OS=Homo sapiens GN=CLTCL1 PE=1 SV=2	-0.553333	-0.0700003	0.764215	0.792986			4.3	0.73	0.01671	9	8	0	15	12	0	9	8	0	9	7	0	11	10	0	14	13	0	13	11	0	9	8	0	13	11	0	12	9	0	12	10	0	6	6	0	19.48	23.72
DESP_HUMAN	P15924	Desmoplakin OS=Homo sapiens GN=DSP PE=1 SV=3	0.263334	0.82	0.865512	0.271495			6.59	0.81	0.000347	106	85	85	132	105	105	166	118	118	92	77	77	131	101	101	137	109	109	140	83	83	55	49	49	68	55	55	44	33	33	48	37	37	21	18	18	22.17	25.91
PRP4_HUMAN	O43172	U4/U6 small nuclear ribonucleoprotein Prp4 OS=Homo sapiens GN=PRPF4 PE=1 SV=2	-0.0399996	-0.43	0.969366	0.375674			3.93	0.73	0.017371	4	4	4	4	4	4	4	4	4	6	5	5	7	7	7	5	5	5	10	8	8	12	10	10	13	11	11	7	7	7	13	10	10	3	2	2	19.85	22.31
MANF_HUMAN	P55145	Mesencephalic astrocyte-derived neurotrophic factor OS=Homo sapiens GN=MANF PE=1 SV=3	1.63555	-3.38361	0.541747	0.0863024			3.93	0.62	0.01475	1	1	1	3	3	3	4	4	4	1	1	1	0	0	0	3	3	3	0	0	0	1	1	1	1	1	1	2	1	1	2	1	1	1	1	1	18.9	23.51
TPM3_HUMAN	P06753	Tropomyosin alpha-3 chain OS=Homo sapiens GN=TPM3 PE=1 SV=1	0.096667	-0.383333	0.962774	0.774581			4.32	0.71	0.012942	15	11	5	22	12	4	21	13	5	20	11	4	23	13	4	25	14	5	5	4	1	10	8	4	13	9	2	9	9	3	4	4	1	2	2	0	22.22	26.54
TPM2_HUMAN	P07951	Tropomyosin beta chain OS=Homo sapiens GN=TPM2 PE=1 SV=1	0.153332	-0.483334	0.943901	0.751251			3.56	0.71	0.010478	9	7	1	17	11	4	12	8	1	12	8	1	14	9	1	19	11	4	3	2	0	7	5	1	9	8	1	7	7	1	3	3	1	2	2	0	21.39	26.23
TPM1_HUMAN	P09493	Tropomyosin alpha-1 chain OS=Homo sapiens GN=TPM1 PE=1 SV=2	-0.156667	-0.426666	0.944377	0.792496			4.27	0.71	0.013531	6	5	0	14	8	3	10	7	1	12	9	3	11	7	0	17	10	4	3	2	0	5	4	1	8	7	1	5	5	0	2	2	0	2	2	0	20.96	25.96
TFR1_HUMAN	P02786	Transferrin receptor protein 1 OS=Homo sapiens GN=TFRC PE=1 SV=2	0.35	-0.136667	0.897009	0.889544			4.9	0.82	0.005495	7	7	7	22	19	19	11	10	10	7	7	7	7	7	7	21	17	17	9	8	8	17	17	17	8	8	8	9	9	9	9	9	9	4	4	4	19.22	25.78
PK1IP_HUMAN	Q9NWT1	p21-activated protein kinase-interacting protein 1 OS=Homo sapiens GN=PAK1IP1 PE=1 SV=2	-1.12736	-0.85	0.582546	0.0933212			3.01	0.63	0.068117	1	1	1	1	1	1	0	0	0	2	2	2	1	1	1	3	3	3	2	2	2	5	5	5	3	3	3	2	2	2	5	5	5	2	2	2	18.5	21.76
SYHC_HUMAN	P12081	Histidine--tRNA ligase, cytoplasmic OS=Homo sapiens GN=HARS PE=1 SV=2	0.37	-0.976667	0.813259	0.121602			4.57	0.7	0.001488	3	3	1	3	3	2	4	4	3	4	4	4	4	4	3	4	4	3	5	5	2	8	8	4	5	5	2	5	5	3	8	8	6	3	3	1	19.19	22.94
ROAA_HUMAN	Q99729	Heterogeneous nuclear ribonucleoprotein A/B OS=Homo sapiens GN=HNRNPAB PE=1 SV=2	0.76	0.223333	0.603674	0.840785			3.72	0.77	0.022418	7	4	4	13	8	8	11	6	6	7	5	5	6	4	4	11	7	7	5	4	4	5	5	5	5	4	4	4	4	4	8	7	7	1	1	1	21.56	24.92
CISY_HUMAN	O75390	Citrate synthase, mitochondrial OS=Homo sapiens GN=CS PE=1 SV=2	2.07319	0.280001	0.734031	0.784582			5.95	0.71	0.004924	0	0	0	28	15	15	2	2	2	0	0	0	0	0	0	10	6	6	4	3	3	12	7	7	10	7	7	6	5	5	4	3	3	2	2	2	12.982	28.78
RL19_HUMAN	P84098	60S ribosomal protein L19 OS=Homo sapiens GN=RPL19 PE=1 SV=1	0.923332	-0.376667	0.717635	0.604291			4.54	0.79	0.004683	7	5	5	12	9	9	10	7	7	6	5	5	6	5	5	10	7	7	5	4	4	6	6	6	5	5	5	7	6	6	6	5	5	1	1	1	21.72	27.33
EIF3D_HUMAN	O15371	Eukaryotic translation initiation factor 3 subunit D OS=Homo sapiens GN=EIF3D PE=1 SV=1	-0.190001	0.0566661	0.895706	0.939376			4.29	0.75	0.008394	7	7	7	12	10	10	11	10	10	11	11	11	12	10	10	12	12	12	7	7	7	9	7	7	9	8	8	9	8	8	7	7	7	2	2	2	22	25.72
MEP50_HUMAN	Q9BQA1	Methylosome protein 50 OS=Homo sapiens GN=WDR77 PE=1 SV=1	0.0799999	-0.516666	0.956321	0.226045			3.01	0.61	0.009143	1	1	1	2	1	1	2	1	1	3	1	1	3	1	1	2	1	1	2	2	2	2	2	2	3	3	3	3	3	3	4	4	4	1	1	1	19.41	22.89
TIF1B_HUMAN	Q13263	Transcription intermediary factor 1-beta OS=Homo sapiens GN=TRIM28 PE=1 SV=5	0.456666	0.646666	0.687424	0.172215			4.43	0.75	0.001148	9	6	6	10	8	8	13	11	11	8	6	6	9	7	7	7	6	6	13	10	9	17	12	11	14	11	11	8	7	7	12	9	9	3	3	3	21.39	23.71
PLST_HUMAN	P13797	Plastin-3 OS=Homo sapiens GN=PLS3 PE=1 SV=4	0.623333	0.586666	0.596148	0.315845			4.16	0.73	0.011633	13	11	9	9	9	7	10	10	8	7	7	5	10	10	8	8	8	5	16	15	10	11	11	9	11	11	9	10	9	7	9	9	7	4	4	4	21.52	23.56
ZN207_HUMAN	O43670	Zinc finger protein 207 OS=Homo sapiens GN=ZNF207 PE=1 SV=1	0.48	-0.723333	0.803708	0.198862			3.12	0.69	0.01137	1	1	1	2	2	2	2	2	2	1	1	1	1	1	1	2	2	2	4	3	3	3	3	3	5	3	3	2	2	2	4	3	3	1	1	1	20.06	24.68
TADBP_HUMAN	Q13148	TAR DNA-binding protein 43 OS=Homo sapiens GN=TARDBP PE=1 SV=1	0.653333	-0.383334	0.751491	0.769574			3.79	0.78	0.027417	3	3	3	3	3	3	4	4	4	3	3	3	3	3	3	4	3	3	2	2	2	2	2	2	1	1	1	2	2	2	2	2	2	1	1	1	20.72	23
PABP3_HUMAN	Q9H361	Polyadenylate-binding protein 3 OS=Homo sapiens GN=PABPC3 PE=1 SV=2	0.16	0.403333	0.906693	0.366761			5.71	0.73	0.014102	10	9	0	17	12	0	12	8	0	11	8	0	15	10	0	17	13	0	8	5	0	13	10	0	11	8	0	8	7	0	10	7	0	4	4	0	23.23	26.11
FUBP2_HUMAN	Q92945	Far upstream element-binding protein 2 OS=Homo sapiens GN=KHSRP PE=1 SV=4	0.0266673	-0.29	0.97864	0.451326			4.88	0.71	0.002347	12	12	11	7	7	7	11	11	10	8	8	7	7	7	7	12	12	12	10	10	9	11	11	11	13	12	12	8	8	8	14	11	11	4	4	4	21.77	22.99
EIF3G_HUMAN	O75821	Eukaryotic translation initiation factor 3 subunit G OS=Homo sapiens GN=EIF3G PE=1 SV=2	-0.126667	-1.23667	0.930647	0.169472			3.8	0.78	0.007734	8	6	6	7	5	5	6	4	4	9	7	7	7	5	5	8	6	6	6	5	5	7	6	6	8	7	7	8	6	6	13	10	10	2	1	1	21.91	25.25
SNX12_HUMAN	Q9UMY4	Sorting nexin-12 OS=Homo sapiens GN=SNX12 PE=1 SV=3	0.0900008	-1.89489	0.947267	0.543239			2.3	0.55	0.019676	1	1	1	1	1	1	1	1	1	2	2	1	2	2	1	1	1	1	0	0	0	2	2	1	1	1	0	2	2	1	0	0	0	1	1	0	18.6	21.73
AK1C3_HUMAN	P42330	Aldo-keto reductase family 1 member C3 OS=Homo sapiens GN=AKR1C3 PE=1 SV=4	1.56	-1.06667	0.286099	0.240173			3.68	0.7	0.016702	4	4	0	2	2	0	2	2	0	2	2	0	1	1	0	2	2	0	2	2	0	5	5	1	6	5	1	3	3	0	4	4	1	1	1	0	19.28	22.38
AK1C2_HUMAN	P52895	Aldo-keto reductase family 1 member C2 OS=Homo sapiens GN=AKR1C2 PE=1 SV=3	0.426666	-1.03333	0.711924	0.270276			2.25	0.63	0.016828	3	3	0	1	1	0	1	1	0	2	2	0	1	1	0	2	2	0	1	1	0	2	2	0	3	2	0	1	1	0	1	1	0	1	1	0	19.23	20.91
STK25_HUMAN	O00506	Serine/threonine-protein kinase 25 OS=Homo sapiens GN=STK25 PE=1 SV=1	-0.614254	-1.00333	0.824664	0.487292			2.91	0.56	0.050172	0	0	0	1	1	0	0	0	0	1	1	0	0	0	0	1	1	0	1	1	0	3	3	0	2	2	0	2	2	0	1	1	0	2	2	0	14.4347	21.37
SEPT7_HUMAN	Q16181	Septin-7 OS=Homo sapiens GN=SEPT7 PE=1 SV=2	0.303333	-1.12	0.766301	0.0832467			3.29	0.68	0.013976	3	3	2	3	2	1	2	1	0	1	1	0	4	3	2	4	3	2	4	3	2	9	8	7	8	7	6	7	6	5	9	8	7	4	3	2	19.47	21.41
SAR1A_HUMAN	Q9NR31	GTP-binding protein SAR1a OS=Homo sapiens GN=SAR1A PE=1 SV=1	1	-1.29	0.553458	0.0892643			3.1	0.67	0.028881	5	5	2	6	6	4	6	6	3	5	5	2	6	5	2	5	5	3	4	4	2	4	4	1	4	4	1	5	5	2	5	5	2	1	1	0	21.39	24.95
K6PP_HUMAN	Q01813	6-phosphofructokinase type C OS=Homo sapiens GN=PFKP PE=1 SV=2	0.833333	-0.46	0.495895	0.61058			4.51	0.74	0.009635	10	9	8	10	10	8	7	6	5	5	5	5	7	7	6	6	6	5	6	5	4	16	13	12	9	7	6	9	7	6	10	9	8	3	3	3	20.9	23.59
DUT_HUMAN	P33316	Deoxyuridine 5'-triphosphate nucleotidohydrolase, mitochondrial OS=Homo sapiens GN=DUT PE=1 SV=4	0.233334	-2.77667	0.907715	0.0533312			4.22	0.76	0.060463	3	2	2	4	4	4	3	3	3	1	1	1	1	1	1	4	3	3	1	1	1	2	2	2	1	1	1	3	3	3	3	2	2	1	1	1	18.34	23.35
DHX15_HUMAN	O43143	Putative pre-mRNA-splicing factor ATP-dependent RNA helicase DHX15 OS=Homo sapiens GN=DHX15 PE=1 SV=2	0.456666	0.533334	0.738503	0.13955			5.57	0.71	0.021961	14	13	13	15	15	15	11	10	10	15	15	15	12	12	12	14	13	13	16	14	13	13	12	11	14	14	13	11	10	9	15	14	13	4	4	4	22.18	25.24
PRP8_HUMAN	Q6P2Q9	Pre-mRNA-processing-splicing factor 8 OS=Homo sapiens GN=PRPF8 PE=1 SV=2	0.330001	-0.026666	0.840677	0.946961			5.93	0.79	0.000991	41	39	39	60	56	56	57	50	50	35	34	34	34	34	34	56	51	51	24	24	24	37	33	33	38	35	35	25	25	25	32	32	32	13	13	13	20.62	24.37
U520_HUMAN	O75643	U5 small nuclear ribonucleoprotein 200 kDa helicase OS=Homo sapiens GN=SNRNP200 PE=1 SV=2	0.466667	-0.193333	0.768247	0.557451			4.96	0.79	0.003547	32	30	30	48	43	43	53	45	45	31	29	29	26	24	24	47	42	42	24	24	24	24	22	22	33	31	31	26	25	25	20	18	18	11	11	11	20.83	24.25
AK1C1_HUMAN	Q04828	Aldo-keto reductase family 1 member C1 OS=Homo sapiens GN=AKR1C1 PE=1 SV=1	1.55667	-1.07667	0.28555	0.232384			2.96	0.63	0.016702	4	4	0	2	2	0	2	2	0	2	2	0	1	1	0	2	2	0	2	2	0	4	4	0	5	4	0	3	3	0	3	3	0	1	1	0	19.22	22.31
MST4_HUMAN	Q9P289	Serine/threonine-protein kinase MST4 OS=Homo sapiens GN=MST4 PE=1 SV=2	0.222257	-1.22667	0.933401	0.359555			2.91	0.56	0.050172	0	0	0	1	1	0	0	0	0	1	1	0	0	0	0	1	1	0	1	1	0	4	4	0	2	2	0	2	2	0	3	3	1	2	2	0	15.8704	21.31
LAP2B_HUMAN	P42167	Lamina-associated polypeptide 2, isoforms beta/gamma OS=Homo sapiens GN=TMPO PE=1 SV=2	0.193333	-1.11667	0.939639	0.23054			5.54	0.77	0.00272	5	3	0	20	13	5	13	8	3	7	6	1	5	5	2	21	14	6	3	2	1	3	3	2	3	2	1	9	7	1	3	2	1	1	1	0	20.17	26.53
DDX6_HUMAN	P26196	Probable ATP-dependent RNA helicase DDX6 OS=Homo sapiens GN=DDX6 PE=1 SV=2	-0.436666	-0.613333	0.775157	0.168387			7.14	0.77	0.005376	3	3	3	5	5	5	4	4	4	6	6	6	5	5	5	6	5	5	6	6	6	8	8	8	6	6	6	7	7	7	5	5	5	3	3	3	19.79	23.42
FA98B_HUMAN	Q52LJ0	Protein FAM98B OS=Homo sapiens GN=FAM98B PE=1 SV=1	0.790075	-1.18667	0.746067	0.134669			3.67	0.76	0.014635	1	1	1	2	2	1	1	1	0	2	2	2	0	0	0	3	3	1	1	1	1	2	2	2	4	4	4	3	3	3	3	3	3	2	2	2	18.66	22.01
AN32E_HUMAN	Q9BTT0	Acidic leucine-rich nuclear phosphoprotein 32 family member E OS=Homo sapiens GN=ANP32E PE=1 SV=1	0.583334	-2.4887	0.791152	0.344529			3.14	0.68	0.381462	1	1	1	1	1	1	1	1	1	1	1	1	1	1	1	2	2	2	0	0	0	1	1	1	0	0	0	2	2	2	0	0	0	1	1	1	18.44	22.77
VINC_HUMAN	P18206	Vinculin OS=Homo sapiens GN=VCL PE=1 SV=4	1.80667	-0.733334	0.290699	0.513878			4.58	0.76	0.003676	14	14	14	12	12	12	6	6	6	4	4	4	2	2	2	11	8	8	8	8	8	25	25	25	11	11	11	19	19	19	14	14	14	6	6	6	20.4	22.79
PP1G_HUMAN	P36873	Serine/threonine-protein phosphatase PP1-gamma catalytic subunit OS=Homo sapiens GN=PPP1CC PE=1 SV=1	0.983334	1.34667	0.644008	0.0916469			4.88	0.78	0.056026	4	3	1	7	4	1	7	5	1	3	3	1	4	4	2	7	5	1	7	5	2	12	6	2	13	6	2	5	3	1	6	4	1	1	1	1	20.57	25.02
PUR2_HUMAN	P22102	Trifunctional purine biosynthetic protein adenosine-3 OS=Homo sapiens GN=GART PE=1 SV=1	1.68667	-0.326667	0.300951	0.528244			3.7	0.66	0.0188	6	6	6	5	5	5	1	1	1	2	2	2	1	1	1	1	1	1	10	7	7	10	8	8	11	8	8	8	5	5	7	6	6	4	3	3	19.7	22.13
AL9A1_HUMAN	P49189	4-trimethylaminobutyraldehyde dehydrogenase OS=Homo sapiens GN=ALDH9A1 PE=1 SV=3	2.4409	-0.466667	0.35718	0.25131			3.33	0.6	0.009338	2	2	2	5	4	4	3	3	3	0	0	0	1	1	1	2	2	2	4	4	4	7	6	6	7	6	6	6	5	5	5	4	4	2	2	2	19.06	24.06
PABP5_HUMAN	Q96DU9	Polyadenylate-binding protein 5 OS=Homo sapiens GN=PABPC5 PE=1 SV=1	0.4	-0.29	0.782846	0.551074			2.86	0.46	0.028485	3	2	0	2	2	0	2	1	0	2	1	0	1	1	0	2	2	0	3	2	0	3	2	0	2	1	0	3	1	0	3	1	0	1	1	0	21.41	24.42
ZCCHV_HUMAN	Q7Z2W4	Zinc finger CCCH-type antiviral protein 1 OS=Homo sapiens GN=ZC3HAV1 PE=1 SV=3	0.433333	0.116666	0.757875	0.548604			4.16	0.8	0.001694	10	10	9	7	7	6	9	9	8	6	6	6	8	8	8	10	10	10	15	14	13	14	13	12	20	17	16	13	12	12	16	14	13	4	4	4	20.38	22.83
BASI_HUMAN	P35613	Basigin OS=Homo sapiens GN=BSG PE=1 SV=2	2.81799	-1.35	0.544035	0.299014			4.92	0.74	0.029946	1	1	1	14	7	7	8	6	6	1	1	1	0	0	0	9	5	5	1	1	1	6	5	5	4	4	4	3	2	2	3	2	2	1	1	1	16.89	26.88
BPNT1_HUMAN	O95861	3'(2'),5'-bisphosphate nucleotidase 1 OS=Homo sapiens GN=BPNT1 PE=1 SV=1	0.993333	-1.12333	0.227976	0.339676			2.78	0.68	0.043124	3	3	3	2	2	2	4	4	4	2	2	2	2	2	2	2	2	2	1	1	1	3	3	3	3	3	3	2	2	2	1	1	1	2	2	2	19.37	21.47
TBG1_HUMAN	P23258	Tubulin gamma-1 chain OS=Homo sapiens GN=TUBG1 PE=1 SV=2	0.68	-0.54	0.717078	0.113788			4.73	0.69	0.010887	2	2	0	4	4	1	3	3	1	2	2	0	2	2	0	3	3	0	7	7	2	8	7	3	10	10	3	6	6	2	10	9	3	1	1	0	17.4	22.32
TBG2_HUMAN	Q9NRH3	Tubulin gamma-2 chain OS=Homo sapiens GN=TUBG2 PE=1 SV=1	0.186666	-0.819999	0.91154	0.104607			4.73	0.69	0.010887	2	2	0	3	3	0	2	2	0	2	2	0	2	2	0	3	3	0	5	5	0	5	4	0	7	7	0	4	4	0	7	6	0	1	1	0	17.4	21.59
CDK7_HUMAN	P50613	Cyclin-dependent kinase 7 OS=Homo sapiens GN=CDK7 PE=1 SV=1	1.29341	-0.46	0.621971	0.61365			2.34	0.65	0.011528	2	2	2	2	2	1	3	3	2	1	1	1	3	3	2	2	2	1	3	2	1	4	4	3	5	5	4	4	4	3	5	5	4	1	1	1	17.23	21.8
EXOS4_HUMAN	Q9NPD3	Exosome complex component RRP41 OS=Homo sapiens GN=EXOSC4 PE=1 SV=3	-0.0933336	0.743333	0.934922	0.486422			3.74	0.64	0.048025	2	2	2	2	2	2	3	2	2	3	3	3	4	3	3	4	3	3	4	3	3	3	3	3	3	3	3	1	1	1	1	1	1	1	1	1	20.74	23.3
KAD1_HUMAN	P00568	Adenylate kinase isoenzyme 1 OS=Homo sapiens GN=AK1 PE=1 SV=3	-1.28017	-3.56304	0.601748	0.117737			3.03	0.67	0.045443	2	2	2	1	1	0	2	2	2	2	2	2	2	2	2	2	2	2	0	0	0	6	6	5	1	1	1	7	7	6	8	8	7	1	1	1	19.17	13.7295
RFA3_HUMAN	P35244	Replication protein A 14 kDa subunit OS=Homo sapiens GN=RPA3 PE=1 SV=1	1.42803	-4.04164	0.66751	0.147242			3.64	0.57	0.180222	0	0	0	2	2	2	1	1	1	0	0	0	0	0	0	1	1	1	0	0	0	0	0	0	0	0	0	0	0	0	1	1	1	1	1	1	15.1416	23.15
MYH10_HUMAN	P35580	Myosin-10 OS=Homo sapiens GN=MYH10 PE=1 SV=3	0.173333	-0.439999	0.937403	0.541818			4.7	0.78	0.003232	22	16	8	82	65	51	33	28	20	21	18	10	29	24	16	74	60	43	10	8	1	19	13	4	7	5	0	10	9	2	14	10	3	7	5	0	19.96	24.9
SC22B_HUMAN	O75396	Vesicle-trafficking protein SEC22b OS=Homo sapiens GN=SEC22B PE=1 SV=4	-0.263333	-1.51667	0.934139	0.0830404			4.4	0.77	0.000965	2	2	2	9	7	7	7	5	5	6	5	5	5	4	4	7	5	5	2	2	2	2	2	2	1	1	1	3	3	3	2	2	2	1	1	1	18.05	26.43
CADH6_HUMAN	P55285	Cadherin-6 OS=Homo sapiens GN=CDH6 PE=1 SV=1	-0.974536	-3.98206	0.468961	0.110291			1.68	0.4	0.660033	0	0	0	0	0	0	0	0	0	0	0	0	0	0	0	1	1	1	0	0	0	0	0	0	0	0	0	2	1	1	0	0	0	2	1	1	15.2332	15.885
RBM14_HUMAN	Q96PK6	RNA-binding protein 14 OS=Homo sapiens GN=RBM14 PE=1 SV=2	0.396667	0.0700003	0.810113	0.883851			4.35	0.76	0.003741	11	10	10	16	13	13	16	13	13	12	11	11	16	11	11	19	14	14	11	10	10	11	11	11	12	11	11	10	8	8	14	10	10	3	3	3	22.73	26.62
MCM5_HUMAN	P33992	DNA replication licensing factor MCM5 OS=Homo sapiens GN=MCM5 PE=1 SV=5	0.243334	-0.0566667	0.843088	0.896336			3.41	0.73	0.001785	10	10	10	11	11	11	8	8	8	8	8	8	9	9	9	12	12	12	12	12	12	14	14	14	17	17	17	12	12	12	14	14	14	5	5	5	20.85	23.26
OLA1_HUMAN	Q9NTK5	Obg-like ATPase 1 OS=Homo sapiens GN=OLA1 PE=1 SV=2	0.44	-0.976666	0.7568	0.177716			3.35	0.66	0.014195	2	2	2	3	3	3	3	3	3	3	3	3	3	3	3	2	2	2	2	2	2	7	6	6	7	7	7	5	5	5	4	4	4	2	2	2	18.82	22.75
EWS_HUMAN	Q01844	RNA-binding protein EWS OS=Homo sapiens GN=EWSR1 PE=1 SV=1	0.406667	0.459999	0.757006	0.217033			5.62	0.79	0.105252	3	3	3	4	3	3	3	2	2	3	2	2	4	4	4	6	5	5	3	2	2	5	4	4	5	3	3	4	2	2	4	3	3	2	2	2	21.97	24.44
TFG_HUMAN	Q92734	Protein TFG OS=Homo sapiens GN=TFG PE=1 SV=2	0.0533326	-1.01333	0.97043	0.0558444			4.56	0.72	0.132217	1	1	1	1	1	1	1	1	1	2	2	2	1	1	1	2	2	2	1	1	1	1	1	1	4	3	3	2	2	2	5	5	5	1	1	1	19.92	22.85
GBF1_HUMAN	Q92538	Golgi-specific brefeldin A-resistance guanine nucleotide exchange factor 1 OS=Homo sapiens GN=GBF1 PE=1 SV=2	-1.25219	-3.54436	0.418876	0.166892			1.95	0.46	0.021262	0	0	0	2	2	2	1	1	1	0	0	0	0	0	0	3	3	3	0	0	0	0	0	0	1	1	1	0	0	0	0	0	0	1	1	0	15.2294	17.51
DKC1_HUMAN	O60832	H/ACA ribonucleoprotein complex subunit 4 OS=Homo sapiens GN=DKC1 PE=1 SV=3	2.17	-0.263333	0.530955	0.465843			4.79	0.74	0.020947	7	7	7	14	12	12	5	4	4	8	7	7	7	7	7	12	9	9	12	10	10	11	9	9	12	7	7	8	7	7	9	9	9	3	3	3	20.85	29.62
TSN_HUMAN	Q15631	Translin OS=Homo sapiens GN=TSN PE=1 SV=1	0.103333	-1.68	0.928693	0.0921706			4.21	0.6	0.021414	6	5	5	4	3	3	5	5	5	6	5	5	7	5	5	5	4	4	2	2	2	6	5	5	6	6	6	7	6	6	7	6	6	1	1	1	21.01	23.23
SIAS_HUMAN	Q9NR45	Sialic acid synthase OS=Homo sapiens GN=NANS PE=1 SV=2	-0.409138	-1.48	0.839469	0.15732			3.17	0.74	0.00848	1	1	1	0	0	0	2	2	2	0	0	0	0	0	0	1	1	1	1	1	1	4	4	4	4	4	4	3	3	3	3	3	3	1	1	1	16.68	15.688
4F2_HUMAN	P08195	4F2 cell-surface antigen heavy chain OS=Homo sapiens GN=SLC3A2 PE=1 SV=3	0.703333	0.0433331	0.850188	0.973617			6.46	0.77	0.025439	2	2	2	26	20	20	5	5	5	4	4	4	3	3	3	17	15	15	3	3	3	11	11	11	9	8	8	4	4	4	7	7	7	3	3	3	17.71	27.57
MCM6_HUMAN	Q14566	DNA replication licensing factor MCM6 OS=Homo sapiens GN=MCM6 PE=1 SV=1	1.25	-0.946667	0.423141	0.295455			4.6	0.72	0.004768	5	5	5	7	7	7	6	6	6	3	3	3	4	4	4	7	7	7	6	6	6	13	12	12	7	7	7	12	11	11	7	7	7	4	4	4	20.11	22.63
PSDE_HUMAN	O00487	26S proteasome non-ATPase regulatory subunit 14 OS=Homo sapiens GN=PSMD14 PE=1 SV=1	-1.37667	-0.800001	0.1656	0.321452			3.93	0.72	0.134238	4	3	3	2	2	2	2	2	2	3	3	3	4	4	4	1	1	1	2	2	2	5	3	3	3	3	3	3	2	2	5	3	3	1	1	1	20.15	22.52
SYTC2_HUMAN	A2RTX5	Probable threonine--tRNA ligase 2, cytoplasmic OS=Homo sapiens GN=TARSL2 PE=1 SV=1	-0.414033	-1.67667	0.863261	0.124469			1.94	0.5	0.477662	0	0	0	1	1	0	1	1	0	0	0	0	0	0	0	2	2	0	1	1	0	1	1	0	1	1	0	1	1	0	1	1	0	1	1	0	15.3842	17.29
MCM7_HUMAN	P33993	DNA replication licensing factor MCM7 OS=Homo sapiens GN=MCM7 PE=1 SV=4	-0.213332	-0.383334	0.839288	0.508341			4.56	0.76	0.036014	10	9	9	5	4	4	7	6	6	9	8	8	11	9	9	9	8	8	8	8	8	13	12	12	12	11	11	9	8	8	12	11	11	5	5	5	20.31	21.43
AN32D_HUMAN	O95626	Acidic leucine-rich nuclear phosphoprotein 32 family member D OS=Homo sapiens GN=ANP32D PE=1 SV=2	0.546667	0.19	0.808572	0.909791			2.34	0.53	0.011909	5	2	0	5	2	0	4	2	0	2	2	0	5	2	0	6	2	0	2	2	0	4	2	0	4	2	0	3	2	0	1	1	0	1	1	0	19.42	24.51
CATA_HUMAN	P04040	Catalase OS=Homo sapiens GN=CAT PE=1 SV=3	1.01667	-0.580001	0.306253	0.0659901			4.14	0.74	0.013705	5	5	5	5	5	5	4	4	4	5	5	5	5	4	4	2	2	2	6	6	6	8	8	8	11	10	10	6	6	6	6	6	6	2	2	2	20.05	22.21
CAP1_HUMAN	Q01518	Adenylyl cyclase-associated protein 1 OS=Homo sapiens GN=CAP1 PE=1 SV=5	0.823334	-0.776667	0.69343	0.0810914			3.87	0.7	0.006448	4	4	3	4	4	3	3	3	3	4	4	3	1	1	1	4	4	3	4	4	3	8	8	8	9	8	8	8	7	7	7	6	6	2	2	2	20.03	23.06
TXND5_HUMAN	Q8NBS9	Thioredoxin domain-containing protein 5 OS=Homo sapiens GN=TXNDC5 PE=1 SV=2	2.03333	-1.15	0.386177	0.213504	Q8NBS9		3.79	0.72	0.010191	3	3	3	4	4	4	4	4	4	1	1	1	1	1	1	5	5	5	3	3	3	6	6	6	4	4	4	3	3	3	6	6	6	1	1	1	20.13	22.53
GLRX3_HUMAN	O76003	Glutaredoxin-3 OS=Homo sapiens GN=GLRX3 PE=1 SV=2	-1.18473	-0.526667	0.565754	0.420657			2.58	0.58	0.002734	2	2	2	0	0	0	4	4	4	2	2	2	2	2	2	1	1	1	3	3	3	6	5	5	6	5	5	4	4	4	4	4	4	2	2	2	18.63	14.1458
IQGA1_HUMAN	P46940	Ras GTPase-activating-like protein IQGAP1 OS=Homo sapiens GN=IQGAP1 PE=1 SV=1	-0.306667	-0.41	0.884768	0.599663			5.76	0.75	0.000359	17	16	13	53	49	43	15	14	12	20	19	17	27	26	22	50	46	41	13	13	11	30	28	25	17	17	16	19	19	17	22	21	20	7	7	5	19.83	24.62
PUR8_HUMAN	P30566	Adenylosuccinate lyase OS=Homo sapiens GN=ADSL PE=1 SV=2	0.29847	-3.48355	0.87152	0.160639			4.24	0.63	0.002707	1	1	1	1	1	1	0	0	0	1	1	1	0	0	0	1	1	1	0	0	0	1	1	1	4	4	4	2	2	2	4	4	4	2	2	2	17.18	19.93
PTGR1_HUMAN	Q14914	Prostaglandin reductase 1 OS=Homo sapiens GN=PTGR1 PE=1 SV=2	1.62333	-0.736667	0.323041	0.478252			3.69	0.62	0.09697	5	5	5	3	3	3	3	3	3	2	2	2	1	1	1	2	2	2	1	1	1	6	6	6	6	6	6	4	4	4	3	2	2	1	1	1	21.15	23.15
SSRD_HUMAN	P51571	Translocon-associated protein subunit delta OS=Homo sapiens GN=SSR4 PE=1 SV=1	1.02333	-2.97398	0.778304	0.0996154			4.06	0.72	0.026437	2	2	2	10	6	6	8	5	5	1	1	1	3	3	3	10	6	6	0	0	0	1	1	1	1	1	1	2	2	2	1	1	1	1	1	1	19.06	27.57
PIPNB_HUMAN	P48739	Phosphatidylinositol transfer protein beta isoform OS=Homo sapiens GN=PITPNB PE=1 SV=2	0.446667	-1.84667	0.745327	0.0803759			3.81	0.65	0.018394	4	4	3	6	6	6	4	4	3	3	3	2	4	4	3	6	6	6	4	4	4	4	4	3	2	2	2	5	5	4	6	6	5	1	1	1	19.93	22.43
HS105_HUMAN	Q92598	Heat shock protein 105 kDa OS=Homo sapiens GN=HSPH1 PE=1 SV=1	0.543332	0	0.700471	1			4.35	0.75	0.022227	10	10	9	15	14	11	14	12	11	10	8	7	13	11	10	14	13	12	10	10	9	11	11	9	8	8	6	9	9	7	10	10	8	4	4	4	20.73	24.05
SF3B3_HUMAN	Q15393	Splicing factor 3B subunit 3 OS=Homo sapiens GN=SF3B3 PE=1 SV=4	0.76	0.23	0.542004	0.599601			4.76	0.74	0.00116	13	12	12	11	11	11	14	10	10	12	11	11	7	7	7	18	14	14	16	14	14	17	16	16	13	13	13	15	14	14	16	15	15	4	4	4	21.28	22.81
DDX1_HUMAN	Q92499	ATP-dependent RNA helicase DDX1 OS=Homo sapiens GN=DDX1 PE=1 SV=2	-0.00333341	0.946667	0.997943	0.116951			5.26	0.7	0.003821	14	11	11	14	10	10	15	11	11	16	13	13	15	12	12	24	15	15	12	10	10	15	13	13	22	17	17	6	4	4	17	13	13	4	4	4	21.99	24.91
GLU2B_HUMAN	P14314	Glucosidase 2 subunit beta OS=Homo sapiens GN=PRKCSH PE=1 SV=2	1.17	-0.603333	0.413936	0.41887			3.98	0.71	0.055639	7	6	6	6	5	5	6	5	5	3	3	3	5	3	3	7	4	4	4	4	4	7	6	6	5	4	4	5	4	4	5	5	5	2	2	2	21.19	23.93
NOP2_HUMAN	P46087	Putative ribosomal RNA methyltransferase NOP2 OS=Homo sapiens GN=NOP2 PE=1 SV=2	0.363334	0.126667	0.805878	0.616581			4.4	0.78	0.001775	6	6	6	8	8	8	9	9	9	5	5	5	4	4	4	7	7	7	12	12	12	10	10	10	12	12	12	10	10	10	8	8	8	4	4	4	20.76	24.27
PRDBP_HUMAN	Q969G5	Protein kinase C delta-binding protein OS=Homo sapiens GN=PRKCDBP PE=1 SV=3	3.24146	-0.113333	0.0947386	0.741867			3.34	0.64	0.028991	2	2	2	3	3	3	4	4	4	1	1	1	1	1	1	0	0	0	4	3	3	5	5	5	5	5	5	2	2	2	3	3	3	1	1	1	17.93	22.06
SF3A1_HUMAN	Q15459	Splicing factor 3A subunit 1 OS=Homo sapiens GN=SF3A1 PE=1 SV=1	1.65667	0.186667	0.34493	0.372665			5.39	0.76	0.011465	11	10	10	8	7	7	11	9	9	2	2	2	7	6	6	11	9	9	14	13	13	13	13	13	15	14	14	12	11	11	16	15	15	4	4	4	21.33	23.2
MK01_HUMAN	P28482	Mitogen-activated protein kinase 1 OS=Homo sapiens GN=MAPK1 PE=1 SV=3	0.61	-2.14	0.706837	0.238109			3.89	0.67	0.001576	3	3	2	5	5	4	9	8	7	6	6	4	4	4	3	4	4	3	1	1	1	5	5	4	5	4	3	5	4	3	4	4	3	2	2	1	18.29	22.49
OST48_HUMAN	P39656	Dolichyl-diphosphooligosaccharide--protein glycosyltransferase 48 kDa subunit OS=Homo sapiens GN=DDOST PE=1 SV=4	-0.203333	-0.15	0.943806	0.731663			3.73	0.72	0.022568	3	3	3	17	12	12	12	11	11	7	7	7	7	7	7	16	11	11	3	3	3	3	3	3	5	5	5	2	2	2	5	5	5	2	2	2	19.33	27.19
DDB1_HUMAN	Q16531	DNA damage-binding protein 1 OS=Homo sapiens GN=DDB1 PE=1 SV=1	0.903334	-0.0966663	0.562383	0.857965			4.86	0.71	0.016113	7	7	7	9	9	9	5	4	4	6	6	6	3	3	3	4	4	4	11	11	11	11	11	11	9	9	9	10	10	10	9	9	9	3	3	3	20.1	22.92
CAPR1_HUMAN	Q14444	Caprin-1 OS=Homo sapiens GN=CAPRIN1 PE=1 SV=2	0.48	0.00666682	0.779251	0.987801			5.64	0.7	0.010255	7	7	7	16	12	12	17	13	13	8	6	6	6	5	5	13	11	11	4	4	4	3	3	3	4	4	4	5	4	4	4	3	3	1	1	1	22.89	26.97
LASP1_HUMAN	Q14847	LIM and SH3 domain protein 1 OS=Homo sapiens GN=LASP1 PE=1 SV=2	0.586667	-1.07	0.718864	0.220969			3.3	0.68	0.000268	4	4	4	4	3	3	8	5	5	2	2	2	4	3	3	9	5	5	2	2	2	4	4	4	5	4	4	7	4	4	7	4	4	1	1	1	20.35	23.35
SAHH2_HUMAN	O43865	Putative adenosylhomocysteinase 2 OS=Homo sapiens GN=AHCYL1 PE=1 SV=2	0.943333	-1.10667	0.634321	0.0967758			3.06	0.61	0.013566	3	3	0	2	2	1	1	1	0	1	1	0	1	1	0	4	4	0	3	3	1	3	2	1	5	3	1	4	4	1	3	3	1	2	2	0	19.56	22.41
GGCT_HUMAN	O75223	Gamma-glutamylcyclotransferase OS=Homo sapiens GN=GGCT PE=1 SV=1	0.279743	-1.01	0.915019	0.229287			3.02	0.65	0.032879	3	3	3	0	0	0	1	1	1	2	2	2	4	3	3	0	0	0	3	3	3	5	5	5	2	2	2	3	3	3	4	4	4	1	1	1	20.64	15.2552
WDR12_HUMAN	Q9GZL7	Ribosome biogenesis protein WDR12 OS=Homo sapiens GN=WDR12 PE=1 SV=2	1.39	-1.09667	0.463947	0.147315			4.01	0.74	0.012595	2	2	2	3	3	3	2	2	2	1	1	1	1	1	1	2	2	2	2	2	2	5	5	5	4	4	4	5	5	5	4	4	4	1	1	1	18.24	22.2
PAP1M_HUMAN	Q5JQF8	Polyadenylate-binding protein 1-like 2 OS=Homo sapiens GN=PABPC1L2A PE=1 SV=1	0.27	0.786668	0.86821	0.189269			2.78	0.59	0.052157	3	2	0	2	1	0	4	2	0	3	2	0	3	2	0	3	2	0	2	2	0	2	2	0	3	2	0	2	2	0	2	1	0	1	1	0	21.83	25.25
LC7L2_HUMAN	Q9Y383	Putative RNA-binding protein Luc7-like 2 OS=Homo sapiens GN=LUC7L2 PE=1 SV=2	0.333333	-0.00999959	0.820396	0.984809			3.04	0.65	0.001387	3	2	1	5	2	1	4	2	1	3	2	1	3	2	1	3	2	1	2	1	0	3	2	1	3	2	1	2	2	1	3	3	2	1	1	0	19.74	22.99
TYSY_HUMAN	P04818	Thymidylate synthase OS=Homo sapiens GN=TYMS PE=1 SV=3	1.16965	-2.64163	0.598415	0.152609			4.59	0.75	0.068877	0	0	0	2	2	2	3	3	3	0	0	0	0	0	0	3	3	3	0	0	0	2	2	2	1	1	1	2	2	2	2	2	2	1	1	1	17.0675	19.61
PSD12_HUMAN	O00232	26S proteasome non-ATPase regulatory subunit 12 OS=Homo sapiens GN=PSMD12 PE=1 SV=3	-1.04667	-0.813334	0.559989	0.140807			4.55	0.73	0.016935	3	3	3	2	2	2	1	1	1	4	4	4	3	3	3	3	3	3	6	6	6	7	6	6	6	5	5	7	7	7	7	6	6	2	2	2	19.36	21.33
PURA_HUMAN	Q00577	Transcriptional activator protein Pur-alpha OS=Homo sapiens GN=PURA PE=1 SV=2	0.276667	-0.496667	0.813617	0.739251			4.05	0.7	0.047653	2	2	2	1	1	1	2	1	1	1	1	1	1	1	1	1	1	1	2	2	2	7	7	4	3	3	3	2	2	2	5	5	4	1	1	0	19.35	21.78
DYHC1_HUMAN	Q14204	Cytoplasmic dynein 1 heavy chain 1 OS=Homo sapiens GN=DYNC1H1 PE=1 SV=5	0.113334	1.66	0.945693	0.22771			4.58	0.8	0.000541	55	53	53	101	95	95	97	91	91	63	61	61	62	60	60	93	89	89	59	58	58	73	73	73	66	64	64	23	23	23	47	46	46	15	15	15	19.54	23.58
AURKC_HUMAN	Q9UQB9	Aurora kinase C OS=Homo sapiens GN=AURKC PE=1 SV=1	0.577197	-0.334947	0.649153	0.909745			1.99	0.56	0.182835	1	1	0	0	0	0	1	1	0	1	1	0	2	2	0	0	0	0	1	1	0	1	1	0	0	0	0	1	1	0	0	0	0	1	1	0	17.44	17.0053
AN32A_HUMAN	P39687	Acidic leucine-rich nuclear phosphoprotein 32 family member A OS=Homo sapiens GN=ANP32A PE=1 SV=1	0.786666	-0.173333	0.710538	0.849023			3.23	0.68	0.011909	7	4	1	9	6	2	7	5	2	3	3	1	6	3	1	10	6	2	5	5	2	7	5	2	7	5	2	6	5	2	4	4	2	1	1	0	20.56	25
AN32C_HUMAN	O43423	Acidic leucine-rich nuclear phosphoprotein 32 family member C OS=Homo sapiens GN=ANP32C PE=2 SV=1	1.24667	-0.706666	0.667322	0.506004			2.98	0.61	0.033024	3	2	0	3	2	0	3	2	0	1	1	0	2	1	0	3	2	0	2	2	0	3	2	0	2	2	0	2	2	0	1	1	0	1	1	0	18.09	24.31
C1QBP_HUMAN	Q07021	Complement component 1 Q subcomponent-binding protein, mitochondrial OS=Homo sapiens GN=C1QBP PE=1 SV=1	3.08086	-0.506332	0.561116	0.847019			5.72	0.73	0.028253	0	0	0	17	7	7	8	5	5	0	0	0	2	2	2	8	6	6	0	0	0	1	1	1	2	2	2	0	0	0	0	0	0	1	1	1	15.9195	28.86
BYST_HUMAN	Q13895	Bystin OS=Homo sapiens GN=BYSL PE=1 SV=3	1.85667	-0.969999	0.343716	0.0581037			3.88	0.73	0.029668	3	3	3	5	5	5	5	5	5	4	4	4	1	1	1	4	4	4	8	8	8	7	7	7	12	12	12	12	12	12	13	13	13	2	2	2	19.27	22.82
SYHM_HUMAN	P49590	Probable histidine--tRNA ligase, mitochondrial OS=Homo sapiens GN=HARS2 PE=1 SV=1	2.26079	-0.553333	0.328046	0.26112			3.23	0.71	0.001488	2	2	0	5	5	4	1	1	0	0	0	0	1	1	0	1	1	0	3	3	0	4	4	0	3	3	0	2	2	0	2	2	0	2	2	0	19.1	23.41
RAB7A_HUMAN	P51149	Ras-related protein Rab-7a OS=Homo sapiens GN=RAB7A PE=1 SV=1	0.566668	-1.48333	0.846281	0.0895585			4.34	0.73	0.002277	5	5	5	21	12	12	15	10	10	6	5	5	6	5	5	17	11	11	2	2	2	5	5	5	3	3	3	4	4	4	5	5	5	1	1	1	19.58	26.75
IF4B_HUMAN	P23588	Eukaryotic translation initiation factor 4B OS=Homo sapiens GN=EIF4B PE=1 SV=2	1.06667	0.773333	0.543506	0.106215			4.56	0.73	0.044477	12	9	9	13	9	9	13	9	9	10	7	7	11	7	7	12	8	8	13	11	11	12	9	9	11	10	10	10	9	9	8	6	6	2	2	2	22.34	26.21
LUC7L_HUMAN	Q9NQ29	Putative RNA-binding protein Luc7-like 1 OS=Homo sapiens GN=LUC7L PE=1 SV=1	0.249999	0.746667	0.860334	0.474884			3.18	0.74	0.001387	2	1	0	3	2	1	4	2	1	2	1	0	2	1	0	4	3	2	2	1	0	2	1	0	3	2	1	1	1	0	1	1	0	1	1	0	19.38	22.28
SMC3_HUMAN	Q9UQE7	Structural maintenance of chromosomes protein 3 OS=Homo sapiens GN=SMC3 PE=1 SV=2	0.0333328	0.833335	0.975347	0.119996			4.24	0.76	0.001516	33	23	23	10	10	10	11	10	10	20	17	17	25	23	23	28	27	27	33	29	29	30	25	25	29	26	26	18	17	17	18	16	16	5	5	5	20.81	22.98
COPB2_HUMAN	P35606	Coatomer subunit beta' OS=Homo sapiens GN=COPB2 PE=1 SV=2	-1.33333	-0.113333	0.607882	0.862662			3.74	0.7	0.005121	1	1	1	5	5	5	5	5	5	4	4	4	4	4	4	11	11	11	8	8	8	14	14	14	9	9	9	10	10	10	9	9	9	3	3	3	15.65	22.35
PURB_HUMAN	Q96QR8	Transcriptional activator protein Pur-beta OS=Homo sapiens GN=PURB PE=1 SV=3	0.636666	-0.513334	0.643905	0.611468			3.12	0.56	0.010545	2	2	2	3	3	3	4	4	4	5	5	5	5	5	4	2	2	2	3	3	3	7	7	4	4	4	4	4	4	4	4	4	3	1	1	0	17.8	21.97
IF4E_HUMAN	P06730	Eukaryotic translation initiation factor 4E OS=Homo sapiens GN=EIF4E PE=1 SV=2	-0.0699997	-0.746667	0.967696	0.355481			3.28	0.72	0.030337	1	1	1	1	1	1	4	3	3	1	1	1	2	1	1	5	4	4	2	1	1	2	1	1	3	2	2	3	2	2	2	1	1	1	1	1	20.71	24.1
EIF3J_HUMAN	O75822	Eukaryotic translation initiation factor 3 subunit J OS=Homo sapiens GN=EIF3J PE=1 SV=2	-0.0900002	-1.14667	0.954389	0.354362			4.02	0.77	0.003527	6	6	6	8	6	6	9	8	8	8	8	8	7	6	6	14	10	10	2	1	1	6	6	6	4	4	4	6	6	6	5	5	5	1	1	1	21.84	25.39
EHD1_HUMAN	Q9H4M9	EH domain-containing protein 1 OS=Homo sapiens GN=EHD1 PE=1 SV=2	0.976667	-3.62516	0.573147	0.0870554			2.69	0.59	0.052862	1	1	0	2	2	0	2	2	0	2	2	0	1	1	0	1	1	0	3	3	0	2	2	1	0	0	0	5	5	3	3	3	1	2	2	1	17.69	22.09
FUMH_HUMAN	P07954	Fumarate hydratase, mitochondrial OS=Homo sapiens GN=FH PE=1 SV=3	2.25559	-0.199999	0.586135	0.865595			5.57	0.76	0.032459	1	1	1	18	14	14	2	2	2	0	0	0	0	0	0	8	8	8	1	1	1	7	7	7	9	8	8	2	2	2	4	4	4	1	1	1	17.07	26.69
CSK21_HUMAN	P68400	Casein kinase II subunit alpha OS=Homo sapiens GN=CSNK2A1 PE=1 SV=1	1.38202	-0.613334	0.457923	0.0753967			3.83	0.7	0.034011	5	5	5	7	7	7	5	5	5	0	0	0	4	4	4	5	5	5	5	5	5	4	4	4	4	4	4	3	3	3	5	5	5	1	1	1	19.4	21.94
STRBP_HUMAN	Q96SI9	Spermatid perinuclear RNA-binding protein OS=Homo sapiens GN=STRBP PE=1 SV=1	1.13667	-0.183333	0.359973	0.646367			3.69	0.74	0.019623	5	5	1	3	2	0	4	2	0	2	2	0	2	2	0	2	2	0	6	5	1	5	4	1	5	3	0	4	3	0	6	5	0	3	2	0	20.41	22.94
ACTN3_HUMAN	Q08043	Alpha-actinin-3 OS=Homo sapiens GN=ACTN3 PE=1 SV=2	-0.845551	-0.0300007	0.766913	0.962179			3.6	0.73	0.006223	2	2	0	5	5	0	0	0	0	1	1	0	2	2	0	5	5	0	3	2	0	3	3	0	2	2	0	3	2	0	3	2	0	2	2	0	19.4	23.72
TIA1_HUMAN	P31483	Nucleolysin TIA-1 isoform p40 OS=Homo sapiens GN=TIA1 PE=1 SV=3	1.23946	-0.723333	0.679897	0.246084			2.29	0.62	0.011214	1	1	1	4	4	1	2	2	1	0	0	0	1	1	0	4	4	2	2	2	1	3	3	1	4	4	1	2	2	1	4	4	1	1	1	0	17.02	23.36
LAT1_HUMAN	Q01650	Large neutral amino acids transporter small subunit 1 OS=Homo sapiens GN=SLC7A5 PE=1 SV=2	1.61667	-0.253333	0.642516	0.817029			3.56	0.73	0.023769	2	2	1	13	5	4	4	3	2	1	1	1	2	2	2	14	7	6	2	2	2	9	4	3	6	3	2	4	3	2	2	2	2	1	1	1	18.28	26.41
RFC5_HUMAN	P40937	Replication factor C subunit 5 OS=Homo sapiens GN=RFC5 PE=1 SV=1	0.826666	-0.226666	0.499316	0.788991			5.83	0.72	0.029781	8	8	8	7	7	7	8	8	8	5	5	5	6	6	6	6	6	6	5	4	4	11	10	10	8	8	8	4	4	4	4	4	4	1	1	1	20.08	23.23
WDR61_HUMAN	Q9GZS3	WD repeat-containing protein 61 OS=Homo sapiens GN=WDR61 PE=1 SV=1	0.0866661	-1.48667	0.962281	0.0770203			3.17	0.66	0.059966	2	2	2	2	2	2	2	2	2	1	1	1	5	4	4	6	6	6	2	2	2	3	3	3	2	2	2	3	3	3	3	3	3	1	1	1	19.83	22.61
SYAC_HUMAN	P49588	Alanine--tRNA ligase, cytoplasmic OS=Homo sapiens GN=AARS PE=1 SV=2	1.01667	-0.23	0.513694	0.818978			4.14	0.77	0.010132	8	8	8	6	6	6	7	7	7	4	4	4	3	3	3	8	8	8	6	6	6	12	11	11	5	5	5	10	10	10	6	6	6	3	3	3	19.79	22.23
AURKB_HUMAN	Q96GD4	Aurora kinase B OS=Homo sapiens GN=AURKB PE=1 SV=3	0.0466665	-0.874302	0.971203	0.763318			4.3	0.73	0.067725	2	2	1	3	3	3	5	5	4	3	3	2	4	4	2	4	4	4	1	1	0	1	1	0	0	0	0	1	1	0	0	0	0	1	1	0	17.77	20.97
RFC4_HUMAN	P35249	Replication factor C subunit 4 OS=Homo sapiens GN=RFC4 PE=1 SV=2	-0.123334	-0.0300001	0.937453	0.975783			2.94	0.69	0.003954	9	9	9	8	7	7	11	10	10	11	10	10	10	9	9	8	8	8	11	9	9	12	11	11	11	10	10	11	9	9	13	11	11	2	1	1	21.05	23.87
BAP31_HUMAN	P51572	B-cell receptor-associated protein 31 OS=Homo sapiens GN=BCAP31 PE=1 SV=3	-0.226666	-1.21	0.901387	0.200017			3.89	0.7	0.028989	2	2	2	4	3	3	4	3	3	4	3	3	4	3	3	6	5	5	3	3	3	6	5	5	5	4	4	3	3	3	8	6	6	1	1	1	18.93	22.97
DNJC9_HUMAN	Q8WXX5	DnaJ homolog subfamily C member 9 OS=Homo sapiens GN=DNAJC9 PE=1 SV=1	0.486666	-0.946667	0.709285	0.134167			3.24	0.61	0.016962	6	6	6	3	3	3	3	3	3	4	4	4	5	5	5	3	3	3	3	3	3	5	5	5	6	6	6	4	4	4	6	6	6	1	1	1	19.92	22.81
SF3B1_HUMAN	O75533	Splicing factor 3B subunit 1 OS=Homo sapiens GN=SF3B1 PE=1 SV=3	-0.0100002	-0.0133336	0.995838	0.983987			4.84	0.74	0.003642	10	7	7	17	15	15	13	12	12	20	17	17	13	13	13	29	25	25	16	14	14	17	15	15	10	10	10	9	9	9	12	11	11	4	4	4	19.49	23.99
KC1E_HUMAN	P49674	Casein kinase I isoform epsilon OS=Homo sapiens GN=CSNK1E PE=1 SV=1	0.203333	-1.92667	0.893447	0.150063			3.46	0.73	0.01999	10	8	2	15	12	3	23	14	4	8	8	4	13	8	4	19	12	3	3	3	1	6	6	1	6	6	1	5	5	2	8	8	2	1	1	0	21.87	25.53
KC1D_HUMAN	P48730	Casein kinase I isoform delta OS=Homo sapiens GN=CSNK1D PE=1 SV=2	0.480001	-1.74333	0.773493	0.192724			3.92	0.73	0.022335	9	7	1	11	10	1	19	12	2	5	5	1	7	4	0	16	11	2	2	2	0	5	5	0	6	6	1	3	3	0	6	6	0	1	1	0	21.52	25.03
EXOS2_HUMAN	Q13868	Exosome complex component RRP4 OS=Homo sapiens GN=EXOSC2 PE=1 SV=2	0.253333	-0.336666	0.868365	0.637629			3.77	0.73	0.010092	3	3	3	3	3	3	3	3	3	3	3	3	3	3	3	4	4	4	5	5	5	6	6	6	9	8	8	6	6	6	8	7	7	1	1	1	19.22	22.33
EIF2A_HUMAN	Q9BY44	Eukaryotic translation initiation factor 2A OS=Homo sapiens GN=EIF2A PE=1 SV=3	0.1	0.0566673	0.940663	0.926252			4.44	0.73	0.012	10	9	9	9	9	9	12	11	11	11	11	11	11	11	11	12	11	11	13	11	11	11	10	10	18	12	12	10	9	9	12	9	9	2	2	2	21.28	24.23
GNL3_HUMAN	Q9BVP2	Guanine nucleotide-binding protein-like 3 OS=Homo sapiens GN=GNL3 PE=1 SV=2	0.556666	0.9	0.665588	0.145107			5.74	0.74	0.010608	9	8	8	4	4	4	3	3	3	3	3	3	5	5	5	6	6	6	8	8	8	6	6	6	11	10	10	7	5	5	8	8	8	2	2	2	21.62	23.57
MPRD_HUMAN	P20645	Cation-dependent mannose-6-phosphate receptor OS=Homo sapiens GN=M6PR PE=1 SV=1	-2.9003	-1.11951	0.146125	0.659006			3.36	0.62	0.027248	0	0	0	0	0	0	0	0	0	0	0	0	0	0	0	1	1	1	0	0	0	1	1	1	1	1	1	0	0	0	2	2	2	1	1	1	15.6966	16.195
AL7A1_HUMAN	P49419	Alpha-aminoadipic semialdehyde dehydrogenase OS=Homo sapiens GN=ALDH7A1 PE=1 SV=5	0.746306	-0.156666	0.855917	0.77108			4.49	0.73	0.052114	0	0	0	14	12	12	0	0	0	0	0	0	0	0	0	2	2	2	4	4	4	6	6	6	6	6	6	5	5	5	4	4	4	2	2	2	15.6808	25.54
KRR1_HUMAN	Q13601	KRR1 small subunit processome component homolog OS=Homo sapiens GN=KRR1 PE=1 SV=4	0.816666	1.02	0.649858	0.348584			2.88	0.59	0.004251	1	1	1	3	3	3	1	1	1	1	1	1	1	1	1	1	1	1	2	2	2	3	3	3	3	3	3	1	1	1	2	2	2	1	1	1	17.5	21.83
ASNS_HUMAN	P08243	Asparagine synthetase [glutamine-hydrolyzing] OS=Homo sapiens GN=ASNS PE=1 SV=4	0.38275	-1.49	0.874854	0.187392			3.02	0.59	0.013332	2	2	2	0	0	0	1	1	1	2	2	2	1	1	1	0	0	0	1	1	1	6	6	6	3	3	3	4	4	4	4	4	4	1	1	1	18.19	15.938
IF4H_HUMAN	Q15056	Eukaryotic translation initiation factor 4H OS=Homo sapiens GN=EIF4H PE=1 SV=5	0.923333	-1.83333	0.674922	0.0583209			3.56	0.7	0.032016	4	3	3	7	6	6	4	4	4	4	3	3	3	3	3	4	3	3	1	1	1	2	2	2	2	2	2	1	1	1	2	2	2	1	1	1	19.47	24.37
WDR74_HUMAN	Q6RFH5	WD repeat-containing protein 74 OS=Homo sapiens GN=WDR74 PE=1 SV=1	0.19	0.143333	0.893328	0.685117			3.45	0.65	0.003566	2	2	2	3	3	3	3	3	3	2	2	2	2	2	2	4	3	3	4	4	4	5	5	5	5	5	5	4	4	4	4	4	4	1	1	1	18.26	21.32
FHL1_HUMAN	Q13642	Four and a half LIM domains protein 1 OS=Homo sapiens GN=FHL1 PE=1 SV=4	0.746666	-1.87667	0.612198	0.08925			2.72	0.72	0.074526	1	1	1	1	1	1	2	2	2	1	1	1	1	1	1	1	1	1	1	1	1	1	1	1	1	1	1	1	1	1	1	1	1	1	1	1	17.72	20.46
CPNE3_HUMAN	O75131	Copine-3 OS=Homo sapiens GN=CPNE3 PE=1 SV=1	0	-2.92235	1	0.127952			2.38	0.58	0.03401	0	0	0	0	0	0	0	0	0	0	0	0	0	0	0	0	0	0	0	0	0	5	5	4	1	1	0	3	3	2	2	2	1	1	1	1	17.4638	14.0228
MYH14_HUMAN	Q7Z406	Myosin-14 OS=Homo sapiens GN=MYH14 PE=1 SV=2	0.253333	-0.453333	0.897269	0.412057			3.38	0.68	0.020164	7	4	1	11	7	1	8	5	1	5	4	1	6	5	2	10	7	1	3	2	0	5	4	1	5	3	1	4	3	0	5	4	1	4	3	1	19.16	23.52
EHD3_HUMAN	Q9NZN3	EH domain-containing protein 3 OS=Homo sapiens GN=EHD3 PE=1 SV=2	0.98	-3.42323	0.572241	0.0904243			2.41	0.59	0.14909	1	1	0	2	2	0	2	2	0	2	2	0	1	1	0	1	1	0	3	3	0	1	1	0	0	0	0	2	2	0	2	2	0	1	1	0	17.83	22.23
CPVL_HUMAN	Q9H3G5	Probable serine carboxypeptidase CPVL OS=Homo sapiens GN=CPVL PE=1 SV=2	0.306667	-0.62	0.8316	0.0958904			3.31	0.55	0.02434	2	2	2	2	2	2	3	3	3	2	2	2	4	3	3	5	3	3	3	2	2	2	2	2	3	2	2	4	3	3	3	3	3	1	1	1	19.26	21.67
PYR1_HUMAN	P27708	CAD protein OS=Homo sapiens GN=CAD PE=1 SV=3	0.649999	0.303334	0.750827	0.577878			6.35	0.8	0.000982	19	17	17	44	31	27	29	24	23	15	13	13	19	17	15	39	31	28	20	19	17	29	24	20	22	19	17	19	16	14	17	15	13	5	5	4	19.64	24.71
CDC5L_HUMAN	Q99459	Cell division cycle 5-like protein OS=Homo sapiens GN=CDC5L PE=1 SV=2	0.43	0.493334	0.698052	0.31147			5.93	0.76	0.001416	12	11	11	6	6	6	6	6	6	9	8	8	9	8	8	9	9	9	11	11	11	9	9	9	12	12	12	9	9	9	9	9	9	2	2	2	21.35	23.28
PGES2_HUMAN	Q9H7Z7	Prostaglandin E synthase 2 OS=Homo sapiens GN=PTGES2 PE=1 SV=1	1.13667	-2.15	0.64746	0.126226			4.29	0.73	0.012251	2	2	2	11	10	10	1	1	1	1	1	1	1	1	1	7	7	7	1	1	1	3	3	3	1	1	1	2	2	2	2	2	2	1	1	1	18.4	24.06
RTN4_HUMAN	Q9NQC3	Reticulon-4 OS=Homo sapiens GN=RTN4 PE=1 SV=2	1.10718	-0.656666	0.730348	0.389792			4.01	0.67	0.052984	0	0	0	4	2	2	1	1	1	0	0	0	0	0	0	3	2	2	1	1	1	4	2	2	3	2	2	4	2	2	2	2	2	2	2	2	15.5641	22.82
RL4_HUMAN	P36578	60S ribosomal protein L4 OS=Homo sapiens GN=RPL4 PE=1 SV=5	0.853333	0.153333	0.72069	0.842961			4.86	0.74	0.006696	12	8	8	27	14	14	23	12	12	14	10	10	15	10	10	26	16	16	12	9	9	17	13	13	19	13	13	14	10	10	16	11	11	1	1	1	22.78	28.04
SMCA4_HUMAN	P51532	Transcription activator BRG1 OS=Homo sapiens GN=SMARCA4 PE=1 SV=2	-0.0666656	-1.03667	0.965936	0.0787514	P51532		3.94	0.72	0.005535	7	6	2	10	10	4	14	14	8	9	9	4	8	8	3	17	16	8	6	6	2	6	6	2	11	10	5	7	6	2	9	9	4	3	3	1	18.12	21.41
AP2M1_HUMAN	Q96CW1	AP-2 complex subunit mu OS=Homo sapiens GN=AP2M1 PE=1 SV=2	-0.246667	-0.963334	0.904678	0.247798			4.22	0.69	0.007818	2	2	2	5	4	4	5	4	4	4	4	4	5	5	5	5	5	5	2	2	2	5	5	5	7	7	7	6	6	6	6	6	6	1	1	1	18.3	23.59
RCC1_HUMAN	P18754	Regulator of chromosome condensation OS=Homo sapiens GN=RCC1 PE=1 SV=1	-0.853906	-4.01917	0.665484	0.0991308			3.41	0.7	0.03127	0	0	0	1	1	1	0	0	0	1	1	1	0	0	0	1	1	1	0	0	0	2	2	2	0	0	0	4	4	4	1	1	1	1	1	1	15.9461	19.24
TOM34_HUMAN	Q15785	Mitochondrial import receptor subunit TOM34 OS=Homo sapiens GN=TOMM34 PE=1 SV=2	1.64333	-0.139617	0.530423	0.956532			3.26	0.65	0.032413	3	3	3	5	4	4	3	3	3	1	1	1	1	1	1	5	4	4	2	2	2	1	1	1	2	2	2	3	3	3	0	0	0	1	1	1	19.1	22.65
ADK_HUMAN	P55263	Adenosine kinase OS=Homo sapiens GN=ADK PE=1 SV=2	0.040583	-3.01585	0.982437	0.161012			1.81	0.54	0.072176	1	1	1	0	0	0	0	0	0	0	0	0	0	0	0	1	1	1	0	0	0	2	2	2	1	1	1	2	2	2	5	5	5	1	1	1	18.2	16.3818
SEP11_HUMAN	Q9NVA2	Septin-11 OS=Homo sapiens GN=SEPT11 PE=1 SV=3	1.08667	-0.613333	0.504269	0.259611			3.44	0.69	0.047272	2	2	1	2	2	1	2	2	2	1	1	1	1	1	1	2	2	1	6	6	3	7	6	2	6	6	2	6	6	2	8	7	2	1	1	0	17.75	21.21
ABCF1_HUMAN	Q8NE71	ATP-binding cassette sub-family F member 1 OS=Homo sapiens GN=ABCF1 PE=1 SV=2	0.366667	0.67	0.731763	0.281619			5.53	0.79	0.001623	13	12	12	9	9	9	11	10	10	11	10	10	11	11	11	11	9	9	21	19	19	12	11	11	19	17	17	14	13	13	15	13	13	3	3	3	21.08	22.94
TERA_HUMAN	P55072	Transitional endoplasmic reticulum ATPase OS=Homo sapiens GN=VCP PE=1 SV=4	0.203334	0.24	0.90521	0.783089			4.33	0.73	0.010995	6	6	6	12	10	10	7	7	7	8	8	8	8	8	8	13	12	12	12	8	8	19	18	18	10	10	10	11	11	11	10	9	9	3	3	3	20.7	24.49
MAT2B_HUMAN	Q9NZL9	Methionine adenosyltransferase 2 subunit beta OS=Homo sapiens GN=MAT2B PE=1 SV=1	0.406666	-2.24843	0.730722	0.342222			3.95	0.69	0.015943	1	1	1	1	1	1	3	3	3	1	1	1	1	1	1	2	2	2	0	0	0	3	3	3	2	2	2	1	1	1	2	2	2	1	1	1	18.21	19.31
ARP2_HUMAN	P61160	Actin-related protein 2 OS=Homo sapiens GN=ACTR2 PE=1 SV=1	0.78	-1.3	0.692765	0.235456			3.4	0.72	0.007578	1	1	1	2	2	2	3	3	3	2	1	1	1	1	1	2	2	2	1	1	1	3	3	3	4	4	4	3	3	3	6	6	6	1	1	1	17.98	22.18
MYH11_HUMAN	P35749	Myosin-11 OS=Homo sapiens GN=MYH11 PE=1 SV=3	0.249999	-0.443334	0.900202	0.411918			4.67	0.73	0.04147	8	5	0	15	11	0	8	6	0	7	6	0	8	6	0	13	11	0	3	2	0	7	6	1	5	3	0	4	3	0	5	4	0	3	2	0	19.3	23.65
DNJC7_HUMAN	Q99615	DnaJ homolog subfamily C member 7 OS=Homo sapiens GN=DNAJC7 PE=1 SV=2	0.833333	-0.923333	0.670191	0.38661			3.56	0.69	0.029538	5	5	5	5	5	5	5	5	5	2	2	2	3	3	3	7	7	7	7	7	7	6	6	6	7	6	6	11	10	10	13	11	11	2	2	2	18.86	22.69
DC1I2_HUMAN	Q13409	Cytoplasmic dynein 1 intermediate chain 2 OS=Homo sapiens GN=DYNC1I2 PE=1 SV=3	2.22895	0.0433337	0.174679	0.864458			2.95	0.68	0.005611	1	1	1	1	1	1	1	1	1	0	0	0	2	2	2	0	0	0	3	3	3	3	3	3	3	3	3	2	2	2	3	3	3	1	1	1	18.27	21.19
CPSM_HUMAN	P31327	Carbamoyl-phosphate synthase [ammonia], mitochondrial OS=Homo sapiens GN=CPS1 PE=1 SV=2	1.42	1.16333	0.807009	0.414654			7.15	0.8	0.000549	1	1	1	188	76	72	14	12	11	2	2	2	7	6	4	102	65	62	8	8	6	42	33	29	29	27	25	17	15	13	10	10	8	4	4	3	14.65	29.27
ETFA_HUMAN	P13804	Electron transfer flavoprotein subunit alpha, mitochondrial OS=Homo sapiens GN=ETFA PE=1 SV=1	1.75262	-2.06526	0.716698	0.460191			4.38	0.77	0.038937	0	0	0	18	8	8	2	2	2	0	0	0	0	0	0	10	8	8	0	0	0	6	5	5	2	1	1	2	2	2	1	1	1	1	1	1	16.0623	27.39
1C07_HUMAN	P10321	HLA class I histocompatibility antigen, Cw-7 alpha chain OS=Homo sapiens GN=HLA-C PE=1 SV=3	1.189	-0.0803699	0.692251	0.976182			4.73	0.74	0.031364	0	0	0	5	3	1	1	1	1	1	1	0	0	0	0	4	3	1	0	0	0	0	0	0	1	1	0	0	0	0	0	0	0	1	1	0	16.8907	22.37
1C16_HUMAN	Q29960	HLA class I histocompatibility antigen, Cw-16 alpha chain OS=Homo sapiens GN=HLA-C PE=2 SV=1	0.71902	1.00133	0.838392	0.665017			3.55	0.74	0.033035	0	0	0	3	3	0	2	2	0	1	1	0	0	0	0	4	4	0	0	0	0	1	1	0	2	2	0	0	0	0	0	0	0	1	1	0	16.2419	23.45
1C06_HUMAN	Q29963	HLA class I histocompatibility antigen, Cw-6 alpha chain OS=Homo sapiens GN=HLA-C PE=1 SV=2	1.96754	0.491669	0.546932	0.836136			4.99	0.74	0.031364	0	0	0	4	4	0	2	2	0	1	1	0	0	0	0	4	4	0	0	0	0	1	1	0	2	2	0	0	0	0	0	0	0	1	1	0	18.1523	23.47
1C05_HUMAN	Q9TNN7	HLA class I histocompatibility antigen, Cw-5 alpha chain OS=Homo sapiens GN=HLA-C PE=2 SV=1	1.02519	0.8568	0.748286	0.725305			4.99	0.74	0.2272	0	0	0	2	2	0	2	2	0	1	1	0	0	0	0	3	3	0	0	0	0	1	1	0	2	2	0	0	0	0	0	0	0	1	1	0	16.8635	22.8
1C08_HUMAN	P30505	HLA class I histocompatibility antigen, Cw-8 alpha chain OS=Homo sapiens GN=HLA-C PE=2 SV=1	0.957814	1.20659	0.78117	0.623573			4.99	0.74	0.2272	0	0	0	2	2	0	2	2	0	1	1	0	0	0	0	3	3	0	0	0	0	1	1	0	2	2	0	0	0	0	0	0	0	1	1	0	15.8634	22.8
KI20A_HUMAN	O95235	Kinesin-like protein KIF20A OS=Homo sapiens GN=KIF20A PE=1 SV=1	-0.213333	-0.546666	0.849395	0.531769			3.91	0.72	0.026047	10	10	10	7	7	7	7	7	7	7	7	7	12	11	11	11	11	11	6	6	6	6	6	6	9	9	9	9	8	8	5	5	5	2	2	2	20.52	22.32
SND1_HUMAN	Q7KZF4	Staphylococcal nuclease domain-containing protein 1 OS=Homo sapiens GN=SND1 PE=1 SV=1	0.466667	0.47	0.830645	0.476387			5.11	0.74	0.003554	9	9	9	24	21	21	17	17	17	8	8	8	13	13	13	20	17	17	12	12	12	16	15	15	14	14	14	13	13	13	12	12	12	2	2	2	20.41	25.77
GEMI5_HUMAN	Q8TEQ6	Gem-associated protein 5 OS=Homo sapiens GN=GEMIN5 PE=1 SV=3	-0.643334	-0.503333	0.690103	0.311849			4	0.74	0.000278	14	13	13	10	8	8	5	5	5	12	11	11	14	13	13	23	18	18	8	8	8	12	11	11	14	13	13	13	12	12	18	16	16	3	3	3	19.67	22.56
BLM_HUMAN	P54132	Bloom syndrome protein OS=Homo sapiens GN=BLM PE=1 SV=1	0.64	0.283334	0.569301	0.473427			1.96	0.48	0.093896	3	3	3	5	5	5	4	3	3	2	2	2	1	1	1	1	1	1	2	1	1	2	1	1	2	1	1	4	2	2	3	2	2	1	1	1	19.6	21.86
RCN1_HUMAN	Q15293	Reticulocalbin-1 OS=Homo sapiens GN=RCN1 PE=1 SV=1	1.07	-1.57	0.521484	0.194459			4.57	0.75	0.000229	6	4	4	9	6	6	13	7	7	7	5	5	4	3	3	10	8	8	2	2	2	4	4	4	6	5	5	7	5	5	7	6	6	1	1	1	21.46	24.73
DJB11_HUMAN	Q9UBS4	DnaJ homolog subfamily B member 11 OS=Homo sapiens GN=DNAJB11 PE=1 SV=1	0.586667	-0.446666	0.750895	0.576642			4.4	0.76	0.011733	2	2	2	3	3	3	3	2	2	2	2	2	2	2	2	2	2	2	7	7	7	8	6	6	7	6	6	4	4	4	10	8	8	1	1	1	18.36	23.22
AMPM1_HUMAN	P53582	Methionine aminopeptidase 1 OS=Homo sapiens GN=METAP1 PE=1 SV=2	2.16849	-1.21667	0.408252	0.189638			3.42	0.66	0.059795	1	1	1	1	1	1	1	1	1	0	0	0	0	0	0	2	1	1	1	1	1	3	3	3	3	3	3	2	2	2	3	2	2	1	1	1	18.45	21.75
1A32_HUMAN	P10314	HLA class I histocompatibility antigen, A-32 alpha chain OS=Homo sapiens GN=HLA-A PE=2 SV=2	1.09334	-1.21963	0.749543	0.585136			4.32	0.74	0.033035	0	0	0	6	4	0	2	2	0	1	1	0	1	1	0	4	3	0	0	0	0	0	0	0	1	1	0	0	0	0	1	1	0	1	1	0	15.15	22.44
1A23_HUMAN	P30447	HLA class I histocompatibility antigen, A-23 alpha chain OS=Homo sapiens GN=HLA-A PE=1 SV=1	2.33955	0.656254	0.497753	0.766888			4.77	0.74	0.00505	0	0	0	5	5	0	3	3	0	1	1	0	0	0	0	3	3	0	0	0	0	1	1	0	2	2	0	0	0	0	0	0	0	1	1	0	17.6867	23.69
1A24_HUMAN	P05534	HLA class I histocompatibility antigen, A-24 alpha chain OS=Homo sapiens GN=HLA-A PE=1 SV=2	1.71329	0.432224	0.612606	0.8606			4.77	0.74	0.00505	0	0	0	5	5	0	3	3	0	1	1	0	0	0	0	3	3	0	0	0	0	1	1	0	2	2	0	0	0	0	0	0	0	1	1	0	16.8187	23.69
1C12_HUMAN	P30508	HLA class I histocompatibility antigen, Cw-12 alpha chain OS=Homo sapiens GN=HLA-C PE=1 SV=2	0.546478	0.242158	0.880981	0.907895			4.99	0.74	0.033035	0	0	0	4	4	0	3	3	0	1	1	0	0	0	0	5	5	0	0	0	0	1	1	0	2	2	0	0	0	0	0	0	0	1	1	0	15.2126	23.47
1C17_HUMAN	Q95604	HLA class I histocompatibility antigen, Cw-17 alpha chain OS=Homo sapiens GN=HLA-C PE=1 SV=1	0.802423	-0.770768	0.786651	0.752764			4.99	0.74	0.193652	0	0	0	2	2	0	2	2	0	1	1	0	0	0	0	3	3	0	0	0	0	0	0	0	1	1	0	0	0	0	0	0	0	1	1	0	16.4328	21.86
HLAH_HUMAN	P01893	Putative HLA class I histocompatibility antigen, alpha chain H OS=Homo sapiens GN=HLA-H PE=5 SV=3	0.66864	1.13033	0.854575	0.647817			3.55	0.74	0.031364	0	0	0	3	3	0	1	1	0	1	1	0	0	0	0	3	3	0	0	0	0	1	1	0	2	2	0	0	0	0	0	0	0	1	1	0	15.4052	23.3
1C02_HUMAN	P30501	HLA class I histocompatibility antigen, Cw-2 alpha chain OS=Homo sapiens GN=HLA-C PE=1 SV=1	1.39551	0.458635	0.664137	0.864991			4.99	0.74	0.2272	0	0	0	2	2	0	2	2	0	1	1	0	0	0	0	2	2	0	0	0	0	1	1	0	2	2	0	0	0	0	0	0	0	1	1	0	15.9434	22.73
NSUN2_HUMAN	Q08J23	tRNA (cytosine(34)-C(5))-methyltransferase OS=Homo sapiens GN=NSUN2 PE=1 SV=2	0.286666	0.0466665	0.845349	0.936204			4.74	0.77	0.025805	6	6	6	9	9	9	11	10	10	7	7	7	6	6	6	7	7	7	9	9	9	9	8	8	14	12	12	10	10	10	8	8	8	2	2	2	19.42	23.09
1A68_HUMAN	P01891	HLA class I histocompatibility antigen, A-68 alpha chain OS=Homo sapiens GN=HLA-A PE=1 SV=4	2.57253	-2.69195	0.552764	0.101675			4.32	0.74	0.006448	0	0	0	11	9	2	5	5	2	1	1	0	1	1	0	8	7	2	1	1	1	0	0	0	1	1	0	1	1	1	2	2	1	1	1	0	16.9276	25.13
1A31_HUMAN	P16189	HLA class I histocompatibility antigen, A-31 alpha chain OS=Homo sapiens GN=HLA-A PE=2 SV=2	1.66524	-0.437184	0.682214	0.859195			4.32	0.74	0.033035	0	0	0	7	5	0	2	2	0	1	1	0	1	1	0	5	4	0	0	0	0	0	0	0	1	1	0	0	0	0	1	1	0	1	1	0	16.6257	24.16
1A33_HUMAN	P16190	HLA class I histocompatibility antigen, A-33 alpha chain OS=Homo sapiens GN=HLA-A PE=1 SV=3	1.45131	-1.90506	0.727601	0.403422			4.32	0.74	0.193652	0	0	0	7	5	0	2	2	0	1	1	0	1	1	0	4	3	0	0	0	0	0	0	0	1	1	0	0	0	0	1	1	0	1	1	0	15.6539	24.29
1A29_HUMAN	P30512	HLA class I histocompatibility antigen, A-29 alpha chain OS=Homo sapiens GN=HLA-A PE=2 SV=2	1.47134	-1.87284	0.653193	0.450645			4.32	0.74	0.033035	0	0	0	6	4	0	2	2	0	1	1	0	1	1	0	4	3	0	0	0	0	0	0	0	1	1	0	0	0	0	1	1	0	1	1	0	16.214	22.37
1A03_HUMAN	P04439	HLA class I histocompatibility antigen, A-3 alpha chain OS=Homo sapiens GN=HLA-A PE=1 SV=2	1.43687	1.17213	0.726922	0.65896			3.55	0.74	0.033035	0	0	0	4	4	0	2	2	0	1	1	0	0	0	0	4	4	0	0	0	0	1	1	0	2	2	0	0	0	0	0	0	0	1	1	0	16.0696	24.5
1A30_HUMAN	P16188	HLA class I histocompatibility antigen, A-30 alpha chain OS=Homo sapiens GN=HLA-A PE=1 SV=2	1.04754	-0.0924689	0.788294	0.970132			3.55	0.74	0.033035	0	0	0	4	4	0	2	2	0	1	1	0	0	0	0	4	4	0	0	0	0	1	1	0	2	2	0	0	0	0	0	0	0	1	1	0	16.2712	24.5
1C15_HUMAN	Q07000	HLA class I histocompatibility antigen, Cw-15 alpha chain OS=Homo sapiens GN=HLA-C PE=1 SV=1	1.0295	1.00728	0.768147	0.692043			4.99	0.74	0.033035	0	0	0	3	3	0	2	2	0	1	1	0	0	0	0	4	4	0	0	0	0	1	1	0	2	2	0	0	0	0	0	0	0	1	1	0	16.0947	22.95
1A36_HUMAN	P30455	HLA class I histocompatibility antigen, A-36 alpha chain OS=Homo sapiens GN=HLA-A PE=2 SV=1	1.34218	0.206918	0.716941	0.933108			3.55	0.74	0.033035	0	0	0	3	3	0	2	2	0	1	1	0	0	0	0	3	3	0	0	0	0	1	1	0	2	2	0	0	0	0	0	0	0	1	1	0	15.4904	23.31
MCM3_HUMAN	P25205	DNA replication licensing factor MCM3 OS=Homo sapiens GN=MCM3 PE=1 SV=3	0.636667	0.136667	0.662984	0.832579			4.62	0.74	0.028013	8	8	8	11	10	10	8	7	7	3	3	3	7	7	7	9	9	9	14	10	10	17	11	11	15	9	9	16	10	10	13	10	10	2	2	2	20.13	23.04
RBM39_HUMAN	Q14498	RNA-binding protein 39 OS=Homo sapiens GN=RBM39 PE=1 SV=2	0.413333	1.36667	0.698079	0.14561			4.18	0.68	0.020575	4	4	4	4	4	4	4	4	4	4	4	4	4	4	4	3	3	3	6	5	5	6	5	5	5	4	4	2	1	1	1	1	1	1	1	1	20.48	23.19
COPA_HUMAN	P53621	Coatomer subunit alpha OS=Homo sapiens GN=COPA PE=1 SV=2	-0.0366669	0.116667	0.984809	0.841855			4.66	0.7	0.001916	10	8	8	15	15	15	10	9	9	15	15	15	15	14	14	23	23	23	12	12	12	18	18	18	12	12	12	13	13	13	11	11	11	2	2	2	19.21	23.52
ASNA_HUMAN	O43681	ATPase ASNA1 OS=Homo sapiens GN=ASNA1 PE=1 SV=2	0.703333	-0.846666	0.585029	0.201644			2.95	0.61	0.003845	3	3	3	2	2	2	3	3	3	2	2	2	2	2	2	2	2	2	1	1	1	4	3	3	3	2	2	2	2	2	4	3	3	1	1	1	19.95	21.03
1A69_HUMAN	P10316	HLA class I histocompatibility antigen, A-69 alpha chain OS=Homo sapiens GN=HLA-A PE=1 SV=2	2.00592	-1.36797	0.640214	0.601803			4.77	0.74	0.00505	0	0	0	11	9	0	4	4	0	1	1	0	1	1	0	6	5	0	0	0	0	0	0	0	1	1	0	0	0	0	1	1	0	1	1	0	15.4778	24.64
1A02_HUMAN	P01892	HLA class I histocompatibility antigen, A-2 alpha chain OS=Homo sapiens GN=HLA-A PE=1 SV=1	1.91525	-0.453645	0.653209	0.829103			4.77	0.74	0.00505	0	0	0	10	8	0	4	4	0	1	1	0	1	1	0	6	5	0	0	0	0	0	0	0	1	1	0	0	0	0	1	1	0	1	1	0	15.3857	24.46
1A34_HUMAN	P30453	HLA class I histocompatibility antigen, A-34 alpha chain OS=Homo sapiens GN=HLA-A PE=1 SV=1	1.63531	0.0256316	0.694274	0.991807			4.32	0.74	0.033035	0	0	0	8	6	0	2	2	0	1	1	0	1	1	0	5	4	0	0	0	0	0	0	0	1	1	0	0	0	0	1	1	0	1	1	0	16.2459	24.32
1A25_HUMAN	P18462	HLA class I histocompatibility antigen, A-25 alpha chain OS=Homo sapiens GN=HLA-A PE=2 SV=1	1.69396	-0.335208	0.623228	0.883447			4.32	0.74	0.033035	0	0	0	7	5	0	2	2	0	1	1	0	1	1	0	4	3	0	0	0	0	0	0	0	1	1	0	0	0	0	1	1	0	1	1	0	16.1419	22.98
1A74_HUMAN	P30459	HLA class I histocompatibility antigen, A-74 alpha chain OS=Homo sapiens GN=HLA-A PE=1 SV=1	2.0847	-1.42875	0.599152	0.556778			4.32	0.74	0.033035	0	0	0	7	5	0	2	2	0	1	1	0	1	1	0	5	4	0	0	0	0	0	0	0	1	1	0	0	0	0	1	1	0	1	1	0	17.8241	24.09
1A11_HUMAN	P13746	HLA class I histocompatibility antigen, A-11 alpha chain OS=Homo sapiens GN=HLA-A PE=1 SV=1	1.685	0.990582	0.679478	0.687168			3.55	0.74	0.033035	0	0	0	4	4	0	2	2	0	1	1	0	0	0	0	4	4	0	0	0	0	1	1	0	2	2	0	0	0	0	0	0	0	1	1	0	16.54	24.43
1A01_HUMAN	P30443	HLA class I histocompatibility antigen, A-1 alpha chain OS=Homo sapiens GN=HLA-A PE=1 SV=1	0.660664	0.876782	0.869146	0.696688			3.55	0.74	0.033035	0	0	0	3	3	0	2	2	0	1	1	0	0	0	0	3	3	0	0	0	0	1	1	0	2	2	0	0	0	0	0	0	0	1	1	0	13.5704	23.24
MYG1_HUMAN	Q9HB07	UPF0160 protein MYG1, mitochondrial OS=Homo sapiens GN=C12orf10 PE=1 SV=2	1.26994	-1.39667	0.338767	0.381744			2.94	0.61	0.218823	2	2	2	1	1	1	1	1	1	0	0	0	0	0	0	1	1	1	1	1	1	5	5	5	2	2	2	2	2	2	1	1	1	1	1	1	16.58	19.43
AATM_HUMAN	P00505	Aspartate aminotransferase, mitochondrial OS=Homo sapiens GN=GOT2 PE=1 SV=3	2.14869	-0.00333341	0.672004	0.99716			6.78	0.68	0.013899	0	0	0	31	16	16	4	4	4	0	0	0	0	0	0	7	7	7	3	3	3	10	9	9	8	7	7	4	4	4	5	5	5	1	1	1	15.4591	27.87
KCRU_HUMAN	P12532	Creatine kinase U-type, mitochondrial OS=Homo sapiens GN=CKMT1A PE=1 SV=1	-0.0468477	-1.18667	0.970215	0.0500657			2.19	0.5	0.072569	1	1	1	1	1	1	0	0	0	1	1	1	1	1	1	0	0	0	1	1	1	2	2	2	1	1	1	1	1	1	1	1	1	1	1	1	17.91	20.31
1A66_HUMAN	P30457	HLA class I histocompatibility antigen, A-66 alpha chain OS=Homo sapiens GN=HLA-A PE=2 SV=1	1.38965	-0.655646	0.743743	0.766031			4.32	0.74	0.033035	0	0	0	8	6	0	2	2	0	1	1	0	1	1	0	5	4	0	0	0	0	0	0	0	1	1	0	0	0	0	1	1	0	1	1	0	15.439	24.26
1A26_HUMAN	P30450	HLA class I histocompatibility antigen, A-26 alpha chain OS=Homo sapiens GN=HLA-A PE=2 SV=2	1.56401	-0.889918	0.654133	0.66978			4.32	0.74	0.033035	0	0	0	7	5	0	2	2	0	1	1	0	1	1	0	4	3	0	0	0	0	0	0	0	1	1	0	0	0	0	1	1	0	1	1	0	15.692	22.91
1A43_HUMAN	P30456	HLA class I histocompatibility antigen, A-43 alpha chain OS=Homo sapiens GN=HLA-A PE=2 SV=1	1.13846	-0.539132	0.738073	0.808246			4.32	0.74	0.033035	0	0	0	6	4	0	2	2	0	1	1	0	1	1	0	4	3	0	0	0	0	0	0	0	1	1	0	0	0	0	1	1	0	1	1	0	15.0854	22.24
PHF6_HUMAN	Q8IWS0	PHD finger protein 6 OS=Homo sapiens GN=PHF6 PE=1 SV=1	1.60861	-0.993333	0.542369	0.264393			2.56	0.68	0.006478	0	0	0	1	1	1	2	1	1	2	2	2	0	0	0	0	0	0	3	2	2	3	3	3	2	2	2	2	2	2	3	3	3	1	1	1	14.3465	20.71
MCM4_HUMAN	P33991	DNA replication licensing factor MCM4 OS=Homo sapiens GN=MCM4 PE=1 SV=5	0.73	-0.466667	0.568861	0.454031			4.24	0.71	0.022727	5	5	5	4	4	4	2	2	2	3	3	3	3	3	3	4	4	4	6	6	6	9	8	8	6	6	6	8	7	7	9	8	8	2	2	2	19.61	21.46
CSN2_HUMAN	P61201	COP9 signalosome complex subunit 2 OS=Homo sapiens GN=COPS2 PE=1 SV=1	0.786667	-0.87	0.67447	0.232818			3.74	0.62	0.033301	1	1	1	2	2	2	2	2	2	1	1	1	1	1	1	3	3	3	3	3	3	6	6	6	5	5	5	5	5	5	6	5	5	1	1	1	17.65	21.44
PRP31_HUMAN	Q8WWY3	U4/U6 small nuclear ribonucleoprotein Prp31 OS=Homo sapiens GN=PRPF31 PE=1 SV=2	-0.642229	-3.41836	0.594479	0.165226			3.15	0.69	0.317175	0	0	0	0	0	0	1	1	1	1	1	1	1	1	1	0	0	0	1	1	1	0	0	0	2	2	2	3	3	3	3	3	3	1	1	1	16.2148	14.5567
CT043_HUMAN	Q9BY42	UPF0549 protein C20orf43 OS=Homo sapiens GN=C20orf43 PE=1 SV=3	0.296667	-0.706667	0.732735	0.307958			3.84	0.77	0.325444	2	2	2	3	3	3	2	2	2	2	2	2	2	2	2	2	2	2	1	1	1	2	2	2	2	2	2	2	2	2	1	1	1	1	1	1	18.27	20.46
FUBP1_HUMAN	Q96AE4	Far upstream element-binding protein 1 OS=Homo sapiens GN=FUBP1 PE=1 SV=3	-0.196667	-0.383333	0.869898	0.605791			4.22	0.7	0.002347	3	3	2	2	2	2	4	4	2	4	4	3	5	3	3	4	4	4	4	4	3	4	4	4	3	3	3	7	6	6	5	5	5	1	1	1	20.71	22.7
HDAC2_HUMAN	Q92769	Histone deacetylase 2 OS=Homo sapiens GN=HDAC2 PE=1 SV=2	-0.106667	0.476667	0.945965	0.658488	Q92769		4.57	0.7	0.061201	3	3	0	2	2	0	2	2	1	3	3	2	2	2	1	3	3	1	7	7	3	6	6	3	13	8	4	7	7	4	9	9	4	2	2	1	19.65	23.16
IQGA2_HUMAN	Q13576	Ras GTPase-activating-like protein IQGAP2 OS=Homo sapiens GN=IQGAP2 PE=1 SV=4	-0.106667	-0.47	0.959315	0.651915			2.3	0.54	0.052062	3	3	0	7	7	2	2	2	0	2	2	0	3	3	0	5	5	1	1	1	0	2	2	0	1	1	0	1	1	0	1	1	0	2	2	0	17.97	22.08
CPSF7_HUMAN	Q8N684	Cleavage and polyadenylation specificity factor subunit 7 OS=Homo sapiens GN=CPSF7 PE=1 SV=1	0.233334	0.0433337	0.846723	0.943669			3.97	0.68	0.024225	4	4	4	2	2	2	3	3	3	3	3	3	3	3	3	3	3	3	6	6	6	5	5	5	6	5	5	4	4	4	4	4	4	1	1	1	20.53	22.83
CMS1_HUMAN	Q9BQ75	Protein CMSS1 OS=Homo sapiens GN=CMSS1 PE=1 SV=2	-0.00333277	-0.453333	0.998209	0.592346			3.12	0.66	0.003213	4	3	3	3	3	3	5	4	4	3	3	3	4	3	3	4	3	3	3	3	3	3	3	3	4	3	3	6	5	5	4	4	4	1	1	1	19.94	23.04
CLPB_HUMAN	Q9H078	Caseinolytic peptidase B protein homolog OS=Homo sapiens GN=CLPB PE=1 SV=1	0.906667	-0.25	0.426335	0.669608			3.73	0.69	0.029083	2	2	2	3	3	3	3	3	3	2	2	2	1	1	1	2	2	2	5	5	5	6	6	6	7	7	7	7	7	7	7	7	7	1	1	1	18.03	21.23
CRTAP_HUMAN	O75718	Cartilage-associated protein OS=Homo sapiens GN=CRTAP PE=1 SV=1	-0.206667	-0.673333	0.909078	0.372269			2.63	0.7	0.107832	1	1	1	2	2	2	2	2	2	3	3	3	1	1	1	4	4	4	3	3	3	5	5	5	2	2	2	2	2	2	3	3	3	1	1	1	17.58	21.3
FA50A_HUMAN	Q14320	Protein FAM50A OS=Homo sapiens GN=FAM50A PE=1 SV=2	0.926667	-1.09333	0.677262	0.256186			4.56	0.69	0.117881	2	1	1	5	3	2	4	2	1	3	1	1	1	1	1	5	4	2	1	1	1	3	3	1	4	4	2	3	2	1	3	2	1	1	1	1	18.89	23
HDAC1_HUMAN	Q13547	Histone deacetylase 1 OS=Homo sapiens GN=HDAC1 PE=1 SV=1	0.206667	0.629999	0.904114	0.526959	Q13547		4.49	0.7	0.061201	3	3	0	2	2	0	1	1	0	1	1	0	1	1	0	2	2	0	7	7	3	5	5	2	8	5	1	4	4	1	6	6	1	1	1	0	19.6	23.1
PSB2_HUMAN	P49721	Proteasome subunit beta type-2 OS=Homo sapiens GN=PSMB2 PE=1 SV=1	0.18	-0.699999	0.908506	0.487473			3.12	0.75	0.007061	4	4	4	5	4	4	8	7	7	6	5	5	6	5	5	7	6	6	5	5	5	6	5	5	6	4	4	7	5	5	7	7	7	1	1	1	20.53	23.81
K6PF_HUMAN	P08237	6-phosphofructokinase, muscle type OS=Homo sapiens GN=PFKM PE=1 SV=2	0.27	-0.0433331	0.840315	0.940792			3.22	0.66	0.064321	5	5	5	3	3	2	2	2	2	2	2	2	5	5	4	4	4	4	4	4	4	6	6	5	4	4	3	6	6	5	7	7	6	2	2	2	19.87	21.86
TRIM4_HUMAN	Q9C037	Tripartite motif-containing protein 4 OS=Homo sapiens GN=TRIM4 PE=2 SV=2	-3.09471	-0.869314	0.530176	0.706487			2.02	0.35	0.012387	1	1	1	1	1	1	0	0	0	1	1	1	2	1	1	2	1	1	0	0	0	1	1	1	1	1	1	0	0	0	1	1	1	1	1	1	16.29	24.95
AMPM2_HUMAN	P50579	Methionine aminopeptidase 2 OS=Homo sapiens GN=METAP2 PE=1 SV=1	0.466667	0.190001	0.771004	0.760242			5.34	0.81	0.003066	3	3	3	5	5	5	4	4	4	5	5	5	3	3	3	4	3	3	8	6	6	6	6	6	11	6	6	7	6	6	7	6	6	1	1	1	18.41	22.28
ENPLL_HUMAN	Q58FF3	Putative endoplasmin-like protein OS=Homo sapiens GN=HSP90B2P PE=5 SV=1	1.76152	-0.52	0.432863	0.657152			2.84	0.58	0.048427	3	3	0	3	3	0	1	1	0	2	2	0	0	0	0	1	1	0	3	3	0	3	2	0	4	3	0	6	4	0	5	3	0	1	1	0	20.67	24.11
LKHA4_HUMAN	P09960	Leukotriene A-4 hydrolase OS=Homo sapiens GN=LTA4H PE=1 SV=2	0.983333	-1.32	0.230746	0.491447			3.3	0.58	0.005928	4	4	4	1	1	1	1	1	1	1	1	1	1	1	1	1	1	1	2	2	2	7	7	7	1	1	1	5	3	3	2	2	2	1	1	1	18.7	19.67
AMPL_HUMAN	P28838	Cytosol aminopeptidase OS=Homo sapiens GN=LAP3 PE=1 SV=3	1.53027	-1.01437	0.630069	0.43878			3.85	0.64	0.024991	1	1	1	7	7	7	0	0	0	0	0	0	0	0	0	2	2	2	0	0	0	4	4	4	4	4	4	2	2	2	2	2	2	1	1	1	15.41	23.26
2ABA_HUMAN	P63151	Serine/threonine-protein phosphatase 2A 55 kDa regulatory subunit B alpha isoform OS=Homo sapiens GN=PPP2R2A PE=1 SV=1	-0.38	0.0166664	0.830273	0.982798			4.3	0.71	0.002658	2	2	2	1	1	1	2	2	1	1	1	1	3	3	2	4	4	4	5	5	4	6	6	4	4	4	3	4	4	2	5	5	4	1	1	1	18.28	21.49
ERP44_HUMAN	Q9BS26	Endoplasmic reticulum resident protein 44 OS=Homo sapiens GN=ERP44 PE=1 SV=1	0.763334	-0.953334	0.697993	0.135417			2.31	0.55	0.000755	1	1	1	2	2	2	1	1	1	1	1	1	1	1	1	1	1	1	2	2	2	2	2	2	2	2	2	3	2	2	3	3	3	1	1	1	18.11	22.28
RAB5C_HUMAN	P51148	Ras-related protein Rab-5C OS=Homo sapiens GN=RAB5C PE=1 SV=2	0.85	-0.986666	0.770539	0.375993			3.88	0.78	0.026113	4	4	2	10	8	4	6	5	2	4	4	2	4	4	2	10	7	3	2	2	1	3	3	2	3	3	2	4	3	1	5	5	2	1	1	1	20.44	27.2
TNPO1_HUMAN	Q92973	Transportin-1 OS=Homo sapiens GN=TNPO1 PE=1 SV=2	0.199999	1.13	0.895272	0.107661			3.85	0.69	0.015685	7	6	3	3	3	3	7	6	4	4	4	3	8	6	4	7	6	4	10	7	5	14	11	7	12	9	5	6	4	1	10	8	4	1	1	1	19.21	22.78
KPRB_HUMAN	O60256	Phosphoribosyl pyrophosphate synthase-associated protein 2 OS=Homo sapiens GN=PRPSAP2 PE=1 SV=1	2.69251	-1.41667	0.0896346	0.176484			2.96	0.58	0.069205	1	1	0	1	1	0	4	4	3	1	1	1	1	1	1	0	0	0	2	2	2	5	5	4	4	4	4	3	3	2	4	4	3	1	1	1	16.44	19.86
GLYM_HUMAN	P34897	Serine hydroxymethyltransferase, mitochondrial OS=Homo sapiens GN=SHMT2 PE=1 SV=3	1.79184	1.39333	0.731397	0.22023			5.32	0.76	0.009535	0	0	0	45	29	27	6	5	5	0	0	0	0	0	0	18	16	14	5	5	5	16	14	13	13	11	10	4	4	4	4	4	4	1	1	1	15.5788	28.77
RAGP1_HUMAN	P46060	Ran GTPase-activating protein 1 OS=Homo sapiens GN=RANGAP1 PE=1 SV=1	0.35	0.373334	0.699529	0.522868			4.4	0.73	0.016512	7	6	6	4	4	4	4	4	4	8	7	7	5	5	5	4	4	4	6	4	4	10	8	8	8	7	7	4	4	4	8	6	6	1	1	1	20.61	22.46
BAZ1A_HUMAN	Q9NRL2	Bromodomain adjacent to zinc finger domain protein 1A OS=Homo sapiens GN=BAZ1A PE=1 SV=2	0.0290337	-1.84333	0.96496	0.171747			3.49	0.69	0.023634	2	2	2	1	1	1	3	2	2	2	2	2	2	2	2	0	0	0	2	2	2	1	1	1	2	2	2	3	3	3	2	2	2	1	1	1	15.06	17.14
PYRG2_HUMAN	Q9NRF8	CTP synthase 2 OS=Homo sapiens GN=CTPS2 PE=1 SV=1	1.1204	-0.256667	0.221286	0.57417			3.94	0.63	0.038061	1	1	0	1	1	0	1	1	0	1	1	0	1	1	0	0	0	0	3	3	2	1	1	0	1	1	0	1	1	0	1	1	0	1	1	0	18.68	20.18
NOC4L_HUMAN	Q9BVI4	Nucleolar complex protein 4 homolog OS=Homo sapiens GN=NOC4L PE=1 SV=1	0.632112	-0.983334	0.789496	0.0503444			2.85	0.56	0.115066	1	1	1	2	2	2	1	1	1	1	1	1	0	0	0	3	3	3	3	3	3	2	2	2	2	2	2	2	2	2	3	3	3	1	1	1	16.71	21.61
SMCA2_HUMAN	P51531	Probable global transcription activator SNF2L2 OS=Homo sapiens GN=SMARCA2 PE=1 SV=2	-0.13	-0.88	0.927626	0.0538292	P51531		3.94	0.72	0.005535	5	4	0	6	6	0	6	6	0	5	5	0	5	5	0	9	8	0	4	4	0	4	4	0	6	5	0	5	4	0	5	5	0	2	2	0	17.22	20.42
NOLC1_HUMAN	Q14978	Nucleolar and coiled-body phosphoprotein 1 OS=Homo sapiens GN=NOLC1 PE=1 SV=2	3.07	-1.73296	0.132048	0.237789			3.59	0.65	0.044552	3	3	3	6	4	4	3	2	2	1	1	1	2	2	2	2	2	2	3	2	2	0	0	0	3	3	3	5	4	4	3	3	3	1	1	1	19.6	22.81
RGAP1_HUMAN	Q9H0H5	Rac GTPase-activating protein 1 OS=Homo sapiens GN=RACGAP1 PE=1 SV=1	0.0666669	0.68	0.950731	0.303053	Q9H0H5		3.94	0.75	0.003559	5	5	5	3	3	3	2	2	2	5	5	5	4	4	4	4	4	4	8	7	7	6	6	6	7	7	7	7	7	7	8	8	8	1	1	1	20.75	22.46
SYVC_HUMAN	P26640	Valine--tRNA ligase OS=Homo sapiens GN=VARS PE=1 SV=4	-0.416666	-0.173333	0.821218	0.789934			4.42	0.77	0.001973	4	4	4	6	6	6	6	6	6	10	10	10	7	7	7	18	15	15	8	8	8	10	10	10	9	9	9	12	11	11	14	13	13	2	2	2	18.38	22.45
REN3B_HUMAN	Q9BZI7	Regulator of nonsense transcripts 3B OS=Homo sapiens GN=UPF3B PE=1 SV=1	-0.343332	-0.993333	0.85794	0.173055			3.25	0.64	0.00027	4	4	4	3	3	3	1	1	1	2	2	2	1	1	1	3	3	3	5	5	5	3	3	3	4	3	3	4	4	4	4	4	4	1	1	1	19.84	21.54
P4HA1_HUMAN	P13674	Prolyl 4-hydroxylase subunit alpha-1 OS=Homo sapiens GN=P4HA1 PE=1 SV=2	-0.196667	-0.856667	0.901929	0.167142			3.39	0.73	0.03542	1	1	1	2	2	2	2	2	2	1	1	1	2	2	2	2	2	2	4	4	4	7	7	7	9	8	8	6	6	6	7	7	7	1	1	1	16.42	20.26
STK24_HUMAN	Q9Y6E0	Serine/threonine-protein kinase 24 OS=Homo sapiens GN=STK24 PE=1 SV=1	-1.55153	-0.926666	0.545286	0.171604			2.91	0.56	0.050172	0	0	0	1	1	0	0	0	0	1	1	0	0	0	0	1	1	0	1	1	0	3	3	0	1	1	0	1	1	0	2	2	0	1	1	0	14.9754	21.43
YTHD2_HUMAN	Q9Y5A9	YTH domain family protein 2 OS=Homo sapiens GN=YTHDF2 PE=1 SV=2	0.376666	-0.476667	0.75482	0.394159			4.41	0.73	0.064539	5	4	2	3	3	2	6	4	2	4	4	2	4	4	2	3	3	2	5	4	2	1	1	1	4	4	1	4	3	1	4	3	1	1	1	0	20.4	22.89
IF2B3_HUMAN	O00425	Insulin-like growth factor 2 mRNA-binding protein 3 OS=Homo sapiens GN=IGF2BP3 PE=1 SV=2	0.236666	1.00333	0.850438	0.100978			4.45	0.71	0.058663	4	4	3	4	4	3	2	2	1	4	3	2	4	3	1	5	4	3	7	6	5	5	4	3	5	4	2	2	2	0	2	2	1	1	1	0	20.25	22.77
TR150_HUMAN	Q9Y2W1	Thyroid hormone receptor-associated protein 3 OS=Homo sapiens GN=THRAP3 PE=1 SV=2	0.9	0.476667	0.63513	0.457256			5.41	0.76	0.003909	13	10	10	13	9	9	13	10	10	10	9	9	6	5	5	17	13	12	6	6	6	8	8	8	10	10	10	4	4	4	7	7	7	1	1	1	20.47	23.38
YTHD1_HUMAN	Q9BYJ9	YTH domain family protein 1 OS=Homo sapiens GN=YTHDF1 PE=1 SV=1	0.170001	-1.86208	0.872434	0.251847			4.97	0.73	0.064539	4	3	0	2	2	1	5	3	1	3	3	0	3	3	0	3	3	1	4	3	0	0	0	0	2	2	0	2	1	0	2	1	0	1	1	0	19.87	21.01
IF2B1_HUMAN	Q9NZI8	Insulin-like growth factor 2 mRNA-binding protein 1 OS=Homo sapiens GN=IGF2BP1 PE=1 SV=2	-0.256666	0.606667	0.835674	0.333206			2.82	0.63	0.151248	3	3	2	2	2	1	2	2	1	3	2	1	4	3	1	5	4	3	5	5	4	3	2	1	4	4	2	3	3	1	1	1	0	1	1	0	19.45	21.76
MK03_HUMAN	P27361	Mitogen-activated protein kinase 3 OS=Homo sapiens GN=MAPK3 PE=1 SV=4	0.120001	-2.60781	0.935705	0.164358			3.06	0.61	0.377283	1	1	0	1	1	0	1	1	0	2	2	0	1	1	0	1	1	0	0	0	0	1	1	0	1	1	0	1	1	0	1	1	0	1	1	0	15.79	19.8
MBD3_HUMAN	O95983	Methyl-CpG-binding domain protein 3 OS=Homo sapiens GN=MBD3 PE=1 SV=1	0.46	-1.71	0.605611	0.105065			2.5	0.74	0.013034	2	2	2	1	1	1	4	4	3	2	2	2	1	1	1	1	1	1	1	1	1	2	2	1	1	1	1	2	2	2	1	1	1	1	1	1	17.89	19.12
ATPB_HUMAN	P06576	ATP synthase subunit beta, mitochondrial OS=Homo sapiens GN=ATP5B PE=1 SV=3	-0.342573	-1.29667	0.947646	0.331118			6.02	0.78	0.000338	0	0	0	104	32	32	35	23	23	8	8	8	17	15	15	41	29	29	1	1	1	7	7	7	6	6	6	6	5	5	3	3	3	1	1	1	15.7723	31.02
BAIP2_HUMAN	Q9UQB8	Brain-specific angiogenesis inhibitor 1-associated protein 2 OS=Homo sapiens GN=BAIAP2 PE=1 SV=1	0.838479	-4.20629	0.593075	0.0564321			2.88	0.67	0.039791	1	1	1	1	1	1	0	0	0	0	0	0	0	0	0	0	0	0	2	2	2	0	0	0	1	1	1	4	4	4	4	4	4	1	1	1	16.88	19.28
YTHD3_HUMAN	Q7Z739	YTH domain family protein 3 OS=Homo sapiens GN=YTHDF3 PE=1 SV=1	0.216666	-2.04265	0.829751	0.295551			4.97	0.73	0.064539	4	3	0	1	1	0	5	3	0	3	3	0	3	3	0	2	2	0	5	4	1	0	0	0	3	3	0	3	2	0	3	2	0	1	1	0	19.8	20.43
DHB4_HUMAN	P51659	Peroxisomal multifunctional enzyme type 2 OS=Homo sapiens GN=HSD17B4 PE=1 SV=3	1.14	-0.776666	0.299762	0.358707			4.04	0.73	0.015733	11	9	9	8	8	8	5	5	5	7	6	6	7	6	6	6	6	6	9	7	7	8	6	6	5	4	4	11	6	6	9	7	7	1	1	1	20.81	22.36
WDR5_HUMAN	P61964	WD repeat-containing protein 5 OS=Homo sapiens GN=WDR5 PE=1 SV=1	-0.839721	0.576667	0.638235	0.511112			3.75	0.69	0.075803	0	0	0	1	1	1	5	4	4	3	3	3	2	2	2	2	2	2	2	2	2	5	4	4	5	4	4	2	2	2	4	3	3	1	1	1	15.7008	20.65
NU155_HUMAN	O75694	Nuclear pore complex protein Nup155 OS=Homo sapiens GN=NUP155 PE=1 SV=1	-0.646666	0.113334	0.646533	0.848392			4.65	0.76	0.002617	7	7	7	7	7	7	6	5	5	13	11	11	12	12	12	16	15	15	11	11	11	12	11	11	13	12	12	10	9	9	11	10	10	1	1	1	19.12	22.18
PUR9_HUMAN	P31939	Bifunctional purine biosynthesis protein PURH OS=Homo sapiens GN=ATIC PE=1 SV=3	0.48	-0.123333	0.649822	0.89016			4.05	0.72	0.047881	4	4	4	4	4	4	4	4	4	4	4	4	5	5	5	4	4	4	5	5	5	7	6	6	7	7	7	6	6	6	7	7	7	1	1	1	19.62	21.7
SAFB1_HUMAN	Q15424	Scaffold attachment factor B1 OS=Homo sapiens GN=SAFB PE=1 SV=4	-1.02333	0.0866661	0.450158	0.878269			5.2	0.73	0.036629	7	7	4	2	2	2	5	5	4	8	8	4	9	8	4	12	12	7	9	9	2	4	4	1	6	6	2	5	5	1	3	3	1	1	1	0	19.2	21.36
CAND1_HUMAN	Q86VP6	Cullin-associated NEDD8-dissociated protein 1 OS=Homo sapiens GN=CAND1 PE=1 SV=2	0.499626	-1.4	0.831733	0.450024			3.21	0.65	0.006981	2	2	2	4	4	4	2	2	2	1	1	1	0	0	0	6	6	6	1	1	1	10	10	9	5	5	5	8	7	6	3	3	3	1	1	1	16.73	20.47
MCM2_HUMAN	P49736	DNA replication licensing factor MCM2 OS=Homo sapiens GN=MCM2 PE=1 SV=4	2.63567	-0.0700003	0.317324	0.933907			4.35	0.67	0.001751	6	6	6	2	2	2	3	3	3	0	0	0	1	1	1	6	6	6	4	4	4	9	9	9	7	7	7	6	6	6	4	4	4	1	1	1	19.09	20.75
AP2B1_HUMAN	P63010	AP-2 complex subunit beta OS=Homo sapiens GN=AP2B1 PE=1 SV=1	0.0600007	0.283334	0.982617	0.582266			4.52	0.72	0.022206	3	3	3	14	14	8	5	5	4	3	3	2	5	5	3	18	16	11	6	6	5	8	8	5	6	6	4	5	5	3	6	6	4	1	1	0	18.35	24.79
AP1B1_HUMAN	Q10567	AP-1 complex subunit beta-1 OS=Homo sapiens GN=AP1B1 PE=1 SV=2	-0.675141	-0.506667	0.83718	0.461726			3.78	0.72	0.022882	0	0	0	6	6	0	1	1	0	1	1	0	2	2	0	8	7	2	2	2	1	4	4	1	3	3	1	3	3	1	3	3	1	1	1	0	14.8846	23.26
NOG1_HUMAN	Q9BZE4	Nucleolar GTP-binding protein 1 OS=Homo sapiens GN=GTPBP4 PE=1 SV=3	0.973333	1.84333	0.513982	0.0779035			4.8	0.73	0.0045	10	9	9	12	10	10	13	11	11	11	9	9	6	5	5	9	7	7	13	12	12	12	11	11	19	16	16	6	5	5	4	4	4	1	1	1	20.39	23.94
XPO1_HUMAN	O14980	Exportin-1 OS=Homo sapiens GN=XPO1 PE=1 SV=1	-0.606667	-0.309999	0.661445	0.75405			4.3	0.67	0.009853	5	5	5	4	4	4	1	1	1	5	5	5	4	4	4	9	9	9	3	3	3	9	8	8	4	4	4	6	5	5	4	4	4	1	1	1	19.32	21.58
DNJA2_HUMAN	O60884	DnaJ homolog subfamily A member 2 OS=Homo sapiens GN=DNAJA2 PE=1 SV=1	0.0333335	-0.47	0.985955	0.553253			3.22	0.65	0.005342	2	1	1	3	3	3	4	4	4	2	2	2	4	3	3	5	4	4	3	3	3	7	6	6	6	5	5	5	5	5	8	7	7	1	1	1	17.03	21.67
VATA_HUMAN	P38606	V-type proton ATPase catalytic subunit A OS=Homo sapiens GN=ATP6V1A PE=1 SV=2	0.19	-0.263333	0.883721	0.791401			3.42	0.71	0.007667	3	3	3	3	3	3	3	3	3	3	3	3	2	2	2	3	3	3	3	3	3	5	5	5	2	2	2	4	4	4	3	3	3	1	1	1	18.2	20.9
BOP1_HUMAN	Q14137	Ribosome biogenesis protein BOP1 OS=Homo sapiens GN=BOP1 PE=1 SV=2	1.32333	0.0366675	0.528894	0.968889			3.23	0.67	0.02367	3	3	3	3	3	3	3	3	3	2	2	2	1	1	1	4	4	4	2	2	2	3	3	3	3	3	3	3	3	3	1	1	1	1	1	1	19.05	23.08
NKRF_HUMAN	O15226	NF-kappa-B-repressing factor OS=Homo sapiens GN=NKRF PE=1 SV=2	0.326667	0.623334	0.817984	0.499174			3.34	0.6	0.014992	4	4	4	4	4	4	2	2	2	3	3	3	4	4	4	3	3	3	10	10	10	13	13	13	9	9	9	10	10	10	10	10	10	1	1	1	19.36	22.49
RMXL2_HUMAN	O75526	RNA-binding motif protein, X-linked-like-2 OS=Homo sapiens GN=RBMXL2 PE=1 SV=3	1.87232	-1.03667	0.501318	0.33445			2.92	0.7	0.015053	3	2	0	1	1	0	2	2	0	2	2	0	0	0	0	3	2	0	4	2	0	4	3	0	3	2	0	2	1	0	3	2	0	1	1	0	20.31	22.89
ASXL1_HUMAN	Q8IXJ9	Putative Polycomb group protein ASXL1 OS=Homo sapiens GN=ASXL1 PE=1 SV=3	0	-2.2542	1	0.35008			1.49	0.35	1.43785	0	0	0	0	0	0	0	0	0	0	0	0	0	0	0	0	0	0	0	0	0	1	1	1	1	1	1	1	1	1	2	1	1	1	1	1	15.9182	17.3177
ACTN2_HUMAN	P35609	Alpha-actinin-2 OS=Homo sapiens GN=ACTN2 PE=1 SV=1	-1.45333	-0.0333335	0.653519	0.977173			4.93	0.77	0.018518	1	1	0	9	8	0	2	2	0	4	4	0	1	1	0	11	10	0	3	2	0	5	4	0	4	4	0	4	4	0	2	2	0	2	2	0	15.48	23.04
CN37_HUMAN	P09543	2',3'-cyclic-nucleotide 3'-phosphodiesterase OS=Homo sapiens GN=CNP PE=1 SV=2	1.93703	-0.403333	0.463736	0.576229			3.71	0.7	0.031555	1	1	1	5	5	5	0	0	0	1	1	1	0	0	0	1	1	1	4	4	4	4	4	4	8	8	8	5	5	5	6	6	6	1	1	1	15.89	22.73
ENOG_HUMAN	P09104	Gamma-enolase OS=Homo sapiens GN=ENO2 PE=1 SV=3	0.909999	0.766667	0.554328	0.65027			4.27	0.69	0.0081	5	1	0	7	2	0	6	1	0	6	1	0	6	1	0	4	1	0	2	2	0	5	2	0	4	1	0	2	1	0	6	2	0	1	1	0	22.32	25.92
DDX23_HUMAN	Q9BUQ8	Probable ATP-dependent RNA helicase DDX23 OS=Homo sapiens GN=DDX23 PE=1 SV=3	0.199999	0.59	0.865215	0.561906			4.34	0.71	0.025648	8	8	8	6	6	6	8	8	8	11	11	11	8	8	8	6	6	6	14	14	14	11	10	10	10	10	10	13	13	13	11	11	11	1	1	1	20.13	22.92
COPB_HUMAN	P53618	Coatomer subunit beta OS=Homo sapiens GN=COPB1 PE=1 SV=3	-0.699999	-0.133334	0.715245	0.880027			4.04	0.65	0.056265	1	1	1	4	3	3	3	3	3	3	3	3	2	2	2	8	7	7	4	4	4	9	8	8	5	5	5	7	6	6	4	4	4	1	1	1	16.28	19.92
ATPA_HUMAN	P25705	ATP synthase subunit alpha, mitochondrial OS=Homo sapiens GN=ATP5A1 PE=1 SV=1	0.159206	-0.103333	0.974369	0.920333			6.42	0.79	0.003144	0	0	0	83	30	30	30	19	19	11	9	9	14	13	13	43	25	25	1	1	1	4	4	4	6	6	6	4	4	4	2	2	2	1	1	1	16.5376	30.72
ENOB_HUMAN	P13929	Beta-enolase OS=Homo sapiens GN=ENO3 PE=1 SV=5	0.973333	0.236667	0.528523	0.861646			4.27	0.69	0.0081	7	3	2	9	4	2	7	2	1	6	1	0	6	1	0	5	2	1	2	2	0	8	5	3	7	4	3	4	3	2	9	5	3	1	1	0	22.4	25.93
CSDE1_HUMAN	O75534	Cold shock domain-containing protein E1 OS=Homo sapiens GN=CSDE1 PE=1 SV=2	0.273333	0.446667	0.866136	0.61394			3.94	0.71	0.020909	11	11	11	13	12	12	11	11	11	7	7	7	10	10	10	14	14	14	10	10	10	16	14	14	11	9	9	12	12	12	10	10	10	1	1	1	20.39	24.01
SK2L2_HUMAN	P42285	Superkiller viralicidic activity 2-like 2 OS=Homo sapiens GN=SKIV2L2 PE=1 SV=3	1.08333	0.76	0.508213	0.314311			3.3	0.78	0.006047	4	4	4	9	9	9	5	5	5	2	2	2	2	2	2	4	4	4	11	9	9	6	6	6	8	8	8	6	6	6	8	8	8	1	1	1	19.44	22.35
RBP56_HUMAN	Q92804	TATA-binding protein-associated factor 2N OS=Homo sapiens GN=TAF15 PE=1 SV=1	1.28333	-0.189999	0.485175	0.702342			5.39	0.7	0.003787	3	2	1	6	4	2	6	4	2	2	1	1	3	3	2	3	3	2	3	2	1	2	2	1	1	1	0	3	3	1	3	3	1	1	1	0	20.39	23.87
IQGA3_HUMAN	Q86VI3	Ras GTPase-activating-like protein IQGAP3 OS=Homo sapiens GN=IQGAP3 PE=1 SV=2	-0.156666	1.00143	0.939864	0.491438			2.3	0.5	0.116349	1	1	0	3	3	0	1	1	0	1	1	0	2	2	0	2	2	0	2	2	0	2	2	0	1	1	0	1	1	0	0	0	0	1	1	0	16.38	21.02
SMU1_HUMAN	Q2TAY7	WD40 repeat-containing protein SMU1 OS=Homo sapiens GN=SMU1 PE=1 SV=2	0.13	0.300001	0.918475	0.807878			4.07	0.7	0.002834	6	5	5	3	3	3	2	2	2	4	4	4	3	3	3	5	5	5	9	7	7	11	9	9	9	7	7	8	7	7	13	10	10	1	1	1	20.87	22.72
PLOD2_HUMAN	O00469	Procollagen-lysine,2-oxoglutarate 5-dioxygenase 2 OS=Homo sapiens GN=PLOD2 PE=1 SV=2	0.42	0.54	0.794379	0.540222			3.93	0.78	0.035901	5	5	5	6	6	6	7	7	7	5	5	5	5	5	5	9	9	9	4	4	4	7	7	7	9	9	9	5	5	5	5	5	5	1	1	1	19.94	23.07
GUAA_HUMAN	P49915	GMP synthase [glutamine-hydrolyzing] OS=Homo sapiens GN=GMPS PE=1 SV=1	0.953334	0.449999	0.321513	0.563893			3.48	0.67	0.019503	6	6	6	4	4	4	3	3	3	4	4	4	3	3	3	2	2	2	5	5	5	7	7	7	5	5	5	5	5	5	7	7	7	1	1	1	20.25	21.75
SMCA5_HUMAN	O60264	SWI/SNF-related matrix-associated actin-dependent regulator of chromatin subfamily A member 5 OS=Homo sapiens GN=SMARCA5 PE=1 SV=1	2.32	0.389999	0.369347	0.606645			3.54	0.72	0.028109	13	12	8	7	7	4	6	6	4	11	11	6	1	1	1	9	6	4	10	10	5	9	9	6	16	15	10	9	9	6	10	10	6	1	1	0	20.2	21.85
FLNC_HUMAN	Q14315	Filamin-C OS=Homo sapiens GN=FLNC PE=1 SV=3	0.269999	0.9	0.888344	0.0664838			3.89	0.63	0.000505	6	5	0	8	6	0	8	8	0	5	5	0	6	6	0	8	6	0	6	6	0	7	7	0	5	5	0	2	2	0	5	4	0	1	1	0	17.56	21.59
PSA_HUMAN	P55786	Puromycin-sensitive aminopeptidase OS=Homo sapiens GN=NPEPPS PE=1 SV=2	1.39667	-0.626666	0.421223	0.701234			3.13	0.69	0.006307	7	7	5	8	8	5	5	5	4	3	3	1	4	4	4	5	5	4	2	2	1	15	15	11	7	7	5	12	12	6	10	10	7	1	1	1	19.52	22.73
KI67_HUMAN	P46013	Antigen KI-67 OS=Homo sapiens GN=MKI67 PE=1 SV=2	0.356666	0.0566673	0.888052	0.948642			6.37	0.75	0.006455	21	20	20	88	76	76	63	58	58	34	33	33	29	26	26	91	72	72	8	8	8	9	9	9	15	14	14	8	8	8	6	6	6	3	3	3	18.14	24.09
SMCA1_HUMAN	P28370	Probable global transcription activator SNF2L1 OS=Homo sapiens GN=SMARCA1 PE=1 SV=2	1.08497	0.18	0.50567	0.764944			2.99	0.68	0.028109	5	5	1	3	3	0	2	2	0	5	5	0	0	0	0	6	4	2	6	6	1	4	4	1	9	9	4	5	5	2	6	6	2	1	1	0	19.32	21.27
ANXA6_HUMAN	P08133	Annexin A6 OS=Homo sapiens GN=ANXA6 PE=1 SV=3	1.11333	-0.0960732	0.461131	0.968829			3.5	0.73	0.00035	4	4	4	2	2	2	4	4	4	2	2	2	2	2	2	3	3	3	0	0	0	10	10	10	3	3	3	3	3	3	0	0	0	1	1	1	17.76	19.72
NUMA1_HUMAN	Q14980	Nuclear mitotic apparatus protein 1 OS=Homo sapiens GN=NUMA1 PE=1 SV=2	0.223334	0.436666	0.894491	0.494279			5.15	0.74	0.000484	22	20	20	44	40	40	39	33	33	25	23	23	22	19	19	37	32	32	12	11	11	19	19	19	18	17	17	19	18	18	17	16	16	2	2	2	19.44	23.36
RPN1_HUMAN	P04843	Dolichyl-diphosphooligosaccharide--protein glycosyltransferase subunit 1 OS=Homo sapiens GN=RPN1 PE=1 SV=1	-0.193333	1.51667	0.949012	0.11861			6.17	0.78	0.000265	3	3	3	28	20	20	26	17	17	12	11	11	13	10	10	35	23	23	8	8	8	5	5	5	5	5	5	4	3	3	4	4	4	1	1	1	19.18	27.19
CLU_HUMAN	O75153	Clustered mitochondria protein homolog OS=Homo sapiens GN=CLUH PE=1 SV=2	0.0833333	0.173333	0.969482	0.731495			3.55	0.66	0.003129	4	4	4	8	8	8	3	3	3	5	5	5	3	3	3	10	10	10	6	6	6	7	7	7	6	6	6	5	5	5	6	6	6	1	1	1	16.43	21.32
PRKDC_HUMAN	P78527	DNA-dependent protein kinase catalytic subunit OS=Homo sapiens GN=PRKDC PE=1 SV=3	0.323333	1.75667	0.810463	0.245212			4.53	0.77	0.000512	48	46	46	75	70	70	75	69	69	41	40	40	46	46	46	78	72	72	48	47	47	56	55	55	55	54	54	26	26	26	45	45	45	3	3	3	21.74	23.72
PALLD_HUMAN	Q8WX93	Palladin OS=Homo sapiens GN=PALLD PE=1 SV=3	0.580001	1.10667	0.63671	0.151943			3.99	0.64	0.00556	5	5	5	5	5	5	2	2	2	6	6	6	3	3	3	6	5	5	13	12	12	10	10	10	10	9	9	5	4	4	6	6	6	1	1	1	19.35	20.92
VIGLN_HUMAN	Q00341	Vigilin OS=Homo sapiens GN=HDLBP PE=1 SV=2	-0.233334	0.776667	0.903527	0.473699			4.75	0.76	0.013604	12	12	12	13	13	13	10	9	9	13	12	12	14	13	13	29	27	27	14	14	14	14	14	14	14	14	14	10	10	10	10	10	10	1	1	1	18.9	23.22
PDIA4_HUMAN	P13667	Protein disulfide-isomerase A4 OS=Homo sapiens GN=PDIA4 PE=1 SV=2	0.37	0.573332	0.792919	0.707402			5.23	0.73	0.05956	10	9	9	9	9	9	5	5	5	4	4	4	4	4	4	8	7	7	2	2	2	15	14	14	7	7	7	9	9	9	5	5	5	1	1	1	20.74	23.02
GCN1L_HUMAN	Q92616	Translational activator GCN1 OS=Homo sapiens GN=GCN1L1 PE=1 SV=6	0.43	-0.586667	0.848387	0.745137			4.33	0.72	0.001124	10	10	10	37	35	35	33	32	32	12	12	12	15	15	15	37	35	35	8	8	8	24	24	24	2	2	2	10	10	10	9	9	9	2	2	2	16.96	22.37
CKAP5_HUMAN	Q14008	Cytoskeleton-associated protein 5 OS=Homo sapiens GN=CKAP5 PE=1 SV=3	0.376667	0.263334	0.8086	0.786065			4.76	0.73	0.00577	29	26	26	40	38	38	40	36	36	24	22	22	24	24	24	40	36	35	14	14	14	14	14	14	25	23	23	18	17	16	19	19	19	1	1	1	19.84	23.41
CAN2_HUMAN	P17655	Calpain-2 catalytic subunit OS=Homo sapiens GN=CAPN2 PE=1 SV=6	0.412061	-0.740313	0.872064	0.567021			3.69	0.73	0.019068	1	1	1	1	1	0	0	0	0	0	0	0	1	1	1	2	2	1	1	1	0	4	4	3	1	1	1	3	3	2	3	3	2	0	0	0	17.25	20.39
TIMP1_HUMAN	P01033	Metalloproteinase inhibitor 1 OS=Homo sapiens GN=TIMP1 PE=1 SV=1	1.64339	0.207881	0.38268	0.838699			2.8	0.63	0.14074	1	1	1	0	0	0	1	1	1	0	0	0	1	1	1	0	0	0	2	2	2	1	1	1	2	2	2	2	2	2	1	1	1	0	0	0	18.52	15.6946
TOP2A_HUMAN	P11388	DNA topoisomerase 2-alpha OS=Homo sapiens GN=TOP2A PE=1 SV=3	-2.40273	-3.07104	0.403293	0.175426			3.61	0.73	0.004836	3	3	2	16	16	13	0	0	0	13	13	10	6	6	4	35	30	24	0	0	0	0	0	0	0	0	0	17	16	13	0	0	0	1	1	1	16.47	21.55
KPRA_HUMAN	Q14558	Phosphoribosyl pyrophosphate synthase-associated protein 1 OS=Homo sapiens GN=PRPSAP1 PE=1 SV=2	3.02222	-1.88794	0.0500927	0.371335			2.96	0.55	0.079469	1	1	0	1	1	0	2	2	1	0	0	0	0	0	0	0	0	0	0	0	0	3	3	2	1	1	1	1	1	0	1	1	0	0	0	0	16.55	19.97
DD19B_HUMAN	Q9UMR2	ATP-dependent RNA helicase DDX19B OS=Homo sapiens GN=DDX19B PE=1 SV=1	-2.15822	-2.62196	0.167067	0.0931328			2.77	0.63	0.094085	0	0	0	0	0	0	1	1	0	1	1	0	0	0	0	1	1	0	0	0	0	1	1	0	1	1	0	1	1	0	2	2	0	0	0	0	14.3126	15.3261
MP2K2_HUMAN	P36507	Dual specificity mitogen-activated protein kinase kinase 2 OS=Homo sapiens GN=MAP2K2 PE=1 SV=1	-2.3534	-0.20394	0.363303	0.910956			3.98	0.63	0.010298	2	2	1	0	0	0	2	2	0	2	2	0	2	2	1	2	2	0	1	1	1	5	5	3	4	4	2	3	3	1	7	7	4	0	0	0	19.45	13.8098
NCRP1_HUMAN	Q6ZVX7	Non-specific cytotoxic cell receptor protein 1 homolog OS=Homo sapiens GN=NCCRP1 PE=1 SV=1	0.906666	3.18365	0.492069	0.138661			2.87	0.63	0.030545	1	1	1	2	2	2	2	2	2	1	1	1	2	2	2	1	1	1	1	1	1	3	3	3	4	3	3	1	1	1	0	0	0	0	0	0	18.92	22.16
MOB1B_HUMAN	Q7L9L4	MOB kinase activator 1B OS=Homo sapiens GN=MOB1B PE=1 SV=3	1.02	-0.490284	0.593723	0.800611			2.87	0.64	0.075753	2	2	0	3	3	0	2	2	0	2	2	0	1	1	0	2	2	0	1	1	0	4	3	0	1	1	0	3	2	0	3	3	0	0	0	0	19.7	23.13
ITPR2_HUMAN	Q14571	Inositol 1,4,5-trisphosphate receptor type 2 OS=Homo sapiens GN=ITPR2 PE=1 SV=2	1.42191	0	0.486928	1			2.1	0.53	0.0265	0	0	0	8	7	4	1	1	0	0	0	0	0	0	0	2	2	1	0	0	0	0	0	0	0	0	0	0	0	0	0	0	0	0	0	0	14.5736	19.76
RENR_HUMAN	O75787	Renin receptor OS=Homo sapiens GN=ATP6AP2 PE=1 SV=2	0.423152	0	0.883906	1			4.03	0.7	0.317137	0	0	0	5	4	4	1	1	1	0	0	0	0	0	0	3	3	3	0	0	0	0	0	0	0	0	0	0	0	0	0	0	0	0	0	0	16.4441	22.91
HPBP1_HUMAN	Q9NZL4	Hsp70-binding protein 1 OS=Homo sapiens GN=HSPBP1 PE=1 SV=1	1.32922	0.615568	0.565609	0.631193			2.36	0.62	0.009426	0	0	0	1	1	1	3	3	3	2	2	2	1	1	1	0	0	0	1	1	1	1	1	1	2	2	2	2	2	2	1	1	1	0	0	0	15.2048	20.15
RHOC_HUMAN	P08134	Rho-related GTP-binding protein RhoC OS=Homo sapiens GN=RHOC PE=1 SV=1	0.815259	1.76698	0.818171	0.331344			4.08	0.72	0.240843	0	0	0	5	3	0	1	1	0	0	0	0	0	0	0	2	2	0	1	1	0	1	1	0	1	1	0	0	0	0	1	1	0	0	0	0	15.7397	24.13
PPIL4_HUMAN	Q8WUA2	Peptidyl-prolyl cis-trans isomerase-like 4 OS=Homo sapiens GN=PPIL4 PE=1 SV=1	0.481504	0.732128	0.824679	0.45886			2.74	0.51	0.622818	0	0	0	1	1	1	1	1	1	0	0	0	0	0	0	1	1	1	3	3	3	1	1	1	1	1	1	1	1	1	1	1	1	0	0	0	15.2308	21.09
SRP68_HUMAN	Q9UHB9	Signal recognition particle 68 kDa protein OS=Homo sapiens GN=SRP68 PE=1 SV=2	1.38333	-0.385272	0.605742	0.799814			3.5	0.65	0.143097	1	1	1	4	4	4	3	3	3	1	1	1	1	1	1	5	5	5	0	0	0	3	3	3	2	2	2	1	1	1	2	2	2	0	0	0	16.54	22.33
P4HA2_HUMAN	O15460	Prolyl 4-hydroxylase subunit alpha-2 OS=Homo sapiens GN=P4HA2 PE=1 SV=1	-3.08827	-2.03888	0.346359	0.360315			5.01	0.78	0.088713	0	0	0	0	0	0	2	2	2	2	2	2	0	0	0	3	3	3	0	0	0	2	2	2	3	3	3	2	2	2	3	3	3	0	0	0	13.7649	17.6956
RT05_HUMAN	P82675	28S ribosomal protein S5, mitochondrial OS=Homo sapiens GN=MRPS5 PE=1 SV=2	2.56367	0	0.30837	1			2.99	0.61	0.162235	0	0	0	11	4	4	2	2	2	0	0	0	0	0	0	2	2	2	0	0	0	0	0	0	0	0	0	0	0	0	0	0	0	0	0	0	16.7552	23.37
HSDL2_HUMAN	Q6YN16	Hydroxysteroid dehydrogenase-like protein 2 OS=Homo sapiens GN=HSDL2 PE=1 SV=1	1.35152	0.447281	0.729739	0.739649			6.13	0.75	0.020473	0	0	0	10	8	8	0	0	0	0	0	0	0	0	0	5	4	4	2	2	2	4	4	4	2	2	2	3	3	3	4	4	4	0	0	0	15.4447	24.69
GFPT1_HUMAN	Q06210	Glutamine--fructose-6-phosphate aminotransferase [isomerizing] 1 OS=Homo sapiens GN=GFPT1 PE=1 SV=3	0.622754	0.7755	0.712993	0.579737			3.15	0.76	0.020163	1	1	1	2	1	1	2	2	2	1	1	1	0	0	0	2	2	2	2	2	1	9	9	7	5	5	3	4	4	3	4	4	3	0	0	0	16.04	19.08
HSDL1_HUMAN	Q3SXM5	Inactive hydroxysteroid dehydrogenase-like protein 1 OS=Homo sapiens GN=HSDL1 PE=1 SV=3	1.3951	0.616474	0.668426	0.713319			2.5	0.58	0.00953	0	0	0	5	5	5	0	0	0	0	0	0	0	0	0	1	1	1	0	0	0	1	1	1	1	1	1	0	0	0	0	0	0	0	0	0	14.3371	23.57
GNA11_HUMAN	P29992	Guanine nucleotide-binding protein subunit alpha-11 OS=Homo sapiens GN=GNA11 PE=1 SV=2	1.09762	0	0.610077	1			2.65	0.54	0.02525	0	0	0	3	3	2	1	1	0	0	0	0	0	0	0	0	0	0	0	0	0	0	0	0	0	0	0	0	0	0	0	0	0	0	0	0	14.117	20.74
TEST_HUMAN	Q9Y6M0	Testisin OS=Homo sapiens GN=PRSS21 PE=2 SV=1	1.54213	0	0.585419	1			2.84	0.68	0.476757	0	0	0	3	3	3	2	2	2	0	0	0	1	1	1	1	1	1	0	0	0	0	0	0	0	0	0	0	0	0	0	0	0	0	0	0	16.7285	23.5
ERGI1_HUMAN	Q969X5	Endoplasmic reticulum-Golgi intermediate compartment protein 1 OS=Homo sapiens GN=ERGIC1 PE=1 SV=1	0.283333	-2.69008	0.914967	0.294722			4.27	0.7	0.003575	3	3	3	7	6	6	5	5	5	4	4	4	3	3	3	6	6	6	0	0	0	2	2	2	0	0	0	1	1	1	1	1	1	0	0	0	19.12	25.78
STAR7_HUMAN	Q9NQZ5	StAR-related lipid transfer protein 7, mitochondrial OS=Homo sapiens GN=STARD7 PE=1 SV=2	-0.204911	-1.37833	0.849153	0.21174			3.36	0.63	0.160573	2	2	2	0	0	0	2	2	2	2	2	2	3	3	3	0	0	0	1	1	1	0	0	0	0	0	0	1	1	1	1	1	1	0	0	0	17.15	15.8957
PTSS1_HUMAN	P48651	Phosphatidylserine synthase 1 OS=Homo sapiens GN=PTDSS1 PE=1 SV=1	1.13714	0	0.712895	1			2.99	0.59	0.045983	0	0	0	4	3	3	1	1	1	0	0	0	0	0	0	5	3	3	0	0	0	0	0	0	0	0	0	0	0	0	0	0	0	0	0	0	15.8846	22.17
IFM1_HUMAN	P13164	Interferon-induced transmembrane protein 1 OS=Homo sapiens GN=IFITM1 PE=1 SV=3	0.924186	1.87119	0.777767	0.373351			3.18	0.81	0.275765	0	0	0	2	2	0	1	1	0	0	0	0	0	0	0	2	2	0	0	0	0	1	1	0	0	0	0	0	0	0	0	0	0	0	0	0	16.3752	23.81
RT29_HUMAN	P51398	28S ribosomal protein S29, mitochondrial OS=Homo sapiens GN=DAP3 PE=1 SV=1	3.57554	0	0.354914	1			4.36	0.62	0.036676	0	0	0	16	8	8	4	4	4	0	0	0	0	0	0	0	0	0	0	0	0	0	0	0	0	0	0	0	0	0	0	0	0	0	0	0	14.0463	25.2
DNJB2_HUMAN	P25686	DnaJ homolog subfamily B member 2 OS=Homo sapiens GN=DNAJB2 PE=1 SV=3	0.23493	0	0.909649	1			2.14	0.56	0.270067	0	0	0	1	1	0	1	1	0	1	1	0	1	1	0	2	1	0	0	0	0	0	0	0	0	0	0	0	0	0	0	0	0	0	0	0	15.7648	20.65
LSM12_HUMAN	Q3MHD2	Protein LSM12 homolog OS=Homo sapiens GN=LSM12 PE=1 SV=2	-0.202761	0.0657673	0.926903	0.958202			3.25	0.73	0.158127	0	0	0	1	1	1	1	1	1	1	1	1	2	2	2	1	1	1	2	2	2	2	2	2	2	2	2	1	1	1	2	2	2	0	0	0	15.6417	22.09
HEXA_HUMAN	P06865	Beta-hexosaminidase subunit alpha OS=Homo sapiens GN=HEXA PE=1 SV=2	1.04596	0.205975	0.268067	0.869079			1.77	0.42	0.070463	1	1	1	0	0	0	1	1	1	0	0	0	0	0	0	0	0	0	1	1	1	4	3	3	1	1	1	1	1	1	1	1	1	0	0	0	17.94	15.5199
UBE2H_HUMAN	P62256	Ubiquitin-conjugating enzyme E2 H OS=Homo sapiens GN=UBE2H PE=1 SV=1	1.73512	-0.551242	0.278402	0.832922			1.95	0.42	0.140286	1	1	1	0	0	0	1	1	1	0	0	0	0	0	0	0	0	0	0	0	0	2	2	2	0	0	0	2	2	2	0	0	0	0	0	0	18.43	14.7509
PIN4_HUMAN	Q9Y237	Peptidyl-prolyl cis-trans isomerase NIMA-interacting 4 OS=Homo sapiens GN=PIN4 PE=1 SV=1	0.770416	0	0.788276	1			3.13	0.65	0.062332	0	0	0	1	1	1	2	2	2	0	0	0	0	0	0	1	1	1	0	0	0	0	0	0	0	0	0	0	0	0	0	0	0	0	0	0	14.4077	21.17
RPB1_HUMAN	P24928	DNA-directed RNA polymerase II subunit RPB1 OS=Homo sapiens GN=POLR2A PE=1 SV=2	0.740133	-0.518718	0.618453	0.581254			2.47	0.5	0.045922	0	0	0	2	2	2	1	1	1	0	0	0	1	1	1	2	2	2	0	0	0	1	1	1	0	0	0	0	0	0	0	0	0	0	0	0	17.1741	16.87
1B37_HUMAN	P18463	HLA class I histocompatibility antigen, B-37 alpha chain OS=Homo sapiens GN=HLA-B PE=2 SV=1	0.358083	1.4731	0.917507	0.22124			3.57	0.69	0.031364	0	0	0	4	4	0	1	1	0	0	0	0	0	0	0	3	3	0	0	0	0	1	1	0	1	1	0	0	0	0	0	0	0	0	0	0	15.8881	23.71
LRP1_HUMAN	Q07954	Prolow-density lipoprotein receptor-related protein 1 OS=Homo sapiens GN=LRP1 PE=1 SV=2	0	-0.907093	1	0.208375			1.21	0.3	0.634534	0	0	0	0	0	0	0	0	0	0	0	0	0	0	0	0	0	0	0	0	0	0	0	0	0	0	0	2	1	1	0	0	0	1	1	1	15.3314	16.2941
ARC1A_HUMAN	Q92747	Actin-related protein 2/3 complex subunit 1A OS=Homo sapiens GN=ARPC1A PE=1 SV=2	0.100938	3.39554	0.955265	0.0592406			2.3	0.47	0.291237	0	0	0	2	2	2	0	0	0	0	0	0	0	0	0	1	1	1	1	1	1	1	1	1	1	1	1	0	0	0	0	0	0	0	0	0	16.6411	20.33
CE170_HUMAN	Q5SW79	Centrosomal protein of 170 kDa OS=Homo sapiens GN=CEP170 PE=1 SV=1	0.0566667	0.466328	0.957784	0.631807			2.93	0.71	0.012552	2	2	1	3	3	2	4	4	4	2	2	1	5	4	3	2	2	1	3	3	3	3	3	2	9	9	7	1	1	1	6	6	4	0	0	0	14.73	17.93
SLTM_HUMAN	Q9NWH9	SAFB-like transcription modulator OS=Homo sapiens GN=SLTM PE=1 SV=2	-1.41676	0	0.692766	1			3.38	0.65	0.002002	1	1	1	7	6	6	0	0	0	3	3	3	1	1	1	8	7	7	0	0	0	0	0	0	0	0	0	0	0	0	0	0	0	0	0	0	14.06	22.5
CRERF_HUMAN	Q8IUR6	CREB3 regulatory factor OS=Homo sapiens GN=CREBRF PE=1 SV=2	-0.515403	-1.28981	0.865583	0.325265		Q8IUR6	1.52	0.3	0.018586	2	1	1	0	0	0	2	1	1	1	1	1	2	1	1	0	0	0	0	0	0	0	0	0	0	0	0	1	1	1	0	0	0	0	0	0	19.77	14.7783
ICLN_HUMAN	P54105	Methylosome subunit pICln OS=Homo sapiens GN=CLNS1A PE=1 SV=1	-1.25134	-0.858571	0.744356	0.605022			3.42	0.67	0.154279	0	0	0	2	2	2	0	0	0	0	0	0	0	0	0	3	3	3	0	0	0	1	1	1	1	1	1	1	1	1	1	1	1	0	0	0	13.4208	22.5
MYL1_HUMAN	P05976	Myosin light chain 1/3, skeletal muscle isoform OS=Homo sapiens GN=MYL1 PE=1 SV=3	-2.08992	-2.80755	0.270462	0.216507			3.01	0.53	0.181949	1	1	0	1	1	0	0	0	0	1	1	0	1	1	0	2	2	0	0	0	0	1	1	0	0	0	0	1	1	0	1	1	0	0	0	0	19.17	20.61
GSH0_HUMAN	P48507	Glutamate--cysteine ligase regulatory subunit OS=Homo sapiens GN=GCLM PE=1 SV=1	0.183333	0.739168	0.856897	0.707378			3.21	0.67	0.013584	1	1	1	2	2	2	4	3	3	2	2	2	4	3	3	3	3	3	3	2	2	3	2	2	6	4	4	4	3	3	4	3	3	0	0	0	19.25	21.67
MINT_HUMAN	Q96T58	Msx2-interacting protein OS=Homo sapiens GN=SPEN PE=1 SV=1	-1.14804	0	0.44802	1			2.69	0.61	0.043949	0	0	0	5	5	5	1	1	1	0	0	0	0	0	0	5	5	5	0	0	0	0	0	0	0	0	0	0	0	0	0	0	0	0	0	0	14.6901	16.56
NAA10_HUMAN	P41227	N-alpha-acetyltransferase 10 OS=Homo sapiens GN=NAA10 PE=1 SV=1	-0.426668	-0.116023	0.839362	0.927142			4.63	0.67	0.019027	2	2	2	4	4	4	3	3	2	4	3	2	3	3	2	7	6	4	1	1	1	2	2	1	3	3	3	2	2	1	4	4	2	0	0	0	18.05	22.5
INT3_HUMAN	Q68E01	Integrator complex subunit 3 OS=Homo sapiens GN=INTS3 PE=1 SV=1	2.10667	2.59298	0.229959	0.182988			4.48	0.77	0.178568	2	2	2	1	1	1	3	3	3	1	1	1	1	1	1	2	2	2	4	4	4	3	3	3	5	5	5	1	1	1	0	0	0	0	0	0	16.73	19
SCMC1_HUMAN	Q6NUK1	Calcium-binding mitochondrial carrier protein SCaMC-1 OS=Homo sapiens GN=SLC25A24 PE=1 SV=2	1.73251	0	0.688706	1			3.87	0.66	0.006914	0	0	0	19	16	16	1	1	1	0	0	0	0	0	0	5	5	5	0	0	0	0	0	0	0	0	0	0	0	0	0	0	0	0	0	0	15.8924	26.55
LSG1_HUMAN	Q9H089	Large subunit GTPase 1 homolog OS=Homo sapiens GN=LSG1 PE=1 SV=2	0.894641	0	0.695013	1			2.08	0.5	0.125373	0	0	0	2	2	2	1	1	1	0	0	0	0	0	0	4	4	4	0	0	0	0	0	0	0	0	0	0	0	0	0	0	0	0	0	0	17.1885	21.32
AP2A2_HUMAN	O94973	AP-2 complex subunit alpha-2 OS=Homo sapiens GN=AP2A2 PE=1 SV=2	-0.0333331	1.66631	0.989543	0.111616			2.73	0.66	0.146217	1	1	0	3	3	1	2	2	0	2	2	1	3	3	1	4	4	2	1	1	0	2	2	0	3	3	0	0	0	0	0	0	0	0	0	0	15.36	21.77
YLAT1_HUMAN	Q9UM01	Y+L amino acid transporter 1 OS=Homo sapiens GN=SLC7A7 PE=1 SV=2	2.73217	0.830615	0.407243	0.75602			1.5	0.21	0.023769	1	1	0	2	1	0	1	1	0	0	0	0	0	0	0	2	1	0	0	0	0	2	1	0	2	1	0	1	1	0	0	0	0	0	0	0	17.88	25.18
GT251_HUMAN	Q8NBJ5	Procollagen galactosyltransferase 1 OS=Homo sapiens GN=GLT25D1 PE=1 SV=1	0.113333	1.4711	0.90632	0.387084			2.68	0.6	0.009766	6	6	6	3	3	3	5	5	5	6	6	6	7	7	7	5	5	5	5	5	5	7	7	7	7	7	7	6	5	5	6	6	6	0	0	0	19.69	21.94
PACN3_HUMAN	Q9UKS6	Protein kinase C and casein kinase substrate in neurons protein 3 OS=Homo sapiens GN=PACSIN3 PE=1 SV=2	0.889847	-0.146865	0.707854	0.927993			4.06	0.64	0.239173	0	0	0	1	1	1	0	0	0	0	0	0	0	0	0	0	0	0	1	1	1	4	4	4	3	3	3	4	4	4	2	2	2	0	0	0	14.6517	21.05
UGGG1_HUMAN	Q9NYU2	UDP-glucose:glycoprotein glucosyltransferase 1 OS=Homo sapiens GN=UGGT1 PE=1 SV=3	-0.539962	-0.479431	0.800486	0.642843			3.18	0.63	0.011022	1	1	1	4	4	4	1	1	1	0	0	0	2	2	1	5	5	5	1	1	1	5	5	4	2	2	1	2	2	1	4	4	3	0	0	0	13.95	19.03
SRPK1_HUMAN	Q96SB4	SRSF protein kinase 1 OS=Homo sapiens GN=SRPK1 PE=1 SV=2	-0.153333	0.431186	0.901664	0.771836	Q96SB4		3.66	0.7	0.013352	3	3	1	3	3	2	3	3	2	4	4	3	4	4	3	4	4	3	2	2	1	3	2	1	6	6	4	5	4	2	5	4	2	0	0	0	19.11	21.67
PIHD1_HUMAN	Q9NWS0	PIH1 domain-containing protein 1 OS=Homo sapiens GN=PIH1D1 PE=1 SV=1	-0.427815	1.7628	0.73664	0.254646			3.34	0.66	0.303557	2	2	2	1	1	1	0	0	0	1	1	1	0	0	0	1	1	1	1	1	1	0	0	0	2	2	2	0	0	0	0	0	0	0	0	0	17.63	19.16
AT1A1_HUMAN	P05023	Sodium/potassium-transporting ATPase subunit alpha-1 OS=Homo sapiens GN=ATP1A1 PE=1 SV=1	1.35238	0.0128066	0.696887	0.994179			4.22	0.71	0.006683	1	1	0	15	12	5	3	2	2	0	0	0	0	0	0	7	5	3	0	0	0	4	4	1	1	1	0	2	2	0	0	0	0	0	0	0	15.69	24.25
KAP2_HUMAN	P13861	cAMP-dependent protein kinase type II-alpha regulatory subunit OS=Homo sapiens GN=PRKAR2A PE=1 SV=2	0.954807	1.98611	0.741774	0.196335			5.34	0.72	0.112535	0	0	0	8	8	6	1	1	1	0	0	0	1	1	1	3	3	3	3	3	3	3	3	3	3	3	2	1	1	0	3	3	2	0	0	0	17.0111	23.91
TMED4_HUMAN	Q7Z7H5	Transmembrane emp24 domain-containing protein 4 OS=Homo sapiens GN=TMED4 PE=1 SV=1	1.00611	0	0.790831	1			2.57	0.35	0.133896	0	0	0	2	1	1	3	2	1	0	0	0	1	1	1	2	1	1	0	0	0	0	0	0	0	0	0	0	0	0	0	0	0	0	0	0	14.3393	23.1
PELO_HUMAN	Q9BRX2	Protein pelota homolog OS=Homo sapiens GN=PELO PE=1 SV=2	0.464222	-0.561555	0.813626	0.661663			2.62	0.63	0.051505	0	0	0	2	2	2	2	2	2	0	0	0	1	1	1	2	2	2	1	1	1	0	0	0	2	2	2	1	1	1	1	1	1	0	0	0	15.2474	19.84
RBM8A_HUMAN	Q9Y5S9	RNA-binding protein 8A OS=Homo sapiens GN=RBM8A PE=1 SV=1	1.39	-1.22834	0.42926	0.638527			4.24	0.74	0.06911	2	2	2	2	2	2	3	3	3	1	1	1	2	2	2	1	1	1	1	1	1	2	2	2	0	0	0	3	3	3	2	2	2	0	0	0	20.48	24.37
CC137_HUMAN	Q6PK04	Coiled-coil domain-containing protein 137 OS=Homo sapiens GN=CCDC137 PE=1 SV=1	-0.200997	0	0.9228	1			2.43	0.49	0.029976	2	2	2	1	1	1	0	0	0	1	1	1	0	0	0	2	2	2	0	0	0	0	0	0	0	0	0	0	0	0	0	0	0	0	0	0	17.23	19.05
RCL1_HUMAN	Q9Y2P8	RNA 3'-terminal phosphate cyclase-like protein OS=Homo sapiens GN=RCL1 PE=1 SV=3	1.49985	-0.0581824	0.399704	0.962699			3.2	0.64	0.024902	0	0	0	2	2	2	3	3	3	2	2	2	2	2	2	0	0	0	0	0	0	0	0	0	2	2	2	0	0	0	0	0	0	0	0	0	15.6715	20.76
1B27_HUMAN	P03989	HLA class I histocompatibility antigen, B-27 alpha chain OS=Homo sapiens GN=HLA-B PE=1 SV=2	0.513158	0.8397	0.893429	0.536901			3.57	0.69	0.033035	0	0	0	3	3	0	1	1	0	0	0	0	0	0	0	2	2	0	0	0	0	1	1	0	1	1	0	0	0	0	0	0	0	0	0	0	14.7133	23.57
ECHA_HUMAN	P40939	Trifunctional enzyme subunit alpha, mitochondrial OS=Homo sapiens GN=HADHA PE=1 SV=2	3.53788	5.15968	0.492911	0.107749			5.51	0.77	0.035219	0	0	0	45	30	30	9	9	9	0	0	0	0	0	0	20	16	16	1	1	1	10	10	10	15	14	14	0	0	0	0	0	0	0	0	0	16.4031	27.71
SPCS3_HUMAN	P61009	Signal peptidase complex subunit 3 OS=Homo sapiens GN=SPCS3 PE=1 SV=1	-1.46	0.0252794	0.496924	0.985396			2.95	0.68	0.126265	1	1	1	1	1	1	2	2	2	2	2	2	2	2	2	3	3	3	1	1	1	1	1	1	1	1	1	1	1	1	1	1	1	0	0	0	18.58	22.15
NHRF4_HUMAN	Q86UT5	Na(+)/H(+) exchange regulatory cofactor NHE-RF4 OS=Homo sapiens GN=PDZD3 PE=1 SV=2	0.189294	-3.3287	0.932848	0.0597884			1.31	0.35	0.022101	1	1	0	1	1	0	1	1	0	0	0	0	1	1	0	2	1	0	0	0	0	0	0	0	0	0	0	1	1	0	1	1	0	0	0	0	17.36	21.99
CSTF3_HUMAN	Q12996	Cleavage stimulation factor subunit 3 OS=Homo sapiens GN=CSTF3 PE=1 SV=1	-0.0769978	-0.214502	0.967156	0.84728			2.79	0.62	0.230169	0	0	0	0	0	0	0	0	0	0	0	0	1	1	1	0	0	0	2	2	2	2	2	2	1	1	1	1	1	1	2	2	2	0	0	0	16.7897	16.1305
SRS12_HUMAN	Q8WXF0	Serine/arginine-rich splicing factor 12 OS=Homo sapiens GN=SRSF12 PE=1 SV=1	1.63808	-1.02581	0.475525	0.515776			3.07	0.75	0.009484	0	0	0	2	1	0	2	1	0	0	0	0	1	1	0	1	1	0	0	0	0	0	0	0	0	0	0	0	0	0	1	1	0	0	0	0	17.2038	21.96
DNJB1_HUMAN	P25685	DnaJ homolog subfamily B member 1 OS=Homo sapiens GN=DNAJB1 PE=1 SV=4	0.35	0.210762	0.852322	0.893293			2.94	0.66	0.009483	2	1	1	6	4	4	7	6	6	6	5	5	5	4	4	4	4	4	0	0	0	2	2	2	3	3	3	2	2	2	3	3	3	0	0	0	18.57	23.3
TOP3A_HUMAN	Q13472	DNA topoisomerase 3-alpha OS=Homo sapiens GN=TOP3A PE=1 SV=1	-0.790294	0	0.467984	1			4.81	0.75	0.142837	2	2	2	0	0	0	1	1	1	1	1	1	0	0	0	1	1	1	0	0	0	0	0	0	0	0	0	0	0	0	0	0	0	0	0	0	16.27	16.2618
ACPM_HUMAN	O14561	Acyl carrier protein, mitochondrial OS=Homo sapiens GN=NDUFAB1 PE=1 SV=3	0.794504	0.749693	0.869489	0.689049			2.53	0.56	0.015821	0	0	0	6	4	4	1	1	1	1	1	1	1	1	1	5	3	3	0	0	0	1	1	1	0	0	0	0	0	0	0	0	0	0	0	0	15.0235	28.1
NOL10_HUMAN	Q9BSC4	Nucleolar protein 10 OS=Homo sapiens GN=NOL10 PE=1 SV=1	0.851519	-0.676606	0.617631	0.662242			3.56	0.68	0.011748	1	1	1	2	2	2	2	2	2	0	0	0	0	0	0	1	1	1	2	2	2	0	0	0	3	3	3	1	1	1	2	2	2	0	0	0	17.06	19.94
RSU1_HUMAN	Q15404	Ras suppressor protein 1 OS=Homo sapiens GN=RSU1 PE=1 SV=3	0.966745	-0.722741	0.656083	0.676694			2.16	0.45	0.076411	2	2	2	1	1	1	1	1	1	1	1	1	0	0	0	2	2	2	0	0	0	0	0	0	1	1	1	1	1	1	0	0	0	0	0	0	18.6	21.5
SPT5H_HUMAN	O00267	Transcription elongation factor SPT5 OS=Homo sapiens GN=SUPT5H PE=1 SV=1	0.212922	-0.331227	0.916449	0.558757			2.69	0.67	0.253138	0	0	0	1	1	1	1	1	1	1	1	1	1	1	1	4	3	3	0	0	0	1	1	1	0	0	0	0	0	0	0	0	0	0	0	0	16.2488	17.43
CHM4B_HUMAN	Q9H444	Charged multivesicular body protein 4b OS=Homo sapiens GN=CHMP4B PE=1 SV=1	-0.340925	-2.66876	0.804988	0.098567			2.83	0.64	0.270094	1	1	1	1	1	1	0	0	0	0	0	0	0	0	0	2	1	1	0	0	0	0	0	0	0	0	0	1	1	1	1	1	1	0	0	0	16.12	17.28
RPR1B_HUMAN	Q9NQG5	Regulation of nuclear pre-mRNA domain-containing protein 1B OS=Homo sapiens GN=RPRD1B PE=1 SV=1	-0.29	-0.701522	0.856522	0.776386			3.41	0.67	0.051741	2	2	2	3	3	3	4	3	3	3	3	3	3	3	3	5	5	4	0	0	0	4	4	4	3	3	3	1	1	1	1	1	1	0	0	0	17.66	21.14
RM28_HUMAN	Q13084	39S ribosomal protein L28, mitochondrial OS=Homo sapiens GN=MRPL28 PE=1 SV=4	2.15823	0	0.624084	1			3.45	0.64	0.059966	0	0	0	17	9	9	5	5	5	0	0	0	0	0	0	10	7	7	0	0	0	0	0	0	0	0	0	0	0	0	0	0	0	0	0	0	14.8566	25.59
F262_HUMAN	O60825	6-phosphofructo-2-kinase/fructose-2,6-bisphosphatase 2 OS=Homo sapiens GN=PFKFB2 PE=1 SV=2	-0.279363	1.59531	0.811712	0.329504			2.84	0.49	0.036043	1	1	1	1	1	1	1	1	1	0	0	0	0	0	0	2	2	1	0	0	0	2	2	1	2	2	1	0	0	0	1	1	0	0	0	0	16.51	19.34
1B45_HUMAN	P30483	HLA class I histocompatibility antigen, B-45 alpha chain OS=Homo sapiens GN=HLA-B PE=2 SV=1	0.319415	0.650219	0.926575	0.741844			3.57	0.69	0.033035	0	0	0	3	3	0	1	1	0	0	0	0	0	0	0	2	2	0	0	0	0	1	1	0	1	1	0	0	0	0	0	0	0	0	0	0	15.2653	23.42
RT23_HUMAN	Q9Y3D9	28S ribosomal protein S23, mitochondrial OS=Homo sapiens GN=MRPS23 PE=1 SV=2	1.07639	0	0.804683	1			3.45	0.7	0.00381	0	0	0	13	9	9	1	1	1	0	0	0	0	0	0	3	3	3	0	0	0	0	0	0	0	0	0	0	0	0	0	0	0	0	0	0	14.5796	26.4
LMNB1_HUMAN	P20700	Lamin-B1 OS=Homo sapiens GN=LMNB1 PE=1 SV=2	0.363333	2.29175	0.908937	0.210846			4.38	0.7	0.001067	3	3	3	25	21	20	10	9	9	7	6	6	5	4	4	29	25	24	14	14	12	10	9	8	10	9	8	9	7	6	8	7	7	0	0	0	18.65	26.46
SMAP_HUMAN	O00193	Small acidic protein OS=Homo sapiens GN=SMAP PE=1 SV=1	-1.86548	-1.41657	0.36369	0.573774			3.19	0.72	0.042872	0	0	0	0	0	0	1	1	1	1	1	1	0	0	0	3	2	2	0	0	0	2	1	1	0	0	0	2	1	1	0	0	0	0	0	0	15.246	16.0552
SCOT1_HUMAN	P55809	Succinyl-CoA:3-ketoacid coenzyme A transferase 1, mitochondrial OS=Homo sapiens GN=OXCT1 PE=1 SV=1	2.57193	1.23512	0.519802	0.637342			5.76	0.77	0.009779	0	0	0	18	12	11	0	0	0	0	0	0	0	0	0	3	3	3	0	0	0	6	6	5	4	4	4	2	2	2	0	0	0	0	0	0	16.826	25.95
RGPD2_HUMAN	P0DJD1	RANBP2-like and GRIP domain-containing protein 2 OS=Homo sapiens GN=RGPD2 PE=2 SV=1	0.926667	-1.6344	0.495703	0.0702727			2.39	0.59	0.004676	2	2	0	4	4	0	3	3	0	2	2	0	2	2	0	2	2	0	0	0	0	0	0	0	0	0	0	1	1	0	0	0	0	0	0	0	15.18	18.93
ICT1_HUMAN	Q14197	Peptidyl-tRNA hydrolase ICT1, mitochondrial OS=Homo sapiens GN=ICT1 PE=1 SV=1	1.42052	0	0.723054	1			3.82	0.74	0.032482	0	0	0	9	6	6	2	2	2	0	0	0	0	0	0	2	2	2	0	0	0	0	0	0	0	0	0	0	0	0	0	0	0	0	0	0	14.1029	25.29
HYOU1_HUMAN	Q9Y4L1	Hypoxia up-regulated protein 1 OS=Homo sapiens GN=HYOU1 PE=1 SV=1	-3.83652	1.08585	0.0680378	0.417085			3.93	0.72	0.024559	2	2	2	0	0	0	1	1	1	5	5	5	4	4	4	12	10	10	1	1	1	6	6	6	2	2	2	2	2	2	2	2	2	0	0	0	16.1	15.0104
ACSL4_HUMAN	O60488	Long-chain-fatty-acid--CoA ligase 4 OS=Homo sapiens GN=ACSL4 PE=1 SV=2	0.904919	1.02975	0.736506	0.393103			4.58	0.75	0.058115	0	0	0	5	5	3	1	1	0	1	1	0	1	1	0	4	4	2	1	1	1	3	3	3	2	2	2	1	1	1	1	1	1	0	0	0	17.9548	23.37
SYCC_HUMAN	P49589	Cysteine--tRNA ligase, cytoplasmic OS=Homo sapiens GN=CARS PE=1 SV=3	0.00333277	1.24612	0.996933	0.517552			3.37	0.73	0.005384	10	8	8	2	2	2	5	5	5	7	7	7	3	3	3	5	5	5	9	9	9	10	9	9	6	6	6	7	6	6	10	9	9	0	0	0	19.98	21.38
ASCC1_HUMAN	Q8N9N2	Activating signal cointegrator 1 complex subunit 1 OS=Homo sapiens GN=ASCC1 PE=1 SV=1	0	-1.3183	1	0.505229			2.03	0.6	0.190324	0	0	0	0	0	0	0	0	0	0	0	0	0	0	0	0	0	0	1	1	1	1	1	1	0	0	0	1	1	1	2	2	2	0	0	0	16.9831	15.3146
KAD2_HUMAN	P54819	Adenylate kinase 2, mitochondrial OS=Homo sapiens GN=AK2 PE=1 SV=2	1.54667	0.019158	0.475663	0.991774			3.62	0.67	0.061782	3	2	2	7	5	5	4	3	3	2	2	2	3	2	2	3	2	2	2	1	1	6	4	4	3	2	2	3	2	2	4	3	3	0	0	0	19.79	25.02
DHX30_HUMAN	Q7L2E3	Putative ATP-dependent RNA helicase DHX30 OS=Homo sapiens GN=DHX30 PE=1 SV=1	2.3968	-0.181599	0.438524	0.847544			4.25	0.72	0.018874	0	0	0	27	24	24	5	5	5	6	6	6	2	2	2	11	9	9	2	2	2	0	0	0	1	1	1	2	2	2	0	0	0	0	0	0	17.1704	24.87
BIG1_HUMAN	Q9Y6D6	Brefeldin A-inhibited guanine nucleotide-exchange protein 1 OS=Homo sapiens GN=ARFGEF1 PE=1 SV=2	0.0940682	0	0.946698	1			1.82	0.52	0.247132	0	0	0	2	2	0	1	1	0	0	0	0	0	0	0	1	1	0	0	0	0	0	0	0	0	0	0	0	0	0	0	0	0	0	0	0	15.8562	17.41
DNMT1_HUMAN	P26358	DNA (cytosine-5)-methyltransferase 1 OS=Homo sapiens GN=DNMT1 PE=1 SV=2	0.313333	-0.599344	0.895819	0.625044			3.45	0.67	0.006878	4	4	4	10	9	9	3	3	3	5	5	5	1	1	1	11	11	11	3	3	3	4	4	4	5	5	5	9	9	9	5	5	5	0	0	0	16.47	20.9
1B39_HUMAN	P30475	HLA class I histocompatibility antigen, B-39 alpha chain OS=Homo sapiens GN=HLA-B PE=2 SV=1	0.282737	0.50695	0.934566	0.590321			3.57	0.69	0.031364	0	0	0	4	4	0	1	1	0	0	0	0	0	0	0	3	3	0	0	0	0	1	1	0	1	1	0	0	0	0	0	0	0	0	0	0	15.7702	23.64
1B15_HUMAN	P30464	HLA class I histocompatibility antigen, B-15 alpha chain OS=Homo sapiens GN=HLA-B PE=1 SV=2	0.989078	1.94495	0.759693	0.227384			3.57	0.69	0.033035	0	0	0	4	4	0	2	2	0	0	0	0	0	0	0	3	3	0	0	0	0	1	1	0	1	1	0	0	0	0	0	0	0	0	0	0	16.8113	23.77
AGK_HUMAN	Q53H12	Acylglycerol kinase, mitochondrial OS=Homo sapiens GN=AGK PE=1 SV=2	1.3042	0	0.75579	1			4.18	0.77	0.009985	0	0	0	9	8	8	1	1	1	0	0	0	0	0	0	3	3	3	0	0	0	0	0	0	0	0	0	0	0	0	0	0	0	0	0	0	16.2438	25.7
DHCR7_HUMAN	Q9UBM7	7-dehydrocholesterol reductase OS=Homo sapiens GN=DHCR7 PE=1 SV=1	0.00737826	0	0.997872	1			2.95	0.62	0.014227	0	0	0	4	3	3	1	1	1	1	1	1	1	1	1	4	3	3	0	0	0	0	0	0	0	0	0	0	0	0	0	0	0	0	0	0	16.7321	24.25
RHG01_HUMAN	Q07960	Rho GTPase-activating protein 1 OS=Homo sapiens GN=ARHGAP1 PE=1 SV=1	0.587808	-0.565388	0.689984	0.623608			3.7	0.7	0.018439	1	1	1	1	1	1	0	0	0	0	0	0	0	0	0	0	0	0	1	1	1	1	1	1	2	2	2	2	2	2	2	2	2	0	0	0	16.27	19.21
TPPC3_HUMAN	O43617	Trafficking protein particle complex subunit 3 OS=Homo sapiens GN=TRAPPC3 PE=1 SV=1	0.453334	-1.83629	0.781389	0.443609			1.98	0.56	0.022139	2	2	2	2	2	2	2	2	2	2	2	2	2	2	2	3	3	3	0	0	0	1	1	1	2	2	2	2	2	2	2	2	2	0	0	0	19.04	22.45
ATD3B_HUMAN	Q5T9A4	ATPase family AAA domain-containing protein 3B OS=Homo sapiens GN=ATAD3B PE=1 SV=1	2.40115	0	0.618997	1			4.18	0.64	0.012035	0	0	0	18	14	4	5	5	1	0	0	0	1	1	1	7	6	2	0	0	0	0	0	0	0	0	0	0	0	0	0	0	0	0	0	0	16.1822	27.19
ZMYM4_HUMAN	Q5VZL5	Zinc finger MYM-type protein 4 OS=Homo sapiens GN=ZMYM4 PE=1 SV=1	0.624913	-1.06543	0.620149	0.262219			2.31	0.5	0.310518	0	0	0	0	0	0	0	0	0	2	2	1	1	1	1	1	1	1	0	0	0	0	0	0	1	1	1	1	1	1	0	0	0	0	0	0	14.8218	16.9068
ERLN2_HUMAN	O94905	Erlin-2 OS=Homo sapiens GN=ERLIN2 PE=1 SV=1	1.36928	1.42624	0.670412	0.179354			3.25	0.66	0.050879	0	0	0	3	3	2	5	5	3	0	0	0	1	1	0	5	4	3	2	2	0	2	2	0	2	2	0	1	1	0	0	0	0	0	0	0	16.3727	22.97
GLYC_HUMAN	P34896	Serine hydroxymethyltransferase, cytosolic OS=Homo sapiens GN=SHMT1 PE=1 SV=1	0.124193	-0.880138	0.976145	0.671005			4.01	0.68	0.057475	0	0	0	3	3	1	0	0	0	0	0	0	0	0	0	4	3	1	0	0	0	1	1	0	1	1	0	1	1	1	0	0	0	0	0	0	15.1533	25.08
TPD52_HUMAN	P55327	Tumor protein D52 OS=Homo sapiens GN=TPD52 PE=1 SV=2	0.436862	0	0.865957	1			3.02	0.7	0.170117	0	0	0	1	1	1	2	2	2	0	0	0	0	0	0	3	3	3	0	0	0	0	0	0	0	0	0	0	0	0	0	0	0	0	0	0	16.8532	21.26
IPYR2_HUMAN	Q9H2U2	Inorganic pyrophosphatase 2, mitochondrial OS=Homo sapiens GN=PPA2 PE=1 SV=2	1.36661	0	0.69072	1			4.39	0.66	0.014283	0	0	0	6	5	5	1	1	1	0	0	0	0	0	0	4	4	4	0	0	0	0	0	0	0	0	0	0	0	0	0	0	0	0	0	0	16.6885	24.15
TRAM1_HUMAN	Q15629	Translocating chain-associated membrane protein 1 OS=Homo sapiens GN=TRAM1 PE=1 SV=3	0.728956	0	0.828157	1			3.17	0.55	0.018251	0	0	0	2	1	1	1	1	1	0	0	0	0	0	0	4	2	2	0	0	0	0	0	0	0	0	0	0	0	0	0	0	0	0	0	0	16.6417	23.47
RD23B_HUMAN	P54727	UV excision repair protein RAD23 homolog B OS=Homo sapiens GN=RAD23B PE=1 SV=1	0	-0.806835	1	0.647826			2.27	0.48	0.398226	0	0	0	0	0	0	0	0	0	0	0	0	0	0	0	0	0	0	2	2	2	1	1	1	0	0	0	2	2	2	1	1	1	0	0	0	16.0009	14.1545
LYPA1_HUMAN	O75608	Acyl-protein thioesterase 1 OS=Homo sapiens GN=LYPLA1 PE=1 SV=1	1.20646	0.3422	0.677314	0.820007			1.63	0.5	0.029077	2	2	2	2	2	2	0	0	0	0	0	0	1	1	1	1	1	1	1	1	1	1	1	1	1	1	1	1	1	1	1	1	1	0	0	0	18.8	22.5
K2013_HUMAN	Q8IYS2	Uncharacterized protein KIAA2013 OS=Homo sapiens GN=KIAA2013 PE=2 SV=1	0.811765	0	0.713225	1			2.45	0.53	0.201114	0	0	0	2	2	2	1	1	1	1	1	1	1	1	1	1	1	1	0	0	0	0	0	0	0	0	0	0	0	0	0	0	0	0	0	0	15.1253	20.74
MRRP1_HUMAN	Q7L0Y3	Mitochondrial ribonuclease P protein 1 OS=Homo sapiens GN=TRMT10C PE=1 SV=2	3.57228	2.65227	0.350104	0.198489			5.49	0.78	0.006549	0	0	0	27	16	16	5	5	5	0	0	0	0	0	0	3	2	2	0	0	0	2	2	2	2	2	2	0	0	0	0	0	0	0	0	0	17.5319	26.43
UCHL3_HUMAN	P15374	Ubiquitin carboxyl-terminal hydrolase isozyme L3 OS=Homo sapiens GN=UCHL3 PE=1 SV=1	-1.81976	-0.818738	0.34165	0.703211			2.03	0.54	0.064311	0	0	0	0	0	0	0	0	0	0	0	0	0	0	0	2	2	2	0	0	0	2	2	2	2	2	2	1	1	1	1	1	1	0	0	0	15.4518	14.5742
BIG2_HUMAN	Q9Y6D5	Brefeldin A-inhibited guanine nucleotide-exchange protein 2 OS=Homo sapiens GN=ARFGEF2 PE=1 SV=3	-0.466458	0	0.79495	1			1.82	0.52	0.247132	0	0	0	3	3	1	1	1	0	0	0	0	0	0	0	1	1	0	0	0	0	0	0	0	0	0	0	0	0	0	0	0	0	0	0	0	16.6141	17.79
DIC_HUMAN	Q9UBX3	Mitochondrial dicarboxylate carrier OS=Homo sapiens GN=SLC25A10 PE=1 SV=2	1.33645	0	0.758996	1			4.67	0.79	0.034782	0	0	0	18	11	11	4	3	3	1	1	1	2	2	2	10	6	6	0	0	0	0	0	0	0	0	0	0	0	0	0	0	0	0	0	0	16.5094	27.49
GEMI2_HUMAN	O14893	Gem-associated protein 2 OS=Homo sapiens GN=GEMIN2 PE=1 SV=1	-1.37667	-0.735787	0.246915	0.687768			2.32	0.67	0.107428	1	1	1	1	1	1	1	1	1	2	2	2	2	2	2	1	1	1	2	2	2	2	2	2	1	1	1	2	2	2	2	2	2	0	0	0	15.36	18.55
AP3M1_HUMAN	Q9Y2T2	AP-3 complex subunit mu-1 OS=Homo sapiens GN=AP3M1 PE=1 SV=1	0	-1.32855	1	0.438627			2.03	0.57	0.059013	0	0	0	0	0	0	0	0	0	0	0	0	0	0	0	0	0	0	0	0	0	1	1	0	2	2	0	1	1	0	2	2	0	0	0	0	16.2687	13.8259
GNPI1_HUMAN	P46926	Glucosamine-6-phosphate isomerase 1 OS=Homo sapiens GN=GNPDA1 PE=1 SV=1	0.283334	-0.0672957	0.833567	0.973646			2.35	0.7	0.048468	3	3	2	2	2	1	2	2	1	2	2	1	3	3	2	3	3	2	1	1	0	4	4	2	3	3	2	3	3	2	4	4	2	0	0	0	19.78	21.68
ADHX_HUMAN	P11766	Alcohol dehydrogenase class-3 OS=Homo sapiens GN=ADH5 PE=1 SV=4	0.496667	0.948375	0.76466	0.470262			3.86	0.67	0.067548	2	2	2	2	2	2	2	2	2	1	1	1	1	1	1	3	3	3	1	1	1	3	2	2	1	1	1	1	1	1	1	1	1	0	0	0	18.47	21.31
TOM40_HUMAN	O96008	Mitochondrial import receptor subunit TOM40 homolog OS=Homo sapiens GN=TOMM40 PE=1 SV=1	2.55637	0	0.598502	1			6.07	0.75	0.047924	0	0	0	16	10	10	7	4	4	0	0	0	1	1	1	6	4	4	0	0	0	0	0	0	0	0	0	0	0	0	0	0	0	0	0	0	15.8616	27.6
TIM50_HUMAN	Q3ZCQ8	Mitochondrial import inner membrane translocase subunit TIM50 OS=Homo sapiens GN=TIMM50 PE=1 SV=2	1.78287	0	0.579346	1			4.16	0.78	0.129598	0	0	0	6	4	4	4	4	4	0	0	0	0	0	0	3	2	2	0	0	0	0	0	0	0	0	0	0	0	0	0	0	0	0	0	0	16.5797	25.14
TMED7_HUMAN	Q9Y3B3	Transmembrane emp24 domain-containing protein 7 OS=Homo sapiens GN=TMED7 PE=1 SV=2	0.109546	0	0.974805	1			2.72	0.64	0.1283	0	0	0	3	2	2	3	2	2	2	1	1	1	1	1	3	2	2	0	0	0	0	0	0	0	0	0	0	0	0	0	0	0	0	0	0	15.8186	24.36
SSRP1_HUMAN	Q08945	FACT complex subunit SSRP1 OS=Homo sapiens GN=SSRP1 PE=1 SV=1	-0.42	-2.82091	0.812494	0.306022			3.8	0.68	0.034678	4	4	4	3	3	3	3	3	3	6	6	6	3	3	3	7	7	7	0	0	0	2	2	2	0	0	0	6	6	6	3	3	3	0	0	0	19.9	22.38
DYL2_HUMAN	Q96FJ2	Dynein light chain 2, cytoplasmic OS=Homo sapiens GN=DYNLL2 PE=1 SV=1	0.503333	0.326769	0.676032	0.901963			3.07	0.65	0.009652	1	1	0	2	1	0	2	2	1	1	1	0	3	2	1	3	2	1	1	1	0	1	1	0	2	2	1	3	3	2	3	3	2	0	0	0	22.83	25.34
PRDX3_HUMAN	P30048	Thioredoxin-dependent peroxide reductase, mitochondrial OS=Homo sapiens GN=PRDX3 PE=1 SV=3	1.20037	-0.345825	0.783923	0.918537			4.83	0.75	0.011085	0	0	0	22	12	12	7	5	5	2	1	1	4	3	3	11	7	7	0	0	0	4	4	4	6	6	6	3	2	2	2	2	2	0	0	0	17.0611	29.42
LAMB1_HUMAN	P07942	Laminin subunit beta-1 OS=Homo sapiens GN=LAMB1 PE=1 SV=2	0.78	0.469219	0.759432	0.416174			3.47	0.75	0.054945	1	1	1	7	7	7	4	4	4	2	2	2	1	1	1	6	6	6	2	2	2	3	3	3	5	5	5	1	1	1	4	4	4	0	0	0	14.58	20.62
RAVR1_HUMAN	Q8IY67	Ribonucleoprotein PTB-binding 1 OS=Homo sapiens GN=RAVER1 PE=1 SV=1	0.955179	-0.0704419	0.738436	0.962332			3.08	0.56	0.056929	0	0	0	1	1	1	2	2	2	0	0	0	0	0	0	1	1	1	0	0	0	0	0	0	0	0	0	0	0	0	1	1	1	0	0	0	14.9974	19.47
DNJB4_HUMAN	Q9UDY4	DnaJ homolog subfamily B member 4 OS=Homo sapiens GN=DNAJB4 PE=1 SV=1	0.183333	-1.31203	0.923378	0.60485			4.06	0.73	0.003032	4	3	3	8	6	6	12	7	7	7	5	5	5	4	4	12	8	8	0	0	0	2	2	2	4	4	4	2	2	2	3	3	3	0	0	0	20.15	24.89
MYPT1_HUMAN	O14974	Protein phosphatase 1 regulatory subunit 12A OS=Homo sapiens GN=PPP1R12A PE=1 SV=1	-0.0315806	-0.122585	0.989642	0.874686			3.07	0.57	0.087011	0	0	0	0	0	0	0	0	0	1	1	1	1	1	1	6	6	6	0	0	0	0	0	0	2	2	2	0	0	0	0	0	0	0	0	0	15.3266	16.9521
ORML3_HUMAN	Q8N138	ORM1-like protein 3 OS=Homo sapiens GN=ORMDL3 PE=1 SV=1	0.938576	0	0.79309	1			1.79	0.51	0.038774	0	0	0	2	2	0	1	1	0	0	0	0	0	0	0	2	2	0	0	0	0	0	0	0	0	0	0	0	0	0	0	0	0	0	0	0	15.299	23.02
SC11A_HUMAN	P67812	Signal peptidase complex catalytic subunit SEC11A OS=Homo sapiens GN=SEC11A PE=1 SV=1	0.839903	0	0.845808	1			3.09	0.68	0.158552	0	0	0	2	2	2	2	2	2	1	1	1	1	1	1	3	3	3	0	0	0	0	0	0	0	0	0	0	0	0	0	0	0	0	0	0	15.2297	24.79
1C01_HUMAN	P30499	HLA class I histocompatibility antigen, Cw-1 alpha chain OS=Homo sapiens GN=HLA-C PE=2 SV=1	0.648853	0	0.823616	1			4.99	0.71	0.031364	0	0	0	2	2	0	1	1	0	0	0	0	0	0	0	2	2	0	0	0	0	0	0	0	0	0	0	0	0	0	0	0	0	0	0	0	15.6094	21.94
BROX_HUMAN	Q5VW32	BRO1 domain-containing protein BROX OS=Homo sapiens GN=BROX PE=1 SV=1	0	-1.47549	1	0.323552			1.86	0.45	0.516978	0	0	0	0	0	0	0	0	0	0	0	0	0	0	0	0	0	0	0	0	0	2	2	2	0	0	0	1	1	1	1	1	1	0	0	0	15.5836	16.1393
MAEA_HUMAN	Q7L5Y9	Macrophage erythroblast attacher OS=Homo sapiens GN=MAEA PE=1 SV=1	0	0.152009	1	0.914665			3.15	0.67	0.241142	0	0	0	0	0	0	0	0	0	0	0	0	0	0	0	0	0	0	1	1	1	1	1	1	0	0	0	0	0	0	3	3	3	0	0	0	15.483	18.4645
KC1AL_HUMAN	Q8N752	Casein kinase I isoform alpha-like OS=Homo sapiens GN=CSNK1A1L PE=2 SV=2	0.123333	0.0628532	0.925839	0.969444			3.39	0.71	0.031743	1	1	0	3	3	0	3	3	0	1	1	0	1	1	0	2	2	0	1	1	0	0	0	0	0	0	0	0	0	0	0	0	0	0	0	0	18.88	21.64
HINT1_HUMAN	P49773	Histidine triad nucleotide-binding protein 1 OS=Homo sapiens GN=HINT1 PE=1 SV=2	-0.796666	-4.56897	0.702965	0.198958			5.6	0.7	0.282696	1	1	1	3	2	2	3	2	2	2	1	1	2	1	1	2	2	2	0	0	0	1	1	1	0	0	0	2	2	2	3	2	2	0	0	0	18.59	24.44
NIT2_HUMAN	Q9NQR4	Omega-amidase NIT2 OS=Homo sapiens GN=NIT2 PE=1 SV=1	0.167547	0	0.934768	1			3.65	0.75	0.352656	1	1	1	3	3	3	0	0	0	0	0	0	0	0	0	1	1	1	0	0	0	0	0	0	0	0	0	0	0	0	0	0	0	0	0	0	16.2	21.24
DHSB_HUMAN	P21912	Succinate dehydrogenase [ubiquinone] iron-sulfur subunit, mitochondrial OS=Homo sapiens GN=SDHB PE=1 SV=3	2.6424	0	0.565139	1			4.51	0.73	0.005995	0	0	0	23	14	14	10	8	8	0	0	0	0	0	0	11	8	8	0	0	0	0	0	0	0	0	0	0	0	0	0	0	0	0	0	0	16.5452	27.33
PSB8_HUMAN	P28062	Proteasome subunit beta type-8 OS=Homo sapiens GN=PSMB8 PE=1 SV=3	0.0333341	-0.0327415	0.980388	0.987686			3.93	0.69	0.005789	4	4	4	2	2	2	2	2	2	4	4	4	3	2	2	4	3	3	3	2	2	4	3	3	3	2	2	6	5	5	7	6	6	0	0	0	19.82	21.28
NCBP2_HUMAN	P52298	Nuclear cap-binding protein subunit 2 OS=Homo sapiens GN=NCBP2 PE=1 SV=1	-1.98329	-1.37308	0.235463	0.593524			2.6	0.61	0.053948	2	2	2	0	0	0	3	3	3	3	3	3	3	3	3	2	2	2	0	0	0	3	3	3	2	2	2	3	3	3	2	2	2	0	0	0	19.55	16.0901
PMM2_HUMAN	O15305	Phosphomannomutase 2 OS=Homo sapiens GN=PMM2 PE=1 SV=1	2.25704	-0.987799	0.19973	0.548614			2.49	0.56	0.019808	1	1	1	3	3	3	3	3	2	1	1	0	2	2	1	0	0	0	1	1	0	1	1	0	1	1	0	3	3	2	2	2	1	0	0	0	17.09	21.29
ABCE1_HUMAN	P61221	ATP-binding cassette sub-family E member 1 OS=Homo sapiens GN=ABCE1 PE=1 SV=1	-0.743334	1.12564	0.707051	0.495095			3.7	0.73	0.006242	1	1	1	5	4	4	4	4	4	5	5	5	5	4	4	7	7	7	3	3	3	2	2	2	2	2	2	4	4	4	1	1	1	0	0	0	18.3	23.18
HAP28_HUMAN	Q13442	28 kDa heat- and acid-stable phosphoprotein OS=Homo sapiens GN=PDAP1 PE=1 SV=1	-0.12	-1.8054	0.947176	0.539993			3.06	0.7	0.00875	3	3	3	4	3	3	3	3	3	5	5	5	3	2	2	5	5	5	0	0	0	5	5	5	1	1	1	4	4	4	5	5	5	0	0	0	19.48	23.69
ZMYM3_HUMAN	Q14202	Zinc finger MYM-type protein 3 OS=Homo sapiens GN=ZMYM3 PE=1 SV=2	0.743747	-0.235051	0.416518	0.807016			1.99	0.51	0.483641	0	0	0	2	2	2	0	0	0	1	1	0	0	0	0	1	1	1	0	0	0	0	0	0	0	0	0	0	0	0	1	1	1	0	0	0	15.3609	17.54
RM16_HUMAN	Q9NX20	39S ribosomal protein L16, mitochondrial OS=Homo sapiens GN=MRPL16 PE=1 SV=1	3.35622	0	0.48021	1			3.01	0.71	0.004318	0	0	0	9	6	6	5	5	5	0	0	0	0	0	0	6	5	5	0	0	0	0	0	0	0	0	0	0	0	0	0	0	0	0	0	0	16.5476	26.59
NPTN_HUMAN	Q9Y639	Neuroplastin OS=Homo sapiens GN=NPTN PE=1 SV=2	0.211296	0	0.944547	1			3.56	0.69	0.157761	0	0	0	3	3	3	2	1	1	0	0	0	0	0	0	4	3	3	0	0	0	0	0	0	0	0	0	0	0	0	0	0	0	0	0	0	16.4133	23.01
1B53_HUMAN	P30491	HLA class I histocompatibility antigen, B-53 alpha chain OS=Homo sapiens GN=HLA-B PE=1 SV=1	0.846143	1.34634	0.811001	0.410757			4.99	0.71	0.033035	0	0	0	5	5	0	3	3	0	0	0	0	0	0	0	4	4	0	0	0	0	1	1	0	1	1	0	0	0	0	0	0	0	0	0	0	15.282	23.84
THOC6_HUMAN	Q86W42	THO complex subunit 6 homolog OS=Homo sapiens GN=THOC6 PE=1 SV=1	-0.166666	-0.0562731	0.906047	0.966298			3.01	0.68	0.007925	2	2	2	3	3	3	2	2	2	3	3	3	3	3	3	3	3	3	1	1	1	2	2	2	2	2	2	1	1	1	3	3	3	0	0	0	17.94	21.01
DCNL5_HUMAN	Q9BTE7	DCN1-like protein 5 OS=Homo sapiens GN=DCUN1D5 PE=1 SV=1	0.404086	-0.712173	0.746641	0.572205			2.01	0.64	0.052153	1	1	1	1	1	1	1	1	0	1	1	1	0	0	0	1	1	0	1	1	1	1	1	1	1	1	1	2	2	2	2	2	1	0	0	0	17.09	19.21
CYB5B_HUMAN	O43169	Cytochrome b5 type B OS=Homo sapiens GN=CYB5B PE=1 SV=2	2.37409	0	0.615302	1			3.96	0.67	0.00725	0	0	0	6	4	4	4	3	3	0	0	0	0	0	0	5	3	3	0	0	0	0	0	0	0	0	0	0	0	0	0	0	0	0	0	0	15.94	26.51
SKAP_HUMAN	Q9Y448	Small kinetochore-associated protein OS=Homo sapiens GN=KNSTRN PE=1 SV=2	-0.0333341	0.569771	0.978073	0.70616			3.05	0.73	0.011264	2	2	2	3	3	3	2	2	2	3	3	3	2	2	2	1	1	1	2	2	2	2	2	2	3	2	2	2	2	2	2	2	2	0	0	0	18.74	21.36
TPD54_HUMAN	O43399	Tumor protein D54 OS=Homo sapiens GN=TPD52L2 PE=1 SV=2	0.986666	-0.781447	0.635882	0.701762			3.7	0.72	0.060861	3	2	2	3	3	3	4	3	3	1	1	1	2	1	1	5	4	4	0	0	0	2	2	2	1	1	1	3	2	2	1	1	1	0	0	0	18.96	22.31
BRCC3_HUMAN	P46736	Lys-63-specific deubiquitinase BRCC36 OS=Homo sapiens GN=BRCC3 PE=1 SV=2	0.584423	-0.185154	0.748946	0.904665			3.62	0.6	0.103181	0	0	0	2	2	2	2	2	2	1	1	1	1	1	1	2	2	2	0	0	0	1	1	1	0	0	0	0	0	0	2	2	2	0	0	0	16.4433	20.01
1B59_HUMAN	Q29940	HLA class I histocompatibility antigen, B-59 alpha chain OS=Homo sapiens GN=HLA-B PE=2 SV=1	1.79404	1.36631	0.615915	0.369541			3.57	0.69	0.033035	0	0	0	4	4	0	2	2	0	0	0	0	0	0	0	3	3	0	0	0	0	1	1	0	1	1	0	0	0	0	0	0	0	0	0	0	17.016	23.85
MPCP_HUMAN	Q00325	Phosphate carrier protein, mitochondrial OS=Homo sapiens GN=SLC25A3 PE=1 SV=2	0.0900008	0.537637	0.983688	0.715737			4.43	0.76	0.007176	2	2	2	81	23	23	17	9	9	6	5	5	8	8	8	31	14	14	0	0	0	2	2	2	0	0	0	0	0	0	0	0	0	0	0	0	17.84	30.27
SOAT1_HUMAN	P35610	Sterol O-acyltransferase 1 OS=Homo sapiens GN=SOAT1 PE=1 SV=3	0.907352	0	0.785698	1			3.45	0.61	0.094634	0	0	0	5	4	4	3	3	3	1	1	1	0	0	0	6	5	5	0	0	0	0	0	0	0	0	0	0	0	0	0	0	0	0	0	0	16.0749	23.07
MBOA7_HUMAN	Q96N66	Lysophospholipid acyltransferase 7 OS=Homo sapiens GN=MBOAT7 PE=1 SV=2	0.0442839	0	0.978603	1			3.53	0.76	1.05307	0	0	0	1	1	1	1	1	1	0	0	0	0	0	0	2	1	1	0	0	0	0	0	0	0	0	0	0	0	0	0	0	0	0	0	0	15.8711	19.25
STX5_HUMAN	Q13190	Syntaxin-5 OS=Homo sapiens GN=STX5 PE=1 SV=2	0.290181	0	0.88929	1			1.91	0.45	0.037277	0	0	0	1	1	1	1	1	1	0	0	0	0	0	0	2	2	2	0	0	0	0	0	0	0	0	0	0	0	0	0	0	0	0	0	0	16.4012	19.03
APC1_HUMAN	Q9H1A4	Anaphase-promoting complex subunit 1 OS=Homo sapiens GN=ANAPC1 PE=1 SV=1	1.82601	-0.22343	0.144173	0.627181			2.59	0.61	0.154942	3	3	3	5	5	5	7	7	7	1	1	1	0	0	0	2	2	2	0	0	0	0	0	0	2	2	2	1	1	1	1	1	1	0	0	0	16.58	18.74
B4GT1_HUMAN	P15291	Beta-1,4-galactosyltransferase 1 OS=Homo sapiens GN=B4GALT1 PE=1 SV=5	0.075531	0	0.981898	1			2.84	0.54	0.037228	0	0	0	2	2	2	1	1	1	0	0	0	0	0	0	2	2	2	0	0	0	0	0	0	0	0	0	0	0	0	0	0	0	0	0	0	13.567	21.63
GALT2_HUMAN	Q10471	Polypeptide N-acetylgalactosaminyltransferase 2 OS=Homo sapiens GN=GALNT2 PE=1 SV=1	-0.0566667	-0.219804	0.981542	0.900289			4.42	0.76	0.040434	3	3	3	10	9	9	11	11	10	7	7	6	4	3	3	13	12	11	2	2	2	4	4	4	4	4	4	3	3	3	5	5	5	0	0	0	18.18	24.25
RNH2B_HUMAN	Q5TBB1	Ribonuclease H2 subunit B OS=Homo sapiens GN=RNASEH2B PE=1 SV=1	-0.108935	0	0.960898	1			1.8	0.64	0.430791	0	0	0	3	3	3	1	1	1	0	0	0	0	0	0	1	1	1	0	0	0	0	0	0	0	0	0	0	0	0	0	0	0	0	0	0	14.5365	20.91
UCRI_HUMAN	P47985	Cytochrome b-c1 complex subunit Rieske, mitochondrial OS=Homo sapiens GN=UQCRFS1 PE=1 SV=2	0.973289	0.184839	0.814042	0.870267			5.54	0.77	0.038073	0	0	0	14	8	1	6	4	1	1	1	0	3	3	0	7	6	0	0	0	0	0	0	0	1	1	0	0	0	0	0	0	0	0	0	0	16.0599	27.26
GBB2_HUMAN	P62879	Guanine nucleotide-binding protein G(I)/G(S)/G(T) subunit beta-2 OS=Homo sapiens GN=GNB2 PE=1 SV=3	1.17947	-2.12366	0.77932	0.165874			2.62	0.69	0.017271	0	0	0	4	4	0	1	1	0	0	0	0	1	1	0	5	4	0	0	0	0	0	0	0	0	0	0	1	1	0	0	0	0	0	0	0	15.7155	24.94
RFA1_HUMAN	P27694	Replication protein A 70 kDa DNA-binding subunit OS=Homo sapiens GN=RPA1 PE=1 SV=2	1.8543	0.977722	0.427098	0.609937			3.89	0.73	0.079719	2	2	2	3	3	3	2	2	2	1	1	1	0	0	0	3	3	3	2	2	2	5	5	5	0	0	0	1	1	1	1	1	1	0	0	0	18.01	21.09
DYST_HUMAN	Q03001	Dystonin OS=Homo sapiens GN=DST PE=1 SV=4	1.52119	0	0.489572	1			3.77	0.67	0.006876	0	0	0	14	14	14	4	4	4	0	0	0	1	1	1	7	7	7	0	0	0	0	0	0	0	0	0	0	0	0	0	0	0	0	0	0	14.6468	17.97
TMED5_HUMAN	Q9Y3A6	Transmembrane emp24 domain-containing protein 5 OS=Homo sapiens GN=TMED5 PE=1 SV=1	-0.23008	0	0.897028	1			2.39	0.46	0.349767	0	0	0	2	2	2	2	2	2	1	1	1	1	1	1	1	1	1	0	0	0	0	0	0	0	0	0	0	0	0	0	0	0	0	0	0	16.6398	21.74
WDR6_HUMAN	Q9NNW5	WD repeat-containing protein 6 OS=Homo sapiens GN=WDR6 PE=1 SV=1	0.486667	0.677872	0.75124	0.556768			3.53	0.68	0.015128	1	1	1	3	3	3	2	1	1	2	2	2	1	1	1	1	1	1	5	4	4	4	3	3	4	4	4	4	4	4	5	5	5	0	0	0	15.83	20.11
FXR1_HUMAN	P51114	Fragile X mental retardation syndrome-related protein 1 OS=Homo sapiens GN=FXR1 PE=1 SV=3	-0.136666	0.851238	0.93741	0.591827			6.29	0.76	0.01138	7	6	6	15	13	13	9	9	9	8	7	7	7	7	6	12	12	11	4	4	3	3	3	1	1	1	1	2	2	1	1	1	0	0	0	0	20.45	24.45
THIM_HUMAN	P42765	3-ketoacyl-CoA thiolase, mitochondrial OS=Homo sapiens GN=ACAA2 PE=1 SV=2	0.556825	0.785858	0.910553	0.768878			5.29	0.75	0.010905	0	0	0	15	13	13	0	0	0	0	0	0	0	0	0	5	5	5	0	0	0	9	9	9	8	8	8	3	3	3	3	3	3	0	0	0	16.6989	26.56
ZMAT2_HUMAN	Q96NC0	Zinc finger matrin-type protein 2 OS=Homo sapiens GN=ZMAT2 PE=1 SV=1	-1.02778	-2.29431	0.553616	0.188289			2.51	0.51	0.044339	3	3	3	0	0	0	3	3	3	4	4	4	2	2	2	2	2	2	0	0	0	0	0	0	1	1	1	2	2	2	1	1	1	0	0	0	18.93	16.6267
CISD2_HUMAN	Q8N5K1	CDGSH iron-sulfur domain-containing protein 2 OS=Homo sapiens GN=CISD2 PE=1 SV=1	1.527	0	0.717741	1			2.88	0.61	0.26727	0	0	0	4	4	4	1	1	1	0	0	0	0	0	0	5	4	4	0	0	0	0	0	0	0	0	0	0	0	0	0	0	0	0	0	0	16.0107	24.83
STMN2_HUMAN	Q93045	Stathmin-2 OS=Homo sapiens GN=STMN2 PE=1 SV=3	0.126565	-2.23625	0.963159	0.0651095			2.19	0.67	0.129001	1	1	0	0	0	0	1	1	0	0	0	0	0	0	0	2	2	1	0	0	0	0	0	0	0	0	0	0	0	0	1	1	1	0	0	0	19.93	16.0014
SRBS2_HUMAN	O94875	Sorbin and SH3 domain-containing protein 2 OS=Homo sapiens GN=SORBS2 PE=1 SV=3	-0.950623	0	0.71166	1			3.32	0.68	0.365428	0	0	0	2	2	2	0	0	0	2	2	2	0	0	0	3	3	3	0	0	0	0	0	0	0	0	0	0	0	0	0	0	0	0	0	0	14.23	20.29
DHAK_HUMAN	Q3LXA3	Bifunctional ATP-dependent dihydroxyacetone kinase/FAD-AMP lyase (cyclizing) OS=Homo sapiens GN=DAK PE=1 SV=2	0	-2.56864	1	0.138833			1.68	0.36	0.745619	0	0	0	0	0	0	0	0	0	0	0	0	0	0	0	0	0	0	0	0	0	1	1	1	0	0	0	2	2	2	1	1	1	0	0	0	14.5863	17.0929
P5CR2_HUMAN	Q96C36	Pyrroline-5-carboxylate reductase 2 OS=Homo sapiens GN=PYCR2 PE=1 SV=1	2.30696	0.210654	0.570275	0.851807			5.17	0.67	0.014173	0	0	0	12	10	10	3	3	3	0	0	0	0	0	0	5	4	4	0	0	0	0	0	0	1	1	1	0	0	0	0	0	0	0	0	0	16.2355	25.56
ABCD1_HUMAN	P33897	ATP-binding cassette sub-family D member 1 OS=Homo sapiens GN=ABCD1 PE=1 SV=2	0.632146	0	0.800445	1			2.98	0.61	0.00882	0	0	0	3	3	2	1	1	1	0	0	0	0	0	0	3	3	2	0	0	0	0	0	0	0	0	0	0	0	0	0	0	0	0	0	0	16.1188	21.16
QCR8_HUMAN	O14949	Cytochrome b-c1 complex subunit 8 OS=Homo sapiens GN=UQCRQ PE=1 SV=4	2.01882	0	0.71466	1			3.64	0.78	0.025219	0	0	0	6	3	3	2	2	2	0	0	0	2	2	2	3	2	2	0	0	0	0	0	0	0	0	0	0	0	0	0	0	0	0	0	0	15.6463	28.8
RT07_HUMAN	Q9Y2R9	28S ribosomal protein S7, mitochondrial OS=Homo sapiens GN=MRPS7 PE=1 SV=2	1.83002	0	0.683923	1			4.47	0.67	0.05316	0	0	0	16	12	12	2	2	2	0	0	0	0	0	0	8	7	7	0	0	0	0	0	0	0	0	0	0	0	0	0	0	0	0	0	0	14.9878	26.07
MTX3_HUMAN	Q5HYI7	Metaxin-3 OS=Homo sapiens GN=MTX3 PE=1 SV=2	-1.66548	0	0.694149	1			3.62	0.71	0.08521	0	0	0	6	6	6	0	0	0	0	0	0	1	1	1	3	3	3	0	0	0	0	0	0	0	0	0	0	0	0	0	0	0	0	0	0	15.3625	24.62
PRAF3_HUMAN	O75915	PRA1 family protein 3 OS=Homo sapiens GN=ARL6IP5 PE=1 SV=1	0.6	1.12011	0.828315	0.572954			3.28	0.67	0.01146	1	1	1	4	3	3	2	2	2	1	1	1	1	1	1	6	3	3	1	1	1	1	1	1	2	2	2	2	2	2	1	1	1	0	0	0	18.23	25.15
PNPO_HUMAN	Q9NVS9	Pyridoxine-5'-phosphate oxidase OS=Homo sapiens GN=PNPO PE=1 SV=1	1.28333	-0.689319	0.444123	0.599605			2.49	0.57	0.084602	2	2	2	2	2	2	3	3	3	1	1	1	1	1	1	2	2	2	1	1	1	1	1	1	1	1	1	1	1	1	2	2	2	0	0	0	18.9	21.68
CHCH6_HUMAN	Q9BRQ6	Coiled-coil-helix-coiled-coil-helix domain-containing protein 6, mitochondrial OS=Homo sapiens GN=CHCHD6 PE=1 SV=1	2.57142	0	0.463875	1			2.86	0.62	0.032792	0	0	0	6	5	5	1	1	1	0	0	0	0	0	0	1	1	1	0	0	0	0	0	0	0	0	0	0	0	0	0	0	0	0	0	0	15.524	23.78
ACACA_HUMAN	Q13085	Acetyl-CoA carboxylase 1 OS=Homo sapiens GN=ACACA PE=1 SV=2	0.57	0.591457	0.737504	0.334703			4.34	0.65	0.016161	4	4	3	8	8	7	8	8	7	3	3	3	3	3	2	7	7	6	3	3	2	7	7	6	4	4	3	3	3	3	2	2	1	0	0	0	15.91	19.73
NDUA9_HUMAN	Q16795	NADH dehydrogenase [ubiquinone] 1 alpha subcomplex subunit 9, mitochondrial OS=Homo sapiens GN=NDUFA9 PE=1 SV=2	2.87236	0	0.46359	1			4.31	0.73	0.003317	0	0	0	19	14	14	3	3	3	0	0	0	0	0	0	6	6	6	0	0	0	0	0	0	0	0	0	0	0	0	0	0	0	0	0	0	16.7399	25.45
BACH_HUMAN	O00154	Cytosolic acyl coenzyme A thioester hydrolase OS=Homo sapiens GN=ACOT7 PE=1 SV=3	-0.00950845	1.64695	0.991329	0.377499			2.66	0.56	0.182378	0	0	0	0	0	0	1	1	1	0	0	0	0	0	0	0	0	0	0	0	0	3	3	3	2	2	2	1	1	1	0	0	0	0	0	0	15.1086	15.9792
ACINU_HUMAN	Q9UKV3	Apoptotic chromatin condensation inducer in the nucleus OS=Homo sapiens GN=ACIN1 PE=1 SV=2	0.126666	0.585837	0.948972	0.779497			3.21	0.63	0.002082	3	3	3	8	7	7	5	4	4	4	3	3	4	3	3	7	6	6	0	0	0	3	3	3	1	1	1	0	0	0	0	0	0	0	0	0	16.83	21.56
CD2AP_HUMAN	Q9Y5K6	CD2-associated protein OS=Homo sapiens GN=CD2AP PE=1 SV=1	1.30935	0	0.602695	1			1.7	0.44	0.00025	1	1	1	2	2	2	1	1	1	0	0	0	1	1	1	1	1	1	0	0	0	0	0	0	0	0	0	0	0	0	0	0	0	0	0	0	15.02	20.22
DPOE3_HUMAN	Q9NRF9	DNA polymerase epsilon subunit 3 OS=Homo sapiens GN=POLE3 PE=1 SV=1	0.54	0.392687	0.575258	0.824171			1.93	0.38	0.000543	2	2	2	1	1	1	1	1	1	1	1	1	2	2	2	1	1	1	1	1	1	1	1	1	1	1	1	1	1	1	1	1	1	0	0	0	20.66	21.78
KAP3_HUMAN	P31323	cAMP-dependent protein kinase type II-beta regulatory subunit OS=Homo sapiens GN=PRKAR2B PE=1 SV=3	1.92688	-2.03591	0.454098	0.226062			3.83	0.66	0.270907	0	0	0	2	2	0	0	0	0	0	0	0	0	0	0	0	0	0	0	0	0	0	0	0	1	1	0	1	1	0	1	1	0	0	0	0	14.1735	21.13
RRP7A_HUMAN	Q9Y3A4	Ribosomal RNA-processing protein 7 homolog A OS=Homo sapiens GN=RRP7A PE=1 SV=2	0.136667	0.0228434	0.937745	0.98568			2.6	0.69	0.095417	1	1	0	1	1	0	1	1	0	1	1	0	1	1	0	2	2	1	0	0	0	1	1	0	0	0	0	0	0	0	0	0	0	0	0	0	17.33	21.17
ZGPAT_HUMAN	Q8N5A5	Zinc finger CCCH-type with G patch domain-containing protein OS=Homo sapiens GN=ZGPAT PE=1 SV=3	0	-1.88633	1	0.488329			2.46	0.61	0.177583	0	0	0	0	0	0	0	0	0	0	0	0	0	0	0	0	0	0	4	4	4	0	0	0	2	2	2	3	3	3	4	4	4	0	0	0	15.3263	15.9582
CD032_HUMAN	Q8N8J7	Uncharacterized protein C4orf32 OS=Homo sapiens GN=C4orf32 PE=1 SV=2	0.158131	0	0.945383	1			2.81	0.59	0.008949	0	0	0	1	1	1	1	1	1	0	0	0	0	0	0	2	2	2	0	0	0	0	0	0	0	0	0	0	0	0	0	0	0	0	0	0	15.5643	20.48
AATF_HUMAN	Q9NY61	Protein AATF OS=Homo sapiens GN=AATF PE=1 SV=1	0.363333	1.1857	0.73246	0.397463			3.8	0.71	0.095012	2	2	2	1	1	1	1	1	1	2	2	2	2	2	2	1	1	1	2	2	2	1	1	1	3	3	3	1	1	1	2	2	2	0	0	0	19.14	21.3
AK1A1_HUMAN	P14550	Alcohol dehydrogenase [NADP(+)] OS=Homo sapiens GN=AKR1A1 PE=1 SV=3	3.90698	-0.110226	0.0806541	0.964056			3.01	0.63	0.170887	3	3	3	3	3	3	3	3	3	2	2	2	3	3	3	0	0	0	1	1	1	3	3	3	4	4	4	4	3	3	4	3	3	0	0	0	19.53	23.2
PPID_HUMAN	Q08752	Peptidyl-prolyl cis-trans isomerase D OS=Homo sapiens GN=PPID PE=1 SV=3	-0.591416	0.0634181	0.762068	0.96137			2.17	0.59	0.208754	0	0	0	1	1	1	0	0	0	0	0	0	0	0	0	1	1	1	0	0	0	2	2	2	2	2	2	2	2	2	1	1	1	0	0	0	14.3353	19.61
MOB1A_HUMAN	Q9H8S9	MOB kinase activator 1A OS=Homo sapiens GN=MOB1A PE=1 SV=4	1.02	-0.0315444	0.593723	0.989263			2.87	0.64	0.075753	2	2	0	3	3	0	2	2	0	2	2	0	1	1	0	2	2	0	1	1	0	4	3	0	1	1	0	3	2	0	3	3	0	0	0	0	19.7	23.13
COMT_HUMAN	P21964	Catechol O-methyltransferase OS=Homo sapiens GN=COMT PE=1 SV=2	1.29512	-0.693861	0.673096	0.734166			3.27	0.7	0.011573	0	0	0	4	4	4	1	1	1	0	0	0	0	0	0	2	2	2	0	0	0	2	1	1	1	1	1	0	0	0	1	1	1	0	0	0	16.3075	21.34
ANM5_HUMAN	O14744	Protein arginine N-methyltransferase 5 OS=Homo sapiens GN=PRMT5 PE=1 SV=4	0.00666618	1.64644	0.997207	0.326229			2.94	0.7	0.050332	3	3	3	4	4	4	1	1	1	2	2	2	3	3	3	6	6	6	4	4	4	5	4	4	5	5	5	2	2	2	4	4	4	0	0	0	19.06	22.22
SNX5_HUMAN	Q9Y5X3	Sorting nexin-5 OS=Homo sapiens GN=SNX5 PE=1 SV=1	0	-2.17802	1	0.34909			2.32	0.54	0.450134	0	0	0	0	0	0	0	0	0	0	0	0	0	0	0	0	0	0	0	0	0	1	1	1	1	1	1	2	2	2	4	4	4	0	0	0	16.9273	14.5827
NSF_HUMAN	P46459	Vesicle-fusing ATPase OS=Homo sapiens GN=NSF PE=1 SV=3	0.89728	-0.199686	0.801977	0.877352			3.8	0.67	0.061339	0	0	0	8	8	8	0	0	0	0	0	0	1	1	1	9	9	9	0	0	0	2	2	2	1	1	1	1	1	1	0	0	0	0	0	0	16.2988	23.32
LYSM2_HUMAN	Q8IV50	LysM and putative peptidoglycan-binding domain-containing protein 2 OS=Homo sapiens GN=LYSMD2 PE=1 SV=1	0	-2.54666	1	0.307603			2.79	0.53	0.556073	0	0	0	0	0	0	0	0	0	0	0	0	0	0	0	0	0	0	1	1	1	1	1	0	1	1	0	1	1	1	2	2	1	0	0	0	16.0564	14.7243
NDUA2_HUMAN	O43678	NADH dehydrogenase [ubiquinone] 1 alpha subcomplex subunit 2 OS=Homo sapiens GN=NDUFA2 PE=1 SV=3	1.35816	0	0.743973	1			3.74	0.68	0.103065	0	0	0	5	4	4	1	1	1	0	0	0	0	0	0	3	3	3	0	0	0	0	0	0	0	0	0	0	0	0	0	0	0	0	0	0	14.4534	25.62
EMC7_HUMAN	Q9NPA0	ER membrane protein complex subunit 7 OS=Homo sapiens GN=EMC7 PE=1 SV=1	0.830407	0	0.812896	1			3.13	0.61	0.102495	0	0	0	6	3	3	2	2	2	1	1	1	0	0	0	5	3	3	0	0	0	0	0	0	0	0	0	0	0	0	0	0	0	0	0	0	15.8202	24.37
DHX57_HUMAN	Q6P158	Putative ATP-dependent RNA helicase DHX57 OS=Homo sapiens GN=DHX57 PE=1 SV=2	-0.706573	0.660232	0.632673	0.424674			2.27	0.47	0.583114	2	2	0	0	0	0	0	0	0	0	0	0	2	2	1	2	2	2	1	1	0	0	0	0	0	0	0	0	0	0	0	0	0	0	0	0	17.61	15.8466
ASCC3_HUMAN	Q8N3C0	Activating signal cointegrator 1 complex subunit 3 OS=Homo sapiens GN=ASCC3 PE=1 SV=3	-0.633333	0.748683	0.789433	0.147047			3.44	0.73	0.012586	2	2	2	13	13	13	13	12	12	5	5	5	7	7	7	13	13	13	4	4	4	4	4	4	3	3	3	3	2	2	2	2	2	0	0	0	14.1	20.61
GLSK_HUMAN	O94925	Glutaminase kidney isoform, mitochondrial OS=Homo sapiens GN=GLS PE=1 SV=1	2.35837	0.314201	0.354651	0.70673			4.16	0.74	0.032	0	0	0	4	3	3	0	0	0	0	0	0	0	0	0	0	0	0	0	0	0	1	1	1	1	1	1	0	0	0	0	0	0	0	0	0	14.5992	22.04
FUBP3_HUMAN	Q96I24	Far upstream element-binding protein 3 OS=Homo sapiens GN=FUBP3 PE=1 SV=2	0.756666	0.736155	0.723482	0.705274			3.82	0.68	0.048902	2	2	2	2	2	2	4	4	3	1	1	1	1	1	1	6	6	6	7	7	7	2	1	1	3	3	3	6	6	6	2	1	1	0	0	0	18.25	21.71
RM27_HUMAN	Q9P0M9	39S ribosomal protein L27, mitochondrial OS=Homo sapiens GN=MRPL27 PE=1 SV=1	2.79022	0	0.487769	1			3.88	0.66	0.171633	0	0	0	7	5	5	2	2	2	0	0	0	0	0	0	4	3	3	0	0	0	0	0	0	0	0	0	0	0	0	0	0	0	0	0	0	16.1232	26
NIPS1_HUMAN	Q9BPW8	Protein NipSnap homolog 1 OS=Homo sapiens GN=NIPSNAP1 PE=1 SV=1	1.66667	2.12497	0.711109	0.262707			4.32	0.74	0.001245	0	0	0	13	10	9	2	2	1	0	0	0	1	1	0	6	4	3	2	2	1	3	2	1	3	2	1	2	2	2	1	1	0	0	0	0	15.3232	27.2
RBBP6_HUMAN	Q7Z6E9	E3 ubiquitin-protein ligase RBBP6 OS=Homo sapiens GN=RBBP6 PE=1 SV=1	0.47249	0.0114803	0.679924	0.987615			3.1	0.69	0.182497	0	0	0	2	2	2	0	0	0	1	1	1	0	0	0	2	2	2	0	0	0	1	1	1	0	0	0	0	0	0	0	0	0	0	0	0	15.7524	18.02
MPRI_HUMAN	P11717	Cation-independent mannose-6-phosphate receptor OS=Homo sapiens GN=IGF2R PE=1 SV=3	-0.0132081	0.993997	0.995744	0.395193			3.35	0.72	0.013038	0	0	0	8	7	7	3	3	3	2	2	2	0	0	0	8	8	8	0	0	0	1	1	1	0	0	0	0	0	0	0	0	0	0	0	0	14.8462	20.26
ECH1_HUMAN	Q13011	Delta(3,5)-Delta(2,4)-dienoyl-CoA isomerase, mitochondrial OS=Homo sapiens GN=ECH1 PE=1 SV=2	2.02	0.511629	0.613545	0.813829			7.57	0.76	0.032634	1	1	1	23	12	12	8	5	5	1	1	1	2	2	2	10	6	6	1	1	1	3	3	3	3	3	3	2	2	2	3	3	3	0	0	0	17.32	26.77
PYC_HUMAN	P11498	Pyruvate carboxylase, mitochondrial OS=Homo sapiens GN=PC PE=1 SV=2	1.05662	-0.0551198	0.829601	0.946257			6.47	0.74	0.014181	0	0	0	39	28	28	1	1	1	0	0	0	0	0	0	10	10	10	0	0	0	2	2	2	0	0	0	0	0	0	0	0	0	0	0	0	13.4815	26.61
[truncated: 1,258 more rows]
[truncated: 10 more columns]

## Sheet: SLIM
name	accession	description	ratio log2 B56AWT-B56A2R	ratio log2 B56GWT-B56G2R	p-value B56AWT-B56A2R	p-value log2 B56GWT-B56G2R	q-value B56AWT-B56A2R (BH correction)	q-value B56GWT-B56G2R (BH correction)	xcorr_max	dcn_max	ppm_min	tp[B56AWT_1]	up[B56AWT_1]	um[B56AWT_1]	tp[B56AWT_2]	up[B56AWT_2]	um[B56AWT_2]	tp[B56AWT_3]	up[B56AWT_3]	um[B56AWT_3]	tp[B56A2R_1]	up[B56A2R_1]	um[B56A2R_1]	tp[B56A2R_2]	up[B56A2R_2]	um[B56A2R_2]	tp[B56A2R_3]	up[B56A2R_3]	um[B56A2R_3]	tp[B56GWT_1]	up[B56GWT_1]	um[B56GWT_1]	tp[B56GWT_2]	up[B56GWT_2]	um[B56GWT_2]	tp[B56GWT_3]	up[B56GWT_3]	um[B56GWT_3]	tp[B56G2R_1]	up[B56G2R_1]	um[B56G2R_1]	tp[B56G2R_2]	up[B56G2R_2]	um[B56G2R_2]	tp[B56G2R_3]	up[B56G2R_3]	um[B56G2R_3]	log2 ibaq_B56AWT_1	log2 ibaq_B56AWT_2
[truncated: 48 more rows]
[truncated: 10 more columns]
