# Supplementary material for: A dynamic charge-charge interaction modulates PP2A:B56 substrate recruitment
Source: eLife. 2020 Mar 20;9:e55966. doi: 10.7554/eLife.55966 (PMC7108865; doi:10.7554/eLife.55966)
Supplement: Figure 4—source data 1. [file elife-55966-fig4-data1.xlsx]

## Sheet: description
Column	KIF4A
column A	protein name
column B	protein description
column C	maximum xcorr parameter for protein identidication
column D	maximum dcn parameter for protein identidication
column E	minimum part per million parameter for protein identidication
column F	total peptides [yfp control 1]
column G	unique peptides [yfp control 1]
column H	unique matches [yfp control 1]
column I	total peptides [yfp control 2]
column J	unique peptides [yfp control 2]
column K	unique matches [yfp control 2]
column L	total peptides [yfp control 3]
column M	unique peptides [yfp control 3]
column N	unique matches [yfp control 3]
column O	total peptides [yfp kif4a wt 1]
column P	unique peptides [yfp kif4a wt 1]
column Q	unique matches [yfp kif4a wt 1]
column R	total peptides [yfp kif4a wt 2]
column S	unique peptides [yfp kif4a wt 2]
column T	unique matches [yfp kif4a wt 2]
column U	total peptides [yfp kif4a wt 3]
column V	unique peptides [yfp kif4a wt 3]
column W	unique matches [yfp kif4a wt 3]
column X	total peptides [yfp kif4a LE1]
column Y	unique peptides [yfp kif4a LE1]
column Z	unique matches [yfp kif4a LE1]
column AA	total peptides [yfp kif4a LE2]
column AB	unique peptides [yfp kif4a LE2]
column AC	unique matches [yfp kif4a LE2]
column AD	total peptides [yfp kif4a LE3]
column AE	unique peptides [yfp kif4a LE3]
column AF	unique matches [yfp kif4a LE3]
column AG	total peptides [yfp kif4a BPM1]
column AH	unique peptides [yfp kif4a BPM1]
column AI	unique matches [yfp kif4a BPM1]
column AJ	total peptides [yfp kif4a BPM2]
column AK	unique peptides [yfp kif4a BPM2]
column AL	unique matches [yfp kif4a BPM2]
column AM	total peptides [yfp kif4a BPM3]
column AN	unique peptides [yfp kif4a BPM3]
column AO	unique matches [yfp kif4a BPM3]
column AP	total peptides [yfp kif4a LE+BPM1]
column AQ	unique peptides [yfp kif4a LE+BPM1]
column AR	unique matches [yfp kif4a LE+BPM1]
column AS	total peptides [yfp kif4a LE+BPM2]
column AT	unique peptides [yfp kif4a LE+BPM2]
column AU	unique matches [yfp kif4a LE+BPM2]
column AV	total peptides [yfp kif4a LE+BPM3]
column AW	unique peptides [yfp kif4a LE+BPM3]
column AX	unique matches [yfp kif4a LE+BPM3]
column AY	total peptides [yfp kif4a I227A 1]
column AZ	unique peptides [yfp kif4a I227A 1]
column BA	unique matches [yfp kif4a I227A 1]
column BB	total peptides [yfp kif4a I227A 2]
column BC	unique peptides [yfp kif4a I227A 2]
column BD	unique matches [yfp kif4a I227A 2]
column BE	total peptides [yfp kif4a I227A 3]
column BF	unique peptides [yfp kif4a I227A 3]
column BG	unique matches [yfp kif4a I227A 3]
column BH	log2 ibaq area yfp 1
column BI	log2 ibaq area yfp 2
column BJ	log2 ibaq area yfp 3
column BK	log2 ibaq area yfp kif4a wt 1
column BL	log2 ibaq area yfp kif4a wt 2
column BM	log2 ibaq area yfp kif4a wt 3
column BN	log2 ibaq area yfp kif4a LE 1
column BO	log2 ibaq area yfp kif4a LE 2
column BP	log2 ibaq area yfp kif4a LE 3
column BQ	log2 ibaq area yfp kif4a BPM 1
column BR	log2 ibaq area yfp kif4a BPM 2
column BS	log2 ibaq area yfp kif4a BPM 3
column BT	log2 ibaq area yfp kif4a LE+BPM 1
column BU	log2 ibaq area yfp kif4a LE+BPM 2
column BV	log2 ibaq area yfp kif4a LE+BPM 3
column BW	log2 ibaq area yfp kif4a I227A 1
column BX	log2 ibaq area yfp kif4a I227A 3
column BY	log2 ibaq area yfp kif4a I227A 2
column BZ	log 2 ratio yfp kif4a LE - wt
column CA	log 2 ratio yfp kif4a BPM - wt
column CB	log 2 ratio yfp kif4a LE+BPM - wt
column CC	log 2 ratio yfp kif4a I227A - wt
column CD	pvalue yfp kif4a LE - wt
column CE	pvalue yfp kif4a BPM - wt
column CF	pvalue yfp kif4a LE+BPM - wt
column CG	pvalue yfp kif4a I227A - wt

## Sheet: KIF4A
name	description	xcorr_max	dcn_max	ppm_min	tp[yfp control 1]	up[yfp control 1]	um[yfp control 1]	tp[yfp control 2]	up[yfp control 2]	um[yfp control 2]	tp[yfp control 3]	up[yfp control 3]	um[yfp control 3]	tp[yfp kif4a wt 1]	up[yfp kif4a wt 1]	um[yfp kif4a wt 1]	tp[yfp kif4a wt 2]	up[yfp kif4a wt 2]	um[yfp kif4a wt 2]	tp[yfp kif4a wt 3]	up[yfp kif4a wt 3]	um[yfp kif4a wt 3]	tp[yfp kif4a LE1]	up[yfp kif4a LE1]	um[yfp kif4a LE1]	tp[yfp kif4a LE2]	up[yfp kif4a LE2]	um[yfp kif4a LE2]	tp[yfp kif4a LE3]	up[yfp kif4a LE3]	um[yfp kif4a LE3]	tp[yfp kif4a BPM1]	up[yfp kif4a BPM1]	um[yfp kif4a BPM1]	tp[yfp kif4a BPM2]	up[yfp kif4a BPM2]	um[yfp kif4a BPM2]	tp[yfp kif4a BPM3]	up[yfp kif4a BPM3]	um[yfp kif4a BPM3]	tp[yfp kif4a LE+BPM1]	up[yfp kif4a LE+BPM1]	um[yfp kif4a LE+BPM1]	tp[yfp kif4a LE+BPM2]	up[yfp kif4a LE+BPM2]	um[yfp kif4a LE+BPM2]	tp[yfp kif4a LE+BPM3]	up[yfp kif4a LE+BPM3]	um[yfp kif4a LE+BPM3]
PP2AA_HUMAN	Serine/threonine-protein phosphatase 2A catalytic subunit alpha isoform OS=Homo sapiens GN=PPP2CA PE=1 SV=1	2.068	0.6193	0.041001	4	4	1	3	3	1	3	3	1	2	2	0	2	2	1	4	4	1	2	2	1	3	3	1	5	5	1	2	2	1	2	2	1	1	1	0	3	3	1	1	1	0	2	2	1
PP2AB_HUMAN	Serine/threonine-protein phosphatase 2A catalytic subunit beta isoform OS=Homo sapiens GN=PPP2CB PE=1 SV=1	2.068	0.6193	0.041001	3	3	0	2	2	0	2	2	0	2	2	0	1	1	0	3	3	0	1	1	0	2	2	0	4	4	0	1	1	0	1	1	0	1	1	0	2	2	0	1	1	0	1	1	0
KIF4A_HUMAN	Chromosome-associated kinesin KIF4A OS=Homo sapiens GN=KIF4A PE=1 SV=3	5.24	0.8274	0.000505	3	3	1	4	4	1	5	5	3	816	108	67	684	100	58	414	90	51	1427	74	44	568	79	45	440	88	55	795	90	55	698	81	46	411	87	54	818	87	51	560	71	41	520	74	44
CND1_HUMAN	Condensin complex subunit 1 OS=Homo sapiens GN=NCAPD2 PE=1 SV=3	2.387	0.6456	0.042451	0	0	0	0	0	0	0	0	0	7	7	7	3	3	3	5	5	5	2	2	2	3	3	3	15	14	14	0	0	0	0	0	0	0	0	0	1	1	1	0	0	0	0	0	0
CND2_HUMAN	Condensin complex subunit 2 OS=Homo sapiens GN=NCAPH PE=1 SV=3	3.473	0.7288	0.007811	5	5	5	1	1	1	4	4	4	22	15	15	14	13	13	19	15	15	19	9	9	13	10	10	27	21	21	2	2	2	2	2	2	3	3	3	4	4	4	2	2	2	2	2	2
CND3_HUMAN	Condensin complex subunit 3 OS=Homo sapiens GN=NCAPG PE=1 SV=1	3.713	0.7544	0.007796	0	0	0	0	0	0	0	0	0	22	20	20	10	10	10	13	12	12	10	9	9	10	9	9	18	17	17	0	0	0	0	0	0	0	0	0	0	0	0	0	0	0	0	0	0
DNJC9_HUMAN	DnaJ homolog subfamily C member 9 OS=Homo sapiens GN=DNAJC9 PE=1 SV=1	2.797	0.6756	0.015826	1	1	1	0	0	0	1	1	1	4	4	4	3	3	3	6	5	5	1	1	1	3	2	2	7	6	6	0	0	0	1	1	1	6	5	5	1	1	1	1	1	1	0	0	0
KIF2A_HUMAN	Kinesin-like protein KIF2A OS=Homo sapiens GN=KIF2A PE=1 SV=3	3.502	0.7106	0.002122	0	0	0	1	1	1	0	0	0	5	5	5	5	5	5	5	5	5	1	1	1	1	1	1	8	7	7	7	7	6	3	3	2	11	10	9	5	5	5	4	4	4	9	8	7
KIF3A_HUMAN	Kinesin-like protein KIF3A OS=Homo sapiens GN=KIF3A PE=1 SV=4	2.719	0.5976	0.001967	0	0	0	0	0	0	0	0	0	50	1	0	41	1	0	16	1	0	13	1	0	9	1	0	17	1	0	21	1	0	29	1	0	16	1	0	53	1	0	16	1	0	8	1	0
KIF6_HUMAN	Kinesin-like protein KIF6 OS=Homo sapiens GN=KIF6 PE=1 SV=3	2.719	0.5976	0.001967	0	0	0	0	0	0	0	0	0	50	1	0	41	1	0	16	1	0	13	1	0	9	1	0	17	1	0	21	1	0	29	1	0	16	1	0	53	1	0	16	1	0	8	1	0
PRC1_HUMAN	Protein regulator of cytokinesis 1 OS=Homo sapiens GN=PRC1 PE=1 SV=2	2.118	0.6428	0.011228	0	0	0	0	0	0	0	0	0	7	6	6	3	3	3	6	6	6	1	1	1	4	4	4	5	5	5	1	1	1	1	1	1	1	1	1	4	4	4	1	1	1	2	2	2
SMC2_HUMAN	Structural maintenance of chromosomes protein 2 OS=Homo sapiens GN=SMC2 PE=1 SV=2	3.352	0.7097	0.004931	14	14	14	2	2	2	8	8	8	43	34	34	29	27	27	33	32	32	16	14	14	21	21	21	46	39	39	3	3	3	1	1	1	3	3	3	4	4	4	1	1	1	6	6	6
SMC4_HUMAN	Structural maintenance of chromosomes protein 4 OS=Homo sapiens GN=SMC4 PE=1 SV=2	3.64	0.7644	0.000342	11	11	11	7	7	7	8	8	8	43	39	39	34	32	32	31	30	30	19	17	17	25	24	24	47	38	38	3	3	3	4	4	4	4	4	4	8	8	8	3	3	3	5	5	5
SP16H_HUMAN	FACT complex subunit SPT16 OS=Homo sapiens GN=SUPT16H PE=1 SV=1	2.498	0.7179	0.023046	2	2	2	1	1	1	3	3	3	9	9	9	4	4	4	6	6	6	3	3	3	4	4	4	14	14	14	0	0	0	0	0	0	5	5	5	2	2	2	1	1	1	2	2	2
TOP2A_HUMAN	DNA topoisomerase 2-alpha OS=Homo sapiens GN=TOP2A PE=1 SV=3	4.162	0.7477	0.02045	0	0	0	2	2	2	1	1	1	21	21	14	16	16	12	12	12	11	3	3	2	9	9	7	33	32	23	0	0	0	0	0	0	21	21	14	1	1	0	0	0	0	0	0	0
MCM7_HUMAN	DNA replication licensing factor MCM7 OS=Homo sapiens GN=MCM7 PE=1 SV=4	3.124	0.7648	0.001186	7	7	7	2	2	2	3	3	3	5	5	5	2	2	2	5	5	5	2	2	2	2	2	2	8	8	8	2	2	2	1	1	1	3	3	3	2	2	2	1	1	1	2	2	2
LDHA_HUMAN	L-lactate dehydrogenase A chain OS=Homo sapiens GN=LDHA PE=1 SV=2	4.592	0.649	0.010242	22	16	16	6	5	5	19	16	16	21	11	11	12	9	9	22	14	14	4	2	2	12	8	8	18	12	12	11	7	7	7	6	6	15	11	11	21	12	12	6	5	5	12	7	7
SH3G2_HUMAN	Endophilin-A1 OS=Homo sapiens GN=SH3GL2 PE=1 SV=1	1.399	0.3095	0.279281	1	1	0	0	0	0	0	0	0	1	1	0	0	0	0	1	1	0	0	0	0	0	0	0	0	0	0	0	0	0	0	0	0	0	0	0	0	0	0	0	0	0	0	0	0
KC1A_HUMAN	Casein kinase I isoform alpha OS=Homo sapiens GN=CSNK1A1 PE=1 SV=2	2.198	0.5177	1.28781	1	1	0	0	0	0	0	0	0	0	0	0	0	0	0	0	0	0	0	0	0	0	0	0	0	0	0	0	0	0	0	0	0	0	0	0	0	0	0	0	0	0	0	0	0
SRPRB_HUMAN	Signal recognition particle receptor subunit beta OS=Homo sapiens GN=SRPRB PE=1 SV=3	2.683	0.7733	0.028856	1	1	1	1	1	1	1	1	1	1	1	1	1	1	1	3	3	3	0	0	0	0	0	0	1	1	1	0	0	0	0	0	0	1	1	1	1	1	1	0	0	0	0	0	0
CAPR1_HUMAN	Caprin-1 OS=Homo sapiens GN=CAPRIN1 PE=1 SV=2	2.763	0.6417	0.031174	3	3	3	2	2	2	3	3	3	5	5	5	3	3	3	5	5	5	3	3	3	0	0	0	3	3	3	3	3	3	2	2	2	3	3	3	4	4	4	1	1	1	3	3	3
ABCF1_HUMAN	ATP-binding cassette sub-family F member 1 OS=Homo sapiens GN=ABCF1 PE=1 SV=2	2.961	0.7688	0.002818	5	5	5	2	2	2	3	3	3	6	6	5	3	3	3	5	5	5	0	0	0	2	2	2	7	7	6	2	2	2	1	1	1	5	5	5	3	3	3	0	0	0	2	2	2
K121P_HUMAN	Keratin-81-like protein KRT121P OS=Homo sapiens GN=KRT121P PE=5 SV=4	2.792	0.6699	0.005122	0	0	0	0	0	0	9	7	0	9	8	0	2	2	0	1	1	0	1	1	0	5	5	0	1	1	0	4	4	0	2	2	0	2	2	0	0	0	0	0	0	0	0	0	0
PSME2_HUMAN	Proteasome activator complex subunit 2 OS=Homo sapiens GN=PSME2 PE=1 SV=4	1.94	0.6438	0.059078	1	1	1	0	0	0	1	1	1	1	1	1	0	0	0	0	0	0	0	0	0	0	0	0	0	0	0	0	0	0	0	0	0	0	0	0	1	1	1	0	0	0	2	2	2
1A74_HUMAN	HLA class I histocompatibility antigen, A-74 alpha chain OS=Homo sapiens GN=HLA-A PE=1 SV=1	2.621	0.7085	0.054574	2	2	0	1	1	0	2	2	0	0	0	0	0	0	0	1	1	0	0	0	0	0	0	0	0	0	0	0	0	0	0	0	0	0	0	0	1	1	0	1	1	0	0	0	0
GDIB_HUMAN	Rab GDP dissociation inhibitor beta OS=Homo sapiens GN=GDI2 PE=1 SV=2	2.434	0.7464	0.003791	8	8	5	2	2	1	9	9	7	9	8	4	5	5	4	8	7	6	2	2	1	3	3	2	3	3	2	6	6	5	4	4	3	5	5	4	5	5	4	6	6	5	5	5	4
NCRP1_HUMAN	Non-specific cytotoxic cell receptor protein 1 homolog OS=Homo sapiens GN=NCCRP1 PE=1 SV=1	2.951	0.3594	0.123987	0	0	0	0	0	0	0	0	0	0	0	0	0	0	0	0	0	0	0	0	0	0	0	0	0	0	0	0	0	0	0	0	0	0	0	0	0	0	0	0	0	0	0	0	0
K1C19_HUMAN	Keratin, type I cytoskeletal 19 OS=Homo sapiens GN=KRT19 PE=1 SV=4	2.541	0.6364	0.000365	12	8	0	13	7	0	14	8	0	24	10	1	23	8	1	24	9	0	57	6	1	27	6	1	21	8	0	22	7	0	26	9	2	26	8	0	13	6	0	21	6	1	20	6	0
TMED2_HUMAN	Transmembrane emp24 domain-containing protein 2 OS=Homo sapiens GN=TMED2 PE=1 SV=1	1.843	0.5643	0.00952	2	2	2	1	1	1	1	1	1	2	2	2	2	2	2	3	2	2	0	0	0	1	1	1	3	2	2	1	1	1	1	1	1	0	0	0	2	2	2	0	0	0	1	1	1
PSMD2_HUMAN	26S proteasome non-ATPase regulatory subunit 2 OS=Homo sapiens GN=PSMD2 PE=1 SV=3	4.078	0.7573	0.000339	19	17	17	11	10	10	17	16	16	9	8	8	3	3	3	10	9	9	2	2	2	2	2	2	6	6	6	2	2	2	2	2	2	3	3	3	3	3	3	0	0	0	2	2	2
TNPO2_HUMAN	Transportin-2 OS=Homo sapiens GN=TNPO2 PE=1 SV=3	1.319	0.1729	0.949267	1	1	0	0	0	0	0	0	0	0	0	0	0	0	0	0	0	0	0	0	0	0	0	0	0	0	0	0	0	0	0	0	0	0	0	0	0	0	0	0	0	0	0	0	0
RL38_HUMAN	60S ribosomal protein L38 OS=Homo sapiens GN=RPL38 PE=1 SV=2	3.142	0.6232	0.002595	10	5	5	1	1	1	2	2	2	4	2	2	2	1	1	4	1	1	2	1	1	0	0	0	0	0	0	3	1	1	1	1	1	5	2	2	6	2	2	1	1	1	3	1	1
GSTO1_HUMAN	Glutathione S-transferase omega-1 OS=Homo sapiens GN=GSTO1 PE=1 SV=2	2.039	0.576	0.368451	2	2	2	0	0	0	1	1	1	1	1	1	0	0	0	0	0	0	0	0	0	0	0	0	1	1	1	1	1	1	0	0	0	0	0	0	2	2	2	1	1	1	1	1	1
BAG6_HUMAN	Large proline-rich protein BAG6 OS=Homo sapiens GN=BAG6 PE=1 SV=2	2.108	0.5904	0.183575	5	5	4	2	2	2	1	1	1	0	0	0	0	0	0	0	0	0	0	0	0	0	0	0	1	1	1	1	1	1	0	0	0	1	1	1	0	0	0	1	1	1	1	1	1
PROF2_HUMAN	Profilin-2 OS=Homo sapiens GN=PFN2 PE=1 SV=3	3.422	0.7323	0.033192	4	3	3	4	3	3	7	6	6	5	3	3	5	3	3	5	4	4	4	1	1	4	3	3	4	3	3	5	4	4	2	2	2	4	3	3	4	3	3	2	2	2	3	3	3
TBB4A_HUMAN	Tubulin beta-4A chain OS=Homo sapiens GN=TUBB4A PE=1 SV=2	3.788	0.7512	0.001544	38	13	0	50	11	0	48	18	0	34	11	0	21	6	0	26	9	0	17	4	0	21	6	0	30	12	0	31	6	0	15	5	0	22	8	0	32	9	0	21	4	0	18	4	0
IGF1R_HUMAN	Insulin-like growth factor 1 receptor OS=Homo sapiens GN=IGF1R PE=1 SV=1	1.551	0.5384	0.063228	1	1	1	0	0	0	0	0	0	0	0	0	0	0	0	0	0	0	0	0	0	0	0	0	0	0	0	0	0	0	0	0	0	0	0	0	0	0	0	0	0	0	0	0	0
TF2H2_HUMAN	General transcription factor IIH subunit 2 OS=Homo sapiens GN=GTF2H2 PE=1 SV=1	1.423	0.3935	0.460829	0	0	0	0	0	0	0	0	0	0	0	0	0	0	0	0	0	0	0	0	0	0	0	0	0	0	0	0	0	0	0	0	0	0	0	0	1	1	0	0	0	0	0	0	0
PHB2_HUMAN	Prohibitin-2 OS=Homo sapiens GN=PHB2 PE=1 SV=2	2.561	0.6335	0.05069	8	8	8	5	5	5	9	9	9	6	6	6	4	4	4	8	8	8	4	4	4	4	4	4	4	4	4	4	4	4	2	2	2	1	1	1	7	7	7	2	2	2	2	2	2
AK1C2_HUMAN	Aldo-keto reductase family 1 member C2 OS=Homo sapiens GN=AKR1C2 PE=1 SV=3	2.311	0.5306	0.309381	2	2	0	0	0	0	2	2	0	1	1	0	0	0	0	1	1	0	0	0	0	0	0	0	1	1	0	0	0	0	0	0	0	0	0	0	0	0	0	0	0	0	0	0	0
MYL1_HUMAN	Myosin light chain 1/3, skeletal muscle isoform OS=Homo sapiens GN=MYL1 PE=1 SV=3	1.94	0.5139	0.314008	1	1	0	0	0	0	0	0	0	0	0	0	0	0	0	0	0	0	0	0	0	0	0	0	0	0	0	0	0	0	0	0	0	0	0	0	0	0	0	0	0	0	0	0	0
DDX3Y_HUMAN	ATP-dependent RNA helicase DDX3Y OS=Homo sapiens GN=DDX3Y PE=1 SV=2	3.076	0.7191	0.032353	6	6	0	7	7	0	11	11	0	8	7	0	5	5	0	10	9	0	1	1	0	3	3	0	12	11	0	5	4	0	2	2	0	8	8	0	3	3	0	1	1	0	4	4	0
MPRI_HUMAN	Cation-independent mannose-6-phosphate receptor OS=Homo sapiens GN=IGF2R PE=1 SV=3	1.699	0.5603	0.160736	0	0	0	0	0	0	2	2	2	0	0	0	0	0	0	0	0	0	0	0	0	0	0	0	0	0	0	0	0	0	0	0	0	0	0	0	0	0	0	0	0	0	0	0	0
PSB2_HUMAN	Proteasome subunit beta type-2 OS=Homo sapiens GN=PSMB2 PE=1 SV=1	2.551	0.7347	0.019859	4	3	3	1	1	1	1	1	1	1	1	1	0	0	0	1	1	1	0	0	0	0	0	0	1	1	1	0	0	0	1	1	1	1	1	1	1	1	1	1	1	1	1	1	1
MYD88_HUMAN	Myeloid differentiation primary response protein MyD88 OS=Homo sapiens GN=MYD88 PE=1 SV=1	1.137	0.3448	0.826442	0	0	0	0	0	0	0	0	0	0	0	0	0	0	0	0	0	0	0	0	0	0	0	0	0	0	0	0	0	0	0	0	0	0	0	0	1	1	1	0	0	0	0	0	0
CWC15_HUMAN	Spliceosome-associated protein CWC15 homolog OS=Homo sapiens GN=CWC15 PE=1 SV=2	1.983	0.6268	0.467477	0	0	0	0	0	0	0	0	0	0	0	0	0	0	0	1	1	1	0	0	0	0	0	0	0	0	0	0	0	0	0	0	0	0	0	0	0	0	0	0	0	0	0	0	0
TBB5_HUMAN	Tubulin beta chain OS=Homo sapiens GN=TUBB PE=1 SV=2	4.334	0.7652	0.00026	53	18	2	71	17	2	66	23	3	50	17	2	35	12	2	40	15	2	33	10	2	33	12	2	43	15	2	43	11	2	24	11	2	37	12	2	49	14	2	27	9	2	30	10	2
CMC2_HUMAN	Calcium-binding mitochondrial carrier protein Aralar2 OS=Homo sapiens GN=SLC25A13 PE=1 SV=2	1.558	0.4037	0.007659	1	1	0	1	1	0	0	0	0	0	0	0	0	0	0	0	0	0	0	0	0	0	0	0	0	0	0	0	0	0	0	0	0	0	0	0	0	0	0	0	0	0	0	0	0
CDD_HUMAN	Cytidine deaminase OS=Homo sapiens GN=CDA PE=1 SV=2	2.368	0.6089	0.011421	3	2	2	2	2	2	2	2	2	3	2	2	2	2	2	2	2	2	1	1	1	1	1	1	2	2	2	1	1	1	1	1	1	2	2	2	3	2	2	1	1	1	1	1	1
PRDX2_HUMAN	Peroxiredoxin-2 OS=Homo sapiens GN=PRDX2 PE=1 SV=5	2.495	0.6184	0.006468	6	4	3	8	4	3	6	4	3	6	4	3	6	4	3	8	5	4	9	4	3	7	4	3	8	5	4	8	4	3	8	4	3	6	5	4	10	4	3	6	3	2	6	4	3
ALDH2_HUMAN	Aldehyde dehydrogenase, mitochondrial OS=Homo sapiens GN=ALDH2 PE=1 SV=2	1.997	0.7331	0.105117	1	1	1	0	0	0	0	0	0	2	2	2	0	0	0	1	1	1	0	0	0	0	0	0	0	0	0	0	0	0	0	0	0	0	0	0	0	0	0	0	0	0	0	0	0
SPS2L_HUMAN	SPATS2-like protein OS=Homo sapiens GN=SPATS2L PE=1 SV=2	2.26	0.5106	0.476922	0	0	0	0	0	0	1	1	1	0	0	0	0	0	0	0	0	0	0	0	0	0	0	0	0	0	0	0	0	0	0	0	0	0	0	0	0	0	0	0	0	0	0	0	0
MYH10_HUMAN	Myosin-10 OS=Homo sapiens GN=MYH10 PE=1 SV=3	2.708	0.6275	0.012466	8	7	0	2	2	0	6	5	0	7	5	0	3	3	0	5	5	0	2	2	0	3	3	0	4	3	0	5	4	0	3	2	0	4	3	0	3	2	0	2	2	0	4	3	0
PGK2_HUMAN	Phosphoglycerate kinase 2 OS=Homo sapiens GN=PGK2 PE=1 SV=3	3.912	0.753	0.005572	8	6	0	1	1	0	6	4	0	6	5	0	3	2	0	5	4	0	3	2	0	3	3	0	5	4	0	7	5	0	1	1	0	3	3	0	9	5	0	3	2	0	3	2	0
SUCB2_HUMAN	Succinyl-CoA ligase [GDP-forming] subunit beta, mitochondrial OS=Homo sapiens GN=SUCLG2 PE=1 SV=2	1.198	0.4741	0.639436	0	0	0	0	0	0	0	0	0	0	0	0	0	0	0	1	1	1	0	0	0	0	0	0	0	0	0	0	0	0	0	0	0	0	0	0	0	0	0	0	0	0	0	0	0
CBPA3_HUMAN	Mast cell carboxypeptidase A OS=Homo sapiens GN=CPA3 PE=1 SV=2	1.156	0.1306	0.729817	0	0	0	0	0	0	0	0	0	0	0	0	0	0	0	0	0	0	0	0	0	0	0	0	0	0	0	0	0	0	0	0	0	0	0	0	0	0	0	0	0	0	0	0	0
KT3K_HUMAN	Ketosamine-3-kinase OS=Homo sapiens GN=FN3KRP PE=1 SV=2	4.143	0.6155	0.014728	8	6	6	4	4	4	6	5	5	7	5	5	3	3	3	3	3	3	3	2	2	2	2	2	3	3	3	3	3	3	2	2	2	4	4	4	2	2	2	3	3	3	3	2	2
LV209_HUMAN	Ig lambda chain V-II region WIN OS=Homo sapiens PE=1 SV=1	1.952	0.3827	0.135397	0	0	0	1	1	0	0	0	0	0	0	0	0	0	0	0	0	0	0	0	0	0	0	0	0	0	0	0	0	0	0	0	0	0	0	0	0	0	0	0	0	0	0	0	0
CAN1_HUMAN	Calpain-1 catalytic subunit OS=Homo sapiens GN=CAPN1 PE=1 SV=1	1.875	0.5473	0.120767	0	0	0	0	0	0	0	0	0	1	1	1	0	0	0	0	0	0	0	0	0	0	0	0	1	1	1	0	0	0	0	0	0	0	0	0	1	1	1	1	1	1	1	1	1
UBE4B_HUMAN	Ubiquitin conjugation factor E4 B OS=Homo sapiens GN=UBE4B PE=1 SV=1	1.163	0.19	1.08802	0	0	0	0	0	0	0	0	0	0	0	0	0	0	0	0	0	0	0	0	0	1	1	0	0	0	0	0	0	0	0	0	0	0	0	0	0	0	0	0	0	0	0	0	0
RRP15_HUMAN	RRP15-like protein OS=Homo sapiens GN=RRP15 PE=1 SV=2	2.682	0.8056	0.37965	0	0	0	0	0	0	0	0	0	1	1	1	0	0	0	1	1	1	1	1	1	0	0	0	1	1	1	1	1	1	0	0	0	1	1	1	1	1	1	0	0	0	0	0	0
KI20A_HUMAN	Kinesin-like protein KIF20A OS=Homo sapiens GN=KIF20A PE=1 SV=1	2.39	0.5121	0.047377	1	1	1	0	0	0	0	0	0	1	1	1	0	0	0	0	0	0	0	0	0	0	0	0	1	1	1	0	0	0	0	0	0	0	0	0	0	0	0	0	0	0	0	0	0
MAGC1_HUMAN	Melanoma-associated antigen C1 OS=Homo sapiens GN=MAGEC1 PE=1 SV=3	1.594	0.4737	0.583009	1	1	0	0	0	0	0	0	0	0	0	0	0	0	0	0	0	0	0	0	0	0	0	0	0	0	0	0	0	0	0	0	0	0	0	0	0	0	0	0	0	0	0	0	0
PACN3_HUMAN	Protein kinase C and casein kinase substrate in neurons protein 3 OS=Homo sapiens GN=PACSIN3 PE=1 SV=2	1.615	0.4062	0.173924	0	0	0	0	0	0	0	0	0	0	0	0	0	0	0	1	1	1	0	0	0	0	0	0	0	0	0	0	0	0	0	0	0	0	0	0	1	1	1	0	0	0	0	0	0
LUC7L_HUMAN	Putative RNA-binding protein Luc7-like 1 OS=Homo sapiens GN=LUC7L PE=1 SV=1	1.653	0.5656	0.600908	0	0	0	1	1	0	0	0	0	0	0	0	0	0	0	0	0	0	0	0	0	0	0	0	0	0	0	0	0	0	0	0	0	0	0	0	0	0	0	0	0	0	0	0	0
KCC2A_HUMAN	Calcium/calmodulin-dependent protein kinase type II subunit alpha OS=Homo sapiens GN=CAMK2A PE=1 SV=2	1.597	0.4389	0.629023	1	1	0	0	0	0	0	0	0	0	0	0	0	0	0	0	0	0	0	0	0	0	0	0	0	0	0	0	0	0	0	0	0	0	0	0	0	0	0	0	0	0	0	0	0
RS27A_HUMAN	Ubiquitin-40S ribosomal protein S27a OS=Homo sapiens GN=RPS27A PE=1 SV=2	4.04	0.7404	0.000596	51	8	0	77	7	0	61	8	0	22	8	0	21	7	0	30	8	0	21	5	0	17	6	0	32	8	0	16	6	0	13	6	0	20	6	0	21	7	0	9	4	0	16	7	0
UBB_HUMAN	Polyubiquitin-B OS=Homo sapiens GN=UBB PE=1 SV=1	4.04	0.7404	0.000596	51	8	0	77	7	0	61	8	0	22	8	0	21	7	0	30	8	0	21	5	0	17	6	0	32	8	0	16	6	0	13	6	0	20	6	0	21	7	0	9	4	0	16	7	0
UBC_HUMAN	Polyubiquitin-C OS=Homo sapiens GN=UBC PE=1 SV=3	4.04	0.7404	0.000596	51	8	0	77	7	0	61	8	0	22	8	0	21	7	0	30	8	0	21	5	0	17	6	0	32	8	0	16	6	0	13	6	0	20	6	0	21	7	0	9	4	0	16	7	0
RL40_HUMAN	Ubiquitin-60S ribosomal protein L40 OS=Homo sapiens GN=UBA52 PE=1 SV=2	4.04	0.7404	0.000596	51	8	0	77	7	0	61	8	0	22	8	0	21	7	0	30	8	0	21	5	0	17	6	0	32	8	0	16	6	0	13	6	0	20	6	0	21	7	0	9	4	0	16	7	0
H2A2B_HUMAN	Histone H2A type 2-B OS=Homo sapiens GN=HIST2H2AB PE=1 SV=3	2.554	0.5009	0.003833	3	2	0	4	2	0	2	1	0	11	3	0	10	3	0	6	2	0	18	3	0	11	3	0	11	4	1	8	3	0	1	1	0	10	2	0	9	3	0	5	2	0	7	2	0
GOGA2_HUMAN	Golgin subfamily A member 2 OS=Homo sapiens GN=GOLGA2 PE=1 SV=3	1.698	0.47	0.112436	0	0	0	0	0	0	0	0	0	0	0	0	0	0	0	1	1	1	0	0	0	0	0	0	1	1	1	0	0	0	0	0	0	0	0	0	0	0	0	0	0	0	0	0	0
LASP1_HUMAN	LIM and SH3 domain protein 1 OS=Homo sapiens GN=LASP1 PE=1 SV=2	2.734	0.683	0.000316	7	7	7	2	2	2	6	6	6	6	6	6	4	4	4	7	7	7	2	2	2	3	3	3	5	5	5	4	4	4	2	2	2	5	5	5	5	5	5	3	3	3	4	4	4
PSB5_HUMAN	Proteasome subunit beta type-5 OS=Homo sapiens GN=PSMB5 PE=1 SV=3	3.723	0.7756	0.001581	9	7	7	6	5	5	6	5	5	8	7	7	5	5	5	7	6	6	0	0	0	4	4	4	9	7	7	4	3	3	3	3	3	6	6	6	5	4	4	3	3	3	5	5	5
TKT_HUMAN	Transketolase OS=Homo sapiens GN=TKT PE=1 SV=3	4.428	0.7598	0.001719	31	23	23	17	16	16	35	22	22	32	20	20	21	14	14	27	18	18	19	11	11	20	10	10	25	16	16	32	18	18	13	11	11	24	15	15	31	19	19	18	11	11	25	13	13
RAB6C_HUMAN	Ras-related protein Rab-6C OS=Homo sapiens GN=RAB6C PE=1 SV=2	1.413	0.3658	1.10701	0	0	0	0	0	0	1	1	0	0	0	0	0	0	0	1	1	0	0	0	0	0	0	0	0	0	0	0	0	0	0	0	0	0	0	0	1	1	0	0	0	0	0	0	0
PLST_HUMAN	Plastin-3 OS=Homo sapiens GN=PLS3 PE=1 SV=4	3.648	0.7111	0.008464	4	4	2	0	0	0	0	0	0	0	0	0	0	0	0	0	0	0	1	1	1	1	1	1	0	0	0	2	2	2	1	1	1	0	0	0	3	3	3	0	0	0	2	2	2
PPBN_HUMAN	Alkaline phosphatase, placental-like OS=Homo sapiens GN=ALPPL2 PE=1 SV=4	3.075	0.68	0.099857	1	1	0	0	0	0	1	1	0	1	1	0	0	0	0	1	1	0	0	0	0	1	1	0	1	1	0	0	0	0	0	0	0	0	0	0	1	1	0	1	1	0	1	1	0
S26A9_HUMAN	Solute carrier family 26 member 9 OS=Homo sapiens GN=SLC26A9 PE=1 SV=1	1.07	0.3065	1.96104	0	0	0	0	0	0	0	0	0	0	0	0	0	0	0	0	0	0	0	0	0	0	0	0	0	0	0	0	0	0	0	0	0	0	0	0	0	0	0	0	0	0	1	1	1
EI2BA_HUMAN	Translation initiation factor eIF-2B subunit alpha OS=Homo sapiens GN=EIF2B1 PE=1 SV=1	1.211	0.1718	0.811946	0	0	0	0	0	0	0	0	0	0	0	0	0	0	0	0	0	0	0	0	0	0	0	0	0	0	0	0	0	0	0	0	0	0	0	0	0	0	0	0	0	0	0	0	0
B2MG_HUMAN	Beta-2-microglobulin OS=Homo sapiens GN=B2M PE=1 SV=1	1.77	0.3927	0.068251	0	0	0	0	0	0	1	1	1	1	1	1	1	1	1	2	2	2	0	0	0	0	0	0	1	1	1	1	1	1	0	0	0	0	0	0	2	2	2	0	0	0	0	0	0
ANLN_HUMAN	Actin-binding protein anillin OS=Homo sapiens GN=ANLN PE=1 SV=2	2.99	0.6293	0.016644	9	9	9	7	7	7	8	8	8	10	10	10	3	3	3	7	7	7	4	4	4	6	6	6	11	11	11	6	6	6	4	4	4	9	9	9	8	8	8	4	4	4	8	8	8
P66A_HUMAN	Transcriptional repressor p66-alpha OS=Homo sapiens GN=GATAD2A PE=1 SV=1	2.572	0.6485	0.024335	1	1	0	0	0	0	1	1	0	2	2	1	1	1	0	1	1	0	0	0	0	1	1	0	1	1	0	1	1	0	1	1	0	1	1	0	1	1	0	0	0	0	0	0	0
H2A1A_HUMAN	Histone H2A type 1-A OS=Homo sapiens GN=HIST1H2AA PE=1 SV=3	2.554	0.5009	0.003833	4	3	0	5	3	0	3	2	0	13	4	0	11	4	0	7	3	0	18	3	0	11	3	0	11	4	0	8	3	0	1	1	0	11	3	0	10	4	0	5	2	0	7	2	0
H2A1C_HUMAN	Histone H2A type 1-C OS=Homo sapiens GN=HIST1H2AC PE=1 SV=3	2.554	0.5009	0.003833	4	3	0	5	3	0	3	2	0	13	4	0	11	4	0	7	3	0	18	3	0	11	3	0	11	4	0	8	3	0	1	1	0	11	3	0	10	4	0	5	2	0	7	2	0
H2A1H_HUMAN	Histone H2A type 1-H OS=Homo sapiens GN=HIST1H2AH PE=1 SV=3	2.554	0.6141	0.003833	4	3	0	5	3	0	3	2	0	13	4	0	11	4	0	7	3	0	18	3	0	11	3	0	12	5	0	8	3	0	1	1	0	11	3	0	10	4	0	5	2	0	7	2	0
H2A1J_HUMAN	Histone H2A type 1-J OS=Homo sapiens GN=HIST1H2AJ PE=1 SV=3	2.554	0.6141	0.003833	4	3	0	5	3	0	3	2	0	13	4	0	11	4	0	7	3	0	18	3	0	11	3	0	12	5	0	8	3	0	1	1	0	11	3	0	10	4	0	5	2	0	7	2	0
H2A1_HUMAN	Histone H2A type 1 OS=Homo sapiens GN=HIST1H2AG PE=1 SV=2	2.554	0.6141	0.003833	4	3	0	5	3	0	3	2	0	13	4	0	11	4	0	7	3	0	18	3	0	11	3	0	12	5	0	8	3	0	1	1	0	11	3	0	10	4	0	5	2	0	7	2	0
H2A2A_HUMAN	Histone H2A type 2-A OS=Homo sapiens GN=HIST2H2AA3 PE=1 SV=3	2.554	0.6141	0.003833	4	3	0	5	3	0	3	2	0	13	4	0	11	4	0	7	3	0	18	3	0	11	3	0	12	5	0	8	3	0	1	1	0	11	3	0	10	4	0	5	2	0	7	2	0
H2A2C_HUMAN	Histone H2A type 2-C OS=Homo sapiens GN=HIST2H2AC PE=1 SV=4	2.554	0.6141	0.003833	4	3	0	5	3	0	3	2	0	13	4	0	11	4	0	7	3	0	18	3	0	11	3	0	12	5	0	8	3	0	1	1	0	11	3	0	10	4	0	5	2	0	7	2	0
H2AJ_HUMAN	Histone H2A.J OS=Homo sapiens GN=H2AFJ PE=1 SV=1	2.554	0.6141	0.003833	4	3	0	5	3	0	3	2	0	13	4	0	11	4	0	7	3	0	18	3	0	11	3	0	12	5	0	8	3	0	1	1	0	11	3	0	10	4	0	5	2	0	7	2	0
TIF1B_HUMAN	Transcription intermediary factor 1-beta OS=Homo sapiens GN=TRIM28 PE=1 SV=5	3.2	0.7373	0.007677	18	17	17	8	8	8	13	13	13	11	11	11	7	7	7	10	10	10	7	7	7	6	6	6	12	11	11	8	7	7	4	4	4	7	7	7	10	8	8	6	6	6	5	5	5
RL17_HUMAN	60S ribosomal protein L17 OS=Homo sapiens GN=RPL17 PE=1 SV=3	2.893	0.6854	0.013218	4	3	3	4	3	3	3	3	3	7	4	4	5	3	3	6	4	4	1	1	1	5	4	4	6	4	4	6	4	4	1	1	1	6	5	5	5	3	3	1	1	1	4	3	3
NCLN_HUMAN	Nicalin OS=Homo sapiens GN=NCLN PE=1 SV=2	1.551	0.381	1.42213	0	0	0	0	0	0	0	0	0	0	0	0	0	0	0	0	0	0	0	0	0	0	0	0	0	0	0	0	0	0	0	0	0	0	0	0	0	0	0	0	0	0	0	0	0
DEOC_HUMAN	Putative deoxyribose-phosphate aldolase OS=Homo sapiens GN=DERA PE=1 SV=2	2.58	0.5802	0.16269	1	1	1	0	0	0	1	1	1	0	0	0	0	0	0	0	0	0	0	0	0	0	0	0	0	0	0	0	0	0	0	0	0	0	0	0	0	0	0	0	0	0	0	0	0
UGPA_HUMAN	UTP--glucose-1-phosphate uridylyltransferase OS=Homo sapiens GN=UGP2 PE=1 SV=5	2.132	0.4953	0.061337	0	0	0	0	0	0	1	1	1	3	3	3	1	1	1	2	2	2	0	0	0	0	0	0	2	2	2	0	0	0	1	1	1	0	0	0	2	2	2	1	1	1	1	1	1
TCPQ_HUMAN	T-complex protein 1 subunit theta OS=Homo sapiens GN=CCT8 PE=1 SV=4	3.396	0.7373	0.006623	32	27	27	13	13	13	25	22	22	25	22	22	21	18	18	22	19	19	10	9	9	10	10	10	18	17	17	14	12	12	10	10	10	16	13	13	24	20	20	6	6	6	13	11	11
SAP18_HUMAN	Histone deacetylase complex subunit SAP18 OS=Homo sapiens GN=SAP18 PE=1 SV=1	3.024	0.6455	0.066727	3	3	3	2	2	2	2	2	2	4	4	4	2	2	2	4	4	4	3	3	3	4	4	4	2	2	2	3	3	3	3	3	3	3	3	3	4	4	4	2	2	2	2	2	2
DRGX_HUMAN	Dorsal root ganglia homeobox protein OS=Homo sapiens GN=DRGX PE=2 SV=1	1.172	0.1783	0.323414	0	0	0	0	0	0	0	0	0	0	0	0	0	0	0	0	0	0	1	1	1	0	0	0	0	0	0	0	0	0	0	0	0	0	0	0	0	0	0	0	0	0	0	0	0
6PGD_HUMAN	6-phosphogluconate dehydrogenase, decarboxylating OS=Homo sapiens GN=PGD PE=1 SV=3	2.742	0.7768	0.020782	5	5	5	0	0	0	4	4	4	6	5	5	3	3	3	5	5	5	1	1	1	3	3	3	5	5	5	2	2	2	1	1	1	1	1	1	6	5	5	2	2	2	2	2	2
AATM_HUMAN	Aspartate aminotransferase, mitochondrial OS=Homo sapiens GN=GOT2 PE=1 SV=3	3.201	0.6279	0.006011	2	2	2	0	0	0	3	3	3	4	4	4	2	2	2	6	6	6	1	1	1	2	2	2	2	2	2	1	1	1	1	1	1	2	2	2	3	3	3	2	2	2	2	2	2
RB11A_HUMAN	Ras-related protein Rab-11A OS=Homo sapiens GN=RAB11A PE=1 SV=3	2.56	0.5821	0.015989	3	3	0	1	1	0	2	2	0	2	2	0	2	2	0	3	3	0	1	1	0	1	1	0	1	1	0	0	0	0	0	0	0	1	1	0	4	4	0	1	1	0	2	2	0
GRP75_HUMAN	Stress-70 protein, mitochondrial OS=Homo sapiens GN=HSPA9 PE=1 SV=2	5.874	0.7706	0.002637	67	45	44	46	35	34	68	45	44	42	28	27	37	28	27	45	34	33	29	23	22	37	25	24	41	30	29	41	27	26	23	20	19	41	30	29	47	32	31	31	25	24	39	28	27
TBCB_HUMAN	Tubulin-folding cofactor B OS=Homo sapiens GN=TBCB PE=1 SV=2	2.521	0.7027	0.030521	2	2	2	0	0	0	3	3	3	5	5	5	4	4	4	4	4	4	2	2	2	2	2	2	3	3	3	1	1	1	1	1	1	3	3	3	5	5	5	2	2	2	3	3	3
CHD2_HUMAN	Chromodomain-helicase-DNA-binding protein 2 OS=Homo sapiens GN=CHD2 PE=1 SV=2	1.17	0.4616	0.102038	0	0	0	1	1	0	1	1	0	0	0	0	0	0	0	0	0	0	0	0	0	0	0	0	0	0	0	1	1	0	1	1	0	0	0	0	0	0	0	0	0	0	2	1	0
ROAA_HUMAN	Heterogeneous nuclear ribonucleoprotein A/B OS=Homo sapiens GN=HNRNPAB PE=1 SV=2	2.542	0.7459	0.095767	4	4	3	3	3	2	1	1	1	3	3	3	2	2	2	1	1	1	2	2	2	1	1	1	3	3	2	2	2	2	2	2	2	2	2	1	4	4	3	2	2	1	3	3	2
HNRL2_HUMAN	Heterogeneous nuclear ribonucleoprotein U-like protein 2 OS=Homo sapiens GN=HNRNPUL2 PE=1 SV=1	2.986	0.7821	0.014114	12	12	12	4	4	4	10	10	10	10	10	10	10	10	10	13	12	12	3	3	3	6	6	6	8	8	8	7	7	7	5	5	5	7	7	7	6	6	6	4	4	4	9	9	9
PAF1_HUMAN	RNA polymerase II-associated factor 1 homolog OS=Homo sapiens GN=PAF1 PE=1 SV=2	1.98	0.5157	0.019892	1	1	1	0	0	0	1	1	1	0	0	0	0	0	0	1	1	1	0	0	0	0	0	0	2	2	2	0	0	0	0	0	0	1	1	1	0	0	0	0	0	0	1	1	1
S61A1_HUMAN	Protein transport protein Sec61 subunit alpha isoform 1 OS=Homo sapiens GN=SEC61A1 PE=1 SV=2	2.184	0.5022	0.024005	0	0	0	1	1	1	2	2	1	2	2	1	0	0	0	2	2	1	0	0	0	0	0	0	1	1	0	0	0	0	0	0	0	0	0	0	2	2	2	0	0	0	0	0	0
TRI25_HUMAN	E3 ubiquitin/ISG15 ligase TRIM25 OS=Homo sapiens GN=TRIM25 PE=1 SV=2	2.046	0.5827	0.113756	1	1	1	0	0	0	2	2	2	0	0	0	1	1	1	0	0	0	1	1	1	1	1	1	0	0	0	0	0	0	0	0	0	1	1	1	0	0	0	0	0	0	0	0	0
ANTR1_HUMAN	Anthrax toxin receptor 1 OS=Homo sapiens GN=ANTXR1 PE=1 SV=2	1.65	0.5855	0.723772	1	1	1	0	0	0	1	1	1	0	0	0	0	0	0	0	0	0	0	0	0	0	0	0	0	0	0	0	0	0	0	0	0	0	0	0	0	0	0	0	0	0	0	0	0
RABX5_HUMAN	Rab5 GDP/GTP exchange factor OS=Homo sapiens GN=RABGEF1 PE=1 SV=2	1.504	0.1915	0.613124	0	0	0	0	0	0	0	0	0	0	0	0	0	0	0	0	0	0	0	0	0	0	0	0	0	0	0	0	0	0	0	0	0	0	0	0	0	0	0	0	0	0	0	0	0
ANX13_HUMAN	Annexin A13 OS=Homo sapiens GN=ANXA13 PE=1 SV=3	1.679	0.4544	0.320264	0	0	0	0	0	0	1	1	0	0	0	0	0	0	0	0	0	0	0	0	0	0	0	0	1	1	0	0	0	0	0	0	0	0	0	0	0	0	0	0	0	0	0	0	0
SC16A_HUMAN	Protein transport protein Sec16A OS=Homo sapiens GN=SEC16A PE=1 SV=3	2.276	0.7121	0.082871	4	4	4	3	3	3	8	8	8	2	2	2	2	2	2	2	2	2	0	0	0	0	0	0	1	1	1	0	0	0	1	1	1	2	2	2	1	1	1	2	2	2	1	1	1
PLAK_HUMAN	Junction plakoglobin OS=Homo sapiens GN=JUP PE=1 SV=3	2.98	0.7014	0.003385	8	8	8	2	2	2	6	6	6	9	8	8	10	9	8	13	13	12	3	3	3	3	3	3	6	6	6	2	2	2	5	5	5	12	11	10	6	6	6	0	0	0	2	2	2
TALDO_HUMAN	Transaldolase OS=Homo sapiens GN=TALDO1 PE=1 SV=2	3	0.6553	0.018036	8	8	8	2	2	2	4	4	4	8	8	8	5	5	5	6	6	6	1	1	1	4	4	4	4	4	4	5	5	5	2	2	2	4	4	4	7	7	7	4	4	4	3	3	3
TOM34_HUMAN	Mitochondrial import receptor subunit TOM34 OS=Homo sapiens GN=TOMM34 PE=1 SV=2	2.008	0.5267	0.343988	1	1	1	0	0	0	0	0	0	0	0	0	0	0	0	0	0	0	0	0	0	0	0	0	0	0	0	1	1	1	0	0	0	0	0	0	2	2	2	0	0	0	0	0	0
SERPH_HUMAN	Serpin H1 OS=Homo sapiens GN=SERPINH1 PE=1 SV=2	3.932	0.6982	0.005598	12	12	12	4	4	4	10	10	10	13	9	9	5	5	5	10	10	10	3	3	3	4	4	4	7	7	7	3	3	3	2	2	2	7	6	6	10	9	9	3	3	3	4	4	4
CRK_HUMAN	Adapter molecule crk OS=Homo sapiens GN=CRK PE=1 SV=2	1.919	0.1652	0.122556	0	0	0	0	0	0	0	0	0	0	0	0	0	0	0	0	0	0	0	0	0	0	0	0	0	0	0	0	0	0	0	0	0	0	0	0	0	0	0	0	0	0	0	0	0
PSA7_HUMAN	Proteasome subunit alpha type-7 OS=Homo sapiens GN=PSMA7 PE=1 SV=1	3.307	0.8146	0.009857	10	10	7	7	7	4	11	9	5	6	6	6	2	2	2	6	6	5	1	1	1	2	2	2	3	3	3	1	1	1	2	2	2	3	3	3	6	6	6	2	2	2	1	1	1
CE350_HUMAN	Centrosome-associated protein 350 OS=Homo sapiens GN=CEP350 PE=1 SV=1	1.893	0.2627	0.321798	0	0	0	0	0	0	0	0	0	0	0	0	0	0	0	0	0	0	0	0	0	0	0	0	0	0	0	1	1	1	0	0	0	0	0	0	1	1	1	0	0	0	0	0	0
NCOAT_HUMAN	Bifunctional protein NCOAT OS=Homo sapiens GN=MGEA5 PE=1 SV=2	1.016	0.2687	1.50393	0	0	0	0	0	0	0	0	0	0	0	0	0	0	0	1	1	1	0	0	0	0	0	0	0	0	0	0	0	0	0	0	0	0	0	0	0	0	0	0	0	0	0	0	0
CAZA2_HUMAN	F-actin-capping protein subunit alpha-2 OS=Homo sapiens GN=CAPZA2 PE=1 SV=3	1.892	0.4943	0.022861	2	2	1	0	0	0	2	2	0	2	2	0	1	1	0	1	1	0	0	0	0	0	0	0	1	1	0	1	1	0	0	0	0	0	0	0	1	1	0	0	0	0	1	1	1
ESYT1_HUMAN	Extended synaptotagmin-1 OS=Homo sapiens GN=ESYT1 PE=1 SV=1	1.834	0.4711	0.878214	1	1	1	0	0	0	0	0	0	0	0	0	0	0	0	0	0	0	0	0	0	0	0	0	1	1	1	0	0	0	0	0	0	0	0	0	0	0	0	0	0	0	1	1	1
CHMP5_HUMAN	Charged multivesicular body protein 5 OS=Homo sapiens GN=CHMP5 PE=1 SV=1	1.956	0.2541	0.985934	1	1	1	0	0	0	0	0	0	0	0	0	0	0	0	0	0	0	0	0	0	0	0	0	0	0	0	0	0	0	0	0	0	0	0	0	2	1	1	0	0	0	0	0	0
HS90A_HUMAN	Heat shock protein HSP 90-alpha OS=Homo sapiens GN=HSP90AA1 PE=1 SV=5	4.023	0.8185	0.000315	54	32	15	33	22	9	58	37	17	66	31	13	49	26	12	58	31	13	47	14	5	43	19	9	47	24	11	53	23	10	25	22	10	48	25	9	65	26	12	34	19	9	40	19	8
ACSL3_HUMAN	Long-chain-fatty-acid--CoA ligase 3 OS=Homo sapiens GN=ACSL3 PE=1 SV=3	1.854	0.6859	0.05508	3	3	3	1	1	1	0	0	0	4	4	4	2	2	2	1	1	1	0	0	0	0	0	0	1	1	1	0	0	0	0	0	0	0	0	0	3	2	2	0	0	0	0	0	0
AT2A3_HUMAN	Sarcoplasmic/endoplasmic reticulum calcium ATPase 3 OS=Homo sapiens GN=ATP2A3 PE=1 SV=2	1.429	0.5763	0.044451	1	1	0	0	0	0	1	1	0	0	0	0	1	1	0	0	0	0	1	1	0	1	1	0	2	2	0	0	0	0	0	0	0	1	1	0	0	0	0	1	1	0	1	1	0
FMR1_HUMAN	Fragile X mental retardation protein 1 OS=Homo sapiens GN=FMR1 PE=1 SV=1	1.717	0.2844	0.192577	0	0	0	0	0	0	1	1	0	1	1	0	0	0	0	0	0	0	0	0	0	0	0	0	0	0	0	0	0	0	0	0	0	0	0	0	0	0	0	0	0	0	0	0	0
K1C23_HUMAN	Keratin, type I cytoskeletal 23 OS=Homo sapiens GN=KRT23 PE=1 SV=2	2.678	0.6624	0.001502	2	2	0	2	2	0	2	2	0	2	2	0	2	2	0	2	2	0	2	2	0	1	1	0	2	2	0	2	2	0	2	2	0	2	2	0	2	2	0	1	1	0	1	1	0
SBP1_HUMAN	Selenium-binding protein 1 OS=Homo sapiens GN=SELENBP1 PE=1 SV=2	1.6	0.3481	0.137556	1	1	1	0	0	0	0	0	0	0	0	0	0	0	0	0	0	0	0	0	0	0	0	0	0	0	0	0	0	0	0	0	0	0	0	0	0	0	0	0	0	0	0	0	0
DDX21_HUMAN	Nucleolar RNA helicase 2 OS=Homo sapiens GN=DDX21 PE=1 SV=5	2.989	0.7379	0.017428	4	4	4	5	5	5	2	2	2	9	9	8	7	6	6	7	7	7	0	0	0	3	3	3	11	11	10	5	5	5	0	0	0	5	5	5	4	4	4	0	0	0	0	0	0
VP26A_HUMAN	Vacuolar protein sorting-associated protein 26A OS=Homo sapiens GN=VPS26A PE=1 SV=2	1.666	0.6334	0.238773	3	3	2	0	0	0	1	1	1	1	1	0	0	0	0	0	0	0	0	0	0	0	0	0	0	0	0	0	0	0	0	0	0	0	0	0	1	1	0	0	0	0	0	0	0
MICA3_HUMAN	Protein-methionine sulfoxide oxidase MICAL3 OS=Homo sapiens GN=MICAL3 PE=1 SV=2	1.578	0.1736	0.814861	0	0	0	0	0	0	0	0	0	0	0	0	0	0	0	0	0	0	0	0	0	0	0	0	0	0	0	0	0	0	0	0	0	0	0	0	1	1	1	0	0	0	0	0	0
ROA3_HUMAN	Heterogeneous nuclear ribonucleoprotein A3 OS=Homo sapiens GN=HNRNPA3 PE=1 SV=2	3.538	0.8083	0.008492	5	5	5	4	4	4	8	7	7	5	5	5	6	5	5	6	5	5	2	2	2	3	3	3	6	4	4	3	3	3	3	3	3	4	4	4	5	4	4	3	3	3	4	3	3
H14_HUMAN	Histone H1.4 OS=Homo sapiens GN=HIST1H1E PE=1 SV=2	2.663	0.5274	0.0132	1	1	0	2	2	0	3	3	0	2	2	0	3	3	0	2	2	0	1	1	0	3	3	0	5	5	0	2	2	0	1	1	0	6	5	0	2	2	0	2	2	0	3	3	0
H12_HUMAN	Histone H1.2 OS=Homo sapiens GN=HIST1H1C PE=1 SV=2	2.663	0.5303	0.0132	1	1	0	2	2	0	3	3	0	2	2	0	3	3	0	2	2	0	2	2	1	4	4	1	6	6	1	2	2	0	1	1	0	7	6	1	2	2	0	2	2	0	4	4	1
H13_HUMAN	Histone H1.3 OS=Homo sapiens GN=HIST1H1D PE=1 SV=2	2.663	0.5274	0.0132	1	1	0	2	2	0	3	3	0	2	2	0	3	3	0	2	2	0	1	1	0	3	3	0	5	5	0	2	2	0	1	1	0	6	5	0	2	2	0	2	2	0	3	3	0
H11_HUMAN	Histone H1.1 OS=Homo sapiens GN=HIST1H1A PE=1 SV=3	2.663	0.5274	0.0132	1	1	0	2	2	0	2	2	0	1	1	0	2	2	0	1	1	0	1	1	0	2	2	0	3	3	0	2	2	0	1	1	0	3	3	0	2	2	0	2	2	0	2	2	0
HUTH_HUMAN	Histidine ammonia-lyase OS=Homo sapiens GN=HAL PE=1 SV=1	2.679	0.7322	0.024339	0	0	0	0	0	0	0	0	0	0	0	0	0	0	0	0	0	0	0	0	0	0	0	0	0	0	0	0	0	0	0	0	0	0	0	0	0	0	0	0	0	0	0	0	0
RL35A_HUMAN	60S ribosomal protein L35a OS=Homo sapiens GN=RPL35A PE=1 SV=2	2.652	0.705	0.002161	6	5	5	6	6	6	5	5	5	8	6	6	5	4	4	7	6	6	2	2	2	6	5	5	7	6	6	7	6	6	3	2	2	6	5	5	6	5	5	4	3	3	5	5	5
CC124_HUMAN	Coiled-coil domain-containing protein 124 OS=Homo sapiens GN=CCDC124 PE=1 SV=1	1.539	0.2157	0.408652	0	0	0	0	0	0	0	0	0	0	0	0	0	0	0	0	0	0	0	0	0	0	0	0	0	0	0	0	0	0	0	0	0	0	0	0	0	0	0	0	0	0	0	0	0
TXND5_HUMAN	Thioredoxin domain-containing protein 5 OS=Homo sapiens GN=TXNDC5 PE=1 SV=2	2.144	0.632	0.075016	2	2	2	1	1	1	4	4	4	1	1	1	2	2	2	4	4	4	0	0	0	0	0	0	2	2	2	0	0	0	0	0	0	3	3	3	3	3	3	1	1	1	0	0	0
QOR_HUMAN	Quinone oxidoreductase OS=Homo sapiens GN=CRYZ PE=1 SV=1	1.412	0.2677	0.270841	0	0	0	0	0	0	1	1	1	0	0	0	0	0	0	0	0	0	0	0	0	0	0	0	0	0	0	0	0	0	0	0	0	0	0	0	1	1	1	0	0	0	0	0	0
EXOS4_HUMAN	Exosome complex component RRP41 OS=Homo sapiens GN=EXOSC4 PE=1 SV=3	3.056	0.5535	0.397347	2	2	2	0	0	0	0	0	0	0	0	0	0	0	0	0	0	0	0	0	0	0	0	0	0	0	0	0	0	0	1	1	1	0	0	0	0	0	0	0	0	0	0	0	0
LIMA1_HUMAN	LIM domain and actin-binding protein 1 OS=Homo sapiens GN=LIMA1 PE=1 SV=1	2.822	0.7164	0.062729	2	2	2	1	1	1	1	1	1	2	2	2	0	0	0	0	0	0	1	1	1	2	2	2	10	9	9	0	0	0	1	1	1	1	1	1	0	0	0	0	0	0	2	2	2
K1C15_HUMAN	Keratin, type I cytoskeletal 15 OS=Homo sapiens GN=KRT15 PE=1 SV=3	3.117	0.6512	0.004186	11	5	0	14	7	0	13	7	0	25	9	0	24	9	0	21	8	0	65	8	0	31	10	0	15	5	0	19	4	0	28	9	0	23	7	0	12	5	0	20	6	0	18	4	0
CBX5_HUMAN	Chromobox protein homolog 5 OS=Homo sapiens GN=CBX5 PE=1 SV=1	2.528	0.6574	0.014714	1	1	1	0	0	0	0	0	0	3	3	3	1	1	1	2	2	2	1	1	1	3	3	3	3	3	3	0	0	0	0	0	0	3	3	3	1	1	1	0	0	0	0	0	0
IPYR_HUMAN	Inorganic pyrophosphatase OS=Homo sapiens GN=PPA1 PE=1 SV=2	2.641	0.658	0.010802	7	7	6	0	0	0	5	5	5	5	5	5	3	3	3	7	5	5	1	1	1	1	1	1	4	4	4	2	2	2	1	1	1	2	2	2	3	2	2	1	1	1	1	1	1
PCYOX_HUMAN	Prenylcysteine oxidase 1 OS=Homo sapiens GN=PCYOX1 PE=1 SV=3	1.77	0.4359	0.035302	1	1	1	0	0	0	1	1	1	1	1	1	0	0	0	1	1	1	0	0	0	0	0	0	0	0	0	0	0	0	0	0	0	0	0	0	1	1	1	0	0	0	0	0	0
UBR2_HUMAN	E3 ubiquitin-protein ligase UBR2 OS=Homo sapiens GN=UBR2 PE=1 SV=1	1.227	0.2273	0.661355	1	1	0	0	0	0	0	0	0	0	0	0	0	0	0	0	0	0	0	0	0	0	0	0	1	1	0	0	0	0	0	0	0	0	0	0	0	0	0	0	0	0	0	0	0
RPB2_HUMAN	DNA-directed RNA polymerase II subunit RPB2 OS=Homo sapiens GN=POLR2B PE=1 SV=1	1.823	0.328	0.446303	0	0	0	0	0	0	1	1	1	0	0	0	0	0	0	0	0	0	0	0	0	0	0	0	0	0	0	0	0	0	0	0	0	0	0	0	0	0	0	0	0	0	0	0	0
SRP19_HUMAN	Signal recognition particle 19 kDa protein OS=Homo sapiens GN=SRP19 PE=1 SV=3	1.867	0.7472	0.046914	0	0	0	0	0	0	0	0	0	1	1	1	0	0	0	1	1	1	0	0	0	0	0	0	1	1	1	0	0	0	0	0	0	0	0	0	1	1	1	0	0	0	0	0	0
DIP2A_HUMAN	Disco-interacting protein 2 homolog A OS=Homo sapiens GN=DIP2A PE=1 SV=2	2.034	0.4374	0.033732	0	0	0	0	0	0	1	1	1	0	0	0	1	1	1	1	1	1	1	1	1	1	1	1	1	1	1	0	0	0	1	1	1	1	1	1	1	1	1	1	1	1	1	1	1
KPYM_HUMAN	Pyruvate kinase isozymes M1/M2 OS=Homo sapiens GN=PKM PE=1 SV=4	4.993	0.7777	0.00065	34	22	20	14	13	11	34	26	24	42	25	23	27	19	17	34	21	19	21	11	9	25	16	14	27	20	18	32	15	13	13	12	11	24	16	14	34	19	17	19	15	13	20	14	12
HNRPQ_HUMAN	Heterogeneous nuclear ribonucleoprotein Q OS=Homo sapiens GN=SYNCRIP PE=1 SV=2	3.193	0.7453	0.003088	9	8	4	6	6	2	6	6	2	9	9	4	7	7	3	12	11	5	3	3	1	4	4	1	11	10	5	4	4	2	5	4	1	6	6	2	6	6	3	2	2	1	3	3	1
DDX46_HUMAN	Probable ATP-dependent RNA helicase DDX46 OS=Homo sapiens GN=DDX46 PE=1 SV=2	2.474	0.6421	0.056975	0	0	0	1	1	1	2	2	2	1	1	1	0	0	0	0	0	0	0	0	0	0	0	0	0	0	0	0	0	0	0	0	0	0	0	0	1	1	1	0	0	0	0	0	0
ARK72_HUMAN	Aflatoxin B1 aldehyde reductase member 2 OS=Homo sapiens GN=AKR7A2 PE=1 SV=3	1.095	0.3388	0.346465	0	0	0	0	0	0	0	0	0	0	0	0	0	0	0	1	1	1	0	0	0	0	0	0	0	0	0	0	0	0	0	0	0	0	0	0	0	0	0	0	0	0	0	0	0
TOPK_HUMAN	Lymphokine-activated killer T-cell-originated protein kinase OS=Homo sapiens GN=PBK PE=1 SV=3	1.915	0.4711	0.082109	1	1	1	0	0	0	1	1	1	1	1	1	0	0	0	1	1	1	0	0	0	0	0	0	0	0	0	0	0	0	0	0	0	0	0	0	0	0	0	0	0	0	0	0	0
CHD3_HUMAN	Chromodomain-helicase-DNA-binding protein 3 OS=Homo sapiens GN=CHD3 PE=1 SV=3	3.252	0.6411	0.446918	1	1	0	1	1	0	1	1	0	0	0	0	0	0	0	0	0	0	0	0	0	0	0	0	0	0	0	0	0	0	0	0	0	0	0	0	0	0	0	0	0	0	0	0	0
GLRX1_HUMAN	Glutaredoxin-1 OS=Homo sapiens GN=GLRX PE=1 SV=2	1.968	0.6194	0.301985	1	1	1	0	0	0	0	0	0	0	0	0	0	0	0	0	0	0	0	0	0	0	0	0	0	0	0	0	0	0	0	0	0	0	0	0	0	0	0	0	0	0	0	0	0
DSG1_HUMAN	Desmoglein-1 OS=Homo sapiens GN=DSG1 PE=1 SV=2	3.398	0.7905	0.003644	3	3	3	0	0	0	1	1	1	5	5	5	5	5	5	5	5	5	3	3	3	2	2	2	3	3	3	1	1	1	4	4	4	5	5	5	3	3	3	3	3	3	0	0	0
PGAM5_HUMAN	Serine/threonine-protein phosphatase PGAM5, mitochondrial OS=Homo sapiens GN=PGAM5 PE=1 SV=2	2.78	0.7003	0.049257	0	0	0	0	0	0	2	2	2	6	6	6	1	1	1	2	2	2	0	0	0	1	1	1	3	3	3	1	1	1	0	0	0	0	0	0	1	1	1	0	0	0	1	1	1
THOC3_HUMAN	THO complex subunit 3 OS=Homo sapiens GN=THOC3 PE=1 SV=1	1.705	0.5076	0.654258	0	0	0	0	0	0	1	1	1	0	0	0	0	0	0	0	0	0	0	0	0	0	0	0	0	0	0	1	1	1	0	0	0	1	1	1	0	0	0	0	0	0	0	0	0
TTC1_HUMAN	Tetratricopeptide repeat protein 1 OS=Homo sapiens GN=TTC1 PE=1 SV=1	1.475	0.4481	0.398343	0	0	0	0	0	0	2	2	2	0	0	0	0	0	0	1	1	1	0	0	0	0	0	0	0	0	0	0	0	0	0	0	0	0	0	0	0	0	0	0	0	0	0	0	0
UMPS_HUMAN	Uridine 5'-monophosphate synthase OS=Homo sapiens GN=UMPS PE=1 SV=1	1.835	0.5351	0.360411	0	0	0	0	0	0	0	0	0	0	0	0	0	0	0	0	0	0	0	0	0	0	0	0	0	0	0	0	0	0	0	0	0	0	0	0	0	0	0	0	0	0	0	0	0
ASUN_HUMAN	Protein asunder homolog OS=Homo sapiens GN=Asun PE=1 SV=2	1.407	0.4883	1.36569	1	1	1	0	0	0	0	0	0	0	0	0	0	0	0	0	0	0	0	0	0	0	0	0	0	0	0	0	0	0	0	0	0	0	0	0	0	0	0	0	0	0	0	0	0
RL3L_HUMAN	60S ribosomal protein L3-like OS=Homo sapiens GN=RPL3L PE=1 SV=3	1.521	0.4267	0.296246	1	1	0	1	1	0	1	1	0	1	1	0	1	1	0	1	1	0	1	1	0	1	1	0	1	1	0	1	1	0	1	1	0	1	1	0	1	1	0	1	1	0	1	1	0
TMEDA_HUMAN	Transmembrane emp24 domain-containing protein 10 OS=Homo sapiens GN=TMED10 PE=1 SV=2	3.524	0.6835	0.071976	1	1	1	0	0	0	1	1	1	1	1	1	0	0	0	1	1	1	0	0	0	0	0	0	0	0	0	0	0	0	0	0	0	0	0	0	1	1	1	0	0	0	0	0	0
XP32_HUMAN	Skin-specific protein 32 OS=Homo sapiens GN=XP32 PE=1 SV=1	1.899	0.61	0.001848	0	0	0	0	0	0	1	1	1	1	1	1	1	1	1	1	1	1	0	0	0	1	1	1	1	1	1	1	1	1	0	0	0	1	1	1	0	0	0	0	0	0	1	1	1
PSA_HUMAN	Puromycin-sensitive aminopeptidase OS=Homo sapiens GN=NPEPPS PE=1 SV=2	2.991	0.7558	0.098891	3	3	0	0	0	0	1	1	1	1	1	0	1	1	1	1	1	0	0	0	0	0	0	0	3	3	0	0	0	0	0	0	0	1	1	0	2	2	0	0	0	0	0	0	0
ACPH_HUMAN	Acylamino-acid-releasing enzyme OS=Homo sapiens GN=APEH PE=1 SV=4	2.318	0.5595	0.006914	2	2	2	0	0	0	2	2	2	1	1	1	1	1	1	3	3	3	0	0	0	0	0	0	3	3	3	1	1	1	0	0	0	2	2	2	1	1	1	0	0	0	1	1	1
IBP4_HUMAN	Insulin-like growth factor-binding protein 4 OS=Homo sapiens GN=IGFBP4 PE=1 SV=2	1.726	0.3146	0.612207	0	0	0	0	0	0	1	1	1	1	1	1	0	0	0	0	0	0	0	0	0	1	1	1	0	0	0	1	1	1	1	1	1	1	1	1	1	1	1	0	0	0	0	0	0
FLOT1_HUMAN	Flotillin-1 OS=Homo sapiens GN=FLOT1 PE=1 SV=3	2.578	0.6926	0.21866	1	1	1	0	0	0	1	1	1	1	1	1	0	0	0	0	0	0	0	0	0	0	0	0	0	0	0	0	0	0	0	0	0	0	0	0	0	0	0	0	0	0	0	0	0
HS105_HUMAN	Heat shock protein 105 kDa OS=Homo sapiens GN=HSPH1 PE=1 SV=1	3.274	0.6943	0.00502	19	17	15	13	13	11	17	16	14	9	9	9	7	7	6	10	9	7	4	4	3	5	5	5	11	11	11	8	7	6	4	4	3	8	8	8	9	8	7	3	3	3	5	5	5
TOP2B_HUMAN	DNA topoisomerase 2-beta OS=Homo sapiens GN=TOP2B PE=1 SV=3	2.531	0.6133	0.02045	0	0	0	0	0	0	0	0	0	8	8	1	5	5	1	1	1	0	1	1	0	2	2	0	12	12	3	0	0	0	0	0	0	9	9	2	1	1	0	0	0	0	0	0	0
ETFA_HUMAN	Electron transfer flavoprotein subunit alpha, mitochondrial OS=Homo sapiens GN=ETFA PE=1 SV=1	2.358	0.653	0.079486	0	0	0	0	0	0	2	2	2	0	0	0	0	0	0	1	1	1	0	0	0	0	0	0	1	1	1	0	0	0	0	0	0	0	0	0	1	1	1	1	1	1	0	0	0
PSB4_HUMAN	Proteasome subunit beta type-4 OS=Homo sapiens GN=PSMB4 PE=1 SV=4	2.193	0.6201	0.005866	7	6	6	1	1	1	3	3	3	5	4	4	4	3	3	2	2	2	1	1	1	2	2	2	2	2	2	2	2	2	1	1	1	3	3	3	3	3	3	1	1	1	2	2	2
RAB5C_HUMAN	Ras-related protein Rab-5C OS=Homo sapiens GN=RAB5C PE=1 SV=2	2.026	0.6699	0.008765	2	2	1	0	0	0	2	2	1	1	1	1	0	0	0	2	2	1	0	0	0	0	0	0	0	0	0	1	1	1	0	0	0	0	0	0	1	1	1	0	0	0	1	1	1
KRT34_HUMAN	Keratin, type I cuticular Ha4 OS=Homo sapiens GN=KRT34 PE=2 SV=2	2.1	0.6067	0.012524	0	0	0	0	0	0	7	7	2	1	1	0	2	2	0	0	0	0	0	0	0	1	1	0	0	0	0	0	0	0	2	2	1	0	0	0	0	0	0	0	0	0	0	0	0
KCRB_HUMAN	Creatine kinase B-type OS=Homo sapiens GN=CKB PE=1 SV=1	2.845	0.6436	0.003553	7	6	6	1	1	1	4	4	4	5	4	4	1	1	1	5	5	4	0	0	0	1	1	1	3	3	3	2	2	2	1	1	1	0	0	0	5	5	4	1	1	1	1	1	1
DHE4_HUMAN	Glutamate dehydrogenase 2, mitochondrial OS=Homo sapiens GN=GLUD2 PE=1 SV=2	2.591	0.7034	0.008554	10	10	0	0	0	0	7	7	0	6	6	0	3	3	0	6	6	0	1	1	0	1	1	0	5	5	0	3	3	0	3	3	0	4	4	0	5	5	0	1	1	0	4	4	0
SF01_HUMAN	Splicing factor 1 OS=Homo sapiens GN=SF1 PE=1 SV=4	2.626	0.6858	0.017248	1	1	1	0	0	0	1	1	1	3	3	3	2	2	2	3	3	3	1	1	1	0	0	0	2	2	2	0	0	0	0	0	0	1	1	1	3	3	3	0	0	0	1	1	1
STMN1_HUMAN	Stathmin OS=Homo sapiens GN=STMN1 PE=1 SV=3	2.703	0.6519	0.040031	4	4	2	1	1	1	3	3	1	6	6	4	2	2	1	5	5	2	0	0	0	1	1	1	0	0	0	4	4	2	1	1	1	1	1	0	5	5	4	1	1	1	4	4	2
NAA11_HUMAN	N-alpha-acetyltransferase 11 OS=Homo sapiens GN=NAA11 PE=1 SV=3	1.852	0.7516	0.11283	1	1	0	0	0	0	0	0	0	1	1	0	0	0	0	2	2	0	0	0	0	0	0	0	0	0	0	0	0	0	0	0	0	1	1	0	0	0	0	1	1	0	0	0	0
MAGA4_HUMAN	Melanoma-associated antigen 4 OS=Homo sapiens GN=MAGEA4 PE=1 SV=2	1.594	0.5631	0.583009	2	2	0	0	0	0	0	0	0	0	0	0	0	0	0	0	0	0	0	0	0	0	0	0	0	0	0	0	0	0	0	0	0	0	0	0	0	0	0	0	0	0	0	0	0
ELAV1_HUMAN	ELAV-like protein 1 OS=Homo sapiens GN=ELAVL1 PE=1 SV=2	2.734	0.7264	0.009323	5	5	5	2	2	2	2	2	2	5	5	4	1	1	1	2	2	2	0	0	0	2	2	2	3	3	3	1	1	1	1	1	1	1	1	1	1	1	0	2	2	2	2	2	2
RL36A_HUMAN	60S ribosomal protein L36a OS=Homo sapiens GN=RPL36A PE=1 SV=2	2.48	0.512	0.008178	2	2	1	1	1	0	2	2	1	1	1	0	1	1	1	3	3	2	1	1	1	2	2	1	0	0	0	0	0	0	0	0	0	2	2	1	1	1	0	1	1	1	1	1	1
SRSF3_HUMAN	Serine/arginine-rich splicing factor 3 OS=Homo sapiens GN=SRSF3 PE=1 SV=1	2.426	0.7386	0.020995	5	5	4	2	2	2	3	3	2	8	7	6	4	3	3	8	6	5	1	1	1	2	2	2	4	3	2	2	2	2	0	0	0	3	2	2	1	1	1	0	0	0	2	2	2
ITAV_HUMAN	Integrin alpha-V OS=Homo sapiens GN=ITGAV PE=1 SV=2	1.897	0.2884	0.87737	0	0	0	0	0	0	0	0	0	0	0	0	0	0	0	1	1	1	0	0	0	0	0	0	0	0	0	0	0	0	0	0	0	0	0	0	0	0	0	0	0	0	0	0	0
UCHL3_HUMAN	Ubiquitin carboxyl-terminal hydrolase isozyme L3 OS=Homo sapiens GN=UCHL3 PE=1 SV=1	1.329	0.3273	0.058347	0	0	0	0	0	0	0	0	0	0	0	0	0	0	0	1	1	1	0	0	0	0	0	0	0	0	0	0	0	0	0	0	0	0	0	0	0	0	0	0	0	0	0	0	0
TBB2A_HUMAN	Tubulin beta-2A chain OS=Homo sapiens GN=TUBB2A PE=1 SV=1	3.788	0.7512	0.00026	35	14	0	56	12	0	44	17	0	35	13	1	26	8	0	26	11	1	24	7	0	23	8	0	28	10	0	29	8	0	20	8	0	27	8	0	31	9	0	22	6	0	20	7	0
VPS35_HUMAN	Vacuolar protein sorting-associated protein 35 OS=Homo sapiens GN=VPS35 PE=1 SV=2	2.09	0.428	0.055176	3	3	3	0	0	0	0	0	0	2	2	2	0	0	0	1	1	1	0	0	0	0	0	0	0	0	0	0	0	0	0	0	0	0	0	0	1	1	1	0	0	0	0	0	0
PRS4_HUMAN	26S protease regulatory subunit 4 OS=Homo sapiens GN=PSMC1 PE=1 SV=1	2.824	0.6526	0.018619	11	11	10	9	8	7	10	9	9	3	3	3	4	4	3	5	5	4	1	1	1	0	0	0	2	2	2	0	0	0	0	0	0	2	2	1	2	2	2	0	0	0	1	1	1
CR063_HUMAN	Uncharacterized protein C18orf63 OS=Homo sapiens GN=C18orf63 PE=2 SV=2	1.037	0.1765	1.8401	0	0	0	0	0	0	0	0	0	0	0	0	0	0	0	0	0	0	0	0	0	0	0	0	0	0	0	0	0	0	0	0	0	0	0	0	0	0	0	0	0	0	0	0	0
IF5A1_HUMAN	Eukaryotic translation initiation factor 5A-1 OS=Homo sapiens GN=EIF5A PE=1 SV=2	2.52	0.644	0.038025	5	4	0	0	0	0	5	5	1	4	4	1	2	2	0	4	2	0	2	2	0	4	3	0	2	2	0	3	2	0	2	2	0	4	3	0	4	3	0	3	2	0	5	3	0
E41L2_HUMAN	Band 4.1-like protein 2 OS=Homo sapiens GN=EPB41L2 PE=1 SV=1	1.514	0.4042	1.02136	0	0	0	0	0	0	1	1	1	0	0	0	0	0	0	0	0	0	0	0	0	0	0	0	0	0	0	0	0	0	0	0	0	0	0	0	0	0	0	0	0	0	0	0	0
STXB1_HUMAN	Syntaxin-binding protein 1 OS=Homo sapiens GN=STXBP1 PE=1 SV=1	2.082	0.6335	0.018275	0	0	0	0	0	0	2	2	2	1	1	1	1	1	1	1	1	1	0	0	0	0	0	0	0	0	0	0	0	0	0	0	0	0	0	0	1	1	1	0	0	0	0	0	0
TADBP_HUMAN	TAR DNA-binding protein 43 OS=Homo sapiens GN=TARDBP PE=1 SV=1	2.736	0.7911	0.009486	6	6	5	4	4	4	5	5	4	6	6	5	3	3	2	6	6	5	3	3	3	3	3	3	5	5	4	5	5	5	2	2	2	4	4	4	4	4	4	4	4	4	5	5	5
GRSF1_HUMAN	G-rich sequence factor 1 OS=Homo sapiens GN=GRSF1 PE=1 SV=3	1.939	0.6161	0.171345	2	2	2	0	0	0	1	1	1	2	2	2	2	2	2	3	3	3	0	0	0	1	1	1	2	2	2	2	2	2	2	2	2	2	2	2	2	2	2	0	0	0	1	1	1
HNRPR_HUMAN	Heterogeneous nuclear ribonucleoprotein R OS=Homo sapiens GN=HNRNPR PE=1 SV=1	3.47	0.7453	0.003088	8	7	3	8	7	3	8	8	4	11	10	5	10	9	5	14	13	7	3	3	1	7	7	4	14	13	8	6	6	4	8	7	4	12	11	7	6	6	3	2	2	1	5	5	3
LMAN1_HUMAN	Protein ERGIC-53 OS=Homo sapiens GN=LMAN1 PE=1 SV=2	2.52	0.6917	0.050518	5	5	5	3	3	3	6	6	6	4	4	4	2	2	2	5	5	5	1	1	1	1	1	1	2	2	2	2	2	2	0	0	0	4	4	4	2	2	2	0	0	0	2	2	2
CBPA4_HUMAN	Carboxypeptidase A4 OS=Homo sapiens GN=CPA4 PE=1 SV=2	2.182	0.5302	0.273065	0	0	0	0	0	0	0	0	0	0	0	0	0	0	0	0	0	0	0	0	0	0	0	0	0	0	0	0	0	0	0	0	0	0	0	0	0	0	0	0	0	0	0	0	0
TBB2B_HUMAN	Tubulin beta-2B chain OS=Homo sapiens GN=TUBB2B PE=1 SV=1	3.788	0.7512	0.00026	35	14	0	56	12	0	44	17	0	34	12	0	26	8	0	25	10	0	24	7	0	23	8	0	28	10	0	29	8	0	20	8	0	27	8	0	31	9	0	22	6	0	20	7	0
GTD2B_HUMAN	General transcription factor II-I repeat domain-containing protein 2B OS=Homo sapiens GN=GTF2IRD2B PE=1 SV=1	1.253	0.1804	0.232279	0	0	0	0	0	0	0	0	0	0	0	0	0	0	0	0	0	0	0	0	0	0	0	0	0	0	0	1	1	0	0	0	0	0	0	0	0	0	0	0	0	0	0	0	0
ACTN1_HUMAN	Alpha-actinin-1 OS=Homo sapiens GN=ACTN1 PE=1 SV=2	5.304	0.7903	0.006076	21	19	5	9	9	1	20	18	5	16	16	5	9	7	2	14	13	4	2	2	0	4	4	0	15	13	4	7	7	2	6	6	1	8	8	1	12	9	2	5	5	1	5	5	0
SMCE1_HUMAN	SWI/SNF-related matrix-associated actin-dependent regulator of chromatin subfamily E member 1 OS=Homo sapiens GN=SMARCE1 PE=1 SV=2	2.185	0.6737	0.233347	0	0	0	0	0	0	0	0	0	1	1	1	1	1	1	2	2	2	0	0	0	0	0	0	1	1	1	0	0	0	0	0	0	0	0	0	0	0	0	0	0	0	0	0	0
IAH1_HUMAN	Isoamyl acetate-hydrolyzing esterase 1 homolog OS=Homo sapiens GN=IAH1 PE=1 SV=1	1.542	0.4429	1.1473	0	0	0	0	0	0	0	0	0	0	0	0	0	0	0	0	0	0	0	0	0	0	0	0	0	0	0	0	0	0	0	0	0	0	0	0	1	1	1	0	0	0	0	0	0
DCTP1_HUMAN	dCTP pyrophosphatase 1 OS=Homo sapiens GN=DCTPP1 PE=1 SV=1	2.257	0.4843	0.319175	1	1	1	0	0	0	0	0	0	0	0	0	0	0	0	0	0	0	0	0	0	0	0	0	0	0	0	1	1	1	0	0	0	0	0	0	0	0	0	0	0	0	0	0	0
PLOD2_HUMAN	Procollagen-lysine,2-oxoglutarate 5-dioxygenase 2 OS=Homo sapiens GN=PLOD2 PE=1 SV=2	2.495	0.7473	0.013395	4	4	4	0	0	0	2	2	2	4	4	4	1	1	1	2	2	2	0	0	0	1	1	1	3	3	3	1	1	1	1	1	1	2	2	2	2	2	2	1	1	1	1	1	1
RAB1C_HUMAN	Putative Ras-related protein Rab-1C OS=Homo sapiens GN=RAB1C PE=5 SV=2	2.392	0.4974	0.012709	2	2	0	0	0	0	3	3	0	3	3	0	1	1	0	2	2	0	0	0	0	0	0	0	1	1	0	1	1	0	0	0	0	1	1	0	2	2	0	0	0	0	1	1	0
RUVB1_HUMAN	RuvB-like 1 OS=Homo sapiens GN=RUVBL1 PE=1 SV=1	2.766	0.6887	0.005078	9	8	8	6	6	6	7	7	7	5	5	5	4	4	4	6	6	6	2	2	2	2	2	2	6	6	6	3	3	3	1	1	1	5	5	5	4	4	4	2	2	2	2	2	2
ANXA6_HUMAN	Annexin A6 OS=Homo sapiens GN=ANXA6 PE=1 SV=3	2.769	0.4534	0.074939	3	3	3	0	0	0	0	0	0	0	0	0	0	0	0	1	1	1	0	0	0	0	0	0	0	0	0	0	0	0	0	0	0	0	0	0	1	1	1	0	0	0	0	0	0
SC23A_HUMAN	Protein transport protein Sec23A OS=Homo sapiens GN=SEC23A PE=1 SV=2	1.896	0.6554	0.025585	1	1	1	0	0	0	0	0	0	1	1	1	0	0	0	0	0	0	0	0	0	0	0	0	0	0	0	0	0	0	0	0	0	1	1	1	1	1	1	0	0	0	0	0	0
MAGA8_HUMAN	Melanoma-associated antigen 8 OS=Homo sapiens GN=MAGEA8 PE=2 SV=2	1.594	0.5631	0.583009	2	2	0	0	0	0	0	0	0	0	0	0	0	0	0	0	0	0	0	0	0	0	0	0	0	0	0	0	0	0	0	0	0	0	0	0	0	0	0	0	0	0	0	0	0
VDAC3_HUMAN	Voltage-dependent anion-selective channel protein 3 OS=Homo sapiens GN=VDAC3 PE=1 SV=1	2.679	0.5661	0.005276	1	1	1	0	0	0	1	1	1	1	1	1	0	0	0	1	1	1	0	0	0	0	0	0	1	1	1	0	0	0	0	0	0	0	0	0	0	0	0	0	0	0	0	0	0
NEB2_HUMAN	Neurabin-2 OS=Homo sapiens GN=PPP1R9B PE=1 SV=2	1.099	0.3703	0.31385	0	0	0	0	0	0	0	0	0	0	0	0	0	0	0	0	0	0	0	0	0	0	0	0	1	1	1	0	0	0	0	0	0	0	0	0	0	0	0	0	0	0	0	0	0
ECI2_HUMAN	Enoyl-CoA delta isomerase 2, mitochondrial OS=Homo sapiens GN=ECI2 PE=1 SV=4	1.144	0.326	0.573004	0	0	0	0	0	0	0	0	0	0	0	0	0	0	0	0	0	0	0	0	0	0	0	0	0	0	0	0	0	0	0	0	0	0	0	0	1	1	1	0	0	0	0	0	0
RB6I2_HUMAN	ELKS/Rab6-interacting/CAST family member 1 OS=Homo sapiens GN=ERC1 PE=1 SV=1	1.399	0.4532	0.384669	0	0	0	0	0	0	0	0	0	0	0	0	0	0	0	0	0	0	0	0	0	0	0	0	0	0	0	0	0	0	0	0	0	0	0	0	1	1	1	0	0	0	0	0	0
MP2K2_HUMAN	Dual specificity mitogen-activated protein kinase kinase 2 OS=Homo sapiens GN=MAP2K2 PE=1 SV=1	1.504	0.2081	1.12621	0	0	0	0	0	0	0	0	0	0	0	0	0	0	0	0	0	0	0	0	0	0	0	0	0	0	0	0	0	0	0	0	0	1	1	0	0	0	0	0	0	0	0	0	0
GLOD4_HUMAN	Glyoxalase domain-containing protein 4 OS=Homo sapiens GN=GLOD4 PE=1 SV=1	2.157	0.5669	0.120943	1	1	1	0	0	0	1	1	1	2	2	2	0	0	0	2	2	2	0	0	0	0	0	0	1	1	1	0	0	0	0	0	0	0	0	0	1	1	1	0	0	0	0	0	0
EMR2_HUMAN	EGF-like module-containing mucin-like hormone receptor-like 2 OS=Homo sapiens GN=EMR2 PE=1 SV=2	2.223	0.5363	0.463242	0	0	0	0	0	0	1	1	0	0	0	0	0	0	0	0	0	0	0	0	0	0	0	0	1	1	0	0	0	0	0	0	0	1	1	0	0	0	0	0	0	0	1	1	0
DDX17_HUMAN	Probable ATP-dependent RNA helicase DDX17 OS=Homo sapiens GN=DDX17 PE=1 SV=2	3.316	0.7249	0.007952	13	13	9	7	7	4	13	13	8	13	11	7	7	6	3	15	13	8	3	3	1	8	6	3	10	9	6	10	7	4	6	6	2	12	10	6	12	8	5	4	4	2	7	5	2
RAB2A_HUMAN	Ras-related protein Rab-2A OS=Homo sapiens GN=RAB2A PE=1 SV=1	3.061	0.7628	0.00376	1	1	1	0	0	0	1	1	1	1	1	1	0	0	0	1	1	1	0	0	0	0	0	0	1	1	1	0	0	0	0	0	0	0	0	0	0	0	0	0	0	0	0	0	0
XRCC1_HUMAN	DNA repair protein XRCC1 OS=Homo sapiens GN=XRCC1 PE=1 SV=2	1.824	0.5681	0.544203	0	0	0	0	0	0	1	1	1	0	0	0	0	0	0	0	0	0	0	0	0	0	0	0	1	1	1	0	0	0	0	0	0	0	0	0	0	0	0	0	0	0	0	0	0
CSRP2_HUMAN	Cysteine and glycine-rich protein 2 OS=Homo sapiens GN=CSRP2 PE=1 SV=3	3.186	0.7818	0.008111	5	5	5	6	5	5	4	4	4	6	5	5	3	3	3	3	3	3	2	2	2	2	2	2	3	3	3	6	3	3	5	4	4	5	3	3	5	3	3	3	3	3	5	3	3
RAP1A_HUMAN	Ras-related protein Rap-1A OS=Homo sapiens GN=RAP1A PE=1 SV=1	2.222	0.6279	0.124444	1	1	0	0	0	0	1	1	0	1	1	0	0	0	0	1	1	0	0	0	0	0	0	0	0	0	0	0	0	0	0	0	0	0	0	0	1	1	0	0	0	0	0	0	0
CSTFT_HUMAN	Cleavage stimulation factor subunit 2 tau variant OS=Homo sapiens GN=CSTF2T PE=1 SV=1	1.834	0.6887	0.064362	1	1	0	1	1	0	0	0	0	0	0	0	0	0	0	1	1	0	0	0	0	0	0	0	1	1	0	0	0	0	0	0	0	0	0	0	0	0	0	0	0	0	0	0	0
RAB3A_HUMAN	Ras-related protein Rab-3A OS=Homo sapiens GN=RAB3A PE=1 SV=1	1.174	0.47	0.052989	0	0	0	0	0	0	0	0	0	1	1	0	0	0	0	1	1	0	0	0	0	0	0	0	0	0	0	0	0	0	0	0	0	0	0	0	1	1	0	0	0	0	0	0	0
NEXN_HUMAN	Nexilin OS=Homo sapiens GN=NEXN PE=1 SV=1	1.381	0.1991	0.833355	0	0	0	0	0	0	0	0	0	0	0	0	0	0	0	0	0	0	0	0	0	0	0	0	1	1	1	0	0	0	0	0	0	0	0	0	0	0	0	0	0	0	0	0	0
GEMI5_HUMAN	Gem-associated protein 5 OS=Homo sapiens GN=GEMIN5 PE=1 SV=3	2.119	0.5894	0.017895	3	3	3	0	0	0	4	4	4	1	1	1	0	0	0	1	1	1	0	0	0	0	0	0	2	2	2	0	0	0	1	1	1	1	1	1	0	0	0	0	0	0	0	0	0
MOGS_HUMAN	Mannosyl-oligosaccharide glucosidase OS=Homo sapiens GN=MOGS PE=1 SV=5	1.02	0.3588	0.652771	0	0	0	0	0	0	1	1	1	0	0	0	0	0	0	0	0	0	0	0	0	0	0	0	0	0	0	0	0	0	0	0	0	0	0	0	0	0	0	0	0	0	0	0	0
MCCB_HUMAN	Methylcrotonoyl-CoA carboxylase beta chain, mitochondrial OS=Homo sapiens GN=MCCC2 PE=1 SV=1	1.206	0.4312	0.928574	0	0	0	0	0	0	0	0	0	0	0	0	0	0	0	0	0	0	0	0	0	0	0	0	0	0	0	0	0	0	0	0	0	0	0	0	0	0	0	0	0	0	0	0	0
BIRC5_HUMAN	Baculoviral IAP repeat-containing protein 5 OS=Homo sapiens GN=BIRC5 PE=1 SV=3	1.314	0.3719	0.303939	0	0	0	0	0	0	0	0	0	1	1	1	1	1	1	0	0	0	0	0	0	0	0	0	0	0	0	0	0	0	0	0	0	0	0	0	0	0	0	0	0	0	0	0	0
CH60_HUMAN	60 kDa heat shock protein, mitochondrial OS=Homo sapiens GN=HSPD1 PE=1 SV=2	4.415	0.8012	0.000242	35	24	24	17	13	13	29	22	22	25	20	20	20	16	16	30	21	21	16	9	9	18	14	14	21	16	16	25	16	16	11	11	11	23	17	17	24	17	17	16	12	12	20	14	14
PRC2C_HUMAN	Protein PRRC2C OS=Homo sapiens GN=PRRC2C PE=1 SV=4	2.562	0.5627	0.003121	1	1	0	0	0	0	0	0	0	0	0	0	1	1	0	4	4	3	0	0	0	0	0	0	2	2	1	0	0	0	0	0	0	1	1	0	2	2	1	0	0	0	0	0	0
NFL_HUMAN	Neurofilament light polypeptide OS=Homo sapiens GN=NEFL PE=1 SV=3	1.861	0.4929	0.014604	1	1	0	1	1	0	1	1	0	2	1	0	1	1	0	2	1	0	0	0	0	0	0	0	2	1	0	2	1	0	1	1	0	2	1	0	1	1	0	1	1	0	1	1	0
NFM_HUMAN	Neurofilament medium polypeptide OS=Homo sapiens GN=NEFM PE=1 SV=3	1.861	0.4929	0.014604	1	1	0	1	1	0	1	1	0	2	1	0	1	1	0	2	1	0	0	0	0	0	0	0	3	2	0	2	1	0	1	1	0	2	1	0	1	1	0	1	1	0	1	1	0
AINX_HUMAN	Alpha-internexin OS=Homo sapiens GN=INA PE=1 SV=2	2.21	0.5774	0.014604	1	1	0	1	1	0	1	1	0	2	1	0	1	1	0	2	1	0	0	0	0	0	0	0	6	5	3	2	1	0	1	1	0	2	1	0	1	1	0	1	1	0	1	1	0
NFH_HUMAN	Neurofilament heavy polypeptide OS=Homo sapiens GN=NEFH PE=1 SV=4	1.861	0.4929	0.014604	1	1	0	1	1	0	1	1	0	2	1	0	1	1	0	2	1	0	0	0	0	0	0	0	2	1	0	2	1	0	1	1	0	2	1	0	1	1	0	1	1	0	1	1	0
GNL3_HUMAN	Guanine nucleotide-binding protein-like 3 OS=Homo sapiens GN=GNL3 PE=1 SV=2	1.68	0.5298	0.007527	0	0	0	1	1	1	0	0	0	2	2	2	1	1	1	0	0	0	0	0	0	0	0	0	3	3	3	0	0	0	0	0	0	2	2	2	0	0	0	0	0	0	0	0	0
LRP1_HUMAN	Prolow-density lipoprotein receptor-related protein 1 OS=Homo sapiens GN=LRP1 PE=1 SV=2	0.99	0.3747	0.947571	1	1	1	0	0	0	0	0	0	0	0	0	0	0	0	0	0	0	0	0	0	0	0	0	0	0	0	0	0	0	0	0	0	0	0	0	0	0	0	0	0	0	0	0	0
H2B1L_HUMAN	Histone H2B type 1-L OS=Homo sapiens GN=HIST1H2BL PE=1 SV=3	3.498	0.7264	0.002242	4	3	0	5	3	0	9	4	0	48	9	0	30	7	0	36	9	0	21	4	0	33	5	0	65	9	0	10	3	0	1	1	0	40	7	0	19	5	0	4	3	0	3	2	0
FUMH_HUMAN	Fumarate hydratase, mitochondrial OS=Homo sapiens GN=FH PE=1 SV=3	2.82	0.7532	0.00377	10	10	10	2	2	2	10	10	10	9	9	9	6	6	6	10	9	9	2	2	2	4	4	4	8	8	8	5	5	5	3	3	3	7	7	7	9	9	9	5	5	5	5	5	5
MST4_HUMAN	Serine/threonine-protein kinase MST4 OS=Homo sapiens GN=MST4 PE=1 SV=2	2.096	0.4194	0.027591	0	0	0	0	0	0	1	1	1	1	1	1	1	1	1	1	1	1	0	0	0	0	0	0	0	0	0	0	0	0	0	0	0	1	1	1	1	1	1	0	0	0	0	0	0
CKAP4_HUMAN	Cytoskeleton-associated protein 4 OS=Homo sapiens GN=CKAP4 PE=1 SV=2	3.323	0.6207	0.070223	4	4	4	0	0	0	2	2	2	1	1	1	2	2	2	5	5	4	0	0	0	0	0	0	3	3	2	0	0	0	0	0	0	0	0	0	3	3	3	0	0	0	0	0	0
PPHLN_HUMAN	Periphilin-1 OS=Homo sapiens GN=PPHLN1 PE=1 SV=2	1.239	0.1945	0.835449	0	0	0	0	0	0	0	0	0	0	0	0	0	0	0	0	0	0	0	0	0	0	0	0	1	1	1	0	0	0	0	0	0	0	0	0	0	0	0	0	0	0	0	0	0
H2B1C_HUMAN	Histone H2B type 1-C/E/F/G/I OS=Homo sapiens GN=HIST1H2BC PE=1 SV=4	3.498	0.7264	0.002242	4	3	0	5	3	0	9	4	0	47	8	0	30	7	0	35	8	0	20	3	0	33	5	0	64	8	0	10	3	0	1	1	0	40	7	0	19	5	0	4	3	0	3	2	0
H2B1D_HUMAN	Histone H2B type 1-D OS=Homo sapiens GN=HIST1H2BD PE=1 SV=2	3.498	0.7264	0.002242	4	3	0	5	3	0	9	4	0	47	8	0	30	7	0	35	8	0	20	3	0	33	5	0	64	8	0	10	3	0	1	1	0	40	7	0	19	5	0	4	3	0	3	2	0
H2B1H_HUMAN	Histone H2B type 1-H OS=Homo sapiens GN=HIST1H2BH PE=1 SV=3	3.498	0.7264	0.002242	4	3	0	5	3	0	9	4	0	47	8	0	30	7	0	35	8	0	20	3	0	33	5	0	64	8	0	10	3	0	1	1	0	40	7	0	19	5	0	4	3	0	3	2	0
H2B1K_HUMAN	Histone H2B type 1-K OS=Homo sapiens GN=HIST1H2BK PE=1 SV=3	3.498	0.7264	0.002242	4	3	0	5	3	0	9	4	0	47	8	0	30	7	0	35	8	0	20	3	0	33	5	0	64	8	0	10	3	0	1	1	0	40	7	0	19	5	0	4	3	0	3	2	0
H2B1M_HUMAN	Histone H2B type 1-M OS=Homo sapiens GN=HIST1H2BM PE=1 SV=3	3.498	0.7264	0.002242	4	3	0	5	3	0	9	4	0	47	8	0	30	7	0	35	8	0	20	3	0	33	5	0	64	8	0	10	3	0	1	1	0	40	7	0	19	5	0	4	3	0	3	2	0
H2B1N_HUMAN	Histone H2B type 1-N OS=Homo sapiens GN=HIST1H2BN PE=1 SV=3	3.498	0.7264	0.002242	4	3	0	5	3	0	9	4	0	47	8	0	30	7	0	35	8	0	20	3	0	33	5	0	64	8	0	10	3	0	1	1	0	40	7	0	19	5	0	4	3	0	3	2	0
H2B2F_HUMAN	Histone H2B type 2-F OS=Homo sapiens GN=HIST2H2BF PE=1 SV=3	3.498	0.7264	0.002242	4	3	0	5	3	0	9	4	0	47	8	0	30	7	0	35	8	0	20	3	0	33	5	0	64	8	0	10	3	0	1	1	0	40	7	0	19	5	0	4	3	0	3	2	0
AURKC_HUMAN	Aurora kinase C OS=Homo sapiens GN=AURKC PE=1 SV=1	1.911	0.5334	0.795504	0	0	0	0	0	0	1	1	0	0	0	0	0	0	0	0	0	0	0	0	0	0	0	0	1	1	0	0	0	0	0	0	0	1	1	0	0	0	0	0	0	0	0	0	0
DOP1_HUMAN	Protein dopey-1 OS=Homo sapiens GN=DOPEY1 PE=1 SV=1	1.217	0.2087	0.898528	0	0	0	0	0	0	1	1	1	0	0	0	0	0	0	0	0	0	0	0	0	0	0	0	0	0	0	1	1	1	0	0	0	0	0	0	0	0	0	0	0	0	0	0	0
CL16A_HUMAN	Protein CLEC16A OS=Homo sapiens GN=CLEC16A PE=2 SV=2	1.285	0.3222	0.493279	1	1	1	0	0	0	0	0	0	0	0	0	0	0	0	0	0	0	0	0	0	0	0	0	1	1	1	0	0	0	0	0	0	0	0	0	1	1	1	0	0	0	1	1	1
HORN_HUMAN	Hornerin OS=Homo sapiens GN=HRNR PE=1 SV=2	6.938	0.8476	0.000318	21	16	16	18	15	15	27	19	19	28	22	22	46	26	26	39	24	24	10	10	10	16	13	13	28	19	19	17	14	14	20	17	17	33	16	16	18	15	15	20	13	13	8	7	7
EXOC4_HUMAN	Exocyst complex component 4 OS=Homo sapiens GN=EXOC4 PE=1 SV=1	1.357	0.6338	0.278453	1	1	1	0	0	0	0	0	0	0	0	0	0	0	0	0	0	0	0	0	0	0	0	0	0	0	0	0	0	0	0	0	0	0	0	0	0	0	0	0	0	0	0	0	0
1C02_HUMAN	HLA class I histocompatibility antigen, Cw-2 alpha chain OS=Homo sapiens GN=HLA-C PE=1 SV=1	2.621	0.7085	0.423033	1	1	0	0	0	0	1	1	0	0	0	0	0	0	0	0	0	0	0	0	0	0	0	0	0	0	0	0	0	0	0	0	0	0	0	0	0	0	0	0	0	0	0	0	0
DNJA3_HUMAN	DnaJ homolog subfamily A member 3, mitochondrial OS=Homo sapiens GN=DNAJA3 PE=1 SV=2	1.278	0.615	0.237436	1	1	1	0	0	0	0	0	0	1	1	1	0	0	0	0	0	0	0	0	0	0	0	0	0	0	0	0	0	0	0	0	0	0	0	0	0	0	0	0	0	0	0	0	0
SCRIB_HUMAN	Protein scribble homolog OS=Homo sapiens GN=SCRIB PE=1 SV=4	1.191	0.2317	1.66433	0	0	0	0	0	0	0	0	0	0	0	0	0	0	0	0	0	0	0	0	0	0	0	0	1	1	1	0	0	0	0	0	0	0	0	0	0	0	0	0	0	0	0	0	0
GTF2I_HUMAN	General transcription factor II-I OS=Homo sapiens GN=GTF2I PE=1 SV=2	2.423	0.6154	0.154078	2	2	2	1	1	1	0	0	0	2	2	2	0	0	0	4	4	4	0	0	0	0	0	0	2	2	2	0	0	0	0	0	0	0	0	0	1	1	1	0	0	0	1	1	1
2AAA_HUMAN	Serine/threonine-protein phosphatase 2A 65 kDa regulatory subunit A alpha isoform OS=Homo sapiens GN=PPP2R1A PE=1 SV=4	2.118	0.6514	0.028638	7	7	6	0	0	0	2	2	2	1	1	1	1	1	0	3	3	2	3	3	3	2	2	2	5	5	5	2	2	2	1	1	1	0	0	0	2	2	1	0	0	0	3	3	2
IF5A2_HUMAN	Eukaryotic translation initiation factor 5A-2 OS=Homo sapiens GN=EIF5A2 PE=1 SV=3	2.52	0.644	0.038025	3	3	0	0	0	0	3	3	0	2	2	0	1	1	0	2	1	0	1	1	0	2	2	0	1	1	0	1	1	0	1	1	0	2	2	0	2	2	0	1	1	0	2	2	0
RSSA_HUMAN	40S ribosomal protein SA OS=Homo sapiens GN=RPSA PE=1 SV=4	3.855	0.7656	0.006539	8	6	6	4	4	4	8	7	7	7	5	5	5	3	3	8	6	6	3	2	2	3	2	2	7	4	4	5	2	2	3	2	2	5	4	4	8	6	6	4	3	3	3	2	2
LR16A_HUMAN	Leucine-rich repeat-containing protein 16A OS=Homo sapiens GN=LRRC16A PE=1 SV=1	1.041	0.2392	1.38333	0	0	0	0	0	0	1	1	1	0	0	0	0	0	0	0	0	0	0	0	0	0	0	0	0	0	0	0	0	0	0	0	0	0	0	0	0	0	0	0	0	0	0	0	0
NUMA1_HUMAN	Nuclear mitotic apparatus protein 1 OS=Homo sapiens GN=NUMA1 PE=1 SV=2	3.356	0.7327	0.002413	14	14	14	3	3	3	12	12	12	21	21	21	13	13	13	11	11	11	8	8	8	10	10	10	17	17	17	10	10	10	3	3	3	9	9	9	19	19	19	3	3	3	11	11	11
LPPRC_HUMAN	Leucine-rich PPR motif-containing protein, mitochondrial OS=Homo sapiens GN=LRPPRC PE=1 SV=3	2.352	0.6544	0.026791	3	3	3	0	0	0	5	5	5	6	6	6	3	3	3	9	9	9	0	0	0	1	1	1	4	4	4	0	0	0	0	0	0	2	2	2	7	7	7	0	0	0	1	1	1
KS6A1_HUMAN	Ribosomal protein S6 kinase alpha-1 OS=Homo sapiens GN=RPS6KA1 PE=1 SV=2	1.922	0.4043	0.237803	1	1	0	0	0	0	0	0	0	0	0	0	0	0	0	0	0	0	0	0	0	0	0	0	0	0	0	0	0	0	0	0	0	0	0	0	1	1	0	0	0	0	0	0	0
NXF1_HUMAN	Nuclear RNA export factor 1 OS=Homo sapiens GN=NXF1 PE=1 SV=1	1.704	0.5751	0.089277	1	1	1	0	0	0	1	1	1	2	2	2	0	0	0	2	2	2	0	0	0	0	0	0	1	1	1	0	0	0	0	0	0	2	2	2	1	1	1	0	0	0	0	0	0
ITPR2_HUMAN	Inositol 1,4,5-trisphosphate receptor type 2 OS=Homo sapiens GN=ITPR2 PE=1 SV=2	1.238	0.2011	1.42311	0	0	0	0	0	0	0	0	0	0	0	0	0	0	0	0	0	0	0	0	0	0	0	0	1	1	0	0	0	0	0	0	0	0	0	0	0	0	0	0	0	0	0	0	0
TPR_HUMAN	Nucleoprotein TPR OS=Homo sapiens GN=TPR PE=1 SV=3	2.653	0.6843	0.005102	11	11	11	4	4	4	6	6	6	12	12	12	5	5	5	14	14	14	5	5	5	6	6	6	13	13	13	7	7	7	1	1	1	12	12	12	11	11	11	2	2	2	11	11	11
NUP98_HUMAN	Nuclear pore complex protein Nup98-Nup96 OS=Homo sapiens GN=NUP98 PE=1 SV=4	1.518	0.4307	0.052687	2	2	2	0	0	0	0	0	0	0	0	0	0	0	0	1	1	1	0	0	0	0	0	0	0	0	0	0	0	0	0	0	0	0	0	0	0	0	0	0	0	0	0	0	0
RALY_HUMAN	RNA-binding protein Raly OS=Homo sapiens GN=RALY PE=1 SV=1	2.946	0.6851	0.018085	8	8	8	5	5	5	9	9	9	8	8	8	7	7	7	7	7	7	2	2	2	5	5	5	8	8	8	7	7	7	4	4	4	8	8	8	6	6	6	3	3	3	5	5	5
BUB3_HUMAN	Mitotic checkpoint protein BUB3 OS=Homo sapiens GN=BUB3 PE=1 SV=1	5.303	0.7946	0.000555	9	8	8	5	5	5	8	7	7	7	6	6	4	4	4	8	7	7	3	3	3	4	4	4	5	4	4	4	4	4	2	2	2	5	5	5	8	7	7	3	3	3	4	4	4
CDK7_HUMAN	Cyclin-dependent kinase 7 OS=Homo sapiens GN=CDK7 PE=1 SV=1	1.51	0.4139	0.207879	1	1	1	0	0	0	0	0	0	0	0	0	0	0	0	0	0	0	0	0	0	0	0	0	0	0	0	0	0	0	0	0	0	0	0	0	0	0	0	0	0	0	0	0	0
CA167_HUMAN	Uncharacterized protein C1orf167 OS=Homo sapiens GN=C1orf167 PE=2 SV=2	1.476	0.3171	1.11081	0	0	0	0	0	0	0	0	0	0	0	0	0	0	0	0	0	0	0	0	0	0	0	0	1	1	1	0	0	0	0	0	0	0	0	0	0	0	0	0	0	0	0	0	0
SYTC_HUMAN	Threonine--tRNA ligase, cytoplasmic OS=Homo sapiens GN=TARS PE=1 SV=3	3.058	0.69	0.01315	20	17	16	11	11	11	16	14	14	16	14	13	5	4	4	13	12	12	3	3	3	7	7	7	7	6	6	9	9	9	6	6	6	9	8	8	10	8	8	6	6	6	6	5	5
SRSF2_HUMAN	Serine/arginine-rich splicing factor 2 OS=Homo sapiens GN=SRSF2 PE=1 SV=4	3.639	0.7251	0.010616	6	5	3	3	3	1	5	5	3	3	3	2	4	4	2	4	4	2	3	3	2	3	3	1	3	3	1	5	5	3	2	2	0	4	4	2	4	4	2	2	2	0	4	4	2
COF1_HUMAN	Cofilin-1 OS=Homo sapiens GN=CFL1 PE=1 SV=3	3.314	0.7511	0.026261	13	9	4	6	6	2	10	9	4	9	8	3	13	10	5	10	9	4	7	6	2	10	8	4	9	8	4	11	8	4	5	5	2	7	7	3	13	10	5	8	8	4	9	7	4
SPTB2_HUMAN	Spectrin beta chain, non-erythrocytic 1 OS=Homo sapiens GN=SPTBN1 PE=1 SV=2	3.587	0.7135	0.008137	21	21	20	5	5	4	10	10	9	14	14	13	9	9	8	12	11	11	3	3	3	4	4	4	15	14	14	6	6	6	3	3	3	10	10	10	12	12	11	3	3	3	11	11	11
ANXA1_HUMAN	Annexin A1 OS=Homo sapiens GN=ANXA1 PE=1 SV=2	3.476	0.7936	0.012803	11	10	10	0	0	0	9	9	9	8	8	8	4	4	4	7	7	7	2	2	2	4	4	4	3	3	3	4	4	4	2	2	2	5	5	5	8	8	8	3	3	3	4	4	4
K2C7_HUMAN	Keratin, type II cytoskeletal 7 OS=Homo sapiens GN=KRT7 PE=1 SV=5	3.006	0.736	0.000375	29	25	18	30	21	15	30	26	18	34	22	12	28	15	9	30	23	14	50	11	6	33	16	10	58	31	22	36	20	13	40	16	11	41	25	18	26	16	10	28	12	7	29	17	11
JPH1_HUMAN	Junctophilin-1 OS=Homo sapiens GN=JPH1 PE=1 SV=2	1.95	0.2826	1.46751	0	0	0	0	0	0	0	0	0	0	0	0	0	0	0	0	0	0	0	0	0	0	0	0	0	0	0	0	0	0	0	0	0	0	0	0	1	1	1	0	0	0	0	0	0
ERP44_HUMAN	Endoplasmic reticulum resident protein 44 OS=Homo sapiens GN=ERP44 PE=1 SV=1	2.351	0.4062	0.157502	2	1	1	0	0	0	2	2	2	2	1	1	0	0	0	3	2	2	0	0	0	0	0	0	0	0	0	0	0	0	0	0	0	0	0	0	2	1	1	0	0	0	0	0	0
RPN1_HUMAN	Dolichyl-diphosphooligosaccharide--protein glycosyltransferase subunit 1 OS=Homo sapiens GN=RPN1 PE=1 SV=1	3.049	0.7237	0.02772	16	15	15	9	9	9	17	16	16	12	12	12	8	8	8	16	15	15	4	4	4	7	7	7	13	13	13	7	7	7	4	4	4	7	7	7	11	11	11	7	7	7	8	8	8
GTD2A_HUMAN	General transcription factor II-I repeat domain-containing protein 2A OS=Homo sapiens GN=GTF2IRD2 PE=2 SV=2	1.253	0.1804	0.232279	0	0	0	0	0	0	0	0	0	0	0	0	0	0	0	0	0	0	0	0	0	0	0	0	0	0	0	1	1	0	0	0	0	0	0	0	0	0	0	0	0	0	0	0	0
K6PP_HUMAN	6-phosphofructokinase type C OS=Homo sapiens GN=PFKP PE=1 SV=2	2.768	0.7244	0.007518	11	9	7	2	2	1	11	10	8	11	11	10	5	5	4	9	8	7	3	3	2	4	4	3	9	8	7	5	4	3	2	2	1	6	6	5	7	6	5	2	2	1	5	5	4
GNAT2_HUMAN	Guanine nucleotide-binding protein G(t) subunit alpha-2 OS=Homo sapiens GN=GNAT2 PE=1 SV=4	2.329	0.5987	0.003423	1	1	0	1	1	0	0	0	0	1	1	0	0	0	0	1	1	0	0	0	0	0	0	0	0	0	0	0	0	0	0	0	0	0	0	0	1	1	0	0	0	0	0	0	0
SUCA_HUMAN	Succinyl-CoA ligase [ADP/GDP-forming] subunit alpha, mitochondrial OS=Homo sapiens GN=SUCLG1 PE=1 SV=4	1.577	0.532	0.018831	0	0	0	0	0	0	0	0	0	0	0	0	0	0	0	0	0	0	1	1	1	0	0	0	1	1	1	1	1	1	0	0	0	0	0	0	1	1	1	1	1	1	0	0	0
CYFP2_HUMAN	Cytoplasmic FMR1-interacting protein 2 OS=Homo sapiens GN=CYFIP2 PE=1 SV=2	1.312	0.4103	1.16559	1	1	0	0	0	0	0	0	0	0	0	0	0	0	0	1	1	0	0	0	0	0	0	0	0	0	0	0	0	0	0	0	0	0	0	0	0	0	0	0	0	0	0	0	0
MAP1B_HUMAN	Microtubule-associated protein 1B OS=Homo sapiens GN=MAP1B PE=1 SV=2	2.471	0.7588	0.247102	3	3	2	0	0	0	4	4	3	0	0	0	0	0	0	0	0	0	0	0	0	1	1	1	1	1	1	0	0	0	0	0	0	1	1	1	0	0	0	0	0	0	0	0	0
TBB4B_HUMAN	Tubulin beta-4B chain OS=Homo sapiens GN=TUBB4B PE=1 SV=1	3.788	0.7757	0.00026	49	19	1	71	17	1	59	24	1	44	17	1	34	11	1	38	14	1	35	9	1	33	11	1	40	16	1	46	11	1	25	10	1	37	13	1	45	14	1	30	8	1	28	9	1
TS101_HUMAN	Tumor susceptibility gene 101 protein OS=Homo sapiens GN=TSG101 PE=1 SV=2	2.077	0.5475	0.037613	1	1	1	0	0	0	1	1	1	0	0	0	0	0	0	0	0	0	0	0	0	0	0	0	1	1	1	0	0	0	0	0	0	1	1	1	1	1	1	0	0	0	0	0	0
UBE2S_HUMAN	Ubiquitin-conjugating enzyme E2 S OS=Homo sapiens GN=UBE2S PE=1 SV=2	2.123	0.6081	0.730131	0	0	0	0	0	0	0	0	0	0	0	0	0	0	0	1	1	1	0	0	0	0	0	0	0	0	0	0	0	0	0	0	0	0	0	0	0	0	0	0	0	0	0	0	0
PRDX1_HUMAN	Peroxiredoxin-1 OS=Homo sapiens GN=PRDX1 PE=1 SV=1	3.547	0.7509	0.007783	24	12	9	27	12	9	28	14	11	30	11	8	32	10	7	31	12	9	57	9	6	34	10	7	31	11	8	49	12	9	25	11	8	30	12	9	46	13	10	37	9	6	30	11	8
G3BP2_HUMAN	Ras GTPase-activating protein-binding protein 2 OS=Homo sapiens GN=G3BP2 PE=1 SV=2	3.243	0.6064	0.019375	2	2	2	1	1	1	2	2	2	2	2	2	1	1	1	5	4	4	0	0	0	0	0	0	1	1	1	1	1	1	0	0	0	1	1	1	1	1	1	1	1	1	1	1	1
NUP93_HUMAN	Nuclear pore complex protein Nup93 OS=Homo sapiens GN=NUP93 PE=1 SV=2	2.538	0.7187	0.003978	8	8	8	3	3	3	3	3	3	3	3	3	1	1	1	2	2	2	0	0	0	0	0	0	1	1	1	2	2	2	0	0	0	0	0	0	2	2	2	0	0	0	0	0	0
H2AW_HUMAN	Core histone macro-H2A.2 OS=Homo sapiens GN=H2AFY2 PE=1 SV=3	1.5	0.362	0.112917	0	0	0	0	0	0	0	0	0	1	1	0	0	0	0	1	1	0	0	0	0	0	0	0	1	1	0	0	0	0	0	0	0	0	0	0	0	0	0	0	0	0	0	0	0
COPZ1_HUMAN	Coatomer subunit zeta-1 OS=Homo sapiens GN=COPZ1 PE=1 SV=1	2.037	0.5893	0.176225	2	2	2	0	0	0	0	0	0	0	0	0	0	0	0	0	0	0	0	0	0	0	0	0	0	0	0	0	0	0	0	0	0	0	0	0	1	1	1	0	0	0	0	0	0
TPIS_HUMAN	Triosephosphate isomerase OS=Homo sapiens GN=TPI1 PE=1 SV=3	3.514	0.7455	0.000269	15	10	10	5	4	4	11	10	10	14	9	9	8	5	5	14	8	8	7	4	4	6	4	4	11	8	8	8	5	5	5	3	3	7	5	5	14	8	8	5	3	3	7	4	4
1C07_HUMAN	HLA class I histocompatibility antigen, Cw-7 alpha chain OS=Homo sapiens GN=HLA-C PE=1 SV=3	2.621	0.7085	0.423033	1	1	0	0	0	0	1	1	0	0	0	0	0	0	0	0	0	0	0	0	0	0	0	0	0	0	0	0	0	0	0	0	0	0	0	0	0	0	0	0	0	0	0	0	0
AT2A2_HUMAN	Sarcoplasmic/endoplasmic reticulum calcium ATPase 2 OS=Homo sapiens GN=ATP2A2 PE=1 SV=1	2.922	0.702	0.004084	14	14	8	3	3	3	10	10	8	9	9	6	5	5	3	9	9	6	1	1	0	6	6	4	10	10	5	2	2	2	3	3	3	6	6	3	10	10	6	5	5	4	5	5	2
NUP54_HUMAN	Nucleoporin p54 OS=Homo sapiens GN=NUP54 PE=1 SV=2	1.366	0.1801	0.915846	1	1	1	0	0	0	0	0	0	0	0	0	0	0	0	0	0	0	0	0	0	0	0	0	0	0	0	0	0	0	0	0	0	0	0	0	0	0	0	0	0	0	0	0	0
TFAM_HUMAN	Transcription factor A, mitochondrial OS=Homo sapiens GN=TFAM PE=1 SV=1	1.881	0.6502	0.117199	0	0	0	0	0	0	1	1	1	0	0	0	1	1	1	1	1	1	0	0	0	0	0	0	1	1	1	0	0	0	0	0	0	0	0	0	0	0	0	0	0	0	0	0	0
M3K4_HUMAN	Mitogen-activated protein kinase kinase kinase 4 OS=Homo sapiens GN=MAP3K4 PE=1 SV=2	1.246	0.2424	1.01012	0	0	0	0	0	0	0	0	0	0	0	0	0	0	0	0	0	0	0	0	0	0	0	0	0	0	0	0	0	0	0	0	0	0	0	0	0	0	0	0	0	0	0	0	0
RS15_HUMAN	40S ribosomal protein S15 OS=Homo sapiens GN=RPS15 PE=1 SV=2	3.32	0.596	0.098109	3	3	3	1	1	1	2	2	2	4	3	3	1	1	1	4	3	3	0	0	0	0	0	0	2	1	1	1	1	1	0	0	0	0	0	0	2	2	2	0	0	0	2	1	1
URFB1_HUMAN	UHRF1-binding protein 1 OS=Homo sapiens GN=UHRF1BP1 PE=1 SV=1	1.498	0.2168	3.0961	0	0	0	0	0	0	0	0	0	0	0	0	0	0	0	0	0	0	0	0	0	1	1	1	0	0	0	0	0	0	0	0	0	0	0	0	0	0	0	0	0	0	0	0	0
MY18B_HUMAN	Unconventional myosin-XVIIIb OS=Homo sapiens GN=MYO18B PE=1 SV=1	1.721	0.4364	1.57813	0	0	0	0	0	0	0	0	0	0	0	0	0	0	0	0	0	0	0	0	0	0	0	0	0	0	0	0	0	0	0	0	0	0	0	0	0	0	0	0	0	0	0	0	0
NDST1_HUMAN	Bifunctional heparan sulfate N-deacetylase/N-sulfotransferase 1 OS=Homo sapiens GN=NDST1 PE=1 SV=1	1.532	0.218	1.91147	1	1	1	0	0	0	0	0	0	0	0	0	0	0	0	0	0	0	0	0	0	0	0	0	0	0	0	0	0	0	0	0	0	0	0	0	0	0	0	0	0	0	0	0	0
PSMD1_HUMAN	26S proteasome non-ATPase regulatory subunit 1 OS=Homo sapiens GN=PSMD1 PE=1 SV=2	2.807	0.6706	0.001631	13	13	13	5	5	5	9	9	9	3	3	3	2	2	2	2	2	2	1	1	1	1	1	1	3	3	3	0	0	0	1	1	1	2	2	2	0	0	0	0	0	0	3	3	3
SNW1_HUMAN	SNW domain-containing protein 1 OS=Homo sapiens GN=SNW1 PE=1 SV=1	2.167	0.5754	0.432378	0	0	0	0	0	0	1	1	1	1	1	1	0	0	0	0	0	0	0	0	0	0	0	0	0	0	0	1	1	1	0	0	0	0	0	0	1	1	1	0	0	0	0	0	0
MTA1_HUMAN	Metastasis-associated protein MTA1 OS=Homo sapiens GN=MTA1 PE=1 SV=2	1.363	0.1981	1.04049	1	1	0	0	0	0	0	0	0	0	0	0	0	0	0	0	0	0	0	0	0	0	0	0	0	0	0	0	0	0	0	0	0	0	0	0	0	0	0	0	0	0	0	0	0
F74A7_HUMAN	Protein FAM74A7 OS=Homo sapiens GN=FAM74A7 PE=3 SV=3	1.009	0.1754	0.422881	1	1	0	0	0	0	0	0	0	0	0	0	0	0	0	0	0	0	0	0	0	0	0	0	0	0	0	0	0	0	0	0	0	0	0	0	0	0	0	0	0	0	0	0	0
RL10L_HUMAN	60S ribosomal protein L10-like OS=Homo sapiens GN=RPL10L PE=1 SV=3	2.424	0.5363	0.22831	1	1	0	1	1	0	0	0	0	2	2	0	2	2	0	3	2	0	0	0	0	2	2	0	2	2	0	2	2	0	1	1	0	2	2	0	1	1	0	0	0	0	0	0	0
FERM2_HUMAN	Fermitin family homolog 2 OS=Homo sapiens GN=FERMT2 PE=1 SV=1	1.537	0.3513	0.219239	1	1	1	0	0	0	1	1	1	0	0	0	0	0	0	0	0	0	0	0	0	0	0	0	0	0	0	0	0	0	0	0	0	0	0	0	0	0	0	0	0	0	0	0	0
SRBD1_HUMAN	S1 RNA-binding domain-containing protein 1 OS=Homo sapiens GN=SRBD1 PE=1 SV=2	1.056	0.2614	0.645877	0	0	0	0	0	0	0	0	0	0	0	0	0	0	0	0	0	0	0	0	0	0	0	0	0	0	0	0	0	0	0	0	0	0	0	0	1	1	1	0	0	0	0	0	0
MATR3_HUMAN	Matrin-3 OS=Homo sapiens GN=MATR3 PE=1 SV=2	3.775	0.7778	0.008646	23	20	20	15	12	12	19	16	16	21	18	18	10	10	10	21	17	17	10	9	9	10	9	9	24	19	19	14	12	12	8	7	7	16	14	14	16	14	14	7	7	7	10	9	9
KRT83_HUMAN	Keratin, type II cuticular Hb3 OS=Homo sapiens GN=KRT83 PE=1 SV=2	2.792	0.6699	0.005122	0	0	0	0	0	0	11	9	0	13	11	0	4	4	0	1	1	0	1	1	0	7	7	0	1	1	0	5	5	0	2	2	0	2	2	0	0	0	0	0	0	0	1	1	0
AXA2L_HUMAN	Putative annexin A2-like protein OS=Homo sapiens GN=ANXA2P2 PE=5 SV=2	3.597	0.7603	0.000507	20	16	0	8	8	0	17	16	0	19	13	0	9	8	0	15	11	0	13	7	0	9	7	0	11	9	0	15	10	0	4	4	0	10	8	0	19	12	0	9	7	0	10	7	0
CHM1A_HUMAN	Charged multivesicular body protein 1a OS=Homo sapiens GN=CHMP1A PE=1 SV=1	1.674	0.3701	0.222743	1	1	1	0	0	0	0	0	0	0	0	0	0	0	0	0	0	0	1	1	1	0	0	0	1	1	1	1	1	1	0	0	0	1	1	1	0	0	0	2	2	2	1	1	1
PCBP1_HUMAN	Poly(rC)-binding protein 1 OS=Homo sapiens GN=PCBP1 PE=1 SV=2	3.081	0.7656	0.026239	10	9	4	7	6	2	11	9	4	8	7	2	6	5	3	7	6	3	5	4	2	5	4	2	8	7	4	7	6	2	5	4	2	6	5	3	9	8	3	4	3	2	4	3	2
ZN207_HUMAN	Zinc finger protein 207 OS=Homo sapiens GN=ZNF207 PE=1 SV=1	1.898	0.6628	0.0182	1	1	1	0	0	0	0	0	0	1	1	1	0	0	0	1	1	1	0	0	0	0	0	0	1	1	1	0	0	0	0	0	0	0	0	0	0	0	0	0	0	0	0	0	0
NHRF1_HUMAN	Na(+)/H(+) exchange regulatory cofactor NHE-RF1 OS=Homo sapiens GN=SLC9A3R1 PE=1 SV=4	1.355	0.3638	0.188039	0	0	0	0	0	0	0	0	0	0	0	0	0	0	0	0	0	0	0	0	0	0	0	0	0	0	0	0	0	0	0	0	0	0	0	0	0	0	0	0	0	0	0	0	0
SRP72_HUMAN	Signal recognition particle 72 kDa protein OS=Homo sapiens GN=SRP72 PE=1 SV=3	1.768	0.6331	0.025549	0	0	0	0	0	0	0	0	0	1	1	1	1	1	1	2	2	2	0	0	0	1	1	1	0	0	0	0	0	0	0	0	0	1	1	1	0	0	0	0	0	0	0	0	0
OPA1_HUMAN	Dynamin-like 120 kDa protein, mitochondrial OS=Homo sapiens GN=OPA1 PE=1 SV=3	2.099	0.6817	0.025373	0	0	0	0	0	0	2	2	2	1	1	1	0	0	0	1	1	1	0	0	0	1	1	1	3	3	3	0	0	0	0	0	0	0	0	0	0	0	0	0	0	0	1	1	1
EPN4_HUMAN	Clathrin interactor 1 OS=Homo sapiens GN=CLINT1 PE=1 SV=1	2.235	0.5553	0.347617	1	1	1	0	0	0	1	1	1	0	0	0	0	0	0	0	0	0	0	0	0	0	0	0	0	0	0	0	0	0	0	0	0	0	0	0	0	0	0	0	0	0	0	0	0
NPM3_HUMAN	Nucleoplasmin-3 OS=Homo sapiens GN=NPM3 PE=1 SV=3	3.747	0.6814	0.009271	1	1	1	0	0	0	1	1	1	0	0	0	0	0	0	0	0	0	0	0	0	0	0	0	0	0	0	0	0	0	0	0	0	0	0	0	0	0	0	0	0	0	0	0	0
HSP7E_HUMAN	Heat shock 70 kDa protein 14 OS=Homo sapiens GN=HSPA14 PE=1 SV=1	1.332	0.4625	0.683514	0	0	0	0	0	0	0	0	0	0	0	0	0	0	0	0	0	0	0	0	0	0	0	0	0	0	0	0	0	0	0	0	0	0	0	0	0	0	0	0	0	0	0	0	0
UBF1_HUMAN	Nucleolar transcription factor 1 OS=Homo sapiens GN=UBTF PE=1 SV=1	1.406	0.4218	0.336021	0	0	0	0	0	0	0	0	0	0	0	0	0	0	0	0	0	0	0	0	0	0	0	0	1	1	1	0	0	0	0	0	0	0	0	0	0	0	0	0	0	0	0	0	0
H2BFS_HUMAN	Histone H2B type F-S OS=Homo sapiens GN=H2BFS PE=1 SV=2	3.498	0.7264	0.002242	4	3	0	5	3	0	9	4	0	46	7	0	28	5	0	34	7	0	20	3	0	32	4	0	63	7	0	10	3	0	1	1	0	39	6	0	18	4	0	4	3	0	3	2	0
CPSM_HUMAN	Carbamoyl-phosphate synthase [ammonia], mitochondrial OS=Homo sapiens GN=CPS1 PE=1 SV=2	3.789	0.792	0.000468	67	50	46	32	28	25	67	53	50	70	47	44	35	30	27	64	43	40	24	20	19	38	26	23	61	45	42	50	33	30	23	19	19	50	36	33	61	37	34	25	23	22	34	24	21
IMUP_HUMAN	Immortalization up-regulated protein OS=Homo sapiens GN=IMUP PE=1 SV=1	1.698	0.5405	0.048688	1	1	1	0	0	0	0	0	0	1	1	1	0	0	0	1	1	1	1	1	1	0	0	0	0	0	0	0	0	0	1	1	1	0	0	0	1	1	1	0	0	0	0	0	0
TCPW_HUMAN	T-complex protein 1 subunit zeta-2 OS=Homo sapiens GN=CCT6B PE=1 SV=5	2.725	0.6466	0.026447	5	5	0	1	1	0	5	5	0	4	3	0	4	4	0	5	5	0	1	1	0	2	2	0	2	2	0	2	2	0	2	2	0	3	3	0	5	4	0	2	2	0	2	2	0
LV206_HUMAN	Ig lambda chain V-II region MGC OS=Homo sapiens PE=1 SV=1	1.952	0.3827	0.135397	0	0	0	1	1	0	0	0	0	0	0	0	0	0	0	0	0	0	0	0	0	0	0	0	0	0	0	0	0	0	0	0	0	0	0	0	0	0	0	0	0	0	0	0	0
SNRPA_HUMAN	U1 small nuclear ribonucleoprotein A OS=Homo sapiens GN=SNRPA PE=1 SV=3	2.016	0.4057	0.013491	3	3	1	2	2	1	1	1	1	4	4	2	3	3	2	4	4	2	2	2	1	2	2	2	5	5	3	1	1	0	1	1	0	2	2	1	2	2	1	2	2	1	3	3	2
TAXB1_HUMAN	Tax1-binding protein 1 OS=Homo sapiens GN=TAX1BP1 PE=1 SV=2	2.576	0.6353	0.001001	11	11	11	6	6	6	8	7	7	0	0	0	0	0	0	0	0	0	0	0	0	0	0	0	0	0	0	0	0	0	0	0	0	0	0	0	0	0	0	0	0	0	0	0	0
TPP2_HUMAN	Tripeptidyl-peptidase 2 OS=Homo sapiens GN=TPP2 PE=1 SV=4	2.16	0.5222	0.049495	2	2	2	0	0	0	2	2	2	1	1	1	0	0	0	2	2	2	0	0	0	0	0	0	1	1	1	0	0	0	0	0	0	0	0	0	1	1	1	0	0	0	0	0	0
ATPO_HUMAN	ATP synthase subunit O, mitochondrial OS=Homo sapiens GN=ATP5O PE=1 SV=1	2.206	0.7017	0.005569	2	2	2	0	0	0	0	0	0	0	0	0	0	0	0	1	1	1	0	0	0	0	0	0	0	0	0	0	0	0	0	0	0	1	1	1	1	1	1	0	0	0	1	1	1
SCAM3_HUMAN	Secretory carrier-associated membrane protein 3 OS=Homo sapiens GN=SCAMP3 PE=1 SV=3	2.474	0.669	0.148722	1	1	1	0	0	0	1	1	1	1	1	1	0	0	0	2	2	2	0	0	0	0	0	0	0	0	0	0	0	0	0	0	0	0	0	0	0	0	0	0	0	0	0	0	0
SPAT2_HUMAN	Spermatogenesis-associated protein 2 OS=Homo sapiens GN=SPATA2 PE=1 SV=2	1.213	0.2218	0.144444	0	0	0	0	0	0	0	0	0	0	0	0	0	0	0	0	0	0	0	0	0	0	0	0	0	0	0	0	0	0	0	0	0	0	0	0	0	0	0	0	0	0	0	0	0
TCOF_HUMAN	Treacle protein OS=Homo sapiens GN=TCOF1 PE=1 SV=3	2.993	0.653	0.000363	5	5	5	1	1	1	5	5	5	7	7	7	4	4	4	8	8	8	2	2	2	4	4	4	6	6	6	2	2	2	1	1	1	3	3	3	4	4	4	1	1	1	4	4	4
NSF_HUMAN	Vesicle-fusing ATPase OS=Homo sapiens GN=NSF PE=1 SV=3	2.128	0.6734	0.167264	2	2	2	0	0	0	2	2	2	2	2	2	1	1	1	1	1	1	0	0	0	0	0	0	1	1	1	1	1	1	0	0	0	2	2	2	0	0	0	0	0	0	1	1	1
USP9Y_HUMAN	Probable ubiquitin carboxyl-terminal hydrolase FAF-Y OS=Homo sapiens GN=USP9Y PE=1 SV=2	1.215	0.1687	1.49887	0	0	0	0	0	0	0	0	0	1	1	0	0	0	0	0	0	0	0	0	0	0	0	0	0	0	0	0	0	0	0	0	0	0	0	0	0	0	0	0	0	0	0	0	0
PDLI5_HUMAN	PDZ and LIM domain protein 5 OS=Homo sapiens GN=PDLIM5 PE=1 SV=5	2.075	0.5865	0.449648	3	3	3	0	0	0	3	3	3	0	0	0	0	0	0	0	0	0	0	0	0	1	1	1	1	1	1	0	0	0	0	0	0	0	0	0	0	0	0	0	0	0	1	1	1
HTAI2_HUMAN	Oxidoreductase HTATIP2 OS=Homo sapiens GN=HTATIP2 PE=1 SV=2	1.954	0.5246	0.076412	1	1	1	0	0	0	1	1	1	1	1	1	0	0	0	0	0	0	0	0	0	0	0	0	1	1	1	0	0	0	0	0	0	0	0	0	0	0	0	0	0	0	0	0	0
ROCK2_HUMAN	Rho-associated protein kinase 2 OS=Homo sapiens GN=ROCK2 PE=1 SV=4	1.931	0.6395	0.060815	2	2	2	0	0	0	0	0	0	2	2	2	1	1	1	3	3	3	0	0	0	0	0	0	1	1	1	1	1	1	1	1	1	0	0	0	1	1	1	0	0	0	0	0	0
HGB1A_HUMAN	Putative high mobility group protein B1-like 1 OS=Homo sapiens GN=HMGB1P1 PE=5 SV=1	2.788	0.5613	0.001065	3	3	0	0	0	0	2	2	0	1	1	0	1	1	0	2	2	0	0	0	0	2	2	0	1	1	0	1	1	0	0	0	0	2	2	0	0	0	0	0	0	0	1	1	0
MP2K3_HUMAN	Dual specificity mitogen-activated protein kinase kinase 3 OS=Homo sapiens GN=MAP2K3 PE=1 SV=2	1.522	0.6386	0.25324	1	1	1	0	0	0	1	1	0	0	0	0	1	1	0	0	0	0	0	0	0	0	0	0	1	1	0	1	1	0	0	0	0	2	2	0	0	0	0	0	0	0	0	0	0
TCPZ_HUMAN	T-complex protein 1 subunit zeta OS=Homo sapiens GN=CCT6A PE=1 SV=3	2.725	0.6466	0.000372	13	13	8	5	5	4	13	13	8	12	11	8	7	7	3	12	12	7	2	2	1	5	5	3	8	8	6	5	5	3	5	5	3	8	8	5	10	9	5	4	4	2	5	5	3
M4K4_HUMAN	Mitogen-activated protein kinase kinase kinase kinase 4 OS=Homo sapiens GN=MAP4K4 PE=1 SV=2	1.836	0.4532	0.94452	0	0	0	0	0	0	1	1	1	0	0	0	0	0	0	0	0	0	0	0	0	0	0	0	0	0	0	0	0	0	0	0	0	0	0	0	0	0	0	0	0	0	0	0	0
H2B1B_HUMAN	Histone H2B type 1-B OS=Homo sapiens GN=HIST1H2BB PE=1 SV=2	3.498	0.7264	0.002242	4	3	0	5	3	0	9	4	0	45	7	0	28	6	0	34	7	0	18	2	0	30	4	0	64	8	0	10	3	0	1	1	0	39	6	0	17	4	0	3	2	0	2	1	0
H2B1J_HUMAN	Histone H2B type 1-J OS=Homo sapiens GN=HIST1H2BJ PE=1 SV=3	3.498	0.7264	0.002242	4	3	0	5	3	0	9	4	0	45	7	0	28	6	0	34	7	0	18	2	0	30	4	0	64	8	0	10	3	0	1	1	0	39	6	0	17	4	0	3	2	0	2	1	0
H2B1O_HUMAN	Histone H2B type 1-O OS=Homo sapiens GN=HIST1H2BO PE=1 SV=3	3.498	0.7264	0.002242	4	3	0	5	3	0	9	4	0	45	7	0	28	6	0	34	7	0	18	2	0	30	4	0	64	8	0	10	3	0	1	1	0	39	6	0	17	4	0	3	2	0	2	1	0
H2B2E_HUMAN	Histone H2B type 2-E OS=Homo sapiens GN=HIST2H2BE PE=1 SV=3	3.498	0.7264	0.002242	4	3	0	5	3	0	9	4	0	45	7	0	28	6	0	34	7	0	18	2	0	30	4	0	64	8	0	10	3	0	1	1	0	39	6	0	17	4	0	3	2	0	2	1	0
PPAC_HUMAN	Low molecular weight phosphotyrosine protein phosphatase OS=Homo sapiens GN=ACP1 PE=1 SV=3	2.818	0.7814	0.027228	7	5	5	2	2	2	4	4	4	6	5	5	1	1	1	4	4	4	0	0	0	0	0	0	4	4	4	2	1	1	0	0	0	2	2	2	2	1	1	0	0	0	0	0	0
F10A1_HUMAN	Hsc70-interacting protein OS=Homo sapiens GN=ST13 PE=1 SV=2	3.386	0.7431	0.006886	4	4	0	1	1	0	7	7	0	3	3	0	3	3	0	6	6	0	1	1	0	0	0	0	4	4	0	3	3	0	1	1	0	2	2	0	6	5	0	1	1	0	2	2	0
PABP1_HUMAN	Polyadenylate-binding protein 1 OS=Homo sapiens GN=PABPC1 PE=1 SV=2	3.129	0.7231	0.003335	18	17	3	7	7	0	16	16	1	15	14	2	9	9	1	15	13	1	2	2	0	6	6	0	14	13	1	8	8	1	7	7	0	14	12	1	11	10	1	4	4	0	7	6	0
RL11_HUMAN	60S ribosomal protein L11 OS=Homo sapiens GN=RPL11 PE=1 SV=2	3.083	0.7292	0.000636	4	2	2	3	2	2	5	3	3	10	6	6	4	2	2	5	4	4	4	3	3	5	2	2	5	2	2	8	2	2	3	2	2	6	2	2	8	2	2	1	1	1	5	2	2
RUVB2_HUMAN	RuvB-like 2 OS=Homo sapiens GN=RUVBL2 PE=1 SV=3	2.846	0.7245	0.005056	7	7	7	5	5	5	7	7	7	6	6	6	3	3	3	6	6	6	0	0	0	3	3	3	5	5	5	2	2	2	2	2	2	4	4	4	4	4	4	3	3	3	2	2	2
CO8G_HUMAN	Complement component C8 gamma chain OS=Homo sapiens GN=C8G PE=1 SV=3	1.321	0.2301	0.087713	0	0	0	0	0	0	1	1	1	0	0	0	0	0	0	0	0	0	0	0	0	0	0	0	0	0	0	0	0	0	0	0	0	0	0	0	0	0	0	0	0	0	0	0	0
SPB5_HUMAN	Serpin B5 OS=Homo sapiens GN=SERPINB5 PE=1 SV=2	2.158	0.6208	0.001326	1	1	1	1	1	1	0	0	0	1	1	1	0	0	0	1	1	1	0	0	0	0	0	0	0	0	0	1	1	1	1	1	1	0	0	0	1	1	1	0	0	0	0	0	0
SNX2_HUMAN	Sorting nexin-2 OS=Homo sapiens GN=SNX2 PE=1 SV=2	2.612	0.6232	0.033096	4	4	4	1	1	1	1	1	0	1	1	1	0	0	0	1	1	0	0	0	0	1	1	1	2	2	1	0	0	0	0	0	0	0	0	0	1	1	1	0	0	0	1	1	1
FILA2_HUMAN	Filaggrin-2 OS=Homo sapiens GN=FLG2 PE=1 SV=1	6.635	0.8353	0.019655	3	3	3	0	0	0	4	4	4	7	6	6	7	6	6	6	5	5	1	1	1	2	2	2	3	3	3	3	3	3	5	4	4	4	4	4	4	4	4	6	6	6	1	1	1
XRCC6_HUMAN	X-ray repair cross-complementing protein 6 OS=Homo sapiens GN=XRCC6 PE=1 SV=2	4.08	0.7931	0.000364	15	13	13	2	2	2	11	11	11	23	19	18	12	12	12	14	13	13	6	6	6	10	10	10	19	16	16	6	6	6	3	3	3	9	9	9	9	9	9	2	2	2	4	4	4
FUS_HUMAN	RNA-binding protein FUS OS=Homo sapiens GN=FUS PE=1 SV=1	4.944	0.7399	0.002328	7	5	4	1	1	0	5	4	3	8	6	4	3	2	1	4	4	3	2	1	0	1	1	0	6	4	3	5	4	2	1	1	0	4	2	1	6	4	2	2	2	1	2	2	1
ANM8_HUMAN	Protein arginine N-methyltransferase 8 OS=Homo sapiens GN=PRMT8 PE=1 SV=2	2.202	0.6116	0.037262	2	2	0	1	1	0	2	2	0	2	2	0	1	1	0	2	2	0	0	0	0	2	2	0	2	2	0	1	1	0	1	1	0	1	1	0	2	2	0	2	2	0	2	2	0
GOGA4_HUMAN	Golgin subfamily A member 4 OS=Homo sapiens GN=GOLGA4 PE=1 SV=1	2.676	0.6724	0.004674	15	15	15	11	11	11	16	16	16	22	22	22	11	11	11	9	9	9	9	9	9	10	10	10	18	18	18	18	18	18	11	11	11	9	9	9	25	25	25	6	6	6	16	16	16
HMGB1_HUMAN	High mobility group protein B1 OS=Homo sapiens GN=HMGB1 PE=1 SV=3	2.788	0.5656	0.001065	3	3	0	0	0	0	3	3	1	1	1	0	1	1	0	3	3	1	0	0	0	2	2	0	1	1	0	1	1	0	0	0	0	2	2	0	0	0	0	0	0	0	1	1	0
XCT_HUMAN	Cystine/glutamate transporter OS=Homo sapiens GN=SLC7A11 PE=1 SV=1	2.493	0.4903	0.686819	0	0	0	0	0	0	0	0	0	1	1	1	0	0	0	1	1	1	0	0	0	0	0	0	0	0	0	0	0	0	0	0	0	0	0	0	0	0	0	0	0	0	0	0	0
RLGPB_HUMAN	Ral GTPase-activating protein subunit beta OS=Homo sapiens GN=RALGAPB PE=1 SV=1	1.05	0.1829	1.22953	0	0	0	0	0	0	0	0	0	0	0	0	0	0	0	0	0	0	0	0	0	0	0	0	0	0	0	0	0	0	0	0	0	0	0	0	0	0	0	0	0	0	0	0	0
K0020_HUMAN	Pumilio domain-containing protein KIAA0020 OS=Homo sapiens GN=KIAA0020 PE=1 SV=3	1.335	0.2772	0.715197	0	0	0	0	0	0	0	0	0	0	0	0	0	0	0	0	0	0	0	0	0	0	0	0	1	1	1	0	0	0	0	0	0	0	0	0	0	0	0	0	0	0	0	0	0
1A33_HUMAN	HLA class I histocompatibility antigen, A-33 alpha chain OS=Homo sapiens GN=HLA-A PE=1 SV=3	2.621	0.7085	0.054574	1	1	0	1	1	0	2	2	0	0	0	0	0	0	0	1	1	0	0	0	0	0	0	0	0	0	0	0	0	0	0	0	0	0	0	0	1	1	0	1	1	0	0	0	0
SPB8_HUMAN	Serpin B8 OS=Homo sapiens GN=SERPINB8 PE=1 SV=2	2.325	0.5422	0.006663	3	3	2	0	0	0	2	2	1	1	1	0	1	1	0	2	2	1	0	0	0	1	1	0	0	0	0	1	1	0	0	0	0	1	1	0	1	1	0	0	0	0	1	1	0
AL3A2_HUMAN	Fatty aldehyde dehydrogenase OS=Homo sapiens GN=ALDH3A2 PE=1 SV=1	1.656	0.5978	0.20717	0	0	0	0	0	0	1	1	1	0	0	0	0	0	0	0	0	0	0	0	0	0	0	0	0	0	0	0	0	0	0	0	0	0	0	0	0	0	0	0	0	0	0	0	0
LTV1_HUMAN	Protein LTV1 homolog OS=Homo sapiens GN=LTV1 PE=1 SV=1	2.026	0.6323	0.449257	0	0	0	0	0	0	0	0	0	0	0	0	1	1	1	0	0	0	0	0	0	0	0	0	0	0	0	0	0	0	0	0	0	0	0	0	0	0	0	0	0	0	0	0	0
IBP7_HUMAN	Insulin-like growth factor-binding protein 7 OS=Homo sapiens GN=IGFBP7 PE=1 SV=1	1.839	0.4343	0.2046	0	0	0	0	0	0	0	0	0	1	1	1	0	0	0	0	0	0	0	0	0	0	0	0	0	0	0	2	2	2	1	1	1	1	1	1	1	1	1	0	0	0	0	0	0
BRE1A_HUMAN	E3 ubiquitin-protein ligase BRE1A OS=Homo sapiens GN=RNF20 PE=1 SV=2	2.043	0.5497	0.070654	0	0	0	0	0	0	1	1	1	2	2	2	0	0	0	0	0	0	0	0	0	0	0	0	2	2	2	0	0	0	0	0	0	1	1	1	0	0	0	0	0	0	0	0	0
TRPC1_HUMAN	Short transient receptor potential channel 1 OS=Homo sapiens GN=TRPC1 PE=1 SV=1	1.373	0.2171	0.315826	0	0	0	0	0	0	0	0	0	1	1	1	0	0	0	0	0	0	0	0	0	0	0	0	0	0	0	1	1	1	0	0	0	0	0	0	0	0	0	0	0	0	0	0	0
RL10_HUMAN	60S ribosomal protein L10 OS=Homo sapiens GN=RPL10 PE=1 SV=4	2.424	0.7374	0.223871	2	2	1	2	2	1	1	1	1	3	3	1	2	2	0	3	2	0	0	0	0	2	2	0	3	3	1	2	2	0	1	1	0	2	2	0	1	1	0	0	0	0	0	0	0
KAPCA_HUMAN	cAMP-dependent protein kinase catalytic subunit alpha OS=Homo sapiens GN=PRKACA PE=1 SV=2	1.623	0.4878	0.018292	0	0	0	0	0	0	0	0	0	1	1	0	0	0	0	1	1	0	0	0	0	0	0	0	0	0	0	0	0	0	0	0	0	0	0	0	1	1	0	0	0	0	0	0	0
PPM1G_HUMAN	Protein phosphatase 1G OS=Homo sapiens GN=PPM1G PE=1 SV=1	2.654	0.6902	0.002081	6	6	6	2	2	2	2	2	2	5	5	5	4	4	4	5	5	5	1	1	1	3	3	3	3	3	3	4	4	4	2	2	2	3	3	3	4	4	4	3	3	3	3	3	3
RL18_HUMAN	60S ribosomal protein L18 OS=Homo sapiens GN=RPL18 PE=1 SV=2	2.146	0.5741	0.006405	0	0	0	0	0	0	0	0	0	2	2	2	0	0	0	1	1	1	0	0	0	0	0	0	2	2	2	1	1	1	0	0	0	0	0	0	0	0	0	0	0	0	0	0	0
LIPS_HUMAN	Hormone-sensitive lipase OS=Homo sapiens GN=LIPE PE=1 SV=4	1.283	0.212	2.55177	0	0	0	0	0	0	0	0	0	0	0	0	0	0	0	0	0	0	0	0	0	1	1	1	0	0	0	1	1	1	0	0	0	0	0	0	0	0	0	0	0	0	0	0	0
MACF1_HUMAN	Microtubule-actin cross-linking factor 1, isoforms 1/2/3/5 OS=Homo sapiens GN=MACF1 PE=1 SV=4	1.938	0.3509	0.051958	0	0	0	1	1	0	0	0	0	0	0	0	0	0	0	0	0	0	0	0	0	0	0	0	0	0	0	0	0	0	0	0	0	0	0	0	0	0	0	0	0	0	0	0	0
MOES_HUMAN	Moesin OS=Homo sapiens GN=MSN PE=1 SV=3	3.679	0.7181	0.015347	31	29	20	5	5	2	23	22	15	27	22	14	19	18	12	25	23	12	11	11	9	13	12	10	14	12	7	15	14	11	11	11	6	16	14	8	26	20	14	10	9	7	12	12	7
TMX1_HUMAN	Thioredoxin-related transmembrane protein 1 OS=Homo sapiens GN=TMX1 PE=1 SV=1	1.975	0.4774	0.01083	1	1	1	0	0	0	0	0	0	0	0	0	0	0	0	1	1	1	0	0	0	0	0	0	0	0	0	0	0	0	0	0	0	0	0	0	1	1	1	0	0	0	0	0	0
HAT1_HUMAN	Histone acetyltransferase type B catalytic subunit OS=Homo sapiens GN=HAT1 PE=1 SV=1	1.508	0.5292	0.253339	2	2	2	0	0	0	0	0	0	1	1	1	0	0	0	0	0	0	0	0	0	0	0	0	1	1	1	0	0	0	0	0	0	0	0	0	0	0	0	0	0	0	0	0	0
RS4Y2_HUMAN	40S ribosomal protein S4, Y isoform 2 OS=Homo sapiens GN=RPS4Y2 PE=1 SV=3	2.638	0.5958	0.005678	5	5	0	1	1	0	1	1	0	9	6	0	2	2	0	3	3	0	1	1	0	1	1	0	4	4	0	4	4	0	0	0	0	3	3	0	3	3	0	0	0	0	1	1	0
RAB5A_HUMAN	Ras-related protein Rab-5A OS=Homo sapiens GN=RAB5A PE=1 SV=2	2.026	0.5948	0.026916	1	1	0	0	0	0	1	1	0	0	0	0	0	0	0	1	1	0	0	0	0	0	0	0	0	0	0	0	0	0	0	0	0	0	0	0	0	0	0	0	0	0	0	0	0
ECHB_HUMAN	Trifunctional enzyme subunit beta, mitochondrial OS=Homo sapiens GN=HADHB PE=1 SV=3	2.51	0.6578	0.004336	6	6	6	2	2	2	3	3	3	6	6	6	4	4	4	4	4	4	1	1	1	4	4	4	5	5	5	5	5	5	4	4	4	3	3	3	5	5	5	4	4	4	5	5	5
ARGI1_HUMAN	Arginase-1 OS=Homo sapiens GN=ARG1 PE=1 SV=2	3.742	0.6739	0.031987	0	0	0	0	0	0	0	0	0	1	1	1	1	1	1	1	1	1	1	1	1	1	1	1	0	0	0	0	0	0	2	2	2	1	1	1	1	1	1	0	0	0	0	0	0
CPSF7_HUMAN	Cleavage and polyadenylation specificity factor subunit 7 OS=Homo sapiens GN=CPSF7 PE=1 SV=1	2.036	0.6165	0.135058	3	3	3	1	1	1	2	2	2	1	1	1	1	1	1	1	1	1	0	0	0	0	0	0	1	1	1	0	0	0	0	0	0	0	0	0	0	0	0	0	0	0	0	0	0
TOR1B_HUMAN	Torsin-1B OS=Homo sapiens GN=TOR1B PE=1 SV=2	1.68	0.5369	1.44749	0	0	0	0	0	0	0	0	0	0	0	0	0	0	0	0	0	0	0	0	0	0	0	0	0	0	0	0	0	0	0	0	0	0	0	0	0	0	0	0	0	0	0	0	0
SERA_HUMAN	D-3-phosphoglycerate dehydrogenase OS=Homo sapiens GN=PHGDH PE=1 SV=4	3.661	0.7374	0.000579	9	8	8	6	6	6	10	9	9	13	10	10	5	5	5	10	9	9	5	4	4	5	5	5	9	8	8	9	7	7	2	2	2	9	9	9	9	9	9	4	4	4	4	4	4
PDIA2_HUMAN	Protein disulfide-isomerase A2 OS=Homo sapiens GN=PDIA2 PE=1 SV=2	1.425	0.1846	0.014134	0	0	0	0	0	0	0	0	0	0	0	0	0	0	0	0	0	0	0	0	0	0	0	0	0	0	0	0	0	0	0	0	0	0	0	0	1	1	0	0	0	0	0	0	0
K2C1_HUMAN	Keratin, type II cytoskeletal 1 OS=Homo sapiens GN=KRT1 PE=1 SV=6	6.151	0.769	0.000368	99	44	37	143	36	30	105	44	37	150	46	39	252	44	37	162	45	38	353	35	28	179	34	27	108	37	30	171	39	32	193	40	33	171	41	34	165	39	32	165	37	30	97	31	24
ITIH5_HUMAN	Inter-alpha-trypsin inhibitor heavy chain H5 OS=Homo sapiens GN=ITIH5 PE=2 SV=2	1.164	0.2978	0.479918	0	0	0	0	0	0	1	1	1	0	0	0	0	0	0	0	0	0	0	0	0	0	0	0	0	0	0	0	0	0	0	0	0	0	0	0	0	0	0	0	0	0	0	0	0
SNUT1_HUMAN	U4/U6.U5 tri-snRNP-associated protein 1 OS=Homo sapiens GN=SART1 PE=1 SV=1	1.727	0.4331	0.069302	0	0	0	0	0	0	0	0	0	0	0	0	0	0	0	0	0	0	0	0	0	0	0	0	1	1	1	0	0	0	0	0	0	0	0	0	0	0	0	0	0	0	0	0	0
EFCB5_HUMAN	EF-hand calcium-binding domain-containing protein 5 OS=Homo sapiens GN=EFCAB5 PE=1 SV=3	1.073	0.2088	0.529364	0	0	0	0	0	0	0	0	0	0	0	0	0	0	0	0	0	0	0	0	0	0	0	0	0	0	0	0	0	0	0	0	0	0	0	0	1	1	1	0	0	0	0	0	0
PDIA3_HUMAN	Protein disulfide-isomerase A3 OS=Homo sapiens GN=PDIA3 PE=1 SV=4	2.925	0.7887	0.00136	12	11	11	2	2	2	9	8	8	14	13	13	6	6	6	13	13	13	4	4	4	7	7	7	9	9	9	8	7	7	3	3	3	8	8	8	13	11	11	10	9	9	8	8	8
EIF3B_HUMAN	Eukaryotic translation initiation factor 3 subunit B OS=Homo sapiens GN=EIF3B PE=1 SV=3	3.168	0.7765	0.021199	13	12	12	9	9	9	13	13	13	11	10	10	6	6	6	8	8	8	2	2	2	7	7	7	11	11	11	4	4	4	1	1	1	6	6	6	8	7	7	2	2	2	5	5	5
CATA_HUMAN	Catalase OS=Homo sapiens GN=CAT PE=1 SV=3	2.886	0.738	0.025194	4	4	4	2	2	2	4	4	4	4	4	4	3	3	3	7	7	7	1	1	1	2	2	2	4	4	4	1	1	1	2	2	2	3	3	3	3	3	3	4	4	4	2	2	2
T2H2L_HUMAN	General transcription factor IIH subunit 2-like protein OS=Homo sapiens GN=GTF2H2C PE=2 SV=1	1.423	0.3935	0.460829	0	0	0	0	0	0	0	0	0	0	0	0	0	0	0	0	0	0	0	0	0	0	0	0	0	0	0	0	0	0	0	0	0	0	0	0	1	1	0	0	0	0	0	0	0
ANM5_HUMAN	Protein arginine N-methyltransferase 5 OS=Homo sapiens GN=PRMT5 PE=1 SV=4	2.703	0.7251	0.018709	5	5	5	2	2	2	2	2	2	7	7	7	2	2	2	3	3	3	0	0	0	0	0	0	3	3	3	2	2	2	0	0	0	0	0	0	4	4	4	0	0	0	1	1	1
PRKDC_HUMAN	DNA-dependent protein kinase catalytic subunit OS=Homo sapiens GN=PRKDC PE=1 SV=3	2.468	0.7419	0.009062	3	3	3	3	3	3	3	3	3	19	19	19	2	2	2	16	16	16	3	3	3	3	3	3	20	20	20	2	2	2	0	0	0	11	11	11	3	3	3	0	0	0	3	3	3
FKBP3_HUMAN	Peptidyl-prolyl cis-trans isomerase FKBP3 OS=Homo sapiens GN=FKBP3 PE=1 SV=1	2.39	0.6298	0.041097	3	3	3	0	0	0	1	1	1	3	3	3	2	2	2	1	1	1	1	1	1	1	1	1	1	1	1	2	2	2	1	1	1	1	1	1	2	2	2	1	1	1	1	1	1
TCPG_HUMAN	T-complex protein 1 subunit gamma OS=Homo sapiens GN=CCT3 PE=1 SV=4	2.779	0.7163	0.020404	12	12	12	6	5	5	13	11	11	10	9	9	3	3	3	12	11	11	2	2	2	1	1	1	6	6	6	3	3	3	1	1	1	4	4	4	7	7	7	1	1	1	1	1	1
AAAT_HUMAN	Neutral amino acid transporter B(0) OS=Homo sapiens GN=SLC1A5 PE=1 SV=2	2.874	0.7774	0.000332	2	2	2	1	1	1	3	3	3	3	3	3	2	2	2	2	2	2	0	0	0	1	1	1	3	3	3	2	2	2	1	1	1	2	2	2	3	3	3	2	2	2	1	1	1
ANM1_HUMAN	Protein arginine N-methyltransferase 1 OS=Homo sapiens GN=PRMT1 PE=1 SV=2	3.103	0.6319	0.037262	3	3	1	2	2	1	4	4	2	2	2	0	1	1	0	3	3	1	0	0	0	2	2	0	2	2	0	1	1	0	1	1	0	1	1	0	2	2	0	2	2	0	3	3	1
RPAB3_HUMAN	DNA-directed RNA polymerases I, II, and III subunit RPABC3 OS=Homo sapiens GN=POLR2H PE=1 SV=4	3.007	0.7177	0.039416	2	2	2	1	1	1	1	1	1	1	1	1	1	1	1	0	0	0	0	0	0	0	0	0	0	0	0	1	1	1	0	0	0	0	0	0	1	1	1	1	1	1	1	1	1
PDIA1_HUMAN	Protein disulfide-isomerase OS=Homo sapiens GN=P4HB PE=1 SV=3	3.76	0.7724	0.000516	15	15	15	6	6	6	14	14	14	16	15	15	12	11	11	21	18	18	5	5	5	11	11	11	14	14	14	8	8	8	5	5	5	10	10	10	19	16	15	8	8	8	10	10	10
PITH1_HUMAN	PITH domain-containing protein 1 OS=Homo sapiens GN=PITHD1 PE=1 SV=1	2.254	0.555	0.116472	1	1	1	0	0	0	0	0	0	2	2	2	0	0	0	0	0	0	0	0	0	0	0	0	0	0	0	0	0	0	0	0	0	0	0	0	1	1	1	0	0	0	0	0	0
CL029_HUMAN	Uncharacterized protein C12orf29 OS=Homo sapiens GN=C12orf29 PE=1 SV=2	1.189	0.4516	0.83015	0	0	0	0	0	0	0	0	0	0	0	0	0	0	0	0	0	0	0	0	0	0	0	0	0	0	0	0	0	0	0	0	0	0	0	0	0	0	0	0	0	0	0	0	0
DHE3_HUMAN	Glutamate dehydrogenase 1, mitochondrial OS=Homo sapiens GN=GLUD1 PE=1 SV=2	3.008	0.7034	0.000551	12	12	2	1	1	1	9	9	2	8	8	2	4	4	1	7	7	1	1	1	0	2	2	1	6	6	1	4	4	1	4	4	1	5	5	1	6	6	1	1	1	0	5	5	1
CHST5_HUMAN	Carbohydrate sulfotransferase 5 OS=Homo sapiens GN=CHST5 PE=2 SV=3	1.236	0.1343	1.20172	0	0	0	0	0	0	0	0	0	0	0	0	0	0	0	0	0	0	0	0	0	0	0	0	0	0	0	0	0	0	0	0	0	0	0	0	0	0	0	0	0	0	0	0	0
U2AF2_HUMAN	Splicing factor U2AF 65 kDa subunit OS=Homo sapiens GN=U2AF2 PE=1 SV=4	1.5	0.2693	0.951679	0	0	0	0	0	0	0	0	0	1	1	1	0	0	0	1	1	1	1	1	1	1	1	1	0	0	0	0	0	0	0	0	0	1	1	1	0	0	0	0	0	0	0	0	0
TWF2_HUMAN	Twinfilin-2 OS=Homo sapiens GN=TWF2 PE=1 SV=2	1.793	0.5777	0.035312	1	1	1	0	0	0	0	0	0	1	1	1	0	0	0	1	1	0	0	0	0	0	0	0	0	0	0	1	1	0	0	0	0	0	0	0	1	1	0	0	0	0	0	0	0
IDH3A_HUMAN	Isocitrate dehydrogenase [NAD] subunit alpha, mitochondrial OS=Homo sapiens GN=IDH3A PE=1 SV=1	2.06	0.5144	0.032286	1	1	1	0	0	0	2	2	2	2	2	2	1	1	1	3	3	3	0	0	0	1	1	1	1	1	1	2	2	2	1	1	1	2	2	2	1	1	1	3	3	3	2	2	2
APMAP_HUMAN	Adipocyte plasma membrane-associated protein OS=Homo sapiens GN=APMAP PE=1 SV=2	1.648	0.4108	0.022833	0	0	0	0	0	0	0	0	0	0	0	0	0	0	0	1	1	1	0	0	0	0	0	0	0	0	0	0	0	0	0	0	0	0	0	0	0	0	0	0	0	0	0	0	0
NDKA_HUMAN	Nucleoside diphosphate kinase A OS=Homo sapiens GN=NME1 PE=1 SV=1	3.927	0.7383	0.000211	12	8	4	4	4	1	10	8	5	10	6	3	7	4	2	8	5	3	2	2	1	4	2	1	5	3	2	6	3	1	5	4	2	5	3	2	11	5	2	3	2	1	3	2	1
DHPR_HUMAN	Dihydropteridine reductase OS=Homo sapiens GN=QDPR PE=1 SV=2	1.898	0.5063	0.741671	0	0	0	0	0	0	0	0	0	0	0	0	0	0	0	0	0	0	0	0	0	0	0	0	0	0	0	0	0	0	0	0	0	0	0	0	0	0	0	0	0	0	0	0	0
DSC3_HUMAN	Desmocollin-3 OS=Homo sapiens GN=DSC3 PE=1 SV=3	1.899	0.436	0.058231	0	0	0	0	0	0	0	0	0	0	0	0	0	0	0	0	0	0	0	0	0	0	0	0	0	0	0	0	0	0	0	0	0	0	0	0	0	0	0	0	0	0	0	0	0
DPOA2_HUMAN	DNA polymerase alpha subunit B OS=Homo sapiens GN=POLA2 PE=1 SV=2	2.331	0.4927	0.210488	0	0	0	1	1	1	1	1	1	0	0	0	1	1	1	0	0	0	0	0	0	1	1	1	1	1	1	0	0	0	0	0	0	1	1	1	1	1	1	1	1	1	1	1	1
VIME_HUMAN	Vimentin OS=Homo sapiens GN=VIM PE=1 SV=4	3.865	0.8015	0.001237	53	37	30	36	27	21	53	38	32	53	34	27	40	29	23	49	32	25	38	17	14	30	19	15	71	36	29	58	30	23	34	25	20	62	31	24	45	30	23	28	18	14	39	21	17
GNAS2_HUMAN	Guanine nucleotide-binding protein G(s) subunit alpha isoforms short OS=Homo sapiens GN=GNAS PE=1 SV=1	2.329	0.5987	0.003423	2	2	0	1	1	0	0	0	0	1	1	0	0	0	0	1	1	0	0	0	0	0	0	0	0	0	0	0	0	0	0	0	0	0	0	0	1	1	0	0	0	0	0	0	0
CN166_HUMAN	UPF0568 protein C14orf166 OS=Homo sapiens GN=C14orf166 PE=1 SV=1	1.874	0.4152	0.305604	2	2	2	0	0	0	0	0	0	0	0	0	0	0	0	0	0	0	1	1	1	0	0	0	0	0	0	0	0	0	0	0	0	0	0	0	0	0	0	0	0	0	0	0	0
TFR1_HUMAN	Transferrin receptor protein 1 OS=Homo sapiens GN=TFRC PE=1 SV=2	2.966	0.7896	0.001103	16	16	15	9	9	9	15	15	15	11	11	11	6	6	6	10	10	9	3	3	3	4	4	4	10	10	10	4	4	4	3	3	3	6	6	5	8	8	8	5	5	5	7	7	7
MESD_HUMAN	LDLR chaperone MESD OS=Homo sapiens GN=MESDC2 PE=1 SV=2	1.555	0.4662	0.735797	0	0	0	0	0	0	0	0	0	0	0	0	0	0	0	0	0	0	0	0	0	0	0	0	0	0	0	0	0	0	0	0	0	0	0	0	1	1	1	0	0	0	0	0	0
RGPD3_HUMAN	RanBP2-like and GRIP domain-containing protein 3 OS=Homo sapiens GN=RGPD3 PE=2 SV=2	1.794	0.6805	0.102241	3	3	0	0	0	0	3	3	0	2	2	0	0	0	0	0	0	0	0	0	0	0	0	0	2	1	0	0	0	0	0	0	0	1	1	0	1	1	0	0	0	0	0	0	0
RU2B_HUMAN	U2 small nuclear ribonucleoprotein B'' OS=Homo sapiens GN=SNRPB2 PE=1 SV=1	2.713	0.7242	0.027128	5	5	3	2	2	1	1	1	1	4	4	2	2	2	1	4	4	2	2	2	1	2	2	2	3	3	1	3	3	2	3	3	2	3	3	2	2	2	1	3	3	2	2	2	1
VAPB_HUMAN	Vesicle-associated membrane protein-associated protein B/C OS=Homo sapiens GN=VAPB PE=1 SV=3	2.569	0.4208	0.41544	2	2	1	0	0	0	1	1	1	0	0	0	1	1	1	1	1	1	0	0	0	0	0	0	0	0	0	1	1	1	0	0	0	1	1	1	0	0	0	0	0	0	0	0	0
TBCA_HUMAN	Tubulin-specific chaperone A OS=Homo sapiens GN=TBCA PE=1 SV=3	3.26	0.6834	0.24031	6	6	6	0	0	0	0	0	0	1	1	1	1	1	1	0	0	0	0	0	0	0	0	0	0	0	0	1	1	1	0	0	0	0	0	0	2	2	2	2	2	2	1	1	1
HNRPK_HUMAN	Heterogeneous nuclear ribonucleoprotein K OS=Homo sapiens GN=HNRNPK PE=1 SV=1	4.647	0.7806	0.001096	26	16	16	10	10	10	20	17	17	24	17	17	18	12	12	24	16	16	9	9	9	12	10	10	19	14	14	20	10	10	13	12	12	17	12	12	20	14	14	13	11	11	15	10	10
SET_HUMAN	Protein SET OS=Homo sapiens GN=SET PE=1 SV=3	3.763	0.764	0.009249	8	5	5	4	3	3	5	5	5	6	4	4	4	3	3	5	4	4	1	1	1	8	4	4	8	4	4	2	2	2	1	1	1	4	4	4	8	4	4	13	4	4	3	2	2
GDIA_HUMAN	Rab GDP dissociation inhibitor alpha OS=Homo sapiens GN=GDI1 PE=1 SV=2	1.94	0.6915	0.126213	5	5	2	1	1	0	4	4	2	7	6	2	1	1	0	2	2	1	1	1	0	1	1	0	1	1	0	1	1	0	1	1	0	1	1	0	1	1	0	1	1	0	1	1	0
RPN2_HUMAN	Dolichyl-diphosphooligosaccharide--protein glycosyltransferase subunit 2 OS=Homo sapiens GN=RPN2 PE=1 SV=3	2.772	0.7359	0.026474	0	0	0	0	0	0	2	2	2	2	2	2	0	0	0	2	2	2	0	0	0	0	0	0	1	1	1	0	0	0	0	0	0	0	0	0	2	2	2	0	0	0	0	0	0
COTL1_HUMAN	Coactosin-like protein OS=Homo sapiens GN=COTL1 PE=1 SV=3	1.722	0.561	0.175194	0	0	0	0	0	0	1	1	1	3	3	3	1	1	1	1	1	1	0	0	0	0	0	0	1	1	1	3	3	3	0	0	0	1	1	1	3	3	3	0	0	0	0	0	0
MP2K1_HUMAN	Dual specificity mitogen-activated protein kinase kinase 1 OS=Homo sapiens GN=MAP2K1 PE=1 SV=2	1.504	0.2081	1.12621	0	0	0	0	0	0	0	0	0	0	0	0	0	0	0	0	0	0	0	0	0	0	0	0	0	0	0	0	0	0	0	0	0	1	1	0	0	0	0	0	0	0	0	0	0
ERF3A_HUMAN	Eukaryotic peptide chain release factor GTP-binding subunit ERF3A OS=Homo sapiens GN=GSPT1 PE=1 SV=1	3.316	0.7311	0.015812	4	4	1	3	3	2	6	5	2	5	5	1	5	5	2	5	5	1	1	1	0	5	5	2	6	6	2	0	0	0	0	0	0	5	5	2	3	3	1	2	2	1	2	2	1
VAPA_HUMAN	Vesicle-associated membrane protein-associated protein A OS=Homo sapiens GN=VAPA PE=1 SV=3	3.489	0.71	0.009479	4	3	2	0	0	0	3	3	3	3	2	2	3	2	2	5	5	5	1	1	1	2	2	2	2	2	2	1	1	1	1	1	1	3	3	3	2	2	2	0	0	0	2	2	2
CAN2_HUMAN	Calpain-2 catalytic subunit OS=Homo sapiens GN=CAPN2 PE=1 SV=6	2.163	0.6445	0.000513	6	6	6	1	1	1	3	3	2	4	4	4	2	2	2	5	5	5	0	0	0	0	0	0	3	3	3	1	1	1	1	1	1	2	2	2	4	4	4	2	2	2	1	1	1
SF3B2_HUMAN	Splicing factor 3B subunit 2 OS=Homo sapiens GN=SF3B2 PE=1 SV=2	2.567	0.6888	0.019227	3	3	3	3	3	3	3	3	3	6	6	6	2	2	2	6	6	6	2	2	2	2	2	2	7	7	7	4	4	4	0	0	0	4	4	4	4	4	4	0	0	0	1	1	1
IF2G_HUMAN	Eukaryotic translation initiation factor 2 subunit 3 OS=Homo sapiens GN=EIF2S3 PE=1 SV=3	3.652	0.6383	0.021718	6	6	0	6	6	1	10	9	1	4	4	0	3	3	0	3	3	1	0	0	0	1	1	0	3	3	1	0	0	0	0	0	0	1	1	0	1	1	0	0	0	0	1	1	0
H2AV_HUMAN	Histone H2A.V OS=Homo sapiens GN=H2AFV PE=1 SV=3	2.554	0.542	0.003833	3	2	0	4	2	0	3	2	0	8	2	0	9	2	0	7	3	0	14	1	0	10	2	0	11	3	0	5	1	0	1	1	0	11	3	0	7	2	0	4	1	0	6	1	0
H2AZ_HUMAN	Histone H2A.Z OS=Homo sapiens GN=H2AFZ PE=1 SV=2	2.554	0.542	0.003833	3	2	0	4	2	0	3	2	0	8	2	0	9	2	0	7	3	0	14	1	0	10	2	0	11	3	0	5	1	0	1	1	0	11	3	0	7	2	0	4	1	0	6	1	0
KIF5C_HUMAN	Kinesin heavy chain isoform 5C OS=Homo sapiens GN=KIF5C PE=1 SV=1	3.579	0.7079	0.010269	3	3	0	2	2	0	2	2	0	2	2	0	0	0	0	2	2	0	1	1	0	3	3	0	3	3	0	1	1	0	1	1	0	2	2	0	1	1	0	2	2	0	2	2	0
H2B1A_HUMAN	Histone H2B type 1-A OS=Homo sapiens GN=HIST1H2BA PE=1 SV=3	2.967	0.6686	0.002242	2	1	0	4	2	0	7	2	0	40	5	0	24	2	0	32	5	0	19	3	0	29	3	0	58	4	0	10	3	0	1	1	0	36	3	0	16	3	0	3	2	0	2	1	0
NDK8_HUMAN	Putative nucleoside diphosphate kinase OS=Homo sapiens GN=NME2P1 PE=5 SV=1	3.927	0.7232	0.000211	8	4	0	3	3	0	7	4	0	4	2	0	5	2	0	6	3	0	2	2	0	4	2	0	4	2	0	6	2	0	4	3	0	4	2	0	6	2	0	3	2	0	2	2	0
UBE2K_HUMAN	Ubiquitin-conjugating enzyme E2 K OS=Homo sapiens GN=UBE2K PE=1 SV=3	2.115	0.7505	0.162121	0	0	0	0	0	0	0	0	0	1	1	1	0	0	0	1	1	1	0	0	0	0	0	0	0	0	0	0	0	0	0	0	0	0	0	0	0	0	0	0	0	0	0	0	0
NOSIP_HUMAN	Nitric oxide synthase-interacting protein OS=Homo sapiens GN=NOSIP PE=1 SV=1	2.18	0.6034	0.366878	0	0	0	0	0	0	0	0	0	1	1	1	0	0	0	1	1	1	0	0	0	0	0	0	1	1	1	1	1	1	0	0	0	1	1	1	1	1	1	0	0	0	0	0	0
SRSF6_HUMAN	Serine/arginine-rich splicing factor 6 OS=Homo sapiens GN=SRSF6 PE=1 SV=2	3.008	0.7428	0.014186	4	3	1	5	5	3	5	5	2	8	7	4	6	5	3	6	5	2	3	3	3	4	4	2	7	6	3	6	6	3	3	3	1	5	5	2	8	7	4	3	3	1	5	5	2
BCCIP_HUMAN	BRCA2 and CDKN1A-interacting protein OS=Homo sapiens GN=BCCIP PE=1 SV=1	1.851	0.476	0.289375	2	2	2	1	1	1	2	2	2	0	0	0	0	0	0	0	0	0	0	0	0	0	0	0	0	0	0	0	0	0	0	0	0	0	0	0	1	1	1	0	0	0	0	0	0
DNJA2_HUMAN	DnaJ homolog subfamily A member 2 OS=Homo sapiens GN=DNAJA2 PE=1 SV=1	2.141	0.6693	0.065629	5	5	5	4	4	4	5	5	5	2	2	2	2	2	2	1	1	1	1	1	1	0	0	0	2	2	2	0	0	0	1	1	1	0	0	0	1	1	1	1	1	1	0	0	0
ECM1_HUMAN	Extracellular matrix protein 1 OS=Homo sapiens GN=ECM1 PE=1 SV=2	2.37	0.6658	0.072386	0	0	0	0	0	0	0	0	0	0	0	0	0	0	0	0	0	0	0	0	0	0	0	0	0	0	0	0	0	0	0	0	0	0	0	0	0	0	0	0	0	0	0	0	0
NMD3_HUMAN	60S ribosomal export protein NMD3 OS=Homo sapiens GN=NMD3 PE=1 SV=1	1.424	0.3933	1.74836	0	0	0	0	0	0	0	0	0	0	0	0	0	0	0	0	0	0	0	0	0	0	0	0	0	0	0	0	0	0	0	0	0	0	0	0	0	0	0	0	0	0	0	0	0
CUL4B_HUMAN	Cullin-4B OS=Homo sapiens GN=CUL4B PE=1 SV=4	1.387	0.4319	0.655524	0	0	0	0	0	0	0	0	0	0	0	0	0	0	0	1	1	1	0	0	0	0	0	0	0	0	0	0	0	0	0	0	0	0	0	0	0	0	0	0	0	0	0	0	0
HNRDL_HUMAN	Heterogeneous nuclear ribonucleoprotein D-like OS=Homo sapiens GN=HNRPDL PE=1 SV=3	3.18	0.7197	0.001385	3	3	3	4	4	4	5	5	4	6	5	5	4	3	3	6	6	6	1	1	1	5	5	5	6	5	5	5	4	4	3	3	3	5	5	5	5	4	4	3	3	3	3	3	3
EIF3L_HUMAN	Eukaryotic translation initiation factor 3 subunit L OS=Homo sapiens GN=EIF3L PE=1 SV=1	2.421	0.5933	0.000602	5	5	5	1	1	1	3	3	3	2	2	2	1	1	1	1	1	1	1	1	1	2	2	2	1	1	1	1	1	1	0	0	0	0	0	0	3	3	3	2	2	2	1	1	1
MED1_HUMAN	Mediator of RNA polymerase II transcription subunit 1 OS=Homo sapiens GN=MED1 PE=1 SV=4	1.144	0.5402	0.425671	0	0	0	1	1	1	0	0	0	0	0	0	0	0	0	0	0	0	0	0	0	0	0	0	0	0	0	0	0	0	0	0	0	0	0	0	0	0	0	0	0	0	0	0	0
BAP31_HUMAN	B-cell receptor-associated protein 31 OS=Homo sapiens GN=BCAP31 PE=1 SV=3	2.784	0.6086	0.037474	2	2	2	1	1	1	0	0	0	2	2	2	0	0	0	2	2	2	1	1	1	1	1	1	1	1	1	1	1	1	0	0	0	1	1	1	4	4	4	1	1	1	4	4	4
KITH_HUMAN	Thymidine kinase, cytosolic OS=Homo sapiens GN=TK1 PE=1 SV=2	2.053	0.6636	0.041652	0	0	0	1	1	1	0	0	0	1	1	1	0	0	0	1	1	1	1	1	1	1	1	1	1	1	1	1	1	1	0	0	0	1	1	1	1	1	1	0	0	0	1	1	1
WDR43_HUMAN	WD repeat-containing protein 43 OS=Homo sapiens GN=WDR43 PE=1 SV=3	2.346	0.5375	0.10082	0	0	0	0	0	0	2	2	2	3	3	3	1	1	1	2	2	2	0	0	0	1	1	1	2	2	2	0	0	0	0	0	0	2	2	2	0	0	0	0	0	0	1	1	1
GBRL2_HUMAN	Gamma-aminobutyric acid receptor-associated protein-like 2 OS=Homo sapiens GN=GABARAPL2 PE=1 SV=1	1.722	0.1243	1.03048	0	0	0	0	0	0	0	0	0	0	0	0	0	0	0	0	0	0	0	0	0	0	0	0	0	0	0	0	0	0	0	0	0	0	0	0	0	0	0	0	0	0	0	0	0
NIBL1_HUMAN	Niban-like protein 1 OS=Homo sapiens GN=FAM129B PE=1 SV=3	2.253	0.6545	0.009084	6	6	6	2	2	2	1	1	1	6	6	6	1	1	1	5	5	5	1	1	1	0	0	0	2	2	2	1	1	1	0	0	0	1	1	1	6	6	6	1	1	1	1	1	1
RAB14_HUMAN	Ras-related protein Rab-14 OS=Homo sapiens GN=RAB14 PE=1 SV=4	3.341	0.7468	0.01836	4	4	4	0	0	0	2	2	2	2	2	2	1	1	1	0	0	0	0	0	0	0	0	0	0	0	0	1	1	1	1	1	1	1	1	1	3	3	3	0	0	0	2	2	2
BAHC1_HUMAN	BAH and coiled-coil domain-containing protein 1 OS=Homo sapiens GN=BAHCC1 PE=1 SV=3	1.306	0.2201	0.327497	0	0	0	0	0	0	0	0	0	0	0	0	0	0	0	1	1	1	0	0	0	0	0	0	1	1	1	0	0	0	0	0	0	0	0	0	0	0	0	0	0	0	0	0	0
ACTBM_HUMAN	Putative beta-actin-like protein 3 OS=Homo sapiens GN=POTEKP PE=5 SV=1	3.895	0.8069	0.001569	14	2	0	13	2	0	12	3	0	16	2	0	20	2	0	14	2	0	22	2	0	12	2	0	12	2	0	17	2	0	5	2	0	13	2	0	27	2	0	17	2	0	7	2	0
IST1_HUMAN	IST1 homolog OS=Homo sapiens GN=IST1 PE=1 SV=1	1.2	0.3092	0.289577	0	0	0	0	0	0	0	0	0	0	0	0	0	0	0	1	1	1	0	0	0	0	0	0	0	0	0	0	0	0	0	0	0	0	0	0	0	0	0	0	0	0	0	0	0
IF2GL_HUMAN	Putative eukaryotic translation initiation factor 2 subunit 3-like protein OS=Homo sapiens GN=EIF2S3L PE=5 SV=2	2.917	0.5253	0.021718	6	6	0	5	5	0	9	8	0	4	4	0	3	3	0	2	2	0	0	0	0	1	1	0	2	2	0	0	0	0	0	0	0	1	1	0	1	1	0	0	0	0	1	1	0
RMXL2_HUMAN	RNA-binding motif protein, X-linked-like-2 OS=Homo sapiens GN=RBMXL2 PE=1 SV=3	2.634	0.7133	0.157592	2	2	0	1	1	0	3	3	0	2	2	0	0	0	0	3	2	0	0	0	0	0	0	0	2	2	0	0	0	0	0	0	0	1	1	0	1	1	0	0	0	0	0	0	0
PRDX5_HUMAN	Peroxiredoxin-5, mitochondrial OS=Homo sapiens GN=PRDX5 PE=1 SV=4	2.362	0.6325	0.021678	2	2	2	0	0	0	2	2	2	1	1	1	1	1	1	1	1	1	0	0	0	0	0	0	1	1	1	1	1	1	0	0	0	0	0	0	1	1	1	1	1	1	1	1	1
VATE2_HUMAN	V-type proton ATPase subunit E 2 OS=Homo sapiens GN=ATP6V1E2 PE=1 SV=1	1.526	0.3277	0.799166	0	0	0	0	0	0	0	0	0	0	0	0	0	0	0	0	0	0	0	0	0	0	0	0	0	0	0	0	0	0	0	0	0	0	0	0	1	1	0	0	0	0	0	0	0
KCC2B_HUMAN	Calcium/calmodulin-dependent protein kinase type II subunit beta OS=Homo sapiens GN=CAMK2B PE=1 SV=3	1.597	0.4389	0.629023	1	1	0	0	0	0	0	0	0	0	0	0	0	0	0	0	0	0	0	0	0	0	0	0	0	0	0	0	0	0	0	0	0	0	0	0	0	0	0	0	0	0	0	0	0
MYPN_HUMAN	Myopalladin OS=Homo sapiens GN=MYPN PE=1 SV=2	2.422	0.6473	0.006253	6	6	6	1	1	1	6	6	6	5	5	5	1	1	1	2	2	2	1	1	1	0	0	0	7	7	7	0	0	0	0	0	0	1	1	1	2	2	2	0	0	0	1	1	1
RL21_HUMAN	60S ribosomal protein L21 OS=Homo sapiens GN=RPL21 PE=1 SV=2	2.94	0.469	0.213852	0	0	0	0	0	0	1	1	1	3	3	3	3	3	3	3	3	3	0	0	0	0	0	0	3	3	3	3	3	3	0	0	0	2	2	2	2	2	2	0	0	0	0	0	0
TAD2B_HUMAN	Transcriptional adapter 2-beta OS=Homo sapiens GN=TADA2B PE=1 SV=2	1.765	0.4068	0.618082	0	0	0	0	0	0	0	0	0	0	0	0	0	0	0	0	0	0	0	0	0	0	0	0	0	0	0	0	0	0	0	0	0	0	0	0	0	0	0	0	0	0	0	0	0
SARNP_HUMAN	SAP domain-containing ribonucleoprotein OS=Homo sapiens GN=SARNP PE=1 SV=3	1.915	0.7169	0.063473	1	1	1	0	0	0	0	0	0	1	1	1	1	1	1	4	4	4	0	0	0	1	1	1	1	1	1	1	1	1	0	0	0	0	0	0	2	2	2	0	0	0	1	1	1
NU205_HUMAN	Nuclear pore complex protein Nup205 OS=Homo sapiens GN=NUP205 PE=1 SV=3	1.734	0.5734	0.109851	2	2	2	0	0	0	1	1	1	2	2	2	0	0	0	0	0	0	0	0	0	0	0	0	0	0	0	0	0	0	0	0	0	0	0	0	0	0	0	0	0	0	0	0	0
RS4Y1_HUMAN	40S ribosomal protein S4, Y isoform 1 OS=Homo sapiens GN=RPS4Y1 PE=2 SV=2	3.02	0.7298	0.005678	5	5	0	1	1	0	3	3	0	6	5	0	2	2	0	4	4	0	1	1	0	1	1	0	4	4	0	2	2	0	0	0	0	2	2	0	2	2	0	0	0	0	1	1	0
THOC4_HUMAN	THO complex subunit 4 OS=Homo sapiens GN=ALYREF PE=1 SV=3	2.766	0.5428	0.053897	1	1	1	0	0	0	0	0	0	3	3	3	1	1	1	5	4	4	0	0	0	0	0	0	2	2	2	2	2	2	2	2	2	2	1	1	1	1	1	1	1	1	0	0	0
PCNA_HUMAN	Proliferating cell nuclear antigen OS=Homo sapiens GN=PCNA PE=1 SV=1	2.717	0.735	0.017051	7	7	7	2	2	2	8	8	8	7	7	7	3	3	3	6	6	6	0	0	0	2	2	2	4	4	4	4	4	4	2	2	2	5	5	5	9	9	9	4	4	4	3	3	3
DESP_HUMAN	Desmoplakin OS=Homo sapiens GN=DSP PE=1 SV=3	2.779	0.6956	0.005234	25	25	25	9	9	9	17	17	17	32	32	31	26	25	25	41	41	41	34	34	34	16	16	16	34	34	34	20	20	20	18	18	18	41	40	40	22	22	22	15	15	15	8	8	8
MUC18_HUMAN	Cell surface glycoprotein MUC18 OS=Homo sapiens GN=MCAM PE=1 SV=2	2.147	0.7318	0.060244	2	2	2	0	0	0	2	2	2	3	3	3	2	2	2	1	1	1	0	0	0	0	0	0	2	2	2	1	1	1	1	1	1	1	1	1	2	2	2	1	1	1	1	1	1
CCD47_HUMAN	Coiled-coil domain-containing protein 47 OS=Homo sapiens GN=CCDC47 PE=1 SV=1	1.838	0.2312	1.08128	0	0	0	0	0	0	1	1	1	0	0	0	0	0	0	1	1	1	0	0	0	0	0	0	0	0	0	0	0	0	0	0	0	0	0	0	1	1	1	0	0	0	0	0	0
REEP5_HUMAN	Receptor expression-enhancing protein 5 OS=Homo sapiens GN=REEP5 PE=1 SV=3	1.997	0.5023	0.186621	1	1	1	0	0	0	0	0	0	0	0	0	0	0	0	0	0	0	0	0	0	0	0	0	0	0	0	0	0	0	0	0	0	0	0	0	1	1	1	0	0	0	0	0	0
1C17_HUMAN	HLA class I histocompatibility antigen, Cw-17 alpha chain OS=Homo sapiens GN=HLA-C PE=1 SV=1	2.621	0.7085	0.423033	1	1	0	0	0	0	1	1	0	0	0	0	0	0	0	0	0	0	0	0	0	0	0	0	0	0	0	0	0	0	0	0	0	0	0	0	0	0	0	0	0	0	0	0	0
GLU2B_HUMAN	Glucosidase 2 subunit beta OS=Homo sapiens GN=PRKCSH PE=1 SV=2	3.395	0.7544	0.002768	11	9	9	4	4	4	10	9	9	12	10	9	9	7	7	9	7	7	5	5	5	5	5	5	10	8	8	6	5	5	5	5	5	7	6	6	11	8	7	4	4	4	6	5	5
ASPD_HUMAN	Putative L-aspartate dehydrogenase OS=Homo sapiens GN=ASPDH PE=2 SV=2	1.141	0.1551	0.343962	0	0	0	0	0	0	0	0	0	0	0	0	0	0	0	0	0	0	0	0	0	0	0	0	0	0	0	0	0	0	0	0	0	0	0	0	0	0	0	0	0	0	0	0	0
EF1A1_HUMAN	Elongation factor 1-alpha 1 OS=Homo sapiens GN=EEF1A1 PE=1 SV=1	4.996	0.7895	0.000339	31	15	0	41	15	0	38	17	0	31	14	0	35	15	0	42	16	0	54	11	0	43	12	0	33	14	0	47	13	0	39	12	0	35	13	0	49	14	0	32	12	0	40	12	0
EF1A3_HUMAN	Putative elongation factor 1-alpha-like 3 OS=Homo sapiens GN=EEF1A1P5 PE=5 SV=1	4.996	0.7895	0.000339	31	15	0	41	15	0	38	17	0	31	14	0	35	15	0	42	16	0	54	11	0	43	12	0	33	14	0	47	13	0	39	12	0	35	13	0	49	14	0	32	12	0	40	12	0
TERA_HUMAN	Transitional endoplasmic reticulum ATPase OS=Homo sapiens GN=VCP PE=1 SV=4	2.777	0.7143	0.017358	21	20	20	12	12	12	24	21	21	19	19	19	9	9	9	18	17	17	4	4	4	9	9	9	12	12	12	10	10	10	6	6	6	10	10	10	14	14	14	7	7	7	9	9	9
SPT6H_HUMAN	Transcription elongation factor SPT6 OS=Homo sapiens GN=SUPT6H PE=1 SV=2	1.734	0.6683	0.084668	4	4	4	0	0	0	0	0	0	1	1	1	0	0	0	1	1	1	0	0	0	0	0	0	2	2	2	0	0	0	0	0	0	0	0	0	0	0	0	0	0	0	1	1	1
CTNA1_HUMAN	Catenin alpha-1 OS=Homo sapiens GN=CTNNA1 PE=1 SV=1	1.651	0.6275	0.87302	0	0	0	0	0	0	0	0	0	1	1	1	0	0	0	1	1	1	0	0	0	0	0	0	0	0	0	0	0	0	0	0	0	0	0	0	1	1	1	0	0	0	0	0	0
IF2A_HUMAN	Eukaryotic translation initiation factor 2 subunit 1 OS=Homo sapiens GN=EIF2S1 PE=1 SV=3	2.77	0.7526	0.040499	7	7	7	1	1	1	2	2	2	5	4	4	2	2	2	5	5	5	1	1	1	1	1	1	2	2	2	2	2	2	1	1	1	2	2	2	5	5	5	2	2	2	1	1	1
PKP1_HUMAN	Plakophilin-1 OS=Homo sapiens GN=PKP1 PE=1 SV=2	2.97	0.6835	0.000407	0	0	0	0	0	0	0	0	0	0	0	0	0	0	0	0	0	0	0	0	0	0	0	0	0	0	0	0	0	0	0	0	0	4	4	4	0	0	0	0	0	0	0	0	0
ILK_HUMAN	Integrin-linked protein kinase OS=Homo sapiens GN=ILK PE=1 SV=2	1.7	0.5688	0.614399	2	2	2	0	0	0	0	0	0	0	0	0	0	0	0	0	0	0	0	0	0	0	0	0	0	0	0	1	1	1	0	0	0	0	0	0	0	0	0	0	0	0	0	0	0
CQ066_HUMAN	Uncharacterized protein C17orf66 OS=Homo sapiens GN=C17orf66 PE=2 SV=2	1.259	0.2216	0.988559	1	1	1	0	0	0	0	0	0	0	0	0	0	0	0	0	0	0	0	0	0	0	0	0	0	0	0	0	0	0	0	0	0	0	0	0	0	0	0	0	0	0	0	0	0
CBR3_HUMAN	Carbonyl reductase [NADPH] 3 OS=Homo sapiens GN=CBR3 PE=1 SV=3	3.606	0.7855	0.01308	2	1	0	0	0	0	2	2	0	2	2	1	0	0	0	1	1	0	0	0	0	0	0	0	1	1	0	0	0	0	0	0	0	0	0	0	3	2	1	0	0	0	0	0	0
RAB13_HUMAN	Ras-related protein Rab-13 OS=Homo sapiens GN=RAB13 PE=1 SV=1	2.392	0.4974	0.012709	2	2	0	0	0	0	1	1	0	2	2	0	0	0	0	2	2	0	1	1	0	0	0	0	0	0	0	0	0	0	0	0	0	0	0	0	3	3	0	0	0	0	0	0	0
HS90B_HUMAN	Heat shock protein HSP 90-beta OS=Homo sapiens GN=HSP90AB1 PE=1 SV=4	4.265	0.8052	0.001304	61	37	11	39	26	6	56	37	10	66	30	7	53	27	6	64	32	8	55	20	4	49	23	6	52	28	7	65	28	6	28	24	5	58	31	7	67	28	7	39	21	5	46	22	5
RAE1L_HUMAN	mRNA export factor OS=Homo sapiens GN=RAE1 PE=1 SV=1	2.048	0.3867	0.228095	0	0	0	0	0	0	1	1	1	0	0	0	1	1	1	1	1	1	0	0	0	0	0	0	1	1	1	0	0	0	1	1	1	0	0	0	0	0	0	0	0	0	0	0	0
NUDC_HUMAN	Nuclear migration protein nudC OS=Homo sapiens GN=NUDC PE=1 SV=1	3.367	0.7298	0.005149	12	11	11	8	8	8	12	11	11	9	9	9	8	8	8	8	8	8	6	6	6	7	7	7	5	5	5	9	8	8	7	7	7	4	4	4	8	8	8	5	5	5	5	5	5
PRPS3_HUMAN	Ribose-phosphate pyrophosphokinase 3 OS=Homo sapiens GN=PRPS1L1 PE=1 SV=2	3.236	0.6879	0.476654	1	1	0	0	0	0	1	1	0	1	1	0	0	0	0	1	1	0	0	0	0	0	0	0	0	0	0	0	0	0	0	0	0	0	0	0	0	0	0	0	0	0	0	0	0
PGM1_HUMAN	Phosphoglucomutase-1 OS=Homo sapiens GN=PGM1 PE=1 SV=3	2.86	0.6435	0.020189	0	0	0	0	0	0	0	0	0	1	1	1	1	1	1	4	4	4	0	0	0	1	1	1	1	1	1	0	0	0	0	0	0	0	0	0	1	1	1	0	0	0	0	0	0
ROA1_HUMAN	Heterogeneous nuclear ribonucleoprotein A1 OS=Homo sapiens GN=HNRNPA1 PE=1 SV=5	4.042	0.8027	0.003175	20	10	4	13	8	4	22	11	4	19	10	4	14	8	4	20	9	4	10	5	2	14	7	4	17	10	4	20	8	4	11	8	4	13	7	4	22	11	5	11	7	4	14	8	4
IMA4_HUMAN	Importin subunit alpha-4 OS=Homo sapiens GN=KPNA4 PE=1 SV=1	1.786	0.2982	0.571401	0	0	0	0	0	0	0	0	0	0	0	0	0	0	0	0	0	0	0	0	0	1	1	0	1	1	0	0	0	0	0	0	0	1	1	0	0	0	0	0	0	0	1	1	0
PRDX3_HUMAN	Thioredoxin-dependent peroxide reductase, mitochondrial OS=Homo sapiens GN=PRDX3 PE=1 SV=3	3.079	0.7211	0.061011	4	4	4	3	3	3	4	4	4	4	4	4	1	1	1	3	3	3	1	1	1	1	1	1	1	1	1	1	1	1	1	1	1	1	1	1	2	2	2	1	1	1	1	1	1
PRC2B_HUMAN	Protein PRRC2B OS=Homo sapiens GN=PRRC2B PE=1 SV=2	2.09	0.5627	0.003121	1	1	0	0	0	0	0	0	0	1	1	0	1	1	0	1	1	0	0	0	0	0	0	0	2	2	0	0	0	0	0	0	0	1	1	0	1	1	0	0	0	0	0	0	0
AK1C1_HUMAN	Aldo-keto reductase family 1 member C1 OS=Homo sapiens GN=AKR1C1 PE=1 SV=1	2.311	0.5306	0.309381	2	2	0	0	0	0	2	2	0	1	1	0	0	0	0	1	1	0	0	0	0	0	0	0	1	1	0	0	0	0	0	0	0	0	0	0	0	0	0	0	0	0	0	0	0
GT251_HUMAN	Procollagen galactosyltransferase 1 OS=Homo sapiens GN=GLT25D1 PE=1 SV=1	1.876	0.5506	0.256871	1	1	1	1	1	1	1	1	1	4	4	4	1	1	1	0	0	0	0	0	0	2	2	2	1	1	1	0	0	0	0	0	0	0	0	0	1	1	1	0	0	0	0	0	0
CDC16_HUMAN	Cell division cycle protein 16 homolog OS=Homo sapiens GN=CDC16 PE=1 SV=2	1.383	0.4526	0.034324	0	0	0	0	0	0	1	1	1	0	0	0	0	0	0	0	0	0	0	0	0	0	0	0	0	0	0	0	0	0	0	0	0	0	0	0	0	0	0	0	0	0	0	0	0
MYO1F_HUMAN	Unconventional myosin-If OS=Homo sapiens GN=MYO1F PE=1 SV=3	2.441	0.4925	0.539027	1	1	0	0	0	0	0	0	0	1	1	0	0	0	0	0	0	0	0	0	0	0	0	0	1	1	0	0	0	0	0	0	0	0	0	0	0	0	0	0	0	0	0	0	0
VATA_HUMAN	V-type proton ATPase catalytic subunit A OS=Homo sapiens GN=ATP6V1A PE=1 SV=2	2.833	0.6723	0.018527	8	8	8	1	1	1	6	6	6	5	5	5	4	4	4	5	5	5	1	1	1	1	1	1	6	6	6	0	0	0	1	1	1	3	3	3	3	3	3	2	2	2	2	2	2
SAC1_HUMAN	Phosphatidylinositide phosphatase SAC1 OS=Homo sapiens GN=SACM1L PE=1 SV=2	1.578	0.4385	0.433237	0	0	0	0	0	0	0	0	0	0	0	0	0	0	0	1	1	1	0	0	0	0	0	0	0	0	0	0	0	0	0	0	0	0	0	0	0	0	0	0	0	0	0	0	0
IGHA2_HUMAN	Ig alpha-2 chain C region OS=Homo sapiens GN=IGHA2 PE=1 SV=3	1.964	0.5728	0.893561	0	0	0	0	0	0	0	0	0	0	0	0	0	0	0	0	0	0	0	0	0	0	0	0	0	0	0	0	0	0	0	0	0	0	0	0	0	0	0	0	0	0	0	0	0
KS6A3_HUMAN	Ribosomal protein S6 kinase alpha-3 OS=Homo sapiens GN=RPS6KA3 PE=1 SV=1	1.922	0.4043	0.237803	1	1	0	0	0	0	0	0	0	0	0	0	0	0	0	0	0	0	0	0	0	0	0	0	0	0	0	0	0	0	0	0	0	0	0	0	1	1	0	0	0	0	0	0	0
CS021_HUMAN	Uncharacterized protein C19orf21 OS=Homo sapiens GN=C19orf21 PE=1 SV=1	1.623	0.6494	0.067593	1	1	1	2	2	2	2	2	2	1	1	1	0	0	0	0	0	0	0	0	0	0	0	0	3	3	3	0	0	0	0	0	0	1	1	1	1	1	1	0	0	0	1	1	1
FND3A_HUMAN	Fibronectin type-III domain-containing protein 3A OS=Homo sapiens GN=FNDC3A PE=1 SV=4	1.791	0.4449	0.054208	2	2	2	2	2	2	0	0	0	1	1	1	0	0	0	2	2	2	0	0	0	0	0	0	0	0	0	1	1	1	1	1	1	2	2	2	0	0	0	0	0	0	0	0	0
ACINU_HUMAN	Apoptotic chromatin condensation inducer in the nucleus OS=Homo sapiens GN=ACIN1 PE=1 SV=2	1.34	0.5879	0.005924	0	0	0	0	0	0	0	0	0	0	0	0	0	0	0	0	0	0	0	0	0	0	0	0	0	0	0	0	0	0	0	0	0	0	0	0	1	1	1	0	0	0	0	0	0
PELP1_HUMAN	Proline-, glutamic acid- and leucine-rich protein 1 OS=Homo sapiens GN=PELP1 PE=1 SV=2	1.755	0.4769	0.751813	1	1	1	0	0	0	0	0	0	0	0	0	0	0	0	0	0	0	0	0	0	0	0	0	0	0	0	0	0	0	0	0	0	0	0	0	0	0	0	0	0	0	0	0	0
VINC_HUMAN	Vinculin OS=Homo sapiens GN=VCL PE=1 SV=4	3.107	0.723	0.002577	28	28	28	8	8	8	21	21	21	35	33	33	15	15	15	28	28	28	8	8	8	13	13	13	20	20	20	24	24	24	10	10	10	23	23	23	34	34	34	7	7	7	10	10	10
ANXA2_HUMAN	Annexin A2 OS=Homo sapiens GN=ANXA2 PE=1 SV=2	3.825	0.7981	0.000507	28	23	7	11	11	3	24	22	6	24	17	4	11	10	2	19	15	4	16	9	2	13	10	3	13	11	2	21	13	3	6	6	2	12	10	2	26	16	4	11	9	2	13	9	2
CTNB1_HUMAN	Catenin beta-1 OS=Homo sapiens GN=CTNNB1 PE=1 SV=1	1.213	0.2424	0.465925	0	0	0	0	0	0	0	0	0	0	0	0	1	1	0	1	1	0	0	0	0	0	0	0	0	0	0	0	0	0	0	0	0	1	1	0	0	0	0	0	0	0	0	0	0
ARC1B_HUMAN	Actin-related protein 2/3 complex subunit 1B OS=Homo sapiens GN=ARPC1B PE=1 SV=3	3.638	0.64	0.143898	2	2	2	0	0	0	2	2	2	1	1	1	0	0	0	4	4	4	0	0	0	0	0	0	2	2	2	0	0	0	0	0	0	0	0	0	1	1	1	0	0	0	0	0	0
CATL1_HUMAN	Cathepsin L1 OS=Homo sapiens GN=CTSL1 PE=1 SV=2	1.351	0.3434	1.31823	0	0	0	0	0	0	0	0	0	0	0	0	0	0	0	0	0	0	0	0	0	0	0	0	0	0	0	0	0	0	0	0	0	0	0	0	0	0	0	0	0	0	0	0	0
LRIQ1_HUMAN	Leucine-rich repeat and IQ domain-containing protein 1 OS=Homo sapiens GN=LRRIQ1 PE=2 SV=3	1.004	0.25	3.47095	0	0	0	1	1	1	0	0	0	0	0	0	0	0	0	0	0	0	0	0	0	0	0	0	0	0	0	0	0	0	0	0	0	0	0	0	0	0	0	0	0	0	0	0	0
KPYR_HUMAN	Pyruvate kinase isozymes R/L OS=Homo sapiens GN=PKLR PE=1 SV=2	2.837	0.5571	0.017852	4	3	1	3	2	0	4	2	0	5	2	0	3	2	0	5	2	0	7	2	0	5	2	0	3	2	0	4	2	0	2	1	0	5	2	0	6	2	0	4	2	0	4	2	0
KHDR2_HUMAN	KH domain-containing, RNA-binding, signal transduction-associated protein 2 OS=Homo sapiens GN=KHDRBS2 PE=1 SV=1	2.022	0.4422	0.107593	1	1	0	0	0	0	2	2	0	3	3	0	1	1	0	3	3	0	0	0	0	4	4	0	4	4	0	2	2	0	2	2	0	4	4	0	2	2	0	1	1	0	2	2	0
NAA10_HUMAN	N-alpha-acetyltransferase 10 OS=Homo sapiens GN=NAA10 PE=1 SV=1	2.778	0.783	0.012092	3	3	2	0	0	0	1	1	1	3	3	2	1	1	1	2	2	0	0	0	0	1	1	1	0	0	0	1	1	1	0	0	0	2	2	1	2	2	2	2	2	1	1	1	1
PRS6A_HUMAN	26S protease regulatory subunit 6A OS=Homo sapiens GN=PSMC3 PE=1 SV=3	2.38	0.7629	0.02829	14	13	13	5	5	5	13	13	13	3	3	3	1	1	1	5	5	5	0	0	0	0	0	0	3	3	3	0	0	0	0	0	0	1	1	1	4	4	4	0	0	0	0	0	0
AT1A4_HUMAN	Sodium/potassium-transporting ATPase subunit alpha-4 OS=Homo sapiens GN=ATP1A4 PE=1 SV=3	2.304	0.5678	0.010415	0	0	0	1	1	0	2	2	0	1	1	0	0	0	0	1	1	0	0	0	0	0	0	0	0	0	0	0	0	0	0	0	0	0	0	0	1	1	0	0	0	0	0	0	0
CAZA1_HUMAN	F-actin-capping protein subunit alpha-1 OS=Homo sapiens GN=CAPZA1 PE=1 SV=3	3.711	0.7674	0.022861	5	5	4	2	2	2	5	5	3	5	5	3	3	3	2	4	4	3	1	1	1	0	0	0	3	3	2	2	2	1	3	3	3	2	2	2	5	4	3	1	1	1	2	2	2
SPERT_HUMAN	Spermatid-associated protein OS=Homo sapiens GN=SPERT PE=2 SV=1	1.205	0.2465	1.73203	0	0	0	0	0	0	1	1	1	0	0	0	0	0	0	0	0	0	0	0	0	0	0	0	0	0	0	0	0	0	0	0	0	0	0	0	0	0	0	0	0	0	0	0	0
DPYL2_HUMAN	Dihydropyrimidinase-related protein 2 OS=Homo sapiens GN=DPYSL2 PE=1 SV=1	2.417	0.651	0.030901	4	4	3	0	0	0	5	5	4	4	4	3	4	4	3	6	6	3	1	1	1	3	3	2	3	3	3	4	4	3	3	3	2	5	5	4	3	3	2	2	2	1	1	1	1
KI21A_HUMAN	Kinesin-like protein KIF21A OS=Homo sapiens GN=KIF21A PE=1 SV=2	1.19	0.1479	0.407581	0	0	0	0	0	0	0	0	0	0	0	0	0	0	0	0	0	0	1	1	1	0	0	0	0	0	0	0	0	0	0	0	0	0	0	0	0	0	0	0	0	0	0	0	0
S38A1_HUMAN	Sodium-coupled neutral amino acid transporter 1 OS=Homo sapiens GN=SLC38A1 PE=1 SV=1	2.64	0.5117	0.250415	0	0	0	0	0	0	3	3	3	1	1	1	0	0	0	1	1	1	0	0	0	0	0	0	0	0	0	0	0	0	0	0	0	0	0	0	0	0	0	0	0	0	0	0	0
PDCD6_HUMAN	Programmed cell death protein 6 OS=Homo sapiens GN=PDCD6 PE=1 SV=1	3.262	0.6215	0.003625	5	4	4	0	0	0	1	1	1	3	3	3	1	1	1	1	1	1	0	0	0	0	0	0	1	1	1	1	1	1	0	0	0	1	1	1	2	2	2	0	0	0	1	1	1
IF2B3_HUMAN	Insulin-like growth factor 2 mRNA-binding protein 3 OS=Homo sapiens GN=IGF2BP3 PE=1 SV=2	1.956	0.6837	0.003378	4	4	2	1	1	1	3	3	3	5	5	3	1	1	1	2	2	2	1	1	1	2	2	2	5	5	5	4	4	4	2	2	2	1	1	1	1	1	1	1	1	1	2	2	2
CHM4B_HUMAN	Charged multivesicular body protein 4b OS=Homo sapiens GN=CHMP4B PE=1 SV=1	1.761	0.5416	0.069622	1	1	1	0	0	0	2	2	2	1	1	1	0	0	0	0	0	0	0	0	0	0	0	0	0	0	0	0	0	0	0	0	0	0	0	0	2	2	2	0	0	0	0	0	0
MCM4_HUMAN	DNA replication licensing factor MCM4 OS=Homo sapiens GN=MCM4 PE=1 SV=5	2.663	0.7057	0.001918	7	7	7	1	1	1	8	7	7	5	4	4	2	2	2	7	6	6	0	0	0	1	1	1	6	5	5	1	1	1	0	0	0	3	3	3	4	4	4	1	1	1	2	2	2
RS3_HUMAN	40S ribosomal protein S3 OS=Homo sapiens GN=RPS3 PE=1 SV=2	4.296	0.7446	0.02711	15	12	12	9	9	9	13	10	10	13	8	8	9	7	7	12	10	10	4	4	4	6	5	5	9	8	8	10	8	8	3	3	3	8	6	6	10	7	7	3	3	3	6	6	6
NDRG1_HUMAN	Protein NDRG1 OS=Homo sapiens GN=NDRG1 PE=1 SV=1	2.79	0.7277	0.077227	2	2	2	0	0	0	1	1	1	2	2	2	1	1	1	2	2	2	1	1	1	0	0	0	0	0	0	1	1	1	0	0	0	0	0	0	2	2	2	1	1	1	0	0	0
BASP1_HUMAN	Brain acid soluble protein 1 OS=Homo sapiens GN=BASP1 PE=1 SV=2	2.626	0.7145	0.010026	2	2	2	1	1	1	3	3	3	2	2	2	3	3	3	1	1	1	0	0	0	3	3	3	4	4	4	0	0	0	4	4	4	2	2	2	2	2	2	3	3	3	0	0	0
EPIPL_HUMAN	Epiplakin OS=Homo sapiens GN=EPPK1 PE=1 SV=2	2.4	0.6998	0.006016	10	10	6	3	3	1	9	9	6	7	5	2	1	1	0	4	4	2	5	4	2	3	2	1	17	14	12	4	3	1	2	2	0	7	6	4	3	2	0	1	1	0	2	1	0
DBNL_HUMAN	Drebrin-like protein OS=Homo sapiens GN=DBNL PE=1 SV=1	1.469	0.4629	1.86977	1	1	1	0	0	0	0	0	0	0	0	0	0	0	0	0	0	0	0	0	0	0	0	0	0	0	0	0	0	0	0	0	0	0	0	0	0	0	0	0	0	0	0	0	0
ATF1_HUMAN	Cyclic AMP-dependent transcription factor ATF-1 OS=Homo sapiens GN=ATF1 PE=1 SV=2	2.199	0.4612	0.15315	0	0	0	0	0	0	0	0	0	1	1	0	2	2	1	1	1	0	2	2	1	0	0	0	1	1	0	1	1	0	0	0	0	1	1	0	1	1	0	0	0	0	0	0	0
S10A4_HUMAN	Protein S100-A4 OS=Homo sapiens GN=S100A4 PE=1 SV=1	2.311	0.5881	0.083883	0	0	0	0	0	0	1	1	1	2	2	2	3	3	3	2	2	2	1	1	1	1	1	1	2	2	2	0	0	0	1	1	1	2	2	2	2	2	2	1	1	1	2	2	2
CREB1_HUMAN	Cyclic AMP-responsive element-binding protein 1 OS=Homo sapiens GN=CREB1 PE=1 SV=2	2.199	0.4612	0.15315	0	0	0	0	0	0	0	0	0	1	1	0	1	1	0	1	1	0	1	1	0	0	0	0	1	1	0	1	1	0	0	0	0	1	1	0	1	1	0	0	0	0	0	0	0
SPB6_HUMAN	Serpin B6 OS=Homo sapiens GN=SERPINB6 PE=1 SV=3	3.177	0.7299	0.045042	11	10	9	2	2	2	10	9	8	2	2	1	1	1	0	2	2	1	0	0	0	1	1	0	0	0	0	1	1	0	0	0	0	1	1	0	3	3	2	0	0	0	1	1	0
ALDOC_HUMAN	Fructose-bisphosphate aldolase C OS=Homo sapiens GN=ALDOC PE=1 SV=2	3.02	0.4776	0.022163	2	2	0	2	2	0	4	4	1	4	3	0	4	4	1	4	3	0	4	3	0	2	2	0	2	2	0	3	3	0	2	2	0	5	4	1	3	3	0	3	3	0	4	3	1
GNAI2_HUMAN	Guanine nucleotide-binding protein G(i) subunit alpha-2 OS=Homo sapiens GN=GNAI2 PE=1 SV=3	2.329	0.5987	0.003423	1	1	0	1	1	0	0	0	0	1	1	0	0	0	0	1	1	0	0	0	0	0	0	0	0	0	0	0	0	0	0	0	0	0	0	0	1	1	0	0	0	0	0	0	0
GALK1_HUMAN	Galactokinase OS=Homo sapiens GN=GALK1 PE=1 SV=1	1.202	0.4151	0.655399	0	0	0	0	0	0	0	0	0	0	0	0	0	0	0	0	0	0	0	0	0	0	0	0	1	1	1	0	0	0	0	0	0	0	0	0	0	0	0	0	0	0	0	0	0
TXD17_HUMAN	Thioredoxin domain-containing protein 17 OS=Homo sapiens GN=TXNDC17 PE=1 SV=1	2.108	0.5865	0.110854	1	1	1	0	0	0	0	0	0	1	1	1	2	2	2	2	2	2	0	0	0	0	0	0	1	1	1	1	1	1	0	0	0	1	1	1	1	1	1	0	0	0	0	0	0
UE2NL_HUMAN	Putative ubiquitin-conjugating enzyme E2 N-like OS=Homo sapiens GN=UBE2NL PE=1 SV=1	2.742	0.5591	0.056317	3	3	0	2	2	0	3	3	0	3	3	0	2	2	0	3	3	0	2	2	0	2	2	0	1	1	0	4	3	0	1	1	0	2	2	0	3	3	0	1	1	0	1	1	0
UBE2N_HUMAN	Ubiquitin-conjugating enzyme E2 N OS=Homo sapiens GN=UBE2N PE=1 SV=1	2.742	0.5591	0.056317	3	3	0	2	2	0	3	3	0	3	3	0	2	2	0	3	3	0	2	2	0	2	2	0	1	1	0	4	3	0	1	1	0	2	2	0	3	3	0	1	1	0	1	1	0
ACADM_HUMAN	Medium-chain specific acyl-CoA dehydrogenase, mitochondrial OS=Homo sapiens GN=ACADM PE=1 SV=1	2.32	0.6371	0.017125	2	2	2	0	0	0	1	1	1	2	2	2	0	0	0	2	2	2	0	0	0	0	0	0	2	2	2	0	0	0	0	0	0	0	0	0	1	1	1	0	0	0	0	0	0
C1TC_HUMAN	C-1-tetrahydrofolate synthase, cytoplasmic OS=Homo sapiens GN=MTHFD1 PE=1 SV=3	3.017	0.7393	0.003964	8	8	8	4	4	4	14	14	13	7	7	6	7	7	6	9	9	9	3	3	3	5	5	4	9	9	8	9	9	8	6	6	5	8	8	7	8	8	7	3	3	2	7	7	6
ITA3_HUMAN	Integrin alpha-3 OS=Homo sapiens GN=ITGA3 PE=1 SV=5	1.6	0.5363	0.170293	0	0	0	0	0	0	1	1	1	0	0	0	0	0	0	1	1	1	0	0	0	0	0	0	0	0	0	0	0	0	0	0	0	0	0	0	0	0	0	0	0	0	0	0	0
DCTN5_HUMAN	Dynactin subunit 5 OS=Homo sapiens GN=DCTN5 PE=1 SV=1	1.576	0.5704	0.419988	0	0	0	0	0	0	0	0	0	0	0	0	1	1	1	0	0	0	0	0	0	0	0	0	0	0	0	0	0	0	1	1	1	0	0	0	0	0	0	0	0	0	0	0	0
ERF1_HUMAN	Eukaryotic peptide chain release factor subunit 1 OS=Homo sapiens GN=ETF1 PE=1 SV=3	2.408	0.7562	0.049754	5	5	5	1	1	1	4	4	4	5	5	5	1	1	1	3	3	3	1	1	1	0	0	0	4	4	4	1	1	1	0	0	0	2	2	2	3	3	3	0	0	0	0	0	0
HS905_HUMAN	Putative heat shock protein HSP 90-alpha A5 OS=Homo sapiens GN=HSP90AA5P PE=1 SV=1	3.084	0.7502	0.004393	8	5	0	4	4	0	9	7	0	11	6	0	10	5	0	10	6	0	2	1	0	6	3	0	9	5	0	7	3	0	4	4	0	8	5	0	11	5	0	3	2	0	7	3	0
GBRAP_HUMAN	Gamma-aminobutyric acid receptor-associated protein OS=Homo sapiens GN=GABARAP PE=1 SV=1	1.722	0.1243	1.03048	0	0	0	0	0	0	0	0	0	0	0	0	0	0	0	0	0	0	0	0	0	0	0	0	0	0	0	0	0	0	0	0	0	0	0	0	0	0	0	0	0	0	0	0	0
SC24C_HUMAN	Protein transport protein Sec24C OS=Homo sapiens GN=SEC24C PE=1 SV=3	2.735	0.6434	0.008333	5	5	5	1	1	1	4	4	4	3	3	3	3	3	3	4	4	4	1	1	1	3	3	3	5	5	5	4	4	4	0	0	0	4	4	4	3	3	3	1	1	1	3	3	3
PDLI7_HUMAN	PDZ and LIM domain protein 7 OS=Homo sapiens GN=PDLIM7 PE=1 SV=1	2.136	0.611	0.031359	3	3	3	0	0	0	1	1	1	1	1	1	2	2	2	2	2	2	1	1	1	1	1	1	1	1	1	1	1	1	1	1	1	1	1	1	1	1	1	0	0	0	0	0	0
RS4X_HUMAN	40S ribosomal protein S4, X isoform OS=Homo sapiens GN=RPS4X PE=1 SV=2	3.02	0.7298	0.005678	12	12	6	2	2	1	7	7	4	17	13	6	7	7	5	11	10	6	5	5	4	5	5	4	10	9	4	7	7	3	2	2	2	9	8	5	8	8	5	1	1	1	2	2	1
NFYC_HUMAN	Nuclear transcription factor Y subunit gamma OS=Homo sapiens GN=NFYC PE=1 SV=3	1.573	0.4323	0.105473	0	0	0	0	0	0	1	1	1	0	0	0	0	0	0	1	1	1	0	0	0	0	0	0	1	1	1	0	0	0	0	0	0	0	0	0	0	0	0	0	0	0	0	0	0
H90B4_HUMAN	Putative heat shock protein HSP 90-beta 4 OS=Homo sapiens GN=HSP90AB4P PE=5 SV=1	2.734	0.7093	0.008033	8	4	0	6	5	0	7	6	0	9	4	0	9	4	0	10	4	0	9	3	0	10	3	0	12	4	0	10	4	0	4	4	0	10	5	0	10	4	0	7	3	0	11	3	0
PHB_HUMAN	Prohibitin OS=Homo sapiens GN=PHB PE=1 SV=1	2.643	0.7132	0.000358	7	7	7	4	4	4	6	6	6	5	5	5	2	2	2	7	7	7	0	0	0	1	1	1	3	3	3	2	2	2	1	1	1	3	3	3	4	4	4	2	2	2	3	3	3
ERH_HUMAN	Enhancer of rudimentary homolog OS=Homo sapiens GN=ERH PE=1 SV=1	1.792	0.4854	0.000642	2	2	2	0	0	0	0	0	0	2	2	2	0	0	0	1	1	1	0	0	0	0	0	0	0	0	0	0	0	0	0	0	0	0	0	0	1	1	1	0	0	0	2	2	2
CPSF1_HUMAN	Cleavage and polyadenylation specificity factor subunit 1 OS=Homo sapiens GN=CPSF1 PE=1 SV=2	1.34	0.5284	0.685266	1	1	1	0	0	0	0	0	0	0	0	0	0	0	0	0	0	0	0	0	0	0	0	0	0	0	0	0	0	0	0	0	0	0	0	0	0	0	0	0	0	0	0	0	0
H90B2_HUMAN	Putative heat shock protein HSP 90-beta 2 OS=Homo sapiens GN=HSP90AB2P PE=1 SV=2	3.951	0.7779	0.001304	16	10	0	17	10	1	18	11	0	20	9	0	21	9	0	21	10	0	22	7	0	18	8	0	16	8	0	23	9	0	8	8	0	18	8	0	22	9	0	14	7	0	16	7	0
TTC24_HUMAN	Tetratricopeptide repeat protein 24 OS=Homo sapiens GN=TTC24 PE=2 SV=1	1.178	0.1978	1.57564	0	0	0	0	0	0	1	1	1	0	0	0	0	0	0	0	0	0	0	0	0	0	0	0	0	0	0	0	0	0	0	0	0	0	0	0	0	0	0	0	0	0	0	0	0
TBB3_HUMAN	Tubulin beta-3 chain OS=Homo sapiens GN=TUBB3 PE=1 SV=2	3.696	0.7512	0.001544	41	16	0	52	14	0	43	17	0	38	14	1	21	8	0	27	12	0	19	6	0	22	7	0	32	13	0	33	8	0	15	6	0	23	9	0	33	10	0	19	5	0	19	6	0
ACAD9_HUMAN	Acyl-CoA dehydrogenase family member 9, mitochondrial OS=Homo sapiens GN=ACAD9 PE=1 SV=1	1.799	0.5497	0.35447	0	0	0	0	0	0	0	0	0	0	0	0	1	1	1	1	1	1	0	0	0	0	0	0	1	1	1	0	0	0	0	0	0	0	0	0	0	0	0	0	0	0	0	0	0
GALT2_HUMAN	Polypeptide N-acetylgalactosaminyltransferase 2 OS=Homo sapiens GN=GALNT2 PE=1 SV=1	2.111	0.6332	0.001428	3	3	3	1	1	1	1	1	1	5	5	4	1	1	1	5	5	4	0	0	0	1	1	1	1	1	1	0	0	0	0	0	0	1	1	1	2	2	2	1	1	1	1	1	1
TLK2_HUMAN	Serine/threonine-protein kinase tousled-like 2 OS=Homo sapiens GN=TLK2 PE=1 SV=2	1.059	0.1898	1.71237	0	0	0	0	0	0	0	0	0	0	0	0	0	0	0	1	1	1	0	0	0	0	0	0	0	0	0	0	0	0	0	0	0	0	0	0	0	0	0	0	0	0	0	0	0
WDR3_HUMAN	WD repeat-containing protein 3 OS=Homo sapiens GN=WDR3 PE=1 SV=1	1.469	0.4282	0.636957	0	0	0	0	0	0	0	0	0	0	0	0	0	0	0	1	1	1	0	0	0	0	0	0	2	2	2	0	0	0	0	0	0	0	0	0	0	0	0	0	0	0	0	0	0
CLU_HUMAN	Clustered mitochondria protein homolog OS=Homo sapiens GN=CLUH PE=1 SV=2	2.321	0.6015	0.06782	1	1	1	0	0	0	0	0	0	3	3	3	1	1	1	2	2	2	0	0	0	0	0	0	2	2	2	0	0	0	0	0	0	1	1	1	0	0	0	0	0	0	0	0	0
H2AY_HUMAN	Core histone macro-H2A.1 OS=Homo sapiens GN=H2AFY PE=1 SV=4	1.552	0.362	0.112917	0	0	0	0	0	0	0	0	0	1	1	0	0	0	0	1	1	0	0	0	0	0	0	0	1	1	0	0	0	0	0	0	0	0	0	0	0	0	0	0	0	0	0	0	0
THIL_HUMAN	Acetyl-CoA acetyltransferase, mitochondrial OS=Homo sapiens GN=ACAT1 PE=1 SV=1	1.89	0.4741	0.074554	0	0	0	0	0	0	0	0	0	0	0	0	0	0	0	0	0	0	0	0	0	0	0	0	1	1	1	0	0	0	0	0	0	0	0	0	1	1	1	0	0	0	0	0	0
TSR1_HUMAN	Pre-rRNA-processing protein TSR1 homolog OS=Homo sapiens GN=TSR1 PE=1 SV=1	1.781	0.443	0.118986	0	0	0	0	0	0	0	0	0	0	0	0	0	0	0	1	1	1	0	0	0	0	0	0	0	0	0	0	0	0	0	0	0	0	0	0	1	1	1	0	0	0	0	0	0
CPIN1_HUMAN	Anamorsin OS=Homo sapiens GN=CIAPIN1 PE=1 SV=2	1.671	0.6388	0.039388	1	1	1	0	0	0	0	0	0	0	0	0	0	0	0	1	1	1	0	0	0	0	0	0	1	1	1	1	1	1	1	1	1	1	1	1	0	0	0	1	1	1	1	1	1
NUCL_HUMAN	Nucleolin OS=Homo sapiens GN=NCL PE=1 SV=3	2.918	0.8013	0.003605	15	15	15	20	19	19	19	19	19	23	20	20	20	18	18	23	19	19	13	11	11	19	15	15	23	16	16	21	16	16	14	14	14	22	18	18	14	14	14	11	11	11	16	14	14
MYO1C_HUMAN	Unconventional myosin-Ic OS=Homo sapiens GN=MYO1C PE=1 SV=4	2.082	0.5874	0.264686	2	2	2	1	1	1	2	2	2	2	2	2	0	0	0	1	1	1	0	0	0	0	0	0	3	3	3	0	0	0	0	0	0	1	1	1	0	0	0	0	0	0	1	1	1
SRP14_HUMAN	Signal recognition particle 14 kDa protein OS=Homo sapiens GN=SRP14 PE=1 SV=2	3.252	0.7086	0.010505	3	3	3	2	2	2	1	1	1	1	1	1	1	1	1	2	2	2	0	0	0	0	0	0	2	2	2	2	2	2	1	1	1	1	1	1	4	4	4	1	1	1	2	2	2
PWP2_HUMAN	Periodic tryptophan protein 2 homolog OS=Homo sapiens GN=PWP2 PE=1 SV=2	1.406	0.4495	1.36244	0	0	0	0	0	0	0	0	0	0	0	0	0	0	0	0	0	0	0	0	0	0	0	0	0	0	0	0	0	0	1	1	1	0	0	0	0	0	0	0	0	0	0	0	0
PLSI_HUMAN	Plastin-1 OS=Homo sapiens GN=PLS1 PE=1 SV=2	1.564	0.4258	0.314484	1	1	0	0	0	0	0	0	0	0	0	0	0	0	0	0	0	0	0	0	0	0	0	0	0	0	0	0	0	0	0	0	0	0	0	0	0	0	0	0	0	0	0	0	0
MCMBP_HUMAN	Mini-chromosome maintenance complex-binding protein OS=Homo sapiens GN=MCMBP PE=1 SV=2	2.09	0.6865	0.001215	1	1	1	1	1	1	1	1	1	3	3	3	1	1	1	2	2	2	0	0	0	1	1	1	1	1	1	1	1	1	1	1	1	1	1	1	1	1	1	0	0	0	0	0	0
ECHM_HUMAN	Enoyl-CoA hydratase, mitochondrial OS=Homo sapiens GN=ECHS1 PE=1 SV=4	1.83	0.5965	0.01809	3	3	3	0	0	0	1	1	1	2	2	2	1	1	1	2	2	2	0	0	0	2	2	2	1	1	1	0	0	0	0	0	0	2	2	2	3	3	3	1	1	1	2	2	2
GGH_HUMAN	Gamma-glutamyl hydrolase OS=Homo sapiens GN=GGH PE=1 SV=2	1.933	0.4225	0.487768	0	0	0	0	0	0	1	1	1	0	0	0	1	1	1	1	1	1	0	0	0	0	0	0	0	0	0	0	0	0	0	0	0	0	0	0	0	0	0	0	0	0	0	0	0
2ABD_HUMAN	Serine/threonine-protein phosphatase 2A 55 kDa regulatory subunit B delta isoform OS=Homo sapiens GN=PPP2R2D PE=1 SV=1	1.077	0.2154	1.03864	0	0	0	0	0	0	0	0	0	0	0	0	0	0	0	0	0	0	0	0	0	0	0	0	0	0	0	0	0	0	0	0	0	0	0	0	0	0	0	0	0	0	0	0	0
RUXG_HUMAN	Small nuclear ribonucleoprotein G OS=Homo sapiens GN=SNRPG PE=1 SV=1	1.373	0.4338	0.473036	1	1	0	0	0	0	0	0	0	1	1	0	0	0	0	1	1	0	0	0	0	0	0	0	1	1	0	0	0	0	0	0	0	1	1	0	1	1	0	0	0	0	1	1	0
BPNT1_HUMAN	3'(2'),5'-bisphosphate nucleotidase 1 OS=Homo sapiens GN=BPNT1 PE=1 SV=1	1.507	0.4804	0.199363	0	0	0	0	0	0	0	0	0	0	0	0	0	0	0	0	0	0	0	0	0	0	0	0	0	0	0	0	0	0	0	0	0	0	0	0	1	1	1	0	0	0	0	0	0
WDR11_HUMAN	WD repeat-containing protein 11 OS=Homo sapiens GN=WDR11 PE=1 SV=1	1.379	0.4064	0.355504	1	1	1	1	1	1	1	1	1	1	1	1	0	0	0	0	0	0	0	0	0	1	1	1	0	0	0	0	0	0	1	1	1	1	1	1	1	1	1	0	0	0	0	0	0
HN1L_HUMAN	Hematological and neurological expressed 1-like protein OS=Homo sapiens GN=HN1L PE=1 SV=1	1.1	0.3709	0.223187	1	1	1	0	0	0	0	0	0	0	0	0	0	0	0	0	0	0	0	0	0	0	0	0	1	1	1	0	0	0	0	0	0	0	0	0	0	0	0	0	0	0	0	0	0
FKBP8_HUMAN	Peptidyl-prolyl cis-trans isomerase FKBP8 OS=Homo sapiens GN=FKBP8 PE=1 SV=2	1.939	0.5245	0.263038	1	1	1	0	0	0	1	1	1	0	0	0	1	1	1	1	1	1	0	0	0	0	0	0	0	0	0	0	0	0	0	0	0	0	0	0	0	0	0	0	0	0	0	0	0
ALDR_HUMAN	Aldose reductase OS=Homo sapiens GN=AKR1B1 PE=1 SV=3	1.881	0.4183	0.230639	2	2	2	0	0	0	1	1	1	3	3	3	0	0	0	2	2	1	0	0	0	0	0	0	1	1	1	0	0	0	0	0	0	0	0	0	2	2	2	0	0	0	0	0	0
RS17_HUMAN	40S ribosomal protein S17 OS=Homo sapiens GN=RPS17 PE=1 SV=2	2.446	0.6241	0.029102	1	1	0	1	1	0	0	0	0	2	2	0	1	1	0	1	1	0	0	0	0	1	1	0	1	1	0	0	0	0	0	0	0	1	1	0	1	1	0	0	0	0	1	1	0
NSD1_HUMAN	Histone-lysine N-methyltransferase, H3 lysine-36 and H4 lysine-20 specific OS=Homo sapiens GN=NSD1 PE=1 SV=1	1.549	0.1607	0.732354	0	0	0	0	0	0	0	0	0	0	0	0	0	0	0	0	0	0	0	0	0	0	0	0	0	0	0	1	1	0	0	0	0	0	0	0	0	0	0	0	0	0	0	0	0
DHB4_HUMAN	Peroxisomal multifunctional enzyme type 2 OS=Homo sapiens GN=HSD17B4 PE=1 SV=3	3.321	0.7401	0.005709	8	8	8	0	0	0	6	6	6	7	7	7	2	2	2	5	5	5	1	1	1	3	3	3	5	5	5	2	2	2	0	0	0	3	3	3	6	6	6	2	2	2	4	4	4
DCK_HUMAN	Deoxycytidine kinase OS=Homo sapiens GN=DCK PE=1 SV=1	1.344	0.4531	0.753962	1	1	1	0	0	0	0	0	0	0	0	0	0	0	0	0	0	0	0	0	0	0	0	0	0	0	0	0	0	0	0	0	0	0	0	0	0	0	0	0	0	0	0	0	0
SON_HUMAN	Protein SON OS=Homo sapiens GN=SON PE=1 SV=4	1.714	0.5364	0.043104	0	0	0	0	0	0	2	2	2	1	1	1	0	0	0	0	0	0	1	1	1	0	0	0	3	3	3	2	2	2	0	0	0	2	2	2	0	0	0	1	1	1	2	2	2
MYH2_HUMAN	Myosin-2 OS=Homo sapiens GN=MYH2 PE=1 SV=1	1.991	0.3014	0.224977	0	0	0	0	0	0	0	0	0	0	0	0	0	0	0	0	0	0	1	1	0	0	0	0	0	0	0	0	0	0	0	0	0	0	0	0	0	0	0	0	0	0	0	0	0
ENTP6_HUMAN	Ectonucleoside triphosphate diphosphohydrolase 6 OS=Homo sapiens GN=ENTPD6 PE=1 SV=3	0.811	0.2219	2.64425	1	1	1	0	0	0	0	0	0	0	0	0	0	0	0	0	0	0	0	0	0	0	0	0	0	0	0	0	0	0	0	0	0	0	0	0	0	0	0	0	0	0	0	0	0
RS12_HUMAN	40S ribosomal protein S12 OS=Homo sapiens GN=RPS12 PE=1 SV=3	2.087	0.6774	0.052163	3	2	2	2	2	2	2	1	1	3	2	2	4	2	2	5	2	2	0	0	0	1	1	1	4	2	2	3	2	2	2	1	1	3	2	2	4	2	2	0	0	0	1	1	1
RAB3C_HUMAN	Ras-related protein Rab-3C OS=Homo sapiens GN=RAB3C PE=2 SV=1	1.174	0.47	0.052989	0	0	0	0	0	0	0	0	0	1	1	0	0	0	0	1	1	0	0	0	0	0	0	0	0	0	0	0	0	0	0	0	0	0	0	0	1	1	0	0	0	0	0	0	0
CLH1_HUMAN	Clathrin heavy chain 1 OS=Homo sapiens GN=CLTC PE=1 SV=5	3.609	0.7629	0.000216	33	27	21	17	17	12	28	26	19	21	19	14	9	8	6	21	20	16	5	5	5	6	6	5	18	18	14	11	10	8	5	5	3	14	14	13	15	13	10	3	3	3	7	7	6
HYPK_HUMAN	Huntingtin-interacting protein K OS=Homo sapiens GN=HYPK PE=1 SV=2	1.805	0.5393	0.095993	1	1	1	0	0	0	0	0	0	1	1	1	1	1	1	0	0	0	0	0	0	0	0	0	0	0	0	0	0	0	0	0	0	0	0	0	0	0	0	0	0	0	0	0	0
A2ML1_HUMAN	Alpha-2-macroglobulin-like protein 1 OS=Homo sapiens GN=A2ML1 PE=1 SV=3	1.283	0.3749	0.202652	0	0	0	0	0	0	0	0	0	0	0	0	0	0	0	0	0	0	1	1	1	0	0	0	0	0	0	0	0	0	0	0	0	0	0	0	0	0	0	0	0	0	0	0	0
ADT3_HUMAN	ADP/ATP translocase 3 OS=Homo sapiens GN=SLC25A6 PE=1 SV=4	2.069	0.6122	0.147836	7	7	1	1	1	0	1	1	0	1	1	0	1	1	0	2	2	0	1	1	0	1	1	0	1	1	0	1	1	0	1	1	0	1	1	0	1	1	0	1	1	0	1	1	0
SMRC2_HUMAN	SWI/SNF complex subunit SMARCC2 OS=Homo sapiens GN=SMARCC2 PE=1 SV=1	2.41	0.5816	0.017669	1	1	0	0	0	0	1	1	0	0	0	0	0	0	0	0	0	0	0	0	0	1	1	1	5	5	4	0	0	0	0	0	0	0	0	0	2	2	2	0	0	0	1	1	1
FPPS_HUMAN	Farnesyl pyrophosphate synthase OS=Homo sapiens GN=FDPS PE=1 SV=4	2.432	0.6176	0.004519	3	3	3	0	0	0	1	1	1	3	3	3	0	0	0	4	4	4	0	0	0	0	0	0	0	0	0	1	1	1	0	0	0	0	0	0	2	2	2	1	1	1	1	1	1
SSBP_HUMAN	Single-stranded DNA-binding protein, mitochondrial OS=Homo sapiens GN=SSBP1 PE=1 SV=1	3.337	0.7833	0.008625	2	2	2	0	0	0	2	2	2	4	4	4	1	1	1	3	3	3	1	1	1	4	4	4	3	3	3	1	1	1	0	0	0	1	1	1	1	1	1	1	1	1	3	3	3
EFHD1_HUMAN	EF-hand domain-containing protein D1 OS=Homo sapiens GN=EFHD1 PE=1 SV=1	1.222	0.234	2.79303	0	0	0	0	0	0	0	0	0	0	0	0	0	0	0	1	1	1	0	0	0	0	0	0	0	0	0	0	0	0	0	0	0	0	0	0	1	1	1	0	0	0	0	0	0
AFAP1_HUMAN	Actin filament-associated protein 1 OS=Homo sapiens GN=AFAP1 PE=1 SV=2	2.187	0.4476	0.287625	0	0	0	1	1	1	1	1	1	0	0	0	0	0	0	2	2	2	0	0	0	0	0	0	0	0	0	0	0	0	0	0	0	1	1	1	0	0	0	0	0	0	0	0	0
NU107_HUMAN	Nuclear pore complex protein Nup107 OS=Homo sapiens GN=NUP107 PE=1 SV=1	2.339	0.613	0.021516	7	7	7	2	2	2	2	2	2	1	1	1	0	0	0	1	1	1	0	0	0	0	0	0	3	3	3	0	0	0	0	0	0	1	1	1	1	1	1	0	0	0	0	0	0
TCTP_HUMAN	Translationally-controlled tumor protein OS=Homo sapiens GN=TPT1 PE=1 SV=1	2.33	0.5064	0.01746	3	3	2	0	0	0	0	0	0	2	2	1	1	1	1	2	2	1	1	1	1	0	0	0	1	1	1	2	2	1	0	0	0	0	0	0	2	2	1	0	0	0	1	1	1
ZN622_HUMAN	Zinc finger protein 622 OS=Homo sapiens GN=ZNF622 PE=1 SV=1	1.95	0.5998	0.041046	0	0	0	0	0	0	1	1	1	2	2	2	0	0	0	1	1	1	0	0	0	0	0	0	1	1	1	1	1	1	0	0	0	1	1	1	1	1	1	0	0	0	0	0	0
YTHD1_HUMAN	YTH domain family protein 1 OS=Homo sapiens GN=YTHDF1 PE=1 SV=1	2.288	0.606	0.019956	3	3	0	2	2	0	2	2	0	2	2	0	2	2	0	2	2	0	1	1	0	2	2	0	2	2	0	1	1	0	2	2	0	1	1	0	3	3	0	2	2	0	2	2	0
ANXA3_HUMAN	Annexin A3 OS=Homo sapiens GN=ANXA3 PE=1 SV=3	2.758	0.746	0.007787	7	7	7	0	0	0	6	6	6	7	7	7	1	1	1	9	9	9	0	0	0	1	1	1	4	4	4	2	2	2	1	1	1	2	2	2	4	4	4	0	0	0	1	1	1
PPB1_HUMAN	Alkaline phosphatase, placental type OS=Homo sapiens GN=ALPP PE=1 SV=2	3.075	0.68	0.099857	1	1	0	0	0	0	2	2	1	1	1	0	0	0	0	2	2	1	0	0	0	2	2	1	1	1	0	1	1	1	0	0	0	0	0	0	2	2	1	1	1	0	1	1	0
GNAT3_HUMAN	Guanine nucleotide-binding protein G(t) subunit alpha-3 OS=Homo sapiens GN=GNAT3 PE=2 SV=2	2.329	0.5987	0.003423	1	1	0	1	1	0	0	0	0	1	1	0	0	0	0	1	1	0	0	0	0	0	0	0	0	0	0	0	0	0	0	0	0	0	0	0	1	1	0	0	0	0	0	0	0
TF65_HUMAN	Transcription factor p65 OS=Homo sapiens GN=RELA PE=1 SV=2	1.736	0.2926	1.13503	1	1	1	0	0	0	0	0	0	0	0	0	0	0	0	1	1	1	0	0	0	0	0	0	0	0	0	0	0	0	0	0	0	0	0	0	0	0	0	0	0	0	0	0	0
APT_HUMAN	Adenine phosphoribosyltransferase OS=Homo sapiens GN=APRT PE=1 SV=2	1.942	0.5144	0.297868	0	0	0	0	0	0	0	0	0	0	0	0	0	0	0	1	1	1	0	0	0	0	0	0	0	0	0	0	0	0	0	0	0	0	0	0	0	0	0	0	0	0	0	0	0
CNOT1_HUMAN	CCR4-NOT transcription complex subunit 1 OS=Homo sapiens GN=CNOT1 PE=1 SV=2	1.802	0.4095	0.974446	0	0	0	0	0	0	0	0	0	1	1	1	0	0	0	0	0	0	0	0	0	0	0	0	0	0	0	0	0	0	0	0	0	0	0	0	0	0	0	0	0	0	0	0	0
ACACB_HUMAN	Acetyl-CoA carboxylase 2 OS=Homo sapiens GN=ACACB PE=1 SV=3	1.529	0.5372	0.361151	2	2	0	0	0	0	2	2	0	1	1	0	0	0	0	1	1	0	0	0	0	0	0	0	1	1	0	0	0	0	0	0	0	0	0	0	0	0	0	0	0	0	0	0	0
PKP2_HUMAN	Plakophilin-2 OS=Homo sapiens GN=PKP2 PE=1 SV=2	1.33	0.3218	0.969719	0	0	0	0	0	0	1	1	1	0	0	0	0	0	0	0	0	0	0	0	0	0	0	0	0	0	0	0	0	0	0	0	0	0	0	0	0	0	0	0	0	0	0	0	0
CO8A2_HUMAN	Collagen alpha-2(VIII) chain OS=Homo sapiens GN=COL8A2 PE=1 SV=2	1.288	0.4987	2.47401	0	0	0	0	0	0	0	0	0	1	1	1	0	0	0	1	1	1	1	1	1	1	1	1	0	0	0	0	0	0	0	0	0	0	0	0	0	0	0	1	1	1	0	0	0
ADT4_HUMAN	ADP/ATP translocase 4 OS=Homo sapiens GN=SLC25A31 PE=1 SV=1	2.069	0.473	0.147836	1	1	0	1	1	0	1	1	0	1	1	0	1	1	0	1	1	0	1	1	0	1	1	0	1	1	0	1	1	0	1	1	0	1	1	0	1	1	0	1	1	0	1	1	0
OGT1_HUMAN	UDP-N-acetylglucosamine--peptide N-acetylglucosaminyltransferase 110 kDa subunit OS=Homo sapiens GN=OGT PE=1 SV=3	2.066	0.5798	0.017623	6	6	6	0	0	0	3	3	3	2	2	2	1	1	1	3	3	3	1	1	1	0	0	0	1	1	1	1	1	1	0	0	0	1	1	1	2	2	2	0	0	0	1	1	1
CLH2_HUMAN	Clathrin heavy chain 2 OS=Homo sapiens GN=CLTCL1 PE=1 SV=2	3.176	0.7185	0.035712	7	6	0	5	5	0	7	7	0	5	5	0	2	2	0	5	4	0	0	0	0	1	1	0	4	4	0	2	2	0	2	2	0	1	1	0	3	3	0	0	0	0	1	1	0
PRP6_HUMAN	Pre-mRNA-processing factor 6 OS=Homo sapiens GN=PRPF6 PE=1 SV=1	2.693	0.6862	0.041775	5	5	5	2	2	2	3	3	3	2	2	2	1	1	1	3	3	3	0	0	0	0	0	0	1	1	1	0	0	0	0	0	0	0	0	0	2	2	2	0	0	0	0	0	0
C1QBP_HUMAN	Complement component 1 Q subcomponent-binding protein, mitochondrial OS=Homo sapiens GN=C1QBP PE=1 SV=1	2.577	0.6891	0.026016	3	3	3	0	0	0	3	3	3	1	1	1	1	1	1	1	1	1	0	0	0	1	1	1	1	1	1	1	1	1	0	0	0	1	1	1	1	1	1	0	0	0	0	0	0
TFG_HUMAN	Protein TFG OS=Homo sapiens GN=TFG PE=1 SV=2	2.149	0.5654	0.159399	1	1	1	0	0	0	1	1	1	2	2	2	1	1	1	1	1	1	0	0	0	0	0	0	1	1	1	0	0	0	0	0	0	1	1	1	2	2	2	0	0	0	1	1	1
LYPA1_HUMAN	Acyl-protein thioesterase 1 OS=Homo sapiens GN=LYPLA1 PE=1 SV=1	1.037	0.2681	0.473035	1	1	1	0	0	0	0	0	0	0	0	0	0	0	0	0	0	0	0	0	0	0	0	0	0	0	0	0	0	0	0	0	0	0	0	0	0	0	0	0	0	0	0	0	0
TCPH_HUMAN	T-complex protein 1 subunit eta OS=Homo sapiens GN=CCT7 PE=1 SV=2	2.841	0.7413	0.000272	16	13	13	9	8	8	10	10	10	12	9	9	6	6	6	13	11	11	2	2	2	4	4	4	7	7	7	5	4	4	3	3	3	9	7	7	7	7	7	3	3	3	3	3	3
MAP7_HUMAN	Ensconsin OS=Homo sapiens GN=MAP7 PE=1 SV=1	2.159	0.6628	0.004126	0	0	0	1	1	1	1	1	1	2	2	2	1	1	1	4	4	4	0	0	0	3	3	3	4	4	4	2	2	2	0	0	0	3	3	3	4	4	4	0	0	0	0	0	0
HS74L_HUMAN	Heat shock 70 kDa protein 4L OS=Homo sapiens GN=HSPA4L PE=1 SV=3	2.949	0.747	0.000982	14	14	14	2	2	1	11	11	9	2	2	2	1	1	1	5	5	4	1	1	1	1	1	0	3	3	3	1	1	1	0	0	0	3	3	3	1	1	1	0	0	0	1	1	1
RS17L_HUMAN	40S ribosomal protein S17-like OS=Homo sapiens GN=RPS17L PE=3 SV=1	2.446	0.6241	0.029102	1	1	0	1	1	0	0	0	0	2	2	0	1	1	0	1	1	0	0	0	0	1	1	0	1	1	0	0	0	0	0	0	0	1	1	0	1	1	0	0	0	0	1	1	0
CCNT1_HUMAN	Cyclin-T1 OS=Homo sapiens GN=CCNT1 PE=1 SV=1	2.767	0.6245	0.236204	0	0	0	0	0	0	1	1	1	0	0	0	0	0	0	1	1	1	0	0	0	0	0	0	1	1	1	0	0	0	0	0	0	0	0	0	0	0	0	0	0	0	0	0	0
CIR1A_HUMAN	Cirhin OS=Homo sapiens GN=CIRH1A PE=1 SV=1	1.156	0.2154	0.550066	0	0	0	0	0	0	0	0	0	0	0	0	0	0	0	0	0	0	0	0	0	0	0	0	1	1	1	0	0	0	0	0	0	0	0	0	0	0	0	0	0	0	0	0	0
PA2G4_HUMAN	Proliferation-associated protein 2G4 OS=Homo sapiens GN=PA2G4 PE=1 SV=3	3.026	0.7208	0.011224	12	10	10	3	3	3	11	11	11	12	12	12	5	5	5	14	12	12	4	3	3	5	4	4	6	6	6	7	7	7	3	3	3	6	5	5	10	9	9	5	5	5	4	4	4
IMMT_HUMAN	Mitochondrial inner membrane protein OS=Homo sapiens GN=IMMT PE=1 SV=1	2.219	0.7679	0.008623	7	7	7	2	2	2	1	1	1	4	4	4	1	1	1	5	5	5	2	2	2	1	1	1	3	3	3	0	0	0	0	0	0	1	1	1	6	6	6	0	0	0	1	1	1
PAK2_HUMAN	Serine/threonine-protein kinase PAK 2 OS=Homo sapiens GN=PAK2 PE=1 SV=3	1.23	0.5146	0.632085	0	0	0	0	0	0	0	0	0	1	1	1	0	0	0	0	0	0	0	0	0	0	0	0	0	0	0	0	0	0	0	0	0	0	0	0	0	0	0	0	0	0	0	0	0
ZBT42_HUMAN	Zinc finger and BTB domain-containing protein 42 OS=Homo sapiens GN=ZBTB42 PE=2 SV=2	1.246	0.2512	0.755052	0	0	0	0	0	0	0	0	0	0	0	0	0	0	0	0	0	0	0	0	0	0	0	0	0	0	0	0	0	0	0	0	0	0	0	0	0	0	0	0	0	0	0	0	0
SERC_HUMAN	Phosphoserine aminotransferase OS=Homo sapiens GN=PSAT1 PE=1 SV=2	2.317	0.6793	0.031729	4	4	4	1	1	1	6	6	6	4	4	4	2	2	2	5	5	5	0	0	0	1	1	1	2	2	2	2	2	2	2	2	2	4	4	4	6	5	5	2	2	2	2	2	2
CPVL_HUMAN	Probable serine carboxypeptidase CPVL OS=Homo sapiens GN=CPVL PE=1 SV=2	1.92	0.4161	0.46567	0	0	0	0	0	0	1	1	1	0	0	0	0	0	0	0	0	0	0	0	0	0	0	0	0	0	0	0	0	0	0	0	0	0	0	0	0	0	0	0	0	0	0	0	0
WRIP1_HUMAN	ATPase WRNIP1 OS=Homo sapiens GN=WRNIP1 PE=1 SV=2	2.075	0.5749	0.128452	3	3	3	1	1	1	2	2	2	1	1	1	0	0	0	1	1	1	0	0	0	0	0	0	0	0	0	0	0	0	0	0	0	0	0	0	0	0	0	0	0	0	0	0	0
DNPEP_HUMAN	Aspartyl aminopeptidase OS=Homo sapiens GN=DNPEP PE=1 SV=1	2.409	0.5882	0.238435	1	1	1	0	0	0	0	0	0	1	1	1	0	0	0	0	0	0	0	0	0	0	0	0	0	0	0	1	1	1	0	0	0	0	0	0	0	0	0	0	0	0	0	0	0
H2A1D_HUMAN	Histone H2A type 1-D OS=Homo sapiens GN=HIST1H2AD PE=1 SV=2	2.554	0.6141	0.003833	4	3	0	5	3	0	3	2	0	10	4	0	11	4	0	8	4	0	15	2	0	11	3	0	12	5	0	6	2	0	1	1	0	12	4	0	8	3	0	4	1	0	6	1	0
HSPB8_HUMAN	Heat shock protein beta-8 OS=Homo sapiens GN=HSPB8 PE=1 SV=1	2.122	0.4779	0.017324	3	3	3	0	0	0	2	2	2	1	1	1	1	1	1	1	1	1	1	1	1	1	1	1	1	1	1	1	1	1	0	0	0	1	1	1	1	1	1	0	0	0	1	1	1
RENT1_HUMAN	Regulator of nonsense transcripts 1 OS=Homo sapiens GN=UPF1 PE=1 SV=2	2.229	0.5734	0.058592	2	2	2	1	1	1	4	4	4	2	2	2	1	1	1	2	2	2	1	1	1	0	0	0	3	3	3	0	0	0	1	1	1	2	2	2	0	0	0	1	1	1	0	0	0
HPRT_HUMAN	Hypoxanthine-guanine phosphoribosyltransferase OS=Homo sapiens GN=HPRT1 PE=1 SV=2	2.495	0.7491	0.081039	2	2	2	1	1	1	3	3	3	1	1	1	1	1	1	3	2	2	0	0	0	0	0	0	1	1	1	1	1	1	0	0	0	0	0	0	1	1	1	0	0	0	0	0	0
FRG1_HUMAN	Protein FRG1 OS=Homo sapiens GN=FRG1 PE=1 SV=1	2.203	0.6285	0.001583	1	1	0	0	0	0	2	2	1	1	1	0	1	1	1	3	3	2	1	1	1	1	1	0	0	0	0	1	1	0	2	2	1	1	1	0	1	1	0	0	0	0	0	0	0
IMA3_HUMAN	Importin subunit alpha-3 OS=Homo sapiens GN=KPNA3 PE=1 SV=2	1.786	0.2982	0.571401	0	0	0	0	0	0	0	0	0	0	0	0	0	0	0	0	0	0	0	0	0	1	1	0	1	1	0	0	0	0	0	0	0	1	1	0	0	0	0	0	0	0	1	1	0
IF4G1_HUMAN	Eukaryotic translation initiation factor 4 gamma 1 OS=Homo sapiens GN=EIF4G1 PE=1 SV=4	2.708	0.6951	0.000369	2	2	2	1	1	1	2	2	2	7	7	7	4	4	4	7	7	7	1	1	1	3	3	3	5	5	5	2	2	2	0	0	0	3	3	3	5	5	5	0	0	0	3	3	3
F120A_HUMAN	Constitutive coactivator of PPAR-gamma-like protein 1 OS=Homo sapiens GN=FAM120A PE=1 SV=2	2.317	0.7458	0.1244	1	1	1	1	1	1	2	2	1	1	1	1	1	1	1	3	3	3	0	0	0	0	0	0	2	2	2	0	0	0	0	0	0	1	1	1	1	1	1	0	0	0	0	0	0
RL27A_HUMAN	60S ribosomal protein L27a OS=Homo sapiens GN=RPL27A PE=1 SV=2	2.367	0.7067	0.023047	2	2	2	1	1	1	0	0	0	2	2	2	1	1	1	1	1	1	0	0	0	1	1	1	2	2	2	2	2	2	0	0	0	0	0	0	2	2	2	0	0	0	0	0	0
SPTN2_HUMAN	Spectrin beta chain, non-erythrocytic 2 OS=Homo sapiens GN=SPTBN2 PE=1 SV=3	1.374	0.4061	0.250954	1	1	0	1	1	0	1	1	0	1	1	0	0	0	0	0	0	0	0	0	0	0	0	0	0	0	0	0	0	0	0	0	0	0	0	0	1	1	0	0	0	0	0	0	0
SYMC_HUMAN	Methionine--tRNA ligase, cytoplasmic OS=Homo sapiens GN=MARS PE=1 SV=2	3.53	0.6929	0.006066	20	15	15	11	8	8	17	16	16	5	5	5	3	3	3	6	6	6	1	1	1	1	1	1	5	5	5	2	2	2	0	0	0	3	3	3	4	4	4	1	1	1	3	3	3
SODC_HUMAN	Superoxide dismutase [Cu-Zn] OS=Homo sapiens GN=SOD1 PE=1 SV=2	3.647	0.7286	0.023352	2	2	2	1	1	1	0	0	0	2	2	2	3	3	3	2	2	2	1	1	1	1	1	1	3	3	3	1	1	1	2	2	2	2	2	2	2	2	2	2	2	2	2	2	2
OLA1_HUMAN	Obg-like ATPase 1 OS=Homo sapiens GN=OLA1 PE=1 SV=2	2.751	0.6503	0.065433	3	3	3	0	0	0	3	3	3	4	4	4	2	2	2	2	2	2	0	0	0	2	2	2	3	3	3	1	1	1	0	0	0	1	1	1	1	1	1	2	2	2	1	1	1
SCOT1_HUMAN	Succinyl-CoA:3-ketoacid coenzyme A transferase 1, mitochondrial OS=Homo sapiens GN=OXCT1 PE=1 SV=1	2.944	0.689	0.023591	5	5	5	0	0	0	3	3	3	5	4	4	2	2	2	7	6	6	2	2	2	3	3	3	6	6	6	5	5	5	0	0	0	7	7	7	5	4	4	4	4	4	4	4	4
BOREA_HUMAN	Borealin OS=Homo sapiens GN=CDCA8 PE=1 SV=2	2.142	0.6062	0.100838	0	0	0	0	0	0	0	0	0	1	1	1	0	0	0	0	0	0	0	0	0	1	1	1	1	1	1	0	0	0	0	0	0	0	0	0	0	0	0	0	0	0	0	0	0
P66B_HUMAN	Transcriptional repressor p66-beta OS=Homo sapiens GN=GATAD2B PE=1 SV=1	2.572	0.6485	0.024335	1	1	0	0	0	0	1	1	0	1	1	0	1	1	0	1	1	0	0	0	0	1	1	0	1	1	0	1	1	0	1	1	0	1	1	0	1	1	0	0	0	0	0	0	0
TSN_HUMAN	Translin OS=Homo sapiens GN=TSN PE=1 SV=1	1.568	0.4464	0.999891	1	1	1	0	0	0	0	0	0	1	1	1	0	0	0	1	1	1	0	0	0	0	0	0	0	0	0	0	0	0	0	0	0	0	0	0	1	1	1	0	0	0	0	0	0
PACN2_HUMAN	Protein kinase C and casein kinase substrate in neurons protein 2 OS=Homo sapiens GN=PACSIN2 PE=1 SV=2	2.316	0.44	0.17106	0	0	0	0	0	0	0	0	0	1	1	1	0	0	0	1	1	1	1	1	1	0	0	0	0	0	0	0	0	0	0	0	0	0	0	0	3	3	3	0	0	0	1	1	1
AT1B3_HUMAN	Sodium/potassium-transporting ATPase subunit beta-3 OS=Homo sapiens GN=ATP1B3 PE=1 SV=1	1.912	0.3933	1.00056	0	0	0	0	0	0	0	0	0	0	0	0	0	0	0	0	0	0	0	0	0	0	0	0	0	0	0	0	0	0	0	0	0	0	0	0	0	0	0	0	0	0	1	1	1
TRI33_HUMAN	E3 ubiquitin-protein ligase TRIM33 OS=Homo sapiens GN=TRIM33 PE=1 SV=3	1.122	0.2683	1.75518	0	0	0	0	0	0	0	0	0	0	0	0	0	0	0	0	0	0	0	0	0	0	0	0	0	0	0	0	0	0	0	0	0	0	0	0	0	0	0	0	0	0	0	0	0
FER_HUMAN	Tyrosine-protein kinase Fer OS=Homo sapiens GN=FER PE=1 SV=2	1.257	0.2036	0.742966	0	0	0	0	0	0	0	0	0	0	0	0	0	0	0	0	0	0	1	1	1	0	0	0	0	0	0	1	1	1	0	0	0	0	0	0	0	0	0	0	0	0	0	0	0
T11L1_HUMAN	T-complex protein 11-like protein 1 OS=Homo sapiens GN=TCP11L1 PE=1 SV=1	1.357	0.2218	0.564251	1	1	1	0	0	0	0	0	0	0	0	0	0	0	0	0	0	0	0	0	0	0	0	0	0	0	0	0	0	0	0	0	0	0	0	0	0	0	0	0	0	0	0	0	0
DHX9_HUMAN	ATP-dependent RNA helicase A OS=Homo sapiens GN=DHX9 PE=1 SV=4	3.318	0.7212	0.002263	14	14	14	16	15	15	18	18	18	17	16	16	11	10	10	20	20	20	7	7	7	8	8	8	14	14	14	13	12	12	6	6	6	15	13	13	11	10	10	4	4	4	13	12	12
TBA4A_HUMAN	Tubulin alpha-4A chain OS=Homo sapiens GN=TUBA4A PE=1 SV=1	4	0.7583	0.00129	66	17	3	25	11	3	53	20	3	36	14	2	16	11	1	33	13	2	18	7	1	17	10	2	24	13	2	28	13	2	11	9	2	18	10	2	33	14	2	12	8	2	14	8	1
H2A3_HUMAN	Histone H2A type 3 OS=Homo sapiens GN=HIST3H2A PE=1 SV=3	2.554	0.4727	0.003833	4	3	0	5	3	0	3	2	0	10	4	0	11	4	0	8	4	0	15	2	0	11	3	0	11	4	0	6	2	0	1	1	0	12	4	0	8	3	0	4	1	0	6	1	0
ERBB4_HUMAN	Receptor tyrosine-protein kinase erbB-4 OS=Homo sapiens GN=ERBB4 PE=1 SV=1	2.146	0.6421	0.975784	0	0	0	0	0	0	1	1	0	0	0	0	0	0	0	0	0	0	0	0	0	0	0	0	0	0	0	0	0	0	0	0	0	0	0	0	0	0	0	0	0	0	0	0	0
AN32C_HUMAN	Acidic leucine-rich nuclear phosphoprotein 32 family member C OS=Homo sapiens GN=ANP32C PE=2 SV=1	2.084	0.5082	0.144373	1	1	0	0	0	0	1	1	0	0	0	0	1	1	0	1	1	0	0	0	0	1	1	0	2	2	0	0	0	0	0	0	0	1	1	0	0	0	0	1	1	0	1	1	0
RAB15_HUMAN	Ras-related protein Rab-15 OS=Homo sapiens GN=RAB15 PE=1 SV=1	2.392	0.4974	0.012709	1	1	0	0	0	0	1	1	0	1	1	0	0	0	0	1	1	0	0	0	0	0	0	0	0	0	0	0	0	0	0	0	0	0	0	0	1	1	0	0	0	0	0	0	0
DC1L1_HUMAN	Cytoplasmic dynein 1 light intermediate chain 1 OS=Homo sapiens GN=DYNC1LI1 PE=1 SV=3	2.446	0.6672	0.09141	1	1	1	0	0	0	0	0	0	1	1	1	0	0	0	1	1	1	0	0	0	0	0	0	0	0	0	0	0	0	0	0	0	0	0	0	1	1	1	0	0	0	0	0	0
PDC10_HUMAN	Programmed cell death protein 10 OS=Homo sapiens GN=PDCD10 PE=1 SV=1	1.409	0.4237	1.55553	1	1	1	0	0	0	0	0	0	0	0	0	0	0	0	0	0	0	0	0	0	0	0	0	0	0	0	0	0	0	0	0	0	0	0	0	0	0	0	0	0	0	0	0	0
WBP11_HUMAN	WW domain-binding protein 11 OS=Homo sapiens GN=WBP11 PE=1 SV=1	2.207	0.6312	0.003905	0	0	0	0	0	0	0	0	0	0	0	0	0	0	0	0	0	0	0	0	0	0	0	0	1	1	1	1	1	1	0	0	0	1	1	1	1	1	1	0	0	0	0	0	0
CRKL_HUMAN	Crk-like protein OS=Homo sapiens GN=CRKL PE=1 SV=1	2.544	0.6599	0.021622	6	6	6	0	0	0	4	4	4	6	4	4	1	1	1	2	2	2	2	2	2	2	2	2	4	4	4	3	2	2	1	1	1	4	3	3	4	4	4	1	1	1	3	3	3
CABP7_HUMAN	Calcium-binding protein 7 OS=Homo sapiens GN=CABP7 PE=1 SV=1	1.541	0.2304	0.220657	0	0	0	0	0	0	0	0	0	1	1	1	0	0	0	1	1	1	0	0	0	0	0	0	0	0	0	0	0	0	0	0	0	0	0	0	1	1	1	0	0	0	0	0	0
NOLC1_HUMAN	Nucleolar and coiled-body phosphoprotein 1 OS=Homo sapiens GN=NOLC1 PE=1 SV=2	2.953	0.6277	0.002285	4	4	4	2	2	2	4	4	4	7	6	6	7	6	6	6	5	5	5	5	5	10	9	9	18	16	16	3	3	3	1	1	1	11	9	9	5	5	5	4	4	4	5	5	5
CMC1_HUMAN	Calcium-binding mitochondrial carrier protein Aralar1 OS=Homo sapiens GN=SLC25A12 PE=1 SV=2	1.558	0.4037	0.007659	1	1	0	1	1	0	0	0	0	0	0	0	0	0	0	0	0	0	0	0	0	0	0	0	0	0	0	0	0	0	0	0	0	0	0	0	0	0	0	0	0	0	0	0	0
ADK_HUMAN	Adenosine kinase OS=Homo sapiens GN=ADK PE=1 SV=2	2.057	0.3931	0.262582	3	3	3	0	0	0	1	1	1	0	0	0	1	1	1	1	1	1	0	0	0	0	0	0	0	0	0	0	0	0	0	0	0	0	0	0	0	0	0	0	0	0	0	0	0
ATPA_HUMAN	ATP synthase subunit alpha, mitochondrial OS=Homo sapiens GN=ATP5A1 PE=1 SV=1	3.592	0.752	0.000674	21	18	18	15	14	14	19	17	17	21	19	19	10	9	9	23	18	18	7	7	7	12	11	11	15	14	14	16	15	15	11	10	10	13	11	11	18	14	14	7	7	7	11	10	10
DDB1_HUMAN	DNA damage-binding protein 1 OS=Homo sapiens GN=DDB1 PE=1 SV=1	2.402	0.7243	0.00341	11	11	11	3	3	3	8	8	8	8	8	8	3	3	3	7	7	7	0	0	0	4	4	4	6	6	6	3	3	3	3	3	3	4	4	4	3	3	3	2	2	2	2	2	2
EZRI_HUMAN	Ezrin OS=Homo sapiens GN=EZR PE=1 SV=4	3.679	0.7181	0.005015	18	17	7	3	3	1	14	13	5	17	15	7	9	8	3	19	17	7	4	4	3	4	4	3	12	11	5	6	6	3	7	7	2	13	12	5	15	11	5	3	3	1	5	5	2
IMPA2_HUMAN	Inositol monophosphatase 2 OS=Homo sapiens GN=IMPA2 PE=1 SV=1	1.265	0.3542	0.734798	0	0	0	0	0	0	0	0	0	0	0	0	0	0	0	0	0	0	0	0	0	1	1	1	0	0	0	0	0	0	0	0	0	0	0	0	0	0	0	0	0	0	0	0	0
PYC_HUMAN	Pyruvate carboxylase, mitochondrial OS=Homo sapiens GN=PC PE=1 SV=2	1.539	0.4199	0.455547	0	0	0	0	0	0	0	0	0	0	0	0	0	0	0	1	1	1	0	0	0	0	0	0	1	1	1	0	0	0	0	0	0	0	0	0	0	0	0	0	0	0	0	0	0
ANR17_HUMAN	Ankyrin repeat domain-containing protein 17 OS=Homo sapiens GN=ANKRD17 PE=1 SV=3	1.508	0.6744	0.395044	0	0	0	0	0	0	0	0	0	0	0	0	0	0	0	1	1	0	0	0	0	0	0	0	0	0	0	0	0	0	0	0	0	0	0	0	0	0	0	0	0	0	0	0	0
DD19A_HUMAN	ATP-dependent RNA helicase DDX19A OS=Homo sapiens GN=DDX19A PE=1 SV=1	1.601	0.5578	0.018427	3	3	0	0	0	0	1	1	1	1	1	0	0	0	0	1	1	0	0	0	0	0	0	0	1	1	0	0	0	0	0	0	0	0	0	0	1	1	0	0	0	0	0	0	0
CHSP1_HUMAN	Calcium-regulated heat stable protein 1 OS=Homo sapiens GN=CARHSP1 PE=1 SV=2	1.231	0.2981	0.489706	0	0	0	0	0	0	0	0	0	0	0	0	0	0	0	0	0	0	0	0	0	0	0	0	1	1	1	0	0	0	0	0	0	0	0	0	0	0	0	0	0	0	0	0	0
RAC3_HUMAN	Ras-related C3 botulinum toxin substrate 3 OS=Homo sapiens GN=RAC3 PE=1 SV=1	1.868	0.4802	0.013025	2	2	0	0	0	0	0	0	0	2	2	0	1	1	0	2	2	0	0	0	0	0	0	0	2	2	0	0	0	0	0	0	0	2	2	0	2	2	0	0	0	0	1	1	0
NKAPL_HUMAN	NKAP-like protein OS=Homo sapiens GN=NKAPL PE=1 SV=3	1.132	0.2641	1.34001	0	0	0	1	1	0	0	0	0	0	0	0	0	0	0	0	0	0	0	0	0	0	0	0	0	0	0	0	0	0	0	0	0	0	0	0	0	0	0	0	0	0	0	0	0
PPIA_HUMAN	Peptidyl-prolyl cis-trans isomerase A OS=Homo sapiens GN=PPIA PE=1 SV=2	2.491	0.6817	0.005526	13	9	6	5	4	2	18	14	11	12	7	4	9	5	2	15	9	6	6	3	1	10	5	2	14	8	5	13	6	3	4	3	1	11	6	3	16	8	5	8	3	1	10	5	2
PDS5A_HUMAN	Sister chromatid cohesion protein PDS5 homolog A OS=Homo sapiens GN=PDS5A PE=1 SV=1	2.603	0.6539	0.049017	4	4	4	3	3	3	3	3	3	3	3	3	0	0	0	3	3	3	0	0	0	0	0	0	1	1	1	0	0	0	0	0	0	1	1	1	2	2	2	0	0	0	0	0	0
MRT4_HUMAN	mRNA turnover protein 4 homolog OS=Homo sapiens GN=MRTO4 PE=1 SV=2	2.009	0.6893	0.017529	0	0	0	0	0	0	1	1	1	1	1	1	2	2	2	3	3	3	0	0	0	3	3	3	2	2	2	1	1	1	0	0	0	3	3	3	1	1	1	0	0	0	1	1	1
TBB8_HUMAN	Tubulin beta-8 chain OS=Homo sapiens GN=TUBB8 PE=1 SV=2	3.788	0.717	0.005855	22	8	0	36	8	0	31	10	0	25	7	0	22	6	0	20	7	0	15	5	0	17	5	0	20	6	0	23	5	0	16	6	0	21	6	0	23	5	0	19	4	0	16	5	0
SC23B_HUMAN	Protein transport protein Sec23B OS=Homo sapiens GN=SEC23B PE=1 SV=2	1.979	0.5452	0.001981	1	1	1	1	1	1	1	1	1	1	1	1	1	1	1	1	1	1	0	0	0	0	0	0	1	1	1	0	0	0	0	0	0	0	0	0	1	1	1	0	0	0	0	0	0
LUZP1_HUMAN	Leucine zipper protein 1 OS=Homo sapiens GN=LUZP1 PE=1 SV=2	1.466	0.5532	0.009458	0	0	0	0	0	0	0	0	0	0	0	0	0	0	0	0	0	0	0	0	0	0	0	0	2	2	2	0	0	0	0	0	0	0	0	0	0	0	0	0	0	0	0	0	0
HNRH3_HUMAN	Heterogeneous nuclear ribonucleoprotein H3 OS=Homo sapiens GN=HNRNPH3 PE=1 SV=2	3.326	0.7734	0.006289	7	6	6	7	6	6	7	6	6	8	6	6	7	6	6	10	8	8	3	3	3	5	4	4	10	8	8	6	5	5	4	4	4	7	6	6	8	6	6	4	4	4	6	5	5
RUXF_HUMAN	Small nuclear ribonucleoprotein F OS=Homo sapiens GN=SNRPF PE=1 SV=1	2.606	0.7443	0.060106	1	1	1	1	1	1	1	1	1	1	1	1	0	0	0	0	0	0	1	1	1	1	1	1	0	0	0	1	1	1	1	1	1	0	0	0	1	1	1	1	1	1	1	1	1
TMA7_HUMAN	Translation machinery-associated protein 7 OS=Homo sapiens GN=TMA7 PE=1 SV=1	1.604	0.2332	1.144	0	0	0	0	0	0	1	1	1	0	0	0	0	0	0	0	0	0	0	0	0	0	0	0	0	0	0	0	0	0	0	0	0	0	0	0	0	0	0	0	0	0	0	0	0
ADT1_HUMAN	ADP/ATP translocase 1 OS=Homo sapiens GN=SLC25A4 PE=1 SV=4	2.069	0.6122	0.147836	4	4	0	1	1	0	1	1	0	1	1	0	1	1	0	2	2	0	1	1	0	1	1	0	1	1	0	1	1	0	1	1	0	1	1	0	1	1	0	1	1	0	1	1	0
DDX4_HUMAN	Probable ATP-dependent RNA helicase DDX4 OS=Homo sapiens GN=DDX4 PE=1 SV=2	2.133	0.4964	0.032353	1	1	0	0	0	0	1	1	0	1	1	0	1	1	0	1	1	0	0	0	0	0	0	0	1	1	0	1	1	0	0	0	0	1	1	0	1	1	0	0	0	0	0	0	0
RAB3B_HUMAN	Ras-related protein Rab-3B OS=Homo sapiens GN=RAB3B PE=1 SV=2	1.174	0.47	0.052989	0	0	0	0	0	0	0	0	0	1	1	0	0	0	0	1	1	0	0	0	0	0	0	0	0	0	0	0	0	0	0	0	0	0	0	0	1	1	0	0	0	0	0	0	0
PTMS_HUMAN	Parathymosin OS=Homo sapiens GN=PTMS PE=1 SV=2	2.408	0.5012	0.5144	0	0	0	0	0	0	0	0	0	0	0	0	0	0	0	0	0	0	0	0	0	0	0	0	0	0	0	0	0	0	0	0	0	0	0	0	0	0	0	1	1	1	0	0	0
IMA2_HUMAN	Importin subunit alpha-2 OS=Homo sapiens GN=KPNA2 PE=1 SV=1	3.474	0.7644	0.090681	5	5	5	3	3	3	8	8	8	6	6	6	2	2	2	6	6	6	0	0	0	0	0	0	5	5	5	2	2	2	1	1	1	3	3	3	3	3	3	0	0	0	0	0	0
TMED7_HUMAN	Transmembrane emp24 domain-containing protein 7 OS=Homo sapiens GN=TMED7 PE=1 SV=2	1.493	0.2405	1.32256	0	0	0	0	0	0	0	0	0	0	0	0	0	0	0	0	0	0	0	0	0	0	0	0	0	0	0	0	0	0	0	0	0	1	1	1	0	0	0	0	0	0	0	0	0
LKHA4_HUMAN	Leukotriene A-4 hydrolase OS=Homo sapiens GN=LTA4H PE=1 SV=2	1.991	0.7514	0.107833	5	5	5	0	0	0	1	1	1	4	4	4	1	1	1	5	5	5	0	0	0	0	0	0	3	3	3	3	3	3	0	0	0	1	1	1	2	2	2	0	0	0	0	0	0
DDX6_HUMAN	Probable ATP-dependent RNA helicase DDX6 OS=Homo sapiens GN=DDX6 PE=1 SV=2	2.865	0.7283	0.106126	2	2	2	0	0	0	1	1	1	1	1	1	0	0	0	1	1	1	0	0	0	0	0	0	0	0	0	0	0	0	0	0	0	0	0	0	1	1	1	0	0	0	0	0	0
SYSM_HUMAN	Serine--tRNA ligase, mitochondrial OS=Homo sapiens GN=SARS2 PE=1 SV=1	1.711	0.232	1.32693	0	0	0	0	0	0	0	0	0	0	0	0	0	0	0	0	0	0	0	0	0	0	0	0	0	0	0	0	0	0	0	0	0	0	0	0	0	0	0	0	0	0	0	0	0
MAGBH_HUMAN	Melanoma-associated antigen B17 OS=Homo sapiens GN=MAGEB17 PE=4 SV=2	1.594	0.4737	0.583009	1	1	0	0	0	0	0	0	0	0	0	0	0	0	0	0	0	0	0	0	0	0	0	0	0	0	0	0	0	0	0	0	0	0	0	0	0	0	0	0	0	0	0	0	0
ABCD2_HUMAN	ATP-binding cassette sub-family D member 2 OS=Homo sapiens GN=ABCD2 PE=1 SV=1	1.22	0.2918	1.79944	1	1	0	0	0	0	0	0	0	0	0	0	0	0	0	0	0	0	0	0	0	0	0	0	0	0	0	0	0	0	0	0	0	0	0	0	0	0	0	0	0	0	0	0	0
RL30_HUMAN	60S ribosomal protein L30 OS=Homo sapiens GN=RPL30 PE=1 SV=2	1.948	0.6552	0.012343	5	4	4	6	6	6	5	5	5	4	4	4	4	3	3	4	4	4	4	3	3	2	2	2	3	3	3	2	2	2	3	3	3	4	4	4	5	5	5	3	3	3	3	3	3
CNN2_HUMAN	Calponin-2 OS=Homo sapiens GN=CNN2 PE=1 SV=4	2.581	0.6573	0.037093	5	5	3	5	5	4	5	5	4	6	6	4	4	4	3	4	4	3	2	2	2	4	4	4	4	4	3	6	6	4	2	2	2	4	4	3	6	6	4	2	2	2	3	3	3
CTND1_HUMAN	Catenin delta-1 OS=Homo sapiens GN=CTNND1 PE=1 SV=1	1.093	0.2598	0.205953	0	0	0	0	0	0	0	0	0	0	0	0	0	0	0	0	0	0	0	0	0	0	0	0	1	1	1	0	0	0	0	0	0	0	0	0	0	0	0	0	0	0	0	0	0
PDE8B_HUMAN	High affinity cAMP-specific and IBMX-insensitive 3',5'-cyclic phosphodiesterase 8B OS=Homo sapiens GN=PDE8B PE=1 SV=2	1.401	0.2165	0.292994	2	1	1	0	0	0	2	1	1	2	1	1	0	0	0	0	0	0	2	1	1	1	1	1	1	1	1	3	1	1	0	0	0	1	1	1	1	1	1	0	0	0	0	0	0
SODM_HUMAN	Superoxide dismutase [Mn], mitochondrial OS=Homo sapiens GN=SOD2 PE=1 SV=2	2.896	0.6001	0.463881	1	1	1	0	0	0	2	2	2	2	2	2	0	0	0	0	0	0	0	0	0	0	0	0	0	0	0	0	0	0	0	0	0	0	0	0	1	1	1	0	0	0	0	0	0
RT25_HUMAN	28S ribosomal protein S25, mitochondrial OS=Homo sapiens GN=MRPS25 PE=1 SV=1	1.172	0.292	0.204705	1	1	1	0	0	0	0	0	0	0	0	0	0	0	0	0	0	0	0	0	0	0	0	0	0	0	0	0	0	0	0	0	0	0	0	0	0	0	0	0	0	0	0	0	0
CBX3_HUMAN	Chromobox protein homolog 3 OS=Homo sapiens GN=CBX3 PE=1 SV=4	3.117	0.726	0.005644	4	4	4	2	2	2	3	3	3	3	3	3	3	3	3	3	3	3	0	0	0	3	3	3	3	3	3	1	1	1	0	0	0	3	3	3	1	1	1	0	0	0	2	2	2
STOM_HUMAN	Erythrocyte band 7 integral membrane protein OS=Homo sapiens GN=STOM PE=1 SV=3	2.168	0.6967	0.057281	3	3	3	0	0	0	2	2	2	2	2	2	1	1	1	4	4	4	0	0	0	2	2	2	2	2	2	2	2	2	1	1	1	2	2	2	2	2	2	1	1	1	2	2	2
WDR12_HUMAN	Ribosome biogenesis protein WDR12 OS=Homo sapiens GN=WDR12 PE=1 SV=2	3.286	0.6862	0.001504	4	4	4	2	2	2	1	1	1	3	3	3	2	2	2	3	3	3	1	1	1	2	2	2	3	3	3	2	2	2	1	1	1	2	2	2	3	3	3	1	1	1	2	2	2
EDC4_HUMAN	Enhancer of mRNA-decapping protein 4 OS=Homo sapiens GN=EDC4 PE=1 SV=1	1.527	0.3473	0.428772	0	0	0	0	0	0	2	2	2	0	0	0	0	0	0	0	0	0	0	0	0	0	0	0	0	0	0	0	0	0	0	0	0	0	0	0	0	0	0	0	0	0	0	0	0
HUWE1_HUMAN	E3 ubiquitin-protein ligase HUWE1 OS=Homo sapiens GN=HUWE1 PE=1 SV=3	2.65	0.7569	0.007947	9	9	9	3	3	3	4	4	4	2	2	2	0	0	0	4	4	4	0	0	0	0	0	0	1	1	1	1	1	1	0	0	0	0	0	0	0	0	0	0	0	0	0	0	0
SPTN1_HUMAN	Spectrin alpha chain, non-erythrocytic 1 OS=Homo sapiens GN=SPTAN1 PE=1 SV=3	4.354	0.7146	0.003148	38	37	37	13	13	13	28	28	28	16	16	16	10	10	10	16	16	16	5	5	5	8	8	8	20	20	20	7	7	7	5	5	5	11	11	11	19	19	18	2	2	2	12	12	12
G6PD_HUMAN	Glucose-6-phosphate 1-dehydrogenase OS=Homo sapiens GN=G6PD PE=1 SV=4	3.269	0.7987	0.003877	10	9	9	5	5	5	16	14	14	11	10	10	5	5	5	13	11	11	4	4	4	5	5	5	10	10	10	7	7	7	7	7	7	8	7	7	7	7	7	6	6	6	5	4	4
AKP8L_HUMAN	A-kinase anchor protein 8-like OS=Homo sapiens GN=AKAP8L PE=1 SV=3	1.516	0.4749	1.06273	0	0	0	0	0	0	0	0	0	0	0	0	0	0	0	0	0	0	0	0	0	0	0	0	0	0	0	0	0	0	0	0	0	0	0	0	1	1	1	0	0	0	0	0	0
EF1A2_HUMAN	Elongation factor 1-alpha 2 OS=Homo sapiens GN=EEF1A2 PE=1 SV=1	3.317	0.7346	0.000339	14	8	0	30	8	0	22	9	0	17	7	0	23	8	0	28	8	0	44	7	0	36	7	0	20	7	0	38	7	0	33	7	0	27	7	0	30	7	0	27	7	0	35	7	0
RSMN_HUMAN	Small nuclear ribonucleoprotein-associated protein N OS=Homo sapiens GN=SNRPN PE=1 SV=1	2.011	0.7539	0.229428	2	2	0	0	0	0	2	2	0	2	2	0	0	0	0	1	1	0	0	0	0	0	0	0	1	1	0	0	0	0	0	0	0	0	0	0	0	0	0	0	0	0	0	0	0
FKBP5_HUMAN	Peptidyl-prolyl cis-trans isomerase FKBP5 OS=Homo sapiens GN=FKBP5 PE=1 SV=2	1.214	0.1689	1.45914	0	0	0	0	0	0	0	0	0	1	1	0	0	0	0	0	0	0	0	0	0	0	0	0	0	0	0	0	0	0	0	0	0	0	0	0	0	0	0	0	0	0	0	0	0
CB047_HUMAN	Uncharacterized protein C2orf47, mitochondrial OS=Homo sapiens GN=C2orf47 PE=1 SV=1	2.065	0.4295	0.309599	0	0	0	0	0	0	1	1	1	0	0	0	0	0	0	0	0	0	0	0	0	0	0	0	0	0	0	0	0	0	0	0	0	0	0	0	0	0	0	0	0	0	0	0	0
CALU_HUMAN	Calumenin OS=Homo sapiens GN=CALU PE=1 SV=2	3.165	0.6745	0.133457	4	4	4	0	0	0	3	3	3	4	4	4	2	2	2	2	2	2	0	0	0	1	1	1	5	5	5	2	2	2	0	0	0	1	1	1	3	3	3	0	0	0	2	2	2
ALDOB_HUMAN	Fructose-bisphosphate aldolase B OS=Homo sapiens GN=ALDOB PE=1 SV=2	1.91	0.2977	0.500844	1	1	0	0	0	0	1	1	0	1	1	0	1	1	0	2	1	0	1	1	0	0	0	0	1	1	0	1	1	0	1	1	0	1	1	0	1	1	0	1	1	0	1	1	0
BABA1_HUMAN	BRISC and BRCA1-A complex member 1 OS=Homo sapiens GN=BABAM1 PE=1 SV=1	2.184	0.5549	0.013346	1	1	1	0	0	0	2	2	2	0	0	0	0	0	0	0	0	0	0	0	0	0	0	0	1	1	1	1	1	1	0	0	0	0	0	0	0	0	0	0	0	0	0	0	0
ENOA_HUMAN	Alpha-enolase OS=Homo sapiens GN=ENO1 PE=1 SV=2	4.574	0.7825	0.004643	43	24	23	17	10	9	35	23	22	40	22	20	26	14	13	42	23	21	34	10	9	22	13	11	31	18	16	36	16	15	13	10	10	31	17	15	45	19	18	19	9	9	25	13	11
H2AX_HUMAN	Histone H2A.x OS=Homo sapiens GN=H2AFX PE=1 SV=2	2.554	0.4727	0.003833	4	3	0	5	3	0	3	2	0	10	4	1	10	3	0	8	4	1	15	2	0	11	3	1	12	5	2	6	2	0	1	1	0	12	4	1	8	3	0	4	1	0	6	1	0
TBL1X_HUMAN	F-box-like/WD repeat-containing protein TBL1X OS=Homo sapiens GN=TBL1X PE=1 SV=3	1.657	0.5015	0.53508	0	0	0	1	1	0	1	1	0	0	0	0	0	0	0	0	0	0	0	0	0	0	0	0	1	1	0	0	0	0	0	0	0	0	0	0	0	0	0	0	0	0	0	0	0
SGTA_HUMAN	Small glutamine-rich tetratricopeptide repeat-containing protein alpha OS=Homo sapiens GN=SGTA PE=1 SV=1	1.366	0.448	0.279626	1	1	1	0	0	0	0	0	0	0	0	0	0	0	0	1	1	1	0	0	0	0	0	0	0	0	0	0	0	0	0	0	0	0	0	0	0	0	0	0	0	0	0	0	0
G3P_HUMAN	Glyceraldehyde-3-phosphate dehydrogenase OS=Homo sapiens GN=GAPDH PE=1 SV=3	3.584	0.8237	0.00046	26	19	18	13	11	11	30	20	18	37	21	19	24	14	13	37	23	21	19	10	9	18	10	9	21	15	14	27	12	11	19	12	10	22	13	12	31	14	13	19	12	11	23	12	11
S23IP_HUMAN	SEC23-interacting protein OS=Homo sapiens GN=SEC23IP PE=1 SV=1	2.375	0.4067	0.116431	1	1	1	0	0	0	0	0	0	0	0	0	0	0	0	0	0	0	0	0	0	0	0	0	0	0	0	0	0	0	0	0	0	0	0	0	0	0	0	0	0	0	0	0	0
RAGP1_HUMAN	Ran GTPase-activating protein 1 OS=Homo sapiens GN=RANGAP1 PE=1 SV=1	2.609	0.7154	0.045904	5	5	5	0	0	0	0	0	0	3	3	3	1	1	1	4	4	4	1	1	1	0	0	0	4	4	4	1	1	1	1	1	1	3	3	3	2	2	2	1	1	1	3	3	3
CSN5_HUMAN	COP9 signalosome complex subunit 5 OS=Homo sapiens GN=COPS5 PE=1 SV=4	1.878	0.6033	0.050753	1	1	1	1	1	1	1	1	1	0	0	0	1	1	1	1	1	1	0	0	0	0	0	0	0	0	0	0	0	0	0	0	0	0	0	0	1	1	1	0	0	0	0	0	0
NNMT_HUMAN	Nicotinamide N-methyltransferase OS=Homo sapiens GN=NNMT PE=1 SV=1	1.926	0.2556	0.343709	0	0	0	0	0	0	1	1	1	1	1	1	0	0	0	1	1	1	0	0	0	0	0	0	0	0	0	1	1	1	0	0	0	0	0	0	1	1	1	0	0	0	0	0	0
CALX_HUMAN	Calnexin OS=Homo sapiens GN=CANX PE=1 SV=2	3.997	0.77	0.001717	19	17	17	8	8	8	16	16	16	14	14	14	8	8	8	14	14	14	6	6	6	8	8	8	11	11	11	7	6	6	6	6	6	11	10	10	14	12	12	7	7	7	10	9	9
DNJC7_HUMAN	DnaJ homolog subfamily C member 7 OS=Homo sapiens GN=DNAJC7 PE=1 SV=2	3.124	0.6649	0.013648	5	5	5	1	1	1	4	4	4	6	6	6	2	2	2	4	4	4	2	2	2	1	1	1	4	4	4	1	1	1	0	0	0	2	2	2	5	5	5	2	2	2	3	3	3
NCPR_HUMAN	NADPH--cytochrome P450 reductase OS=Homo sapiens GN=POR PE=1 SV=2	1.86	0.5543	0.189851	1	1	1	0	0	0	1	1	1	0	0	0	0	0	0	0	0	0	0	0	0	0	0	0	0	0	0	0	0	0	0	0	0	0	0	0	0	0	0	0	0	0	0	0	0
1C16_HUMAN	HLA class I histocompatibility antigen, Cw-16 alpha chain OS=Homo sapiens GN=HLA-C PE=2 SV=1	2.621	0.7085	0.423033	1	1	0	0	0	0	1	1	0	0	0	0	0	0	0	0	0	0	0	0	0	0	0	0	0	0	0	0	0	0	0	0	0	0	0	0	0	0	0	0	0	0	0	0	0
KIFC1_HUMAN	Kinesin-like protein KIFC1 OS=Homo sapiens GN=KIFC1 PE=1 SV=2	1.903	0.6818	0.056716	2	2	2	2	2	2	3	3	3	1	1	1	1	1	1	1	1	1	0	0	0	0	0	0	0	0	0	0	0	0	0	0	0	0	0	0	1	1	1	0	0	0	0	0	0
P3H1_HUMAN	Prolyl 3-hydroxylase 1 OS=Homo sapiens GN=LEPRE1 PE=1 SV=2	2.489	0.5486	0.082573	0	0	0	0	0	0	0	0	0	1	1	1	0	0	0	1	1	1	0	0	0	0	0	0	0	0	0	0	0	0	0	0	0	1	1	1	0	0	0	0	0	0	0	0	0
GGCT_HUMAN	Gamma-glutamylcyclotransferase OS=Homo sapiens GN=GGCT PE=1 SV=1	2.735	0.6557	0.02905	3	3	3	1	1	1	1	1	1	2	2	2	3	3	3	2	2	2	1	1	1	1	1	1	2	2	2	2	2	2	2	2	2	3	3	3	2	2	2	2	2	2	2	2	2
AP1M2_HUMAN	AP-1 complex subunit mu-2 OS=Homo sapiens GN=AP1M2 PE=1 SV=4	1.238	0.5372	0.510464	0	0	0	0	0	0	0	0	0	0	0	0	0	0	0	0	0	0	0	0	0	0	0	0	0	0	0	0	0	0	0	0	0	0	0	0	0	0	0	0	0	0	0	0	0
LV204_HUMAN	Ig lambda chain V-II region TRO OS=Homo sapiens PE=1 SV=1	1.952	0.3827	0.135397	0	0	0	1	1	0	0	0	0	0	0	0	0	0	0	0	0	0	0	0	0	0	0	0	0	0	0	0	0	0	0	0	0	0	0	0	0	0	0	0	0	0	0	0	0
INCE_HUMAN	Inner centromere protein OS=Homo sapiens GN=INCENP PE=1 SV=3	1.776	0.6779	0.419214	0	0	0	0	0	0	0	0	0	0	0	0	0	0	0	1	1	1	0	0	0	1	1	1	0	0	0	0	0	0	0	0	0	0	0	0	0	0	0	0	0	0	0	0	0
AIMP1_HUMAN	Aminoacyl tRNA synthase complex-interacting multifunctional protein 1 OS=Homo sapiens GN=AIMP1 PE=1 SV=2	3.863	0.7499	0.019363	11	9	9	7	5	5	11	10	10	3	3	3	1	1	1	4	4	4	1	1	1	2	2	2	3	3	3	0	0	0	0	0	0	3	3	3	1	1	1	1	1	1	3	3	3
RLA0_HUMAN	60S acidic ribosomal protein P0 OS=Homo sapiens GN=RPLP0 PE=1 SV=1	5.048	0.7959	0.001682	13	9	3	9	9	3	9	9	4	10	8	3	9	7	2	10	8	3	6	4	1	8	6	2	11	8	3	9	8	3	5	5	2	9	7	2	9	7	3	5	4	1	10	8	3
CSTF2_HUMAN	Cleavage stimulation factor subunit 2 OS=Homo sapiens GN=CSTF2 PE=1 SV=1	1.834	0.6887	0.064362	2	2	1	1	1	0	0	0	0	1	1	1	0	0	0	1	1	0	0	0	0	0	0	0	2	2	1	0	0	0	0	0	0	0	0	0	1	1	1	0	0	0	0	0	0
RL14_HUMAN	60S ribosomal protein L14 OS=Homo sapiens GN=RPL14 PE=1 SV=4	2.67	0.5948	0.227042	3	3	3	2	2	2	2	2	2	1	1	1	1	1	1	3	3	3	0	0	0	1	1	1	2	2	2	1	1	1	0	0	0	1	1	1	2	2	2	0	0	0	0	0	0
TCEA1_HUMAN	Transcription elongation factor A protein 1 OS=Homo sapiens GN=TCEA1 PE=1 SV=2	2.187	0.6761	0.057937	0	0	0	0	0	0	0	0	0	1	1	1	1	1	1	1	1	1	1	1	1	1	1	1	1	1	1	1	1	1	0	0	0	1	1	1	1	1	1	1	1	1	1	1	1
H2A1B_HUMAN	Histone H2A type 1-B/E OS=Homo sapiens GN=HIST1H2AB PE=1 SV=2	2.554	0.4727	0.003833	4	3	0	5	3	0	3	2	0	10	4	0	11	4	0	8	4	0	15	2	0	11	3	0	11	4	0	6	2	0	1	1	0	12	4	0	8	3	0	4	1	0	6	1	0
PUS7_HUMAN	Pseudouridylate synthase 7 homolog OS=Homo sapiens GN=PUS7 PE=1 SV=2	1.36	0.186	0.162106	0	0	0	0	0	0	0	0	0	0	0	0	0	0	0	1	1	1	0	0	0	0	0	0	0	0	0	0	0	0	0	0	0	0	0	0	0	0	0	0	0	0	0	0	0
E2AK2_HUMAN	Interferon-induced, double-stranded RNA-activated protein kinase OS=Homo sapiens GN=EIF2AK2 PE=1 SV=2	1.387	0.4564	0.720745	0	0	0	0	0	0	0	0	0	0	0	0	0	0	0	0	0	0	0	0	0	0	0	0	0	0	0	0	0	0	0	0	0	0	0	0	0	0	0	0	0	0	0	0	0
OXSR1_HUMAN	Serine/threonine-protein kinase OSR1 OS=Homo sapiens GN=OXSR1 PE=1 SV=1	2.095	0.6468	0.143139	2	2	1	2	2	2	3	3	2	2	2	2	1	1	1	2	2	1	0	0	0	0	0	0	3	3	2	0	0	0	2	2	2	1	1	1	1	1	1	0	0	0	0	0	0
PLPL8_HUMAN	Calcium-independent phospholipase A2-gamma OS=Homo sapiens GN=PNPLA8 PE=1 SV=1	1.863	0.2899	3.27754	0	0	0	1	1	1	0	0	0	0	0	0	0	0	0	0	0	0	0	0	0	0	0	0	0	0	0	0	0	0	0	0	0	0	0	0	0	0	0	0	0	0	0	0	0
K2C8_HUMAN	Keratin, type II cytoskeletal 8 OS=Homo sapiens GN=KRT8 PE=1 SV=7	3.596	0.7728	0.000252	65	42	33	77	38	30	69	42	32	70	39	29	87	34	25	77	38	28	86	23	15	71	24	15	135	47	37	86	30	21	67	26	18	98	39	30	78	35	26	59	23	15	67	26	18
ENPL_HUMAN	Endoplasmin OS=Homo sapiens GN=HSP90B1 PE=1 SV=1	3.764	0.734	0.001846	29	26	20	15	14	10	30	25	18	29	26	18	24	19	12	36	28	21	13	12	8	19	15	9	29	23	17	23	18	10	14	12	7	22	17	10	26	21	14	22	15	11	24	19	11
PEF1_HUMAN	Peflin OS=Homo sapiens GN=PEF1 PE=1 SV=1	1.87	0.4934	0.045588	1	1	1	2	2	2	0	0	0	1	1	1	1	1	1	0	0	0	1	1	1	1	1	1	1	1	1	1	1	1	0	0	0	0	0	0	1	1	1	0	0	0	0	0	0
TBB1_HUMAN	Tubulin beta-1 chain OS=Homo sapiens GN=TUBB1 PE=1 SV=1	2.757	0.6576	0.005855	15	5	0	29	5	0	20	7	0	18	5	0	17	4	0	15	5	0	10	4	0	14	4	0	16	4	0	18	4	0	14	5	0	17	4	0	19	4	0	14	3	0	13	4	0
HEXI1_HUMAN	Protein HEXIM1 OS=Homo sapiens GN=HEXIM1 PE=1 SV=1	0.929	0.6006	0.486939	1	1	1	0	0	0	0	0	0	0	0	0	0	0	0	0	0	0	0	0	0	0	0	0	0	0	0	0	0	0	0	0	0	0	0	0	0	0	0	0	0	0	0	0	0
RS16_HUMAN	40S ribosomal protein S16 OS=Homo sapiens GN=RPS16 PE=1 SV=2	2.722	0.6372	0.018836	7	5	5	6	5	5	5	5	5	9	8	8	4	4	4	6	5	5	1	1	1	5	4	4	7	6	6	3	3	3	2	2	2	4	3	3	8	7	7	2	2	2	3	3	3
ARL3_HUMAN	ADP-ribosylation factor-like protein 3 OS=Homo sapiens GN=ARL3 PE=1 SV=2	1.628	0.2199	0.065171	0	0	0	0	0	0	0	0	0	0	0	0	0	0	0	0	0	0	0	0	0	0	0	0	0	0	0	0	0	0	0	0	0	0	0	0	1	1	1	0	0	0	0	0	0
RA1L2_HUMAN	Heterogeneous nuclear ribonucleoprotein A1-like 2 OS=Homo sapiens GN=HNRNPA1L2 PE=2 SV=2	3.723	0.7936	0.004483	13	6	0	7	4	0	13	7	0	10	6	0	7	4	0	10	5	0	5	3	0	8	3	0	8	6	0	12	4	0	6	4	0	5	3	0	14	6	0	6	3	0	9	4	0
DNJB1_HUMAN	DnaJ homolog subfamily B member 1 OS=Homo sapiens GN=DNAJB1 PE=1 SV=4	2.783	0.6493	0.124134	2	2	2	0	0	0	4	4	4	3	3	3	0	0	0	1	1	1	2	2	2	1	1	1	2	2	2	1	1	1	0	0	0	1	1	1	3	3	3	1	1	1	2	2	2
FKSG2_HUMAN	Putative apoptosis inhibitor FKSG2 OS=Homo sapiens GN=FKSG2 PE=5 SV=1	1.662	0.2145	0.086717	0	0	0	0	0	0	0	0	0	1	1	0	0	0	0	1	1	0	0	0	0	0	0	0	0	0	0	1	1	0	0	0	0	0	0	0	1	1	0	0	0	0	0	0	0
BRS3_HUMAN	Bombesin receptor subtype-3 OS=Homo sapiens GN=BRS3 PE=1 SV=1	1.19	0.2084	1.2477	0	0	0	0	0	0	1	1	1	0	0	0	0	0	0	0	0	0	0	0	0	0	0	0	0	0	0	0	0	0	0	0	0	0	0	0	0	0	0	0	0	0	0	0	0
CLPX_HUMAN	ATP-dependent Clp protease ATP-binding subunit clpX-like, mitochondrial OS=Homo sapiens GN=CLPX PE=1 SV=2	1.26	0.4254	2.10995	0	0	0	0	0	0	0	0	0	0	0	0	0	0	0	0	0	0	0	0	0	0	0	0	0	0	0	0	0	0	0	0	0	0	0	0	0	0	0	0	0	0	0	0	0
CNN3_HUMAN	Calponin-3 OS=Homo sapiens GN=CNN3 PE=1 SV=1	2.581	0.6573	0.068059	3	3	1	1	1	0	1	1	0	2	2	0	1	1	0	2	2	1	0	0	0	0	0	0	2	2	1	3	3	1	0	0	0	2	2	1	4	4	2	0	0	0	0	0	0
GRWD1_HUMAN	Glutamate-rich WD repeat-containing protein 1 OS=Homo sapiens GN=GRWD1 PE=1 SV=1	1.832	0.5759	1.11742	0	0	0	0	0	0	0	0	0	0	0	0	0	0	0	0	0	0	0	0	0	0	0	0	0	0	0	0	0	0	0	0	0	1	1	1	0	0	0	0	0	0	1	1	1
DKC1_HUMAN	H/ACA ribonucleoprotein complex subunit 4 OS=Homo sapiens GN=DKC1 PE=1 SV=3	1.585	0.3091	1.45532	0	0	0	0	0	0	0	0	0	1	1	1	0	0	0	0	0	0	0	0	0	0	0	0	0	0	0	0	0	0	0	0	0	0	0	0	0	0	0	0	0	0	0	0	0
YI016_HUMAN	Putative tubulin beta chain-like protein ENSP00000290377 OS=Homo sapiens PE=5 SV=2	3.788	0.717	0.005855	16	6	0	30	6	0	24	8	0	18	5	0	17	4	0	15	5	0	10	4	0	14	4	0	16	4	0	18	4	0	14	5	0	17	4	0	19	4	0	14	3	0	13	4	0
TBB8L_HUMAN	Tubulin beta-8 chain-like protein LOC260334 OS=Homo sapiens PE=1 SV=1	3.788	0.717	0.005855	16	6	0	30	6	0	24	8	0	18	5	0	17	4	0	15	5	0	10	4	0	14	4	0	16	4	0	18	4	0	14	5	0	17	4	0	19	4	0	14	3	0	13	4	0
HABP2_HUMAN	Hyaluronan-binding protein 2 OS=Homo sapiens GN=HABP2 PE=1 SV=1	1.304	0.3405	1.49752	0	0	0	0	0	0	0	0	0	1	1	1	0	0	0	1	1	1	0	0	0	0	0	0	0	0	0	0	0	0	0	0	0	0	0	0	0	0	0	0	0	0	0	0	0
RAP1B_HUMAN	Ras-related protein Rap-1b OS=Homo sapiens GN=RAP1B PE=1 SV=1	2.222	0.6836	0.027484	2	2	0	0	0	0	1	1	0	2	2	0	0	0	0	1	1	0	0	0	0	0	0	0	0	0	0	0	0	0	0	0	0	0	0	0	1	1	0	0	0	0	0	0	0
K2C6B_HUMAN	Keratin, type II cytoskeletal 6B OS=Homo sapiens GN=KRT6B PE=1 SV=5	4.081	0.7844	0.001668	32	21	1	41	14	0	32	19	0	57	29	1	79	19	1	60	28	2	154	27	1	65	22	2	48	20	0	80	26	2	73	21	1	67	22	1	58	20	1	57	15	0	39	15	0
NCF2_HUMAN	Neutrophil cytosol factor 2 OS=Homo sapiens GN=NCF2 PE=1 SV=2	1.241	0.3997	1.03012	0	0	0	0	0	0	0	0	0	0	0	0	0	0	0	0	0	0	0	0	0	1	1	1	0	0	0	0	0	0	0	0	0	0	0	0	0	0	0	0	0	0	1	1	1
SAFB1_HUMAN	Scaffold attachment factor B1 OS=Homo sapiens GN=SAFB PE=1 SV=4	2.511	0.6672	0.022449	2	2	0	2	2	1	2	2	1	2	2	1	4	4	4	5	5	3	1	1	0	2	2	1	6	6	4	5	5	4	0	0	0	3	3	2	2	2	0	0	0	0	1	1	1
TLN2_HUMAN	Talin-2 OS=Homo sapiens GN=TLN2 PE=1 SV=4	1.798	0.4659	0.270088	0	0	0	0	0	0	1	1	0	0	0	0	0	0	0	2	2	0	1	1	1	0	0	0	1	1	1	1	1	1	0	0	0	1	1	1	1	1	0	0	0	0	1	1	1
MPDZ_HUMAN	Multiple PDZ domain protein OS=Homo sapiens GN=MPDZ PE=1 SV=2	1.042	0.2418	0.218611	0	0	0	0	0	0	0	0	0	0	0	0	0	0	0	0	0	0	0	0	0	0	0	0	0	0	0	0	0	0	1	1	1	0	0	0	0	0	0	0	0	0	0	0	0
TRA2A_HUMAN	Transformer-2 protein homolog alpha OS=Homo sapiens GN=TRA2A PE=1 SV=1	1.934	0.6331	0.005499	0	0	0	1	1	0	1	1	0	2	2	1	2	2	1	4	4	3	1	1	0	1	1	1	1	1	1	2	2	1	0	0	0	3	3	2	0	0	0	1	1	0	1	1	0
TCPA_HUMAN	T-complex protein 1 subunit alpha OS=Homo sapiens GN=TCP1 PE=1 SV=1	3.25	0.7398	0.001686	12	10	10	6	6	6	9	9	9	10	9	9	1	1	1	9	8	8	1	1	1	1	1	1	5	5	5	3	3	3	3	3	3	4	4	4	8	7	7	1	1	1	2	2	2
STT3A_HUMAN	Dolichyl-diphosphooligosaccharide--protein glycosyltransferase subunit STT3A OS=Homo sapiens GN=STT3A PE=1 SV=2	2.606	0.7023	0.0649	1	1	1	0	0	0	1	1	1	1	1	1	1	1	1	1	1	1	1	1	1	0	0	0	1	1	1	0	0	0	0	0	0	0	0	0	0	0	0	0	0	0	0	0	0
DX39A_HUMAN	ATP-dependent RNA helicase DDX39A OS=Homo sapiens GN=DDX39A PE=1 SV=2	2.468	0.6508	0.004149	6	6	0	3	3	0	5	5	0	4	4	0	1	1	0	6	5	0	0	0	0	2	2	0	7	6	0	2	2	0	0	0	0	3	3	0	2	2	0	1	1	0	2	2	0
ZA2G_HUMAN	Zinc-alpha-2-glycoprotein OS=Homo sapiens GN=AZGP1 PE=1 SV=2	2.572	0.6248	0.053979	0	0	0	0	0	0	0	0	0	1	1	0	1	1	0	0	0	0	0	0	0	0	0	0	0	0	0	0	0	0	1	1	0	0	0	0	0	0	0	0	0	0	0	0	0
GRB2_HUMAN	Growth factor receptor-bound protein 2 OS=Homo sapiens GN=GRB2 PE=1 SV=1	2.082	0.6719	0.012421	3	3	3	0	0	0	1	1	1	2	2	2	0	0	0	0	0	0	0	0	0	2	2	2	1	1	1	2	2	2	0	0	0	1	1	1	2	2	2	1	1	1	1	1	1
RS20_HUMAN	40S ribosomal protein S20 OS=Homo sapiens GN=RPS20 PE=1 SV=1	3.683	0.6325	0.017937	5	3	3	1	1	1	1	1	1	3	2	2	1	1	1	3	2	2	0	0	0	2	1	1	3	2	2	1	1	1	1	1	1	2	2	2	3	1	1	1	1	1	1	1	1
CD97_HUMAN	CD97 antigen OS=Homo sapiens GN=CD97 PE=1 SV=4	2.377	0.6883	0.037154	1	1	1	0	0	0	2	2	1	1	1	1	0	0	0	1	1	1	0	0	0	0	0	0	1	1	0	0	0	0	0	0	0	1	1	0	0	0	0	0	0	0	1	1	0
NHP2_HUMAN	H/ACA ribonucleoprotein complex subunit 2 OS=Homo sapiens GN=NHP2 PE=1 SV=1	2.325	0.6025	0.244122	0	0	0	1	1	1	0	0	0	1	1	1	1	1	1	0	0	0	0	0	0	0	0	0	0	0	0	0	0	0	0	0	0	0	0	0	1	1	1	0	0	0	0	0	0
BUB1B_HUMAN	Mitotic checkpoint serine/threonine-protein kinase BUB1 beta OS=Homo sapiens GN=BUB1B PE=1 SV=3	1.198	0.3814	0.258159	2	2	2	0	0	0	0	0	0	0	0	0	0	0	0	0	0	0	0	0	0	0	0	0	0	0	0	0	0	0	0	0	0	0	0	0	0	0	0	0	0	0	0	0	0
CU086_HUMAN	Putative uncharacterized protein encoded by LINC00205 OS=Homo sapiens GN=LINC00205 PE=5 SV=1	1.151	0.2328	3.17841	0	0	0	0	0	0	0	0	0	0	0	0	0	0	0	0	0	0	0	0	0	0	0	0	0	0	0	0	0	0	0	0	0	0	0	0	0	0	0	0	0	0	0	0	0
SNX5_HUMAN	Sorting nexin-5 OS=Homo sapiens GN=SNX5 PE=1 SV=1	2.202	0.5034	0.012319	2	2	1	0	0	0	0	0	0	1	1	0	1	1	0	0	0	0	1	1	0	0	0	0	0	0	0	1	1	0	0	0	0	0	0	0	1	1	0	1	1	0	1	1	0
DOB_HUMAN	HLA class II histocompatibility antigen, DO beta chain OS=Homo sapiens GN=HLA-DOB PE=1 SV=1	1.057	0.2857	1.94394	0	0	0	0	0	0	1	1	1	0	0	0	0	0	0	0	0	0	0	0	0	0	0	0	0	0	0	0	0	0	0	0	0	0	0	0	0	0	0	0	0	0	0	0	0
RBGPR_HUMAN	Rab3 GTPase-activating protein non-catalytic subunit OS=Homo sapiens GN=RAB3GAP2 PE=1 SV=1	1.302	0.4969	0.381319	0	0	0	0	0	0	0	0	0	0	0	0	0	0	0	1	1	1	0	0	0	0	0	0	0	0	0	0	0	0	0	0	0	0	0	0	0	0	0	0	0	0	0	0	0
SMAP1_HUMAN	Stromal membrane-associated protein 1 OS=Homo sapiens GN=SMAP1 PE=1 SV=2	1.971	0.4769	0.871645	0	0	0	0	0	0	1	1	1	0	0	0	0	0	0	0	0	0	0	0	0	0	0	0	0	0	0	0	0	0	0	0	0	0	0	0	0	0	0	0	0	0	0	0	0
HNRPU_HUMAN	Heterogeneous nuclear ribonucleoprotein U OS=Homo sapiens GN=HNRNPU PE=1 SV=6	5.354	0.7878	0.000497	24	18	18	20	16	16	30	23	23	36	25	25	26	17	17	29	20	20	11	9	9	18	15	15	28	23	23	30	20	20	16	16	16	29	19	19	21	17	17	5	5	5	16	12	12
KLC4_HUMAN	Kinesin light chain 4 OS=Homo sapiens GN=KLC4 PE=1 SV=3	1.14	0.2167	0.785391	0	0	0	0	0	0	0	0	0	0	0	0	0	0	0	0	0	0	0	0	0	0	0	0	1	1	0	0	0	0	0	0	0	0	0	0	0	0	0	0	0	0	0	0	0
NUP62_HUMAN	Nuclear pore glycoprotein p62 OS=Homo sapiens GN=NUP62 PE=1 SV=3	3.287	0.7195	0.100021	1	1	1	0	0	0	0	0	0	0	0	0	0	0	0	0	0	0	0	0	0	0	0	0	0	0	0	0	0	0	0	0	0	0	0	0	0	0	0	0	0	0	0	0	0
MYH6_HUMAN	Myosin-6 OS=Homo sapiens GN=MYH6 PE=1 SV=5	1.991	0.3014	0.224977	0	0	0	0	0	0	0	0	0	0	0	0	0	0	0	0	0	0	1	1	0	0	0	0	0	0	0	0	0	0	0	0	0	0	0	0	0	0	0	0	0	0	0	0	0
MYOF_HUMAN	Myoferlin OS=Homo sapiens GN=MYOF PE=1 SV=1	2.598	0.6818	0.020744	6	6	6	1	1	1	6	6	5	12	12	11	1	1	1	9	9	9	0	0	0	0	0	0	4	4	4	2	2	1	0	0	0	1	1	1	3	3	3	0	0	0	0	0	0
SEPT7_HUMAN	Septin-7 OS=Homo sapiens GN=SEPT7 PE=1 SV=2	2.203	0.6868	0.0381	5	4	3	1	1	1	4	3	2	5	5	4	1	1	1	4	4	3	2	2	2	2	2	2	2	2	2	3	3	3	1	1	1	4	4	4	4	4	4	2	2	2	2	2	2
U5S1_HUMAN	116 kDa U5 small nuclear ribonucleoprotein component OS=Homo sapiens GN=EFTUD2 PE=1 SV=1	2.754	0.6144	0.005549	7	7	6	6	6	5	11	11	10	7	7	6	4	4	3	11	11	10	1	1	0	3	3	2	7	7	7	4	3	2	2	2	1	6	6	5	6	6	5	1	1	0	5	5	4
SQSTM_HUMAN	Sequestosome-1 OS=Homo sapiens GN=SQSTM1 PE=1 SV=1	2.432	0.7644	0.026029	1	1	1	1	1	1	2	2	2	0	0	0	0	0	0	1	1	1	0	0	0	0	0	0	0	0	0	0	0	0	0	0	0	0	0	0	0	0	0	0	0	0	0	0	0
H15_HUMAN	Histone H1.5 OS=Homo sapiens GN=HIST1H1B PE=1 SV=3	2.372	0.6231	0.093269	1	1	0	1	1	0	1	1	0	0	0	0	2	2	1	1	1	1	1	1	0	1	1	0	3	3	1	1	1	0	1	1	0	3	3	1	1	1	0	1	1	0	1	1	0
NSF1C_HUMAN	NSFL1 cofactor p47 OS=Homo sapiens GN=NSFL1C PE=1 SV=2	1.574	0.6283	0.331392	3	3	3	0	0	0	1	1	1	1	1	1	0	0	0	0	0	0	0	0	0	0	0	0	1	1	1	0	0	0	1	1	1	1	1	1	0	0	0	0	0	0	0	0	0
NUDC1_HUMAN	NudC domain-containing protein 1 OS=Homo sapiens GN=NUDCD1 PE=1 SV=2	1.286	0.2309	1.03421	1	1	1	0	0	0	0	0	0	1	1	1	0	0	0	0	0	0	0	0	0	0	0	0	0	0	0	1	1	1	0	0	0	0	0	0	0	0	0	0	0	0	0	0	0
MAST4_HUMAN	Microtubule-associated serine/threonine-protein kinase 4 OS=Homo sapiens GN=MAST4 PE=1 SV=3	1.922	0.4043	0.237803	1	1	0	0	0	0	0	0	0	0	0	0	0	0	0	0	0	0	0	0	0	0	0	0	0	0	0	0	0	0	0	0	0	0	0	0	1	1	0	0	0	0	0	0	0
PTPRF_HUMAN	Receptor-type tyrosine-protein phosphatase F OS=Homo sapiens GN=PTPRF PE=1 SV=2	1.933	0.6813	0.814328	0	0	0	0	0	0	1	1	1	0	0	0	0	0	0	0	0	0	0	0	0	0	0	0	0	0	0	0	0	0	0	0	0	0	0	0	0	0	0	0	0	0	0	0	0
TM9S2_HUMAN	Transmembrane 9 superfamily member 2 OS=Homo sapiens GN=TM9SF2 PE=1 SV=1	1.488	0.2802	1.96783	0	0	0	0	0	0	0	0	0	0	0	0	0	0	0	0	0	0	0	0	0	0	0	0	0	0	0	0	0	0	0	0	0	0	0	0	0	0	0	0	0	0	1	1	0
SBSN_HUMAN	Suprabasin OS=Homo sapiens GN=SBSN PE=2 SV=2	4.875	0.7389	0.036513	0	0	0	0	0	0	0	0	0	0	0	0	0	0	0	0	0	0	0	0	0	0	0	0	0	0	0	0	0	0	0	0	0	0	0	0	0	0	0	0	0	0	0	0	0
SYCC_HUMAN	Cysteine--tRNA ligase, cytoplasmic OS=Homo sapiens GN=CARS PE=1 SV=3	2.245	0.6936	0.071622	2	2	2	2	2	2	1	1	1	3	3	3	1	1	1	3	3	3	1	1	1	1	1	1	3	3	3	2	2	2	1	1	1	2	2	2	1	1	1	1	1	1	1	1	1
NAA50_HUMAN	N-alpha-acetyltransferase 50 OS=Homo sapiens GN=NAA50 PE=1 SV=1	1.878	0.5745	0.058972	1	1	1	0	0	0	0	0	0	1	1	1	0	0	0	0	0	0	0	0	0	0	0	0	0	0	0	1	1	1	0	0	0	0	0	0	1	1	1	0	0	0	0	0	0
EMC1_HUMAN	ER membrane protein complex subunit 1 OS=Homo sapiens GN=EMC1 PE=1 SV=1	2.292	0.263	0.737283	0	0	0	0	0	0	0	0	0	0	0	0	0	0	0	0	0	0	0	0	0	0	0	0	0	0	0	0	0	0	1	1	1	0	0	0	0	0	0	0	0	0	0	0	0
PYRG1_HUMAN	CTP synthase 1 OS=Homo sapiens GN=CTPS1 PE=1 SV=2	3.091	0.6956	0.003318	15	14	12	5	5	5	13	13	13	15	13	11	13	12	10	14	12	11	7	7	6	9	9	8	13	12	11	12	11	10	10	10	8	12	12	11	14	11	9	6	6	5	10	10	9
RAVR1_HUMAN	Ribonucleoprotein PTB-binding 1 OS=Homo sapiens GN=RAVER1 PE=1 SV=1	2.409	0.6327	0.135245	0	0	0	1	1	1	1	1	1	1	1	1	0	0	0	1	1	1	0	0	0	1	1	1	1	1	1	0	0	0	0	0	0	1	1	1	1	1	1	0	0	0	0	0	0
PSIP1_HUMAN	PC4 and SFRS1-interacting protein OS=Homo sapiens GN=PSIP1 PE=1 SV=1	1.943	0.5764	0.005613	0	0	0	0	0	0	0	0	0	1	1	1	0	0	0	0	0	0	0	0	0	0	0	0	1	1	1	0	0	0	0	0	0	0	0	0	0	0	0	0	0	0	0	0	0
RHG01_HUMAN	Rho GTPase-activating protein 1 OS=Homo sapiens GN=ARHGAP1 PE=1 SV=1	2.953	0.6567	0.072377	4	4	4	0	0	0	2	2	2	1	1	1	0	0	0	2	2	2	0	0	0	0	0	0	0	0	0	0	0	0	0	0	0	0	0	0	1	1	1	0	0	0	0	0	0
NQO1_HUMAN	NAD(P)H dehydrogenase [quinone] 1 OS=Homo sapiens GN=NQO1 PE=1 SV=1	2.777	0.6748	0.033777	8	7	7	2	2	2	4	3	3	5	3	3	2	2	2	4	3	3	1	1	1	2	2	2	4	3	3	3	2	2	1	1	1	3	2	2	5	4	4	0	0	0	1	1	1
PIN4_HUMAN	Peptidyl-prolyl cis-trans isomerase NIMA-interacting 4 OS=Homo sapiens GN=PIN4 PE=1 SV=1	2.385	0.6864	0.172336	0	0	0	0	0	0	0	0	0	1	1	1	0	0	0	1	1	1	0	0	0	0	0	0	0	0	0	1	1	1	0	0	0	0	0	0	1	1	1	0	0	0	0	0	0
AT5G3_HUMAN	ATP synthase lipid-binding protein, mitochondrial OS=Homo sapiens GN=ATP5G3 PE=1 SV=1	1.409	0.2789	0.695935	0	0	0	0	0	0	0	0	0	0	0	0	0	0	0	0	0	0	0	0	0	0	0	0	0	0	0	0	0	0	0	0	0	0	0	0	1	1	0	0	0	0	0	0	0
ALDOA_HUMAN	Fructose-bisphosphate aldolase A OS=Homo sapiens GN=ALDOA PE=1 SV=2	3.29	0.7256	0.000364	17	12	10	13	10	8	21	17	14	21	13	10	21	13	10	28	14	11	17	11	8	16	10	8	19	12	10	21	13	10	16	11	9	20	12	9	23	13	10	19	12	9	18	11	9
RS21_HUMAN	40S ribosomal protein S21 OS=Homo sapiens GN=RPS21 PE=1 SV=1	2.499	0.6716	0.003847	2	2	2	1	1	1	1	1	1	0	0	0	0	0	0	1	1	1	1	1	1	1	1	1	1	1	1	1	1	1	1	1	1	0	0	0	1	1	1	1	1	1	1	1	1
UBP10_HUMAN	Ubiquitin carboxyl-terminal hydrolase 10 OS=Homo sapiens GN=USP10 PE=1 SV=2	1.168	0.4885	0.875981	1	1	1	0	0	0	1	1	1	0	0	0	0	0	0	0	0	0	0	0	0	0	0	0	0	0	0	0	0	0	0	0	0	0	0	0	0	0	0	0	0	0	0	0	0
HNRPF_HUMAN	Heterogeneous nuclear ribonucleoprotein F OS=Homo sapiens GN=HNRNPF PE=1 SV=3	3.557	0.7153	0.003281	8	6	5	8	6	5	7	5	3	10	7	6	3	3	3	7	6	5	4	3	3	2	2	2	7	6	5	6	4	4	3	3	3	7	6	5	6	4	3	1	1	1	3	3	3
UB2D2_HUMAN	Ubiquitin-conjugating enzyme E2 D2 OS=Homo sapiens GN=UBE2D2 PE=1 SV=1	2.122	0.567	0.111378	1	1	0	0	0	0	1	1	1	1	1	0	0	0	0	1	1	0	0	0	0	0	0	0	0	0	0	0	0	0	0	0	0	0	0	0	0	0	0	0	0	0	0	0	0
ENDOU_HUMAN	Poly(U)-specific endoribonuclease OS=Homo sapiens GN=ENDOU PE=1 SV=2	1.131	0.1317	0.85239	0	0	0	0	0	0	0	0	0	0	0	0	0	0	0	0	0	0	0	0	0	0	0	0	0	0	0	0	0	0	0	0	0	0	0	0	0	0	0	0	0	0	0	0	0
HAKAI_HUMAN	E3 ubiquitin-protein ligase Hakai OS=Homo sapiens GN=CBLL1 PE=1 SV=1	1.683	0.3936	0.174769	1	1	0	1	1	0	1	1	0	1	1	0	1	1	0	1	1	0	1	1	0	1	1	0	1	1	0	1	1	0	1	1	0	1	1	0	1	1	0	0	0	0	1	1	0
A16L2_HUMAN	Autophagy-related protein 16-2 OS=Homo sapiens GN=ATG16L2 PE=2 SV=2	1.506	0.172	0.717627	0	0	0	0	0	0	0	0	0	0	0	0	0	0	0	0	0	0	0	0	0	0	0	0	0	0	0	1	1	1	0	0	0	0	0	0	0	0	0	0	0	0	0	0	0
BLM_HUMAN	Bloom syndrome protein OS=Homo sapiens GN=BLM PE=1 SV=1	1.911	0.4771	0.177008	1	1	1	0	0	0	0	0	0	1	1	1	1	1	1	1	1	1	0	0	0	1	1	1	1	1	1	0	0	0	0	0	0	1	1	1	1	1	1	0	0	0	1	1	1
IKZF3_HUMAN	Zinc finger protein Aiolos OS=Homo sapiens GN=IKZF3 PE=1 SV=2	1.132	0.334	2.42156	1	1	1	1	1	1	1	1	1	0	0	0	0	0	0	0	0	0	2	1	1	0	0	0	0	0	0	1	1	1	0	0	0	1	1	1	1	1	1	0	0	0	0	0	0
PSD12_HUMAN	26S proteasome non-ATPase regulatory subunit 12 OS=Homo sapiens GN=PSMD12 PE=1 SV=3	2.458	0.7431	0.046353	8	8	8	2	2	2	4	4	4	2	2	2	1	1	1	2	2	2	1	1	1	1	1	1	1	1	1	0	0	0	0	0	0	0	0	0	2	2	2	1	1	1	1	1	1
2A5G_HUMAN	Serine/threonine-protein phosphatase 2A 56 kDa regulatory subunit gamma isoform OS=Homo sapiens GN=PPP2R5C PE=1 SV=3	1.617	0.4904	0.256771	0	0	0	0	0	0	0	0	0	0	0	0	0	0	0	0	0	0	1	1	1	0	0	0	1	1	1	0	0	0	0	0	0	0	0	0	0	0	0	0	0	0	0	0	0
TGM4_HUMAN	Protein-glutamine gamma-glutamyltransferase 4 OS=Homo sapiens GN=TGM4 PE=1 SV=2	1.442	0.2205	0.858495	0	0	0	0	0	0	0	0	0	0	0	0	0	0	0	0	0	0	0	0	0	0	0	0	0	0	0	0	0	0	0	0	0	0	0	0	0	0	0	0	0	0	0	0	0
RTN1_HUMAN	Reticulon-1 OS=Homo sapiens GN=RTN1 PE=1 SV=1	1.543	0.314	0.794687	0	0	0	0	0	0	0	0	0	1	1	1	1	1	1	0	0	0	0	0	0	0	0	0	1	1	1	1	1	1	0	0	0	0	0	0	1	1	1	0	0	0	0	0	0
UBQL4_HUMAN	Ubiquilin-4 OS=Homo sapiens GN=UBQLN4 PE=1 SV=2	1.192	0.3951	0.071877	0	0	0	0	0	0	0	0	0	1	1	0	0	0	0	0	0	0	0	0	0	0	0	0	0	0	0	0	0	0	0	0	0	0	0	0	0	0	0	0	0	0	0	0	0
LG3BP_HUMAN	Galectin-3-binding protein OS=Homo sapiens GN=LGALS3BP PE=1 SV=1	2.046	0.6119	0.102518	2	2	2	0	0	0	1	1	1	0	0	0	1	1	1	0	0	0	0	0	0	1	1	1	1	1	1	0	0	0	1	1	1	0	0	0	1	1	1	1	1	1	0	0	0
PPT1_HUMAN	Palmitoyl-protein thioesterase 1 OS=Homo sapiens GN=PPT1 PE=1 SV=1	1.788	0.6493	0.354384	2	2	2	0	0	0	1	1	1	0	0	0	0	0	0	0	0	0	0	0	0	0	0	0	0	0	0	0	0	0	0	0	0	0	0	0	0	0	0	0	0	0	0	0	0
DHX15_HUMAN	Putative pre-mRNA-splicing factor ATP-dependent RNA helicase DHX15 OS=Homo sapiens GN=DHX15 PE=1 SV=2	3.346	0.7382	0.000519	20	19	19	8	8	8	15	13	13	12	10	10	7	5	5	12	11	11	4	4	4	7	5	5	12	10	10	9	7	7	6	5	5	10	8	8	11	9	9	3	3	3	7	6	6
U520_HUMAN	U5 small nuclear ribonucleoprotein 200 kDa helicase OS=Homo sapiens GN=SNRNP200 PE=1 SV=2	2.906	0.693	0.004481	18	17	17	10	10	10	17	17	17	17	17	17	7	7	7	21	21	21	2	2	2	9	9	9	19	19	19	8	8	8	1	1	1	11	11	11	11	11	11	2	2	2	9	9	9
STRP1_HUMAN	Striatin-interacting protein 1 OS=Homo sapiens GN=STRIP1 PE=1 SV=1	1.027	0.2833	0.003767	0	0	0	0	0	0	0	0	0	0	0	0	0	0	0	0	0	0	0	0	0	0	0	0	0	0	0	0	0	0	0	0	0	0	0	0	0	0	0	1	1	1	0	0	0
MYH14_HUMAN	Myosin-14 OS=Homo sapiens GN=MYH14 PE=1 SV=2	2.913	0.599	0.012466	5	4	1	2	2	1	5	5	1	3	3	0	2	2	0	3	3	0	1	1	0	2	2	0	3	3	1	2	2	0	1	1	0	2	2	0	2	2	0	1	1	0	2	2	0
NEP1_HUMAN	Ribosomal RNA small subunit methyltransferase NEP1 OS=Homo sapiens GN=EMG1 PE=1 SV=4	1.884	0.5337	0.799788	0	0	0	0	0	0	0	0	0	1	1	1	0	0	0	0	0	0	0	0	0	0	0	0	1	1	1	0	0	0	0	0	0	0	0	0	0	0	0	0	0	0	0	0	0
PDE3A_HUMAN	cGMP-inhibited 3',5'-cyclic phosphodiesterase A OS=Homo sapiens GN=PDE3A PE=1 SV=3	1.498	0.5841	0.052501	0	0	0	0	0	0	1	1	1	0	0	0	0	0	0	1	1	1	0	0	0	0	0	0	1	1	1	0	0	0	0	0	0	0	0	0	1	1	1	0	0	0	0	0	0
IF5AL_HUMAN	Eukaryotic translation initiation factor 5A-1-like OS=Homo sapiens GN=EIF5AL1 PE=1 SV=2	2.52	0.644	0.252738	3	2	0	0	0	0	3	3	0	2	2	0	1	1	0	4	2	0	1	1	0	3	2	0	2	2	0	3	2	0	2	2	0	3	2	0	3	2	0	2	1	0	4	2	0
EFHD2_HUMAN	EF-hand domain-containing protein D2 OS=Homo sapiens GN=EFHD2 PE=1 SV=1	2.605	0.6337	0.17552	0	0	0	0	0	0	0	0	0	1	1	1	0	0	0	0	0	0	0	0	0	0	0	0	0	0	0	0	0	0	0	0	0	0	0	0	2	2	2	0	0	0	0	0	0
PSMD6_HUMAN	26S proteasome non-ATPase regulatory subunit 6 OS=Homo sapiens GN=PSMD6 PE=1 SV=1	3.424	0.5563	0.00391	9	8	8	1	1	1	0	0	0	0	0	0	1	1	1	0	0	0	0	0	0	0	0	0	0	0	0	0	0	0	0	0	0	0	0	0	2	2	2	0	0	0	1	1	1
SYVC_HUMAN	Valine--tRNA ligase OS=Homo sapiens GN=VARS PE=1 SV=4	2.982	0.7295	0.005871	5	5	5	3	3	3	3	3	3	3	3	3	2	2	2	5	5	5	0	0	0	2	2	2	2	2	2	1	1	1	2	2	2	1	1	1	2	2	2	0	0	0	1	1	1
RCC2_HUMAN	Protein RCC2 OS=Homo sapiens GN=RCC2 PE=1 SV=2	3.579	0.7905	0.016475	8	7	7	7	5	5	12	10	10	10	7	7	5	4	4	11	9	9	4	4	4	7	6	6	8	7	7	8	7	7	5	5	5	11	10	10	10	9	9	2	2	2	5	4	4
UB2D3_HUMAN	Ubiquitin-conjugating enzyme E2 D3 OS=Homo sapiens GN=UBE2D3 PE=1 SV=1	2.122	0.567	0.111378	1	1	0	0	0	0	0	0	0	2	2	1	0	0	0	1	1	0	0	0	0	0	0	0	0	0	0	0	0	0	0	0	0	0	0	0	0	0	0	0	0	0	0	0	0
USO1_HUMAN	General vesicular transport factor p115 OS=Homo sapiens GN=USO1 PE=1 SV=2	2.428	0.6872	0.148046	5	5	5	1	1	1	1	1	1	1	1	1	0	0	0	2	2	2	0	0	0	0	0	0	1	1	1	0	0	0	0	0	0	1	1	1	2	2	2	0	0	0	0	0	0
STIP1_HUMAN	Stress-induced-phosphoprotein 1 OS=Homo sapiens GN=STIP1 PE=1 SV=1	3.233	0.7258	0.006649	29	28	28	11	11	11	28	27	27	24	22	22	22	22	22	25	22	22	11	11	11	14	14	14	20	19	19	16	16	16	14	14	14	17	17	17	26	23	23	14	14	14	19	19	19
ARL1_HUMAN	ADP-ribosylation factor-like protein 1 OS=Homo sapiens GN=ARL1 PE=1 SV=1	1.513	0.197	0.633287	1	1	0	0	0	0	0	0	0	0	0	0	0	0	0	0	0	0	0	0	0	0	0	0	0	0	0	0	0	0	0	0	0	0	0	0	0	0	0	0	0	0	0	0	0
NP1L1_HUMAN	Nucleosome assembly protein 1-like 1 OS=Homo sapiens GN=NAP1L1 PE=1 SV=1	2.863	0.7027	0.010776	4	4	3	2	2	1	5	4	3	2	2	1	1	1	0	4	4	3	0	0	0	0	0	0	5	4	3	1	1	1	1	1	1	3	3	2	3	3	2	1	1	1	0	0	0
MD2L1_HUMAN	Mitotic spindle assembly checkpoint protein MAD2A OS=Homo sapiens GN=MAD2L1 PE=1 SV=1	1.263	0.228	0.190883	0	0	0	0	0	0	0	0	0	1	1	1	0	0	0	0	0	0	0	0	0	0	0	0	0	0	0	0	0	0	0	0	0	0	0	0	1	1	1	0	0	0	0	0	0
PSB6_HUMAN	Proteasome subunit beta type-6 OS=Homo sapiens GN=PSMB6 PE=1 SV=4	2.688	0.5967	0.00611	5	5	5	4	4	4	5	5	5	5	5	5	4	4	4	5	5	5	3	3	3	4	4	4	5	5	5	5	5	5	4	4	4	5	5	5	5	5	5	5	5	5	5	5	5
TIA1_HUMAN	Nucleolysin TIA-1 isoform p40 OS=Homo sapiens GN=TIA1 PE=1 SV=3	2.158	0.6066	0.026768	0	0	0	0	0	0	0	0	0	0	0	0	0	0	0	0	0	0	0	0	0	0	0	0	1	1	0	0	0	0	0	0	0	0	0	0	0	0	0	0	0	0	0	0	0
TCPE_HUMAN	T-complex protein 1 subunit epsilon OS=Homo sapiens GN=CCT5 PE=1 SV=1	2.843	0.6874	0.006054	18	18	18	5	5	5	12	11	11	10	9	9	7	7	7	9	9	9	3	3	3	7	7	7	8	8	8	8	6	6	5	5	5	7	7	7	13	11	11	7	7	7	7	7	7
OGDHL_HUMAN	2-oxoglutarate dehydrogenase-like, mitochondrial OS=Homo sapiens GN=OGDHL PE=1 SV=3	2.125	0.6165	0.117748	1	1	0	0	0	0	1	1	0	2	2	0	0	0	0	1	1	0	0	0	0	1	1	0	0	0	0	0	0	0	0	0	0	0	0	0	0	0	0	0	0	0	0	0	0
XRCC4_HUMAN	DNA repair protein XRCC4 OS=Homo sapiens GN=XRCC4 PE=1 SV=2	2.581	0.716	0.002718	0	0	0	0	0	0	0	0	0	6	6	6	2	2	2	3	3	3	3	3	3	3	3	3	7	7	7	4	4	4	4	4	4	5	4	4	6	6	6	2	2	2	6	6	6
TGM2_HUMAN	Protein-glutamine gamma-glutamyltransferase 2 OS=Homo sapiens GN=TGM2 PE=1 SV=2	1.911	0.6119	0.044276	3	3	3	0	0	0	1	1	1	0	0	0	0	0	0	1	1	1	0	0	0	1	1	1	2	2	2	0	0	0	1	1	1	1	1	1	1	1	1	0	0	0	0	0	0
RLA0L_HUMAN	60S acidic ribosomal protein P0-like OS=Homo sapiens GN=RPLP0P6 PE=5 SV=1	3.313	0.7959	0.001682	8	6	0	6	6	0	5	5	0	7	5	0	6	5	0	7	5	0	4	3	0	6	4	0	8	5	0	6	5	0	3	3	0	7	5	0	6	4	0	4	3	0	7	5	0
PLK4_HUMAN	Serine/threonine-protein kinase PLK4 OS=Homo sapiens GN=PLK4 PE=1 SV=3	1.616	0.3423	0.008576	0	0	0	0	0	0	0	0	0	1	1	1	1	1	1	2	1	1	0	0	0	1	1	1	3	1	1	1	1	1	1	1	1	2	1	1	1	1	1	1	1	1	1	1	1
NAC2_HUMAN	Sodium/calcium exchanger 2 OS=Homo sapiens GN=SLC8A2 PE=2 SV=2	1.305	0.2614	0.7887	0	0	0	0	0	0	0	0	0	1	1	1	0	0	0	1	1	1	0	0	0	0	0	0	0	0	0	0	0	0	0	0	0	1	1	1	0	0	0	0	0	0	0	0	0
ZFY19_HUMAN	Zinc finger FYVE domain-containing protein 19 OS=Homo sapiens GN=ZFYVE19 PE=1 SV=3	1.834	0.3871	0.561994	0	0	0	0	0	0	0	0	0	0	0	0	0	0	0	1	1	0	0	0	0	0	0	0	1	1	0	0	0	0	0	0	0	0	0	0	0	0	0	0	0	0	0	0	0
2A5A_HUMAN	Serine/threonine-protein phosphatase 2A 56 kDa regulatory subunit alpha isoform OS=Homo sapiens GN=PPP2R5A PE=1 SV=1	1.362	0.2166	1.14476	0	0	0	0	0	0	0	0	0	0	0	0	0	0	0	0	0	0	0	0	0	0	0	0	0	0	0	0	0	0	0	0	0	0	0	0	0	0	0	0	0	0	1	1	0
NTF2_HUMAN	Nuclear transport factor 2 OS=Homo sapiens GN=NUTF2 PE=1 SV=1	1.769	0.3081	0.647748	0	0	0	0	0	0	0	0	0	0	0	0	0	0	0	0	0	0	0	0	0	0	0	0	0	0	0	0	0	0	0	0	0	0	0	0	0	0	0	0	0	0	0	0	0
CTBP2_HUMAN	C-terminal-binding protein 2 OS=Homo sapiens GN=CTBP2 PE=1 SV=1	2.111	0.3695	0.200338	1	1	0	0	0	0	0	0	0	2	2	2	0	0	0	0	0	0	0	0	0	0	0	0	0	0	0	0	0	0	0	0	0	0	0	0	0	0	0	0	0	0	1	1	1
SMC3_HUMAN	Structural maintenance of chromosomes protein 3 OS=Homo sapiens GN=SMC3 PE=1 SV=2	2.49	0.6686	0.004912	12	12	12	1	1	1	10	10	10	11	11	11	3	3	3	11	11	11	2	2	2	7	7	7	12	12	12	4	4	4	1	1	1	4	4	4	3	3	3	3	3	3	6	6	6
AMPH_HUMAN	Amphiphysin OS=Homo sapiens GN=AMPH PE=1 SV=1	1.15	0.2209	0.423439	0	0	0	0	0	0	0	0	0	0	0	0	0	0	0	0	0	0	0	0	0	0	0	0	0	0	0	0	0	0	0	0	0	0	0	0	1	1	0	0	0	0	0	0	0
NUDC2_HUMAN	NudC domain-containing protein 2 OS=Homo sapiens GN=NUDCD2 PE=1 SV=1	1.378	0.2823	0.486181	1	1	1	0	0	0	0	0	0	0	0	0	0	0	0	0	0	0	0	0	0	0	0	0	0	0	0	0	0	0	0	0	0	0	0	0	0	0	0	0	0	0	0	0	0
AT5G2_HUMAN	ATP synthase lipid-binding protein, mitochondrial OS=Homo sapiens GN=ATP5G2 PE=2 SV=1	1.409	0.2789	0.695935	0	0	0	0	0	0	0	0	0	0	0	0	0	0	0	0	0	0	0	0	0	0	0	0	0	0	0	0	0	0	0	0	0	0	0	0	1	1	0	0	0	0	0	0	0
CDC73_HUMAN	Parafibromin OS=Homo sapiens GN=CDC73 PE=1 SV=1	2.261	0.5383	0.198982	1	1	1	0	0	0	3	3	3	2	2	2	0	0	0	1	1	1	1	1	1	0	0	0	2	2	2	0	0	0	0	0	0	1	1	1	1	1	1	0	0	0	0	0	0
RUXGL_HUMAN	Small nuclear ribonucleoprotein G-like protein OS=Homo sapiens PE=3 SV=2	1.373	0.4338	0.473036	1	1	0	0	0	0	0	0	0	1	1	0	0	0	0	1	1	0	0	0	0	0	0	0	1	1	0	0	0	0	0	0	0	1	1	0	1	1	0	0	0	0	1	1	0
MAGB3_HUMAN	Melanoma-associated antigen B3 OS=Homo sapiens GN=MAGEB3 PE=2 SV=2	1.594	0.4737	0.583009	1	1	0	0	0	0	0	0	0	0	0	0	0	0	0	0	0	0	0	0	0	0	0	0	0	0	0	0	0	0	0	0	0	0	0	0	0	0	0	0	0	0	0	0	0
TF3C3_HUMAN	General transcription factor 3C polypeptide 3 OS=Homo sapiens GN=GTF3C3 PE=1 SV=1	1.547	0.5074	0.190611	0	0	0	0	0	0	1	1	1	0	0	0	0	0	0	0	0	0	0	0	0	0	0	0	0	0	0	0	0	0	0	0	0	0	0	0	0	0	0	0	0	0	0	0	0
AMPL_HUMAN	Cytosol aminopeptidase OS=Homo sapiens GN=LAP3 PE=1 SV=3	2.378	0.6212	0.088224	4	4	4	0	0	0	1	1	1	4	4	4	1	1	1	5	5	5	0	0	0	0	0	0	3	3	3	1	1	1	0	0	0	0	0	0	2	2	2	0	0	0	0	0	0
ANX11_HUMAN	Annexin A11 OS=Homo sapiens GN=ANXA11 PE=1 SV=1	2.999	0.7035	0.053757	5	5	5	1	1	1	4	4	3	3	3	3	0	0	0	4	4	4	0	0	0	1	1	1	3	3	2	0	0	0	0	0	0	0	0	0	3	3	3	0	0	0	1	1	1
ANXA7_HUMAN	Annexin A7 OS=Homo sapiens GN=ANXA7 PE=1 SV=3	2.742	0.7385	0.00313	5	5	5	1	1	1	3	3	3	5	5	5	2	2	2	3	3	3	4	4	4	2	2	2	2	2	2	5	5	5	1	1	1	2	2	2	4	4	4	3	3	3	3	3	3
AN32D_HUMAN	Acidic leucine-rich nuclear phosphoprotein 32 family member D OS=Homo sapiens GN=ANP32D PE=1 SV=2	1.988	0.4893	0.064372	1	1	0	0	0	0	1	1	0	0	0	0	1	1	0	1	1	0	0	0	0	2	2	0	1	1	0	0	0	0	0	0	0	1	1	0	0	0	0	2	2	0	1	1	0
ATIF1_HUMAN	ATPase inhibitor, mitochondrial OS=Homo sapiens GN=ATPIF1 PE=1 SV=1	2.704	0.5026	0.040225	2	2	2	0	0	0	1	1	1	1	1	1	1	1	1	2	2	2	0	0	0	0	0	0	2	2	2	1	1	1	0	0	0	1	1	1	2	2	2	0	0	0	1	1	1
SRSF5_HUMAN	Serine/arginine-rich splicing factor 5 OS=Homo sapiens GN=SRSF5 PE=1 SV=1	3.645	0.7166	0.014186	2	2	1	1	1	0	1	1	0	3	2	1	1	1	0	2	2	1	0	0	0	2	2	1	2	2	1	2	2	1	0	0	0	2	2	1	3	2	1	1	1	0	1	1	0
GAK_HUMAN	Cyclin-G-associated kinase OS=Homo sapiens GN=GAK PE=1 SV=2	1.363	0.5427	0.023953	3	3	3	1	1	1	1	1	1	0	0	0	0	0	0	0	0	0	0	0	0	0	0	0	0	0	0	0	0	0	0	0	0	0	0	0	0	0	0	0	0	0	0	0	0
XPO1_HUMAN	Exportin-1 OS=Homo sapiens GN=XPO1 PE=1 SV=1	2.455	0.5124	0.009032	4	3	3	0	0	0	0	0	0	1	1	1	0	0	0	1	1	1	0	0	0	1	1	1	0	0	0	1	1	1	0	0	0	0	0	0	2	2	2	0	0	0	1	1	1
RBM4B_HUMAN	RNA-binding protein 4B OS=Homo sapiens GN=RBM4B PE=1 SV=1	2.301	0.59	0.014626	2	2	0	0	0	0	1	1	0	0	0	0	1	1	0	1	1	0	0	0	0	1	1	0	5	5	0	1	1	0	1	1	0	1	1	0	1	1	0	1	1	0	2	2	0
TBA1A_HUMAN	Tubulin alpha-1A chain OS=Homo sapiens GN=TUBA1A PE=1 SV=1	4.095	0.8291	0.000952	83	19	0	33	12	0	69	22	0	48	16	0	26	13	0	42	15	0	33	9	0	22	12	0	33	15	0	35	15	0	16	10	0	27	12	0	45	17	0	17	9	0	18	10	0
TBA1B_HUMAN	Tubulin alpha-1B chain OS=Homo sapiens GN=TUBA1B PE=1 SV=1	4.095	0.8291	0.000952	83	19	0	33	12	0	69	22	0	48	16	0	26	13	0	42	15	0	33	9	0	22	12	0	33	15	0	35	15	0	16	10	0	27	12	0	45	17	0	17	9	0	18	10	0
F175B_HUMAN	BRISC complex subunit Abro1 OS=Homo sapiens GN=FAM175B PE=1 SV=2	1.709	0.2662	1.17049	0	0	0	0	0	0	1	1	1	0	0	0	0	0	0	0	0	0	0	0	0	0	0	0	0	0	0	0	0	0	0	0	0	0	0	0	0	0	0	0	0	0	0	0	0
PNPT1_HUMAN	Polyribonucleotide nucleotidyltransferase 1, mitochondrial OS=Homo sapiens GN=PNPT1 PE=1 SV=2	1.772	0.4421	0.110077	1	1	1	0	0	0	2	2	2	1	1	1	0	0	0	3	3	3	0	0	0	0	0	0	1	1	1	0	0	0	0	0	0	1	1	1	2	2	2	0	0	0	0	0	0
TRA2B_HUMAN	Transformer-2 protein homolog beta OS=Homo sapiens GN=TRA2B PE=1 SV=1	2.459	0.598	0.005499	3	3	3	4	4	2	4	4	2	4	3	2	2	2	1	4	4	3	1	1	0	1	1	1	2	2	2	4	4	2	2	2	1	3	3	2	1	1	1	1	1	0	4	3	1
TPM1_HUMAN	Tropomyosin alpha-1 chain OS=Homo sapiens GN=TPM1 PE=1 SV=2	3.041	0.6364	0.02282	8	7	0	1	1	0	3	3	0	8	7	0	4	4	0	5	5	0	4	4	0	2	2	0	6	6	0	2	2	0	3	3	0	7	7	0	9	7	0	2	2	0	5	5	0
YBOX1_HUMAN	Nuclease-sensitive element-binding protein 1 OS=Homo sapiens GN=YBX1 PE=1 SV=3	3.69	0.7569	0.017324	3	3	2	4	4	4	1	1	1	4	4	2	2	2	1	2	2	1	0	0	0	3	3	3	1	1	1	4	4	4	0	0	0	3	3	1	3	3	3	0	0	0	0	0	0
SSRA_HUMAN	Translocon-associated protein subunit alpha OS=Homo sapiens GN=SSR1 PE=1 SV=3	1.629	0.551	0.200748	1	1	1	0	0	0	1	1	1	1	1	1	0	0	0	2	2	2	0	0	0	0	0	0	1	1	1	0	0	0	0	0	0	0	0	0	1	1	1	0	0	0	0	0	0
TAGL3_HUMAN	Transgelin-3 OS=Homo sapiens GN=TAGLN3 PE=1 SV=2	2.632	0.7049	0.006089	1	1	0	1	1	0	1	1	0	1	1	0	1	1	0	1	1	0	1	1	0	1	1	0	1	1	0	2	1	0	0	0	0	2	1	0	2	2	0	1	1	0	1	1	0
TACC3_HUMAN	Transforming acidic coiled-coil-containing protein 3 OS=Homo sapiens GN=TACC3 PE=1 SV=1	2.11	0.7382	0.05594	1	1	1	0	0	0	0	0	0	1	1	1	0	0	0	0	0	0	0	0	0	0	0	0	1	1	1	1	1	1	0	0	0	0	0	0	1	1	1	0	0	0	1	1	1
MTNB_HUMAN	Probable methylthioribulose-1-phosphate dehydratase OS=Homo sapiens GN=APIP PE=1 SV=1	2.35	0.5906	0.464656	0	0	0	0	0	0	0	0	0	0	0	0	0	0	0	0	0	0	0	0	0	0	0	0	1	1	1	0	0	0	0	0	0	0	0	0	0	0	0	0	0	0	0	0	0
NUBP1_HUMAN	Cytosolic Fe-S cluster assembly factor NUBP1 OS=Homo sapiens GN=NUBP1 PE=1 SV=2	1.663	0.396	0.414444	1	1	1	0	0	0	1	1	1	1	1	1	0	0	0	1	1	1	0	0	0	0	0	0	0	0	0	0	0	0	0	0	0	0	0	0	0	0	0	0	0	0	0	0	0
NAT10_HUMAN	N-acetyltransferase 10 OS=Homo sapiens GN=NAT10 PE=1 SV=2	1.97	0.6852	0.002759	0	0	0	0	0	0	0	0	0	3	3	3	1	1	1	1	1	1	0	0	0	0	0	0	2	2	2	2	2	2	0	0	0	1	1	1	0	0	0	0	0	0	0	0	0
K2C5_HUMAN	Keratin, type II cytoskeletal 5 OS=Homo sapiens GN=KRT5 PE=1 SV=3	3.596	0.7838	0.001668	38	28	19	39	23	14	39	27	16	68	37	23	87	29	18	71	37	24	135	32	18	67	25	13	56	27	15	76	28	16	75	29	17	79	31	19	63	27	16	62	26	15	39	18	8
GNAI3_HUMAN	Guanine nucleotide-binding protein G(k) subunit alpha OS=Homo sapiens GN=GNAI3 PE=1 SV=3	2.329	0.5987	0.003423	1	1	0	1	1	0	0	0	0	1	1	0	0	0	0	1	1	0	0	0	0	0	0	0	0	0	0	0	0	0	0	0	0	0	0	0	1	1	0	0	0	0	0	0	0
ZFR_HUMAN	Zinc finger RNA-binding protein OS=Homo sapiens GN=ZFR PE=1 SV=2	2.301	0.6177	0.048336	1	1	1	0	0	0	1	1	1	3	3	3	0	0	0	4	4	4	1	1	1	0	0	0	2	2	2	1	1	1	0	0	0	2	2	2	0	0	0	0	0	0	1	1	1
PREP_HUMAN	Presequence protease, mitochondrial OS=Homo sapiens GN=PITRM1 PE=1 SV=2	1.975	0.5828	0.018099	1	1	1	0	0	0	0	0	0	1	1	1	0	0	0	1	1	1	0	0	0	0	0	0	1	1	1	0	0	0	0	0	0	0	0	0	0	0	0	0	0	0	0	0	0
PIWL3_HUMAN	Piwi-like protein 3 OS=Homo sapiens GN=PIWIL3 PE=2 SV=2	1.18	0.1754	0.54627	0	0	0	0	0	0	0	0	0	0	0	0	0	0	0	0	0	0	0	0	0	0	0	0	0	0	0	1	1	1	0	0	0	0	0	0	0	0	0	0	0	0	0	0	0
TES_HUMAN	Testin OS=Homo sapiens GN=TES PE=1 SV=1	1.987	0.6467	0.087728	3	3	3	0	0	0	1	1	1	3	3	3	0	0	0	3	3	3	0	0	0	0	0	0	2	2	2	0	0	0	0	0	0	1	1	1	2	2	2	1	1	1	1	1	1
DPOLA_HUMAN	DNA polymerase alpha catalytic subunit OS=Homo sapiens GN=POLA1 PE=1 SV=2	1.599	0.3397	0.254305	1	1	1	1	1	1	0	0	0	0	0	0	0	0	0	0	0	0	0	0	0	0	0	0	0	0	0	0	0	0	0	0	0	0	0	0	0	0	0	0	0	0	0	0	0
GGNB2_HUMAN	Gametogenetin-binding protein 2 OS=Homo sapiens GN=GGNBP2 PE=1 SV=1	1.141	0.2918	1.62482	0	0	0	0	0	0	1	1	1	0	0	0	0	0	0	0	0	0	0	0	0	0	0	0	0	0	0	0	0	0	0	0	0	0	0	0	0	0	0	0	0	0	0	0	0
IRS2_HUMAN	Insulin receptor substrate 2 OS=Homo sapiens GN=IRS2 PE=1 SV=2	1.83	0.5197	0.155645	0	0	0	0	0	0	1	1	1	1	1	1	0	0	0	0	0	0	0	0	0	0	0	0	0	0	0	0	0	0	0	0	0	0	0	0	0	0	0	0	0	0	0	0	0
TBA1C_HUMAN	Tubulin alpha-1C chain OS=Homo sapiens GN=TUBA1C PE=1 SV=1	4.095	0.8291	0.000952	83	19	1	33	12	0	68	21	0	49	17	1	26	13	0	42	15	0	33	9	0	21	11	0	33	15	0	34	14	0	16	10	0	26	11	0	45	17	1	17	9	0	18	10	0
RAI3_HUMAN	Retinoic acid-induced protein 3 OS=Homo sapiens GN=GPRC5A PE=1 SV=2	1.682	0.3989	0.063829	1	1	1	0	0	0	0	0	0	2	2	2	1	1	1	1	1	1	1	1	1	0	0	0	0	0	0	1	1	1	0	0	0	1	1	1	1	1	1	0	0	0	0	0	0
HXK1_HUMAN	Hexokinase-1 OS=Homo sapiens GN=HK1 PE=1 SV=3	2.672	0.7102	0.029745	6	6	4	4	4	3	9	9	5	7	7	6	2	2	2	10	10	9	1	1	1	2	2	2	5	5	4	5	5	4	0	0	0	2	2	1	3	3	2	0	0	0	2	2	1
CUL9_HUMAN	Cullin-9 OS=Homo sapiens GN=CUL9 PE=1 SV=2	1.347	0.2339	0.633817	0	0	0	0	0	0	1	1	1	1	1	1	0	0	0	0	0	0	0	0	0	0	0	0	0	0	0	0	0	0	0	0	0	0	0	0	0	0	0	0	0	0	0	0	0
MPEG1_HUMAN	Macrophage-expressed gene 1 protein OS=Homo sapiens GN=MPEG1 PE=2 SV=1	1.21	0.1902	0.576727	0	0	0	0	0	0	0	0	0	1	1	1	0	0	0	0	0	0	0	0	0	0	0	0	0	0	0	1	1	1	0	0	0	0	0	0	1	1	1	0	0	0	0	0	0
F10A5_HUMAN	Putative protein FAM10A5 OS=Homo sapiens GN=ST13P5 PE=5 SV=1	3.386	0.7431	0.006886	3	3	0	0	0	0	6	6	0	3	3	0	2	2	0	5	5	0	1	1	0	0	0	0	3	3	0	3	3	0	0	0	0	2	2	0	5	4	0	1	1	0	2	2	0
COR1B_HUMAN	Coronin-1B OS=Homo sapiens GN=CORO1B PE=1 SV=1	2.128	0.5648	0.23765	1	1	1	0	0	0	0	0	0	0	0	0	0	0	0	0	0	0	0	0	0	0	0	0	3	3	3	0	0	0	0	0	0	0	0	0	0	0	0	0	0	0	0	0	0
GRHPR_HUMAN	Glyoxylate reductase/hydroxypyruvate reductase OS=Homo sapiens GN=GRHPR PE=1 SV=1	1.631	0.3771	0.346379	0	0	0	0	0	0	0	0	0	0	0	0	0	0	0	0	0	0	0	0	0	0	0	0	0	0	0	0	0	0	0	0	0	0	0	0	1	1	1	0	0	0	0	0	0
SUCB1_HUMAN	Succinyl-CoA ligase [ADP-forming] subunit beta, mitochondrial OS=Homo sapiens GN=SUCLA2 PE=1 SV=3	1.915	0.4731	0.35523	0	0	0	0	0	0	0	0	0	0	0	0	0	0	0	1	1	1	0	0	0	0	0	0	0	0	0	1	1	1	0	0	0	0	0	0	0	0	0	0	0	0	0	0	0
CBX1_HUMAN	Chromobox protein homolog 1 OS=Homo sapiens GN=CBX1 PE=1 SV=1	2.409	0.562	0.019268	0	0	0	0	0	0	0	0	0	1	1	1	1	1	1	0	0	0	0	0	0	0	0	0	2	2	2	0	0	0	0	0	0	1	1	1	0	0	0	0	0	0	0	0	0
LDHB_HUMAN	L-lactate dehydrogenase B chain OS=Homo sapiens GN=LDHB PE=1 SV=2	3.81	0.7394	0.001404	18	14	14	8	8	8	17	12	12	17	12	12	9	9	9	20	13	13	7	7	7	13	10	10	16	11	11	13	10	10	6	6	6	13	10	10	22	12	12	8	6	6	16	10	10
K2C6A_HUMAN	Keratin, type II cytoskeletal 6A OS=Homo sapiens GN=KRT6A PE=1 SV=3	3.596	0.7725	0.001668	33	24	2	32	14	1	32	22	2	57	30	2	73	20	2	58	28	3	170	29	2	59	21	1	47	21	2	79	27	2	69	21	1	67	23	2	52	21	1	52	17	1	39	18	1
HSP76_HUMAN	Heat shock 70 kDa protein 6 OS=Homo sapiens GN=HSPA6 PE=1 SV=2	4.142	0.7767	0.000309	47	9	0	115	8	0	37	9	0	25	9	0	26	8	0	19	8	0	34	7	0	23	8	0	20	8	0	24	8	0	15	7	0	20	8	0	22	8	0	25	7	0	21	7	0
BAG3_HUMAN	BAG family molecular chaperone regulator 3 OS=Homo sapiens GN=BAG3 PE=1 SV=3	2.705	0.7233	0.041253	9	8	8	1	1	1	2	2	2	0	0	0	1	1	1	1	1	1	0	0	0	1	1	1	1	1	1	0	0	0	1	1	1	0	0	0	1	1	1	1	1	1	1	1	1
CAV1_HUMAN	Caveolin-1 OS=Homo sapiens GN=CAV1 PE=1 SV=4	2.384	0.4669	0.310147	1	1	1	0	0	0	0	0	0	0	0	0	0	0	0	0	0	0	0	0	0	0	0	0	0	0	0	0	0	0	0	0	0	0	0	0	0	0	0	0	0	0	0	0	0
MYH1_HUMAN	Myosin-1 OS=Homo sapiens GN=MYH1 PE=1 SV=3	1.991	0.5563	0.224977	0	0	0	0	0	0	0	0	0	0	0	0	0	0	0	0	0	0	2	2	0	0	0	0	0	0	0	0	0	0	0	0	0	0	0	0	0	0	0	0	0	0	0	0	0
PPCE_HUMAN	Prolyl endopeptidase OS=Homo sapiens GN=PREP PE=1 SV=2	1.617	0.3123	0.570765	1	1	1	0	0	0	0	0	0	0	0	0	0	0	0	0	0	0	0	0	0	0	0	0	0	0	0	0	0	0	0	0	0	0	0	0	1	1	1	0	0	0	0	0	0
K2C6C_HUMAN	Keratin, type II cytoskeletal 6C OS=Homo sapiens GN=KRT6C PE=1 SV=3	3.596	0.7725	0.001668	31	22	0	31	13	0	30	20	0	57	30	0	72	19	0	58	28	0	159	28	0	59	21	0	46	21	0	77	26	0	69	21	0	67	23	0	52	21	0	51	16	0	38	17	0
EIF3H_HUMAN	Eukaryotic translation initiation factor 3 subunit H OS=Homo sapiens GN=EIF3H PE=1 SV=1	3.871	0.8091	0.035798	6	6	6	2	2	2	4	4	4	6	6	6	2	2	2	5	5	5	1	1	1	4	4	4	4	4	4	2	2	2	2	2	2	5	5	5	4	4	4	1	1	1	5	5	5
UB2L3_HUMAN	Ubiquitin-conjugating enzyme E2 L3 OS=Homo sapiens GN=UBE2L3 PE=1 SV=1	2.268	0.566	0.012072	1	1	1	1	1	1	0	0	0	1	1	1	1	1	1	0	0	0	1	1	1	2	2	2	1	1	1	1	1	1	1	1	1	2	2	2	2	2	2	1	1	1	2	2	2
HCD2_HUMAN	3-hydroxyacyl-CoA dehydrogenase type-2 OS=Homo sapiens GN=HSD17B10 PE=1 SV=3	2.129	0.7295	0.013598	2	2	2	1	1	1	3	3	3	2	2	2	1	1	1	5	5	5	0	0	0	1	1	1	4	4	4	1	1	1	0	0	0	2	2	2	2	2	2	0	0	0	0	0	0
PGRC2_HUMAN	Membrane-associated progesterone receptor component 2 OS=Homo sapiens GN=PGRMC2 PE=1 SV=1	1.707	0.4968	0.522453	0	0	0	0	0	0	0	0	0	0	0	0	0	0	0	1	1	1	0	0	0	0	0	0	0	0	0	0	0	0	0	0	0	0	0	0	0	0	0	0	0	0	0	0	0
ACTN4_HUMAN	Alpha-actinin-4 OS=Homo sapiens GN=ACTN4 PE=1 SV=2	5.304	0.7903	0.00371	37	34	22	19	19	11	28	26	14	32	30	19	12	11	6	24	22	13	6	6	4	9	9	5	30	26	17	16	16	11	8	8	3	15	15	8	23	20	13	8	8	4	9	9	4
EBP_HUMAN	3-beta-hydroxysteroid-Delta(8),Delta(7)-isomerase OS=Homo sapiens GN=EBP PE=1 SV=3	2.383	0.4507	0.816669	0	0	0	0	0	0	0	0	0	1	1	1	0	0	0	0	0	0	0	0	0	0	0	0	0	0	0	0	0	0	0	0	0	0	0	0	0	0	0	0	0	0	0	0	0
SH3G1_HUMAN	Endophilin-A2 OS=Homo sapiens GN=SH3GL1 PE=1 SV=1	1.718	0.5083	0.279281	2	2	1	0	0	0	0	0	0	1	1	0	0	0	0	3	3	2	0	0	0	0	0	0	0	0	0	0	0	0	0	0	0	0	0	0	1	1	1	0	0	0	0	0	0
LMNB2_HUMAN	Lamin-B2 OS=Homo sapiens GN=LMNB2 PE=1 SV=3	2.491	0.7023	0.001277	3	3	2	6	5	2	4	3	0	6	6	5	4	4	2	3	3	0	6	4	2	4	2	1	3	3	2	3	3	2	1	1	0	5	4	2	5	4	3	2	2	1	3	3	2
GAPD1_HUMAN	GTPase-activating protein and VPS9 domain-containing protein 1 OS=Homo sapiens GN=GAPVD1 PE=1 SV=2	1.946	0.5288	0.107969	0	0	0	0	0	0	1	1	1	2	2	2	0	0	0	0	0	0	1	1	1	0	0	0	0	0	0	0	0	0	0	0	0	0	0	0	0	0	0	0	0	0	0	0	0
ORN_HUMAN	Oligoribonuclease, mitochondrial OS=Homo sapiens GN=REXO2 PE=1 SV=3	1.423	0.3619	1.32687	0	0	0	0	0	0	0	0	0	0	0	0	0	0	0	0	0	0	0	0	0	0	0	0	0	0	0	0	0	0	0	0	0	0	0	0	0	0	0	0	0	0	0	0	0
PTBP3_HUMAN	Polypyrimidine tract-binding protein 3 OS=Homo sapiens GN=PTBP3 PE=1 SV=2	2.473	0.5839	0.019574	4	4	1	1	1	0	3	3	0	4	4	1	1	1	0	2	2	0	1	1	0	1	1	0	3	3	1	1	1	0	1	1	0	3	3	0	1	1	0	1	1	0	1	1	0
UCRIL_HUMAN	Putative cytochrome b-c1 complex subunit Rieske-like protein 1 OS=Homo sapiens GN=UQCRFS1P1 PE=5 SV=1	1.899	0.5577	0.175195	1	1	0	0	0	0	1	1	0	2	2	0	0	0	0	4	4	0	0	0	0	0	0	0	1	1	0	1	1	0	0	0	0	0	0	0	1	1	0	1	1	0	1	1	0
SNX1_HUMAN	Sorting nexin-1 OS=Homo sapiens GN=SNX1 PE=1 SV=3	2.432	0.5703	0.049826	0	0	0	0	0	0	1	1	0	0	0	0	0	0	0	1	1	0	0	0	0	0	0	0	1	1	0	0	0	0	0	0	0	0	0	0	0	0	0	0	0	0	0	0	0
PDLI1_HUMAN	PDZ and LIM domain protein 1 OS=Homo sapiens GN=PDLIM1 PE=1 SV=4	2.193	0.5052	0.029245	0	0	0	0	0	0	0	0	0	1	1	1	0	0	0	3	3	3	0	0	0	0	0	0	0	0	0	0	0	0	0	0	0	0	0	0	0	0	0	0	0	0	0	0	0
PFD6_HUMAN	Prefoldin subunit 6 OS=Homo sapiens GN=PFDN6 PE=1 SV=1	1.427	0.4527	0.776769	1	1	1	0	0	0	0	0	0	0	0	0	0	0	0	0	0	0	0	0	0	0	0	0	0	0	0	0	0	0	0	0	0	0	0	0	0	0	0	0	0	0	0	0	0
KPRP_HUMAN	Keratinocyte proline-rich protein OS=Homo sapiens GN=KPRP PE=1 SV=1	2.778	0.5137	0.016966	1	1	1	2	2	2	1	1	1	4	3	3	0	0	0	3	3	3	2	2	2	1	1	1	2	2	2	1	1	1	1	1	1	1	1	1	0	0	0	2	2	2	1	1	1
2ABG_HUMAN	Serine/threonine-protein phosphatase 2A 55 kDa regulatory subunit B gamma isoform OS=Homo sapiens GN=PPP2R2C PE=2 SV=4	2.253	0.6434	0.002716	1	1	0	1	1	0	1	1	0	2	2	0	0	0	0	1	1	0	0	0	0	0	0	0	1	1	0	0	0	0	1	1	0	1	1	0	1	1	0	1	1	0	0	0	0
CNPY2_HUMAN	Protein canopy homolog 2 OS=Homo sapiens GN=CNPY2 PE=1 SV=1	1.775	0.7523	0.352204	0	0	0	0	0	0	1	1	1	1	1	1	0	0	0	1	1	1	0	0	0	0	0	0	0	0	0	0	0	0	0	0	0	0	0	0	0	0	0	0	0	0	0	0	0
PP6R1_HUMAN	Serine/threonine-protein phosphatase 6 regulatory subunit 1 OS=Homo sapiens GN=PPP6R1 PE=1 SV=5	2.154	0.6017	0.419946	1	1	1	0	0	0	0	0	0	1	1	1	0	0	0	0	0	0	0	0	0	0	0	0	0	0	0	0	0	0	0	0	0	0	0	0	0	0	0	0	0	0	0	0	0
ZAGL1_HUMAN	Putative zinc-alpha-2-glycoprotein-like 1 OS=Homo sapiens PE=5 SV=2	2.339	0.424	0.161072	0	0	0	0	0	0	0	0	0	1	1	0	1	1	0	0	0	0	0	0	0	0	0	0	0	0	0	0	0	0	1	1	0	0	0	0	0	0	0	0	0	0	0	0	0
LSM6_HUMAN	U6 snRNA-associated Sm-like protein LSm6 OS=Homo sapiens GN=LSM6 PE=1 SV=1	1.208	0.3369	0.47465	1	1	1	0	0	0	0	0	0	0	0	0	0	0	0	0	0	0	0	0	0	0	0	0	0	0	0	0	0	0	0	0	0	0	0	0	0	0	0	0	0	0	0	0	0
EIF3K_HUMAN	Eukaryotic translation initiation factor 3 subunit K OS=Homo sapiens GN=EIF3K PE=1 SV=1	1.706	0.5664	0.131937	2	2	2	0	0	0	1	1	1	2	2	2	0	0	0	1	1	1	1	1	1	1	1	1	0	0	0	1	1	1	0	0	0	0	0	0	1	1	1	0	0	0	0	0	0
CAC1B_HUMAN	Voltage-dependent N-type calcium channel subunit alpha-1B OS=Homo sapiens GN=CACNA1B PE=1 SV=1	1.107	0.1942	3.91848	0	0	0	0	0	0	0	0	0	0	0	0	0	0	0	0	0	0	0	0	0	0	0	0	0	0	0	0	0	0	0	0	0	0	0	0	0	0	0	0	0	0	0	0	0
CDC5L_HUMAN	Cell division cycle 5-like protein OS=Homo sapiens GN=CDC5L PE=1 SV=2	2.47	0.6979	0.005211	3	3	3	1	1	1	3	3	3	2	2	2	1	1	1	3	3	3	2	2	2	3	3	3	4	4	4	1	1	1	1	1	1	2	2	2	0	0	0	0	0	0	2	2	2
F209A_HUMAN	Protein FAM209A OS=Homo sapiens GN=FAM209A PE=2 SV=1	1.116	0.2294	3.80258	0	0	0	0	0	0	0	0	0	0	0	0	0	0	0	0	0	0	0	0	0	0	0	0	0	0	0	0	0	0	0	0	0	0	0	0	0	0	0	0	0	0	0	0	0
ROA2_HUMAN	Heterogeneous nuclear ribonucleoproteins A2/B1 OS=Homo sapiens GN=HNRNPA2B1 PE=1 SV=2	4.082	0.7994	0.002548	29	16	15	20	15	14	27	16	15	36	17	16	27	15	14	33	15	14	19	11	10	28	12	11	34	15	14	37	15	14	16	13	12	32	15	14	35	16	15	23	13	12	28	12	11
MCA3_HUMAN	Eukaryotic translation elongation factor 1 epsilon-1 OS=Homo sapiens GN=EEF1E1 PE=1 SV=1	2.779	0.6504	0.13558	8	7	7	5	5	5	4	4	4	1	1	1	1	1	1	0	0	0	1	1	1	0	0	0	0	0	0	0	0	0	1	1	1	0	0	0	1	1	1	1	1	1	2	2	2
UTS2_HUMAN	Urotensin-2 OS=Homo sapiens GN=UTS2 PE=1 SV=1	1.863	0.4171	0.017861	2	1	1	3	1	1	1	1	1	2	1	1	2	1	1	2	1	1	6	1	1	2	1	1	2	1	1	3	1	1	1	1	1	1	1	1	3	1	1	3	1	1	3	1	1
CENPF_HUMAN	Centromere protein F OS=Homo sapiens GN=CENPF PE=1 SV=2	2.426	0.6167	0.001961	5	5	5	0	0	0	2	2	2	2	2	2	1	1	1	0	0	0	0	0	0	0	0	0	2	2	2	2	2	2	0	0	0	1	1	1	6	6	6	0	0	0	1	1	1
TM9S3_HUMAN	Transmembrane 9 superfamily member 3 OS=Homo sapiens GN=TM9SF3 PE=1 SV=2	1.685	0.4154	0.685787	0	0	0	0	0	0	0	0	0	0	0	0	0	0	0	1	1	1	0	0	0	0	0	0	0	0	0	0	0	0	0	0	0	0	0	0	0	0	0	0	0	0	0	0	0
UBL4A_HUMAN	Ubiquitin-like protein 4A OS=Homo sapiens GN=UBL4A PE=1 SV=1	1.199	0.3367	0.134568	1	1	1	0	0	0	1	1	1	0	0	0	0	0	0	0	0	0	0	0	0	0	0	0	0	0	0	0	0	0	0	0	0	0	0	0	0	0	0	0	0	0	0	0	0
VASP_HUMAN	Vasodilator-stimulated phosphoprotein OS=Homo sapiens GN=VASP PE=1 SV=3	2.984	0.6627	0.030351	5	5	5	0	0	0	6	6	6	3	3	3	2	2	2	4	4	4	1	1	1	2	2	2	3	3	3	3	3	3	2	2	2	3	3	3	3	3	3	2	2	2	2	2	2
RL6_HUMAN	60S ribosomal protein L6 OS=Homo sapiens GN=RPL6 PE=1 SV=3	2.343	0.6624	0.141317	1	1	1	1	1	1	0	0	0	2	2	2	0	0	0	0	0	0	0	0	0	0	0	0	0	0	0	2	2	2	0	0	0	0	0	0	2	2	2	0	0	0	1	1	1
SMU1_HUMAN	WD40 repeat-containing protein SMU1 OS=Homo sapiens GN=SMU1 PE=1 SV=2	2.361	0.6479	0.035946	2	2	2	0	0	0	0	0	0	1	1	1	0	0	0	2	1	1	0	0	0	0	0	0	1	1	1	1	1	1	0	0	0	2	2	2	4	3	3	0	0	0	2	2	2
ADAS_HUMAN	Alkyldihydroxyacetonephosphate synthase, peroxisomal OS=Homo sapiens GN=AGPS PE=1 SV=1	2.594	0.7101	0.042748	4	4	4	0	0	0	2	2	2	2	2	2	1	1	1	2	2	2	1	1	1	1	1	1	3	3	3	2	2	2	0	0	0	1	1	1	1	1	1	0	0	0	0	0	0
RMXL1_HUMAN	RNA binding motif protein, X-linked-like-1 OS=Homo sapiens GN=RBMXL1 PE=1 SV=1	2.76	0.7133	0.007466	13	11	0	12	10	0	14	13	0	16	14	0	14	11	0	16	12	0	7	7	0	10	9	0	18	15	0	12	10	0	10	9	0	16	13	1	14	12	0	7	6	0	14	12	0
NUDT5_HUMAN	ADP-sugar pyrophosphatase OS=Homo sapiens GN=NUDT5 PE=1 SV=1	3.039	0.7282	0.025858	5	5	5	1	1	1	3	3	3	3	3	3	1	1	1	4	3	3	3	3	3	1	1	1	3	3	3	2	2	2	0	0	0	2	2	2	3	3	3	2	2	2	2	2	2
ARFP2_HUMAN	Arfaptin-2 OS=Homo sapiens GN=ARFIP2 PE=1 SV=1	1.204	0.2184	0.22958	0	0	0	0	0	0	0	0	0	0	0	0	0	0	0	0	0	0	0	0	0	0	0	0	0	0	0	0	0	0	0	0	0	0	0	0	0	0	0	0	0	0	0	0	0
TPM3L_HUMAN	Putative tropomyosin alpha-3 chain-like protein OS=Homo sapiens PE=5 SV=2	2.935	0.7584	0.003421	4	4	2	0	0	0	3	3	1	3	3	2	3	3	2	1	1	1	1	1	0	1	1	1	3	3	1	2	2	2	1	1	0	1	1	0	4	4	2	2	2	1	4	4	2
ADT2_HUMAN	ADP/ATP translocase 2 OS=Homo sapiens GN=SLC25A5 PE=1 SV=7	2.069	0.6875	0.02163	7	7	2	1	1	0	1	1	0	1	1	0	1	1	0	3	3	1	1	1	0	1	1	0	1	1	0	1	1	0	1	1	0	1	1	0	1	1	0	1	1	0	1	1	0
CYR61_HUMAN	Protein CYR61 OS=Homo sapiens GN=CYR61 PE=1 SV=1	1.795	0.4502	0.021625	2	2	2	1	1	1	1	1	1	1	1	1	0	0	0	1	1	1	0	0	0	0	0	0	0	0	0	0	0	0	0	0	0	0	0	0	0	0	0	0	0	0	0	0	0
CKAP5_HUMAN	Cytoskeleton-associated protein 5 OS=Homo sapiens GN=CKAP5 PE=1 SV=3	2.697	0.6444	0.049242	3	3	3	0	0	0	4	4	4	2	2	2	0	0	0	1	1	1	0	0	0	0	0	0	0	0	0	0	0	0	0	0	0	0	0	0	2	2	2	0	0	0	1	1	1
HDAC1_HUMAN	Histone deacetylase 1 OS=Homo sapiens GN=HDAC1 PE=1 SV=1	2.844	0.7556	0.027507	6	5	2	4	3	1	5	5	2	2	2	0	2	2	1	5	5	1	0	0	0	0	0	0	6	5	2	2	2	1	1	1	1	4	4	2	6	5	2	1	1	0	3	3	2
STAT1_HUMAN	Signal transducer and activator of transcription 1-alpha/beta OS=Homo sapiens GN=STAT1 PE=1 SV=2	2.174	0.5205	0.211455	2	2	2	0	0	0	0	0	0	1	1	1	0	0	0	0	0	0	0	0	0	0	0	0	2	2	2	0	0	0	0	0	0	0	0	0	0	0	0	0	0	0	0	0	0
GNAS1_HUMAN	Guanine nucleotide-binding protein G(s) subunit alpha isoforms XLas OS=Homo sapiens GN=GNAS PE=1 SV=2	2.329	0.5987	0.003423	2	2	0	1	1	0	0	0	0	1	1	0	0	0	0	1	1	0	0	0	0	0	0	0	0	0	0	0	0	0	0	0	0	0	0	0	1	1	0	0	0	0	0	0	0
EIF3G_HUMAN	Eukaryotic translation initiation factor 3 subunit G OS=Homo sapiens GN=EIF3G PE=1 SV=2	2.752	0.7246	0.028992	6	6	6	2	2	2	6	6	6	5	5	5	3	3	3	5	5	5	2	2	2	3	3	3	4	4	4	3	3	3	3	3	3	6	6	6	4	4	4	3	3	3	5	5	5
CCS_HUMAN	Copper chaperone for superoxide dismutase OS=Homo sapiens GN=CCS PE=1 SV=1	1.699	0.505	0.630378	0	0	0	0	0	0	1	1	1	1	1	1	0	0	0	0	0	0	0	0	0	0	0	0	0	0	0	0	0	0	0	0	0	0	0	0	0	0	0	0	0	0	0	0	0
VIGLN_HUMAN	Vigilin OS=Homo sapiens GN=HDLBP PE=1 SV=2	1.854	0.5803	0.015552	2	2	2	0	0	0	1	1	1	0	0	0	0	0	0	2	2	2	0	0	0	1	1	1	1	1	1	0	0	0	0	0	0	1	1	1	1	1	1	0	0	0	0	0	0
MAGAA_HUMAN	Melanoma-associated antigen 10 OS=Homo sapiens GN=MAGEA10 PE=2 SV=2	1.594	0.4737	0.583009	1	1	0	0	0	0	0	0	0	0	0	0	0	0	0	0	0	0	0	0	0	0	0	0	0	0	0	0	0	0	0	0	0	0	0	0	0	0	0	0	0	0	0	0	0
SSRD_HUMAN	Translocon-associated protein subunit delta OS=Homo sapiens GN=SSR4 PE=1 SV=1	2.057	0.6732	0.033877	4	3	3	2	1	1	3	3	3	1	1	1	2	1	1	1	1	1	0	0	0	2	1	1	0	0	0	2	1	1	1	1	1	1	1	1	1	1	1	1	1	1	0	0	0
PGK1_HUMAN	Phosphoglycerate kinase 1 OS=Homo sapiens GN=PGK1 PE=1 SV=3	3.912	0.7704	0.003888	29	22	16	9	8	7	25	20	16	22	20	15	16	13	11	27	19	15	10	8	6	13	12	9	23	17	13	18	14	9	8	7	6	18	16	13	28	19	14	10	8	6	16	11	9
TOM70_HUMAN	Mitochondrial import receptor subunit TOM70 OS=Homo sapiens GN=TOMM70A PE=1 SV=1	2.045	0.4266	0.061248	0	0	0	0	0	0	0	0	0	0	0	0	0	0	0	2	2	2	0	0	0	0	0	0	0	0	0	0	0	0	0	0	0	0	0	0	1	1	1	0	0	0	0	0	0
U2AF1_HUMAN	Splicing factor U2AF 35 kDa subunit OS=Homo sapiens GN=U2AF1 PE=1 SV=3	2.767	0.6995	0.014893	1	1	1	2	2	2	2	2	2	1	1	1	2	2	2	2	2	2	1	1	1	2	2	2	2	2	2	1	1	1	1	1	1	2	2	2	1	1	1	0	0	0	2	2	2
SDE2_HUMAN	Protein SDE2 homolog OS=Homo sapiens GN=SDE2 PE=1 SV=1	1.802	0.475	0.271513	0	0	0	0	0	0	0	0	0	0	0	0	0	0	0	0	0	0	0	0	0	0	0	0	0	0	0	0	0	0	0	0	0	0	0	0	0	0	0	0	0	0	0	0	0
FSTL1_HUMAN	Follistatin-related protein 1 OS=Homo sapiens GN=FSTL1 PE=1 SV=1	1.718	0.3306	0.191138	1	1	1	0	0	0	0	0	0	1	1	1	0	0	0	0	0	0	0	0	0	1	1	1	0	0	0	1	1	1	0	0	0	1	1	1	1	1	1	0	0	0	0	0	0
SCO2_HUMAN	Protein SCO2 homolog, mitochondrial OS=Homo sapiens GN=SCO2 PE=1 SV=3	2.148	0.3436	1.70712	1	1	1	0	0	0	0	0	0	1	1	1	0	0	0	0	0	0	0	0	0	0	0	0	0	0	0	0	0	0	0	0	0	0	0	0	0	0	0	0	0	0	0	0	0
SRSF7_HUMAN	Serine/arginine-rich splicing factor 7 OS=Homo sapiens GN=SRSF7 PE=1 SV=1	2.695	0.7386	0.000546	4	4	3	2	2	2	6	6	5	7	5	4	4	4	4	5	4	3	2	2	2	3	3	3	6	5	4	4	4	4	3	3	3	4	4	4	5	5	5	1	1	1	3	3	3
ACADV_HUMAN	Very long-chain specific acyl-CoA dehydrogenase, mitochondrial OS=Homo sapiens GN=ACADVL PE=1 SV=1	1.979	0.6612	0.054506	2	2	2	1	1	1	4	4	4	4	4	4	1	1	1	7	6	6	1	1	1	0	0	0	2	2	2	2	2	2	1	1	1	1	1	1	3	3	3	0	0	0	2	2	2
RAB6B_HUMAN	Ras-related protein Rab-6B OS=Homo sapiens GN=RAB6B PE=1 SV=1	2.279	0.584	0.068066	1	1	0	1	1	0	2	2	0	1	1	0	0	0	0	2	2	0	0	0	0	0	0	0	1	1	0	0	0	0	0	0	0	1	1	0	2	2	0	0	0	0	0	0	0
PDC6I_HUMAN	Programmed cell death 6-interacting protein OS=Homo sapiens GN=PDCD6IP PE=1 SV=1	2.796	0.7077	0.000408	11	11	11	1	1	1	4	4	4	11	11	11	3	3	3	7	7	7	0	0	0	3	3	3	5	5	5	4	4	4	1	1	1	4	4	4	5	5	5	0	0	0	2	2	2
NH2L1_HUMAN	NHP2-like protein 1 OS=Homo sapiens GN=NHP2L1 PE=1 SV=3	2.441	0.5614	0.515431	1	1	1	0	0	0	0	0	0	1	1	1	0	0	0	0	0	0	0	0	0	0	0	0	0	0	0	0	0	0	0	0	0	0	0	0	1	1	1	0	0	0	0	0	0
PSA5_HUMAN	Proteasome subunit alpha type-5 OS=Homo sapiens GN=PSMA5 PE=1 SV=3	3.882	0.7622	0.020236	6	5	5	4	4	4	5	5	5	5	5	5	1	1	1	3	3	3	0	0	0	0	0	0	4	4	4	1	1	1	1	1	1	2	2	2	3	3	3	0	0	0	1	1	1
SAE2_HUMAN	SUMO-activating enzyme subunit 2 OS=Homo sapiens GN=UBA2 PE=1 SV=2	1.84	0.6079	0.015649	1	1	1	0	0	0	1	1	1	1	1	1	0	0	0	1	1	1	1	1	1	1	1	1	2	2	2	0	0	0	0	0	0	0	0	0	1	1	1	0	0	0	0	0	0
PAP1L_HUMAN	Polyadenylate-binding protein 1-like OS=Homo sapiens GN=PABPC1L PE=2 SV=1	2.643	0.5871	0.00831	4	4	0	3	3	0	3	3	0	4	3	0	1	1	0	3	3	0	0	0	0	1	1	0	3	3	0	3	3	0	1	1	0	3	3	0	4	4	0	0	0	0	0	0	0
CLCB_HUMAN	Clathrin light chain B OS=Homo sapiens GN=CLTB PE=1 SV=1	1.618	0.5013	0.051857	2	2	2	1	1	1	1	1	1	0	0	0	0	0	0	0	0	0	0	0	0	0	0	0	0	0	0	0	0	0	0	0	0	0	0	0	1	1	1	0	0	0	0	0	0
KIF5A_HUMAN	Kinesin heavy chain isoform 5A OS=Homo sapiens GN=KIF5A PE=1 SV=2	3.579	0.7079	0.010269	4	4	0	2	2	0	3	3	0	2	2	0	0	0	0	2	2	0	1	1	0	3	3	0	3	3	0	1	1	0	1	1	0	2	2	0	1	1	0	2	2	0	2	2	0
LDLR_HUMAN	Low-density lipoprotein receptor OS=Homo sapiens GN=LDLR PE=1 SV=1	1.694	0.4097	0.228159	1	1	1	0	0	0	0	0	0	1	1	1	0	0	0	0	0	0	0	0	0	0	0	0	0	0	0	0	0	0	0	0	0	0	0	0	0	0	0	0	0	0	0	0	0
KAPCB_HUMAN	cAMP-dependent protein kinase catalytic subunit beta OS=Homo sapiens GN=PRKACB PE=1 SV=2	1.623	0.4878	0.018292	0	0	0	0	0	0	0	0	0	1	1	0	0	0	0	1	1	0	0	0	0	0	0	0	0	0	0	0	0	0	0	0	0	0	0	0	1	1	0	0	0	0	0	0	0
FGD3_HUMAN	FYVE, RhoGEF and PH domain-containing protein 3 OS=Homo sapiens GN=FGD3 PE=1 SV=1	1.22	0.2457	0.763384	0	0	0	0	0	0	0	0	0	1	1	1	0	0	0	1	1	1	0	0	0	0	0	0	1	1	1	1	1	1	0	0	0	1	1	1	0	0	0	0	0	0	1	1	1
UBA1_HUMAN	Ubiquitin-like modifier-activating enzyme 1 OS=Homo sapiens GN=UBA1 PE=1 SV=3	3.623	0.7709	0.001602	12	12	12	2	2	2	14	14	14	10	10	10	4	4	4	13	12	12	4	4	4	4	4	4	13	12	12	2	2	2	4	4	4	10	10	10	9	9	9	3	3	3	3	3	3
NDEL1_HUMAN	Nuclear distribution protein nudE-like 1 OS=Homo sapiens GN=NDEL1 PE=1 SV=1	1.845	0.2976	0.317958	0	0	0	0	0	0	0	0	0	0	0	0	1	1	0	0	0	0	0	0	0	0	0	0	0	0	0	0	0	0	0	0	0	1	1	0	0	0	0	0	0	0	0	0	0
RT09_HUMAN	28S ribosomal protein S9, mitochondrial OS=Homo sapiens GN=MRPS9 PE=1 SV=2	1.079	0.3294	0.984794	0	0	0	0	0	0	0	0	0	0	0	0	0	0	0	0	0	0	0	0	0	0	0	0	0	0	0	0	0	0	0	0	0	1	1	1	0	0	0	0	0	0	0	0	0
RS29_HUMAN	40S ribosomal protein S29 OS=Homo sapiens GN=RPS29 PE=1 SV=2	1.239	0.2752	0.272002	1	1	1	0	0	0	0	0	0	0	0	0	0	0	0	0	0	0	0	0	0	0	0	0	0	0	0	0	0	0	0	0	0	0	0	0	0	0	0	0	0	0	0	0	0
SH3L3_HUMAN	SH3 domain-binding glutamic acid-rich-like protein 3 OS=Homo sapiens GN=SH3BGRL3 PE=1 SV=1	2.248	0.6242	0.0704	2	2	2	0	0	0	0	0	0	1	1	1	0	0	0	1	1	1	0	0	0	0	0	0	0	0	0	2	2	2	0	0	0	1	1	1	1	1	1	0	0	0	1	1	1
PCBP3_HUMAN	Poly(rC)-binding protein 3 OS=Homo sapiens GN=PCBP3 PE=1 SV=2	3.081	0.7656	0.031634	3	3	0	4	4	0	4	4	0	4	4	0	2	2	0	3	3	0	2	2	0	2	2	0	2	2	0	4	4	0	3	2	0	2	2	0	5	5	0	1	1	0	1	1	0
AMRP_HUMAN	Alpha-2-macroglobulin receptor-associated protein OS=Homo sapiens GN=LRPAP1 PE=1 SV=1	2.346	0.6803	0.030876	0	0	0	0	0	0	0	0	0	1	1	1	2	2	2	0	0	0	1	1	1	1	1	1	1	1	1	1	1	1	1	1	1	0	0	0	2	2	2	1	1	1	1	1	1
5NTC_HUMAN	Cytosolic purine 5'-nucleotidase OS=Homo sapiens GN=NT5C2 PE=1 SV=1	1.256	0.2412	1.06239	0	0	0	0	0	0	0	0	0	1	1	1	0	0	0	0	0	0	0	0	0	0	0	0	0	0	0	0	0	0	0	0	0	0	0	0	0	0	0	0	0	0	0	0	0
K2C1B_HUMAN	Keratin, type II cytoskeletal 1b OS=Homo sapiens GN=KRT77 PE=1 SV=3	3.513	0.7381	0.00042	10	7	2	25	3	0	19	11	6	20	10	5	44	10	6	21	8	3	81	5	1	41	9	5	25	6	1	34	5	1	60	5	1	32	9	5	29	5	1	43	5	1	26	6	2
PRS8_HUMAN	26S protease regulatory subunit 8 OS=Homo sapiens GN=PSMC5 PE=1 SV=1	2.973	0.7378	0.004643	12	11	9	8	7	5	10	9	8	4	4	3	5	5	3	6	6	4	2	2	2	4	4	3	5	5	4	3	3	2	3	3	3	5	5	3	6	5	4	2	2	2	1	1	1
LYSM2_HUMAN	LysM and putative peptidoglycan-binding domain-containing protein 2 OS=Homo sapiens GN=LYSMD2 PE=1 SV=1	1.531	0.4187	0.736458	0	0	0	0	0	0	0	0	0	0	0	0	0	0	0	0	0	0	0	0	0	0	0	0	1	1	1	0	0	0	0	0	0	0	0	0	0	0	0	0	0	0	0	0	0
SRSF1_HUMAN	Serine/arginine-rich splicing factor 1 OS=Homo sapiens GN=SRSF1 PE=1 SV=2	2.639	0.6602	0.005003	9	9	9	6	6	6	11	9	9	9	8	8	9	8	8	12	10	10	4	4	4	5	5	5	8	7	7	7	7	7	7	7	7	8	7	7	8	7	7	5	5	5	5	5	5
RS26_HUMAN	40S ribosomal protein S26 OS=Homo sapiens GN=RPS26 PE=1 SV=3	1.99	0.4168	0.021551	1	1	0	2	2	0	2	2	0	1	1	0	2	2	0	2	2	0	0	0	0	2	2	0	2	2	0	2	2	0	1	1	0	1	1	0	1	1	0	1	1	0	1	1	0
RS26L_HUMAN	Putative 40S ribosomal protein S26-like 1 OS=Homo sapiens GN=RPS26P11 PE=5 SV=1	1.99	0.4168	0.021551	1	1	0	2	2	0	2	2	0	1	1	0	2	2	0	2	2	0	0	0	0	2	2	0	2	2	0	2	2	0	1	1	0	1	1	0	1	1	0	1	1	0	1	1	0
SF3B4_HUMAN	Splicing factor 3B subunit 4 OS=Homo sapiens GN=SF3B4 PE=1 SV=1	2.277	0.6574	0.09172	1	1	1	0	0	0	0	0	0	0	0	0	0	0	0	0	0	0	0	0	0	0	0	0	1	1	1	1	1	1	0	0	0	0	0	0	1	1	1	0	0	0	0	0	0
ARL5C_HUMAN	Putative ADP-ribosylation factor-like protein 5C OS=Homo sapiens GN=ARL5C PE=2 SV=4	1.513	0.197	0.633287	1	1	0	0	0	0	0	0	0	0	0	0	0	0	0	0	0	0	0	0	0	0	0	0	0	0	0	0	0	0	0	0	0	0	0	0	0	0	0	0	0	0	0	0	0
RBM22_HUMAN	Pre-mRNA-splicing factor RBM22 OS=Homo sapiens GN=RBM22 PE=1 SV=1	1.55	0.6897	0.426925	0	0	0	0	0	0	0	0	0	0	0	0	0	0	0	1	1	1	0	0	0	0	0	0	0	0	0	0	0	0	0	0	0	0	0	0	0	0	0	0	0	0	0	0	0
NHRF2_HUMAN	Na(+)/H(+) exchange regulatory cofactor NHE-RF2 OS=Homo sapiens GN=SLC9A3R2 PE=1 SV=2	1.704	0.4085	0.259433	0	0	0	0	0	0	0	0	0	0	0	0	0	0	0	0	0	0	0	0	0	0	0	0	0	0	0	0	0	0	0	0	0	0	0	0	1	1	1	0	0	0	0	0	0
MYH9_HUMAN	Myosin-9 OS=Homo sapiens GN=MYH9 PE=1 SV=4	4.174	0.795	0.000162	62	56	44	27	26	20	55	51	42	50	46	37	28	28	23	60	52	43	21	20	16	24	22	17	45	40	33	32	29	22	21	19	15	40	35	30	39	33	28	15	14	10	28	25	20
SHOT1_HUMAN	Shootin-1 OS=Homo sapiens GN=KIAA1598 PE=1 SV=4	1.827	0.4247	0.195063	2	2	2	0	0	0	1	1	1	1	1	1	1	1	1	0	0	0	0	0	0	1	1	1	0	0	0	1	1	1	0	0	0	0	0	0	1	1	1	0	0	0	1	1	1
ERO1A_HUMAN	ERO1-like protein alpha OS=Homo sapiens GN=ERO1L PE=1 SV=2	1.833	0.5717	0.172489	2	2	2	0	0	0	0	0	0	0	0	0	0	0	0	1	1	1	0	0	0	0	0	0	0	0	0	0	0	0	0	0	0	0	0	0	0	0	0	0	0	0	0	0	0
RCN1_HUMAN	Reticulocalbin-1 OS=Homo sapiens GN=RCN1 PE=1 SV=1	3.567	0.7147	0.027643	8	8	8	1	1	1	7	7	7	5	5	5	3	3	3	6	6	6	0	0	0	3	3	3	6	6	6	0	0	0	1	1	1	3	3	3	5	5	5	2	2	2	3	3	3
PSB3_HUMAN	Proteasome subunit beta type-3 OS=Homo sapiens GN=PSMB3 PE=1 SV=2	1.98	0.6035	0.155289	2	1	1	0	0	0	1	1	1	0	0	0	0	0	0	1	1	1	0	0	0	0	0	0	0	0	0	0	0	0	0	0	0	0	0	0	0	0	0	0	0	0	0	0	0
GSDMA_HUMAN	Gasdermin-A OS=Homo sapiens GN=GSDMA PE=2 SV=4	2.365	0.546	0.103873	0	0	0	0	0	0	0	0	0	1	1	1	0	0	0	0	0	0	1	1	1	0	0	0	0	0	0	0	0	0	0	0	0	0	0	0	1	1	1	1	1	1	0	0	0
PUF60_HUMAN	Poly(U)-binding-splicing factor PUF60 OS=Homo sapiens GN=PUF60 PE=1 SV=1	2.295	0.7063	0.002799	3	3	3	0	0	0	3	3	3	4	4	4	2	2	2	4	4	4	2	2	2	1	1	1	3	3	3	2	2	2	0	0	0	2	2	2	4	4	4	1	1	1	1	1	1
HNRPM_HUMAN	Heterogeneous nuclear ribonucleoprotein M OS=Homo sapiens GN=HNRNPM PE=1 SV=3	3.443	0.7356	0.000547	22	20	20	20	20	20	35	33	33	26	24	24	25	23	23	29	29	29	11	10	10	19	19	19	33	31	31	26	23	23	20	19	19	28	27	27	26	25	25	11	10	10	21	19	19
SIX5_HUMAN	Homeobox protein SIX5 OS=Homo sapiens GN=SIX5 PE=1 SV=3	2.024	0.3335	0.067873	1	1	0	1	1	0	0	0	0	1	1	0	1	1	0	1	1	0	1	1	0	1	1	0	1	1	0	1	1	0	1	1	0	0	0	0	0	0	0	1	1	0	0	0	0
AQR_HUMAN	Intron-binding protein aquarius OS=Homo sapiens GN=AQR PE=1 SV=4	1.702	0.6796	0.169307	2	2	2	0	0	0	1	1	1	0	0	0	0	0	0	0	0	0	0	0	0	0	0	0	0	0	0	0	0	0	0	0	0	0	0	0	0	0	0	0	0	0	0	0	0
HS902_HUMAN	Putative heat shock protein HSP 90-alpha A2 OS=Homo sapiens GN=HSP90AA2 PE=1 SV=2	3.141	0.6068	0.001304	11	6	0	8	4	0	11	7	0	14	5	0	12	4	0	10	6	0	19	3	0	10	4	0	6	3	0	13	3	0	3	3	0	11	5	0	14	4	0	8	3	0	9	4	0
DPYL1_HUMAN	Dihydropyrimidinase-related protein 1 OS=Homo sapiens GN=CRMP1 PE=1 SV=1	1.957	0.651	0.032369	1	1	0	0	0	0	1	1	0	1	1	0	1	1	0	3	3	0	0	0	0	1	1	0	0	0	0	1	1	0	1	1	0	1	1	0	1	1	0	1	1	0	0	0	0
HINT1_HUMAN	Histidine triad nucleotide-binding protein 1 OS=Homo sapiens GN=HINT1 PE=1 SV=2	1.881	0.519	0.069844	1	1	1	1	1	1	2	2	2	2	1	1	1	1	1	2	2	2	1	1	1	1	1	1	1	1	1	1	1	1	1	1	1	1	1	1	2	1	1	1	1	1	1	1	1
UB2E2_HUMAN	Ubiquitin-conjugating enzyme E2 E2 OS=Homo sapiens GN=UBE2E2 PE=1 SV=1	1.537	0.3754	0.071621	1	1	0	0	0	0	0	0	0	0	0	0	0	0	0	0	0	0	0	0	0	0	0	0	0	0	0	0	0	0	0	0	0	0	0	0	0	0	0	0	0	0	0	0	0
PIP_HUMAN	Prolactin-inducible protein OS=Homo sapiens GN=PIP PE=1 SV=1	1.527	0.2239	1.37223	0	0	0	0	0	0	0	0	0	0	0	0	0	0	0	0	0	0	0	0	0	0	0	0	0	0	0	0	0	0	0	0	0	0	0	0	0	0	0	0	0	0	0	0	0
ATPB_HUMAN	ATP synthase subunit beta, mitochondrial OS=Homo sapiens GN=ATP5B PE=1 SV=3	4.047	0.7242	0.002643	16	14	14	6	6	6	12	12	12	9	8	8	5	5	5	13	11	11	3	3	3	5	5	5	7	7	7	4	3	3	1	1	1	7	6	6	7	6	6	3	3	3	4	3	3
COR1C_HUMAN	Coronin-1C OS=Homo sapiens GN=CORO1C PE=1 SV=1	2.988	0.6441	0.021797	4	4	4	3	3	3	2	2	2	2	2	2	1	1	1	3	3	3	1	1	1	1	1	1	6	6	6	3	3	3	1	1	1	1	1	1	4	4	4	1	1	1	1	1	1
STAM2_HUMAN	Signal transducing adapter molecule 2 OS=Homo sapiens GN=STAM2 PE=1 SV=1	1.212	0.3597	1.18413	1	1	0	0	0	0	0	0	0	0	0	0	0	0	0	0	0	0	0	0	0	0	0	0	0	0	0	0	0	0	0	0	0	0	0	0	0	0	0	0	0	0	0	0	0
RBP56_HUMAN	TATA-binding protein-associated factor 2N OS=Homo sapiens GN=TAF15 PE=1 SV=1	3.13	0.7399	0.002328	5	4	3	2	2	1	3	3	2	5	4	2	3	2	1	3	3	2	4	3	2	4	4	3	5	4	3	6	5	3	4	4	3	5	4	3	5	4	2	3	3	2	5	5	4
PSMD8_HUMAN	26S proteasome non-ATPase regulatory subunit 8 OS=Homo sapiens GN=PSMD8 PE=1 SV=2	1.971	0.5609	0.440154	4	4	4	0	0	0	2	2	2	0	0	0	0	0	0	0	0	0	0	0	0	0	0	0	0	0	0	0	0	0	0	0	0	0	0	0	0	0	0	0	0	0	0	0	0
DJB11_HUMAN	DnaJ homolog subfamily B member 11 OS=Homo sapiens GN=DNAJB11 PE=1 SV=1	2.894	0.7239	0.249716	2	2	2	0	0	0	1	1	1	1	1	1	0	0	0	0	0	0	0	0	0	0	0	0	0	0	0	0	0	0	0	0	0	0	0	0	0	0	0	0	0	0	0	0	0
PRP19_HUMAN	Pre-mRNA-processing factor 19 OS=Homo sapiens GN=PRPF19 PE=1 SV=1	2.588	0.6774	0.001984	11	9	9	7	7	7	8	7	7	7	6	6	4	4	4	9	7	7	3	3	3	5	5	5	9	7	7	6	6	6	5	5	5	7	5	5	5	5	5	3	3	3	5	5	5
PYRG2_HUMAN	CTP synthase 2 OS=Homo sapiens GN=CTPS2 PE=1 SV=1	3.091	0.6027	0.158535	2	2	0	0	0	0	0	0	0	2	2	0	2	2	0	1	1	0	1	1	0	1	1	0	1	1	0	1	1	0	2	2	0	1	1	0	2	2	0	1	1	0	1	1	0
EIF3E_HUMAN	Eukaryotic translation initiation factor 3 subunit E OS=Homo sapiens GN=EIF3E PE=1 SV=1	2.034	0.619	0.164547	4	4	4	0	0	0	0	0	0	2	2	2	1	1	1	0	0	0	0	0	0	0	0	0	0	0	0	0	0	0	0	0	0	0	0	0	3	3	3	0	0	0	0	0	0
CI114_HUMAN	Uncharacterized protein C9orf114 OS=Homo sapiens GN=C9orf114 PE=1 SV=3	3.765	0.5769	0.843913	0	0	0	0	0	0	0	0	0	1	1	1	0	0	0	0	0	0	0	0	0	0	0	0	0	0	0	0	0	0	0	0	0	0	0	0	0	0	0	0	0	0	0	0	0
DNJC8_HUMAN	DnaJ homolog subfamily C member 8 OS=Homo sapiens GN=DNAJC8 PE=1 SV=2	1.757	0.4494	0.453479	1	1	1	0	0	0	0	0	0	1	1	1	0	0	0	2	2	2	0	0	0	0	0	0	0	0	0	1	1	1	0	0	0	1	1	1	2	2	2	0	0	0	0	0	0
K1C14_HUMAN	Keratin, type I cytoskeletal 14 OS=Homo sapiens GN=KRT14 PE=1 SV=4	4.321	0.8072	0.003087	29	24	6	28	16	3	34	25	7	52	27	5	50	24	8	61	32	9	123	21	7	54	19	4	35	20	4	44	17	3	49	24	7	59	25	6	33	21	6	39	15	3	34	14	2
ELOC_HUMAN	Transcription elongation factor B polypeptide 1 OS=Homo sapiens GN=TCEB1 PE=1 SV=1	2.451	0.6501	0.038218	1	1	1	0	0	0	0	0	0	1	1	1	0	0	0	1	1	1	0	0	0	1	1	1	0	0	0	0	0	0	0	0	0	0	0	0	1	1	1	0	0	0	0	0	0
MCES_HUMAN	mRNA cap guanine-N7 methyltransferase OS=Homo sapiens GN=RNMT PE=1 SV=1	1.815	0.6028	0.664377	1	1	1	0	0	0	0	0	0	0	0	0	0	0	0	0	0	0	0	0	0	0	0	0	0	0	0	0	0	0	0	0	0	0	0	0	0	0	0	0	0	0	0	0	0
VDAC2_HUMAN	Voltage-dependent anion-selective channel protein 2 OS=Homo sapiens GN=VDAC2 PE=1 SV=2	3.482	0.7051	0.028823	6	6	6	3	3	3	8	7	7	4	4	4	3	3	3	8	7	7	1	1	1	2	2	2	6	6	6	2	2	2	2	2	2	3	3	3	2	2	2	2	2	2	3	3	3
MOT4_HUMAN	Monocarboxylate transporter 4 OS=Homo sapiens GN=SLC16A3 PE=1 SV=1	3.213	0.6312	0.021294	3	2	2	1	1	1	3	3	3	2	2	2	1	1	1	3	3	3	1	1	1	1	1	1	2	2	2	1	1	1	1	1	1	2	2	2	1	1	1	0	0	0	1	1	1
JIP4_HUMAN	C-Jun-amino-terminal kinase-interacting protein 4 OS=Homo sapiens GN=SPAG9 PE=1 SV=4	1.743	0.6707	0.239565	2	2	2	0	0	0	2	2	2	0	0	0	0	0	0	0	0	0	0	0	0	0	0	0	0	0	0	0	0	0	0	0	0	0	0	0	0	0	0	0	0	0	0	0	0
LYPA2_HUMAN	Acyl-protein thioesterase 2 OS=Homo sapiens GN=LYPLA2 PE=1 SV=1	2.297	0.4739	0.030342	1	1	1	1	1	1	1	1	1	1	1	1	1	1	1	0	0	0	0	0	0	1	1	1	2	2	2	1	1	1	1	1	1	1	1	1	1	1	1	1	1	1	1	1	1
TF3C2_HUMAN	General transcription factor 3C polypeptide 2 OS=Homo sapiens GN=GTF3C2 PE=1 SV=2	1.77	0.4548	0.356052	2	2	2	0	0	0	2	2	2	0	0	0	0	0	0	0	0	0	0	0	0	0	0	0	1	1	1	0	0	0	0	0	0	0	0	0	0	0	0	0	0	0	0	0	0
GG6L1_HUMAN	Golgin subfamily A member 6-like protein 1 OS=Homo sapiens GN=GOLGA6L1 PE=2 SV=2	1.521	0.1981	0.619861	0	0	0	0	0	0	0	0	0	1	1	0	0	0	0	0	0	0	0	0	0	1	1	0	0	0	0	1	1	0	0	0	0	0	0	0	0	0	0	0	0	0	0	0	0
PGRC1_HUMAN	Membrane-associated progesterone receptor component 1 OS=Homo sapiens GN=PGRMC1 PE=1 SV=3	1.559	0.4035	0.455867	0	0	0	0	0	0	0	0	0	1	1	1	0	0	0	0	0	0	0	0	0	0	0	0	0	0	0	0	0	0	0	0	0	0	0	0	1	1	1	0	0	0	0	0	0
XPO2_HUMAN	Exportin-2 OS=Homo sapiens GN=CSE1L PE=1 SV=3	3.544	0.7056	0.003016	10	9	9	3	3	3	5	5	5	8	8	8	4	4	4	8	7	7	2	2	2	3	3	3	4	4	4	2	2	2	0	0	0	5	5	5	7	6	6	2	2	2	5	5	5
T131L_HUMAN	Transmembrane protein 131-like OS=Homo sapiens GN=KIAA0922 PE=1 SV=2	1.007	0.2046	0.671032	0	0	0	0	0	0	1	1	1	0	0	0	0	0	0	0	0	0	0	0	0	0	0	0	0	0	0	0	0	0	0	0	0	0	0	0	0	0	0	0	0	0	0	0	0
FA10_HUMAN	Coagulation factor X OS=Homo sapiens GN=F10 PE=1 SV=2	1.197	0.3618	2.4591	1	1	1	7	1	1	0	0	0	0	0	0	0	0	0	0	0	0	0	0	0	0	0	0	0	0	0	0	0	0	0	0	0	0	0	0	0	0	0	0	0	0	0	0	0
CLIP2_HUMAN	CAP-Gly domain-containing linker protein 2 OS=Homo sapiens GN=CLIP2 PE=1 SV=1	1.784	0.4641	1.22999	0	0	0	0	0	0	0	0	0	1	1	0	0	0	0	0	0	0	0	0	0	0	0	0	1	1	0	0	0	0	0	0	0	0	0	0	0	0	0	0	0	0	0	0	0
DD19B_HUMAN	ATP-dependent RNA helicase DDX19B OS=Homo sapiens GN=DDX19B PE=1 SV=1	1.601	0.5578	0.018427	3	3	0	0	0	0	0	0	0	1	1	0	0	0	0	1	1	0	0	0	0	0	0	0	1	1	0	0	0	0	0	0	0	0	0	0	1	1	0	0	0	0	0	0	0
TEBP_HUMAN	Prostaglandin E synthase 3 OS=Homo sapiens GN=PTGES3 PE=1 SV=1	2.095	0.5546	0.015566	2	2	2	1	1	1	3	2	2	2	1	1	1	1	1	3	2	2	1	1	1	2	2	2	2	2	2	0	0	0	1	1	1	1	1	1	3	3	3	2	2	2	2	2	2
K1C10_HUMAN	Keratin, type I cytoskeletal 10 OS=Homo sapiens GN=KRT10 PE=1 SV=6	4.589	0.7993	0.000949	71	31	22	85	30	20	80	31	21	146	36	25	142	31	20	97	27	17	307	22	14	162	28	18	89	26	17	132	25	17	137	29	19	134	30	20	111	27	18	165	29	19	73	20	14
RFA1_HUMAN	Replication protein A 70 kDa DNA-binding subunit OS=Homo sapiens GN=RPA1 PE=1 SV=2	4.091	0.7284	0.005483	6	6	6	2	2	2	5	5	5	7	7	7	4	4	4	4	4	4	1	1	1	2	2	2	6	6	6	2	2	2	1	1	1	3	3	3	4	4	4	2	2	2	4	4	4
SMCA1_HUMAN	Probable global transcription activator SNF2L1 OS=Homo sapiens GN=SMARCA1 PE=1 SV=2	2.078	0.5858	0.441577	0	0	0	0	0	0	0	0	0	1	1	0	0	0	0	1	1	0	0	0	0	0	0	0	1	1	0	0	0	0	0	0	0	0	0	0	0	0	0	0	0	0	0	0	0
AIP_HUMAN	AH receptor-interacting protein OS=Homo sapiens GN=AIP PE=1 SV=2	2.754	0.6738	0.017919	4	4	4	1	1	1	3	3	3	4	4	4	1	1	1	3	3	3	0	0	0	0	0	0	2	2	2	0	0	0	0	0	0	2	2	2	2	2	2	0	0	0	0	0	0
CPNE6_HUMAN	Copine-6 OS=Homo sapiens GN=CPNE6 PE=1 SV=3	1.819	0.4959	0.505419	1	1	0	0	0	0	0	0	0	0	0	0	0	0	0	0	0	0	0	0	0	0	0	0	0	0	0	0	0	0	0	0	0	0	0	0	0	0	0	0	0	0	0	0	0
RS27_HUMAN	40S ribosomal protein S27 OS=Homo sapiens GN=RPS27 PE=1 SV=3	3.18	0.6314	0.014497	5	4	3	2	2	1	5	4	3	6	3	2	4	2	1	4	3	2	0	0	0	1	1	1	3	2	1	2	1	1	0	0	0	3	2	1	2	1	1	1	1	1	3	2	1
FUBP2_HUMAN	Far upstream element-binding protein 2 OS=Homo sapiens GN=KHSRP PE=1 SV=4	2.565	0.6939	0.02814	6	6	5	4	4	3	6	6	5	7	7	6	5	5	4	7	7	6	3	3	2	6	6	5	8	8	7	5	5	4	4	4	3	7	7	6	7	7	6	4	4	3	5	5	4
AT2A1_HUMAN	Sarcoplasmic/endoplasmic reticulum calcium ATPase 1 OS=Homo sapiens GN=ATP2A1 PE=1 SV=1	2.469	0.6993	0.004084	6	6	0	0	0	0	2	2	0	3	3	0	2	2	0	3	3	0	1	1	0	2	2	0	5	5	0	0	0	0	0	0	0	3	3	0	4	4	0	1	1	0	3	3	0
MPRD_HUMAN	Cation-dependent mannose-6-phosphate receptor OS=Homo sapiens GN=M6PR PE=1 SV=1	2.256	0.5643	0.100923	0	0	0	0	0	0	0	0	0	0	0	0	0	0	0	1	1	1	0	0	0	0	0	0	0	0	0	0	0	0	0	0	0	0	0	0	0	0	0	0	0	0	0	0	0
1A30_HUMAN	HLA class I histocompatibility antigen, A-30 alpha chain OS=Homo sapiens GN=HLA-A PE=1 SV=2	2.621	0.7085	0.054574	1	1	0	1	1	0	2	2	0	0	0	0	0	0	0	1	1	0	0	0	0	0	0	0	0	0	0	0	0	0	0	0	0	0	0	0	1	1	0	1	1	0	0	0	0
CSRP1_HUMAN	Cysteine and glycine-rich protein 1 OS=Homo sapiens GN=CSRP1 PE=1 SV=3	4.437	0.7647	0.01127	6	4	4	4	4	4	6	4	4	6	4	4	5	4	4	7	5	5	1	1	1	4	4	4	6	5	5	5	4	4	3	2	2	6	4	4	6	4	4	3	3	3	2	2	2
BUD31_HUMAN	Protein BUD31 homolog OS=Homo sapiens GN=BUD31 PE=1 SV=2	1.068	0.235	2.52563	0	0	0	0	0	0	0	0	0	0	0	0	1	1	1	0	0	0	0	0	0	0	0	0	0	0	0	0	0	0	0	0	0	0	0	0	0	0	0	0	0	0	0	0	0
SNF5_HUMAN	SWI/SNF-related matrix-associated actin-dependent regulator of chromatin subfamily B member 1 OS=Homo sapiens GN=SMARCB1 PE=1 SV=2	1.706	0.1588	0.719782	0	0	0	0	0	0	0	0	0	0	0	0	0	0	0	0	0	0	0	0	0	0	0	0	0	0	0	1	1	1	0	0	0	0	0	0	0	0	0	0	0	0	0	0	0
HM20B_HUMAN	SWI/SNF-related matrix-associated actin-dependent regulator of chromatin subfamily E member 1-related OS=Homo sapiens GN=HMG20B PE=1 SV=1	1.2	0.4576	0.215741	0	0	0	0	0	0	0	0	0	0	0	0	0	0	0	0	0	0	0	0	0	0	0	0	1	1	1	0	0	0	0	0	0	0	0	0	0	0	0	0	0	0	0	0	0
HM13_HUMAN	Minor histocompatibility antigen H13 OS=Homo sapiens GN=HM13 PE=1 SV=1	2.407	0.7114	0.032611	2	1	1	1	1	1	2	2	2	1	1	1	0	0	0	1	1	1	0	0	0	1	1	1	1	1	1	1	1	1	0	0	0	1	1	1	2	1	1	1	1	1	1	1	1
CPNE2_HUMAN	Copine-2 OS=Homo sapiens GN=CPNE2 PE=1 SV=3	1.819	0.4959	0.505419	1	1	0	0	0	0	0	0	0	0	0	0	0	0	0	0	0	0	0	0	0	0	0	0	0	0	0	0	0	0	0	0	0	0	0	0	0	0	0	0	0	0	0	0	0
HSPB1_HUMAN	Heat shock protein beta-1 OS=Homo sapiens GN=HSPB1 PE=1 SV=2	3.693	0.7864	0.011209	11	10	10	9	7	7	14	9	9	8	8	8	5	4	4	10	8	8	5	4	4	3	3	3	13	10	10	2	2	2	4	4	4	6	5	5	8	7	7	3	3	3	4	4	4
BIN1_HUMAN	Myc box-dependent-interacting protein 1 OS=Homo sapiens GN=BIN1 PE=1 SV=1	1.313	0.4935	0.423439	0	0	0	0	0	0	0	0	0	0	0	0	1	1	1	0	0	0	0	0	0	0	0	0	1	1	1	0	0	0	0	0	0	0	0	0	2	2	1	0	0	0	0	0	0
ATLA3_HUMAN	Atlastin-3 OS=Homo sapiens GN=ATL3 PE=1 SV=1	2.711	0.6562	0.006108	2	2	2	0	0	0	1	1	1	0	0	0	0	0	0	0	0	0	0	0	0	0	0	0	0	0	0	0	0	0	0	0	0	0	0	0	0	0	0	0	0	0	0	0	0
GALT4_HUMAN	Polypeptide N-acetylgalactosaminyltransferase 4 OS=Homo sapiens GN=GALNT4 PE=1 SV=2	1.663	0.6332	0.295321	0	0	0	0	0	0	0	0	0	1	1	0	0	0	0	1	1	0	0	0	0	0	0	0	0	0	0	0	0	0	0	0	0	0	0	0	0	0	0	0	0	0	0	0	0
MAGBG_HUMAN	Melanoma-associated antigen B16 OS=Homo sapiens GN=MAGEB16 PE=4 SV=2	1.594	0.4737	0.583009	1	1	0	0	0	0	0	0	0	0	0	0	0	0	0	0	0	0	0	0	0	0	0	0	0	0	0	0	0	0	0	0	0	0	0	0	0	0	0	0	0	0	0	0	0
RPAP3_HUMAN	RNA polymerase II-associated protein 3 OS=Homo sapiens GN=RPAP3 PE=1 SV=2	1.814	0.2525	0.459486	1	1	1	0	0	0	0	0	0	0	0	0	0	0	0	0	0	0	0	0	0	0	0	0	0	0	0	0	0	0	0	0	0	0	0	0	0	0	0	0	0	0	0	0	0
VATE1_HUMAN	V-type proton ATPase subunit E 1 OS=Homo sapiens GN=ATP6V1E1 PE=1 SV=1	1.526	0.3277	0.799166	0	0	0	0	0	0	0	0	0	0	0	0	0	0	0	0	0	0	0	0	0	0	0	0	0	0	0	0	0	0	0	0	0	0	0	0	1	1	0	0	0	0	0	0	0
CTRO_HUMAN	Citron Rho-interacting kinase OS=Homo sapiens GN=CIT PE=1 SV=2	1.467	0.1459	0.143042	0	0	0	0	0	0	0	0	0	0	0	0	0	0	0	0	0	0	1	1	1	0	0	0	0	0	0	0	0	0	0	0	0	0	0	0	0	0	0	0	0	0	0	0	0
K1C16_HUMAN	Keratin, type I cytoskeletal 16 OS=Homo sapiens GN=KRT16 PE=1 SV=4	4.739	0.8097	0.001606	21	17	6	21	11	1	24	18	5	45	27	14	40	19	8	59	33	17	118	23	11	46	16	5	25	14	4	35	15	6	44	22	9	47	21	9	26	19	9	32	12	3	28	11	2
PRDX4_HUMAN	Peroxiredoxin-4 OS=Homo sapiens GN=PRDX4 PE=1 SV=1	2.592	0.6889	0.004437	8	5	3	7	3	1	9	6	4	9	4	2	8	4	2	12	5	3	15	2	0	9	3	1	9	4	2	9	3	1	6	2	0	8	3	1	11	3	1	8	3	1	9	3	1
PSA3_HUMAN	Proteasome subunit alpha type-3 OS=Homo sapiens GN=PSMA3 PE=1 SV=2	2.694	0.68	0.002533	9	9	9	8	8	8	8	8	8	5	5	5	4	4	4	10	9	9	2	2	2	3	3	3	8	8	8	4	4	4	4	4	4	6	6	6	5	5	5	5	5	5	7	7	7
KT33A_HUMAN	Keratin, type I cuticular Ha3-I OS=Homo sapiens GN=KRT33A PE=2 SV=2	2.959	0.7171	0.012524	0	0	0	0	0	0	7	7	0	3	3	0	3	3	0	0	0	0	0	0	0	0	0	0	0	0	0	0	0	0	0	0	0	0	0	0	0	0	0	0	0	0	0	0	0
FLRT3_HUMAN	Leucine-rich repeat transmembrane protein FLRT3 OS=Homo sapiens GN=FLRT3 PE=1 SV=1	1.451	0.1709	0.967071	0	0	0	0	0	0	0	0	0	0	0	0	0	0	0	0	0	0	0	0	0	0	0	0	0	0	0	0	0	0	0	0	0	0	0	0	0	0	0	0	0	0	0	0	0
AP2M1_HUMAN	AP-2 complex subunit mu OS=Homo sapiens GN=AP2M1 PE=1 SV=2	1.857	0.5191	0.017015	0	0	0	0	0	0	0	0	0	4	4	4	0	0	0	2	2	2	0	0	0	0	0	0	2	2	2	2	2	2	0	0	0	2	2	2	2	2	2	0	0	0	0	0	0
RL37A_HUMAN	60S ribosomal protein L37a OS=Homo sapiens GN=RPL37A PE=1 SV=2	2.201	0.5345	0.191656	0	0	0	1	1	1	1	1	1	2	2	2	0	0	0	2	2	2	0	0	0	1	1	1	1	1	1	0	0	0	1	1	1	1	1	1	0	0	0	0	0	0	0	0	0
MAP4_HUMAN	Microtubule-associated protein 4 OS=Homo sapiens GN=MAP4 PE=1 SV=3	2.867	0.7104	0.004476	9	9	9	3	3	3	9	9	9	9	9	9	6	6	6	11	10	10	3	3	3	4	4	4	11	11	11	8	8	8	2	2	2	7	7	7	11	11	11	3	3	3	5	5	5
NAA15_HUMAN	N-alpha-acetyltransferase 15, NatA auxiliary subunit OS=Homo sapiens GN=NAA15 PE=1 SV=1	2.224	0.6619	0.066277	0	0	0	0	0	0	1	1	1	6	6	6	0	0	0	4	4	4	1	1	1	1	1	1	2	2	2	1	1	1	0	0	0	3	3	3	1	1	1	0	0	0	1	1	1
RFC4_HUMAN	Replication factor C subunit 4 OS=Homo sapiens GN=RFC4 PE=1 SV=2	2.311	0.7248	0.005779	3	3	3	0	0	0	0	0	0	1	1	1	0	0	0	0	0	0	0	0	0	0	0	0	2	2	2	0	0	0	0	0	0	1	1	1	0	0	0	0	0	0	0	0	0
ILF2_HUMAN	Interleukin enhancer-binding factor 2 OS=Homo sapiens GN=ILF2 PE=1 SV=2	2.613	0.6761	0.017269	3	3	3	3	3	3	3	3	3	2	2	2	1	1	1	2	2	2	0	0	0	1	1	1	1	1	1	1	1	1	0	0	0	2	2	2	0	0	0	0	0	0	2	2	2
RB39A_HUMAN	Ras-related protein Rab-39A OS=Homo sapiens GN=RAB39A PE=2 SV=2	2.279	0.584	0.068066	1	1	0	1	1	0	1	1	0	1	1	0	0	0	0	1	1	0	0	0	0	0	0	0	1	1	0	0	0	0	0	0	0	1	1	0	1	1	0	0	0	0	0	0	0
RM12_HUMAN	39S ribosomal protein L12, mitochondrial OS=Homo sapiens GN=MRPL12 PE=1 SV=2	1.035	0.3758	0.037745	1	1	1	0	0	0	0	0	0	0	0	0	0	0	0	0	0	0	0	0	0	0	0	0	0	0	0	0	0	0	0	0	0	0	0	0	1	1	1	0	0	0	0	0	0
HN1_HUMAN	Hematological and neurological expressed 1 protein OS=Homo sapiens GN=HN1 PE=1 SV=3	1.968	0.4334	0.077086	0	0	0	0	0	0	0	0	0	0	0	0	0	0	0	0	0	0	0	0	0	0	0	0	0	0	0	0	0	0	0	0	0	0	0	0	0	0	0	0	0	0	0	0	0
AAPK1_HUMAN	5'-AMP-activated protein kinase catalytic subunit alpha-1 OS=Homo sapiens GN=PRKAA1 PE=1 SV=4	1.849	0.5441	0.202562	1	1	1	0	0	0	0	0	0	0	0	0	0	0	0	0	0	0	0	0	0	0	0	0	0	0	0	0	0	0	0	0	0	0	0	0	0	0	0	0	0	0	0	0	0
GLO2_HUMAN	Hydroxyacylglutathione hydrolase, mitochondrial OS=Homo sapiens GN=HAGH PE=1 SV=2	2.072	0.6404	0.011866	2	2	2	1	1	1	2	2	2	3	3	3	2	2	2	3	3	3	0	0	0	2	2	2	2	2	2	1	1	1	1	1	1	2	2	2	3	3	3	1	1	1	3	3	3
RSMB_HUMAN	Small nuclear ribonucleoprotein-associated proteins B and B' OS=Homo sapiens GN=SNRPB PE=1 SV=2	2.011	0.7539	0.229428	2	2	0	0	0	0	2	2	0	2	2	0	0	0	0	1	1	0	0	0	0	0	0	0	1	1	0	0	0	0	0	0	0	0	0	0	0	0	0	0	0	0	0	0	0
AHSA1_HUMAN	Activator of 90 kDa heat shock protein ATPase homolog 1 OS=Homo sapiens GN=AHSA1 PE=1 SV=1	2.612	0.5949	0.019034	3	3	3	0	0	0	2	2	2	3	3	3	0	0	0	4	4	4	0	0	0	0	0	0	3	3	3	1	1	1	0	0	0	0	0	0	2	2	2	0	0	0	1	1	1
KHDR1_HUMAN	KH domain-containing, RNA-binding, signal transduction-associated protein 1 OS=Homo sapiens GN=KHDRBS1 PE=1 SV=1	4.138	0.7512	0.008296	5	4	3	2	2	2	5	5	3	5	5	2	5	5	4	7	7	4	1	1	1	4	4	0	6	5	1	5	4	2	4	4	2	8	8	4	4	4	2	2	2	1	3	3	1
AT12A_HUMAN	Potassium-transporting ATPase alpha chain 2 OS=Homo sapiens GN=ATP12A PE=1 SV=3	2.304	0.5094	0.370164	0	0	0	1	1	0	1	1	0	1	1	0	0	0	0	0	0	0	0	0	0	0	0	0	0	0	0	0	0	0	0	0	0	0	0	0	0	0	0	0	0	0	0	0	0
EFTS_HUMAN	Elongation factor Ts, mitochondrial OS=Homo sapiens GN=TSFM PE=1 SV=2	1.802	0.3002	0.095611	0	0	0	0	0	0	0	0	0	0	0	0	0	0	0	0	0	0	0	0	0	0	0	0	1	1	1	0	0	0	0	0	0	0	0	0	0	0	0	0	0	0	0	0	0
HS71L_HUMAN	Heat shock 70 kDa protein 1-like OS=Homo sapiens GN=HSPA1L PE=1 SV=2	4.752	0.8253	0.001563	81	16	0	126	14	0	53	17	0	32	13	0	30	10	0	28	12	0	31	10	0	25	12	0	24	11	0	27	12	0	13	5	0	21	10	0	33	10	0	20	8	0	25	12	0
EF1D_HUMAN	Elongation factor 1-delta OS=Homo sapiens GN=EEF1D PE=1 SV=5	4.975	0.7561	0.00028	7	7	6	4	4	3	6	6	5	5	4	3	4	4	3	5	4	3	1	1	0	2	2	1	5	5	4	3	3	2	1	1	0	6	6	5	5	5	4	4	3	2	6	5	4
IF4A3_HUMAN	Eukaryotic initiation factor 4A-III OS=Homo sapiens GN=EIF4A3 PE=1 SV=4	3.132	0.6877	0.001619	12	11	10	2	2	2	6	6	4	9	9	8	4	4	4	8	8	6	1	1	1	3	3	2	5	5	4	3	3	3	4	4	4	5	5	4	6	6	5	1	1	1	4	4	3
PSA1_HUMAN	Proteasome subunit alpha type-1 OS=Homo sapiens GN=PSMA1 PE=1 SV=1	3.204	0.766	0.004878	17	15	15	9	8	8	11	10	10	9	8	8	7	6	6	8	7	7	4	4	4	6	5	5	7	6	6	6	6	6	5	4	4	8	7	7	9	8	8	7	6	6	4	4	4
AK1BF_HUMAN	Aldo-keto reductase family 1 member B15 OS=Homo sapiens GN=AKR1B15 PE=2 SV=1	1.881	0.3477	1.13403	0	0	0	0	0	0	0	0	0	0	0	0	0	0	0	1	1	0	0	0	0	0	0	0	0	0	0	0	0	0	0	0	0	0	0	0	0	0	0	0	0	0	0	0	0
PARK7_HUMAN	Protein DJ-1 OS=Homo sapiens GN=PARK7 PE=1 SV=2	2.871	0.7548	0.012074	5	5	5	2	2	2	5	5	5	6	6	6	2	2	2	4	4	4	1	1	1	2	2	2	4	4	4	3	3	3	2	2	2	4	4	4	7	5	5	1	1	1	5	5	5
RGPD8_HUMAN	RANBP2-like and GRIP domain-containing protein 8 OS=Homo sapiens GN=RGPD8 PE=1 SV=2	1.794	0.6805	0.163427	2	2	0	0	0	0	2	2	0	2	2	0	0	0	0	0	0	0	0	0	0	0	0	0	2	1	0	0	0	0	0	0	0	1	1	0	1	1	0	0	0	0	0	0	0
RS2_HUMAN	40S ribosomal protein S2 OS=Homo sapiens GN=RPS2 PE=1 SV=2	2.181	0.4975	0.246081	1	1	1	0	0	0	1	1	1	1	1	1	0	0	0	2	2	2	0	0	0	0	0	0	1	1	1	2	2	2	0	0	0	1	1	1	2	2	2	0	0	0	0	0	0
RBM39_HUMAN	RNA-binding protein 39 OS=Homo sapiens GN=RBM39 PE=1 SV=2	2.671	0.5491	0.006897	1	1	1	0	0	0	2	2	2	1	1	1	0	0	0	0	0	0	0	0	0	0	0	0	0	0	0	1	1	1	1	1	1	0	0	0	1	1	1	0	0	0	0	0	0
CD36_HUMAN	Platelet glycoprotein 4 OS=Homo sapiens GN=CD36 PE=1 SV=2	1.889	0.424	0.152169	0	0	0	1	1	1	0	0	0	0	0	0	0	0	0	0	0	0	0	0	0	0	0	0	0	0	0	0	0	0	0	0	0	0	0	0	0	0	0	0	0	0	0	0	0
CBS_HUMAN	Cystathionine beta-synthase OS=Homo sapiens GN=CBS PE=1 SV=2	2.498	0.7126	0.071026	4	4	4	1	1	1	3	3	3	1	1	1	0	0	0	3	3	3	2	2	2	1	1	1	2	2	2	3	3	3	1	1	1	3	3	3	3	3	3	1	1	1	2	2	2
RS23_HUMAN	40S ribosomal protein S23 OS=Homo sapiens GN=RPS23 PE=1 SV=3	2.551	0.6745	0.010998	2	2	2	4	3	3	2	2	2	3	2	2	4	3	3	4	4	4	1	1	1	0	0	0	4	3	3	2	2	2	0	0	0	3	2	2	2	2	2	0	0	0	2	2	2
RP1BL_HUMAN	Ras-related protein Rap-1b-like protein OS=Homo sapiens PE=2 SV=1	2.01	0.6836	0.027484	2	2	0	0	0	0	0	0	0	2	2	0	0	0	0	0	0	0	0	0	0	0	0	0	0	0	0	0	0	0	0	0	0	0	0	0	1	1	0	0	0	0	0	0	0
POF1B_HUMAN	Protein POF1B OS=Homo sapiens GN=POF1B PE=1 SV=3	3.117	0.6878	0.243015	0	0	0	0	0	0	0	0	0	1	1	1	1	1	1	1	1	1	1	1	1	0	0	0	0	0	0	0	0	0	0	0	0	1	1	1	1	1	1	0	0	0	0	0	0
LYSC_HUMAN	Lysozyme C OS=Homo sapiens GN=LYZ PE=1 SV=1	2.178	0.6523	0.103542	0	0	0	0	0	0	1	1	1	1	1	1	1	1	1	2	2	2	1	1	1	1	1	1	0	0	0	1	1	1	3	3	3	0	0	0	1	1	1	1	1	1	0	0	0
PSB1_HUMAN	Proteasome subunit beta type-1 OS=Homo sapiens GN=PSMB1 PE=1 SV=2	3.338	0.7233	0.006332	7	7	7	5	5	5	6	6	6	6	6	6	3	3	3	6	6	6	1	1	1	2	2	2	5	5	5	4	3	3	1	1	1	3	3	3	4	4	4	3	3	3	2	2	2
TPX2_HUMAN	Targeting protein for Xklp2 OS=Homo sapiens GN=TPX2 PE=1 SV=2	3.401	0.6689	0.03746	3	3	3	0	0	0	0	0	0	3	3	3	3	3	3	4	4	4	2	2	2	2	2	2	6	6	6	2	2	2	1	1	1	5	5	5	3	3	3	0	0	0	2	2	2
HDA10_HUMAN	Histone deacetylase 10 OS=Homo sapiens GN=HDAC10 PE=1 SV=1	1.883	0.3867	0.277765	0	0	0	0	0	0	0	0	0	1	1	1	0	0	0	0	0	0	1	1	1	0	0	0	1	1	1	0	0	0	0	0	0	0	0	0	1	1	1	0	0	0	1	1	1
CI064_HUMAN	UPF0553 protein C9orf64 OS=Homo sapiens GN=C9orf64 PE=1 SV=1	1.233	0.4266	1.17458	0	0	0	0	0	0	0	0	0	0	0	0	0	0	0	0	0	0	0	0	0	0	0	0	0	0	0	0	0	0	0	0	0	0	0	0	1	1	1	0	0	0	0	0	0
RL23A_HUMAN	60S ribosomal protein L23a OS=Homo sapiens GN=RPL23A PE=1 SV=1	3.031	0.6672	0.011661	6	4	4	3	3	3	4	3	3	10	6	6	9	6	6	8	6	6	1	1	1	5	4	4	7	5	5	6	4	4	1	1	1	7	6	6	3	3	3	0	0	0	3	3	3
ENOG_HUMAN	Gamma-enolase OS=Homo sapiens GN=ENO2 PE=1 SV=3	3.774	0.7305	0.014061	4	1	0	1	1	0	3	1	0	6	2	0	1	1	0	4	2	0	3	2	0	3	3	1	4	2	0	3	1	0	0	0	0	4	2	0	7	3	1	0	0	0	2	2	0
PRS7_HUMAN	26S protease regulatory subunit 7 OS=Homo sapiens GN=PSMC2 PE=1 SV=3	3.124	0.7181	0.001791	15	15	15	3	3	3	9	9	9	6	6	6	1	1	1	3	3	3	0	0	0	3	3	3	4	4	4	1	1	1	0	0	0	3	3	3	2	2	2	0	0	0	1	1	1
RIR1_HUMAN	Ribonucleoside-diphosphate reductase large subunit OS=Homo sapiens GN=RRM1 PE=1 SV=1	2.601	0.7175	0.079336	4	4	4	2	2	2	4	4	4	4	4	4	3	3	3	3	3	3	2	2	2	3	3	3	2	2	2	2	2	2	1	1	1	3	3	3	5	5	5	1	1	1	2	2	2
FKBP9_HUMAN	Peptidyl-prolyl cis-trans isomerase FKBP9 OS=Homo sapiens GN=FKBP9 PE=1 SV=2	1.467	0.3915	0.887008	1	1	0	0	0	0	1	1	0	0	0	0	1	1	0	0	0	0	0	0	0	1	1	0	0	0	0	0	0	0	0	0	0	0	0	0	0	0	0	0	0	0	0	0	0
GFPT2_HUMAN	Glutamine--fructose-6-phosphate aminotransferase [isomerizing] 2 OS=Homo sapiens GN=GFPT2 PE=1 SV=3	1.594	0.4348	0.031133	1	1	0	0	0	0	0	0	0	0	0	0	0	0	0	0	0	0	0	0	0	0	0	0	0	0	0	0	0	0	0	0	0	0	0	0	0	0	0	0	0	0	0	0	0
RBMX_HUMAN	RNA-binding motif protein, X chromosome OS=Homo sapiens GN=RBMX PE=1 SV=3	3.591	0.7133	0.007466	20	17	4	19	16	4	24	22	6	23	20	4	21	17	5	24	19	5	10	10	2	16	15	5	25	22	5	18	15	4	16	14	4	23	18	5	20	18	4	9	8	2	20	17	4
RAB7A_HUMAN	Ras-related protein Rab-7a OS=Homo sapiens GN=RAB7A PE=1 SV=1	3.329	0.7951	0.011849	10	8	8	1	1	1	4	4	4	3	3	3	2	2	2	4	4	4	2	2	1	2	2	2	5	4	4	3	3	2	0	0	0	0	0	0	4	4	4	2	1	1	3	3	3
LAT1_HUMAN	Large neutral amino acids transporter small subunit 1 OS=Homo sapiens GN=SLC7A5 PE=1 SV=2	3.452	0.7073	0.033234	5	4	3	2	2	2	3	2	2	3	3	2	1	1	1	3	3	3	1	1	1	1	1	1	2	2	2	2	2	2	0	0	0	0	0	0	1	1	1	1	1	1	1	1	1
TENS4_HUMAN	Tensin-4 OS=Homo sapiens GN=TNS4 PE=1 SV=3	1.175	0.2739	0.125386	0	0	0	0	0	0	0	0	0	0	0	0	0	0	0	1	1	1	0	0	0	0	0	0	1	1	1	0	0	0	0	0	0	0	0	0	0	0	0	0	0	0	0	0	0
CYC_HUMAN	Cytochrome c OS=Homo sapiens GN=CYCS PE=1 SV=2	2.446	0.6086	0.010933	2	2	2	0	0	0	2	2	2	0	0	0	0	0	0	1	1	1	0	0	0	0	0	0	1	1	1	1	1	1	1	1	1	1	1	1	0	0	0	0	0	0	0	0	0
SEP11_HUMAN	Septin-11 OS=Homo sapiens GN=SEPT11 PE=1 SV=3	2.714	0.6466	0.047272	4	4	1	0	0	0	0	0	0	1	1	1	2	2	1	2	2	1	0	0	0	1	1	0	2	2	1	0	0	0	0	0	0	1	1	0	3	3	2	0	0	0	1	1	0
PURA_HUMAN	Transcriptional activator protein Pur-alpha OS=Homo sapiens GN=PURA PE=1 SV=2	1.999	0.6004	0.023531	1	1	1	0	0	0	0	0	0	1	1	1	0	0	0	1	1	1	0	0	0	0	0	0	0	0	0	0	0	0	0	0	0	0	0	0	0	0	0	0	0	0	0	0	0
BCLF1_HUMAN	Bcl-2-associated transcription factor 1 OS=Homo sapiens GN=BCLAF1 PE=1 SV=2	2.513	0.6635	0.014159	0	0	0	0	0	0	2	2	2	1	1	1	1	1	1	3	3	3	0	0	0	1	1	1	4	4	4	2	2	2	0	0	0	4	4	4	1	1	1	1	1	1	0	0	0
IL37_HUMAN	Interleukin-37 OS=Homo sapiens GN=IL37 PE=1 SV=1	1.186	0.3187	1.21408	0	0	0	0	0	0	0	0	0	0	0	0	0	0	0	0	0	0	0	0	0	0	0	0	0	0	0	0	0	0	0	0	0	0	0	0	0	0	0	0	0	0	0	0	0
SPAST_HUMAN	Spastin OS=Homo sapiens GN=SPAST PE=1 SV=1	1.274	0.3014	0.604412	0	0	0	0	0	0	0	0	0	1	1	1	0	0	0	0	0	0	0	0	0	0	0	0	0	0	0	0	0	0	0	0	0	0	0	0	0	0	0	0	0	0	0	0	0
ADPPT_HUMAN	L-aminoadipate-semialdehyde dehydrogenase-phosphopantetheinyl transferase OS=Homo sapiens GN=AASDHPPT PE=1 SV=2	2.045	0.5941	0.048118	0	0	0	0	0	0	0	0	0	1	1	1	0	0	0	0	0	0	0	0	0	0	0	0	1	1	1	0	0	0	0	0	0	0	0	0	0	0	0	0	0	0	0	0	0
LZTS2_HUMAN	Leucine zipper putative tumor suppressor 2 OS=Homo sapiens GN=LZTS2 PE=1 SV=2	2.013	0.2215	0.345048	0	0	0	0	0	0	0	0	0	1	1	0	0	0	0	0	0	0	0	0	0	0	0	0	0	0	0	1	1	0	0	0	0	0	0	0	0	0	0	0	0	0	0	0	0
RGPD1_HUMAN	RANBP2-like and GRIP domain-containing protein 1 OS=Homo sapiens GN=RGPD1 PE=2 SV=1	1.794	0.3937	0.264243	2	2	0	0	0	0	1	1	0	2	2	0	0	0	0	0	0	0	0	0	0	0	0	0	2	1	0	0	0	0	0	0	0	1	1	0	0	0	0	0	0	0	0	0	0
RNBP6_HUMAN	Ran-binding protein 6 OS=Homo sapiens GN=RANBP6 PE=1 SV=2	1.223	0.5552	0.078882	1	1	0	0	0	0	1	1	0	0	0	0	0	0	0	0	0	0	0	0	0	0	0	0	0	0	0	0	0	0	0	0	0	0	0	0	0	0	0	0	0	0	0	0	0
RBM4_HUMAN	RNA-binding protein 4 OS=Homo sapiens GN=RBM4 PE=1 SV=1	2.301	0.59	0.014626	2	2	0	0	0	0	2	2	1	0	0	0	1	1	0	1	1	0	0	0	0	1	1	0	5	5	0	1	1	0	1	1	0	1	1	0	1	1	0	1	1	0	2	2	0
FKBP2_HUMAN	Peptidyl-prolyl cis-trans isomerase FKBP2 OS=Homo sapiens GN=FKBP2 PE=1 SV=2	1.612	0.5242	0.133277	0	0	0	0	0	0	1	1	1	0	0	0	0	0	0	1	1	1	0	0	0	0	0	0	0	0	0	0	0	0	0	0	0	0	0	0	0	0	0	0	0	0	0	0	0
XIRP2_HUMAN	Xin actin-binding repeat-containing protein 2 OS=Homo sapiens GN=XIRP2 PE=1 SV=2	1.486	0.3065	0.114705	0	0	0	0	0	0	0	0	0	1	1	1	1	1	1	1	1	1	0	0	0	0	0	0	1	1	1	0	0	0	1	1	1	0	0	0	1	1	1	0	0	0	0	0	0
1A32_HUMAN	HLA class I histocompatibility antigen, A-32 alpha chain OS=Homo sapiens GN=HLA-A PE=2 SV=2	2.621	0.7085	0.054574	2	2	0	1	1	0	2	2	0	0	0	0	0	0	0	1	1	0	0	0	0	0	0	0	0	0	0	0	0	0	0	0	0	0	0	0	1	1	0	1	1	0	0	0	0
ABCE1_HUMAN	ATP-binding cassette sub-family E member 1 OS=Homo sapiens GN=ABCE1 PE=1 SV=1	2.212	0.561	0.177503	1	1	1	0	0	0	0	0	0	1	1	1	0	0	0	2	2	2	0	0	0	0	0	0	1	1	1	0	0	0	0	0	0	0	0	0	1	1	1	0	0	0	0	0	0
PFD3_HUMAN	Prefoldin subunit 3 OS=Homo sapiens GN=VBP1 PE=1 SV=3	2.417	0.7409	0.058887	6	6	6	2	2	2	3	3	3	3	3	3	1	1	1	3	3	3	1	1	1	0	0	0	1	1	1	1	1	1	1	1	1	0	0	0	4	4	4	1	1	1	1	1	1
ENAH_HUMAN	Protein enabled homolog OS=Homo sapiens GN=ENAH PE=1 SV=2	2.05	0.6161	0.059442	2	2	2	0	0	0	0	0	0	1	1	1	0	0	0	2	2	2	0	0	0	2	2	2	1	1	1	0	0	0	0	0	0	0	0	0	0	0	0	0	0	0	0	0	0
DNJB3_HUMAN	DnaJ homolog subfamily B member 3 OS=Homo sapiens GN=DNAJB3 PE=1 SV=1	2.048	0.6177	0.624596	0	0	0	0	0	0	1	1	0	0	0	0	0	0	0	0	0	0	0	0	0	0	0	0	0	0	0	0	0	0	0	0	0	0	0	0	0	0	0	0	0	0	0	0	0
RL34_HUMAN	60S ribosomal protein L34 OS=Homo sapiens GN=RPL34 PE=1 SV=3	2.036	0.6204	0.010406	1	1	1	0	0	0	1	1	1	1	1	1	1	1	1	2	2	2	1	1	1	3	3	3	2	2	2	3	3	3	0	0	0	2	2	2	2	2	2	0	0	0	1	1	1
CS043_HUMAN	Uncharacterized protein C19orf43 OS=Homo sapiens GN=C19orf43 PE=1 SV=1	1.143	0.5179	0.030732	0	0	0	0	0	0	0	0	0	0	0	0	0	0	0	0	0	0	0	0	0	0	0	0	1	1	1	0	0	0	0	0	0	0	0	0	0	0	0	0	0	0	0	0	0
AURKA_HUMAN	Aurora kinase A OS=Homo sapiens GN=AURKA PE=1 SV=2	1.911	0.5334	0.350341	0	0	0	1	1	1	2	2	1	0	0	0	0	0	0	0	0	0	0	0	0	0	0	0	2	2	1	1	1	1	0	0	0	1	1	0	1	1	1	0	0	0	0	0	0
RT22_HUMAN	28S ribosomal protein S22, mitochondrial OS=Homo sapiens GN=MRPS22 PE=1 SV=1	2.162	0.6281	0.095345	1	1	1	0	0	0	0	0	0	0	0	0	0	0	0	0	0	0	0	0	0	0	0	0	0	0	0	0	0	0	0	0	0	0	0	0	0	0	0	0	0	0	0	0	0
BAG2_HUMAN	BAG family molecular chaperone regulator 2 OS=Homo sapiens GN=BAG2 PE=1 SV=1	2.431	0.618	0.01183	8	8	8	5	5	5	8	8	8	3	3	3	1	1	1	0	0	0	2	2	2	3	3	3	5	5	5	3	3	3	2	2	2	1	1	1	1	1	1	1	1	1	2	2	2
ZYX_HUMAN	Zyxin OS=Homo sapiens GN=ZYX PE=1 SV=1	2.912	0.6849	0.089842	0	0	0	0	0	0	1	1	1	2	2	2	0	0	0	1	1	1	0	0	0	1	1	1	1	1	1	0	0	0	0	0	0	2	2	2	2	2	2	0	0	0	0	0	0
ZCCHV_HUMAN	Zinc finger CCCH-type antiviral protein 1 OS=Homo sapiens GN=ZC3HAV1 PE=1 SV=3	2.577	0.7586	0.051997	2	2	2	1	1	1	3	3	3	3	3	3	1	1	1	0	0	0	0	0	0	0	0	0	4	4	4	1	1	1	0	0	0	1	1	1	0	0	0	0	0	0	1	1	1
TF2AY_HUMAN	TFIIA-alpha and beta-like factor OS=Homo sapiens GN=GTF2A1L PE=2 SV=2	1.314	0.2306	1.43984	0	0	0	0	0	0	1	1	1	0	0	0	1	1	1	0	0	0	0	0	0	0	0	0	0	0	0	0	0	0	0	0	0	0	0	0	0	0	0	0	0	0	0	0	0
TCP4_HUMAN	Activated RNA polymerase II transcriptional coactivator p15 OS=Homo sapiens GN=SUB1 PE=1 SV=3	2.4	0.6754	0.010503	2	2	2	1	1	1	1	1	1	5	4	4	1	1	1	5	4	4	1	1	1	2	2	2	4	4	4	3	2	2	1	1	1	2	2	2	4	3	3	1	1	1	2	2	2
GPX4_HUMAN	Phospholipid hydroperoxide glutathione peroxidase, mitochondrial OS=Homo sapiens GN=GPX4 PE=1 SV=3	1.246	0.3989	0.070655	0	0	0	0	0	0	0	0	0	1	1	1	0	0	0	0	0	0	0	0	0	0	0	0	0	0	0	0	0	0	0	0	0	0	0	0	0	0	0	0	0	0	0	0	0
NICA_HUMAN	Nicastrin OS=Homo sapiens GN=NCSTN PE=1 SV=2	1.499	0.4276	0.847188	0	0	0	0	0	0	0	0	0	0	0	0	0	0	0	1	1	1	0	0	0	0	0	0	0	0	0	0	0	0	0	0	0	0	0	0	0	0	0	0	0	0	0	0	0
K1C40_HUMAN	Keratin, type I cytoskeletal 40 OS=Homo sapiens GN=KRT40 PE=1 SV=2	1.732	0.2906	0.465471	0	0	0	0	0	0	1	1	0	0	0	0	0	0	0	0	0	0	0	0	0	0	0	0	0	0	0	0	0	0	0	0	0	0	0	0	0	0	0	0	0	0	0	0	0
AIFM1_HUMAN	Apoptosis-inducing factor 1, mitochondrial OS=Homo sapiens GN=AIFM1 PE=1 SV=1	2.42	0.6811	0.043035	0	0	0	2	2	2	2	2	2	2	2	2	1	1	1	3	3	3	0	0	0	1	1	1	4	4	4	1	1	1	0	0	0	2	2	2	3	3	3	0	0	0	1	1	1
ECHA_HUMAN	Trifunctional enzyme subunit alpha, mitochondrial OS=Homo sapiens GN=HADHA PE=1 SV=2	2.665	0.6807	0.008836	10	10	10	6	6	6	7	7	7	7	7	7	5	5	5	9	9	9	2	2	2	3	3	3	10	10	10	7	7	7	4	4	4	8	8	8	9	9	9	3	3	3	7	7	7
LX12B_HUMAN	Arachidonate 12-lipoxygenase, 12R-type OS=Homo sapiens GN=ALOX12B PE=1 SV=1	2.177	0.6159	0.474504	0	0	0	0	0	0	0	0	0	0	0	0	0	0	0	0	0	0	0	0	0	0	0	0	0	0	0	0	0	0	0	0	0	0	0	0	0	0	0	0	0	0	0	0	0
MDHM_HUMAN	Malate dehydrogenase, mitochondrial OS=Homo sapiens GN=MDH2 PE=1 SV=3	3.85	0.7687	0.048698	4	4	4	4	4	4	6	6	6	5	5	5	4	4	4	6	6	6	2	2	2	4	4	4	5	5	5	4	4	4	2	2	2	4	4	4	7	7	7	0	0	0	3	3	3
HV304_HUMAN	Ig heavy chain V-III region TIL OS=Homo sapiens PE=1 SV=1	1.928	0.3422	0.00165	0	0	0	0	0	0	0	0	0	0	0	0	1	1	0	0	0	0	0	0	0	0	0	0	0	0	0	0	0	0	0	0	0	1	1	0	0	0	0	0	0	0	0	0	0
SYSC_HUMAN	Serine--tRNA ligase, cytoplasmic OS=Homo sapiens GN=SARS PE=1 SV=3	1.305	0.3247	0.309984	1	1	1	0	0	0	1	1	1	2	2	2	0	0	0	1	1	1	0	0	0	0	0	0	0	0	0	0	0	0	0	0	0	0	0	0	0	0	0	0	0	0	0	0	0
SRRT_HUMAN	Serrate RNA effector molecule homolog OS=Homo sapiens GN=SRRT PE=1 SV=1	2.418	0.6904	0.004194	4	4	4	2	2	2	3	3	3	6	6	6	1	1	1	8	8	8	1	1	1	3	3	3	7	7	7	3	3	3	0	0	0	5	5	5	4	4	4	0	0	0	3	3	3
CYTB_HUMAN	Cystatin-B OS=Homo sapiens GN=CSTB PE=1 SV=2	3.303	0.6818	0.043274	4	4	4	1	1	1	1	1	1	3	3	3	0	0	0	1	1	1	0	0	0	0	0	0	1	1	1	0	0	0	0	0	0	0	0	0	2	2	2	0	0	0	1	1	1
LAS1L_HUMAN	Ribosomal biogenesis protein LAS1L OS=Homo sapiens GN=LAS1L PE=1 SV=2	1.285	0.6551	0.396937	2	2	2	0	0	0	1	1	1	0	0	0	0	0	0	0	0	0	0	0	0	0	0	0	0	0	0	0	0	0	0	0	0	0	0	0	0	0	0	0	0	0	0	0	0
CSK2B_HUMAN	Casein kinase II subunit beta OS=Homo sapiens GN=CSNK2B PE=1 SV=1	2.186	0.511	0.320284	2	2	2	0	0	0	2	1	1	1	1	1	0	0	0	1	1	1	0	0	0	0	0	0	1	1	1	0	0	0	0	0	0	1	1	1	0	0	0	0	0	0	0	0	0
DYR_HUMAN	Dihydrofolate reductase OS=Homo sapiens GN=DHFR PE=1 SV=2	1.76	0.5733	0.087441	0	0	0	0	0	0	0	0	0	0	0	0	0	0	0	1	1	0	0	0	0	0	0	0	1	1	0	0	0	0	0	0	0	0	0	0	0	0	0	0	0	0	0	0	0
SIAH2_HUMAN	E3 ubiquitin-protein ligase SIAH2 OS=Homo sapiens GN=SIAH2 PE=1 SV=1	1.96	0.4929	0.100534	0	0	0	1	1	0	1	1	0	0	0	0	1	1	0	0	0	0	0	0	0	1	1	0	0	0	0	1	1	0	0	0	0	0	0	0	1	1	0	0	0	0	1	1	0
CPNE5_HUMAN	Copine-5 OS=Homo sapiens GN=CPNE5 PE=1 SV=2	1.819	0.4959	0.505419	1	1	0	0	0	0	0	0	0	0	0	0	0	0	0	0	0	0	0	0	0	0	0	0	0	0	0	0	0	0	0	0	0	0	0	0	0	0	0	0	0	0	0	0	0
UBP7_HUMAN	Ubiquitin carboxyl-terminal hydrolase 7 OS=Homo sapiens GN=USP7 PE=1 SV=2	2.483	0.5776	0.043889	1	1	1	0	0	0	3	3	3	2	2	2	1	1	1	1	1	1	0	0	0	0	0	0	3	3	3	0	0	0	1	1	1	0	0	0	1	1	1	1	1	1	0	0	0
PSA4_HUMAN	Proteasome subunit alpha type-4 OS=Homo sapiens GN=PSMA4 PE=1 SV=1	3.69	0.6571	0.006332	6	6	6	4	4	4	5	5	5	5	4	4	3	3	3	5	5	5	1	1	1	2	2	2	4	4	4	1	1	1	1	1	1	2	2	2	4	4	4	0	0	0	2	2	2
MYH11_HUMAN	Myosin-11 OS=Homo sapiens GN=MYH11 PE=1 SV=3	3.888	0.795	0.002874	9	8	0	4	4	0	7	7	0	7	7	0	4	4	0	8	8	0	3	3	0	4	4	0	6	6	0	5	5	0	3	3	0	4	4	0	4	4	0	3	3	0	4	4	0
TPM2_HUMAN	Tropomyosin beta chain OS=Homo sapiens GN=TPM2 PE=1 SV=1	3.041	0.6364	0.02282	10	9	1	1	1	0	4	4	1	8	7	0	5	5	0	6	6	0	4	4	0	2	2	0	6	6	0	3	3	1	3	3	0	7	7	0	12	10	2	2	2	0	5	5	0
STMN3_HUMAN	Stathmin-3 OS=Homo sapiens GN=STMN3 PE=1 SV=3	1.833	0.2286	0.175409	1	1	0	0	0	0	0	0	0	1	1	0	0	0	0	1	1	0	0	0	0	0	0	0	0	0	0	1	1	0	0	0	0	1	1	0	0	0	0	0	0	0	1	1	0
UBP11_HUMAN	Ubiquitin carboxyl-terminal hydrolase 11 OS=Homo sapiens GN=USP11 PE=1 SV=3	1.115	0.4224	0.162171	0	0	0	0	0	0	0	0	0	0	0	0	0	0	0	0	0	0	0	0	0	0	0	0	1	1	1	0	0	0	0	0	0	0	0	0	0	0	0	0	0	0	0	0	0
KAD1_HUMAN	Adenylate kinase isoenzyme 1 OS=Homo sapiens GN=AK1 PE=1 SV=3	1.938	0.6507	0.102851	1	1	1	0	0	0	1	1	1	2	2	2	0	0	0	3	3	3	0	0	0	0	0	0	2	2	2	0	0	0	0	0	0	1	1	1	1	1	1	0	0	0	1	1	1
LMNA_HUMAN	Prelamin-A/C OS=Homo sapiens GN=LMNA PE=1 SV=1	4.021	0.7851	0.003229	46	35	34	37	30	28	53	39	37	41	34	33	35	30	29	48	37	35	28	18	17	31	22	21	47	36	35	37	26	25	25	23	22	44	33	32	43	30	29	22	17	16	31	23	22
TMUB2_HUMAN	Transmembrane and ubiquitin-like domain-containing protein 2 OS=Homo sapiens GN=TMUB2 PE=2 SV=2	1.063	0.2672	1.57504	1	1	0	0	0	0	0	0	0	0	0	0	0	0	0	0	0	0	0	0	0	0	0	0	0	0	0	0	0	0	0	0	0	0	0	0	0	0	0	0	0	0	0	0	0
PUR2_HUMAN	Trifunctional purine biosynthetic protein adenosine-3 OS=Homo sapiens GN=GART PE=1 SV=1	2.415	0.6474	0.056116	6	6	6	2	2	2	7	7	7	7	7	7	2	2	2	3	3	3	0	0	0	2	2	2	3	3	3	3	3	3	0	0	0	2	2	2	4	4	4	0	0	0	1	1	1
MBNL3_HUMAN	Muscleblind-like protein 3 OS=Homo sapiens GN=MBNL3 PE=2 SV=2	1.556	0.2924	0.632525	0	0	0	0	0	0	0	0	0	0	0	0	0	0	0	0	0	0	0	0	0	0	0	0	1	1	0	0	0	0	0	0	0	0	0	0	0	0	0	0	0	0	0	0	0
PEBP1_HUMAN	Phosphatidylethanolamine-binding protein 1 OS=Homo sapiens GN=PEBP1 PE=1 SV=3	3.024	0.78	0.015544	5	5	5	1	1	1	6	5	5	4	4	4	2	2	2	5	5	5	1	1	1	2	2	2	4	4	4	2	2	2	2	2	2	2	2	2	5	3	3	2	2	2	1	1	1
NCOA5_HUMAN	Nuclear receptor coactivator 5 OS=Homo sapiens GN=NCOA5 PE=1 SV=2	1.134	0.216	0.752972	0	0	0	0	0	0	0	0	0	0	0	0	0	0	0	0	0	0	0	0	0	0	0	0	0	0	0	0	0	0	0	0	0	0	0	0	1	1	1	0	0	0	0	0	0
UCK2_HUMAN	Uridine-cytidine kinase 2 OS=Homo sapiens GN=UCK2 PE=1 SV=1	1.949	0.6072	0.130349	1	1	0	0	0	0	0	0	0	1	1	0	0	0	0	1	1	0	0	0	0	0	0	0	2	2	1	0	0	0	0	0	0	0	0	0	2	2	1	0	0	0	0	0	0
APEX1_HUMAN	DNA-(apurinic or apyrimidinic site) lyase OS=Homo sapiens GN=APEX1 PE=1 SV=2	3.275	0.7594	0.050156	3	3	3	1	1	1	2	2	2	6	6	6	2	2	2	3	3	3	2	2	2	2	2	2	4	4	4	3	3	3	2	2	2	2	2	2	4	4	4	2	2	2	2	2	2
GWL_HUMAN	Serine/threonine-protein kinase greatwall OS=Homo sapiens GN=MASTL PE=1 SV=1	1.922	0.4043	0.237803	1	1	0	0	0	0	0	0	0	0	0	0	0	0	0	0	0	0	0	0	0	0	0	0	0	0	0	0	0	0	0	0	0	0	0	0	1	1	0	0	0	0	0	0	0
SYWC_HUMAN	Tryptophan--tRNA ligase, cytoplasmic OS=Homo sapiens GN=WARS PE=1 SV=2	1.953	0.6068	0.021984	1	1	1	1	1	1	0	0	0	1	1	1	0	0	0	1	1	1	0	0	0	0	0	0	0	0	0	0	0	0	0	0	0	0	0	0	0	0	0	0	0	0	1	1	1
TMM43_HUMAN	Transmembrane protein 43 OS=Homo sapiens GN=TMEM43 PE=1 SV=1	1.832	0.6101	0.05183	2	2	2	0	0	0	0	0	0	2	2	2	0	0	0	0	0	0	0	0	0	0	0	0	0	0	0	0	0	0	0	0	0	0	0	0	2	2	2	0	0	0	1	1	1
DC1L2_HUMAN	Cytoplasmic dynein 1 light intermediate chain 2 OS=Homo sapiens GN=DYNC1LI2 PE=1 SV=1	1.45	0.3345	0.852507	0	0	0	0	0	0	1	1	1	0	0	0	0	0	0	0	0	0	0	0	0	0	0	0	0	0	0	0	0	0	0	0	0	0	0	0	0	0	0	0	0	0	0	0	0
AKAP8_HUMAN	A-kinase anchor protein 8 OS=Homo sapiens GN=AKAP8 PE=1 SV=1	2.107	0.5624	0.230595	0	0	0	0	0	0	0	0	0	1	1	1	0	0	0	0	0	0	0	0	0	0	0	0	1	1	1	0	0	0	0	0	0	0	0	0	0	0	0	0	0	0	0	0	0
STRBP_HUMAN	Spermatid perinuclear RNA-binding protein OS=Homo sapiens GN=STRBP PE=1 SV=1	2.775	0.7455	0.080687	2	2	1	0	0	0	2	2	0	3	3	1	0	0	0	3	3	0	0	0	0	1	1	0	2	1	0	0	0	0	0	0	0	4	3	1	2	2	1	0	0	0	1	1	0
PTBP1_HUMAN	Polypyrimidine tract-binding protein 1 OS=Homo sapiens GN=PTBP1 PE=1 SV=1	2.473	0.6652	0.017038	9	8	5	4	4	3	10	9	6	9	7	4	2	2	1	8	6	4	1	1	0	3	3	2	5	4	2	2	2	1	2	2	1	4	4	1	4	3	2	2	2	1	3	3	2
CPSF2_HUMAN	Cleavage and polyadenylation specificity factor subunit 2 OS=Homo sapiens GN=CPSF2 PE=1 SV=2	1.141	0.2691	0.488513	1	1	1	0	0	0	0	0	0	0	0	0	0	0	0	0	0	0	0	0	0	0	0	0	0	0	0	0	0	0	0	0	0	0	0	0	0	0	0	0	0	0	0	0	0
GCN1L_HUMAN	Translational activator GCN1 OS=Homo sapiens GN=GCN1L1 PE=1 SV=6	2.223	0.5659	0.016215	4	4	4	0	0	0	1	1	1	5	5	5	0	0	0	0	0	0	0	0	0	0	0	0	2	2	2	0	0	0	0	0	0	0	0	0	0	0	0	0	0	0	0	0	0
FKB1A_HUMAN	Peptidyl-prolyl cis-trans isomerase FKBP1A OS=Homo sapiens GN=FKBP1A PE=1 SV=2	1.943	0.6773	0.098328	1	1	1	0	0	0	1	1	1	1	1	1	0	0	0	0	0	0	0	0	0	0	0	0	0	0	0	0	0	0	0	0	0	0	0	0	0	0	0	0	0	0	0	0	0
AP2D_HUMAN	Transcription factor AP-2-delta OS=Homo sapiens GN=TFAP2D PE=2 SV=1	1.486	0.3331	0.541674	0	0	0	0	0	0	0	0	0	1	1	1	0	0	0	0	0	0	0	0	0	0	0	0	1	1	1	0	0	0	0	0	0	0	0	0	0	0	0	0	0	0	0	0	0
SRSF4_HUMAN	Serine/arginine-rich splicing factor 4 OS=Homo sapiens GN=SRSF4 PE=1 SV=2	3.008	0.7428	0.014186	3	2	0	2	2	0	3	3	0	4	3	0	2	2	0	4	3	0	0	0	0	2	2	0	3	3	0	3	3	0	2	2	0	3	3	0	4	3	0	2	2	0	3	3	0
CPNE1_HUMAN	Copine-1 OS=Homo sapiens GN=CPNE1 PE=1 SV=1	2.497	0.5728	0.034688	4	4	4	1	1	1	4	4	4	4	4	4	1	1	1	4	4	4	0	0	0	0	0	0	4	4	4	2	2	2	1	1	1	4	4	4	4	4	4	1	1	1	1	1	1
HEXB_HUMAN	Beta-hexosaminidase subunit beta OS=Homo sapiens GN=HEXB PE=1 SV=3	1.486	0.5	0.739641	0	0	0	0	0	0	0	0	0	0	0	0	0	0	0	0	0	0	0	0	0	0	0	0	1	1	1	0	0	0	0	0	0	0	0	0	0	0	0	0	0	0	0	0	0
DHSA_HUMAN	Succinate dehydrogenase [ubiquinone] flavoprotein subunit, mitochondrial OS=Homo sapiens GN=SDHA PE=1 SV=2	3.792	0.7316	0.016792	6	6	6	3	3	3	4	4	4	5	5	5	1	1	1	3	3	3	1	1	1	1	1	1	3	3	3	1	1	1	1	1	1	3	3	3	5	5	5	1	1	1	1	1	1
MYH7B_HUMAN	Myosin-7B OS=Homo sapiens GN=MYH7B PE=2 SV=3	1.991	0.3014	0.224977	0	0	0	0	0	0	0	0	0	0	0	0	0	0	0	0	0	0	1	1	0	0	0	0	0	0	0	0	0	0	0	0	0	0	0	0	0	0	0	0	0	0	0	0	0
ENOB_HUMAN	Beta-enolase OS=Homo sapiens GN=ENO3 PE=1 SV=5	3.774	0.7305	0.014061	4	1	0	1	1	0	3	1	0	6	2	0	1	1	0	4	2	0	3	2	0	2	2	0	4	2	0	3	1	0	0	0	0	4	2	0	6	2	0	0	0	0	2	2	0
ATP5L_HUMAN	ATP synthase subunit g, mitochondrial OS=Homo sapiens GN=ATP5L PE=1 SV=3	1.638	0.4249	0.29036	0	0	0	0	0	0	0	0	0	0	0	0	0	0	0	1	1	1	0	0	0	0	0	0	0	0	0	0	0	0	0	0	0	0	0	0	0	0	0	0	0	0	0	0	0
GSTP1_HUMAN	Glutathione S-transferase P OS=Homo sapiens GN=GSTP1 PE=1 SV=2	2.817	0.722	0.007153	6	5	5	0	0	0	4	4	4	1	1	1	1	1	1	3	3	3	0	0	0	1	1	1	1	1	1	1	1	1	0	0	0	1	1	1	2	2	2	0	0	0	1	1	1
CE058_HUMAN	Putative uncharacterized protein C5orf58 OS=Homo sapiens GN=C5orf58 PE=4 SV=1	1.072	0.2144	0.310529	0	0	0	0	0	0	0	0	0	0	0	0	0	0	0	1	1	1	1	1	1	0	0	0	0	0	0	0	0	0	0	0	0	0	0	0	0	0	0	0	0	0	0	0	0
RTN4_HUMAN	Reticulon-4 OS=Homo sapiens GN=RTN4 PE=1 SV=2	3.949	0.7019	0.005803	6	5	5	0	0	0	4	3	3	2	2	2	1	1	1	3	2	2	0	0	0	1	1	1	2	2	2	1	1	1	0	0	0	2	2	2	5	4	4	0	0	0	3	2	2
FLNB_HUMAN	Filamin-B OS=Homo sapiens GN=FLNB PE=1 SV=2	3.839	0.7965	0.001774	59	54	44	32	31	26	71	65	59	48	44	35	32	29	23	58	53	44	14	14	10	26	25	21	38	36	28	32	28	23	22	22	19	43	39	33	35	31	23	23	23	20	31	29	24
WDR1_HUMAN	WD repeat-containing protein 1 OS=Homo sapiens GN=WDR1 PE=1 SV=4	2.474	0.6802	0.045948	4	4	4	0	0	0	7	7	7	3	3	3	3	3	3	7	7	7	2	2	2	4	4	4	4	4	4	4	4	4	3	3	3	3	3	3	2	2	2	3	3	3	5	5	5
MYH4_HUMAN	Myosin-4 OS=Homo sapiens GN=MYH4 PE=1 SV=2	1.991	0.5563	0.009379	0	0	0	0	0	0	0	0	0	0	0	0	0	0	0	0	0	0	3	3	1	0	0	0	0	0	0	0	0	0	0	0	0	0	0	0	0	0	0	0	0	0	0	0	0
EIF3C_HUMAN	Eukaryotic translation initiation factor 3 subunit C OS=Homo sapiens GN=EIF3C PE=1 SV=1	2.719	0.7184	0.006528	6	6	6	2	2	2	8	8	8	4	4	4	2	2	2	7	7	7	1	1	1	3	3	3	5	5	5	2	2	2	1	1	1	4	4	4	4	4	4	2	2	2	2	2	2
PAXI_HUMAN	Paxillin OS=Homo sapiens GN=PXN PE=1 SV=3	2.158	0.5018	0.255232	0	0	0	1	1	1	1	1	1	0	0	0	1	1	1	0	0	0	1	1	1	0	0	0	1	1	1	0	0	0	0	0	0	0	0	0	1	1	1	0	0	0	1	1	1
MAP1A_HUMAN	Microtubule-associated protein 1A OS=Homo sapiens GN=MAP1A PE=1 SV=6	1.996	0.4033	0.639103	1	1	0	0	0	0	1	1	0	0	0	0	0	0	0	0	0	0	0	0	0	0	0	0	0	0	0	0	0	0	0	0	0	0	0	0	0	0	0	0	0	0	0	0	0
LIMS1_HUMAN	LIM and senescent cell antigen-like-containing domain protein 1 OS=Homo sapiens GN=LIMS1 PE=1 SV=4	1.197	0.2846	0.045526	1	1	1	0	0	0	0	0	0	0	0	0	0	0	0	0	0	0	0	0	0	0	0	0	0	0	0	0	0	0	0	0	0	0	0	0	1	1	0	0	0	0	0	0	0
RL8_HUMAN	60S ribosomal protein L8 OS=Homo sapiens GN=RPL8 PE=1 SV=2	3.781	0.7115	0.027513	3	3	3	2	2	2	2	2	2	4	3	3	1	1	1	2	2	2	0	0	0	2	2	2	5	4	4	3	3	3	1	1	1	4	4	4	4	4	4	0	0	0	0	0	0
ODPA_HUMAN	Pyruvate dehydrogenase E1 component subunit alpha, somatic form, mitochondrial OS=Homo sapiens GN=PDHA1 PE=1 SV=3	2.334	0.6092	0.012512	4	4	4	1	1	1	2	2	1	2	2	1	0	0	0	2	2	2	0	0	0	0	0	0	3	3	3	2	2	2	0	0	0	2	2	2	0	0	0	1	1	1	0	0	0
MLEC_HUMAN	Malectin OS=Homo sapiens GN=MLEC PE=1 SV=1	1.858	0.6006	0.024247	1	1	1	0	0	0	0	0	0	1	1	1	0	0	0	0	0	0	0	0	0	0	0	0	0	0	0	0	0	0	0	0	0	0	0	0	0	0	0	0	0	0	0	0	0
CYFP1_HUMAN	Cytoplasmic FMR1-interacting protein 1 OS=Homo sapiens GN=CYFIP1 PE=1 SV=1	1.651	0.5724	0.35013	1	1	0	0	0	0	0	0	0	0	0	0	0	0	0	2	2	1	0	0	0	0	0	0	0	0	0	0	0	0	0	0	0	0	0	0	0	0	0	0	0	0	0	0	0
NUFP2_HUMAN	Nuclear fragile X mental retardation-interacting protein 2 OS=Homo sapiens GN=NUFIP2 PE=1 SV=1	3.253	0.7405	0.384932	1	1	1	0	0	0	3	3	3	1	1	1	0	0	0	3	3	3	0	0	0	0	0	0	2	2	2	1	1	1	1	1	1	0	0	0	1	1	1	1	1	1	0	0	0
UBC9_HUMAN	SUMO-conjugating enzyme UBC9 OS=Homo sapiens GN=UBE2I PE=1 SV=1	2.099	0.5605	0.06969	3	3	3	0	0	0	1	1	1	0	0	0	0	0	0	0	0	0	0	0	0	0	0	0	0	0	0	0	0	0	0	0	0	0	0	0	0	0	0	0	0	0	0	0	0
RAB6A_HUMAN	Ras-related protein Rab-6A OS=Homo sapiens GN=RAB6A PE=1 SV=3	2.279	0.584	0.068066	4	3	2	1	1	0	2	2	0	2	2	1	0	0	0	2	2	0	0	0	0	0	0	0	1	1	0	0	0	0	0	0	0	1	1	0	2	2	0	0	0	0	0	0	0
GBRL1_HUMAN	Gamma-aminobutyric acid receptor-associated protein-like 1 OS=Homo sapiens GN=GABARAPL1 PE=1 SV=1	1.722	0.1243	1.03048	0	0	0	0	0	0	0	0	0	0	0	0	0	0	0	0	0	0	0	0	0	0	0	0	0	0	0	0	0	0	0	0	0	0	0	0	0	0	0	0	0	0	0	0	0
PGTB2_HUMAN	Geranylgeranyl transferase type-2 subunit beta OS=Homo sapiens GN=RABGGTB PE=1 SV=2	1.717	0.417	0.066892	1	1	1	0	0	0	0	0	0	0	0	0	0	0	0	0	0	0	0	0	0	0	0	0	0	0	0	0	0	0	0	0	0	0	0	0	1	1	1	0	0	0	0	0	0
AT5G1_HUMAN	ATP synthase lipid-binding protein, mitochondrial OS=Homo sapiens GN=ATP5G1 PE=2 SV=2	1.409	0.2789	0.695935	0	0	0	0	0	0	0	0	0	0	0	0	0	0	0	0	0	0	0	0	0	0	0	0	0	0	0	0	0	0	0	0	0	0	0	0	1	1	0	0	0	0	0	0	0
RLA2_HUMAN	60S acidic ribosomal protein P2 OS=Homo sapiens GN=RPLP2 PE=1 SV=1	2.865	0.7005	0.101553	3	3	3	2	2	2	1	1	1	1	1	1	0	0	0	2	2	2	0	0	0	1	1	1	2	2	2	1	1	1	1	1	1	1	1	1	0	0	0	1	1	1	1	1	1
ERGI1_HUMAN	Endoplasmic reticulum-Golgi intermediate compartment protein 1 OS=Homo sapiens GN=ERGIC1 PE=1 SV=1	1.678	0.5614	0.043834	0	0	0	0	0	0	1	1	1	0	0	0	0	0	0	1	1	1	0	0	0	0	0	0	0	0	0	0	0	0	0	0	0	0	0	0	0	0	0	0	0	0	0	0	0
PDCD5_HUMAN	Programmed cell death protein 5 OS=Homo sapiens GN=PDCD5 PE=1 SV=3	2.866	0.7833	0.002554	1	1	1	0	0	0	0	0	0	1	1	1	0	0	0	0	0	0	0	0	0	0	0	0	0	0	0	1	1	1	0	0	0	0	0	0	3	3	3	1	1	1	0	0	0
CPNE9_HUMAN	Copine-9 OS=Homo sapiens GN=CPNE9 PE=1 SV=3	1.819	0.4959	0.505419	1	1	0	0	0	0	0	0	0	0	0	0	0	0	0	0	0	0	0	0	0	0	0	0	0	0	0	0	0	0	0	0	0	0	0	0	0	0	0	0	0	0	0	0	0
SORCN_HUMAN	Sorcin OS=Homo sapiens GN=SRI PE=1 SV=1	1.41	0.3638	0.061527	1	1	1	0	0	0	0	0	0	0	0	0	0	0	0	0	0	0	0	0	0	0	0	0	0	0	0	0	0	0	0	0	0	0	0	0	1	1	1	0	0	0	0	0	0
SYFA_HUMAN	Phenylalanine--tRNA ligase alpha subunit OS=Homo sapiens GN=FARSA PE=1 SV=3	2.345	0.6709	0.058506	4	4	4	0	0	0	0	0	0	2	2	2	0	0	0	2	2	2	0	0	0	1	1	1	1	1	1	0	0	0	0	0	0	1	1	1	2	2	2	0	0	0	0	0	0
TKTL2_HUMAN	Transketolase-like protein 2 OS=Homo sapiens GN=TKTL2 PE=1 SV=1	1.459	0.27	0.192662	1	1	1	0	0	0	0	0	0	2	1	1	0	0	0	1	1	1	0	0	0	0	0	0	1	1	1	0	0	0	0	0	0	0	0	0	0	0	0	0	0	0	1	1	1
CH10_HUMAN	10 kDa heat shock protein, mitochondrial OS=Homo sapiens GN=HSPE1 PE=1 SV=2	2.801	0.6787	0.002434	7	6	6	3	3	3	3	3	3	8	6	6	6	5	5	7	6	6	1	1	1	3	3	3	6	5	5	5	4	4	4	4	4	3	3	3	6	4	4	3	3	3	6	5	5
MP2K6_HUMAN	Dual specificity mitogen-activated protein kinase kinase 6 OS=Homo sapiens GN=MAP2K6 PE=1 SV=1	1.489	0.5473	0.25324	0	0	0	0	0	0	1	1	0	0	0	0	1	1	0	0	0	0	0	0	0	0	0	0	1	1	0	1	1	0	0	0	0	2	2	0	0	0	0	0	0	0	0	0	0
STK24_HUMAN	Serine/threonine-protein kinase 24 OS=Homo sapiens GN=STK24 PE=1 SV=1	1.379	0.1972	0.534652	0	0	0	0	0	0	0	0	0	0	0	0	0	0	0	0	0	0	0	0	0	0	0	0	0	0	0	0	0	0	0	0	0	0	0	0	0	0	0	0	0	0	0	0	0
PGM2_HUMAN	Phosphoglucomutase-2 OS=Homo sapiens GN=PGM2 PE=1 SV=4	2.02	0.645	0.073102	2	2	2	0	0	0	0	0	0	2	2	2	0	0	0	3	3	2	0	0	0	0	0	0	0	0	0	0	0	0	0	0	0	0	0	0	2	2	2	0	0	0	0	0	0
DC1I2_HUMAN	Cytoplasmic dynein 1 intermediate chain 2 OS=Homo sapiens GN=DYNC1I2 PE=1 SV=3	2.872	0.7149	0.026711	5	5	5	0	0	0	2	2	2	4	4	4	3	3	3	3	3	3	4	4	4	2	2	2	3	3	3	4	4	4	3	3	3	3	3	3	4	4	4	1	1	1	3	3	3
CHD4_HUMAN	Chromodomain-helicase-DNA-binding protein 4 OS=Homo sapiens GN=CHD4 PE=1 SV=2	3.252	0.6411	0.446918	2	2	1	1	1	0	1	1	0	2	2	2	0	0	0	2	2	2	0	0	0	0	0	0	1	1	1	0	0	0	0	0	0	0	0	0	0	0	0	0	0	0	0	0	0
AMOT_HUMAN	Angiomotin OS=Homo sapiens GN=AMOT PE=1 SV=1	1.107	0.196	0.50756	0	0	0	0	0	0	0	0	0	0	0	0	0	0	0	0	0	0	0	0	0	1	1	0	0	0	0	0	0	0	0	0	0	0	0	0	0	0	0	0	0	0	0	0	0
ACON_HUMAN	Aconitate hydratase, mitochondrial OS=Homo sapiens GN=ACO2 PE=1 SV=2	3.258	0.6412	0.154822	4	4	4	0	0	0	0	0	0	1	1	1	0	0	0	3	3	3	0	0	0	0	0	0	1	1	1	0	0	0	0	0	0	0	0	0	1	1	1	0	0	0	1	1	1
DLGP5_HUMAN	Disks large-associated protein 5 OS=Homo sapiens GN=DLGAP5 PE=1 SV=2	1.563	0.5157	0.393331	0	0	0	0	0	0	0	0	0	0	0	0	0	0	0	0	0	0	0	0	0	0	0	0	1	1	1	0	0	0	0	0	0	0	0	0	0	0	0	0	0	0	0	0	0
FIP1_HUMAN	Pre-mRNA 3'-end-processing factor FIP1 OS=Homo sapiens GN=FIP1L1 PE=1 SV=1	2.387	0.4857	0.136647	0	0	0	0	0	0	0	0	0	1	1	1	0	0	0	1	1	1	0	0	0	0	0	0	0	0	0	0	0	0	0	0	0	0	0	0	0	0	0	0	0	0	0	0	0
OTU7B_HUMAN	OTU domain-containing protein 7B OS=Homo sapiens GN=OTUD7B PE=1 SV=1	1.226	0.2708	0.015373	0	0	0	0	0	0	0	0	0	1	1	1	0	0	0	1	1	1	0	0	0	1	1	1	0	0	0	1	1	1	0	0	0	0	0	0	0	0	0	0	0	0	0	0	0
RFC2_HUMAN	Replication factor C subunit 2 OS=Homo sapiens GN=RFC2 PE=1 SV=3	2.464	0.6	0.00522	1	1	1	1	1	1	2	2	2	2	2	2	0	0	0	2	2	2	0	0	0	0	0	0	1	1	1	0	0	0	0	0	0	1	1	1	2	2	2	0	0	0	0	0	0
CD63_HUMAN	CD63 antigen OS=Homo sapiens GN=CD63 PE=1 SV=2	1.658	0.4125	0.111423	1	1	1	0	0	0	0	0	0	0	0	0	0	0	0	0	0	0	0	0	0	1	1	1	0	0	0	0	0	0	1	1	1	1	1	1	0	0	0	1	1	1	1	1	1
K2C72_HUMAN	Keratin, type II cytoskeletal 72 OS=Homo sapiens GN=KRT72 PE=1 SV=2	2.902	0.7182	0.001668	5	4	0	9	1	0	7	4	0	11	7	0	15	3	0	11	6	0	44	6	0	17	3	0	17	5	0	14	3	0	26	3	0	13	4	0	11	3	0	18	3	0	14	4	0
HNRLL_HUMAN	Heterogeneous nuclear ribonucleoprotein L-like OS=Homo sapiens GN=HNRPLL PE=1 SV=1	1.497	0.3226	3.04801	0	0	0	0	0	0	0	0	0	0	0	0	0	0	0	1	1	1	0	0	0	0	0	0	0	0	0	0	0	0	0	0	0	0	0	0	0	0	0	0	0	0	0	0	0
SPT5H_HUMAN	Transcription elongation factor SPT5 OS=Homo sapiens GN=SUPT5H PE=1 SV=1	1.808	0.644	0.309436	2	2	2	1	1	1	2	2	2	2	2	2	0	0	0	1	1	1	0	0	0	0	0	0	2	2	2	0	0	0	1	1	1	0	0	0	0	0	0	0	0	0	0	0	0
PRPS1_HUMAN	Ribose-phosphate pyrophosphokinase 1 OS=Homo sapiens GN=PRPS1 PE=1 SV=2	3.236	0.6879	0.005752	1	1	0	0	0	0	2	2	0	2	2	0	0	0	0	3	2	0	0	0	0	0	0	0	0	0	0	0	0	0	0	0	0	0	0	0	0	0	0	0	0	0	1	1	0
MYL3_HUMAN	Myosin light chain 3 OS=Homo sapiens GN=MYL3 PE=1 SV=3	1.94	0.5139	0.314008	1	1	0	0	0	0	0	0	0	0	0	0	0	0	0	0	0	0	0	0	0	0	0	0	0	0	0	0	0	0	0	0	0	0	0	0	0	0	0	0	0	0	0	0	0
NSUN2_HUMAN	tRNA (cytosine(34)-C(5))-methyltransferase OS=Homo sapiens GN=NSUN2 PE=1 SV=2	3.192	0.7295	0.013812	6	6	6	3	3	3	6	6	6	6	6	6	4	4	4	5	5	5	4	4	4	3	3	3	5	5	5	4	4	4	3	3	3	3	3	3	3	3	3	2	2	2	3	3	3
ASNS_HUMAN	Asparagine synthetase [glutamine-hydrolyzing] OS=Homo sapiens GN=ASNS PE=1 SV=4	2.302	0.6538	0.481443	1	1	1	0	0	0	1	1	1	2	2	2	0	0	0	1	1	1	0	0	0	1	1	1	2	2	2	0	0	0	0	0	0	0	0	0	1	1	1	0	0	0	1	1	1
PTMA_HUMAN	Prothymosin alpha OS=Homo sapiens GN=PTMA PE=1 SV=2	1.561	0.5561	0.946817	0	0	0	0	0	0	0	0	0	0	0	0	0	0	0	0	0	0	0	0	0	0	0	0	0	0	0	0	0	0	0	0	0	0	0	0	0	0	0	1	1	1	0	0	0
SURF4_HUMAN	Surfeit locus protein 4 OS=Homo sapiens GN=SURF4 PE=1 SV=3	1.514	0.3593	0.037766	0	0	0	0	0	0	0	0	0	0	0	0	0	0	0	1	1	1	0	0	0	0	0	0	0	0	0	0	0	0	0	0	0	0	0	0	0	0	0	0	0	0	0	0	0
S10AB_HUMAN	Protein S100-A11 OS=Homo sapiens GN=S100A11 PE=1 SV=2	1.835	0.4509	0.031702	2	2	2	0	0	0	1	1	1	1	1	1	2	2	2	0	0	0	0	0	0	0	0	0	0	0	0	2	2	2	0	0	0	0	0	0	2	2	2	2	2	2	3	3	3
THUM3_HUMAN	THUMP domain-containing protein 3 OS=Homo sapiens GN=THUMPD3 PE=1 SV=1	2.168	0.5821	0.475619	0	0	0	0	0	0	1	1	1	0	0	0	0	0	0	0	0	0	0	0	0	0	0	0	0	0	0	0	0	0	0	0	0	0	0	0	0	0	0	0	0	0	0	0	0
EXOS2_HUMAN	Exosome complex component RRP4 OS=Homo sapiens GN=EXOSC2 PE=1 SV=2	1.518	0.5021	0.333874	0	0	0	0	0	0	0	0	0	1	1	1	0	0	0	1	1	1	0	0	0	0	0	0	1	1	1	0	0	0	1	1	1	0	0	0	2	2	2	0	0	0	0	0	0
GMDS_HUMAN	GDP-mannose 4,6 dehydratase OS=Homo sapiens GN=GMDS PE=1 SV=1	2.315	0.7107	0.052741	5	5	5	1	1	1	4	4	4	4	4	4	3	3	3	5	5	5	2	2	2	2	2	2	3	3	3	4	4	4	0	0	0	5	5	5	6	6	6	2	2	2	4	4	4
SNX6_HUMAN	Sorting nexin-6 OS=Homo sapiens GN=SNX6 PE=1 SV=1	2.202	0.5954	0.012319	2	2	1	0	0	0	0	0	0	3	3	2	1	1	0	1	1	1	1	1	0	0	0	0	0	0	0	1	1	0	1	1	1	0	0	0	2	2	1	1	1	0	1	1	0
COPD_HUMAN	Coatomer subunit delta OS=Homo sapiens GN=ARCN1 PE=1 SV=1	2.389	0.7135	0.011625	2	2	2	0	0	0	5	5	5	3	3	3	1	1	1	4	4	4	2	2	2	1	1	1	4	4	4	2	2	2	1	1	1	3	3	3	2	2	2	1	1	1	1	1	1
PSD10_HUMAN	26S proteasome non-ATPase regulatory subunit 10 OS=Homo sapiens GN=PSMD10 PE=1 SV=1	1.779	0.4351	0.906034	1	1	1	0	0	0	0	0	0	1	1	1	0	0	0	1	1	1	0	0	0	0	0	0	1	1	1	0	0	0	0	0	0	0	0	0	0	0	0	0	0	0	1	1	1
RUXE_HUMAN	Small nuclear ribonucleoprotein E OS=Homo sapiens GN=SNRPE PE=1 SV=1	2.151	0.6233	0.104217	2	2	2	0	0	0	0	0	0	1	1	1	1	1	1	0	0	0	0	0	0	0	0	0	0	0	0	1	1	1	0	0	0	0	0	0	1	1	1	0	0	0	0	0	0
EIF3J_HUMAN	Eukaryotic translation initiation factor 3 subunit J OS=Homo sapiens GN=EIF3J PE=1 SV=2	2.108	0.6367	0.022278	4	4	4	1	1	1	2	2	2	4	4	4	2	2	2	3	3	3	0	0	0	1	1	1	3	3	3	2	2	2	0	0	0	2	2	2	5	5	5	0	0	0	2	2	2
MAST3_HUMAN	Microtubule-associated serine/threonine-protein kinase 3 OS=Homo sapiens GN=MAST3 PE=1 SV=2	1.922	0.4043	0.237803	1	1	0	0	0	0	0	0	0	0	0	0	0	0	0	0	0	0	0	0	0	0	0	0	0	0	0	0	0	0	0	0	0	0	0	0	1	1	0	0	0	0	0	0	0
FKB10_HUMAN	Peptidyl-prolyl cis-trans isomerase FKBP10 OS=Homo sapiens GN=FKBP10 PE=1 SV=1	1.679	0.5575	0.001572	2	2	2	0	0	0	1	1	1	2	2	2	0	0	0	2	2	2	0	0	0	0	0	0	0	0	0	0	0	0	0	0	0	0	0	0	3	3	3	0	0	0	0	0	0
TIAR_HUMAN	Nucleolysin TIAR OS=Homo sapiens GN=TIAL1 PE=1 SV=1	2.158	0.6066	0.017301	0	0	0	0	0	0	0	0	0	0	0	0	0	0	0	2	2	2	0	0	0	0	0	0	1	1	0	0	0	0	0	0	0	1	1	1	0	0	0	0	0	0	0	0	0
DOCK8_HUMAN	Dedicator of cytokinesis protein 8 OS=Homo sapiens GN=DOCK8 PE=1 SV=3	1.372	0.2697	0.506069	0	0	0	0	0	0	0	0	0	0	0	0	0	0	0	0	0	0	0	0	0	0	0	0	0	0	0	0	0	0	1	1	1	0	0	0	0	0	0	0	0	0	0	0	0
AMPB_HUMAN	Aminopeptidase B OS=Homo sapiens GN=RNPEP PE=1 SV=2	2.542	0.62	0.059043	1	1	1	0	0	0	0	0	0	1	1	1	0	0	0	1	1	1	0	0	0	0	0	0	0	0	0	0	0	0	0	0	0	0	0	0	1	1	1	0	0	0	0	0	0
KRT85_HUMAN	Keratin, type II cuticular Hb5 OS=Homo sapiens GN=KRT85 PE=1 SV=1	2.633	0.6275	0.005122	0	0	0	0	0	0	9	8	2	11	9	1	2	2	0	0	0	0	0	0	0	6	6	1	1	1	0	3	3	0	1	1	0	2	2	0	0	0	0	0	0	0	0	0	0
RAD50_HUMAN	DNA repair protein RAD50 OS=Homo sapiens GN=RAD50 PE=1 SV=1	2.581	0.615	0.031197	7	7	7	3	3	3	2	2	2	1	1	1	3	3	3	3	3	3	0	0	0	1	1	1	6	6	6	1	1	1	1	1	1	1	1	1	1	1	1	0	0	0	1	1	1
S38A2_HUMAN	Sodium-coupled neutral amino acid transporter 2 OS=Homo sapiens GN=SLC38A2 PE=1 SV=2	1.413	0.5938	0.073059	0	0	0	0	0	0	1	1	1	0	0	0	0	0	0	0	0	0	0	0	0	0	0	0	0	0	0	0	0	0	0	0	0	0	0	0	0	0	0	0	0	0	0	0	0
FUBP3_HUMAN	Far upstream element-binding protein 3 OS=Homo sapiens GN=FUBP3 PE=1 SV=2	2.645	0.612	0.051143	5	5	4	1	1	0	1	1	0	4	4	3	2	2	1	5	5	4	1	1	0	1	1	0	6	6	5	2	2	1	1	1	0	2	2	1	3	3	2	1	1	0	2	2	1
ADSV_HUMAN	Adseverin OS=Homo sapiens GN=SCIN PE=1 SV=4	1.707	0.4738	0.330404	0	0	0	0	0	0	0	0	0	0	0	0	0	0	0	0	0	0	0	0	0	0	0	0	0	0	0	0	0	0	0	0	0	0	0	0	3	3	3	0	0	0	0	0	0
EGFR_HUMAN	Epidermal growth factor receptor OS=Homo sapiens GN=EGFR PE=1 SV=2	2.146	0.6421	0.43254	1	1	1	0	0	0	2	2	1	1	1	1	0	0	0	1	1	1	0	0	0	0	0	0	0	0	0	0	0	0	0	0	0	0	0	0	0	0	0	0	0	0	0	0	0
BHE22_HUMAN	Class E basic helix-loop-helix protein 22 OS=Homo sapiens GN=BHLHE22 PE=2 SV=1	1.481	0.2113	0.467703	1	1	1	0	0	0	0	0	0	1	1	1	0	0	0	0	0	0	0	0	0	0	0	0	1	1	1	0	0	0	0	0	0	0	0	0	0	0	0	0	0	0	0	0	0
HNRPL_HUMAN	Heterogeneous nuclear ribonucleoprotein L OS=Homo sapiens GN=HNRNPL PE=1 SV=2	6.076	0.7855	0.000618	12	9	9	10	9	9	11	11	11	13	9	9	10	7	7	11	8	8	3	3	3	4	4	4	9	7	7	6	5	5	8	6	6	9	8	8	10	9	9	3	3	3	7	6	6
CLIC5_HUMAN	Chloride intracellular channel protein 5 OS=Homo sapiens GN=CLIC5 PE=1 SV=3	1.376	0.2314	0.869552	0	0	0	0	0	0	1	1	0	1	1	0	0	0	0	0	0	0	0	0	0	0	0	0	0	0	0	0	0	0	0	0	0	0	0	0	0	0	0	0	0	0	0	0	0
SPEE_HUMAN	Spermidine synthase OS=Homo sapiens GN=SRM PE=1 SV=1	1.658	0.6386	0.000575	2	2	2	0	0	0	3	3	3	1	1	1	0	0	0	1	1	1	0	0	0	0	0	0	0	0	0	0	0	0	0	0	0	0	0	0	1	1	1	0	0	0	0	0	0
LMNB1_HUMAN	Lamin-B1 OS=Homo sapiens GN=LMNB1 PE=1 SV=2	2.833	0.7327	0.008729	14	14	13	17	16	13	22	21	18	19	17	16	10	10	8	20	19	16	10	8	6	11	9	8	14	14	13	10	9	8	7	7	6	17	16	14	16	15	14	8	7	6	10	10	9
HSP77_HUMAN	Putative heat shock 70 kDa protein 7 OS=Homo sapiens GN=HSPA7 PE=5 SV=2	4.019	0.7767	0.000309	20	4	0	83	4	0	19	4	0	12	4	0	18	4	0	10	4	0	29	4	0	16	4	0	11	4	0	16	4	0	11	4	0	12	4	0	13	4	0	19	4	0	14	4	0
CG050_HUMAN	Uncharacterized protein C7orf50 OS=Homo sapiens GN=C7orf50 PE=1 SV=1	1.62	0.5543	0.885802	1	1	1	0	0	0	1	1	1	0	0	0	0	0	0	0	0	0	0	0	0	0	0	0	0	0	0	0	0	0	0	0	0	0	0	0	0	0	0	0	0	0	0	0	0
UB2V1_HUMAN	Ubiquitin-conjugating enzyme E2 variant 1 OS=Homo sapiens GN=UBE2V1 PE=1 SV=2	2.272	0.5808	0.034754	2	2	1	0	0	0	1	1	0	1	1	1	0	0	0	2	2	1	0	0	0	0	0	0	1	1	0	0	0	0	0	0	0	0	0	0	2	2	1	0	0	0	0	0	0
SPRE_HUMAN	Sepiapterin reductase OS=Homo sapiens GN=SPR PE=1 SV=1	1.459	0.5079	0.44629	0	0	0	0	0	0	1	1	1	0	0	0	0	0	0	0	0	0	0	0	0	0	0	0	0	0	0	0	0	0	0	0	0	0	0	0	0	0	0	0	0	0	0	0	0
ISG15_HUMAN	Ubiquitin-like protein ISG15 OS=Homo sapiens GN=ISG15 PE=1 SV=5	2.274	0.5303	0.260048	1	1	1	0	0	0	0	0	0	0	0	0	0	0	0	0	0	0	0	0	0	0	0	0	0	0	0	0	0	0	0	0	0	0	0	0	0	0	0	0	0	0	0	0	0
RPAC1_HUMAN	DNA-directed RNA polymerases I and III subunit RPAC1 OS=Homo sapiens GN=POLR1C PE=1 SV=1	1.312	0.3521	1.2735	0	0	0	0	0	0	1	1	1	0	0	0	0	0	0	0	0	0	0	0	0	0	0	0	0	0	0	0	0	0	0	0	0	0	0	0	0	0	0	0	0	0	0	0	0
DAB2_HUMAN	Disabled homolog 2 OS=Homo sapiens GN=DAB2 PE=1 SV=3	2.17	0.6557	0.089117	2	2	2	0	0	0	1	1	1	1	1	1	0	0	0	0	0	0	0	0	0	0	0	0	0	0	0	0	0	0	0	0	0	0	0	0	1	1	1	0	0	0	0	0	0
HV301_HUMAN	Ig heavy chain V-III region TRO OS=Homo sapiens PE=1 SV=1	1.928	0.3422	0.00165	0	0	0	0	0	0	0	0	0	0	0	0	1	1	0	0	0	0	0	0	0	0	0	0	0	0	0	0	0	0	0	0	0	1	1	0	0	0	0	0	0	0	0	0	0
AT5F1_HUMAN	ATP synthase subunit b, mitochondrial OS=Homo sapiens GN=ATP5F1 PE=1 SV=2	1.814	0.5656	0.288627	3	3	3	0	0	0	0	0	0	1	1	1	0	0	0	0	0	0	0	0	0	0	0	0	0	0	0	0	0	0	0	0	0	0	0	0	3	3	3	0	0	0	0	0	0
LARP4_HUMAN	La-related protein 4 OS=Homo sapiens GN=LARP4 PE=1 SV=3	1.936	0.5883	0.031697	0	0	0	0	0	0	0	0	0	0	0	0	0	0	0	1	1	1	0	0	0	0	0	0	2	2	2	0	0	0	0	0	0	0	0	0	0	0	0	0	0	0	0	0	0
GBLP_HUMAN	Guanine nucleotide-binding protein subunit beta-2-like 1 OS=Homo sapiens GN=GNB2L1 PE=1 SV=3	2.856	0.7725	0.018766	6	6	6	3	3	3	6	4	4	9	8	8	6	4	4	9	7	7	5	3	3	4	3	3	8	7	7	5	4	4	2	2	2	4	3	3	8	7	7	4	3	3	4	3	3
ODPAT_HUMAN	Pyruvate dehydrogenase E1 component subunit alpha, testis-specific form, mitochondrial OS=Homo sapiens GN=PDHA2 PE=1 SV=1	1.79	0.3575	1.12657	0	0	0	0	0	0	1	1	0	1	1	0	0	0	0	0	0	0	0	0	0	0	0	0	0	0	0	0	0	0	0	0	0	0	0	0	0	0	0	0	0	0	0	0	0
CARF_HUMAN	CDKN2A-interacting protein OS=Homo sapiens GN=CDKN2AIP PE=1 SV=3	2.376	0.7258	0.093911	3	3	3	2	2	2	3	3	3	1	1	1	1	1	1	3	3	3	0	0	0	0	0	0	2	2	2	0	0	0	0	0	0	1	1	1	1	1	1	0	0	0	1	1	1
ARP3B_HUMAN	Actin-related protein 3B OS=Homo sapiens GN=ACTR3B PE=1 SV=1	2.196	0.5823	0.003368	2	2	0	0	0	0	2	2	0	2	2	0	1	1	0	2	2	0	0	0	0	2	2	0	1	1	0	1	1	0	0	0	0	1	1	0	2	2	0	0	0	0	1	1	0
SUMO3_HUMAN	Small ubiquitin-related modifier 3 OS=Homo sapiens GN=SUMO3 PE=1 SV=2	2.685	0.6425	0.03452	1	1	0	1	1	0	1	1	0	1	1	0	0	0	0	0	0	0	0	0	0	0	0	0	2	1	0	0	0	0	0	0	0	0	0	0	0	0	0	0	0	0	0	0	0
RS28_HUMAN	40S ribosomal protein S28 OS=Homo sapiens GN=RPS28 PE=1 SV=1	2.294	0.7166	0.008624	4	2	2	2	2	2	3	2	2	3	2	2	2	2	2	3	2	2	2	1	1	2	1	1	2	1	1	2	1	1	2	2	2	1	1	1	3	2	2	2	1	1	2	1	1
DSG2_HUMAN	Desmoglein-2 OS=Homo sapiens GN=DSG2 PE=1 SV=2	1.763	0.3086	0.126208	0	0	0	0	0	0	0	0	0	0	0	0	0	0	0	0	0	0	0	0	0	0	0	0	1	1	1	0	0	0	0	0	0	0	0	0	0	0	0	0	0	0	0	0	0
CAF1B_HUMAN	Chromatin assembly factor 1 subunit B OS=Homo sapiens GN=CHAF1B PE=1 SV=1	2.042	0.4452	1.22655	0	0	0	0	0	0	0	0	0	1	1	1	0	0	0	0	0	0	0	0	0	0	0	0	0	0	0	0	0	0	0	0	0	0	0	0	0	0	0	0	0	0	0	0	0
LMO7_HUMAN	LIM domain only protein 7 OS=Homo sapiens GN=LMO7 PE=1 SV=3	1.791	0.5366	0.39048	0	0	0	0	0	0	0	0	0	0	0	0	0	0	0	0	0	0	0	0	0	0	0	0	3	3	3	0	0	0	0	0	0	0	0	0	0	0	0	0	0	0	0	0	0
PURB_HUMAN	Transcriptional activator protein Pur-beta OS=Homo sapiens GN=PURB PE=1 SV=3	1.266	0.5545	0.078268	1	1	1	0	0	0	0	0	0	0	0	0	0	0	0	0	0	0	0	0	0	0	0	0	0	0	0	0	0	0	0	0	0	0	0	0	0	0	0	0	0	0	0	0	0
KTN1_HUMAN	Kinectin OS=Homo sapiens GN=KTN1 PE=1 SV=1	2.371	0.6227	0.015815	2	2	2	0	0	0	2	2	2	2	2	2	3	3	3	4	4	4	2	2	2	1	1	1	3	3	3	2	2	2	0	0	0	2	2	2	5	5	5	0	0	0	2	2	2
HEBP1_HUMAN	Heme-binding protein 1 OS=Homo sapiens GN=HEBP1 PE=1 SV=1	2.158	0.5933	0.022361	0	0	0	0	0	0	0	0	0	0	0	0	0	0	0	2	2	2	0	0	0	0	0	0	0	0	0	0	0	0	0	0	0	0	0	0	1	1	1	0	0	0	0	0	0
FA49B_HUMAN	Protein FAM49B OS=Homo sapiens GN=FAM49B PE=1 SV=1	2.613	0.6142	0.162164	0	0	0	0	0	0	1	1	1	0	0	0	0	0	0	1	1	1	0	0	0	0	0	0	0	0	0	0	0	0	0	0	0	0	0	0	1	1	1	0	0	0	0	0	0
STAT3_HUMAN	Signal transducer and activator of transcription 3 OS=Homo sapiens GN=STAT3 PE=1 SV=2	2.107	0.5278	0.042951	1	1	1	1	1	1	1	1	1	3	3	3	0	0	0	0	0	0	1	1	1	0	0	0	2	2	2	1	1	1	1	1	1	0	0	0	0	0	0	0	0	0	0	0	0
HKDC1_HUMAN	Putative hexokinase HKDC1 OS=Homo sapiens GN=HKDC1 PE=2 SV=3	1.879	0.5533	0.287224	1	1	0	0	0	0	2	2	0	1	1	0	0	0	0	0	0	0	0	0	0	0	0	0	0	0	0	0	0	0	0	0	0	0	0	0	0	0	0	0	0	0	0	0	0
PLK1_HUMAN	Serine/threonine-protein kinase PLK1 OS=Homo sapiens GN=PLK1 PE=1 SV=1	2.154	0.5972	0.011637	2	2	2	0	0	0	3	3	3	3	3	3	0	0	0	4	4	4	0	0	0	0	0	0	2	2	2	0	0	0	0	0	0	1	1	1	2	2	2	0	0	0	0	0	0
AT11A_HUMAN	Probable phospholipid-transporting ATPase IH OS=Homo sapiens GN=ATP11A PE=1 SV=3	1.665	0.42	0.077996	1	1	0	1	1	0	0	0	0	1	1	0	0	0	0	1	1	0	1	1	0	0	0	0	1	1	0	1	1	0	0	0	0	0	0	0	1	1	0	0	0	0	1	1	0
THIO_HUMAN	Thioredoxin OS=Homo sapiens GN=TXN PE=1 SV=3	3.011	0.6924	0.000493	9	7	7	5	3	3	4	3	3	7	5	5	4	4	4	4	3	3	2	1	1	3	3	3	5	4	4	6	3	3	1	1	1	3	3	3	10	5	5	3	3	3	4	3	3
SRP54_HUMAN	Signal recognition particle 54 kDa protein OS=Homo sapiens GN=SRP54 PE=1 SV=1	2.177	0.4415	0.394371	1	1	1	0	0	0	0	0	0	0	0	0	1	1	1	1	1	1	0	0	0	0	0	0	0	0	0	0	0	0	0	0	0	0	0	0	0	0	0	0	0	0	0	0	0
AF9_HUMAN	Protein AF-9 OS=Homo sapiens GN=MLLT3 PE=1 SV=2	1.29	0.4488	2.97826	0	0	0	0	0	0	0	0	0	0	0	0	0	0	0	0	0	0	0	0	0	0	0	0	0	0	0	0	0	0	0	0	0	0	0	0	0	0	0	0	0	0	0	0	0
AT131_HUMAN	Probable cation-transporting ATPase 13A1 OS=Homo sapiens GN=ATP13A1 PE=1 SV=2	0.981	0.2375	1.62728	1	1	1	0	0	0	0	0	0	0	0	0	0	0	0	0	0	0	0	0	0	0	0	0	0	0	0	0	0	0	0	0	0	0	0	0	0	0	0	0	0	0	0	0	0
RCN2_HUMAN	Reticulocalbin-2 OS=Homo sapiens GN=RCN2 PE=1 SV=1	1.432	0.3348	0.087956	0	0	0	0	0	0	1	1	1	0	0	0	0	0	0	0	0	0	0	0	0	1	1	1	0	0	0	0	0	0	0	0	0	0	0	0	0	0	0	0	0	0	0	0	0
MARE2_HUMAN	Microtubule-associated protein RP/EB family member 2 OS=Homo sapiens GN=MAPRE2 PE=1 SV=1	1.189	0.3281	0.653536	1	1	0	0	0	0	0	0	0	0	0	0	0	0	0	1	1	0	0	0	0	0	0	0	0	0	0	0	0	0	0	0	0	0	0	0	0	0	0	0	0	0	0	0	0
ILF3_HUMAN	Interleukin enhancer-binding factor 3 OS=Homo sapiens GN=ILF3 PE=1 SV=3	3.791	0.7455	0.00648	17	15	14	5	3	3	10	8	6	12	10	8	5	3	3	17	12	9	1	1	1	4	4	3	13	10	9	6	6	6	2	2	2	13	10	8	8	8	7	1	1	1	7	7	6
GYS1_HUMAN	Glycogen [starch] synthase, muscle OS=Homo sapiens GN=GYS1 PE=1 SV=2	1.18	0.439	0.119846	0	0	0	0	0	0	0	0	0	0	0	0	0	0	0	0	0	0	0	0	0	0	0	0	0	0	0	0	0	0	0	0	0	0	0	0	1	1	1	0	0	0	0	0	0
RFIP1_HUMAN	Rab11 family-interacting protein 1 OS=Homo sapiens GN=RAB11FIP1 PE=1 SV=2	1.112	0.3138	0.178225	0	0	0	0	0	0	0	0	0	1	1	1	0	0	0	0	0	0	0	0	0	0	0	0	0	0	0	0	0	0	1	1	1	0	0	0	0	0	0	1	1	1	0	0	0
CAPZB_HUMAN	F-actin-capping protein subunit beta OS=Homo sapiens GN=CAPZB PE=1 SV=4	3.271	0.6904	0.011625	3	3	3	2	2	2	3	3	3	7	6	6	6	6	6	4	4	4	2	2	2	3	3	3	5	5	5	3	3	3	1	1	1	4	4	4	7	6	6	3	2	2	5	4	4
ITB1_HUMAN	Integrin beta-1 OS=Homo sapiens GN=ITGB1 PE=1 SV=2	2.499	0.6752	0.010067	4	4	4	0	0	0	5	5	5	5	5	5	2	2	2	7	7	7	1	1	1	2	2	2	4	4	4	2	2	2	1	1	1	5	5	5	4	4	4	1	1	1	2	2	2
L1CAM_HUMAN	Neural cell adhesion molecule L1 OS=Homo sapiens GN=L1CAM PE=1 SV=2	2.447	0.6506	0.049107	2	2	2	1	1	1	3	3	3	2	2	2	1	1	1	2	2	2	1	1	1	1	1	1	3	3	3	2	2	2	1	1	1	1	1	1	3	3	3	0	0	0	2	2	2
BFSP2_HUMAN	Phakinin OS=Homo sapiens GN=BFSP2 PE=1 SV=1	1.636	0.1604	1.34223	0	0	0	0	0	0	0	0	0	1	1	0	0	0	0	0	0	0	0	0	0	0	0	0	0	0	0	1	1	0	0	0	0	0	0	0	0	0	0	0	0	0	0	0	0
POTEI_HUMAN	POTE ankyrin domain family member I OS=Homo sapiens GN=POTEI PE=3 SV=1	3.895	0.6838	0.001569	11	3	0	17	3	0	16	4	0	27	3	0	18	3	0	17	3	0	29	2	0	18	3	0	14	3	0	22	3	0	8	3	0	13	3	0	26	3	0	19	3	0	13	2	0
SF3B3_HUMAN	Splicing factor 3B subunit 3 OS=Homo sapiens GN=SF3B3 PE=1 SV=4	2.35	0.7471	0.010155	11	11	11	5	5	5	9	9	9	8	8	8	4	4	4	13	12	12	4	4	4	3	3	3	9	9	9	4	4	4	3	3	3	5	5	5	7	7	7	2	2	2	1	1	1
NP1L4_HUMAN	Nucleosome assembly protein 1-like 4 OS=Homo sapiens GN=NAP1L4 PE=1 SV=1	2.624	0.6868	0.004202	5	5	4	3	3	2	6	5	4	4	4	3	3	3	2	3	3	2	1	1	1	3	3	3	3	3	2	3	3	3	1	1	1	3	3	2	4	4	3	1	1	1	2	2	2
HSP71_HUMAN	Heat shock 70 kDa protein 1A/1B OS=Homo sapiens GN=HSPA1A PE=1 SV=5	4.752	0.8253	0.000307	180	46	25	218	34	16	124	41	21	54	28	11	45	22	9	47	27	12	47	18	5	41	23	8	46	25	11	47	23	8	30	18	9	36	21	8	49	22	9	36	16	5	42	22	7
DYHC1_HUMAN	Cytoplasmic dynein 1 heavy chain 1 OS=Homo sapiens GN=DYNC1H1 PE=1 SV=5	3.402	0.7079	0.006638	57	56	56	23	23	23	54	52	52	22	22	22	7	7	7	34	33	33	4	4	4	5	5	5	23	23	23	17	17	17	3	3	3	15	15	15	12	12	12	0	0	0	11	11	11
CPNS1_HUMAN	Calpain small subunit 1 OS=Homo sapiens GN=CAPNS1 PE=1 SV=1	3.47	0.7474	0.054776	2	2	1	0	0	0	2	2	1	2	2	1	0	0	0	2	2	1	0	0	0	0	0	0	1	1	0	0	0	0	0	0	0	0	0	0	2	2	1	0	0	0	0	0	0
CPSF6_HUMAN	Cleavage and polyadenylation specificity factor subunit 6 OS=Homo sapiens GN=CPSF6 PE=1 SV=2	2.581	0.7146	0.086056	2	2	2	0	0	0	2	2	2	2	2	2	0	0	0	1	1	1	0	0	0	0	0	0	1	1	1	0	0	0	0	0	0	2	2	2	1	1	1	0	0	0	0	0	0
SPTB1_HUMAN	Spectrin beta chain, erythrocytic OS=Homo sapiens GN=SPTB PE=1 SV=5	1.374	0.4061	0.250954	1	1	0	1	1	0	1	1	0	1	1	0	1	1	0	0	0	0	0	0	0	0	0	0	0	0	0	0	0	0	0	0	0	0	0	0	1	1	0	0	0	0	0	0	0
UBQL2_HUMAN	Ubiquilin-2 OS=Homo sapiens GN=UBQLN2 PE=1 SV=2	2.814	0.7853	0.057846	2	2	1	0	0	0	1	1	1	2	2	1	0	0	0	1	1	1	0	0	0	1	1	1	1	1	1	0	0	0	0	0	0	0	0	0	1	1	1	0	0	0	0	0	0
RSU1_HUMAN	Ras suppressor protein 1 OS=Homo sapiens GN=RSU1 PE=1 SV=3	1.724	0.2894	0.215782	1	1	1	0	0	0	0	0	0	0	0	0	0	0	0	0	0	0	0	0	0	0	0	0	0	0	0	0	0	0	0	0	0	0	0	0	1	1	1	0	0	0	0	0	0
SUMO2_HUMAN	Small ubiquitin-related modifier 2 OS=Homo sapiens GN=SUMO2 PE=1 SV=3	2.685	0.6425	0.03452	1	1	0	1	1	0	1	1	0	2	2	1	0	0	0	0	0	0	0	0	0	0	0	0	3	2	1	0	0	0	0	0	0	0	0	0	0	0	0	0	0	0	0	0	0
PININ_HUMAN	Pinin OS=Homo sapiens GN=PNN PE=1 SV=4	1.606	0.3661	0.023237	0	0	0	1	1	1	0	0	0	0	0	0	0	0	0	0	0	0	0	0	0	0	0	0	0	0	0	0	0	0	0	0	0	0	0	0	1	1	1	0	0	0	0	0	0
MAST1_HUMAN	Microtubule-associated serine/threonine-protein kinase 1 OS=Homo sapiens GN=MAST1 PE=1 SV=2	1.922	0.4043	0.237803	1	1	0	0	0	0	0	0	0	0	0	0	0	0	0	0	0	0	0	0	0	0	0	0	0	0	0	0	0	0	0	0	0	0	0	0	1	1	0	0	0	0	0	0	0
PSME1_HUMAN	Proteasome activator complex subunit 1 OS=Homo sapiens GN=PSME1 PE=1 SV=1	1.607	0.5476	0.298576	3	3	3	0	0	0	0	0	0	0	0	0	0	0	0	0	0	0	0	0	0	0	0	0	0	0	0	0	0	0	0	0	0	1	1	1	0	0	0	0	0	0	0	0	0
NUP50_HUMAN	Nuclear pore complex protein Nup50 OS=Homo sapiens GN=NUP50 PE=1 SV=2	1.46	0.6179	0.593567	0	0	0	0	0	0	0	0	0	0	0	0	0	0	0	1	1	1	0	0	0	0	0	0	3	3	3	0	0	0	0	0	0	0	0	0	0	0	0	0	0	0	0	0	0
DCTN2_HUMAN	Dynactin subunit 2 OS=Homo sapiens GN=DCTN2 PE=1 SV=4	2.119	0.6368	0.289103	1	1	1	0	0	0	2	2	2	0	0	0	0	0	0	2	2	2	0	0	0	0	0	0	1	1	1	0	0	0	1	1	1	2	2	2	0	0	0	0	0	0	2	2	2
ACTY_HUMAN	Beta-centractin OS=Homo sapiens GN=ACTR1B PE=1 SV=1	2.257	0.5714	0.004223	1	1	0	2	2	0	0	0	0	1	1	0	2	2	0	1	1	0	1	1	0	2	2	0	2	2	0	1	1	0	2	2	0	1	1	0	1	1	0	1	1	0	2	2	0
CPNE4_HUMAN	Copine-4 OS=Homo sapiens GN=CPNE4 PE=2 SV=1	1.819	0.4959	0.505419	1	1	0	0	0	0	0	0	0	0	0	0	0	0	0	0	0	0	0	0	0	0	0	0	0	0	0	0	0	0	0	0	0	0	0	0	0	0	0	0	0	0	0	0	0
APOD_HUMAN	Apolipoprotein D OS=Homo sapiens GN=APOD PE=1 SV=1	1.461	0.3128	0.220746	0	0	0	0	0	0	0	0	0	0	0	0	1	1	1	0	0	0	0	0	0	0	0	0	0	0	0	0	0	0	0	0	0	0	0	0	0	0	0	0	0	0	0	0	0
PSB7_HUMAN	Proteasome subunit beta type-7 OS=Homo sapiens GN=PSMB7 PE=1 SV=1	2.387	0.6037	0.009036	8	6	6	5	4	4	5	4	4	3	3	3	3	3	3	4	4	4	1	1	1	2	2	2	3	3	3	4	3	3	2	2	2	5	4	4	4	4	4	3	3	3	5	4	4
RBM10_HUMAN	RNA-binding protein 10 OS=Homo sapiens GN=RBM10 PE=1 SV=3	1.267	0.3867	0.329425	1	1	1	0	0	0	0	0	0	0	0	0	0	0	0	0	0	0	0	0	0	0	0	0	0	0	0	0	0	0	0	0	0	0	0	0	0	0	0	0	0	0	0	0	0
ATP5H_HUMAN	ATP synthase subunit d, mitochondrial OS=Homo sapiens GN=ATP5H PE=1 SV=3	2.167	0.3852	0.284231	2	2	2	0	0	0	0	0	0	0	0	0	0	0	0	0	0	0	0	0	0	0	0	0	0	0	0	0	0	0	0	0	0	0	0	0	0	0	0	0	0	0	0	0	0
ADNP_HUMAN	Activity-dependent neuroprotector homeobox protein OS=Homo sapiens GN=ADNP PE=1 SV=1	1.949	0.3617	0.929035	0	0	0	0	0	0	0	0	0	0	0	0	0	0	0	1	1	1	0	0	0	0	0	0	0	0	0	0	0	0	0	0	0	0	0	0	0	0	0	0	0	0	0	0	0
K2C80_HUMAN	Keratin, type II cytoskeletal 80 OS=Homo sapiens GN=KRT80 PE=1 SV=2	2.919	0.7089	0.010815	2	2	2	0	0	0	2	2	2	5	5	5	2	2	2	4	4	4	2	2	2	1	1	1	2	2	2	0	0	0	1	1	1	4	4	4	1	1	1	2	2	2	0	0	0
CLIC1_HUMAN	Chloride intracellular channel protein 1 OS=Homo sapiens GN=CLIC1 PE=1 SV=4	2.996	0.6318	0.025876	3	3	3	1	1	1	4	4	3	4	4	3	1	1	1	4	4	4	0	0	0	1	1	1	2	2	2	2	2	2	1	1	1	2	2	2	3	2	2	1	1	1	2	2	2
SAR1B_HUMAN	GTP-binding protein SAR1b OS=Homo sapiens GN=SAR1B PE=1 SV=1	2.215	0.5508	0.100623	3	3	1	1	1	0	2	2	1	0	0	0	0	0	0	2	2	0	0	0	0	0	0	0	0	0	0	0	0	0	0	0	0	0	0	0	0	0	0	0	0	0	1	1	0
PRP31_HUMAN	U4/U6 small nuclear ribonucleoprotein Prp31 OS=Homo sapiens GN=PRPF31 PE=1 SV=2	1.879	0.6457	0.151453	1	1	1	0	0	0	0	0	0	1	1	1	0	0	0	0	0	0	0	0	0	1	1	1	2	2	2	1	1	1	0	0	0	1	1	1	0	0	0	0	0	0	0	0	0
DIDO1_HUMAN	Death-inducer obliterator 1 OS=Homo sapiens GN=DIDO1 PE=1 SV=5	1.493	0.4	0.250022	2	2	2	0	0	0	0	0	0	0	0	0	0	0	0	0	0	0	0	0	0	0	0	0	0	0	0	0	0	0	0	0	0	0	0	0	0	0	0	0	0	0	0	0	0
SRP68_HUMAN	Signal recognition particle 68 kDa protein OS=Homo sapiens GN=SRP68 PE=1 SV=2	2.263	0.6473	0.131525	0	0	0	0	0	0	0	0	0	3	3	3	0	0	0	2	2	2	0	0	0	0	0	0	0	0	0	1	1	1	1	1	1	0	0	0	2	2	2	0	0	0	0	0	0
FILA_HUMAN	Filaggrin OS=Homo sapiens GN=FLG PE=1 SV=3	3.58	0.7385	0.081875	0	0	0	0	0	0	1	1	1	3	3	3	1	1	1	1	1	1	1	1	1	1	1	1	0	0	0	0	0	0	0	0	0	2	2	2	1	1	1	1	1	1	0	0	0
YLAT1_HUMAN	Y+L amino acid transporter 1 OS=Homo sapiens GN=SLC7A7 PE=1 SV=2	1.278	0.1963	0.376008	1	1	0	0	0	0	0	0	0	1	1	0	0	0	0	0	0	0	0	0	0	0	0	0	0	0	0	0	0	0	0	0	0	0	0	0	0	0	0	0	0	0	0	0	0
HUG1_HUMAN	Putative uncharacterized protein HUG-1 OS=Homo sapiens GN=HUG1 PE=5 SV=2	1.121	0.4571	0.090317	1	1	1	0	0	0	1	1	1	1	1	1	0	0	0	1	1	1	1	1	1	1	1	1	1	1	1	1	1	1	0	0	0	1	1	1	1	1	1	1	1	1	0	0	0
SNG2_HUMAN	Synaptogyrin-2 OS=Homo sapiens GN=SYNGR2 PE=1 SV=1	1.592	0.4896	0.028742	0	0	0	0	0	0	0	0	0	0	0	0	0	0	0	0	0	0	0	0	0	0	0	0	0	0	0	0	0	0	0	0	0	0	0	0	1	1	1	0	0	0	0	0	0
DDTL_HUMAN	D-dopachrome decarboxylase-like protein OS=Homo sapiens GN=DDTL PE=2 SV=1	1.8	0.2966	0.678201	0	0	0	0	0	0	0	0	0	1	1	0	0	0	0	0	0	0	0	0	0	0	0	0	0	0	0	0	0	0	0	0	0	0	0	0	1	1	0	0	0	0	0	0	0
EMD_HUMAN	Emerin OS=Homo sapiens GN=EMD PE=1 SV=1	3.332	0.7385	0.001104	4	4	4	3	3	3	7	7	7	4	4	4	3	3	3	6	6	6	3	3	3	6	6	6	7	7	7	3	3	3	3	3	3	5	5	5	4	4	4	3	3	3	5	5	5
CKAP2_HUMAN	Cytoskeleton-associated protein 2 OS=Homo sapiens GN=CKAP2 PE=1 SV=1	1.367	0.6379	0.465325	0	0	0	0	0	0	0	0	0	0	0	0	0	0	0	0	0	0	0	0	0	0	0	0	1	1	1	0	0	0	0	0	0	0	0	0	0	0	0	0	0	0	0	0	0
ODP2_HUMAN	Dihydrolipoyllysine-residue acetyltransferase component of pyruvate dehydrogenase complex, mitochondrial OS=Homo sapiens GN=DLAT PE=1 SV=3	1.641	0.4599	0.211791	4	4	4	0	0	0	1	1	1	1	1	1	0	0	0	2	2	2	0	0	0	0	0	0	1	1	1	0	0	0	0	0	0	0	0	0	0	0	0	0	0	0	0	0	0
CMBL_HUMAN	Carboxymethylenebutenolidase homolog OS=Homo sapiens GN=CMBL PE=1 SV=1	2.241	0.5774	0.029158	3	3	3	2	2	2	3	3	3	2	2	2	1	1	1	4	4	4	1	1	1	2	2	2	2	2	2	2	2	2	2	2	2	2	2	2	2	2	2	2	2	2	1	1	1
HV310_HUMAN	Ig heavy chain V-III region HIL OS=Homo sapiens PE=1 SV=1	1.928	0.3422	0.00165	0	0	0	0	0	0	0	0	0	0	0	0	1	1	0	0	0	0	0	0	0	0	0	0	0	0	0	0	0	0	0	0	0	1	1	0	0	0	0	0	0	0	0	0	0
NPM_HUMAN	Nucleophosmin OS=Homo sapiens GN=NPM1 PE=1 SV=2	3.822	0.7734	0.008154	14	10	10	11	8	8	18	11	11	22	14	14	20	10	10	17	9	9	18	7	7	12	6	6	18	11	11	25	14	14	9	8	8	17	10	10	19	11	11	8	5	5	15	6	6
HAS1_HUMAN	Hyaluronan synthase 1 OS=Homo sapiens GN=HAS1 PE=1 SV=2	1.321	0.261	0.076171	1	1	1	0	0	0	0	0	0	0	0	0	1	1	1	1	1	1	1	1	1	1	1	1	1	1	1	0	0	0	0	0	0	0	0	0	0	0	0	0	0	0	1	1	1
CISY_HUMAN	Citrate synthase, mitochondrial OS=Homo sapiens GN=CS PE=1 SV=2	3.008	0.7101	0.048629	4	4	4	0	0	0	2	2	2	4	4	4	2	2	2	3	3	3	2	2	2	2	2	2	3	3	3	2	2	2	0	0	0	2	2	2	2	2	2	1	1	1	2	2	2
PABP3_HUMAN	Polyadenylate-binding protein 3 OS=Homo sapiens GN=PABPC3 PE=1 SV=2	3.129	0.6399	0.00831	9	8	0	4	4	0	8	8	0	6	6	0	5	5	0	7	7	0	2	2	0	4	4	0	5	5	0	3	3	0	6	6	0	6	6	0	5	5	0	3	3	0	3	3	0
NU188_HUMAN	Nucleoporin NUP188 homolog OS=Homo sapiens GN=NUP188 PE=1 SV=1	1.415	0.3915	0.281691	0	0	0	0	0	0	1	1	1	1	1	1	0	0	0	0	0	0	0	0	0	0	0	0	0	0	0	0	0	0	0	0	0	0	0	0	0	0	0	0	0	0	0	0	0
TLN1_HUMAN	Talin-1 OS=Homo sapiens GN=TLN1 PE=1 SV=3	3.359	0.6706	0.017471	3	3	3	2	2	2	2	2	1	3	3	3	2	2	2	9	9	7	0	0	0	2	2	2	7	7	7	2	2	2	2	2	2	2	2	2	7	7	6	1	1	1	0	0	0
DFFA_HUMAN	DNA fragmentation factor subunit alpha OS=Homo sapiens GN=DFFA PE=1 SV=1	1.572	0.3791	0.114846	0	0	0	0	0	0	0	0	0	0	0	0	0	0	0	1	1	1	0	0	0	0	0	0	0	0	0	0	0	0	0	0	0	0	0	0	0	0	0	0	0	0	0	0	0
SSFA2_HUMAN	Sperm-specific antigen 2 OS=Homo sapiens GN=SSFA2 PE=1 SV=3	1.525	0.3331	0.15806	0	0	0	0	0	0	0	0	0	0	0	0	0	0	0	0	0	0	0	0	0	0	0	0	0	0	0	0	0	0	0	0	0	0	0	0	1	1	1	0	0	0	0	0	0
SRRM1_HUMAN	Serine/arginine repetitive matrix protein 1 OS=Homo sapiens GN=SRRM1 PE=1 SV=2	1.234	0.2601	0.602296	0	0	0	0	0	0	0	0	0	1	1	1	0	0	0	0	0	0	0	0	0	0	0	0	0	0	0	0	0	0	0	0	0	0	0	0	0	0	0	0	0	0	0	0	0
HV303_HUMAN	Ig heavy chain V-III region VH26 OS=Homo sapiens PE=1 SV=1	1.928	0.3422	0.00165	0	0	0	0	0	0	0	0	0	0	0	0	1	1	0	0	0	0	0	0	0	0	0	0	0	0	0	0	0	0	0	0	0	1	1	0	0	0	0	0	0	0	0	0	0
SH24A_HUMAN	SH2 domain-containing protein 4A OS=Homo sapiens GN=SH2D4A PE=1 SV=1	1.115	0.2996	0.624864	1	1	1	0	0	0	0	0	0	0	0	0	0	0	0	0	0	0	0	0	0	0	0	0	0	0	0	0	0	0	0	0	0	0	0	0	0	0	0	0	0	0	0	0	0
LAMC1_HUMAN	Laminin subunit gamma-1 OS=Homo sapiens GN=LAMC1 PE=1 SV=3	1.272	0.6124	0.093855	0	0	0	1	1	1	1	1	1	0	0	0	0	0	0	0	0	0	0	0	0	0	0	0	0	0	0	0	0	0	0	0	0	1	1	1	0	0	0	0	0	0	0	0	0
SPB3_HUMAN	Serpin B3 OS=Homo sapiens GN=SERPINB3 PE=1 SV=2	2.337	0.6047	0.16817	0	0	0	0	0	0	1	1	0	1	1	0	2	2	0	1	1	0	4	4	1	0	0	0	1	1	0	2	2	0	1	1	0	1	1	0	3	3	0	0	0	0	0	0	0
CDK13_HUMAN	Cyclin-dependent kinase 13 OS=Homo sapiens GN=CDK13 PE=1 SV=2	2.193	0.5481	0.256957	2	1	0	1	1	0	1	1	0	1	1	0	1	1	0	1	1	0	0	0	0	1	1	0	1	1	0	1	1	0	1	1	0	1	1	0	1	1	0	0	0	0	1	1	0
PPIL1_HUMAN	Peptidyl-prolyl cis-trans isomerase-like 1 OS=Homo sapiens GN=PPIL1 PE=1 SV=1	1.365	0.4484	0.274355	2	2	2	0	0	0	0	0	0	0	0	0	0	0	0	0	0	0	0	0	0	0	0	0	0	0	0	0	0	0	0	0	0	0	0	0	0	0	0	0	0	0	0	0	0
HSP7C_HUMAN	Heat shock cognate 71 kDa protein OS=Homo sapiens GN=HSPA8 PE=1 SV=1	4.576	0.833	0.001292	188	52	35	257	45	29	146	48	34	95	34	19	75	33	21	79	37	24	87	24	12	66	27	15	70	35	22	85	30	16	51	25	13	72	31	17	83	31	17	49	24	13	70	28	16
PLIN3_HUMAN	Perilipin-3 OS=Homo sapiens GN=PLIN3 PE=1 SV=3	1.812	0.5354	0.03669	0	0	0	0	0	0	1	1	1	0	0	0	0	0	0	1	1	1	0	0	0	0	0	0	1	1	1	1	1	1	0	0	0	1	1	1	1	1	1	0	0	0	1	1	1
ARF5_HUMAN	ADP-ribosylation factor 5 OS=Homo sapiens GN=ARF5 PE=1 SV=2	2.478	0.6005	0.005998	4	4	1	2	2	1	2	2	1	1	1	0	1	1	1	3	2	1	1	1	1	1	1	1	2	2	1	1	1	1	1	1	1	0	0	0	2	2	1	0	0	0	1	1	0
GNPI2_HUMAN	Glucosamine-6-phosphate isomerase 2 OS=Homo sapiens GN=GNPDA2 PE=1 SV=1	1.147	0.4534	1.88837	1	1	0	0	0	0	0	0	0	0	0	0	0	0	0	0	0	0	0	0	0	0	0	0	0	0	0	0	0	0	0	0	0	0	0	0	0	0	0	0	0	0	0	0	0
CDK15_HUMAN	Cyclin-dependent kinase 15 OS=Homo sapiens GN=CDK15 PE=2 SV=2	2.193	0.5481	0.256957	2	1	0	1	1	0	1	1	0	1	1	0	1	1	0	1	1	0	0	0	0	1	1	0	1	1	0	1	1	0	1	1	0	1	1	0	1	1	0	0	0	0	1	1	0
EIF3F_HUMAN	Eukaryotic translation initiation factor 3 subunit F OS=Homo sapiens GN=EIF3F PE=1 SV=1	2.26	0.7027	0.005905	3	3	3	2	2	2	3	3	3	4	4	4	0	0	0	3	3	3	0	0	0	0	0	0	3	3	3	1	1	1	1	1	1	1	1	1	1	1	1	1	1	1	1	1	1
RCC1_HUMAN	Regulator of chromosome condensation OS=Homo sapiens GN=RCC1 PE=1 SV=1	2.055	0.6462	0.003611	0	0	0	0	0	0	1	1	1	0	0	0	0	0	0	2	2	2	1	1	1	1	1	1	3	3	3	0	0	0	0	0	0	3	3	3	0	0	0	0	0	0	2	2	2
TSN11_HUMAN	Tetraspanin-11 OS=Homo sapiens GN=TSPAN11 PE=2 SV=2	1.35	0.1809	0.946048	0	0	0	0	0	0	0	0	0	1	1	1	0	0	0	0	0	0	0	0	0	0	0	0	0	0	0	1	1	1	0	0	0	0	0	0	0	0	0	0	0	0	0	0	0
RL19_HUMAN	60S ribosomal protein L19 OS=Homo sapiens GN=RPL19 PE=1 SV=1	2.252	0.6292	0.024956	1	1	1	0	0	0	1	1	1	1	1	1	0	0	0	0	0	0	0	0	0	1	1	1	1	1	1	2	2	2	1	1	1	1	1	1	1	1	1	1	1	1	1	1	1
TRIM4_HUMAN	Tripartite motif-containing protein 4 OS=Homo sapiens GN=TRIM4 PE=2 SV=2	1.737	0.3656	0.352816	0	0	0	1	1	1	1	1	1	0	0	0	0	0	0	0	0	0	0	0	0	0	0	0	0	0	0	0	0	0	0	0	0	0	0	0	0	0	0	0	0	0	0	0	0
LGUL_HUMAN	Lactoylglutathione lyase OS=Homo sapiens GN=GLO1 PE=1 SV=4	1.407	0.2822	0.308817	1	1	1	0	0	0	1	1	1	0	0	0	0	0	0	1	1	1	0	0	0	0	0	0	0	0	0	0	0	0	0	0	0	0	0	0	0	0	0	0	0	0	0	0	0
NOMO1_HUMAN	Nodal modulator 1 OS=Homo sapiens GN=NOMO1 PE=1 SV=5	2.06	0.5287	0.237306	2	2	0	0	0	0	0	0	0	1	1	0	0	0	0	2	2	0	0	0	0	0	0	0	1	1	0	0	0	0	0	0	0	0	0	0	0	0	0	0	0	0	0	0	0
MTA3_HUMAN	Metastasis-associated protein MTA3 OS=Homo sapiens GN=MTA3 PE=1 SV=2	1.363	0.1981	1.04049	1	1	0	0	0	0	0	0	0	0	0	0	0	0	0	0	0	0	0	0	0	0	0	0	0	0	0	0	0	0	0	0	0	0	0	0	0	0	0	0	0	0	0	0	0
ESRP2_HUMAN	Epithelial splicing regulatory protein 2 OS=Homo sapiens GN=ESRP2 PE=1 SV=1	1.122	0.1943	0.810135	0	0	0	0	0	0	0	0	0	1	1	1	0	0	0	0	0	0	0	0	0	0	0	0	0	0	0	0	0	0	0	0	0	0	0	0	0	0	0	0	0	0	0	0	0
IF2B2_HUMAN	Insulin-like growth factor 2 mRNA-binding protein 2 OS=Homo sapiens GN=IGF2BP2 PE=1 SV=2	1.956	0.4853	0.290731	1	1	0	0	0	0	0	0	0	1	1	0	0	0	0	0	0	0	0	0	0	0	0	0	0	0	0	0	0	0	0	0	0	0	0	0	0	0	0	0	0	0	0	0	0
GNAT1_HUMAN	Guanine nucleotide-binding protein G(t) subunit alpha-1 OS=Homo sapiens GN=GNAT1 PE=1 SV=5	2.329	0.5987	0.003423	1	1	0	1	1	0	0	0	0	1	1	0	0	0	0	1	1	0	0	0	0	0	0	0	0	0	0	0	0	0	0	0	0	0	0	0	1	1	0	0	0	0	0	0	0
IF4H_HUMAN	Eukaryotic translation initiation factor 4H OS=Homo sapiens GN=EIF4H PE=1 SV=5	1.917	0.6356	0.062083	2	2	2	0	0	0	2	2	2	0	0	0	1	1	1	3	3	3	1	1	1	0	0	0	1	1	1	0	0	0	0	0	0	0	0	0	1	1	1	0	0	0	1	1	1
K2C73_HUMAN	Keratin, type II cytoskeletal 73 OS=Homo sapiens GN=KRT73 PE=1 SV=1	2.788	0.7299	0.001668	5	4	0	10	2	0	6	3	0	8	5	0	17	4	0	9	4	0	39	3	0	18	4	0	14	3	0	14	3	0	29	5	0	10	3	0	11	3	0	18	3	0	11	2	0
K2C74_HUMAN	Keratin, type II cytoskeletal 74 OS=Homo sapiens GN=KRT74 PE=1 SV=2	2.788	0.7299	0.001668	5	4	0	10	2	0	6	3	0	8	5	0	16	3	0	9	4	0	39	3	0	18	4	0	14	3	0	14	3	0	28	4	0	10	3	0	11	3	0	18	3	0	11	2	0
SUGT1_HUMAN	Suppressor of G2 allele of SKP1 homolog OS=Homo sapiens GN=SUGT1 PE=1 SV=3	2.187	0.5379	0.06198	3	3	3	1	1	1	1	1	1	1	1	1	0	0	0	2	2	2	0	0	0	0	0	0	2	2	2	1	1	1	0	0	0	1	1	1	1	1	1	1	1	1	1	1	1
MCM6_HUMAN	DNA replication licensing factor MCM6 OS=Homo sapiens GN=MCM6 PE=1 SV=1	3.962	0.7214	0.010531	8	8	8	4	4	4	7	7	7	8	8	8	5	5	5	8	8	8	2	2	2	4	4	4	6	6	6	4	4	4	1	1	1	7	7	7	7	7	7	3	3	3	4	4	4
KCY_HUMAN	UMP-CMP kinase OS=Homo sapiens GN=CMPK1 PE=1 SV=3	2.102	0.6437	0.009039	1	1	1	0	0	0	1	1	1	2	2	2	0	0	0	2	2	2	1	1	1	0	0	0	2	2	2	2	2	2	0	0	0	0	0	0	2	2	2	0	0	0	0	0	0
LIMS2_HUMAN	LIM and senescent cell antigen-like-containing domain protein 2 OS=Homo sapiens GN=LIMS2 PE=1 SV=1	1.197	0.2289	1.52371	0	0	0	0	0	0	0	0	0	0	0	0	0	0	0	0	0	0	0	0	0	0	0	0	0	0	0	0	0	0	0	0	0	0	0	0	1	1	0	0	0	0	0	0	0
STA5B_HUMAN	Signal transducer and activator of transcription 5B OS=Homo sapiens GN=STAT5B PE=1 SV=2	2.103	0.6143	0.023314	3	3	0	0	0	0	1	1	0	2	2	0	2	2	0	3	3	0	0	0	0	0	0	0	4	4	0	0	0	0	1	1	0	1	1	0	1	1	0	0	0	0	2	2	0
STA5A_HUMAN	Signal transducer and activator of transcription 5A OS=Homo sapiens GN=STAT5A PE=1 SV=1	2.103	0.6143	0.023314	3	3	0	0	0	0	1	1	0	2	2	0	2	2	0	3	3	0	0	0	0	0	0	0	4	4	0	0	0	0	1	1	0	1	1	0	1	1	0	0	0	0	2	2	0
K2C71_HUMAN	Keratin, type II cytoskeletal 71 OS=Homo sapiens GN=KRT71 PE=1 SV=3	2.788	0.7299	0.001668	5	4	0	10	2	0	6	3	0	8	5	0	17	4	0	9	4	0	39	3	0	18	4	0	14	3	0	14	3	0	29	5	0	10	3	0	13	5	2	18	3	0	11	2	0
P5CR2_HUMAN	Pyrroline-5-carboxylate reductase 2 OS=Homo sapiens GN=PYCR2 PE=1 SV=1	1.188	0.4175	0.010382	0	0	0	0	0	0	0	0	0	0	0	0	0	0	0	0	0	0	0	0	0	0	0	0	0	0	0	0	0	0	0	0	0	0	0	0	0	0	0	0	0	0	0	0	0
AK1C3_HUMAN	Aldo-keto reductase family 1 member C3 OS=Homo sapiens GN=AKR1C3 PE=1 SV=4	2.311	0.5306	0.309381	2	2	0	0	0	0	2	2	0	1	1	0	0	0	0	1	1	0	0	0	0	0	0	0	1	1	0	0	0	0	0	0	0	0	0	0	0	0	0	0	0	0	0	0	0
UBP24_HUMAN	Ubiquitin carboxyl-terminal hydrolase 24 OS=Homo sapiens GN=USP24 PE=1 SV=3	1.357	0.3471	0.133678	0	0	0	0	0	0	0	0	0	0	0	0	0	0	0	1	1	1	0	0	0	0	0	0	0	0	0	0	0	0	0	0	0	1	1	1	0	0	0	0	0	0	0	0	0
FLNC_HUMAN	Filamin-C OS=Homo sapiens GN=FLNC PE=1 SV=3	2.981	0.7126	0.000361	16	16	6	11	8	2	17	13	3	14	12	2	14	10	2	14	12	3	9	7	1	12	9	3	14	13	5	12	8	1	9	7	1	13	10	2	16	11	2	8	6	1	12	10	3
FABP5_HUMAN	Fatty acid-binding protein, epidermal OS=Homo sapiens GN=FABP5 PE=1 SV=3	2.14	0.5835	0.097888	0	0	0	0	0	0	2	2	2	0	0	0	1	1	1	1	1	1	2	2	2	2	2	2	2	2	2	2	2	2	0	0	0	0	0	0	1	1	1	1	1	1	0	0	0
NOMO3_HUMAN	Nodal modulator 3 OS=Homo sapiens GN=NOMO3 PE=2 SV=2	2.06	0.5287	0.237306	2	2	0	0	0	0	0	0	0	1	1	0	0	0	0	2	2	0	0	0	0	0	0	0	1	1	0	0	0	0	0	0	0	0	0	0	0	0	0	0	0	0	0	0	0
ZN770_HUMAN	Zinc finger protein 770 OS=Homo sapiens GN=ZNF770 PE=2 SV=1	1.131	0.2202	2.43243	0	0	0	0	0	0	0	0	0	0	0	0	0	0	0	0	0	0	0	0	0	0	0	0	0	0	0	0	0	0	0	0	0	0	0	0	1	1	1	0	0	0	0	0	0
RHEB_HUMAN	GTP-binding protein Rheb OS=Homo sapiens GN=RHEB PE=1 SV=1	2.092	0.5608	0.099594	2	2	2	0	0	0	1	1	1	2	2	2	0	0	0	1	1	1	0	0	0	0	0	0	0	0	0	0	0	0	0	0	0	0	0	0	1	1	1	0	0	0	0	0	0
SYDC_HUMAN	Aspartate--tRNA ligase, cytoplasmic OS=Homo sapiens GN=DARS PE=1 SV=2	3.315	0.7555	0.009417	28	24	24	22	20	20	28	22	22	4	4	4	1	1	1	6	6	6	1	1	1	2	2	2	7	7	7	3	3	3	2	2	2	3	3	3	3	3	3	0	0	0	4	4	4
RECQ1_HUMAN	ATP-dependent DNA helicase Q1 OS=Homo sapiens GN=RECQL PE=1 SV=3	2.291	0.654	0.051294	2	2	2	1	1	1	2	2	2	3	3	3	1	1	1	2	2	2	0	0	0	2	2	2	2	2	2	2	2	2	0	0	0	1	1	1	2	2	2	1	1	1	0	0	0
UCHL5_HUMAN	Ubiquitin carboxyl-terminal hydrolase isozyme L5 OS=Homo sapiens GN=UCHL5 PE=1 SV=3	1.978	0.5277	0.189249	3	3	3	1	1	1	1	1	1	0	0	0	0	0	0	2	2	2	0	0	0	0	0	0	0	0	0	1	1	1	0	0	0	0	0	0	0	0	0	0	0	0	0	0	0
DOPD_HUMAN	D-dopachrome decarboxylase OS=Homo sapiens GN=DDT PE=1 SV=3	1.8	0.2966	0.678201	0	0	0	0	0	0	0	0	0	1	1	0	0	0	0	0	0	0	0	0	0	0	0	0	0	0	0	0	0	0	0	0	0	0	0	0	1	1	0	0	0	0	0	0	0
GLCM_HUMAN	Glucosylceramidase OS=Homo sapiens GN=GBA PE=1 SV=3	1.663	0.5881	0.122408	1	1	1	0	0	0	0	0	0	1	1	1	0	0	0	0	0	0	0	0	0	0	0	0	0	0	0	0	0	0	0	0	0	0	0	0	0	0	0	0	0	0	0	0	0
SMRC1_HUMAN	SWI/SNF complex subunit SMARCC1 OS=Homo sapiens GN=SMARCC1 PE=1 SV=3	2.41	0.4736	0.017669	2	2	1	0	0	0	1	1	0	0	0	0	0	0	0	0	0	0	0	0	0	0	0	0	2	2	1	0	0	0	0	0	0	1	1	1	0	0	0	0	0	0	0	0	0
ERLN2_HUMAN	Erlin-2 OS=Homo sapiens GN=ERLIN2 PE=1 SV=1	1.775	0.609	0.028262	0	0	0	1	1	0	0	0	0	1	1	0	0	0	0	0	0	0	0	0	0	0	0	0	0	0	0	0	0	0	0	0	0	0	0	0	1	1	0	0	0	0	0	0	0
IF4A1_HUMAN	Eukaryotic initiation factor 4A-I OS=Homo sapiens GN=EIF4A1 PE=1 SV=1	3.621	0.7591	0.003483	19	14	7	5	5	1	16	14	6	17	14	7	3	3	1	17	14	7	2	2	0	6	5	1	13	12	5	4	4	1	2	2	0	7	7	2	12	10	4	2	2	0	4	4	0
RD23A_HUMAN	UV excision repair protein RAD23 homolog A OS=Homo sapiens GN=RAD23A PE=1 SV=1	1.917	0.5225	0.018638	2	2	0	1	1	0	2	2	0	3	3	1	1	1	0	2	2	0	1	1	0	1	1	0	2	2	0	1	1	0	2	2	0	0	0	0	1	1	0	1	1	0	2	2	0
IMDH2_HUMAN	Inosine-5'-monophosphate dehydrogenase 2 OS=Homo sapiens GN=IMPDH2 PE=1 SV=2	5.129	0.823	0.010379	15	13	13	8	8	7	17	15	15	9	8	8	6	6	5	10	10	10	3	3	3	4	4	4	6	6	6	4	4	3	4	4	3	6	6	6	5	4	4	5	5	4	5	5	4
HMGA1_HUMAN	High mobility group protein HMG-I/HMG-Y OS=Homo sapiens GN=HMGA1 PE=1 SV=3	1.589	0.2876	1.14998	0	0	0	0	0	0	0	0	0	0	0	0	0	0	0	0	0	0	0	0	0	0	0	0	0	0	0	0	0	0	0	0	0	1	1	1	0	0	0	0	0	0	0	0	0
OSTF1_HUMAN	Osteoclast-stimulating factor 1 OS=Homo sapiens GN=OSTF1 PE=1 SV=2	1.347	0.5063	0.2525	0	0	0	0	0	0	0	0	0	0	0	0	0	0	0	0	0	0	0	0	0	0	0	0	0	0	0	0	0	0	0	0	0	0	0	0	0	0	0	0	0	0	0	0	0
SYG_HUMAN	Glycine--tRNA ligase OS=Homo sapiens GN=GARS PE=1 SV=3	2.71	0.6199	0.010701	8	8	8	2	2	2	4	4	4	5	5	5	6	6	6	7	7	7	3	3	3	4	4	4	4	4	4	6	6	6	1	1	1	6	6	6	7	7	7	2	2	2	3	3	3
CNKR2_HUMAN	Connector enhancer of kinase suppressor of ras 2 OS=Homo sapiens GN=CNKSR2 PE=1 SV=1	1.031	0.2464	0.232941	0	0	0	0	0	0	0	0	0	0	0	0	0	0	0	1	1	1	0	0	0	0	0	0	0	0	0	0	0	0	0	0	0	0	0	0	0	0	0	0	0	0	0	0	0
IGHA1_HUMAN	Ig alpha-1 chain C region OS=Homo sapiens GN=IGHA1 PE=1 SV=2	1.964	0.5728	0.787272	0	0	0	0	0	0	0	0	0	0	0	0	1	1	1	0	0	0	0	0	0	0	0	0	0	0	0	0	0	0	0	0	0	0	0	0	0	0	0	0	0	0	0	0	0
PUR9_HUMAN	Bifunctional purine biosynthesis protein PURH OS=Homo sapiens GN=ATIC PE=1 SV=3	3.05	0.7035	0.000533	5	5	5	0	0	0	5	5	5	6	6	6	4	4	4	7	7	7	2	2	2	0	0	0	4	4	4	3	3	3	1	1	1	4	4	4	4	4	4	0	0	0	2	2	2
GCP60_HUMAN	Golgi resident protein GCP60 OS=Homo sapiens GN=ACBD3 PE=1 SV=4	1.93	0.6757	0.233012	2	2	2	0	0	0	1	1	1	1	1	1	0	0	0	1	1	1	0	0	0	0	0	0	1	1	1	0	0	0	0	0	0	0	0	0	0	0	0	0	0	0	0	0	0
POTEE_HUMAN	POTE ankyrin domain family member E OS=Homo sapiens GN=POTEE PE=1 SV=3	3.895	0.8069	0.001569	21	4	0	24	4	0	23	5	0	37	4	0	26	4	0	27	4	0	36	3	0	21	4	0	21	4	0	27	4	0	10	4	0	19	4	0	37	4	0	23	4	0	15	3	0
POTEF_HUMAN	POTE ankyrin domain family member F OS=Homo sapiens GN=POTEF PE=1 SV=2	3.895	0.8069	0.001569	21	4	0	24	4	0	23	5	0	37	4	0	26	4	0	27	4	0	36	3	0	21	4	0	21	4	0	27	4	0	10	4	0	19	4	0	37	4	0	23	4	0	15	3	0
SURF1_HUMAN	Surfeit locus protein 1 OS=Homo sapiens GN=SURF1 PE=1 SV=1	1.087	0.333	1.1291	0	0	0	0	0	0	0	0	0	1	1	1	0	0	0	0	0	0	0	0	0	0	0	0	0	0	0	0	0	0	0	0	0	0	0	0	0	0	0	0	0	0	0	0	0
PIPSL_HUMAN	Putative PIP5K1A and PSMD4-like protein OS=Homo sapiens GN=PIPSL PE=5 SV=1	1.935	0.5747	0.866653	1	1	0	0	0	0	0	0	0	0	0	0	0	0	0	0	0	0	0	0	0	0	0	0	0	0	0	0	0	0	0	0	0	0	0	0	0	0	0	0	0	0	0	0	0
PAK6_HUMAN	Serine/threonine-protein kinase PAK 6 OS=Homo sapiens GN=PAK6 PE=1 SV=1	1.027	0.3067	4.33493	0	0	0	0	0	0	0	0	0	0	0	0	0	0	0	0	0	0	0	0	0	0	0	0	0	0	0	0	0	0	0	0	0	0	0	0	0	0	0	0	0	0	0	0	0
XPOT_HUMAN	Exportin-T OS=Homo sapiens GN=XPOT PE=1 SV=2	1.686	0.7023	0.089607	3	3	3	0	0	0	1	1	1	1	1	1	0	0	0	1	1	1	0	0	0	0	0	0	0	0	0	0	0	0	0	0	0	0	0	0	1	1	1	0	0	0	0	0	0
TBAL3_HUMAN	Tubulin alpha chain-like 3 OS=Homo sapiens GN=TUBAL3 PE=1 SV=2	3.743	0.5661	0.003303	8	5	0	2	2	0	7	5	0	5	3	0	3	3	0	5	3	0	8	2	0	4	2	0	4	2	0	8	2	0	2	2	0	4	2	0	5	3	0	1	1	0	5	2	0
VAT1_HUMAN	Synaptic vesicle membrane protein VAT-1 homolog OS=Homo sapiens GN=VAT1 PE=1 SV=2	1.846	0.6307	0.129425	1	1	1	0	0	0	0	0	0	2	2	2	0	0	0	2	2	2	0	0	0	0	0	0	1	1	1	0	0	0	0	0	0	0	0	0	0	0	0	0	0	0	0	0	0
CDSN_HUMAN	Corneodesmosin OS=Homo sapiens GN=CDSN PE=1 SV=3	1.75	0.6251	0.022733	0	0	0	0	0	0	0	0	0	0	0	0	0	0	0	0	0	0	0	0	0	0	0	0	0	0	0	0	0	0	0	0	0	0	0	0	0	0	0	0	0	0	0	0	0
DPP3_HUMAN	Dipeptidyl peptidase 3 OS=Homo sapiens GN=DPP3 PE=1 SV=2	1.43	0.4538	0.685447	1	1	1	0	0	0	0	0	0	0	0	0	0	0	0	0	0	0	0	0	0	0	0	0	0	0	0	0	0	0	0	0	0	0	0	0	1	1	1	0	0	0	0	0	0
GRP78_HUMAN	78 kDa glucose-regulated protein OS=Homo sapiens GN=HSPA5 PE=1 SV=2	4.039	0.7838	0.004716	142	49	48	72	37	36	109	52	51	51	28	27	33	20	19	52	30	29	27	13	12	29	18	17	41	24	23	38	23	22	21	17	17	31	22	21	52	28	27	26	18	17	33	21	20
POTEJ_HUMAN	POTE ankyrin domain family member J OS=Homo sapiens GN=POTEJ PE=3 SV=1	3.895	0.6838	0.001569	7	2	0	11	2	0	8	3	0	10	2	0	14	2	0	9	2	0	29	2	0	17	2	0	10	2	0	19	2	0	6	2	0	12	2	0	21	2	0	18	2	0	13	2	0
PSA6_HUMAN	Proteasome subunit alpha type-6 OS=Homo sapiens GN=PSMA6 PE=1 SV=1	2.935	0.6288	0.023016	7	7	7	4	4	4	7	7	7	5	5	5	3	3	3	3	3	3	2	2	2	3	3	3	4	4	4	3	3	3	1	1	1	3	3	3	4	4	4	3	2	2	3	3	3
COPB_HUMAN	Coatomer subunit beta OS=Homo sapiens GN=COPB1 PE=1 SV=3	2.742	0.6416	0.002504	7	7	7	5	4	4	5	5	5	6	6	6	0	0	0	4	4	4	0	0	0	0	0	0	2	2	2	1	1	1	1	1	1	1	1	1	1	1	1	0	0	0	1	1	1
FWCH2_HUMAN	FLYWCH family member 2 OS=Homo sapiens GN=FLYWCH2 PE=1 SV=1	1.678	0.4416	0.521983	1	1	1	0	0	0	0	0	0	0	0	0	0	0	0	0	0	0	0	0	0	0	0	0	1	1	1	0	0	0	0	0	0	0	0	0	0	0	0	0	0	0	0	0	0
LRC59_HUMAN	Leucine-rich repeat-containing protein 59 OS=Homo sapiens GN=LRRC59 PE=1 SV=1	2.37	0.5969	0.01452	0	0	0	0	0	0	2	2	2	3	3	3	0	0	0	1	1	1	1	1	1	0	0	0	2	2	2	0	0	0	0	0	0	0	0	0	2	2	2	1	1	1	0	0	0
CDK17_HUMAN	Cyclin-dependent kinase 17 OS=Homo sapiens GN=CDK17 PE=1 SV=2	2.193	0.5481	0.256957	2	1	0	1	1	0	1	1	0	1	1	0	1	1	0	1	1	0	0	0	0	1	1	0	1	1	0	1	1	0	1	1	0	1	1	0	1	1	0	0	0	0	1	1	0
CCAR1_HUMAN	Cell division cycle and apoptosis regulator protein 1 OS=Homo sapiens GN=CCAR1 PE=1 SV=2	1.689	0.5543	0.306741	1	1	1	2	2	2	2	2	2	0	0	0	0	0	0	2	2	2	0	0	0	0	0	0	2	2	2	1	1	1	0	0	0	0	0	0	0	0	0	0	0	0	0	0	0
TB182_HUMAN	182 kDa tankyrase-1-binding protein OS=Homo sapiens GN=TNKS1BP1 PE=1 SV=4	1.407	0.4314	0.316512	1	1	1	0	0	0	0	0	0	0	0	0	0	0	0	0	0	0	0	0	0	0	0	0	0	0	0	0	0	0	0	0	0	0	0	0	0	0	0	0	0	0	0	0	0
LOXE3_HUMAN	Epidermis-type lipoxygenase 3 OS=Homo sapiens GN=ALOXE3 PE=1 SV=1	1.682	0.2262	0.207375	0	0	0	0	0	0	0	0	0	0	0	0	0	0	0	0	0	0	0	0	0	0	0	0	0	0	0	0	0	0	0	0	0	0	0	0	0	0	0	0	0	0	0	0	0
TBR1_HUMAN	T-box brain protein 1 OS=Homo sapiens GN=TBR1 PE=1 SV=1	1.477	0.3846	0.336557	0	0	0	0	0	0	1	1	1	0	0	0	0	0	0	0	0	0	0	0	0	0	0	0	0	0	0	0	0	0	0	0	0	0	0	0	0	0	0	0	0	0	0	0	0
RMXL3_HUMAN	RNA-binding motif protein, X-linked-like-3 OS=Homo sapiens GN=RBMXL3 PE=2 SV=2	2.634	0.7133	0.206912	1	1	0	0	0	0	1	1	0	1	1	0	0	0	0	2	1	0	0	0	0	0	0	0	1	1	0	0	0	0	0	0	0	1	1	0	0	0	0	0	0	0	0	0	0
GFPT1_HUMAN	Glutamine--fructose-6-phosphate aminotransferase [isomerizing] 1 OS=Homo sapiens GN=GFPT1 PE=1 SV=3	2.574	0.6398	0.031133	3	3	2	0	0	0	1	1	1	3	3	3	0	0	0	1	1	1	0	0	0	0	0	0	0	0	0	2	2	2	0	0	0	0	0	0	2	2	2	0	0	0	0	0	0
IMPG2_HUMAN	Interphotoreceptor matrix proteoglycan 2 OS=Homo sapiens GN=IMPG2 PE=1 SV=3	1.119	0.2073	0.74922	0	0	0	0	0	0	0	0	0	1	1	1	0	0	0	0	0	0	0	0	0	0	0	0	0	0	0	0	0	0	0	0	0	0	0	0	0	0	0	0	0	0	0	0	0
BRE_HUMAN	BRCA1-A complex subunit BRE OS=Homo sapiens GN=BRE PE=1 SV=2	1.179	0.2527	0.923767	0	0	0	0	0	0	1	1	1	0	0	0	0	0	0	1	1	1	0	0	0	0	0	0	0	0	0	0	0	0	0	0	0	0	0	0	0	0	0	0	0	0	0	0	0
ZSWM8_HUMAN	Zinc finger SWIM domain-containing protein 8 OS=Homo sapiens GN=ZSWIM8 PE=1 SV=1	0.699	0.3076	0.186883	1	1	1	0	0	0	0	0	0	0	0	0	0	0	0	0	0	0	0	0	0	0	0	0	0	0	0	0	0	0	0	0	0	0	0	0	0	0	0	0	0	0	0	0	0
KLC1_HUMAN	Kinesin light chain 1 OS=Homo sapiens GN=KLC1 PE=1 SV=2	2.067	0.5764	0.023529	0	0	0	0	0	0	0	0	0	2	2	2	1	1	1	3	3	2	0	0	0	0	0	0	3	3	1	0	0	0	1	1	1	2	2	2	2	2	1	1	1	0	1	1	1
CCD78_HUMAN	Coiled-coil domain-containing protein 78 OS=Homo sapiens GN=CCDC78 PE=2 SV=1	1.645	0.2967	0.016825	0	0	0	0	0	0	0	0	0	0	0	0	0	0	0	0	0	0	0	0	0	1	1	1	1	1	1	0	0	0	0	0	0	0	0	0	0	0	0	0	0	0	1	1	1
EF1G_HUMAN	Elongation factor 1-gamma OS=Homo sapiens GN=EEF1G PE=1 SV=3	3.726	0.7544	0.000755	19	12	12	10	10	10	22	17	17	18	11	11	12	10	10	19	13	13	7	6	6	9	8	8	14	11	11	12	11	11	8	8	8	13	11	11	16	11	11	9	9	9	14	10	10
CDK9_HUMAN	Cyclin-dependent kinase 9 OS=Homo sapiens GN=CDK9 PE=1 SV=3	2.193	0.5481	0.256957	2	1	0	1	1	0	1	1	0	1	1	0	1	1	0	1	1	0	0	0	0	1	1	0	1	1	0	1	1	0	1	1	0	1	1	0	1	1	0	0	0	0	1	1	0
KIF11_HUMAN	Kinesin-like protein KIF11 OS=Homo sapiens GN=KIF11 PE=1 SV=2	2.317	0.6029	0.021793	3	3	3	0	0	0	3	3	3	2	2	2	0	0	0	1	1	1	0	0	0	2	2	2	1	1	1	1	1	1	1	1	1	1	1	1	2	2	2	0	0	0	1	1	1
CIRBP_HUMAN	Cold-inducible RNA-binding protein OS=Homo sapiens GN=CIRBP PE=1 SV=1	1.932	0.7635	0.025832	0	0	0	0	0	0	0	0	0	0	0	0	0	0	0	1	1	1	0	0	0	0	0	0	0	0	0	0	0	0	0	0	0	0	0	0	0	0	0	0	0	0	0	0	0
GUAA_HUMAN	GMP synthase [glutamine-hydrolyzing] OS=Homo sapiens GN=GMPS PE=1 SV=1	2.951	0.6753	0.003458	8	8	8	0	0	0	5	5	5	3	3	3	3	3	3	5	5	5	1	1	1	3	3	3	3	3	3	1	1	1	1	1	1	3	3	3	2	2	2	0	0	0	2	2	2
CHCH3_HUMAN	Coiled-coil-helix-coiled-coil-helix domain-containing protein 3, mitochondrial OS=Homo sapiens GN=CHCHD3 PE=1 SV=1	2.169	0.6041	0.016045	3	3	3	1	1	1	1	1	1	0	0	0	0	0	0	1	1	1	0	0	0	1	1	1	1	1	1	0	0	0	1	1	1	1	1	1	1	1	1	0	0	0	0	0	0
GELS_HUMAN	Gelsolin OS=Homo sapiens GN=GSN PE=1 SV=1	1.648	0.4848	0.676936	0	0	0	0	0	0	0	0	0	0	0	0	0	0	0	0	0	0	0	0	0	0	0	0	0	0	0	0	0	0	0	0	0	0	0	0	1	1	1	0	0	0	0	0	0
GLHA_HUMAN	Glycoprotein hormones alpha chain OS=Homo sapiens GN=CGA PE=1 SV=1	1.999	0.4997	0.016834	4	4	4	4	4	4	6	5	5	4	3	3	2	2	2	4	3	3	4	3	3	4	3	3	6	4	4	4	3	3	3	3	3	4	3	3	5	4	4	4	4	4	7	3	3
ULA1_HUMAN	NEDD8-activating enzyme E1 regulatory subunit OS=Homo sapiens GN=NAE1 PE=1 SV=1	2.159	0.5484	0.136222	0	0	0	0	0	0	0	0	0	0	0	0	1	1	1	1	1	1	1	1	1	1	1	1	0	0	0	1	1	1	0	0	0	0	0	0	1	1	1	0	0	0	0	0	0
AT1A1_HUMAN	Sodium/potassium-transporting ATPase subunit alpha-1 OS=Homo sapiens GN=ATP1A1 PE=1 SV=1	3.648	0.7567	0.00347	10	10	8	3	3	1	14	14	8	10	9	6	3	3	1	10	10	6	1	1	0	3	3	1	5	5	2	3	3	2	2	2	1	7	7	4	6	6	3	2	2	0	4	4	2
CDK14_HUMAN	Cyclin-dependent kinase 14 OS=Homo sapiens GN=CDK14 PE=1 SV=3	2.193	0.5481	0.256957	2	1	0	1	1	0	1	1	0	1	1	0	1	1	0	1	1	0	0	0	0	1	1	0	1	1	0	1	1	0	1	1	0	1	1	0	1	1	0	0	0	0	1	1	0
4F2_HUMAN	4F2 cell-surface antigen heavy chain OS=Homo sapiens GN=SLC3A2 PE=1 SV=3	3.699	0.7435	0.015864	13	13	13	3	3	3	17	16	16	9	8	8	5	5	5	12	11	11	1	1	1	4	4	4	10	10	10	4	4	4	3	3	3	9	8	8	8	8	8	2	2	2	4	4	4
CDK16_HUMAN	Cyclin-dependent kinase 16 OS=Homo sapiens GN=CDK16 PE=1 SV=1	2.193	0.5481	0.256957	2	1	0	1	1	0	1	1	0	1	1	0	1	1	0	1	1	0	0	0	0	1	1	0	1	1	0	1	1	0	1	1	0	1	1	0	1	1	0	0	0	0	1	1	0
CDK12_HUMAN	Cyclin-dependent kinase 12 OS=Homo sapiens GN=CDK12 PE=1 SV=2	2.193	0.5481	0.256957	2	1	0	1	1	0	1	1	0	1	1	0	1	1	0	1	1	0	0	0	0	1	1	0	1	1	0	1	1	0	1	1	0	1	1	0	1	1	0	0	0	0	1	1	0
RAB1A_HUMAN	Ras-related protein Rab-1A OS=Homo sapiens GN=RAB1A PE=1 SV=3	2.561	0.6839	0.012709	7	7	2	4	4	2	6	6	3	6	6	2	5	5	2	3	3	1	3	3	2	3	3	2	3	3	2	5	5	2	5	5	3	1	1	0	6	6	2	5	5	3	3	3	2
1A34_HUMAN	HLA class I histocompatibility antigen, A-34 alpha chain OS=Homo sapiens GN=HLA-A PE=1 SV=1	2.621	0.7085	0.054574	1	1	0	1	1	0	2	2	0	0	0	0	0	0	0	1	1	0	0	0	0	0	0	0	0	0	0	0	0	0	0	0	0	0	0	0	1	1	0	1	1	0	0	0	0
PYR1_HUMAN	CAD protein OS=Homo sapiens GN=CAD PE=1 SV=3	4.718	0.776	0.002455	32	30	26	22	22	19	37	33	30	21	18	15	10	10	7	23	19	16	4	4	3	13	12	9	19	17	14	12	12	9	5	5	5	17	16	13	16	13	10	3	3	2	13	12	9
SMC1B_HUMAN	Structural maintenance of chromosomes protein 1B OS=Homo sapiens GN=SMC1B PE=1 SV=2	1.382	0.3748	0.97314	0	0	0	0	0	0	0	0	0	1	1	1	0	0	0	0	0	0	0	0	0	0	0	0	0	0	0	0	0	0	0	0	0	0	0	0	1	1	1	0	0	0	0	0	0
DAF_HUMAN	Complement decay-accelerating factor OS=Homo sapiens GN=CD55 PE=1 SV=4	2.059	0.6724	0.063097	4	2	2	1	1	1	5	3	3	3	2	2	1	1	1	2	2	2	0	0	0	1	1	1	5	3	3	1	1	1	0	0	0	2	2	2	3	2	2	1	1	1	3	3	3
HV308_HUMAN	Ig heavy chain V-III region GA OS=Homo sapiens PE=1 SV=1	1.928	0.3422	0.00165	0	0	0	0	0	0	0	0	0	0	0	0	1	1	0	0	0	0	0	0	0	0	0	0	0	0	0	0	0	0	0	0	0	1	1	0	0	0	0	0	0	0	0	0	0
1A43_HUMAN	HLA class I histocompatibility antigen, A-43 alpha chain OS=Homo sapiens GN=HLA-A PE=2 SV=1	2.621	0.7085	0.054574	1	1	0	1	1	0	2	2	0	0	0	0	0	0	0	1	1	0	0	0	0	0	0	0	0	0	0	0	0	0	0	0	0	0	0	0	1	1	0	1	1	0	0	0	0
TIMP1_HUMAN	Metalloproteinase inhibitor 1 OS=Homo sapiens GN=TIMP1 PE=1 SV=1	1.804	0.4161	0.172738	1	1	1	0	0	0	0	0	0	0	0	0	0	0	0	0	0	0	0	0	0	0	0	0	1	1	1	0	0	0	0	0	0	1	1	1	0	0	0	0	0	0	0	0	0
TLE2_HUMAN	Transducin-like enhancer protein 2 OS=Homo sapiens GN=TLE2 PE=1 SV=2	1.283	0.5289	0.012832	1	1	0	0	0	0	1	1	0	0	0	0	0	0	0	0	0	0	0	0	0	0	0	0	0	0	0	0	0	0	0	0	0	0	0	0	0	0	0	0	0	0	0	0	0
BN3D2_HUMAN	Pre-miRNA 5'-monophosphate methyltransferase OS=Homo sapiens GN=BCDIN3D PE=1 SV=1	1.338	0.3356	0.601561	0	0	0	0	0	0	1	1	1	0	0	0	0	0	0	1	1	1	0	0	0	1	1	1	0	0	0	0	0	0	0	0	0	1	1	1	0	0	0	0	0	0	0	0	0
AAR2_HUMAN	Protein AAR2 homolog OS=Homo sapiens GN=AAR2 PE=1 SV=2	1.475	0.2549	2.08359	0	0	0	0	0	0	0	0	0	0	0	0	0	0	0	0	0	0	0	0	0	0	0	0	0	0	0	0	0	0	0	0	0	0	0	0	0	0	0	0	0	0	0	0	0
MYH3_HUMAN	Myosin-3 OS=Homo sapiens GN=MYH3 PE=1 SV=3	1.991	0.3014	0.224977	0	0	0	0	0	0	0	0	0	0	0	0	0	0	0	0	0	0	1	1	0	0	0	0	0	0	0	0	0	0	0	0	0	0	0	0	0	0	0	0	0	0	0	0	0
CDC37_HUMAN	Hsp90 co-chaperone Cdc37 OS=Homo sapiens GN=CDC37 PE=1 SV=1	2.379	0.6496	0.016809	5	5	5	2	2	2	3	3	3	3	3	3	1	1	1	4	4	4	2	2	2	3	3	3	3	3	3	2	2	2	1	1	1	3	3	3	2	2	2	4	4	4	2	2	2
MBNL2_HUMAN	Muscleblind-like protein 2 OS=Homo sapiens GN=MBNL2 PE=1 SV=2	1.556	0.2924	0.632525	0	0	0	0	0	0	0	0	0	0	0	0	0	0	0	0	0	0	0	0	0	0	0	0	1	1	0	0	0	0	0	0	0	0	0	0	0	0	0	0	0	0	0	0	0
K6PL_HUMAN	6-phosphofructokinase, liver type OS=Homo sapiens GN=PFKL PE=1 SV=6	2.271	0.7244	0.013905	2	2	0	1	1	0	2	2	0	1	1	0	1	1	0	2	2	1	1	1	0	1	1	0	2	2	1	2	1	0	1	1	0	1	1	0	2	1	0	1	1	0	1	1	0
MUC15_HUMAN	Mucin-15 OS=Homo sapiens GN=MUC15 PE=2 SV=2	1.6	0.2781	0.525533	0	0	0	1	1	1	0	0	0	0	0	0	0	0	0	0	0	0	0	0	0	0	0	0	0	0	0	0	0	0	0	0	0	0	0	0	0	0	0	0	0	0	0	0	0
ACTB_HUMAN	Actin, cytoplasmic 1 OS=Homo sapiens GN=ACTB PE=1 SV=1	5.075	0.8069	0.00017	62	20	0	68	20	0	66	25	0	82	21	0	66	18	0	72	22	0	113	14	0	68	17	0	66	20	0	83	17	0	42	17	0	56	20	0	91	21	0	68	17	0	58	15	0
ACTG_HUMAN	Actin, cytoplasmic 2 OS=Homo sapiens GN=ACTG1 PE=1 SV=1	5.075	0.8069	0.00017	62	20	0	68	20	0	66	25	0	82	21	0	66	18	0	72	22	0	113	14	0	68	17	0	66	20	0	83	17	0	42	17	0	56	20	0	91	21	0	68	17	0	58	15	0
EIF3I_HUMAN	Eukaryotic translation initiation factor 3 subunit I OS=Homo sapiens GN=EIF3I PE=1 SV=1	3.832	0.7675	0.057307	6	5	5	4	4	4	6	6	6	4	3	3	2	2	2	5	4	4	0	0	0	2	2	2	5	4	4	2	2	2	3	3	3	3	3	3	5	5	5	2	2	2	3	3	3
STMN4_HUMAN	Stathmin-4 OS=Homo sapiens GN=STMN4 PE=2 SV=1	2.462	0.264	0.175409	1	1	0	0	0	0	1	1	0	1	1	0	0	0	0	2	2	0	0	0	0	0	0	0	0	0	0	1	1	0	0	0	0	1	1	0	0	0	0	0	0	0	1	1	0
EXOS6_HUMAN	Exosome complex component MTR3 OS=Homo sapiens GN=EXOSC6 PE=1 SV=1	2.489	0.7212	0.092934	1	1	1	0	0	0	1	1	1	1	1	1	0	0	0	1	1	1	0	0	0	0	0	0	1	1	1	0	0	0	0	0	0	0	0	0	1	1	1	0	0	0	0	0	0
AK1A1_HUMAN	Alcohol dehydrogenase [NADP(+)] OS=Homo sapiens GN=AKR1A1 PE=1 SV=3	1.739	0.3859	0.242121	0	0	0	0	0	0	0	0	0	0	0	0	0	0	0	0	0	0	0	0	0	0	0	0	0	0	0	0	0	0	0	0	0	0	0	0	1	1	1	0	0	0	0	0	0
KYNU_HUMAN	Kynureninase OS=Homo sapiens GN=KYNU PE=1 SV=1	4.087	0.722	0.013368	5	4	4	1	1	1	6	5	5	1	1	1	3	3	3	5	5	5	0	0	0	1	1	1	2	2	2	0	0	0	0	0	0	3	3	3	3	3	3	0	0	0	1	1	1
ECH1_HUMAN	Delta(3,5)-Delta(2,4)-dienoyl-CoA isomerase, mitochondrial OS=Homo sapiens GN=ECH1 PE=1 SV=2	2.435	0.4725	0.021366	1	1	1	0	0	0	2	2	2	0	0	0	0	0	0	1	1	1	0	0	0	1	1	1	0	0	0	0	0	0	1	1	1	1	1	1	0	0	0	1	1	1	1	1	1
SCPDL_HUMAN	Saccharopine dehydrogenase-like oxidoreductase OS=Homo sapiens GN=SCCPDH PE=1 SV=1	1.862	0.551	1.06422	0	0	0	0	0	0	0	0	0	0	0	0	0	0	0	0	0	0	0	0	0	0	0	0	0	0	0	0	0	0	0	0	0	0	0	0	0	0	0	0	0	0	0	0	0
RD23B_HUMAN	UV excision repair protein RAD23 homolog B OS=Homo sapiens GN=RAD23B PE=1 SV=1	2.043	0.5294	0.018638	5	5	3	3	3	2	5	5	3	4	4	2	3	3	2	5	5	3	2	2	1	3	3	2	5	5	3	3	3	2	3	3	1	2	2	2	3	3	2	2	2	1	4	4	2
RTN3_HUMAN	Reticulon-3 OS=Homo sapiens GN=RTN3 PE=1 SV=2	2.243	0.527	0.085348	0	0	0	1	1	1	2	1	1	0	0	0	0	0	0	1	1	1	0	0	0	0	0	0	1	1	1	0	0	0	0	0	0	0	0	0	1	1	1	0	0	0	0	0	0
MARE1_HUMAN	Microtubule-associated protein RP/EB family member 1 OS=Homo sapiens GN=MAPRE1 PE=1 SV=3	2.669	0.7122	0.010572	7	7	5	1	1	1	4	3	3	6	6	5	2	2	2	8	7	5	0	0	0	3	3	2	3	3	3	4	4	3	0	0	0	4	4	3	4	4	3	3	3	2	2	2	2
XPP1_HUMAN	Xaa-Pro aminopeptidase 1 OS=Homo sapiens GN=XPNPEP1 PE=1 SV=3	1.419	0.6284	0.051149	1	1	1	0	0	0	0	0	0	0	0	0	0	0	0	1	1	1	0	0	0	0	0	0	0	0	0	0	0	0	0	0	0	0	0	0	0	0	0	0	0	0	0	0	0
DJB12_HUMAN	DnaJ homolog subfamily B member 12 OS=Homo sapiens GN=DNAJB12 PE=1 SV=4	2.224	0.6048	0.207092	3	3	3	0	0	0	0	0	0	1	1	1	0	0	0	0	0	0	0	0	0	0	0	0	0	0	0	0	0	0	0	0	0	0	0	0	1	1	1	0	0	0	0	0	0
1A80_HUMAN	HLA class I histocompatibility antigen, A-80 alpha chain OS=Homo sapiens GN=HLA-A PE=2 SV=1	2.621	0.7085	0.423033	2	2	0	0	0	0	1	1	0	0	0	0	0	0	0	0	0	0	0	0	0	0	0	0	0	0	0	0	0	0	0	0	0	0	0	0	0	0	0	0	0	0	0	0	0
CBR1_HUMAN	Carbonyl reductase [NADPH] 1 OS=Homo sapiens GN=CBR1 PE=1 SV=3	3.606	0.7855	0.000514	4	3	2	0	0	0	2	2	0	2	2	1	0	0	0	4	4	3	0	0	0	0	0	0	2	2	1	1	1	1	0	0	0	2	2	2	4	3	2	0	0	0	0	0	0
AAMP_HUMAN	Angio-associated migratory cell protein OS=Homo sapiens GN=AAMP PE=1 SV=2	2.351	0.6661	0.049491	0	0	0	0	0	0	1	1	1	2	2	2	0	0	0	2	2	2	0	0	0	0	0	0	4	4	4	0	0	0	0	0	0	1	1	1	2	2	2	1	1	1	0	0	0
TMED9_HUMAN	Transmembrane emp24 domain-containing protein 9 OS=Homo sapiens GN=TMED9 PE=1 SV=2	2.061	0.2411	0.260197	0	0	0	0	0	0	1	1	1	0	0	0	1	1	1	1	1	1	0	0	0	0	0	0	0	0	0	1	1	1	0	0	0	0	0	0	0	0	0	0	0	0	0	0	0
CNN1_HUMAN	Calponin-1 OS=Homo sapiens GN=CNN1 PE=1 SV=2	1.489	0.3357	0.149379	1	1	0	0	0	0	1	1	0	1	1	0	1	1	0	0	0	0	0	0	0	0	0	0	0	0	0	1	1	0	0	0	0	1	1	0	1	1	0	0	0	0	0	0	0
LV102_HUMAN	Ig lambda chain V-I region HA OS=Homo sapiens PE=1 SV=1	1.952	0.3827	0.135397	0	0	0	1	1	0	0	0	0	0	0	0	0	0	0	0	0	0	0	0	0	0	0	0	0	0	0	0	0	0	0	0	0	0	0	0	0	0	0	0	0	0	0	0	0
RPR1B_HUMAN	Regulation of nuclear pre-mRNA domain-containing protein 1B OS=Homo sapiens GN=RPRD1B PE=1 SV=1	1.394	0.4189	0.757676	1	1	1	0	0	0	0	0	0	0	0	0	0	0	0	0	0	0	0	0	0	0	0	0	0	0	0	0	0	0	0	0	0	0	0	0	0	0	0	0	0	0	0	0	0
RS10_HUMAN	40S ribosomal protein S10 OS=Homo sapiens GN=RPS10 PE=1 SV=1	3.623	0.7521	0.023154	7	7	2	7	6	3	9	8	3	8	7	3	8	7	3	11	10	4	3	3	1	3	3	0	6	5	2	7	5	2	4	4	2	3	3	0	10	7	3	2	2	1	5	4	2
RGPD4_HUMAN	RanBP2-like and GRIP domain-containing protein 4 OS=Homo sapiens GN=RGPD4 PE=2 SV=3	1.794	0.6805	0.102241	3	3	0	0	0	0	3	3	0	2	2	0	0	0	0	0	0	0	0	0	0	0	0	0	2	1	0	0	0	0	0	0	0	1	1	0	1	1	0	0	0	0	0	0	0
CI129_HUMAN	Putative uncharacterized protein C9orf129 OS=Homo sapiens GN=C9orf129 PE=1 SV=1	1.164	0.4579	3.27961	0	0	0	0	0	0	1	1	0	0	0	0	0	0	0	0	0	0	0	0	0	0	0	0	0	0	0	0	0	0	0	0	0	0	0	0	0	0	0	0	0	0	0	0	0
MSRB3_HUMAN	Methionine-R-sulfoxide reductase B3 OS=Homo sapiens GN=MSRB3 PE=1 SV=2	3.931	0.7429	0.005083	15	6	6	12	5	5	10	5	5	9	3	3	11	3	3	13	4	4	9	1	1	9	2	2	14	3	3	13	2	2	12	3	3	18	4	4	15	3	3	11	3	3	12	3	3
PHF5A_HUMAN	PHD finger-like domain-containing protein 5A OS=Homo sapiens GN=PHF5A PE=1 SV=1	2.042	0.4977	0.11697	3	3	3	2	2	2	2	2	2	2	2	2	2	2	2	3	3	3	2	2	2	2	2	2	0	0	0	2	2	2	2	2	2	2	2	2	3	3	3	1	1	1	0	0	0
P5CS_HUMAN	Delta-1-pyrroline-5-carboxylate synthase OS=Homo sapiens GN=ALDH18A1 PE=1 SV=2	2.808	0.6829	0.020827	2	2	2	0	0	0	0	0	0	6	6	6	0	0	0	2	2	2	0	0	0	0	0	0	1	1	1	3	3	3	0	0	0	1	1	1	2	2	2	0	0	0	0	0	0
PP1A_HUMAN	Serine/threonine-protein phosphatase PP1-alpha catalytic subunit OS=Homo sapiens GN=PPP1CA PE=1 SV=1	2.003	0.5177	0.048222	1	1	1	0	0	0	2	2	2	1	1	1	0	0	0	2	2	2	0	0	0	0	0	0	1	1	1	0	0	0	0	0	0	0	0	0	1	1	1	0	0	0	0	0	0
IF2P_HUMAN	Eukaryotic translation initiation factor 5B OS=Homo sapiens GN=EIF5B PE=1 SV=4	2.661	0.7084	0.020983	7	7	7	3	3	3	4	4	4	3	3	3	0	0	0	2	2	2	1	1	1	0	0	0	2	2	2	0	0	0	0	0	0	2	2	2	1	1	1	0	0	0	0	0	0
CRERF_HUMAN	CREB3 regulatory factor OS=Homo sapiens GN=CREBRF PE=1 SV=2	1.431	0.2268	0.170876	1	1	1	0	0	0	0	0	0	1	1	1	0	0	0	1	1	1	0	0	0	0	0	0	0	0	0	0	0	0	0	0	0	1	1	1	0	0	0	0	0	0	0	0	0
CAPG_HUMAN	Macrophage-capping protein OS=Homo sapiens GN=CAPG PE=1 SV=2	2.916	0.6962	0.014132	3	3	3	0	0	0	5	5	5	5	5	5	2	2	2	4	4	4	1	1	1	3	3	3	3	3	3	2	2	2	0	0	0	1	1	1	3	3	3	3	3	3	3	3	3
KCC2G_HUMAN	Calcium/calmodulin-dependent protein kinase type II subunit gamma OS=Homo sapiens GN=CAMK2G PE=1 SV=3	1.947	0.6091	0.206694	1	1	0	0	0	0	0	0	0	0	0	0	0	0	0	0	0	0	0	0	0	0	0	0	0	0	0	1	1	1	0	0	0	0	0	0	1	1	1	0	0	0	0	0	0
COPG2_HUMAN	Coatomer subunit gamma-2 OS=Homo sapiens GN=COPG2 PE=1 SV=1	1.886	0.2635	0.48814	0	0	0	0	0	0	1	1	0	0	0	0	0	0	0	0	0	0	0	0	0	0	0	0	0	0	0	1	1	0	0	0	0	0	0	0	0	0	0	0	0	0	0	0	0
UBL3_HUMAN	Ubiquitin-like protein 3 OS=Homo sapiens GN=UBL3 PE=1 SV=1	1.063	0.2672	1.57504	1	1	0	0	0	0	0	0	0	0	0	0	0	0	0	0	0	0	0	0	0	0	0	0	0	0	0	0	0	0	0	0	0	0	0	0	0	0	0	0	0	0	0	0	0
GDE_HUMAN	Glycogen debranching enzyme OS=Homo sapiens GN=AGL PE=1 SV=3	2.722	0.6319	0.838129	0	0	0	0	0	0	0	0	0	0	0	0	0	0	0	0	0	0	0	0	0	0	0	0	0	0	0	0	0	0	0	0	0	0	0	0	0	0	0	0	0	0	0	0	0
K2C79_HUMAN	Keratin, type II cytoskeletal 79 OS=Homo sapiens GN=KRT79 PE=1 SV=2	3.146	0.736	0.001668	13	8	0	19	7	0	15	9	0	21	11	1	26	7	1	17	9	1	45	6	0	29	9	1	27	7	0	22	8	1	35	8	0	24	7	0	23	8	1	29	8	1	19	6	1
UBA6_HUMAN	Ubiquitin-like modifier-activating enzyme 6 OS=Homo sapiens GN=UBA6 PE=1 SV=1	1.964	0.6268	0.142973	0	0	0	0	0	0	1	1	1	0	0	0	0	0	0	2	2	2	1	1	1	1	1	1	0	0	0	0	0	0	0	0	0	1	1	1	0	0	0	0	0	0	0	0	0
SAHH3_HUMAN	Putative adenosylhomocysteinase 3 OS=Homo sapiens GN=AHCYL2 PE=1 SV=1	2.261	0.5785	0.022898	6	6	0	2	2	0	3	3	0	2	2	0	0	0	0	3	3	0	0	0	0	1	1	0	2	2	0	0	0	0	0	0	0	1	1	0	2	2	0	0	0	0	0	0	0
SPB4_HUMAN	Serpin B4 OS=Homo sapiens GN=SERPINB4 PE=1 SV=2	2.549	0.6047	0.16817	0	0	0	0	0	0	1	1	0	1	1	0	2	2	0	1	1	0	5	5	2	0	0	0	1	1	0	2	2	0	1	1	0	1	1	0	3	3	0	0	0	0	0	0	0
TOIP2_HUMAN	Torsin-1A-interacting protein 2 OS=Homo sapiens GN=TOR1AIP2 PE=1 SV=1	2.005	0.6283	0.325021	2	2	2	0	0	0	1	1	1	0	0	0	0	0	0	0	0	0	0	0	0	0	0	0	0	0	0	0	0	0	0	0	0	0	0	0	0	0	0	0	0	0	0	0	0
AL9A1_HUMAN	4-trimethylaminobutyraldehyde dehydrogenase OS=Homo sapiens GN=ALDH9A1 PE=1 SV=3	1.718	0.4085	0.078522	1	1	1	0	0	0	1	1	1	2	2	2	1	1	1	1	1	1	1	1	1	1	1	1	0	0	0	1	1	1	1	1	1	1	1	1	2	2	2	1	1	1	0	0	0
MEP50_HUMAN	Methylosome protein 50 OS=Homo sapiens GN=WDR77 PE=1 SV=1	2.341	0.6608	0.246925	2	2	2	0	0	0	0	0	0	0	0	0	0	0	0	2	2	2	0	0	0	0	0	0	0	0	0	0	0	0	0	0	0	0	0	0	0	0	0	0	0	0	0	0	0
GSK3A_HUMAN	Glycogen synthase kinase-3 alpha OS=Homo sapiens GN=GSK3A PE=1 SV=2	1.436	0.4276	0.256056	0	0	0	0	0	0	0	0	0	0	0	0	0	0	0	1	1	1	0	0	0	0	0	0	0	0	0	0	0	0	0	0	0	0	0	0	0	0	0	0	0	0	0	0	0
CDK6_HUMAN	Cyclin-dependent kinase 6 OS=Homo sapiens GN=CDK6 PE=1 SV=1	2.507	0.5668	0.015307	4	3	2	1	1	0	1	1	0	1	1	0	1	1	0	1	1	0	0	0	0	1	1	0	1	1	0	1	1	0	1	1	0	2	2	1	1	1	0	0	0	0	1	1	0
PRP8_HUMAN	Pre-mRNA-processing-splicing factor 8 OS=Homo sapiens GN=PRPF8 PE=1 SV=2	2.385	0.7041	0.004467	10	10	10	7	7	7	9	9	9	7	7	7	5	5	5	12	12	12	1	1	1	4	4	4	12	12	12	2	2	2	1	1	1	13	13	13	6	6	6	1	1	1	4	4	4
CDK4_HUMAN	Cyclin-dependent kinase 4 OS=Homo sapiens GN=CDK4 PE=1 SV=2	2.193	0.5481	0.256957	2	1	0	1	1	0	1	1	0	1	1	0	1	1	0	1	1	0	0	0	0	1	1	0	1	1	0	1	1	0	1	1	0	1	1	0	1	1	0	0	0	0	1	1	0
SIAH1_HUMAN	E3 ubiquitin-protein ligase SIAH1 OS=Homo sapiens GN=SIAH1 PE=1 SV=2	2.271	0.5946	0.022643	1	1	1	2	2	1	2	2	1	1	1	1	3	2	1	1	1	1	1	1	1	2	2	1	0	0	0	2	2	1	0	0	0	1	1	1	2	2	1	1	1	1	2	2	1
CDK5_HUMAN	Cyclin-dependent kinase 5 OS=Homo sapiens GN=CDK5 PE=1 SV=3	2.193	0.5481	0.256957	2	1	0	1	1	0	1	1	0	1	1	0	1	1	0	1	1	0	0	0	0	1	1	0	1	1	0	1	1	0	1	1	0	1	1	0	1	1	0	0	0	0	1	1	0
FAT3_HUMAN	Protocadherin Fat 3 OS=Homo sapiens GN=FAT3 PE=2 SV=2	1.42	0.1704	0.191164	0	0	0	0	0	0	0	0	0	0	0	0	0	0	0	0	0	0	1	1	1	0	0	0	0	0	0	0	0	0	0	0	0	0	0	0	0	0	0	0	0	0	0	0	0
HV320_HUMAN	Ig heavy chain V-III region GAL OS=Homo sapiens PE=1 SV=1	1.928	0.3422	0.00165	0	0	0	0	0	0	0	0	0	0	0	0	1	1	0	0	0	0	0	0	0	0	0	0	0	0	0	0	0	0	0	0	0	1	1	0	0	0	0	0	0	0	0	0	0
UBP14_HUMAN	Ubiquitin carboxyl-terminal hydrolase 14 OS=Homo sapiens GN=USP14 PE=1 SV=3	2.785	0.7194	0.016153	5	5	5	0	0	0	3	3	3	6	6	6	2	2	2	6	6	6	1	1	1	3	3	3	1	1	1	3	3	3	3	3	3	2	2	2	5	5	5	1	1	1	2	2	2
PWP1_HUMAN	Periodic tryptophan protein 1 homolog OS=Homo sapiens GN=PWP1 PE=1 SV=1	1.461	0.2423	1.03485	0	0	0	0	0	0	1	1	1	0	0	0	1	1	1	0	0	0	0	0	0	0	0	0	0	0	0	0	0	0	0	0	0	0	0	0	0	0	0	0	0	0	0	0	0
ALBU_HUMAN	Serum albumin OS=Homo sapiens GN=ALB PE=1 SV=2	3.238	0.7072	0.002897	5	3	3	3	3	3	3	3	3	7	3	3	3	3	3	6	5	5	1	1	1	5	3	3	3	2	2	2	2	2	3	3	3	4	4	4	3	3	3	2	2	2	4	3	3
CLIC4_HUMAN	Chloride intracellular channel protein 4 OS=Homo sapiens GN=CLIC4 PE=1 SV=4	1.763	0.4294	0.869552	0	0	0	0	0	0	1	1	0	1	1	0	0	0	0	0	0	0	0	0	0	0	0	0	0	0	0	0	0	0	0	0	0	0	0	0	0	0	0	0	0	0	0	0	0
P4HA1_HUMAN	Prolyl 4-hydroxylase subunit alpha-1 OS=Homo sapiens GN=P4HA1 PE=1 SV=2	2.269	0.6922	0.074917	8	7	7	0	0	0	1	1	1	4	4	4	0	0	0	1	1	1	0	0	0	0	0	0	0	0	0	0	0	0	0	0	0	0	0	0	1	1	1	0	0	0	0	0	0
PDIP2_HUMAN	Polymerase delta-interacting protein 2 OS=Homo sapiens GN=POLDIP2 PE=1 SV=1	1.664	0.3891	0.153048	1	1	1	0	0	0	1	1	1	0	0	0	0	0	0	0	0	0	0	0	0	0	0	0	0	0	0	0	0	0	0	0	0	1	1	1	0	0	0	0	0	0	0	0	0
ACOC_HUMAN	Cytoplasmic aconitate hydratase OS=Homo sapiens GN=ACO1 PE=1 SV=3	1.25	0.1464	0.899594	0	0	0	0	0	0	0	0	0	0	0	0	0	0	0	0	0	0	0	0	0	0	0	0	0	0	0	0	0	0	0	0	0	0	0	0	0	0	0	0	0	0	0	0	0
ATX2L_HUMAN	Ataxin-2-like protein OS=Homo sapiens GN=ATXN2L PE=1 SV=2	2.745	0.6546	0.027622	2	2	2	0	0	0	1	1	1	3	3	3	1	1	1	1	1	1	1	1	1	0	0	0	4	4	4	0	0	0	1	1	1	2	2	2	0	0	0	0	0	0	0	0	0
CNDP2_HUMAN	Cytosolic non-specific dipeptidase OS=Homo sapiens GN=CNDP2 PE=1 SV=2	1.895	0.6267	0.025631	1	1	1	0	0	0	1	1	1	1	1	1	0	0	0	1	1	1	0	0	0	0	0	0	1	1	1	0	0	0	0	0	0	0	0	0	1	1	1	0	0	0	0	0	0
K2C3_HUMAN	Keratin, type II cytoskeletal 3 OS=Homo sapiens GN=KRT3 PE=1 SV=3	3.877	0.7299	0.001668	14	11	0	18	8	0	17	11	0	27	12	0	29	9	0	23	12	0	57	8	0	35	13	0	27	10	0	30	11	0	39	12	0	27	10	0	23	10	0	32	11	0	21	9	0
PP2BB_HUMAN	Serine/threonine-protein phosphatase 2B catalytic subunit beta isoform OS=Homo sapiens GN=PPP3CB PE=1 SV=2	2.066	0.6662	0.010917	3	3	0	1	1	0	1	1	0	0	0	0	0	0	0	0	0	0	0	0	0	0	0	0	0	0	0	0	0	0	0	0	0	0	0	0	0	0	0	0	0	0	0	0	0
CDK2_HUMAN	Cyclin-dependent kinase 2 OS=Homo sapiens GN=CDK2 PE=1 SV=2	2.712	0.5828	0.005125	4	3	1	1	1	0	2	2	0	4	4	2	1	1	0	2	2	0	0	0	0	1	1	0	2	2	0	3	3	1	1	1	0	1	1	0	4	4	2	0	0	0	1	1	0
PAWR_HUMAN	PRKC apoptosis WT1 regulator protein OS=Homo sapiens GN=PAWR PE=1 SV=1	2.844	0.7364	0.044535	1	1	1	1	1	1	2	2	2	2	2	2	1	1	1	1	1	1	1	1	1	1	1	1	1	1	1	1	1	1	1	1	1	1	1	1	1	1	1	1	1	1	1	1	1
CHST6_HUMAN	Carbohydrate sulfotransferase 6 OS=Homo sapiens GN=CHST6 PE=1 SV=1	1.236	0.1343	1.20172	0	0	0	0	0	0	0	0	0	0	0	0	0	0	0	0	0	0	0	0	0	0	0	0	0	0	0	0	0	0	0	0	0	0	0	0	0	0	0	0	0	0	0	0	0
RP1L1_HUMAN	Retinitis pigmentosa 1-like 1 protein OS=Homo sapiens GN=RP1L1 PE=1 SV=4	1.336	0.327	0.259005	0	0	0	1	1	1	1	1	1	1	1	1	1	1	1	0	0	0	1	1	1	1	1	1	1	1	1	1	1	1	1	1	1	1	1	1	0	0	0	1	1	1	1	1	1
ERLN1_HUMAN	Erlin-1 OS=Homo sapiens GN=ERLIN1 PE=1 SV=1	2.407	0.6988	0.028262	1	1	1	2	2	1	1	1	1	3	3	2	0	0	0	1	1	1	0	0	0	0	0	0	1	1	1	0	0	0	0	0	0	0	0	0	2	2	1	0	0	0	0	0	0
MCM5_HUMAN	DNA replication licensing factor MCM5 OS=Homo sapiens GN=MCM5 PE=1 SV=5	2.166	0.4926	0.167713	3	2	2	1	1	1	2	2	2	2	2	2	0	0	0	2	2	2	1	1	1	2	2	2	1	1	1	1	1	1	0	0	0	3	3	3	1	1	1	0	0	0	0	0	0
TBL1Y_HUMAN	F-box-like/WD repeat-containing protein TBL1Y OS=Homo sapiens GN=TBL1Y PE=2 SV=1	1.657	0.5015	0.53508	0	0	0	1	1	0	1	1	0	0	0	0	0	0	0	0	0	0	0	0	0	0	0	0	1	1	0	0	0	0	0	0	0	0	0	0	0	0	0	0	0	0	0	0	0
AK1D1_HUMAN	3-oxo-5-beta-steroid 4-dehydrogenase OS=Homo sapiens GN=AKR1D1 PE=1 SV=1	1.968	0.5325	0.331531	1	1	1	0	0	0	1	1	1	0	0	0	0	0	0	1	1	1	0	0	0	0	0	0	0	0	0	0	0	0	0	0	0	0	0	0	0	0	0	0	0	0	0	0	0
TBCD4_HUMAN	TBC1 domain family member 4 OS=Homo sapiens GN=TBC1D4 PE=1 SV=2	4.232	0.7181	0.00912	0	0	0	0	0	0	0	0	0	8	8	8	3	3	3	1	1	1	1	1	1	3	3	3	5	5	5	3	3	3	1	1	1	2	2	2	5	5	5	1	1	1	3	3	3
FBX22_HUMAN	F-box only protein 22 OS=Homo sapiens GN=FBXO22 PE=1 SV=1	1.867	0.5893	0.01126	0	0	0	1	1	1	0	0	0	2	2	2	0	0	0	0	0	0	0	0	0	0	0	0	0	0	0	1	1	1	0	0	0	0	0	0	1	1	1	0	0	0	0	0	0
TIMP2_HUMAN	Metalloproteinase inhibitor 2 OS=Homo sapiens GN=TIMP2 PE=1 SV=2	2.329	0.6879	0.454797	0	0	0	1	1	1	0	0	0	1	1	1	1	1	1	0	0	0	0	0	0	1	1	1	1	1	1	0	0	0	0	0	0	1	1	1	1	1	1	1	1	1	1	1	1
ESTD_HUMAN	S-formylglutathione hydrolase OS=Homo sapiens GN=ESD PE=1 SV=2	2.32	0.6633	0.178254	2	2	2	0	0	0	1	1	1	2	2	2	0	0	0	2	2	2	0	0	0	1	1	1	3	3	3	0	0	0	0	0	0	0	0	0	0	0	0	0	0	0	1	1	1
GLYM_HUMAN	Serine hydroxymethyltransferase, mitochondrial OS=Homo sapiens GN=SHMT2 PE=1 SV=3	2.379	0.6335	0.062039	2	2	2	1	1	1	3	3	3	6	6	6	3	3	3	7	7	7	0	0	0	3	3	3	5	5	5	3	3	3	1	1	1	4	4	4	4	4	4	1	1	1	2	2	2
HNMT_HUMAN	Histamine N-methyltransferase OS=Homo sapiens GN=HNMT PE=1 SV=1	1.329	0.2378	0.052384	0	0	0	0	0	0	0	0	0	1	1	1	0	0	0	0	0	0	0	0	0	0	0	0	0	0	0	0	0	0	0	0	0	0	0	0	0	0	0	0	0	0	0	0	0
HDGR3_HUMAN	Hepatoma-derived growth factor-related protein 3 OS=Homo sapiens GN=HDGFRP3 PE=1 SV=1	1.061	0.2545	0.691805	0	0	0	0	0	0	0	0	0	0	0	0	0	0	0	0	0	0	0	0	0	0	0	0	0	0	0	0	0	0	0	0	0	0	0	0	0	0	0	0	0	0	0	0	0
CLIC2_HUMAN	Chloride intracellular channel protein 2 OS=Homo sapiens GN=CLIC2 PE=1 SV=3	1.376	0.2314	0.869552	0	0	0	0	0	0	1	1	0	1	1	0	0	0	0	0	0	0	0	0	0	0	0	0	0	0	0	0	0	0	0	0	0	0	0	0	0	0	0	0	0	0	0	0	0
YKT6_HUMAN	Synaptobrevin homolog YKT6 OS=Homo sapiens GN=YKT6 PE=1 SV=1	1.88	0.3993	0.532507	0	0	0	0	0	0	0	0	0	0	0	0	1	1	1	0	0	0	0	0	0	0	0	0	0	0	0	0	0	0	0	0	0	0	0	0	1	1	1	1	1	1	0	0	0
PAB4L_HUMAN	Polyadenylate-binding protein 4-like OS=Homo sapiens GN=PABPC4L PE=2 SV=1	2.308	0.6654	0.198196	1	1	0	1	1	0	1	1	0	1	1	0	1	1	0	1	1	0	0	0	0	1	1	0	1	1	0	1	1	0	1	1	0	1	1	0	1	1	0	1	1	0	1	1	0
ARPC5_HUMAN	Actin-related protein 2/3 complex subunit 5 OS=Homo sapiens GN=ARPC5 PE=1 SV=3	1.718	0.39	0.232928	0	0	0	0	0	0	0	0	0	0	0	0	0	0	0	1	1	1	0	0	0	0	0	0	0	0	0	0	0	0	0	0	0	0	0	0	1	1	1	0	0	0	0	0	0
RL27_HUMAN	60S ribosomal protein L27 OS=Homo sapiens GN=RPL27 PE=1 SV=2	2.309	0.6285	0.00322	3	3	3	3	3	3	1	1	1	5	4	4	2	1	1	4	4	4	0	0	0	0	0	0	4	4	4	4	2	2	0	0	0	1	1	1	4	3	3	0	0	0	1	1	1
SRC8_HUMAN	Src substrate cortactin OS=Homo sapiens GN=CTTN PE=1 SV=2	3.212	0.7481	0.000819	9	8	8	7	7	7	10	10	10	11	10	10	9	9	9	16	15	15	6	6	6	8	8	8	10	10	10	11	11	11	5	5	5	8	8	8	8	8	8	7	7	7	9	9	9
ZRAB2_HUMAN	Zinc finger Ran-binding domain-containing protein 2 OS=Homo sapiens GN=ZRANB2 PE=1 SV=2	1.527	0.3248	0.675024	0	0	0	0	0	0	0	0	0	0	0	0	0	0	0	0	0	0	0	0	0	0	0	0	0	0	0	0	0	0	0	0	0	1	1	1	0	0	0	0	0	0	0	0	0
FKBP4_HUMAN	Peptidyl-prolyl cis-trans isomerase FKBP4 OS=Homo sapiens GN=FKBP4 PE=1 SV=3	3.777	0.7465	0.01399	6	6	6	1	1	1	6	5	5	10	8	7	5	4	4	11	10	10	3	3	3	7	6	6	7	6	6	5	5	5	1	1	1	6	5	5	11	9	9	5	4	4	6	6	6
CDK18_HUMAN	Cyclin-dependent kinase 18 OS=Homo sapiens GN=CDK18 PE=1 SV=3	2.193	0.5481	0.256957	2	1	0	1	1	0	1	1	0	1	1	0	1	1	0	1	1	0	0	0	0	1	1	0	1	1	0	1	1	0	1	1	0	1	1	0	1	1	0	0	0	0	1	1	0
CENPV_HUMAN	Centromere protein V OS=Homo sapiens GN=CENPV PE=1 SV=1	2.724	0.5198	0.418769	0	0	0	0	0	0	0	0	0	0	0	0	0	0	0	0	0	0	0	0	0	0	0	0	1	1	1	0	0	0	0	0	0	0	0	0	0	0	0	0	0	0	0	0	0
PABP5_HUMAN	Polyadenylate-binding protein 5 OS=Homo sapiens GN=PABPC5 PE=1 SV=1	2.643	0.4374	0.035718	1	1	0	1	1	0	1	1	0	1	1	0	0	0	0	1	1	0	0	0	0	0	0	0	1	1	0	1	1	0	0	0	0	1	1	0	1	1	0	0	0	0	0	0	0
BODG_HUMAN	Gamma-butyrobetaine dioxygenase OS=Homo sapiens GN=BBOX1 PE=1 SV=1	1.141	0.2174	0.400636	0	0	0	0	0	0	1	1	1	0	0	0	0	0	0	0	0	0	0	0	0	0	0	0	0	0	0	0	0	0	0	0	0	0	0	0	0	0	0	0	0	0	0	0	0
HDGR2_HUMAN	Hepatoma-derived growth factor-related protein 2 OS=Homo sapiens GN=HDGFRP2 PE=1 SV=1	1.061	0.2545	0.691805	0	0	0	0	0	0	0	0	0	0	0	0	0	0	0	0	0	0	0	0	0	0	0	0	0	0	0	0	0	0	0	0	0	0	0	0	0	0	0	0	0	0	0	0	0
DX39B_HUMAN	Spliceosome RNA helicase DDX39B OS=Homo sapiens GN=DDX39B PE=1 SV=1	2.468	0.6508	0.004149	6	6	0	3	3	0	5	5	0	4	4	0	1	1	0	7	6	1	0	0	0	3	3	1	7	6	0	2	2	0	0	0	0	4	4	1	2	2	0	1	1	0	3	3	1
AL1A3_HUMAN	Aldehyde dehydrogenase family 1 member A3 OS=Homo sapiens GN=ALDH1A3 PE=1 SV=2	1.351	0.2087	0.661042	0	0	0	0	0	0	0	0	0	0	0	0	0	0	0	0	0	0	0	0	0	0	0	0	0	0	0	1	1	1	0	0	0	0	0	0	0	0	0	0	0	0	0	0	0
DNJB6_HUMAN	DnaJ homolog subfamily B member 6 OS=Homo sapiens GN=DNAJB6 PE=1 SV=2	2.048	0.6177	0.624596	0	0	0	0	0	0	1	1	0	0	0	0	0	0	0	0	0	0	0	0	0	0	0	0	0	0	0	0	0	0	0	0	0	0	0	0	0	0	0	0	0	0	0	0	0
K22O_HUMAN	Keratin, type II cytoskeletal 2 oral OS=Homo sapiens GN=KRT76 PE=1 SV=2	3.877	0.6609	0.001668	12	9	0	20	8	0	18	11	0	25	10	0	34	9	0	21	10	0	70	8	0	39	10	0	28	9	0	33	9	0	41	11	0	28	9	0	24	10	0	36	10	0	24	9	0
NELFA_HUMAN	Negative elongation factor A OS=Homo sapiens GN=WHSC2 PE=1 SV=3	1.376	0.2544	0.07421	0	0	0	0	0	0	0	0	0	0	0	0	0	0	0	0	0	0	0	0	0	0	0	0	1	1	1	0	0	0	0	0	0	0	0	0	0	0	0	0	0	0	0	0	0
K2C75_HUMAN	Keratin, type II cytoskeletal 75 OS=Homo sapiens GN=KRT75 PE=1 SV=2	3.001	0.7169	0.001668	15	9	0	16	6	0	14	8	0	27	13	1	26	8	0	20	11	0	69	12	0	31	8	0	29	9	0	30	10	0	36	9	0	27	9	0	23	10	0	26	8	0	24	8	0
MOB1B_HUMAN	MOB kinase activator 1B OS=Homo sapiens GN=MOB1B PE=1 SV=3	2.017	0.586	0.159608	1	1	0	0	0	0	1	1	0	0	0	0	0	0	0	0	0	0	0	0	0	0	0	0	0	0	0	0	0	0	0	0	0	0	0	0	1	1	0	0	0	0	0	0	0
GANAB_HUMAN	Neutral alpha-glucosidase AB OS=Homo sapiens GN=GANAB PE=1 SV=3	3.823	0.8524	0.000242	17	17	17	5	5	5	20	19	19	13	12	12	5	5	5	20	17	17	4	4	4	8	7	7	10	10	10	4	4	4	3	3	3	7	7	7	6	6	6	5	5	5	8	7	7
HV312_HUMAN	Ig heavy chain V-III region BUR OS=Homo sapiens PE=1 SV=1	1.928	0.3422	0.00165	0	0	0	0	0	0	0	0	0	0	0	0	1	1	0	0	0	0	0	0	0	0	0	0	0	0	0	0	0	0	0	0	0	1	1	0	0	0	0	0	0	0	0	0	0
T194A_HUMAN	Transmembrane protein 194A OS=Homo sapiens GN=TMEM194A PE=1 SV=2	1.645	0.2698	0.730228	0	0	0	0	0	0	0	0	0	1	1	1	0	0	0	0	0	0	1	1	1	0	0	0	0	0	0	1	1	1	1	1	1	0	0	0	1	1	1	0	0	0	0	0	0
GSTM2_HUMAN	Glutathione S-transferase Mu 2 OS=Homo sapiens GN=GSTM2 PE=1 SV=2	2.109	0.5074	0.039012	1	1	0	1	1	0	1	1	0	1	1	0	1	1	0	1	1	0	0	0	0	1	1	0	1	1	0	1	1	0	1	1	0	1	1	0	1	1	0	1	1	0	1	1	0
RL29_HUMAN	60S ribosomal protein L29 OS=Homo sapiens GN=RPL29 PE=1 SV=2	2.28	0.7289	0.043099	0	0	0	1	1	1	0	0	0	1	1	1	0	0	0	1	1	1	0	0	0	1	1	1	1	1	1	1	1	1	0	0	0	1	1	1	1	1	1	0	0	0	0	0	0
ARC1A_HUMAN	Actin-related protein 2/3 complex subunit 1A OS=Homo sapiens GN=ARPC1A PE=1 SV=2	1.007	0.2373	0.321111	0	0	0	0	0	0	0	0	0	0	0	0	0	0	0	0	0	0	0	0	0	0	0	0	0	0	0	0	0	0	0	0	0	0	0	0	0	0	0	0	0	0	0	0	0
MVP_HUMAN	Major vault protein OS=Homo sapiens GN=MVP PE=1 SV=4	1.226	0.4429	0.223909	0	0	0	0	0	0	0	0	0	0	0	0	0	0	0	0	0	0	0	0	0	0	0	0	0	0	0	0	0	0	0	0	0	0	0	0	0	0	0	0	0	0	0	0	0
CAP1_HUMAN	Adenylyl cyclase-associated protein 1 OS=Homo sapiens GN=CAP1 PE=1 SV=5	2.885	0.6978	0.001668	11	9	8	5	5	5	8	8	6	5	5	5	6	6	6	8	7	7	2	2	2	3	3	3	7	6	6	3	3	3	3	3	3	5	5	5	6	6	6	2	2	2	4	4	4
CDK1_HUMAN	Cyclin-dependent kinase 1 OS=Homo sapiens GN=CDK1 PE=1 SV=3	2.712	0.6389	0.015415	5	4	2	2	2	1	5	5	3	4	4	2	2	2	1	4	4	2	0	0	0	2	2	1	5	5	3	3	3	1	3	3	2	1	1	0	4	4	2	1	1	1	2	2	1
RAC1_HUMAN	Ras-related C3 botulinum toxin substrate 1 OS=Homo sapiens GN=RAC1 PE=1 SV=1	2.338	0.55	0.013025	4	4	1	0	0	0	2	2	1	4	4	1	2	2	0	3	3	0	1	1	0	1	1	0	4	4	1	1	1	0	0	0	0	3	3	0	3	3	0	0	0	0	2	2	0
ACTN2_HUMAN	Alpha-actinin-2 OS=Homo sapiens GN=ACTN2 PE=1 SV=1	5.304	0.7903	0.064537	8	8	0	3	3	0	8	7	0	5	5	0	0	0	0	3	3	0	0	0	0	0	0	0	4	4	0	0	0	0	1	1	0	1	1	0	1	1	0	0	0	0	0	0	0
CDK3_HUMAN	Cyclin-dependent kinase 3 OS=Homo sapiens GN=CDK3 PE=1 SV=1	2.712	0.5481	0.256957	3	2	0	1	1	0	2	2	0	2	2	0	1	1	0	2	2	0	0	0	0	1	1	0	2	2	0	2	2	0	1	1	0	1	1	0	2	2	0	0	0	0	1	1	0
K2C78_HUMAN	Keratin, type II cytoskeletal 78 OS=Homo sapiens GN=KRT78 PE=2 SV=2	3.323	0.7299	0.011206	4	4	3	2	2	1	3	3	3	8	8	7	6	5	4	6	6	5	3	3	3	4	4	3	5	5	4	2	2	1	4	4	3	7	7	6	3	3	2	4	4	3	0	0	0
ATP5I_HUMAN	ATP synthase subunit e, mitochondrial OS=Homo sapiens GN=ATP5I PE=1 SV=2	1.913	0.4187	0.680203	1	1	1	0	0	0	0	0	0	1	1	1	0	0	0	0	0	0	0	0	0	0	0	0	0	0	0	0	0	0	0	0	0	0	0	0	0	0	0	0	0	0	0	0	0
DPP9_HUMAN	Dipeptidyl peptidase 9 OS=Homo sapiens GN=DPP9 PE=1 SV=3	1.872	0.5267	1.00738	0	0	0	0	0	0	0	0	0	0	0	0	0	0	0	1	1	1	0	0	0	0	0	0	0	0	0	0	0	0	0	0	0	0	0	0	0	0	0	0	0	0	0	0	0
CATL2_HUMAN	Cathepsin L2 OS=Homo sapiens GN=CTSL2 PE=1 SV=2	1.535	0.3518	0.74595	0	0	0	0	0	0	0	0	0	0	0	0	0	0	0	0	0	0	0	0	0	0	0	0	0	0	0	0	0	0	0	0	0	0	0	0	0	0	0	0	0	0	0	0	0
IFIX_HUMAN	Pyrin and HIN domain-containing protein 1 OS=Homo sapiens GN=PYHIN1 PE=1 SV=1	1.484	0.2628	0.594355	1	1	1	0	0	0	0	0	0	1	1	1	0	0	0	1	1	1	0	0	0	0	0	0	1	1	1	0	0	0	0	0	0	0	0	0	1	1	1	0	0	0	0	0	0
LRC43_HUMAN	Leucine-rich repeat-containing protein 43 OS=Homo sapiens GN=LRRC43 PE=2 SV=2	0.979	0.189	1.98361	1	1	1	0	0	0	0	0	0	0	0	0	0	0	0	0	0	0	0	0	0	0	0	0	0	0	0	0	0	0	0	0	0	0	0	0	0	0	0	0	0	0	0	0	0
ACLY_HUMAN	ATP-citrate synthase OS=Homo sapiens GN=ACLY PE=1 SV=3	3.114	0.6849	0.002813	10	10	10	4	4	4	17	17	17	16	16	16	5	5	5	12	12	12	8	8	8	6	6	6	12	12	12	11	11	11	3	3	3	8	8	8	11	11	11	2	2	2	5	5	5
CDC27_HUMAN	Cell division cycle protein 27 homolog OS=Homo sapiens GN=CDC27 PE=1 SV=2	1.053	0.4701	0.737122	0	0	0	0	0	0	0	0	0	0	0	0	0	0	0	0	0	0	0	0	0	0	0	0	1	1	1	0	0	0	0	0	0	0	0	0	0	0	0	0	0	0	0	0	0
BASI_HUMAN	Basigin OS=Homo sapiens GN=BSG PE=1 SV=2	3.669	0.7189	0.062255	4	4	4	2	2	2	5	4	4	4	3	3	3	3	3	6	6	6	0	0	0	2	2	2	3	3	3	2	2	2	1	1	1	3	3	3	5	5	5	1	1	1	2	2	2
TBA3E_HUMAN	Tubulin alpha-3E chain OS=Homo sapiens GN=TUBA3E PE=1 SV=2	4.095	0.8291	0.001966	59	9	0	28	8	0	46	10	0	33	9	0	21	9	0	32	9	0	26	5	0	14	6	0	23	8	0	25	8	0	10	6	0	19	6	0	32	9	0	14	6	0	13	6	0
LR37B_HUMAN	Leucine-rich repeat-containing protein 37B OS=Homo sapiens GN=LRRC37B PE=2 SV=3	1.164	0.2981	0.454669	0	0	0	0	0	0	0	0	0	0	0	0	0	0	0	1	1	1	0	0	0	0	0	0	1	1	1	0	0	0	0	0	0	1	1	1	0	0	0	0	0	0	0	0	0
MYL6_HUMAN	Myosin light polypeptide 6 OS=Homo sapiens GN=MYL6 PE=1 SV=2	2.9	0.7484	0.003971	3	3	2	0	0	0	2	2	1	1	1	0	1	1	0	3	3	2	0	0	0	1	1	0	2	2	1	1	1	0	1	1	0	1	1	0	1	1	1	1	1	0	1	1	0
ECI1_HUMAN	Enoyl-CoA delta isomerase 1, mitochondrial OS=Homo sapiens GN=ECI1 PE=1 SV=1	1.553	0.3046	0.636711	1	1	1	0	0	0	0	0	0	0	0	0	0	0	0	0	0	0	0	0	0	0	0	0	0	0	0	0	0	0	0	0	0	0	0	0	0	0	0	0	0	0	0	0	0
RHOC_HUMAN	Rho-related GTP-binding protein RhoC OS=Homo sapiens GN=RHOC PE=1 SV=1	1.672	0.448	0.00663	3	2	0	0	0	0	1	1	0	2	2	0	0	0	0	1	1	0	0	0	0	1	1	0	2	1	0	2	1	0	0	0	0	1	1	0	1	1	0	0	0	0	2	1	0
EXOS9_HUMAN	Exosome complex component RRP45 OS=Homo sapiens GN=EXOSC9 PE=1 SV=3	2.136	0.655	0.014214	1	1	1	0	0	0	1	1	1	1	1	1	0	0	0	0	0	0	0	0	0	0	0	0	0	0	0	0	0	0	0	0	0	0	0	0	0	0	0	0	0	0	0	0	0
GSHR_HUMAN	Glutathione reductase, mitochondrial OS=Homo sapiens GN=GSR PE=1 SV=2	3.024	0.6689	0.034409	3	3	3	2	2	2	4	4	4	3	3	3	1	1	1	2	2	2	1	1	1	1	1	1	4	4	4	2	2	2	3	3	3	2	2	2	4	4	4	2	2	2	3	3	3
TM231_HUMAN	Transmembrane protein 231 OS=Homo sapiens GN=TMEM231 PE=1 SV=1	1.104	0.3596	0.161113	0	0	0	0	0	0	0	0	0	0	0	0	0	0	0	0	0	0	0	0	0	0	0	0	0	0	0	0	0	0	1	1	1	0	0	0	0	0	0	1	1	1	0	0	0
SCHI1_HUMAN	Schwannomin-interacting protein 1 OS=Homo sapiens GN=SCHIP1 PE=1 SV=1	1.061	0.2281	1.0322	0	0	0	0	0	0	0	0	0	0	0	0	0	0	0	1	1	1	0	0	0	0	0	0	0	0	0	0	0	0	0	0	0	0	0	0	0	0	0	0	0	0	0	0	0
RL31_HUMAN	60S ribosomal protein L31 OS=Homo sapiens GN=RPL31 PE=1 SV=1	2.51	0.5171	0.045137	1	1	1	2	2	2	0	0	0	1	1	1	2	2	2	2	2	2	1	1	1	2	2	2	2	2	2	2	2	2	1	1	1	2	2	2	2	2	2	0	0	0	2	2	2
GSTM5_HUMAN	Glutathione S-transferase Mu 5 OS=Homo sapiens GN=GSTM5 PE=1 SV=3	2.109	0.5074	0.039012	1	1	0	1	1	0	1	1	0	1	1	0	1	1	0	1	1	0	0	0	0	1	1	0	1	1	0	1	1	0	1	1	0	1	1	0	1	1	0	1	1	0	1	1	0
K2C4_HUMAN	Keratin, type II cytoskeletal 4 OS=Homo sapiens GN=KRT4 PE=1 SV=4	2.788	0.7299	0.001668	5	4	0	15	5	0	7	4	0	10	5	0	28	9	3	11	5	0	60	4	0	35	14	7	18	5	0	22	5	0	43	15	7	16	5	0	14	5	0	32	12	6	16	4	0
PTN11_HUMAN	Tyrosine-protein phosphatase non-receptor type 11 OS=Homo sapiens GN=PTPN11 PE=1 SV=2	2.255	0.4985	0.089395	1	1	1	1	1	1	1	1	1	1	1	1	0	0	0	0	0	0	0	0	0	0	0	0	1	1	1	1	1	1	0	0	0	0	0	0	0	0	0	0	0	0	0	0	0
NU160_HUMAN	Nuclear pore complex protein Nup160 OS=Homo sapiens GN=NUP160 PE=1 SV=3	2.184	0.6099	0.064093	2	2	2	1	1	1	0	0	0	1	1	1	0	0	0	0	0	0	0	0	0	0	0	0	0	0	0	0	0	0	0	0	0	0	0	0	1	1	1	0	0	0	0	0	0
EXOSX_HUMAN	Exosome component 10 OS=Homo sapiens GN=EXOSC10 PE=1 SV=2	2.033	0.4262	0.258257	1	1	1	0	0	0	0	0	0	1	1	1	0	0	0	2	2	2	0	0	0	0	0	0	3	3	3	0	0	0	0	0	0	0	0	0	0	0	0	0	0	0	1	1	1
CPNE3_HUMAN	Copine-3 OS=Homo sapiens GN=CPNE3 PE=1 SV=1	1.819	0.4959	0.505419	1	1	0	0	0	0	0	0	0	0	0	0	0	0	0	1	1	1	0	0	0	0	0	0	0	0	0	0	0	0	0	0	0	0	0	0	0	0	0	0	0	0	0	0	0
SMC1A_HUMAN	Structural maintenance of chromosomes protein 1A OS=Homo sapiens GN=SMC1A PE=1 SV=2	2.844	0.6624	0.00282	7	7	7	3	3	3	3	3	3	8	8	8	1	1	1	8	8	8	2	2	2	0	0	0	8	8	8	2	2	2	0	0	0	2	2	2	4	4	4	0	0	0	5	5	5
SCRN1_HUMAN	Secernin-1 OS=Homo sapiens GN=SCRN1 PE=1 SV=2	2.088	0.7151	0.02378	1	1	1	0	0	0	0	0	0	1	1	1	0	0	0	3	3	3	0	0	0	0	0	0	1	1	1	1	1	1	0	0	0	0	0	0	1	1	1	0	0	0	0	0	0
ACOT8_HUMAN	Acyl-coenzyme A thioesterase 8 OS=Homo sapiens GN=ACOT8 PE=1 SV=1	1.892	0.546	0.905734	1	1	1	0	0	0	0	0	0	0	0	0	0	0	0	0	0	0	0	0	0	0	0	0	0	0	0	0	0	0	0	0	0	0	0	0	0	0	0	0	0	0	0	0	0
PO210_HUMAN	Nuclear pore membrane glycoprotein 210 OS=Homo sapiens GN=NUP210 PE=1 SV=3	1.944	0.6716	0.087519	7	7	7	3	3	3	4	4	4	1	1	1	0	0	0	1	1	1	0	0	0	0	0	0	0	0	0	0	0	0	0	0	0	0	0	0	0	0	0	0	0	0	0	0	0
RANG_HUMAN	Ran-specific GTPase-activating protein OS=Homo sapiens GN=RANBP1 PE=1 SV=1	2.358	0.6637	0.023798	3	3	3	0	0	0	1	1	1	1	1	1	0	0	0	1	1	1	0	0	0	1	1	1	1	1	1	1	1	1	1	1	1	1	1	1	3	3	3	1	1	1	1	1	1
SMD2_HUMAN	Small nuclear ribonucleoprotein Sm D2 OS=Homo sapiens GN=SNRPD2 PE=1 SV=1	2.158	0.6357	0.008596	2	2	2	1	1	1	1	1	1	1	1	1	1	1	1	2	2	2	1	1	1	1	1	1	2	2	2	1	1	1	0	0	0	2	2	2	2	2	2	0	0	0	2	2	2
XRN2_HUMAN	5'-3' exoribonuclease 2 OS=Homo sapiens GN=XRN2 PE=1 SV=1	2.003	0.5941	0.651614	0	0	0	0	0	0	0	0	0	0	0	0	0	0	0	0	0	0	0	0	0	0	0	0	1	1	1	0	0	0	0	0	0	0	0	0	1	1	1	0	0	0	0	0	0
DJC10_HUMAN	DnaJ homolog subfamily C member 10 OS=Homo sapiens GN=DNAJC10 PE=1 SV=2	3.594	0.6789	0.000375	9	8	8	2	2	2	6	6	6	7	7	7	3	3	3	7	6	6	1	1	1	2	2	2	9	8	8	4	4	4	1	1	1	5	5	5	3	3	3	2	2	2	3	3	3
IGHG1_HUMAN	Ig gamma-1 chain C region OS=Homo sapiens GN=IGHG1 PE=1 SV=1	2.028	0.6193	0.278415	0	0	0	0	0	0	0	0	0	0	0	0	0	0	0	0	0	0	0	0	0	0	0	0	0	0	0	0	0	0	0	0	0	0	0	0	0	0	0	0	0	0	0	0	0
PROF1_HUMAN	Profilin-1 OS=Homo sapiens GN=PFN1 PE=1 SV=2	3.163	0.7285	0.002996	10	8	8	3	3	3	11	10	10	11	8	8	6	5	5	11	9	9	3	3	3	7	6	6	7	6	6	9	6	6	2	2	2	6	6	6	13	7	7	3	3	3	6	5	5
LORI_HUMAN	Loricrin OS=Homo sapiens GN=LOR PE=1 SV=2	1.745	0.4716	0.462977	0	0	0	0	0	0	0	0	0	0	0	0	1	1	1	0	0	0	1	1	1	0	0	0	0	0	0	0	0	0	0	0	0	0	0	0	0	0	0	0	0	0	0	0	0
PROSC_HUMAN	Proline synthase co-transcribed bacterial homolog protein OS=Homo sapiens GN=PROSC PE=1 SV=1	2.253	0.7025	0.003644	0	0	0	0	0	0	1	1	1	2	2	2	0	0	0	1	1	1	0	0	0	0	0	0	1	1	1	1	1	1	0	0	0	1	1	1	0	0	0	0	0	0	1	1	1
1A29_HUMAN	HLA class I histocompatibility antigen, A-29 alpha chain OS=Homo sapiens GN=HLA-A PE=2 SV=2	2.621	0.7085	0.054574	1	1	0	1	1	0	2	2	0	0	0	0	0	0	0	1	1	0	0	0	0	0	0	0	0	0	0	0	0	0	0	0	0	0	0	0	1	1	0	1	1	0	0	0	0
TOIP1_HUMAN	Torsin-1A-interacting protein 1 OS=Homo sapiens GN=TOR1AIP1 PE=1 SV=2	1.614	0.6853	0.038811	1	1	1	0	0	0	1	1	1	0	0	0	1	1	1	0	0	0	0	0	0	0	0	0	0	0	0	0	0	0	0	0	0	0	0	0	0	0	0	0	0	0	0	0	0
MPPA_HUMAN	Mitochondrial-processing peptidase subunit alpha OS=Homo sapiens GN=PMPCA PE=1 SV=2	1.785	0.5272	0.60908	0	0	0	0	0	0	0	0	0	0	0	0	0	0	0	1	1	1	0	0	0	0	0	0	0	0	0	0	0	0	0	0	0	0	0	0	0	0	0	0	0	0	0	0	0
PP2BA_HUMAN	Serine/threonine-protein phosphatase 2B catalytic subunit alpha isoform OS=Homo sapiens GN=PPP3CA PE=1 SV=1	2.066	0.6662	0.010917	5	5	2	1	1	0	4	4	3	0	0	0	0	0	0	0	0	0	0	0	0	0	0	0	0	0	0	0	0	0	0	0	0	0	0	0	0	0	0	0	0	0	0	0	0
ILEU_HUMAN	Leukocyte elastase inhibitor OS=Homo sapiens GN=SERPINB1 PE=1 SV=1	2.941	0.6623	0.055668	13	12	12	4	4	4	9	9	9	3	3	3	0	0	0	2	2	2	2	2	2	1	1	1	1	1	1	2	2	2	0	0	0	2	2	2	3	3	3	0	0	0	1	1	1
LV109_HUMAN	Ig lambda chain V-I region EPS OS=Homo sapiens PE=1 SV=1	1.034	0.2099	0.01269	0	0	0	0	0	0	0	0	0	0	0	0	0	0	0	0	0	0	0	0	0	0	0	0	0	0	0	0	0	0	0	0	0	0	0	0	0	0	0	0	0	0	0	0	0
SPCS3_HUMAN	Signal peptidase complex subunit 3 OS=Homo sapiens GN=SPCS3 PE=1 SV=1	1.706	0.6266	0.241066	0	0	0	0	0	0	0	0	0	1	1	1	0	0	0	0	0	0	0	0	0	0	0	0	0	0	0	0	0	0	0	0	0	0	0	0	1	1	1	0	0	0	0	0	0
IDE_HUMAN	Insulin-degrading enzyme OS=Homo sapiens GN=IDE PE=1 SV=4	1.443	0.58	0.151985	1	1	1	0	0	0	0	0	0	0	0	0	0	0	0	1	1	1	0	0	0	0	0	0	0	0	0	0	0	0	0	0	0	0	0	0	0	0	0	0	0	0	0	0	0
HDAC6_HUMAN	Histone deacetylase 6 OS=Homo sapiens GN=HDAC6 PE=1 SV=2	1.554	0.3565	0.342463	0	0	0	0	0	0	0	0	0	0	0	0	0	0	0	1	1	1	0	0	0	0	0	0	0	0	0	0	0	0	0	0	0	1	1	1	0	0	0	0	0	0	0	0	0
MDHC_HUMAN	Malate dehydrogenase, cytoplasmic OS=Homo sapiens GN=MDH1 PE=1 SV=4	2.331	0.7123	0.008317	4	4	4	2	2	2	8	8	8	4	3	3	1	1	1	6	5	5	1	1	1	2	2	2	3	3	3	1	1	1	0	0	0	3	3	3	3	3	3	1	1	1	4	4	4
EXOS7_HUMAN	Exosome complex component RRP42 OS=Homo sapiens GN=EXOSC7 PE=1 SV=3	1.879	0.6716	0.237413	0	0	0	0	0	0	0	0	0	0	0	0	0	0	0	0	0	0	0	0	0	1	1	1	0	0	0	0	0	0	0	0	0	0	0	0	0	0	0	0	0	0	0	0	0
RL28_HUMAN	60S ribosomal protein L28 OS=Homo sapiens GN=RPL28 PE=1 SV=3	2.167	0.5275	0.014738	1	1	1	2	2	2	2	2	2	1	1	1	0	0	0	1	1	1	0	0	0	2	2	2	2	2	2	3	3	3	0	0	0	2	2	2	2	2	2	0	0	0	2	2	2
MAST2_HUMAN	Microtubule-associated serine/threonine-protein kinase 2 OS=Homo sapiens GN=MAST2 PE=1 SV=2	1.922	0.4043	0.237803	1	1	0	0	0	0	0	0	0	0	0	0	0	0	0	0	0	0	0	0	0	0	0	0	0	0	0	0	0	0	0	0	0	0	0	0	1	1	0	0	0	0	0	0	0
XDH_HUMAN	Xanthine dehydrogenase/oxidase OS=Homo sapiens GN=XDH PE=1 SV=4	2.097	0.5026	0.09151	0	0	0	4	4	4	0	0	0	0	0	0	0	0	0	0	0	0	0	0	0	0	0	0	0	0	0	0	0	0	0	0	0	0	0	0	0	0	0	0	0	0	0	0	0
GSTM3_HUMAN	Glutathione S-transferase Mu 3 OS=Homo sapiens GN=GSTM3 PE=1 SV=3	2.109	0.6356	0.039012	4	4	3	1	1	0	2	2	1	1	1	0	1	1	0	2	2	1	0	0	0	1	1	0	2	2	1	1	1	0	1	1	0	1	1	0	1	1	0	1	1	0	1	1	0
PIR_HUMAN	Pirin OS=Homo sapiens GN=PIR PE=1 SV=1	1.406	0.5497	0.140854	1	1	1	0	0	0	0	0	0	1	1	1	0	0	0	0	0	0	0	0	0	0	0	0	0	0	0	0	0	0	0	0	0	0	0	0	1	1	1	0	0	0	0	0	0
SMN_HUMAN	Survival motor neuron protein OS=Homo sapiens GN=SMN1 PE=1 SV=1	2.101	0.5221	0.207903	1	1	1	0	0	0	0	0	0	0	0	0	0	0	0	0	0	0	0	0	0	0	0	0	0	0	0	0	0	0	0	0	0	0	0	0	0	0	0	0	0	0	1	1	1
HSP74_HUMAN	Heat shock 70 kDa protein 4 OS=Homo sapiens GN=HSPA4 PE=1 SV=4	3.967	0.7757	0.000415	37	35	34	26	25	24	38	33	31	15	15	15	11	11	10	16	16	15	9	9	8	8	8	7	13	13	13	10	10	9	3	3	2	11	11	11	13	13	12	7	7	7	11	11	11
DNM1L_HUMAN	Dynamin-1-like protein OS=Homo sapiens GN=DNM1L PE=1 SV=2	2.185	0.5168	0.03139	4	4	4	0	0	0	0	0	0	2	2	2	0	0	0	1	1	1	0	0	0	0	0	0	1	1	1	0	0	0	0	0	0	0	0	0	1	1	1	0	0	0	0	0	0
KPRA_HUMAN	Phosphoribosyl pyrophosphate synthase-associated protein 1 OS=Homo sapiens GN=PRPSAP1 PE=1 SV=2	1.96	0.473	1.07767	1	1	0	0	0	0	1	1	0	0	0	0	0	0	0	0	0	0	0	0	0	0	0	0	0	0	0	0	0	0	0	0	0	0	0	0	0	0	0	0	0	0	0	0	0
MOT1_HUMAN	Monocarboxylate transporter 1 OS=Homo sapiens GN=SLC16A1 PE=1 SV=3	1.35	0.4185	0.304382	0	0	0	0	0	0	1	1	1	0	0	0	0	0	0	0	0	0	0	0	0	0	0	0	0	0	0	0	0	0	0	0	0	0	0	0	0	0	0	0	0	0	0	0	0
ZN608_HUMAN	Zinc finger protein 608 OS=Homo sapiens GN=ZNF608 PE=1 SV=4	1.075	0.2819	0.861151	0	0	0	0	0	0	0	0	0	0	0	0	0	0	0	0	0	0	0	0	0	0	0	0	0	0	0	0	0	0	0	0	0	0	0	0	0	0	0	0	0	0	0	0	0
AN36C_HUMAN	Ankyrin repeat domain-containing protein 36C OS=Homo sapiens GN=ANKRD36C PE=2 SV=3	1.172	0.4753	1.19437	0	0	0	0	0	0	0	0	0	0	0	0	0	0	0	0	0	0	0	0	0	0	0	0	0	0	0	0	0	0	0	0	0	0	0	0	0	0	0	0	0	0	0	0	0
IMP3_HUMAN	U3 small nucleolar ribonucleoprotein protein IMP3 OS=Homo sapiens GN=IMP3 PE=1 SV=1	1.701	0.1311	0.602884	0	0	0	0	0	0	0	0	0	0	0	0	0	0	0	0	0	0	0	0	0	0	0	0	0	0	0	0	0	0	0	0	0	0	0	0	0	0	0	0	0	0	0	0	0
ACTZ_HUMAN	Alpha-centractin OS=Homo sapiens GN=ACTR1A PE=1 SV=1	2.257	0.5714	0.004223	3	3	2	3	3	1	0	0	0	2	2	1	3	3	1	3	3	2	2	2	1	3	3	1	4	4	2	2	2	1	2	2	0	3	3	2	3	3	2	1	1	0	4	4	2
WDR35_HUMAN	WD repeat-containing protein 35 OS=Homo sapiens GN=WDR35 PE=1 SV=3	1.545	0.1868	0.793718	0	0	0	0	0	0	0	0	0	1	1	0	0	0	0	0	0	0	0	0	0	0	0	0	0	0	0	0	0	0	0	0	0	0	0	0	1	1	0	0	0	0	0	0	0
TRFL_HUMAN	Lactotransferrin OS=Homo sapiens GN=LTF PE=1 SV=6	1.526	0.3893	0.016966	0	0	0	1	1	1	0	0	0	0	0	0	0	0	0	0	0	0	0	0	0	0	0	0	0	0	0	0	0	0	0	0	0	0	0	0	0	0	0	0	0	0	0	0	0
FLII_HUMAN	Protein flightless-1 homolog OS=Homo sapiens GN=FLII PE=1 SV=2	1.934	0.4088	0.37516	2	2	2	0	0	0	0	0	0	0	0	0	0	0	0	0	0	0	0	0	0	0	0	0	0	0	0	0	0	0	0	0	0	0	0	0	0	0	0	0	0	0	0	0	0
SRS10_HUMAN	Serine/arginine-rich splicing factor 10 OS=Homo sapiens GN=SRSF10 PE=1 SV=1	2.957	0.667	0.003225	3	3	3	2	2	2	3	3	3	1	1	1	3	3	3	3	3	3	3	3	3	1	1	1	3	3	3	2	2	2	2	2	2	3	3	3	1	1	1	1	1	1	3	3	3
TAGL2_HUMAN	Transgelin-2 OS=Homo sapiens GN=TAGLN2 PE=1 SV=3	2.632	0.7084	0.006089	11	11	10	4	4	3	9	9	8	8	7	6	4	4	3	8	7	6	3	3	2	4	4	3	5	5	4	9	6	5	2	2	2	6	5	4	9	7	5	4	4	3	4	4	3
NIT2_HUMAN	Omega-amidase NIT2 OS=Homo sapiens GN=NIT2 PE=1 SV=1	2.142	0.7185	0.181599	0	0	0	0	0	0	1	1	1	2	2	2	0	0	0	2	2	2	0	0	0	0	0	0	2	2	2	0	0	0	0	0	0	0	0	0	0	0	0	0	0	0	0	0	0
F105B_HUMAN	Protein FAM105B OS=Homo sapiens GN=FAM105B PE=1 SV=3	1.559	0.5097	0.27371	2	2	2	0	0	0	1	1	1	0	0	0	0	0	0	0	0	0	0	0	0	0	0	0	0	0	0	0	0	0	0	0	0	0	0	0	2	2	2	0	0	0	0	0	0
DDX1_HUMAN	ATP-dependent RNA helicase DDX1 OS=Homo sapiens GN=DDX1 PE=1 SV=2	2.913	0.7426	0.108456	4	3	3	1	1	1	2	2	2	4	4	4	2	2	2	5	5	5	2	2	2	3	3	3	5	5	5	5	5	5	2	2	2	2	2	2	4	4	4	1	1	1	3	3	3
SCRB2_HUMAN	Lysosome membrane protein 2 OS=Homo sapiens GN=SCARB2 PE=1 SV=2	1.652	0.431	0.535532	0	0	0	0	0	0	0	0	0	1	1	1	0	0	0	1	1	1	0	0	0	0	0	0	0	0	0	0	0	0	0	0	0	0	0	0	0	0	0	0	0	0	0	0	0
ADDA_HUMAN	Alpha-adducin OS=Homo sapiens GN=ADD1 PE=1 SV=2	1.96	0.5036	0.395162	1	1	1	2	2	2	1	1	1	0	0	0	0	0	0	0	0	0	0	0	0	0	0	0	0	0	0	0	0	0	0	0	0	0	0	0	0	0	0	0	0	0	0	0	0
PIGX_HUMAN	Phosphatidylinositol-glycan biosynthesis class X protein OS=Homo sapiens GN=PIGX PE=2 SV=3	1.041	0.3641	0.698535	0	0	0	0	0	0	0	0	0	0	0	0	0	0	0	0	0	0	0	0	0	0	0	0	0	0	0	0	0	0	0	0	0	0	0	0	0	0	0	0	0	0	0	0	0
FN3K_HUMAN	Fructosamine-3-kinase OS=Homo sapiens GN=FN3K PE=1 SV=1	2.254	0.6475	0.370816	0	0	0	0	0	0	0	0	0	0	0	0	0	0	0	1	1	1	0	0	0	0	0	0	0	0	0	1	1	1	0	0	0	1	1	1	1	1	1	0	0	0	1	1	1
ZC3HE_HUMAN	Zinc finger CCCH domain-containing protein 14 OS=Homo sapiens GN=ZC3H14 PE=1 SV=1	1.844	0.5802	0.094083	0	0	0	0	0	0	2	2	2	0	0	0	1	1	1	0	0	0	0	0	0	0	0	0	1	1	1	0	0	0	1	1	1	0	0	0	0	0	0	0	0	0	0	0	0
STK39_HUMAN	STE20/SPS1-related proline-alanine-rich protein kinase OS=Homo sapiens GN=STK39 PE=1 SV=3	1.41	0.4042	0.292212	1	1	0	0	0	0	1	1	0	0	0	0	0	0	0	1	1	0	0	0	0	0	0	0	1	1	0	0	0	0	0	0	0	0	0	0	0	0	0	0	0	0	0	0	0
QCR2_HUMAN	Cytochrome b-c1 complex subunit 2, mitochondrial OS=Homo sapiens GN=UQCRC2 PE=1 SV=3	3.566	0.7081	0.121579	2	2	2	1	1	1	1	1	1	1	1	1	0	0	0	3	3	3	0	0	0	1	1	1	1	1	1	0	0	0	0	0	0	1	1	1	1	1	1	0	0	0	0	0	0
RAN_HUMAN	GTP-binding nuclear protein Ran OS=Homo sapiens GN=RAN PE=1 SV=3	2.801	0.6996	0.02057	6	5	5	3	3	3	7	7	7	9	5	5	8	3	3	9	6	6	5	3	3	5	3	3	10	5	5	6	3	3	2	2	2	7	5	5	9	4	4	5	3	3	6	4	4
HV311_HUMAN	Ig heavy chain V-III region KOL OS=Homo sapiens PE=1 SV=1	1.928	0.3422	0.00165	0	0	0	0	0	0	0	0	0	0	0	0	1	1	0	0	0	0	0	0	0	0	0	0	0	0	0	0	0	0	0	0	0	1	1	0	0	0	0	0	0	0	0	0	0
COX5A_HUMAN	Cytochrome c oxidase subunit 5A, mitochondrial OS=Homo sapiens GN=COX5A PE=1 SV=2	1.905	0.2535	0.239974	0	0	0	0	0	0	0	0	0	0	0	0	0	0	0	0	0	0	0	0	0	0	0	0	0	0	0	0	0	0	0	0	0	0	0	0	1	1	1	0	0	0	0	0	0
IPKB_HUMAN	cAMP-dependent protein kinase inhibitor beta OS=Homo sapiens GN=PKIB PE=2 SV=1	1.554	0.1931	1.38438	0	0	0	0	0	0	0	0	0	0	0	0	0	0	0	0	0	0	0	0	0	0	0	0	0	0	0	0	0	0	0	0	0	0	0	0	0	0	0	0	0	0	0	0	0
AT1A2_HUMAN	Sodium/potassium-transporting ATPase subunit alpha-2 OS=Homo sapiens GN=ATP1A2 PE=1 SV=1	2.372	0.7567	0.00347	2	2	0	2	2	0	4	4	0	4	3	0	2	2	0	3	3	0	1	1	0	2	2	0	2	2	0	1	1	0	1	1	0	2	2	0	3	3	0	2	2	0	2	2	0
TBL1R_HUMAN	F-box-like/WD repeat-containing protein TBL1XR1 OS=Homo sapiens GN=TBL1XR1 PE=1 SV=1	1.657	0.5015	0.41668	0	0	0	1	1	0	1	1	0	1	1	1	0	0	0	0	0	0	0	0	0	0	0	0	1	1	0	0	0	0	0	0	0	0	0	0	0	0	0	0	0	0	0	0	0
ERBB2_HUMAN	Receptor tyrosine-protein kinase erbB-2 OS=Homo sapiens GN=ERBB2 PE=1 SV=1	2.146	0.6421	0.975784	0	0	0	0	0	0	1	1	0	0	0	0	0	0	0	0	0	0	0	0	0	0	0	0	0	0	0	0	0	0	0	0	0	0	0	0	0	0	0	0	0	0	0	0	0
IL27A_HUMAN	Interleukin-27 subunit alpha OS=Homo sapiens GN=IL27 PE=1 SV=2	1.238	0.3045	0.495403	0	0	0	0	0	0	0	0	0	0	0	0	0	0	0	0	0	0	0	0	0	0	0	0	0	0	0	1	1	1	0	0	0	0	0	0	0	0	0	0	0	0	0	0	0
DIAP1_HUMAN	Protein diaphanous homolog 1 OS=Homo sapiens GN=DIAPH1 PE=1 SV=2	2.402	0.5783	0.191957	2	2	2	1	1	1	1	1	1	0	0	0	0	0	0	2	2	2	0	0	0	2	2	2	1	1	1	0	0	0	0	0	0	0	0	0	0	0	0	0	0	0	0	0	0
ARF1_HUMAN	ADP-ribosylation factor 1 OS=Homo sapiens GN=ARF1 PE=1 SV=2	2.473	0.7276	0.005998	5	5	0	3	3	0	4	3	0	3	3	0	3	3	0	3	2	0	1	1	0	1	1	0	2	2	0	0	0	0	2	2	0	2	2	0	4	4	0	1	1	0	3	3	0
ARF3_HUMAN	ADP-ribosylation factor 3 OS=Homo sapiens GN=ARF3 PE=1 SV=2	2.473	0.7276	0.005998	5	5	0	3	3	0	4	3	0	3	3	0	3	3	0	3	2	0	1	1	0	1	1	0	2	2	0	0	0	0	2	2	0	2	2	0	4	4	0	1	1	0	3	3	0
LBR_HUMAN	Lamin-B receptor OS=Homo sapiens GN=LBR PE=1 SV=2	1.978	0.4969	0.101045	1	1	1	1	1	1	1	1	1	1	1	1	0	0	0	0	0	0	0	0	0	0	0	0	0	0	0	0	0	0	0	0	0	0	0	0	1	1	1	0	0	0	1	1	1
SCG2_HUMAN	Secretogranin-2 OS=Homo sapiens GN=SCG2 PE=1 SV=2	1.111	0.2702	0.005618	0	0	0	0	0	0	0	0	0	0	0	0	0	0	0	1	1	1	0	0	0	1	1	1	0	0	0	0	0	0	0	0	0	1	1	1	0	0	0	0	0	0	0	0	0
BTBDB_HUMAN	Ankyrin repeat and BTB/POZ domain-containing protein BTBD11 OS=Homo sapiens GN=BTBD11 PE=2 SV=3	1.022	0.275	3.54525	0	0	0	1	1	1	0	0	0	0	0	0	0	0	0	0	0	0	0	0	0	0	0	0	0	0	0	0	0	0	0	0	0	0	0	0	0	0	0	0	0	0	0	0	0
RS8_HUMAN	40S ribosomal protein S8 OS=Homo sapiens GN=RPS8 PE=1 SV=2	3.121	0.6853	0.021587	1	1	1	3	3	3	3	3	3	6	5	5	2	2	2	6	5	5	0	0	0	1	1	1	6	5	5	2	2	2	0	0	0	3	3	3	1	1	1	0	0	0	1	1	1
SAFB2_HUMAN	Scaffold attachment factor B2 OS=Homo sapiens GN=SAFB2 PE=1 SV=1	2.442	0.5896	0.131746	2	2	0	1	1	0	2	2	1	1	1	0	0	0	0	2	2	0	1	1	0	1	1	0	3	3	1	1	1	0	0	0	0	1	1	0	2	2	0	0	0	0	0	0	0
VWA9_HUMAN	von Willebrand factor A domain-containing protein 9 OS=Homo sapiens GN=VWA9 PE=1 SV=2	1.255	0.4065	0.608209	0	0	0	1	1	1	0	0	0	0	0	0	0	0	0	1	1	1	0	0	0	0	0	0	0	0	0	0	0	0	0	0	0	0	0	0	0	0	0	0	0	0	0	0	0
MIF_HUMAN	Macrophage migration inhibitory factor OS=Homo sapiens GN=MIF PE=1 SV=4	1.917	0.4666	0.268918	3	1	1	1	1	1	1	1	1	3	1	1	1	1	1	1	1	1	2	1	1	1	1	1	1	1	1	3	1	1	2	1	1	1	1	1	1	1	1	2	1	1	2	1	1
DYST_HUMAN	Dystonin OS=Homo sapiens GN=DST PE=1 SV=4	1.479	0.199	0.76103	0	0	0	0	0	0	0	0	0	1	1	1	0	0	0	0	0	0	0	0	0	1	1	1	1	1	1	0	0	0	0	0	0	0	0	0	0	0	0	0	0	0	0	0	0
SRP09_HUMAN	Signal recognition particle 9 kDa protein OS=Homo sapiens GN=SRP9 PE=1 SV=2	2.04	0.3403	0.131153	0	0	0	0	0	0	0	0	0	0	0	0	1	1	1	0	0	0	0	0	0	0	0	0	0	0	0	0	0	0	0	0	0	0	0	0	1	1	1	0	0	0	1	1	1
2ABB_HUMAN	Serine/threonine-protein phosphatase 2A 55 kDa regulatory subunit B beta isoform OS=Homo sapiens GN=PPP2R2B PE=1 SV=1	2.006	0.3205	0.239726	0	0	0	0	0	0	0	0	0	1	1	0	0	0	0	0	0	0	0	0	0	0	0	0	0	0	0	0	0	0	0	0	0	0	0	0	0	0	0	0	0	0	0	0	0
HBA_HUMAN	Hemoglobin subunit alpha OS=Homo sapiens GN=HBA1 PE=1 SV=2	1.862	0.3684	0.361906	0	0	0	0	0	0	0	0	0	0	0	0	0	0	0	0	0	0	0	0	0	0	0	0	0	0	0	0	0	0	0	0	0	0	0	0	0	0	0	0	0	0	0	0	0
PLCG1_HUMAN	1-phosphatidylinositol 4,5-bisphosphate phosphodiesterase gamma-1 OS=Homo sapiens GN=PLCG1 PE=1 SV=1	1.694	0.3738	0.115172	0	0	0	0	0	0	0	0	0	1	1	1	0	0	0	1	1	1	1	1	1	0	0	0	0	0	0	0	0	0	0	0	0	0	0	0	0	0	0	0	0	0	1	1	1
FHL2_HUMAN	Four and a half LIM domains protein 2 OS=Homo sapiens GN=FHL2 PE=1 SV=3	3.381	0.6681	0.009743	6	4	4	4	4	4	5	4	4	7	5	5	3	3	3	4	3	3	1	1	1	5	4	4	7	5	5	7	5	5	5	3	3	5	3	3	6	5	5	4	3	3	5	5	5
SRSF8_HUMAN	Serine/arginine-rich splicing factor 8 OS=Homo sapiens GN=SRSF8 PE=1 SV=1	2.119	0.439	0.069003	2	2	0	2	2	0	2	2	0	1	1	0	2	2	0	2	2	0	1	1	0	2	2	0	2	2	0	2	2	0	2	2	0	2	2	0	2	2	0	2	2	0	2	2	0
ARP3_HUMAN	Actin-related protein 3 OS=Homo sapiens GN=ACTR3 PE=1 SV=3	2.503	0.586	0.003368	3	3	1	1	1	1	4	4	2	4	4	2	1	1	0	3	3	1	0	0	0	2	2	0	2	2	1	2	2	1	0	0	0	2	2	1	3	3	1	0	0	0	1	1	0
CSK21_HUMAN	Casein kinase II subunit alpha OS=Homo sapiens GN=CSNK2A1 PE=1 SV=1	1.973	0.493	0.429683	0	0	0	0	0	0	1	1	1	0	0	0	0	0	0	1	1	1	0	0	0	0	0	0	0	0	0	0	0	0	0	0	0	0	0	0	0	0	0	0	0	0	0	0	0
HV302_HUMAN	Ig heavy chain V-III region WEA OS=Homo sapiens PE=1 SV=1	1.928	0.3422	0.00165	0	0	0	0	0	0	0	0	0	0	0	0	1	1	0	0	0	0	0	0	0	0	0	0	0	0	0	0	0	0	0	0	0	1	1	0	0	0	0	0	0	0	0	0	0
PSMD3_HUMAN	26S proteasome non-ATPase regulatory subunit 3 OS=Homo sapiens GN=PSMD3 PE=1 SV=2	3.085	0.7958	0.00933	15	15	15	9	8	8	3	3	3	4	4	4	1	1	1	3	3	3	3	3	3	2	2	2	6	6	6	3	3	3	0	0	0	4	4	4	4	4	4	1	1	1	3	3	3
CSDE1_HUMAN	Cold shock domain-containing protein E1 OS=Homo sapiens GN=CSDE1 PE=1 SV=2	2.51	0.7322	0.017056	4	4	4	0	0	0	5	5	5	4	4	4	4	4	4	8	8	8	1	1	1	5	5	5	9	9	9	2	2	2	2	2	2	4	4	4	3	3	3	0	0	0	6	6	6
PERI_HUMAN	Peripherin OS=Homo sapiens GN=PRPH PE=1 SV=2	2.484	0.5222	0.001237	5	3	0	3	2	0	3	2	0	3	3	0	5	3	0	3	3	0	2	1	0	4	2	0	6	3	0	5	3	0	3	2	0	6	3	0	4	3	0	1	1	0	3	1	0
MOB1A_HUMAN	MOB kinase activator 1A OS=Homo sapiens GN=MOB1A PE=1 SV=4	2.017	0.586	0.159608	1	1	0	0	0	0	1	1	0	0	0	0	0	0	0	0	0	0	0	0	0	0	0	0	0	0	0	0	0	0	0	0	0	0	0	0	1	1	0	0	0	0	0	0	0
SCMC1_HUMAN	Calcium-binding mitochondrial carrier protein SCaMC-1 OS=Homo sapiens GN=SLC25A24 PE=1 SV=2	1.261	0.3053	0.610007	0	0	0	0	0	0	0	0	0	0	0	0	0	0	0	0	0	0	0	0	0	0	0	0	0	0	0	0	0	0	0	0	0	0	0	0	0	0	0	0	0	0	0	0	0
CELF1_HUMAN	CUGBP Elav-like family member 1 OS=Homo sapiens GN=CELF1 PE=1 SV=2	1.621	0.3436	0.601165	0	0	0	0	0	0	0	0	0	0	0	0	0	0	0	0	0	0	0	0	0	0	0	0	0	0	0	0	0	0	0	0	0	0	0	0	1	1	1	0	0	0	0	0	0
RS30_HUMAN	40S ribosomal protein S30 OS=Homo sapiens GN=FAU PE=1 SV=1	1.913	0.5541	0.719904	1	1	1	0	0	0	0	0	0	0	0	0	0	0	0	0	0	0	0	0	0	0	0	0	1	1	1	0	0	0	0	0	0	0	0	0	0	0	0	0	0	0	0	0	0
RBM8A_HUMAN	RNA-binding protein 8A OS=Homo sapiens GN=RBM8A PE=1 SV=1	3.811	0.7258	0.013325	3	3	3	1	1	1	3	3	3	4	4	4	2	2	2	4	4	4	2	2	2	2	2	2	5	5	5	3	3	3	1	1	1	3	3	3	3	3	3	1	1	1	2	2	2
MGMT_HUMAN	Methylated-DNA--protein-cysteine methyltransferase OS=Homo sapiens GN=MGMT PE=1 SV=1	2.024	0.5372	0.170025	0	0	0	0	0	0	0	0	0	0	0	0	1	1	1	0	0	0	1	1	1	0	0	0	1	1	1	1	1	1	0	0	0	1	1	1	1	1	1	0	0	0	0	0	0
C1TM_HUMAN	Monofunctional C1-tetrahydrofolate synthase, mitochondrial OS=Homo sapiens GN=MTHFD1L PE=1 SV=1	1.574	0.409	0.125051	1	1	1	0	0	0	2	2	1	1	1	0	1	1	0	0	0	0	0	0	0	1	1	0	1	1	0	1	1	0	1	1	0	1	1	0	1	1	0	1	1	0	1	1	0
PRP4_HUMAN	U4/U6 small nuclear ribonucleoprotein Prp4 OS=Homo sapiens GN=PRPF4 PE=1 SV=2	2.057	0.6757	0.06107	2	2	2	0	0	0	0	0	0	1	1	1	0	0	0	2	2	2	0	0	0	0	0	0	1	1	1	0	0	0	0	0	0	1	1	1	0	0	0	0	0	0	1	1	1
COX6C_HUMAN	Cytochrome c oxidase subunit 6C OS=Homo sapiens GN=COX6C PE=1 SV=2	1.564	0.3555	0.165536	1	1	1	0	0	0	0	0	0	1	1	1	0	0	0	0	0	0	0	0	0	0	0	0	0	0	0	0	0	0	0	0	0	0	0	0	0	0	0	0	0	0	0	0	0
IF4E_HUMAN	Eukaryotic translation initiation factor 4E OS=Homo sapiens GN=EIF4E PE=1 SV=2	1.654	0.3349	0.715462	1	1	1	0	0	0	1	1	1	1	1	1	1	1	1	0	0	0	0	0	0	1	1	1	1	1	1	0	0	0	0	0	0	0	0	0	1	1	1	0	0	0	0	0	0
DYN2_HUMAN	Dynamin-2 OS=Homo sapiens GN=DNM2 PE=1 SV=2	1.832	0.6307	0.008469	2	2	0	1	1	1	2	2	0	1	1	1	0	0	0	1	1	0	0	0	0	0	0	0	0	0	0	0	0	0	0	0	0	0	0	0	0	0	0	0	0	0	0	0	0
LAC2_HUMAN	Ig lambda-2 chain C regions OS=Homo sapiens GN=IGLC2 PE=1 SV=1	2.245	0.4596	0.167974	0	0	0	0	0	0	0	0	0	0	0	0	0	0	0	0	0	0	0	0	0	0	0	0	0	0	0	0	0	0	0	0	0	1	1	0	0	0	0	0	0	0	0	0	0
THOP1_HUMAN	Thimet oligopeptidase OS=Homo sapiens GN=THOP1 PE=1 SV=2	2.426	0.6735	0.022928	1	1	1	1	1	1	1	1	1	1	1	1	0	0	0	1	1	1	1	1	1	1	1	1	0	0	0	0	0	0	0	0	0	0	0	0	2	2	2	0	0	0	0	0	0
PSA2_HUMAN	Proteasome subunit alpha type-2 OS=Homo sapiens GN=PSMA2 PE=1 SV=2	2.896	0.6529	0.009881	6	5	5	1	1	1	5	5	5	3	3	3	4	4	4	3	3	3	2	2	2	3	3	3	2	2	2	2	2	2	2	2	2	1	1	1	3	3	3	2	2	2	3	3	3
RBM28_HUMAN	RNA-binding protein 28 OS=Homo sapiens GN=RBM28 PE=1 SV=3	1.83	0.6104	0.449071	0	0	0	0	0	0	0	0	0	0	0	0	0	0	0	1	1	1	0	0	0	0	0	0	0	0	0	0	0	0	0	0	0	0	0	0	0	0	0	0	0	0	0	0	0
PP6R3_HUMAN	Serine/threonine-protein phosphatase 6 regulatory subunit 3 OS=Homo sapiens GN=PPP6R3 PE=1 SV=2	2.326	0.7451	0.055432	3	3	3	0	0	0	1	1	1	1	1	1	0	0	0	0	0	0	0	0	0	0	0	0	0	0	0	0	0	0	0	0	0	0	0	0	0	0	0	0	0	0	1	1	1
MYL6B_HUMAN	Myosin light chain 6B OS=Homo sapiens GN=MYL6B PE=1 SV=1	2.9	0.6897	0.003971	1	1	0	0	0	0	1	1	0	1	1	0	1	1	0	1	1	0	0	0	0	1	1	0	1	1	0	1	1	0	1	1	0	1	1	0	0	0	0	1	1	0	1	1	0
KATL2_HUMAN	Katanin p60 ATPase-containing subunit A-like 2 OS=Homo sapiens GN=KATNAL2 PE=2 SV=3	2.727	0.6216	0.005441	1	1	1	1	1	1	1	1	1	1	1	1	0	0	0	1	1	1	0	0	0	0	0	0	1	1	1	0	0	0	0	0	0	1	1	1	0	0	0	0	0	0	0	0	0
MYO1E_HUMAN	Unconventional myosin-Ie OS=Homo sapiens GN=MYO1E PE=1 SV=2	2.587	0.5717	0.021757	2	2	1	0	0	0	0	0	0	2	2	1	0	0	0	1	1	1	0	0	0	0	0	0	4	4	3	0	0	0	0	0	0	1	1	1	0	0	0	0	0	0	0	0	0
HCFC2_HUMAN	Host cell factor 2 OS=Homo sapiens GN=HCFC2 PE=1 SV=1	1.349	0.5136	0.859661	0	0	0	0	0	0	0	0	0	1	1	0	0	0	0	0	0	0	0	0	0	0	0	0	0	0	0	1	1	0	0	0	0	0	0	0	0	0	0	0	0	0	0	0	0
EHD1_HUMAN	EH domain-containing protein 1 OS=Homo sapiens GN=EHD1 PE=1 SV=2	2.431	0.561	0.234958	5	5	4	0	0	0	1	1	1	0	0	0	0	0	0	0	0	0	0	0	0	0	0	0	0	0	0	0	0	0	0	0	0	0	0	0	0	0	0	0	0	0	0	0	0
PSA7L_HUMAN	Proteasome subunit alpha type-7-like OS=Homo sapiens GN=PSMA8 PE=1 SV=3	2.843	0.6649	0.045083	3	3	0	3	3	0	4	4	0	0	0	0	0	0	0	1	1	0	0	0	0	0	0	0	0	0	0	0	0	0	0	0	0	0	0	0	0	0	0	0	0	0	0	0	0
FAS_HUMAN	Fatty acid synthase OS=Homo sapiens GN=FASN PE=1 SV=3	3.271	0.721	0.006965	32	30	30	23	23	23	34	33	33	30	28	28	11	11	11	24	24	24	5	5	5	14	14	14	24	23	23	18	18	18	6	6	6	18	18	18	20	20	20	3	3	3	17	17	17
ASAH1_HUMAN	Acid ceramidase OS=Homo sapiens GN=ASAH1 PE=1 SV=5	2.27	0.6004	0.297364	0	0	0	0	0	0	0	0	0	0	0	0	0	0	0	0	0	0	0	0	0	0	0	0	0	0	0	0	0	0	0	0	0	0	0	0	0	0	0	0	0	0	0	0	0
HV307_HUMAN	Ig heavy chain V-III region CAM OS=Homo sapiens PE=1 SV=1	1.928	0.3422	0.00165	0	0	0	0	0	0	0	0	0	0	0	0	1	1	0	0	0	0	0	0	0	0	0	0	0	0	0	0	0	0	0	0	0	1	1	0	0	0	0	0	0	0	0	0	0
SEPT6_HUMAN	Septin-6 OS=Homo sapiens GN=SEPT6 PE=1 SV=4	1.684	0.521	0.047272	3	3	0	0	0	0	0	0	0	0	0	0	1	1	0	1	1	0	0	0	0	1	1	0	1	1	0	0	0	0	0	0	0	1	1	0	1	1	0	0	0	0	1	1	0
SYTC2_HUMAN	Probable threonine--tRNA ligase 2, cytoplasmic OS=Homo sapiens GN=TARSL2 PE=1 SV=1	1.693	0.3375	0.252674	1	1	0	0	0	0	0	0	0	1	1	0	0	0	0	0	0	0	0	0	0	0	0	0	0	0	0	0	0	0	0	0	0	0	0	0	0	0	0	0	0	0	0	0	0
MAGA1_HUMAN	Melanoma-associated antigen 1 OS=Homo sapiens GN=MAGEA1 PE=1 SV=1	1.655	0.5631	0.260915	3	3	1	0	0	0	0	0	0	0	0	0	0	0	0	0	0	0	0	0	0	0	0	0	0	0	0	0	0	0	0	0	0	0	0	0	0	0	0	0	0	0	0	0	0
ZN675_HUMAN	Zinc finger protein 675 OS=Homo sapiens GN=ZNF675 PE=1 SV=3	1.162	0.185	0.343326	1	1	1	0	0	0	0	0	0	0	0	0	0	0	0	0	0	0	0	0	0	0	0	0	0	0	0	0	0	0	0	0	0	0	0	0	0	0	0	0	0	0	0	0	0
SEPT2_HUMAN	Septin-2 OS=Homo sapiens GN=SEPT2 PE=1 SV=1	2.114	0.614	0.377255	1	1	1	0	0	0	2	2	2	0	0	0	0	0	0	0	0	0	0	0	0	0	0	0	0	0	0	0	0	0	0	0	0	0	0	0	0	0	0	0	0	0	0	0	0
CALD1_HUMAN	Caldesmon OS=Homo sapiens GN=CALD1 PE=1 SV=3	3.86	0.7198	0.009212	9	9	9	5	5	5	6	6	6	8	8	7	4	4	4	6	6	6	1	1	1	4	4	4	9	9	9	6	6	6	3	3	3	5	5	5	6	6	6	3	3	3	6	6	6
PSMD5_HUMAN	26S proteasome non-ATPase regulatory subunit 5 OS=Homo sapiens GN=PSMD5 PE=1 SV=3	1.954	0.5301	0.353987	3	3	3	0	0	0	1	1	1	1	1	1	0	0	0	0	0	0	0	0	0	0	0	0	0	0	0	0	0	0	0	0	0	0	0	0	0	0	0	0	0	0	0	0	0
TXND9_HUMAN	Thioredoxin domain-containing protein 9 OS=Homo sapiens GN=TXNDC9 PE=1 SV=2	1.501	0.5863	0.192661	0	0	0	0	0	0	0	0	0	0	0	0	0	0	0	1	1	1	0	0	0	0	0	0	1	1	1	0	0	0	0	0	0	0	0	0	0	0	0	0	0	0	0	0	0
ACYP2_HUMAN	Acylphosphatase-2 OS=Homo sapiens GN=ACYP2 PE=1 SV=2	1.795	0.6457	0.182728	0	0	0	0	0	0	0	0	0	1	1	1	0	0	0	0	0	0	0	0	0	0	0	0	1	1	1	2	2	2	0	0	0	1	1	1	0	0	0	0	0	0	0	0	0
PLEC_HUMAN	Plectin OS=Homo sapiens GN=PLEC PE=1 SV=3	3.814	0.7892	0.000268	111	109	105	62	60	57	107	103	100	85	82	79	58	56	55	84	82	80	39	38	36	51	50	48	132	116	114	74	73	71	38	38	36	82	80	78	75	74	71	30	30	29	55	54	53
1433T_HUMAN	14-3-3 protein theta OS=Homo sapiens GN=YWHAQ PE=1 SV=1	3.979	0.7221	0.002362	10	6	2	4	3	1	9	6	2	7	4	1	4	3	1	8	5	1	3	3	1	3	2	1	4	3	1	8	4	1	2	2	1	3	2	1	11	3	1	5	3	1	5	2	1
PTGR1_HUMAN	Prostaglandin reductase 1 OS=Homo sapiens GN=PTGR1 PE=1 SV=2	2.187	0.4856	0.019386	0	0	0	0	0	0	0	0	0	0	0	0	0	0	0	0	0	0	0	0	0	0	0	0	0	0	0	0	0	0	0	0	0	0	0	0	1	1	1	0	0	0	0	0	0
LIPL_HUMAN	Lipoprotein lipase OS=Homo sapiens GN=LPL PE=1 SV=1	2.069	0.4811	0.70778	0	0	0	2	2	2	0	0	0	0	0	0	0	0	0	0	0	0	0	0	0	0	0	0	0	0	0	0	0	0	0	0	0	0	0	0	0	0	0	0	0	0	0	0	0
HNRCL_HUMAN	Heterogeneous nuclear ribonucleoprotein C-like 1 OS=Homo sapiens GN=HNRNPCL1 PE=1 SV=1	3.235	0.6797	0.015568	10	8	0	7	6	0	8	7	0	9	6	0	7	5	0	10	7	0	2	2	0	8	4	0	8	5	0	7	6	0	3	3	0	7	5	0	9	5	0	4	4	0	7	4	0
PLCB3_HUMAN	1-phosphatidylinositol 4,5-bisphosphate phosphodiesterase beta-3 OS=Homo sapiens GN=PLCB3 PE=1 SV=2	1.537	0.529	0.333516	1	1	1	0	0	0	1	1	1	0	0	0	0	0	0	0	0	0	0	0	0	0	0	0	1	1	1	0	0	0	0	0	0	0	0	0	0	0	0	0	0	0	0	0	0
SRSF9_HUMAN	Serine/arginine-rich splicing factor 9 OS=Homo sapiens GN=SRSF9 PE=1 SV=1	2.116	0.6867	0.027179	1	1	1	1	1	1	0	0	0	2	1	1	0	0	0	2	2	2	0	0	0	0	0	0	4	4	4	1	1	1	0	0	0	1	1	1	2	2	2	0	0	0	0	0	0
CAP2_HUMAN	Adenylyl cyclase-associated protein 2 OS=Homo sapiens GN=CAP2 PE=1 SV=1	1.515	0.314	1.12949	1	1	0	0	0	0	2	2	0	0	0	0	0	0	0	0	0	0	0	0	0	0	0	0	0	0	0	0	0	0	0	0	0	0	0	0	0	0	0	0	0	0	0	0	0
CJ067_HUMAN	Uncharacterized protein C10orf67 OS=Homo sapiens GN=C10orf67 PE=2 SV=2	1.445	0.1931	0.096328	0	0	0	0	0	0	0	0	0	0	0	0	0	0	0	0	0	0	0	0	0	1	1	1	0	0	0	0	0	0	0	0	0	0	0	0	0	0	0	0	0	0	0	0	0
COX41_HUMAN	Cytochrome c oxidase subunit 4 isoform 1, mitochondrial OS=Homo sapiens GN=COX4I1 PE=1 SV=1	2.443	0.5808	0.083669	2	2	2	2	2	2	3	3	3	1	1	1	0	0	0	4	4	4	1	1	1	1	1	1	1	1	1	1	1	1	0	0	0	2	2	2	2	2	2	1	1	1	1	1	1
RL35_HUMAN	60S ribosomal protein L35 OS=Homo sapiens GN=RPL35 PE=1 SV=2	1.346	0.2786	0.279258	0	0	0	0	0	0	0	0	0	0	0	0	0	0	0	0	0	0	0	0	0	0	0	0	0	0	0	1	1	1	0	0	0	0	0	0	0	0	0	0	0	0	0	0	0
TGM1_HUMAN	Protein-glutamine gamma-glutamyltransferase K OS=Homo sapiens GN=TGM1 PE=1 SV=4	4.788	0.7304	0.0763	0	0	0	0	0	0	0	0	0	0	0	0	1	1	1	0	0	0	1	1	1	0	0	0	0	0	0	0	0	0	0	0	0	1	1	1	0	0	0	1	1	1	0	0	0
LC7L2_HUMAN	Putative RNA-binding protein Luc7-like 2 OS=Homo sapiens GN=LUC7L2 PE=1 SV=2	1.653	0.6184	0.309022	0	0	0	1	1	0	0	0	0	0	0	0	0	0	0	0	0	0	0	0	0	0	0	0	0	0	0	2	2	2	0	0	0	0	0	0	0	0	0	0	0	0	0	0	0
SC11A_HUMAN	Signal peptidase complex catalytic subunit SEC11A OS=Homo sapiens GN=SEC11A PE=1 SV=1	1.741	0.2769	0.455483	1	1	1	0	0	0	0	0	0	0	0	0	0	0	0	0	0	0	0	0	0	0	0	0	0	0	0	0	0	0	0	0	0	0	0	0	0	0	0	0	0	0	0	0	0
TUT4_HUMAN	Terminal uridylyltransferase 4 OS=Homo sapiens GN=ZCCHC11 PE=1 SV=3	1.188	0.1431	2.3788	0	0	0	0	0	0	0	0	0	0	0	0	0	0	0	0	0	0	0	0	0	0	0	0	0	0	0	0	0	0	0	0	0	0	0	0	0	0	0	0	0	0	0	0	0
TGM3_HUMAN	Protein-glutamine gamma-glutamyltransferase E OS=Homo sapiens GN=TGM3 PE=1 SV=4	3.119	0.7178	0.067881	2	2	2	0	0	0	1	1	1	1	1	1	5	5	5	2	2	2	0	0	0	3	3	3	1	1	1	0	0	0	4	4	4	1	1	1	0	0	0	1	1	1	0	0	0
PDIA4_HUMAN	Protein disulfide-isomerase A4 OS=Homo sapiens GN=PDIA4 PE=1 SV=2	2.868	0.7704	0.018084	8	7	7	0	0	0	7	7	7	9	9	9	3	3	3	9	9	9	0	0	0	8	8	8	7	7	7	5	5	5	0	0	0	6	6	6	9	9	9	4	4	4	3	3	3
KBP_HUMAN	KIF1-binding protein OS=Homo sapiens GN=KIAA1279 PE=1 SV=1	1.117	0.2023	0.64429	0	0	0	0	0	0	0	0	0	0	0	0	0	0	0	1	1	1	0	0	0	0	0	0	0	0	0	0	0	0	0	0	0	0	0	0	0	0	0	0	0	0	0	0	0
1A25_HUMAN	HLA class I histocompatibility antigen, A-25 alpha chain OS=Homo sapiens GN=HLA-A PE=2 SV=1	2.621	0.7085	0.054574	1	1	0	1	1	0	2	2	0	0	0	0	0	0	0	1	1	0	0	0	0	0	0	0	0	0	0	0	0	0	0	0	0	0	0	0	1	1	0	1	1	0	0	0	0
NELFE_HUMAN	Negative elongation factor E OS=Homo sapiens GN=RDBP PE=1 SV=3	1.478	0.6651	0.497232	0	0	0	0	0	0	0	0	0	0	0	0	0	0	0	1	1	1	0	0	0	0	0	0	0	0	0	0	0	0	0	0	0	0	0	0	0	0	0	0	0	0	0	0	0
ANXA5_HUMAN	Annexin A5 OS=Homo sapiens GN=ANXA5 PE=1 SV=2	2.549	0.5813	0.007608	7	6	6	1	1	1	5	4	4	7	5	5	1	1	1	8	7	7	2	2	2	3	2	2	2	2	2	6	5	5	0	0	0	5	4	4	8	6	6	2	2	2	3	2	2
S10A9_HUMAN	Protein S100-A9 OS=Homo sapiens GN=S100A9 PE=1 SV=1	2.484	0.4702	1.19376	0	0	0	0	0	0	0	0	0	0	0	0	0	0	0	0	0	0	1	1	1	0	0	0	0	0	0	0	0	0	0	0	0	0	0	0	0	0	0	0	0	0	0	0	0
ROA0_HUMAN	Heterogeneous nuclear ribonucleoprotein A0 OS=Homo sapiens GN=HNRNPA0 PE=1 SV=1	4.133	0.7305	0.020376	6	5	5	2	2	2	6	6	6	6	4	4	3	3	3	3	3	3	4	4	4	2	2	2	3	3	3	7	4	4	2	2	2	3	3	3	4	4	4	2	2	2	3	3	3
COASY_HUMAN	Bifunctional coenzyme A synthase OS=Homo sapiens GN=COASY PE=1 SV=4	2.378	0.5379	0.350937	0	0	0	0	0	0	0	0	0	0	0	0	0	0	0	2	2	2	0	0	0	0	0	0	0	0	0	1	1	1	0	0	0	0	0	0	1	1	1	0	0	0	0	0	0
GORS2_HUMAN	Golgi reassembly-stacking protein 2 OS=Homo sapiens GN=GORASP2 PE=1 SV=3	1.899	0.4839	0.229933	0	0	0	0	0	0	1	1	0	0	0	0	1	1	0	1	1	0	0	0	0	1	1	0	1	1	0	0	0	0	0	0	0	1	1	0	1	1	0	1	1	0	1	1	0
IL18_HUMAN	Interleukin-18 OS=Homo sapiens GN=IL18 PE=1 SV=1	2.195	0.5827	0.046409	1	1	1	1	1	1	2	2	2	2	2	2	2	2	2	3	3	3	0	0	0	1	1	1	3	3	3	2	2	2	1	1	1	1	1	1	2	2	2	0	0	0	1	1	1
FACE1_HUMAN	CAAX prenyl protease 1 homolog OS=Homo sapiens GN=ZMPSTE24 PE=1 SV=2	1.66	0.5029	0.053712	1	1	1	0	0	0	0	0	0	3	3	3	0	0	0	2	2	2	0	0	0	0	0	0	1	1	1	1	1	1	0	0	0	0	0	0	2	2	2	0	0	0	0	0	0
RL12_HUMAN	60S ribosomal protein L12 OS=Homo sapiens GN=RPL12 PE=1 SV=1	2.503	0.5806	0.021984	3	3	3	0	0	0	4	3	3	3	2	2	3	2	2	2	1	1	1	1	1	3	2	2	4	3	3	3	2	2	0	0	0	4	3	3	3	2	2	2	2	2	4	2	2
YH007_HUMAN	Uncharacterized protein FLJ40521 OS=Homo sapiens PE=1 SV=1	1.498	0.2497	0.444539	0	0	0	0	0	0	0	0	0	1	1	1	0	0	0	0	0	0	0	0	0	0	0	0	0	0	0	0	0	0	0	0	0	1	1	1	0	0	0	0	0	0	0	0	0
ATX2_HUMAN	Ataxin-2 OS=Homo sapiens GN=ATXN2 PE=1 SV=2	1.674	0.5568	0.200241	1	1	1	0	0	0	0	0	0	0	0	0	0	0	0	0	0	0	0	0	0	0	0	0	0	0	0	0	0	0	0	0	0	0	0	0	0	0	0	0	0	0	0	0	0
SYQ_HUMAN	Glutamine--tRNA ligase OS=Homo sapiens GN=QARS PE=1 SV=1	4.018	0.7449	0.000446	38	28	26	27	23	22	38	33	33	7	7	6	1	1	1	7	7	6	4	4	3	3	3	3	6	6	4	7	7	6	1	1	1	4	4	4	3	3	3	3	3	3	4	4	4
RAC2_HUMAN	Ras-related C3 botulinum toxin substrate 2 OS=Homo sapiens GN=RAC2 PE=1 SV=1	2.338	0.5304	0.013025	2	2	0	0	0	0	1	1	0	2	2	0	2	2	0	2	2	0	1	1	0	1	1	0	2	2	0	1	1	0	0	0	0	2	2	0	2	2	0	0	0	0	2	2	0
FAF1_HUMAN	FAS-associated factor 1 OS=Homo sapiens GN=FAF1 PE=1 SV=2	2.43	0.5722	0.211123	1	1	1	1	1	1	4	4	4	0	0	0	0	0	0	2	2	2	0	0	0	2	2	2	1	1	1	0	0	0	0	0	0	0	0	0	1	1	1	0	0	0	0	0	0
RU2A_HUMAN	U2 small nuclear ribonucleoprotein A' OS=Homo sapiens GN=SNRPA1 PE=1 SV=2	3.276	0.7139	0.002114	13	11	11	8	7	7	13	10	10	8	7	7	5	5	5	9	7	7	5	4	4	6	6	6	9	6	6	14	7	7	4	3	3	10	7	7	10	7	7	4	4	4	9	5	5
NKAP_HUMAN	NF-kappa-B-activating protein OS=Homo sapiens GN=NKAP PE=1 SV=1	1.132	0.2641	1.34001	0	0	0	1	1	0	0	0	0	0	0	0	0	0	0	0	0	0	0	0	0	0	0	0	0	0	0	0	0	0	0	0	0	0	0	0	0	0	0	0	0	0	0	0	0
EXOS8_HUMAN	Exosome complex component RRP43 OS=Homo sapiens GN=EXOSC8 PE=1 SV=1	2.102	0.6167	0.520896	0	0	0	0	0	0	0	0	0	1	1	1	0	0	0	2	2	2	0	0	0	0	0	0	1	1	1	0	0	0	1	1	1	0	0	0	1	1	1	0	0	0	0	0	0
TBD2A_HUMAN	TBC1 domain family member 2A OS=Homo sapiens GN=TBC1D2 PE=1 SV=3	1.636	0.1604	1.34223	0	0	0	0	0	0	0	0	0	1	1	0	0	0	0	0	0	0	0	0	0	0	0	0	0	0	0	1	1	0	0	0	0	0	0	0	0	0	0	0	0	0	0	0	0
RN114_HUMAN	RING finger protein 114 OS=Homo sapiens GN=RNF114 PE=1 SV=1	1.793	0.3245	0.16014	0	0	0	0	0	0	1	1	1	0	0	0	0	0	0	1	1	1	0	0	0	1	1	1	1	1	1	0	0	0	0	0	0	0	0	0	0	0	0	0	0	0	1	1	1
LAMP1_HUMAN	Lysosome-associated membrane glycoprotein 1 OS=Homo sapiens GN=LAMP1 PE=1 SV=3	1.96	0.3416	0.169687	0	0	0	0	0	0	0	0	0	0	0	0	0	0	0	1	1	1	0	0	0	0	0	0	0	0	0	0	0	0	0	0	0	1	1	1	0	0	0	0	0	0	0	0	0
LANC1_HUMAN	LanC-like protein 1 OS=Homo sapiens GN=LANCL1 PE=1 SV=1	2.647	0.6275	0.001412	4	4	4	4	4	4	2	2	2	3	3	3	1	1	1	1	1	1	0	0	0	2	2	2	1	1	1	3	2	2	1	1	1	1	1	1	4	3	3	0	0	0	2	2	2
SERB_HUMAN	Phosphoserine phosphatase OS=Homo sapiens GN=PSPH PE=1 SV=2	1.104	0.3333	1.75484	1	1	1	0	0	0	0	0	0	0	0	0	0	0	0	0	0	0	0	0	0	0	0	0	0	0	0	0	0	0	0	0	0	0	0	0	0	0	0	0	0	0	0	0	0
DHSO_HUMAN	Sorbitol dehydrogenase OS=Homo sapiens GN=SORD PE=1 SV=4	1.954	0.5391	0.162306	0	0	0	0	0	0	0	0	0	1	1	1	0	0	0	0	0	0	0	0	0	0	0	0	1	1	1	0	0	0	0	0	0	0	0	0	0	0	0	0	0	0	0	0	0
EHD3_HUMAN	EH domain-containing protein 3 OS=Homo sapiens GN=EHD3 PE=1 SV=2	1.814	0.5017	0.345812	1	1	0	0	0	0	0	0	0	0	0	0	0	0	0	0	0	0	0	0	0	0	0	0	0	0	0	0	0	0	0	0	0	0	0	0	0	0	0	0	0	0	0	0	0
K1C24_HUMAN	Keratin, type I cytoskeletal 24 OS=Homo sapiens GN=KRT24 PE=1 SV=1	2.61	0.6251	0.001148	9	3	0	9	3	0	6	3	0	18	4	0	14	4	0	7	3	0	32	4	0	21	4	0	11	3	0	13	2	0	14	3	0	12	3	0	11	3	0	14	3	0	12	2	0
HV305_HUMAN	Ig heavy chain V-III region BRO OS=Homo sapiens PE=1 SV=1	1.928	0.3422	0.00165	0	0	0	0	0	0	0	0	0	0	0	0	1	1	0	0	0	0	0	0	0	0	0	0	0	0	0	0	0	0	0	0	0	1	1	0	0	0	0	0	0	0	0	0	0
K6PF_HUMAN	6-phosphofructokinase, muscle type OS=Homo sapiens GN=PFKM PE=1 SV=2	1.896	0.4933	0.04256	1	1	0	1	1	0	3	3	2	1	1	0	1	1	0	2	2	1	1	1	0	1	1	0	2	2	1	2	1	0	2	2	1	2	2	1	2	1	0	2	2	1	1	1	0
RBM15_HUMAN	Putative RNA-binding protein 15 OS=Homo sapiens GN=RBM15 PE=1 SV=2	1.612	0.6185	0.388822	0	0	0	0	0	0	0	0	0	0	0	0	0	0	0	1	1	1	0	0	0	0	0	0	0	0	0	0	0	0	0	0	0	0	0	0	0	0	0	0	0	0	0	0	0
GORS1_HUMAN	Golgi reassembly-stacking protein 1 OS=Homo sapiens GN=GORASP1 PE=1 SV=3	1.899	0.4839	0.229933	0	0	0	0	0	0	1	1	0	0	0	0	1	1	0	1	1	0	0	0	0	1	1	0	1	1	0	0	0	0	0	0	0	1	1	0	1	1	0	1	1	0	1	1	0
LEG1_HUMAN	Galectin-1 OS=Homo sapiens GN=LGALS1 PE=1 SV=2	2.831	0.7169	0.062816	4	4	4	2	2	2	5	5	5	3	3	3	3	3	3	6	6	6	1	1	1	4	4	4	4	4	4	3	3	3	2	2	2	5	5	5	4	4	4	1	1	1	3	3	3
EFTU_HUMAN	Elongation factor Tu, mitochondrial OS=Homo sapiens GN=TUFM PE=1 SV=2	3.367	0.7399	0.003386	12	11	11	3	3	3	10	10	10	10	10	10	7	6	6	12	10	10	3	3	3	4	4	4	11	10	10	7	7	7	1	1	1	8	8	8	11	10	10	4	4	4	6	6	6
SPTC1_HUMAN	Serine palmitoyltransferase 1 OS=Homo sapiens GN=SPTLC1 PE=1 SV=1	2.787	0.62	0.014886	2	2	2	0	0	0	2	2	2	0	0	0	0	0	0	0	0	0	0	0	0	0	0	0	0	0	0	0	0	0	0	0	0	0	0	0	1	1	1	0	0	0	0	0	0
CHIP_HUMAN	E3 ubiquitin-protein ligase CHIP OS=Homo sapiens GN=STUB1 PE=1 SV=2	2.838	0.6311	0.535895	0	0	0	0	0	0	0	0	0	1	1	1	0	0	0	0	0	0	0	0	0	0	0	0	1	1	1	0	0	0	0	0	0	0	0	0	0	0	0	0	0	0	0	0	0
SYNRG_HUMAN	Synergin gamma OS=Homo sapiens GN=SYNRG PE=1 SV=2	1.549	0.1885	0.671449	0	0	0	0	0	0	0	0	0	1	1	0	0	0	0	0	0	0	0	0	0	0	0	0	1	1	0	0	0	0	0	0	0	0	0	0	0	0	0	0	0	0	0	0	0
KRT38_HUMAN	Keratin, type I cuticular Ha8 OS=Homo sapiens GN=KRT38 PE=2 SV=3	1.844	0.5049	0.004186	2	1	0	6	1	0	5	2	0	6	1	0	9	1	0	4	1	0	22	1	0	14	1	0	7	1	0	9	1	0	11	1	0	6	1	0	4	1	0	12	1	0	10	1	0
NNTM_HUMAN	NAD(P) transhydrogenase, mitochondrial OS=Homo sapiens GN=NNT PE=1 SV=3	2.152	0.6245	0.138836	1	1	1	0	0	0	0	0	0	0	0	0	0	0	0	4	4	4	0	0	0	0	0	0	1	1	1	2	2	2	0	0	0	1	1	1	2	2	2	0	0	0	0	0	0
LAP2A_HUMAN	Lamina-associated polypeptide 2, isoform alpha OS=Homo sapiens GN=TMPO PE=1 SV=2	2.018	0.7087	0.107414	4	4	1	2	2	1	3	3	0	1	1	1	0	0	0	4	4	1	0	0	0	0	0	0	4	4	0	0	0	0	0	0	0	1	1	1	1	1	0	0	0	0	0	0	0
DECR_HUMAN	2,4-dienoyl-CoA reductase, mitochondrial OS=Homo sapiens GN=DECR1 PE=1 SV=1	1.613	0.4476	1.11686	0	0	0	0	0	0	0	0	0	1	1	1	0	0	0	0	0	0	0	0	0	0	0	0	0	0	0	0	0	0	0	0	0	0	0	0	0	0	0	0	0	0	0	0	0
ODPB_HUMAN	Pyruvate dehydrogenase E1 component subunit beta, mitochondrial OS=Homo sapiens GN=PDHB PE=1 SV=3	2.198	0.5851	0.050474	3	3	3	0	0	0	2	2	2	2	2	2	0	0	0	3	3	3	0	0	0	0	0	0	2	2	2	0	0	0	0	0	0	1	1	1	2	2	2	0	0	0	0	0	0
NOG1_HUMAN	Nucleolar GTP-binding protein 1 OS=Homo sapiens GN=GTPBP4 PE=1 SV=3	1.973	0.4972	0.090959	0	0	0	0	0	0	0	0	0	1	1	1	0	0	0	0	0	0	0	0	0	0	0	0	0	0	0	2	2	2	0	0	0	0	0	0	0	0	0	0	0	0	0	0	0
1C08_HUMAN	HLA class I histocompatibility antigen, Cw-8 alpha chain OS=Homo sapiens GN=HLA-C PE=2 SV=1	2.621	0.7085	0.423033	1	1	0	0	0	0	1	1	0	0	0	0	0	0	0	0	0	0	0	0	0	0	0	0	0	0	0	0	0	0	0	0	0	0	0	0	0	0	0	0	0	0	0	0	0
RTCB_HUMAN	tRNA-splicing ligase RtcB homolog OS=Homo sapiens GN=C22orf28 PE=1 SV=1	2.58	0.731	0.026976	3	3	3	0	0	0	3	3	3	2	2	2	1	1	1	2	2	2	0	0	0	1	1	1	4	4	4	1	1	1	1	1	1	1	1	1	2	2	2	0	0	0	0	0	0
FRG1B_HUMAN	Protein FRG1B OS=Homo sapiens GN=FRG1B PE=2 SV=1	2.203	0.6096	0.001583	1	1	0	0	0	0	1	1	0	1	1	0	0	0	0	1	1	0	0	0	0	1	1	0	0	0	0	1	1	0	1	1	0	1	1	0	1	1	0	0	0	0	0	0	0
SKP1_HUMAN	S-phase kinase-associated protein 1 OS=Homo sapiens GN=SKP1 PE=1 SV=2	2.965	0.7467	0.01815	2	2	2	1	1	1	0	0	0	1	1	1	1	1	1	1	1	1	0	0	0	1	1	1	1	1	1	1	1	1	1	1	1	1	1	1	1	1	1	1	1	1	1	1	1
1A68_HUMAN	HLA class I histocompatibility antigen, A-68 alpha chain OS=Homo sapiens GN=HLA-A PE=1 SV=4	2.621	0.7085	0.054574	2	2	1	1	1	0	2	2	0	0	0	0	0	0	0	2	2	0	0	0	0	0	0	0	0	0	0	0	0	0	0	0	0	0	0	0	1	1	0	1	1	0	0	0	0
MYH7_HUMAN	Myosin-7 OS=Homo sapiens GN=MYH7 PE=1 SV=5	1.991	0.3014	0.224977	0	0	0	0	0	0	0	0	0	0	0	0	0	0	0	0	0	0	1	1	0	0	0	0	0	0	0	0	0	0	0	0	0	0	0	0	0	0	0	0	0	0	0	0	0
IMA1_HUMAN	Importin subunit alpha-1 OS=Homo sapiens GN=KPNA1 PE=1 SV=3	2.949	0.4334	0.100788	1	1	1	1	1	1	2	2	1	2	2	1	0	0	0	1	1	1	0	0	0	0	0	0	1	1	1	1	1	1	0	0	0	0	0	0	1	1	1	0	0	0	0	0	0
KCRM_HUMAN	Creatine kinase M-type OS=Homo sapiens GN=CKM PE=1 SV=2	2.15	0.5035	0.522933	0	0	0	0	0	0	0	0	0	0	0	0	0	0	0	1	1	0	1	1	1	0	0	0	0	0	0	0	0	0	0	0	0	0	0	0	1	1	0	0	0	0	0	0	0
RAP2C_HUMAN	Ras-related protein Rap-2c OS=Homo sapiens GN=RAP2C PE=1 SV=1	1.769	0.3669	0.335265	0	0	0	0	0	0	1	1	1	0	0	0	0	0	0	0	0	0	0	0	0	0	0	0	0	0	0	0	0	0	0	0	0	0	0	0	0	0	0	0	0	0	0	0	0
F74A3_HUMAN	Putative protein FAM74A3 OS=Homo sapiens GN=FAM74A3 PE=5 SV=1	1.009	0.1754	0.422881	1	1	0	0	0	0	0	0	0	0	0	0	0	0	0	0	0	0	0	0	0	0	0	0	0	0	0	0	0	0	0	0	0	0	0	0	0	0	0	0	0	0	0	0	0
FEN1_HUMAN	Flap endonuclease 1 OS=Homo sapiens GN=FEN1 PE=1 SV=1	2.929	0.656	0.035663	4	4	4	0	0	0	2	2	2	4	4	4	0	0	0	3	3	3	2	2	2	2	2	2	5	5	5	1	1	1	2	2	2	1	1	1	4	4	4	1	1	1	2	2	2
RL13A_HUMAN	60S ribosomal protein L13a OS=Homo sapiens GN=RPL13A PE=1 SV=2	2.106	0.6771	0.056377	0	0	0	0	0	0	0	0	0	3	3	2	0	0	0	1	1	0	1	1	1	0	0	0	1	1	0	4	4	3	0	0	0	0	0	0	4	4	2	0	0	0	0	0	0
TCRG1_HUMAN	Transcription elongation regulator 1 OS=Homo sapiens GN=TCERG1 PE=1 SV=2	1.697	0.6279	0.116119	0	0	0	0	0	0	0	0	0	1	1	1	0	0	0	1	1	1	0	0	0	0	0	0	1	1	1	0	0	0	0	0	0	0	0	0	1	1	1	0	0	0	0	0	0
DPM1_HUMAN	Dolichol-phosphate mannosyltransferase OS=Homo sapiens GN=DPM1 PE=1 SV=1	1.481	0.5179	0.236385	0	0	0	0	0	0	0	0	0	0	0	0	0	0	0	1	1	1	0	0	0	1	1	1	1	1	1	0	0	0	0	0	0	0	0	0	1	1	1	0	0	0	0	0	0
NKRF_HUMAN	NF-kappa-B-repressing factor OS=Homo sapiens GN=NKRF PE=1 SV=2	2.037	0.4564	0.412092	0	0	0	0	0	0	0	0	0	0	0	0	0	0	0	1	1	1	0	0	0	1	1	1	0	0	0	0	0	0	0	0	0	1	1	1	0	0	0	0	0	0	1	1	1
AFG32_HUMAN	AFG3-like protein 2 OS=Homo sapiens GN=AFG3L2 PE=1 SV=2	2.305	0.5411	0.258638	2	2	2	0	0	0	3	3	3	2	2	2	0	0	0	0	0	0	0	0	0	0	0	0	0	0	0	0	0	0	0	0	0	0	0	0	0	0	0	0	0	0	0	0	0
KRT36_HUMAN	Keratin, type I cuticular Ha6 OS=Homo sapiens GN=KRT36 PE=1 SV=1	1.927	0.5049	0.004186	2	1	0	6	1	0	5	2	0	7	2	1	9	1	0	4	1	0	22	1	0	14	1	0	7	1	0	9	1	0	11	1	0	6	1	0	4	1	0	12	1	0	10	1	0
K1H2_HUMAN	Keratin, type I cuticular Ha2 OS=Homo sapiens GN=KRT32 PE=1 SV=3	2.959	0.7171	0.004186	2	1	0	6	1	0	8	5	0	7	2	0	10	2	0	4	1	0	22	1	0	14	1	0	7	1	0	9	1	0	11	1	0	6	1	0	4	1	0	12	1	0	10	1	0
KRT37_HUMAN	Keratin, type I cuticular Ha7 OS=Homo sapiens GN=KRT37 PE=2 SV=3	1.929	0.5049	0.004186	2	1	0	6	1	0	5	2	0	7	2	0	10	2	0	4	1	0	22	1	0	14	1	0	7	1	0	9	1	0	11	1	0	6	1	0	4	1	0	12	1	0	10	1	0
NIBAN_HUMAN	Protein Niban OS=Homo sapiens GN=FAM129A PE=1 SV=1	1.942	0.7327	0.116326	4	4	4	0	0	0	1	1	1	1	1	1	0	0	0	0	0	0	0	0	0	0	0	0	0	0	0	0	0	0	0	0	0	0	0	0	0	0	0	0	0	0	0	0	0
IF2B_HUMAN	Eukaryotic translation initiation factor 2 subunit 2 OS=Homo sapiens GN=EIF2S2 PE=1 SV=2	2.434	0.6647	0.004851	4	4	4	1	1	1	2	2	2	3	3	3	1	1	1	1	1	1	0	0	0	0	0	0	3	3	3	1	1	1	0	0	0	3	3	3	1	1	1	0	0	0	1	1	1
SF3A3_HUMAN	Splicing factor 3A subunit 3 OS=Homo sapiens GN=SF3A3 PE=1 SV=1	2.861	0.5633	0.086171	2	2	2	0	0	0	4	4	4	1	1	1	0	0	0	3	3	3	0	0	0	1	1	1	1	1	1	1	1	1	0	0	0	2	2	2	1	1	1	0	0	0	0	0	0
PPP6_HUMAN	Serine/threonine-protein phosphatase 6 catalytic subunit OS=Homo sapiens GN=PPP6C PE=1 SV=1	1.553	0.2776	0.141406	2	2	2	1	1	1	0	0	0	1	1	1	0	0	0	0	0	0	0	0	0	0	0	0	0	0	0	1	1	1	0	0	0	0	0	0	0	0	0	0	0	0	0	0	0
1433E_HUMAN	14-3-3 protein epsilon OS=Homo sapiens GN=YWHAE PE=1 SV=1	2.841	0.7562	0.004705	15	11	8	3	3	2	12	9	7	13	11	9	7	7	6	12	10	8	8	7	5	7	6	5	5	4	3	13	8	6	4	4	3	7	6	5	21	11	10	8	7	6	11	7	6
TLE4_HUMAN	Transducin-like enhancer protein 4 OS=Homo sapiens GN=TLE4 PE=1 SV=3	1.283	0.5289	0.012832	1	1	0	0	0	0	1	1	0	0	0	0	0	0	0	0	0	0	0	0	0	0	0	0	0	0	0	0	0	0	0	0	0	0	0	0	0	0	0	0	0	0	0	0	0
BLVRB_HUMAN	Flavin reductase (NADPH) OS=Homo sapiens GN=BLVRB PE=1 SV=3	2.764	0.5927	0.620356	1	1	1	0	0	0	0	0	0	1	1	1	0	0	0	1	1	1	0	0	0	0	0	0	2	1	1	0	0	0	0	0	0	0	0	0	1	1	1	0	0	0	0	0	0
KT33B_HUMAN	Keratin, type I cuticular Ha3-II OS=Homo sapiens GN=KRT33B PE=2 SV=3	2.198	0.6067	0.004186	2	1	0	6	1	0	11	8	2	9	4	0	10	2	0	4	1	0	22	1	0	15	2	0	7	1	0	9	1	0	12	2	0	6	1	0	4	1	0	12	1	0	10	1	0
KRT35_HUMAN	Keratin, type I cuticular Ha5 OS=Homo sapiens GN=KRT35 PE=2 SV=5	2.281	0.6067	0.000559	4	3	0	7	2	0	7	4	0	8	3	0	12	3	0	6	3	0	24	3	0	16	2	0	11	3	0	11	3	0	13	3	0	9	3	0	6	3	0	14	3	0	11	2	0
TWF1_HUMAN	Twinfilin-1 OS=Homo sapiens GN=TWF1 PE=1 SV=3	2.506	0.6826	0.053029	1	1	1	0	0	0	1	1	1	1	1	1	0	0	0	2	2	1	0	0	0	0	0	0	1	1	1	1	1	0	1	1	1	0	0	0	2	2	1	0	0	0	0	0	0
PLOD1_HUMAN	Procollagen-lysine,2-oxoglutarate 5-dioxygenase 1 OS=Homo sapiens GN=PLOD1 PE=1 SV=2	2.243	0.6095	0.141635	2	2	2	0	0	0	0	0	0	1	1	1	0	0	0	1	1	1	0	0	0	0	0	0	2	2	2	0	0	0	0	0	0	0	0	0	1	1	1	0	0	0	0	0	0
K1H1_HUMAN	Keratin, type I cuticular Ha1 OS=Homo sapiens GN=KRT31 PE=2 SV=3	2.959	0.7171	0.004186	2	1	0	6	1	0	10	7	0	8	3	0	11	3	0	4	1	0	22	1	0	14	1	0	7	1	0	9	1	0	11	1	0	6	1	0	4	1	0	12	1	0	10	1	0
PSPC1_HUMAN	Paraspeckle component 1 OS=Homo sapiens GN=PSPC1 PE=1 SV=1	1.631	0.2003	0.645762	0	0	0	0	0	0	0	0	0	1	1	0	0	0	0	0	0	0	0	0	0	0	0	0	1	1	0	0	0	0	0	0	0	0	0	0	0	0	0	0	0	0	0	0	0
DNJA1_HUMAN	DnaJ homolog subfamily A member 1 OS=Homo sapiens GN=DNAJA1 PE=1 SV=2	3.78	0.7688	0.011034	10	7	7	7	5	5	11	8	8	4	2	2	1	1	1	4	4	4	0	0	0	1	1	1	4	4	4	1	1	1	2	2	2	2	2	2	2	2	2	1	1	1	2	2	2
LS14A_HUMAN	Protein LSM14 homolog A OS=Homo sapiens GN=LSM14A PE=1 SV=3	3.035	0.5789	0.110194	0	0	0	0	0	0	0	0	0	1	1	1	1	1	1	0	0	0	0	0	0	0	0	0	2	2	2	0	0	0	1	1	1	0	0	0	1	1	1	0	0	0	0	0	0
THIM_HUMAN	3-ketoacyl-CoA thiolase, mitochondrial OS=Homo sapiens GN=ACAA2 PE=1 SV=2	1.656	0.5489	0.005303	0	0	0	0	0	0	0	0	0	0	0	0	1	1	1	1	1	1	1	1	1	0	0	0	2	2	2	1	1	1	1	1	1	1	1	1	1	1	1	1	1	1	1	1	1
LMAN2_HUMAN	Vesicular integral-membrane protein VIP36 OS=Homo sapiens GN=LMAN2 PE=1 SV=1	2.048	0.667	0.127443	2	2	2	0	0	0	0	0	0	1	1	1	0	0	0	1	1	1	0	0	0	0	0	0	0	0	0	0	0	0	0	0	0	0	0	0	1	1	1	0	0	0	0	0	0
CSTF3_HUMAN	Cleavage stimulation factor subunit 3 OS=Homo sapiens GN=CSTF3 PE=1 SV=1	2.091	0.6978	0.115838	2	2	2	0	0	0	0	0	0	0	0	0	0	0	0	1	1	1	0	0	0	0	0	0	0	0	0	0	0	0	0	0	0	1	1	1	0	0	0	0	0	0	0	0	0
MSRB2_HUMAN	Methionine-R-sulfoxide reductase B2, mitochondrial OS=Homo sapiens GN=MSRB2 PE=2 SV=2	2.267	0.6484	0.06032	2	2	2	1	1	1	3	3	3	3	2	2	1	1	1	1	1	1	0	0	0	1	1	1	2	2	2	1	1	1	1	1	1	1	1	1	2	1	1	1	1	1	1	1	1
TPD54_HUMAN	Tumor protein D54 OS=Homo sapiens GN=TPD52L2 PE=1 SV=2	2.35	0.7209	0.060994	3	3	3	0	0	0	0	0	0	0	0	0	0	0	0	1	1	1	0	0	0	0	0	0	1	1	1	0	0	0	0	0	0	0	0	0	1	1	1	0	0	0	1	1	1
GG6L6_HUMAN	Putative golgin subfamily A member 6-like protein 6 OS=Homo sapiens GN=GOLGA6L6 PE=5 SV=3	1.521	0.1981	0.619861	0	0	0	0	0	0	0	0	0	1	1	0	0	0	0	0	0	0	0	0	0	1	1	0	0	0	0	1	1	0	0	0	0	0	0	0	0	0	0	0	0	0	0	0	0
IPYR2_HUMAN	Inorganic pyrophosphatase 2, mitochondrial OS=Homo sapiens GN=PPA2 PE=1 SV=2	1.963	0.5191	0.023146	2	2	1	0	0	0	0	0	0	0	0	0	0	0	0	1	1	1	0	0	0	0	0	0	0	0	0	0	0	0	0	0	0	0	0	0	0	0	0	0	0	0	0	0	0
YRDC_HUMAN	YrdC domain-containing protein, mitochondrial OS=Homo sapiens GN=YRDC PE=1 SV=1	1.295	0.2286	2.01052	0	0	0	0	0	0	0	0	0	0	0	0	0	0	0	1	1	1	0	0	0	0	0	0	0	0	0	0	0	0	0	0	0	0	0	0	0	0	0	0	0	0	0	0	0
K1C13_HUMAN	Keratin, type I cytoskeletal 13 OS=Homo sapiens GN=KRT13 PE=1 SV=4	3.117	0.7152	0.001148	13	6	1	12	5	0	12	6	0	24	8	0	26	14	6	15	7	0	54	12	5	40	17	7	16	5	0	19	4	0	30	14	7	17	6	0	14	5	0	25	12	6	15	3	0
ARL11_HUMAN	ADP-ribosylation factor-like protein 11 OS=Homo sapiens GN=ARL11 PE=1 SV=1	1.452	0.1739	1.16107	1	1	1	0	0	0	0	0	0	1	1	1	0	0	0	0	0	0	0	0	0	0	0	0	0	0	0	0	0	0	0	0	0	0	0	0	0	0	0	0	0	0	0	0	0
UGDH_HUMAN	UDP-glucose 6-dehydrogenase OS=Homo sapiens GN=UGDH PE=1 SV=1	2.226	0.7683	0.0041	2	2	2	0	0	0	1	1	1	2	2	2	0	0	0	2	2	2	0	0	0	0	0	0	1	1	1	1	1	1	0	0	0	1	1	1	1	1	1	0	0	0	0	0	0
2AAB_HUMAN	Serine/threonine-protein phosphatase 2A 65 kDa regulatory subunit A beta isoform OS=Homo sapiens GN=PPP2R1B PE=1 SV=3	1.754	0.2495	0.21911	1	1	0	0	0	0	0	0	0	0	0	0	1	1	0	1	1	0	0	0	0	0	0	0	0	0	0	0	0	0	0	0	0	0	0	0	1	1	0	0	0	0	1	1	0
PLRG1_HUMAN	Pleiotropic regulator 1 OS=Homo sapiens GN=PLRG1 PE=1 SV=1	1.76	0.4972	0.15544	2	2	2	0	0	0	0	0	0	0	0	0	0	0	0	1	1	1	1	1	1	0	0	0	2	2	2	0	0	0	0	0	0	1	1	1	0	0	0	0	0	0	0	0	0
1A31_HUMAN	HLA class I histocompatibility antigen, A-31 alpha chain OS=Homo sapiens GN=HLA-A PE=2 SV=2	2.621	0.7085	0.054574	1	1	0	1	1	0	2	2	0	0	0	0	0	0	0	1	1	0	0	0	0	0	0	0	0	0	0	0	0	0	0	0	0	0	0	0	1	1	0	1	1	0	0	0	0
DLDH_HUMAN	Dihydrolipoyl dehydrogenase, mitochondrial OS=Homo sapiens GN=DLD PE=1 SV=2	2.723	0.6607	0.000356	4	4	4	3	3	3	4	4	4	3	3	3	3	3	3	4	4	4	3	3	3	4	4	4	4	4	4	3	3	3	2	2	2	4	4	4	3	3	3	2	2	2	5	5	5
FSCN1_HUMAN	Fascin OS=Homo sapiens GN=FSCN1 PE=1 SV=3	3.039	0.717	0.005684	9	9	9	6	5	5	9	7	7	7	7	7	5	5	5	10	8	8	5	5	5	6	6	6	9	7	7	7	7	7	5	5	5	8	7	7	9	7	7	5	5	5	6	6	6
1A69_HUMAN	HLA class I histocompatibility antigen, A-69 alpha chain OS=Homo sapiens GN=HLA-A PE=1 SV=2	2.621	0.7085	0.054574	1	1	0	1	1	0	2	2	0	0	0	0	0	0	0	2	2	0	0	0	0	0	0	0	0	0	0	0	0	0	0	0	0	0	0	0	1	1	0	1	1	0	0	0	0
UBE2T_HUMAN	Ubiquitin-conjugating enzyme E2 T OS=Homo sapiens GN=UBE2T PE=1 SV=1	1.906	0.6233	0.445309	1	1	1	0	0	0	0	0	0	1	1	1	0	0	0	1	1	1	0	0	0	0	0	0	0	0	0	0	0	0	0	0	0	0	0	0	1	1	1	0	0	0	0	0	0
MATN4_HUMAN	Matrilin-4 OS=Homo sapiens GN=MATN4 PE=1 SV=3	1.215	0.2412	0.049834	0	0	0	0	0	0	0	0	0	1	1	1	0	0	0	1	1	1	0	0	0	0	0	0	0	0	0	0	0	0	0	0	0	0	0	0	0	0	0	0	0	0	0	0	0
IQGA1_HUMAN	Ras GTPase-activating-like protein IQGAP1 OS=Homo sapiens GN=IQGAP1 PE=1 SV=1	3.158	0.7095	0.001505	18	18	18	2	2	2	10	10	10	13	13	12	3	3	3	14	14	13	3	3	3	6	6	5	12	12	11	6	6	6	1	1	1	9	9	8	8	8	7	3	3	2	6	6	5
UBP5_HUMAN	Ubiquitin carboxyl-terminal hydrolase 5 OS=Homo sapiens GN=USP5 PE=1 SV=2	2.901	0.7548	0.022384	7	7	7	3	3	3	6	6	6	4	4	4	1	1	1	5	5	5	1	1	1	1	1	1	4	4	4	2	2	2	1	1	1	3	3	3	5	5	5	1	1	1	3	3	3
SMD3_HUMAN	Small nuclear ribonucleoprotein Sm D3 OS=Homo sapiens GN=SNRPD3 PE=1 SV=1	2.726	0.4336	0.040357	2	2	2	0	0	0	0	0	0	1	1	1	0	0	0	2	2	2	0	0	0	0	0	0	1	1	1	0	0	0	0	0	0	1	1	1	0	0	0	0	0	0	1	1	1
METK1_HUMAN	S-adenosylmethionine synthase isoform type-1 OS=Homo sapiens GN=MAT1A PE=1 SV=2	2.183	0.4347	0.436621	1	1	0	0	0	0	1	1	0	0	0	0	0	0	0	0	0	0	0	0	0	0	0	0	1	1	0	0	0	0	0	0	0	1	1	0	0	0	0	0	0	0	1	1	0
CSN2_HUMAN	COP9 signalosome complex subunit 2 OS=Homo sapiens GN=COPS2 PE=1 SV=1	1.173	0.3564	0.622744	0	0	0	0	0	0	0	0	0	0	0	0	0	0	0	0	0	0	0	0	0	0	0	0	1	1	1	0	0	0	0	0	0	0	0	0	0	0	0	0	0	0	0	0	0
GP108_HUMAN	Protein GPR108 OS=Homo sapiens GN=GPR108 PE=2 SV=3	1.085	0.247	1.26299	0	0	0	0	0	0	0	0	0	1	1	1	0	0	0	0	0	0	0	0	0	0	0	0	0	0	0	0	0	0	0	0	0	0	0	0	0	0	0	0	0	0	0	0	0
RU1C_HUMAN	U1 small nuclear ribonucleoprotein C OS=Homo sapiens GN=SNRPC PE=1 SV=1	2.091	0.6538	0.117059	2	2	2	1	1	1	2	2	2	1	1	1	1	1	1	2	2	2	1	1	1	1	1	1	1	1	1	1	1	1	1	1	1	1	1	1	1	1	1	1	1	1	1	1	1
ACTH_HUMAN	Actin, gamma-enteric smooth muscle OS=Homo sapiens GN=ACTG2 PE=1 SV=1	5.073	0.8069	0.000375	48	16	0	52	15	0	49	17	0	64	17	0	45	16	0	60	16	0	73	10	0	46	13	0	52	16	0	51	14	0	35	15	0	40	16	0	59	16	0	43	14	0	41	11	0
ACTA_HUMAN	Actin, aortic smooth muscle OS=Homo sapiens GN=ACTA2 PE=1 SV=1	5.073	0.8069	0.000375	48	16	0	52	15	0	49	17	0	64	17	0	45	16	0	60	16	0	73	10	0	46	13	0	52	16	0	51	14	0	35	15	0	40	16	0	59	16	0	43	14	0	41	11	0
ACTC_HUMAN	Actin, alpha cardiac muscle 1 OS=Homo sapiens GN=ACTC1 PE=1 SV=1	5.073	0.8069	0.000375	48	16	0	52	15	0	50	18	0	64	17	0	45	16	0	60	16	0	73	10	0	46	13	0	52	16	0	51	14	0	35	15	0	40	16	0	59	16	0	43	14	0	41	11	0
ACTS_HUMAN	Actin, alpha skeletal muscle OS=Homo sapiens GN=ACTA1 PE=1 SV=1	5.073	0.8069	0.000375	48	16	0	52	15	0	50	18	0	64	17	0	45	16	0	60	16	0	73	10	0	46	13	0	52	16	0	51	14	0	35	15	0	40	16	0	59	16	0	43	14	0	41	11	0
ELOB_HUMAN	Transcription elongation factor B polypeptide 2 OS=Homo sapiens GN=TCEB2 PE=1 SV=1	1.957	0.5292	0.004886	3	3	3	0	0	0	2	2	2	1	1	1	0	0	0	3	3	3	0	0	0	0	0	0	1	1	1	1	1	1	0	0	0	0	0	0	2	2	2	0	0	0	1	1	1
FA98B_HUMAN	Protein FAM98B OS=Homo sapiens GN=FAM98B PE=1 SV=1	1.36	0.4559	1.1593	0	0	0	0	0	0	0	0	0	0	0	0	0	0	0	0	0	0	0	0	0	0	0	0	1	1	1	0	0	0	0	0	0	0	0	0	0	0	0	0	0	0	0	0	0
LSM12_HUMAN	Protein LSM12 homolog OS=Homo sapiens GN=LSM12 PE=1 SV=2	2.256	0.5563	0.156338	1	1	1	0	0	0	1	1	1	0	0	0	0	0	0	0	0	0	0	0	0	0	0	0	0	0	0	0	0	0	1	1	1	1	1	1	0	0	0	0	0	0	1	1	1
LA_HUMAN	Lupus La protein OS=Homo sapiens GN=SSB PE=1 SV=2	3.618	0.6814	0.000239	5	5	5	1	1	1	2	2	2	6	6	6	5	5	5	6	6	6	2	2	2	6	6	6	6	6	6	7	6	6	3	3	3	4	4	4	8	8	8	5	5	5	6	5	5
FKB9L_HUMAN	Putative FK506-binding protein 9-like protein OS=Homo sapiens GN=FKBP9L PE=5 SV=1	1.467	0.3915	0.887008	1	1	0	0	0	0	1	1	0	0	0	0	1	1	0	0	0	0	0	0	0	1	1	0	0	0	0	0	0	0	0	0	0	0	0	0	0	0	0	0	0	0	0	0	0
RNZ2_HUMAN	Zinc phosphodiesterase ELAC protein 2 OS=Homo sapiens GN=ELAC2 PE=1 SV=2	1.824	0.5992	0.083493	0	0	0	0	0	0	1	1	1	0	0	0	1	1	1	0	0	0	0	0	0	1	1	1	1	1	1	0	0	0	0	0	0	0	0	0	1	1	1	0	0	0	0	0	0
ELAV2_HUMAN	ELAV-like protein 2 OS=Homo sapiens GN=ELAVL2 PE=1 SV=2	1.739	0.4784	0.540757	0	0	0	0	0	0	0	0	0	1	1	0	0	0	0	0	0	0	0	0	0	0	0	0	0	0	0	0	0	0	0	0	0	0	0	0	1	1	0	0	0	0	0	0	0
CLIP1_HUMAN	CAP-Gly domain-containing linker protein 1 OS=Homo sapiens GN=CLIP1 PE=1 SV=2	1.801	0.5658	0.161906	0	0	0	0	0	0	1	1	1	1	1	1	1	1	1	3	3	3	0	0	0	0	0	0	3	3	2	0	0	0	0	0	0	0	0	0	1	1	1	0	0	0	0	0	0
SPTA1_HUMAN	Spectrin alpha chain, erythrocytic 1 OS=Homo sapiens GN=SPTA1 PE=1 SV=5	1.259	0.2923	0.566124	0	0	0	0	0	0	0	0	0	0	0	0	0	0	0	0	0	0	0	0	0	0	0	0	0	0	0	0	0	0	0	0	0	0	0	0	1	1	0	0	0	0	0	0	0
BIRC6_HUMAN	Baculoviral IAP repeat-containing protein 6 OS=Homo sapiens GN=BIRC6 PE=1 SV=2	1.696	0.4281	1.1256	0	0	0	1	1	1	0	0	0	0	0	0	0	0	0	0	0	0	0	0	0	0	0	0	0	0	0	0	0	0	0	0	0	0	0	0	0	0	0	0	0	0	0	0	0
AIMP2_HUMAN	Aminoacyl tRNA synthase complex-interacting multifunctional protein 2 OS=Homo sapiens GN=AIMP2 PE=1 SV=2	2.696	0.6454	0.141664	6	6	6	2	2	2	6	6	6	1	1	1	0	0	0	1	1	1	2	2	2	1	1	1	1	1	1	2	2	2	1	1	1	1	1	1	1	1	1	0	0	0	2	2	2
FLOT2_HUMAN	Flotillin-2 OS=Homo sapiens GN=FLOT2 PE=1 SV=2	1.653	0.3665	0.29036	2	2	2	0	0	0	0	0	0	0	0	0	0	0	0	0	0	0	0	0	0	0	0	0	0	0	0	0	0	0	0	0	0	1	1	1	0	0	0	0	0	0	0	0	0
VP26B_HUMAN	Vacuolar protein sorting-associated protein 26B OS=Homo sapiens GN=VPS26B PE=1 SV=2	1.666	0.2996	1.06215	1	1	0	0	0	0	0	0	0	1	1	0	0	0	0	0	0	0	0	0	0	0	0	0	0	0	0	0	0	0	0	0	0	0	0	0	1	1	0	0	0	0	0	0	0
RS25_HUMAN	40S ribosomal protein S25 OS=Homo sapiens GN=RPS25 PE=1 SV=1	2.379	0.6446	0.021611	1	1	1	3	3	3	3	3	3	3	3	3	0	0	0	4	4	4	0	0	0	0	0	0	4	3	3	1	1	1	0	0	0	0	0	0	1	1	1	0	0	0	0	0	0
IF4B_HUMAN	Eukaryotic translation initiation factor 4B OS=Homo sapiens GN=EIF4B PE=1 SV=2	3.752	0.7916	0.008939	7	7	7	4	4	4	11	11	11	8	8	8	9	9	9	14	13	13	6	6	6	7	7	7	10	10	10	8	8	8	3	3	3	10	10	10	11	11	11	6	6	6	5	5	5
FOLR1_HUMAN	Folate receptor alpha OS=Homo sapiens GN=FOLR1 PE=1 SV=3	1.509	0.3989	0.380553	0	0	0	1	1	1	1	1	1	1	1	1	2	2	2	1	1	1	0	0	0	2	2	2	2	2	2	1	1	1	2	2	2	1	1	1	3	2	2	0	0	0	1	1	1
ITA6_HUMAN	Integrin alpha-6 OS=Homo sapiens GN=ITGA6 PE=1 SV=4	0.993	0.2578	0.071941	1	1	1	0	0	0	0	0	0	0	0	0	0	0	0	0	0	0	0	0	0	0	0	0	0	0	0	0	0	0	0	0	0	0	0	0	0	0	0	0	0	0	0	0	0
AL7A1_HUMAN	Alpha-aminoadipic semialdehyde dehydrogenase OS=Homo sapiens GN=ALDH7A1 PE=1 SV=5	2.627	0.6324	0.001293	6	6	6	0	0	0	7	7	7	3	3	3	0	0	0	4	4	4	0	0	0	1	1	1	5	5	5	0	0	0	0	0	0	4	4	4	6	6	6	1	1	1	5	5	5
NUP88_HUMAN	Nuclear pore complex protein Nup88 OS=Homo sapiens GN=NUP88 PE=1 SV=2	1.89	0.6339	0.006994	4	4	4	1	1	1	2	2	2	2	2	2	0	0	0	2	2	2	0	0	0	0	0	0	1	1	1	0	0	0	0	0	0	1	1	1	1	1	1	0	0	0	0	0	0
CPNE8_HUMAN	Copine-8 OS=Homo sapiens GN=CPNE8 PE=1 SV=2	1.819	0.4959	0.505419	1	1	0	0	0	0	0	0	0	0	0	0	0	0	0	0	0	0	0	0	0	0	0	0	0	0	0	0	0	0	0	0	0	0	0	0	0	0	0	0	0	0	0	0	0
K1C18_HUMAN	Keratin, type I cytoskeletal 18 OS=Homo sapiens GN=KRT18 PE=1 SV=2	4.948	0.7718	0.000365	41	26	22	35	16	13	35	25	21	46	24	20	35	18	14	37	24	20	39	12	8	31	12	9	67	29	25	29	17	13	25	12	8	40	24	20	38	19	15	26	10	6	36	15	12
OSBP1_HUMAN	Oxysterol-binding protein 1 OS=Homo sapiens GN=OSBP PE=1 SV=1	1.802	0.5306	0.190686	2	2	2	0	0	0	0	0	0	0	0	0	0	0	0	1	1	1	0	0	0	0	0	0	0	0	0	0	0	0	0	0	0	0	0	0	0	0	0	0	0	0	0	0	0
LIS1_HUMAN	Platelet-activating factor acetylhydrolase IB subunit alpha OS=Homo sapiens GN=PAFAH1B1 PE=1 SV=2	3.414	0.7525	0.071719	6	6	6	0	0	0	3	3	3	4	4	4	0	0	0	4	4	4	1	1	1	1	1	1	3	3	3	0	0	0	0	0	0	3	3	3	3	3	3	0	0	0	2	2	2
R13AX_HUMAN	Putative 60S ribosomal protein L13a-like MGC87657 OS=Homo sapiens PE=5 SV=1	2.106	0.6771	0.056377	0	0	0	0	0	0	0	0	0	1	1	0	0	0	0	1	1	0	0	0	0	0	0	0	1	1	0	1	1	0	0	0	0	0	0	0	2	2	0	0	0	0	0	0	0
PCBP2_HUMAN	Poly(rC)-binding protein 2 OS=Homo sapiens GN=PCBP2 PE=1 SV=1	3.081	0.7656	0.002054	7	7	2	5	5	1	6	6	1	6	6	1	3	3	1	4	4	1	3	3	1	2	2	0	3	3	0	5	5	1	3	2	0	2	2	0	7	6	1	1	1	0	2	2	1
COX2_HUMAN	Cytochrome c oxidase subunit 2 OS=Homo sapiens GN=MT-CO2 PE=1 SV=1	1.928	0.6105	0.003271	3	3	3	2	2	2	3	3	3	1	1	1	1	1	1	2	2	2	1	1	1	1	1	1	1	1	1	1	1	1	0	0	0	1	1	1	2	2	2	1	1	1	1	1	1
LYST_HUMAN	Lysosomal-trafficking regulator OS=Homo sapiens GN=LYST PE=1 SV=3	1.814	0.2762	0.157156	1	1	1	0	0	0	0	0	0	1	1	1	0	0	0	1	1	1	0	0	0	0	0	0	0	0	0	0	0	0	1	1	1	0	0	0	0	0	0	0	0	0	0	0	0
PAIRB_HUMAN	Plasminogen activator inhibitor 1 RNA-binding protein OS=Homo sapiens GN=SERBP1 PE=1 SV=2	4.25	0.7869	0.003257	7	6	6	5	5	5	11	10	10	10	9	9	7	6	6	12	10	10	4	4	4	4	4	4	9	8	8	6	5	5	6	5	5	7	6	6	9	8	8	5	4	4	5	4	4
PSAL_HUMAN	Puromycin-sensitive aminopeptidase-like protein OS=Homo sapiens GN=NPEPPSL1 PE=2 SV=3	2.991	0.7558	0.098891	3	3	0	0	0	0	0	0	0	1	1	0	0	0	0	1	1	0	0	0	0	0	0	0	3	3	0	0	0	0	0	0	0	1	1	0	2	2	0	0	0	0	0	0	0
RGPD5_HUMAN	RANBP2-like and GRIP domain-containing protein 5/6 OS=Homo sapiens GN=RGPD5 PE=1 SV=3	1.794	0.6805	0.163427	2	2	0	0	0	0	2	2	0	2	2	0	0	0	0	0	0	0	0	0	0	0	0	0	2	1	0	0	0	0	0	0	0	1	1	0	1	1	0	0	0	0	0	0	0
TIM50_HUMAN	Mitochondrial import inner membrane translocase subunit TIM50 OS=Homo sapiens GN=TIMM50 PE=1 SV=2	2.623	0.691	0.010635	4	4	4	3	2	2	3	3	3	1	1	1	2	2	2	2	2	2	0	0	0	2	2	2	2	2	2	2	2	2	1	1	1	2	2	2	0	0	0	1	1	1	1	1	1
MBOA7_HUMAN	Lysophospholipid acyltransferase 7 OS=Homo sapiens GN=MBOAT7 PE=1 SV=2	1.187	0.3858	0.080542	0	0	0	0	0	0	0	0	0	0	0	0	0	0	0	1	1	1	0	0	0	0	0	0	0	0	0	0	0	0	0	0	0	0	0	0	0	0	0	0	0	0	0	0	0
PHAX_HUMAN	Phosphorylated adapter RNA export protein OS=Homo sapiens GN=PHAX PE=1 SV=1	1.925	0.4883	0.803414	0	0	0	0	0	0	0	0	0	1	1	1	0	0	0	1	1	1	0	0	0	0	0	0	0	0	0	0	0	0	0	0	0	0	0	0	0	0	0	0	0	0	0	0	0
AIFM2_HUMAN	Apoptosis-inducing factor 2 OS=Homo sapiens GN=AIFM2 PE=1 SV=1	1.882	0.449	0.194202	1	1	1	0	0	0	0	0	0	0	0	0	0	0	0	1	1	1	0	0	0	0	0	0	0	0	0	0	0	0	0	0	0	0	0	0	0	0	0	0	0	0	0	0	0
1A11_HUMAN	HLA class I histocompatibility antigen, A-11 alpha chain OS=Homo sapiens GN=HLA-A PE=1 SV=1	2.621	0.7085	0.054574	1	1	0	1	1	0	2	2	0	0	0	0	0	0	0	1	1	0	0	0	0	0	0	0	0	0	0	0	0	0	0	0	0	0	0	0	1	1	0	1	1	0	0	0	0
IDHC_HUMAN	Isocitrate dehydrogenase [NADP] cytoplasmic OS=Homo sapiens GN=IDH1 PE=1 SV=2	3.312	0.762	0.000614	8	7	7	3	3	3	7	6	5	9	8	8	2	2	2	8	8	7	3	3	3	7	6	6	5	4	4	4	3	3	2	2	2	5	5	5	8	6	6	2	2	2	5	4	4
IDHP_HUMAN	Isocitrate dehydrogenase [NADP], mitochondrial OS=Homo sapiens GN=IDH2 PE=1 SV=2	1.627	0.4361	0.039547	0	0	0	0	0	0	1	1	0	0	0	0	0	0	0	1	1	0	0	0	0	0	0	0	0	0	0	0	0	0	0	0	0	0	0	0	0	0	0	0	0	0	0	0	0
PPIB_HUMAN	Peptidyl-prolyl cis-trans isomerase B OS=Homo sapiens GN=PPIB PE=1 SV=2	2.585	0.7924	0.045709	2	2	2	0	0	0	3	3	3	2	2	2	0	0	0	3	3	3	0	0	0	0	0	0	3	3	3	0	0	0	0	0	0	1	1	1	1	1	1	0	0	0	0	0	0
TAGL_HUMAN	Transgelin OS=Homo sapiens GN=TAGLN PE=1 SV=4	1.233	0.4562	0.542308	1	1	1	0	0	0	0	0	0	0	0	0	0	0	0	0	0	0	0	0	0	0	0	0	0	0	0	0	0	0	0	0	0	0	0	0	1	1	1	0	0	0	0	0	0
AR6P1_HUMAN	ADP-ribosylation factor-like protein 6-interacting protein 1 OS=Homo sapiens GN=ARL6IP1 PE=1 SV=2	1.888	0.4677	0.127616	1	1	1	0	0	0	0	0	0	0	0	0	0	0	0	0	0	0	0	0	0	0	0	0	0	0	0	0	0	0	0	0	0	0	0	0	0	0	0	0	0	0	0	0	0
GBB1_HUMAN	Guanine nucleotide-binding protein G(I)/G(S)/G(T) subunit beta-1 OS=Homo sapiens GN=GNB1 PE=1 SV=3	2.342	0.6025	0.011184	2	2	0	0	0	0	3	3	0	3	3	0	1	1	0	1	1	0	0	0	0	1	1	0	2	2	0	0	0	0	1	1	0	2	2	0	1	1	0	1	1	0	2	2	0
MSH6_HUMAN	DNA mismatch repair protein Msh6 OS=Homo sapiens GN=MSH6 PE=1 SV=2	2.419	0.7954	0.004394	6	6	6	2	2	2	4	4	4	2	2	2	0	0	0	3	3	3	1	1	1	1	1	1	3	3	3	2	2	2	1	1	1	2	2	2	2	2	2	0	0	0	1	1	1
HMGN5_HUMAN	High mobility group nucleosome-binding domain-containing protein 5 OS=Homo sapiens GN=HMGN5 PE=1 SV=1	1.646	0.3698	0.096287	0	0	0	0	0	0	0	0	0	0	0	0	0	0	0	0	0	0	0	0	0	0	0	0	2	2	2	0	0	0	0	0	0	0	0	0	0	0	0	0	0	0	1	1	1
SPA12_HUMAN	Serpin A12 OS=Homo sapiens GN=SERPINA12 PE=2 SV=1	1.481	0.3624	0.017348	0	0	0	0	0	0	0	0	0	0	0	0	0	0	0	0	0	0	0	0	0	0	0	0	0	0	0	0	0	0	0	0	0	0	0	0	0	0	0	0	0	0	0	0	0
NRDC_HUMAN	Nardilysin OS=Homo sapiens GN=NRD1 PE=1 SV=2	2.874	0.6878	0.045593	4	4	4	2	2	2	5	5	5	1	1	1	0	0	0	1	1	1	0	0	0	0	0	0	2	2	2	0	0	0	0	0	0	0	0	0	0	0	0	0	0	0	0	0	0
RL10A_HUMAN	60S ribosomal protein L10a OS=Homo sapiens GN=RPL10A PE=1 SV=2	2.633	0.6939	0.037494	3	3	3	3	3	3	2	2	2	3	2	2	0	0	0	3	3	3	0	0	0	0	0	0	3	3	3	4	2	2	0	0	0	1	1	1	3	2	2	0	0	0	2	2	2
NOMO2_HUMAN	Nodal modulator 2 OS=Homo sapiens GN=NOMO2 PE=1 SV=1	2.06	0.5287	0.237306	2	2	0	0	0	0	0	0	0	1	1	0	0	0	0	2	2	0	0	0	0	0	0	0	1	1	0	0	0	0	0	0	0	0	0	0	0	0	0	0	0	0	0	0	0
MK01_HUMAN	Mitogen-activated protein kinase 1 OS=Homo sapiens GN=MAPK1 PE=1 SV=3	1.614	0.4709	0.502833	0	0	0	0	0	0	0	0	0	0	0	0	0	0	0	0	0	0	0	0	0	0	0	0	0	0	0	0	0	0	0	0	0	0	0	0	1	1	1	0	0	0	0	0	0
NDUS1_HUMAN	NADH-ubiquinone oxidoreductase 75 kDa subunit, mitochondrial OS=Homo sapiens GN=NDUFS1 PE=1 SV=3	1.473	0.4073	0.480711	0	0	0	0	0	0	0	0	0	0	0	0	0	0	0	1	1	1	0	0	0	0	0	0	0	0	0	0	0	0	0	0	0	0	0	0	0	0	0	0	0	0	0	0	0
DAZP1_HUMAN	DAZ-associated protein 1 OS=Homo sapiens GN=DAZAP1 PE=1 SV=1	1.897	0.6979	0.065653	0	0	0	0	0	0	0	0	0	1	1	1	0	0	0	0	0	0	0	0	0	0	0	0	0	0	0	0	0	0	0	0	0	0	0	0	0	0	0	0	0	0	0	0	0
DREB_HUMAN	Drebrin OS=Homo sapiens GN=DBN1 PE=1 SV=4	2.45	0.4771	0.058381	0	0	0	0	0	0	0	0	0	0	0	0	0	0	0	0	0	0	0	0	0	0	0	0	2	2	2	0	0	0	0	0	0	0	0	0	0	0	0	0	0	0	0	0	0
VPS29_HUMAN	Vacuolar protein sorting-associated protein 29 OS=Homo sapiens GN=VPS29 PE=1 SV=1	2.326	0.4755	1.16236	2	2	2	0	0	0	0	0	0	0	0	0	0	0	0	0	0	0	0	0	0	0	0	0	0	0	0	0	0	0	0	0	0	0	0	0	0	0	0	0	0	0	0	0	0
KDM5D_HUMAN	Lysine-specific demethylase 5D OS=Homo sapiens GN=KDM5D PE=1 SV=2	1.409	0.378	0.018427	1	1	0	0	0	0	0	0	0	0	0	0	0	0	0	0	0	0	0	0	0	0	0	0	0	0	0	0	0	0	0	0	0	0	0	0	1	1	0	0	0	0	0	0	0
ARPC2_HUMAN	Actin-related protein 2/3 complex subunit 2 OS=Homo sapiens GN=ARPC2 PE=1 SV=1	2.064	0.5695	0.010727	6	6	6	0	0	0	3	3	3	5	5	5	0	0	0	2	2	2	0	0	0	2	2	2	1	1	1	1	1	1	0	0	0	2	2	2	3	3	3	0	0	0	2	2	2
TF3C4_HUMAN	General transcription factor 3C polypeptide 4 OS=Homo sapiens GN=GTF3C4 PE=1 SV=2	1.354	0.3685	0.093264	1	1	1	0	0	0	0	0	0	1	1	1	0	0	0	0	0	0	0	0	0	0	0	0	0	0	0	0	0	0	0	0	0	0	0	0	1	1	1	0	0	0	0	0	0
ZO2_HUMAN	Tight junction protein ZO-2 OS=Homo sapiens GN=TJP2 PE=1 SV=2	1.588	0.6461	1.15262	0	0	0	1	1	1	0	0	0	0	0	0	0	0	0	1	1	1	0	0	0	0	0	0	0	0	0	0	0	0	0	0	0	0	0	0	0	0	0	0	0	0	0	0	0
2ABA_HUMAN	Serine/threonine-protein phosphatase 2A 55 kDa regulatory subunit B alpha isoform OS=Homo sapiens GN=PPP2R2A PE=1 SV=1	2.447	0.7082	0.002716	4	4	3	1	1	0	3	3	2	4	4	2	0	0	0	3	3	2	0	0	0	0	0	0	3	3	2	1	1	1	1	1	0	2	2	1	3	3	2	1	1	0	0	0	0
ADRM1_HUMAN	Proteasomal ubiquitin receptor ADRM1 OS=Homo sapiens GN=ADRM1 PE=1 SV=2	2.742	0.6995	0.235611	4	4	4	1	1	1	2	2	2	2	2	2	1	1	1	1	1	1	1	1	1	1	1	1	0	0	0	1	1	1	1	1	1	1	1	1	2	2	2	0	0	0	1	1	1
ODPX_HUMAN	Pyruvate dehydrogenase protein X component, mitochondrial OS=Homo sapiens GN=PDHX PE=1 SV=3	1.666	0.3733	0.392028	1	1	1	0	0	0	0	0	0	0	0	0	0	0	0	0	0	0	0	0	0	0	0	0	0	0	0	0	0	0	0	0	0	0	0	0	0	0	0	0	0	0	0	0	0
TOM20_HUMAN	Mitochondrial import receptor subunit TOM20 homolog OS=Homo sapiens GN=TOMM20 PE=1 SV=1	1.456	0.5707	0.035343	1	1	1	0	0	0	0	0	0	0	0	0	0	0	0	0	0	0	0	0	0	0	0	0	0	0	0	0	0	0	0	0	0	0	0	0	0	0	0	0	0	0	0	0	0
KRT82_HUMAN	Keratin, type II cuticular Hb2 OS=Homo sapiens GN=KRT82 PE=1 SV=3	2.446	0.5593	0.047947	0	0	0	0	0	0	1	1	0	3	3	2	0	0	0	0	0	0	0	0	0	0	0	0	0	0	0	0	0	0	0	0	0	0	0	0	0	0	0	0	0	0	0	0	0
ACL6A_HUMAN	Actin-like protein 6A OS=Homo sapiens GN=ACTL6A PE=1 SV=1	2.154	0.5781	0.005855	1	1	1	0	0	0	2	2	2	1	1	1	0	0	0	2	2	2	0	0	0	1	1	1	1	1	1	1	1	1	1	1	1	2	2	2	2	2	2	1	1	1	0	0	0
SYHC_HUMAN	Histidine--tRNA ligase, cytoplasmic OS=Homo sapiens GN=HARS PE=1 SV=2	2.641	0.713	0.054792	4	4	3	0	0	0	3	3	2	3	3	2	0	0	0	2	2	2	0	0	0	0	0	0	0	0	0	0	0	0	0	0	0	0	0	0	2	2	1	0	0	0	0	0	0
PSME3_HUMAN	Proteasome activator complex subunit 3 OS=Homo sapiens GN=PSME3 PE=1 SV=1	2.638	0.5792	0.025352	1	1	1	1	1	1	0	0	0	1	1	1	0	0	0	0	0	0	0	0	0	0	0	0	0	0	0	0	0	0	0	0	0	0	0	0	0	0	0	0	0	0	0	0	0
IMDH1_HUMAN	Inosine-5'-monophosphate dehydrogenase 1 OS=Homo sapiens GN=IMPDH1 PE=1 SV=2	2.084	0.4976	0.001979	2	2	2	1	1	0	1	1	1	0	0	0	1	1	0	1	1	1	0	0	0	0	0	0	0	0	0	1	1	0	1	1	0	1	1	1	1	1	1	2	2	1	2	2	1
41_HUMAN	Protein 4.1 OS=Homo sapiens GN=EPB41 PE=1 SV=4	1.021	0.2997	1.7666	1	1	1	0	0	0	0	0	0	0	0	0	0	0	0	0	0	0	0	0	0	0	0	0	0	0	0	0	0	0	0	0	0	0	0	0	0	0	0	0	0	0	0	0	0
BRX1_HUMAN	Ribosome biogenesis protein BRX1 homolog OS=Homo sapiens GN=BRIX1 PE=1 SV=2	1.642	0.578	0.09727	0	0	0	0	0	0	0	0	0	1	1	1	0	0	0	0	0	0	0	0	0	0	0	0	1	1	1	0	0	0	0	0	0	0	0	0	0	0	0	0	0	0	0	0	0
STAM1_HUMAN	Signal transducing adapter molecule 1 OS=Homo sapiens GN=STAM PE=1 SV=3	1.212	0.3597	1.18413	1	1	0	0	0	0	0	0	0	0	0	0	0	0	0	0	0	0	0	0	0	0	0	0	0	0	0	0	0	0	0	0	0	0	0	0	0	0	0	0	0	0	0	0	0
MAT2B_HUMAN	Methionine adenosyltransferase 2 subunit beta OS=Homo sapiens GN=MAT2B PE=1 SV=1	2.026	0.6546	0.315016	1	1	1	0	0	0	1	1	1	0	0	0	0	0	0	1	1	1	0	0	0	0	0	0	0	0	0	0	0	0	0	0	0	0	0	0	1	1	1	0	0	0	0	0	0
UCRI_HUMAN	Cytochrome b-c1 complex subunit Rieske, mitochondrial OS=Homo sapiens GN=UQCRFS1 PE=1 SV=2	1.899	0.5577	0.175195	1	1	0	0	0	0	1	1	0	2	2	0	0	0	0	4	4	0	0	0	0	0	0	0	1	1	0	1	1	0	0	0	0	0	0	0	1	1	0	1	1	0	1	1	0
AHNK_HUMAN	Neuroblast differentiation-associated protein AHNAK OS=Homo sapiens GN=AHNAK PE=1 SV=2	4.058	0.6987	0.001389	28	27	27	17	16	16	34	32	32	23	22	22	9	8	8	23	21	21	6	4	4	15	13	13	22	21	21	11	9	9	5	4	4	19	17	17	22	20	20	5	4	4	16	15	15
NOA1_HUMAN	Nitric oxide-associated protein 1 OS=Homo sapiens GN=NOA1 PE=1 SV=2	1.099	0.1865	0.847802	0	0	0	0	0	0	0	0	0	0	0	0	0	0	0	0	0	0	1	1	1	0	0	0	0	0	0	0	0	0	0	0	0	0	0	0	1	1	1	0	0	0	0	0	0
ARPC4_HUMAN	Actin-related protein 2/3 complex subunit 4 OS=Homo sapiens GN=ARPC4 PE=1 SV=3	2.242	0.5633	0.200466	4	4	4	0	0	0	1	1	1	0	0	0	0	0	0	0	0	0	0	0	0	0	0	0	0	0	0	0	0	0	0	0	0	0	0	0	0	0	0	0	0	0	0	0	0
MPCP_HUMAN	Phosphate carrier protein, mitochondrial OS=Homo sapiens GN=SLC25A3 PE=1 SV=2	2.415	0.6152	0.015143	4	4	4	2	2	2	2	2	2	6	5	5	1	1	1	4	3	3	1	1	1	3	3	3	3	3	3	4	3	3	0	0	0	3	3	3	5	5	5	2	2	2	3	3	3
HSP72_HUMAN	Heat shock-related 70 kDa protein 2 OS=Homo sapiens GN=HSPA2 PE=1 SV=1	3.957	0.7725	0.001292	65	14	0	111	13	0	48	12	0	35	12	0	28	10	0	29	11	0	36	10	0	23	10	0	23	11	0	33	12	0	20	10	0	28	12	0	35	12	0	19	9	0	24	10	0
KI67_HUMAN	Antigen KI-67 OS=Homo sapiens GN=MKI67 PE=1 SV=2	3.158	0.6674	0.00158	2	2	2	0	0	0	3	3	3	9	9	9	3	3	3	9	8	8	2	2	2	2	2	2	20	18	18	1	1	1	0	0	0	6	6	6	0	0	0	1	1	1	2	2	2
HNRH1_HUMAN	Heterogeneous nuclear ribonucleoprotein H OS=Homo sapiens GN=HNRNPH1 PE=1 SV=4	4.111	0.7623	0.019709	10	6	1	8	6	1	11	8	2	7	5	1	3	3	1	9	7	2	1	1	0	5	4	1	10	7	2	4	3	0	2	2	0	10	7	2	9	6	1	2	2	1	6	5	1
HDGF_HUMAN	Hepatoma-derived growth factor OS=Homo sapiens GN=HDGF PE=1 SV=1	3.335	0.7724	0.006052	6	6	6	2	2	2	8	7	7	6	5	5	6	6	6	6	5	5	5	5	5	6	5	5	6	6	6	5	5	5	5	5	5	4	3	3	6	5	5	6	5	5	6	5	5
K1C20_HUMAN	Keratin, type I cytoskeletal 20 OS=Homo sapiens GN=KRT20 PE=1 SV=1	2.841	0.6512	0.01281	1	1	0	1	1	0	4	2	0	2	1	0	3	1	0	5	2	0	10	1	0	7	1	0	4	1	0	5	1	0	4	1	0	2	1	0	2	1	0	3	1	0	3	1	0
AFF2_HUMAN	AF4/FMR2 family member 2 OS=Homo sapiens GN=AFF2 PE=1 SV=4	1.373	0.228	1.49453	0	0	0	0	0	0	0	0	0	0	0	0	0	0	0	0	0	0	0	0	0	0	0	0	0	0	0	0	0	0	0	0	0	0	0	0	0	0	0	0	0	0	0	0	0
KT222_HUMAN	Keratin-like protein KRT222 OS=Homo sapiens GN=KRT222 PE=2 SV=1	2.541	0.6364	0.01281	1	1	0	1	1	0	2	1	0	2	1	0	3	1	0	3	1	0	10	1	0	7	1	0	4	1	0	5	1	0	4	1	0	2	1	0	2	1	0	3	1	0	3	1	0
PIPNB_HUMAN	Phosphatidylinositol transfer protein beta isoform OS=Homo sapiens GN=PITPNB PE=1 SV=2	1.974	0.6106	0.217725	1	1	1	0	0	0	1	1	0	1	1	1	0	0	0	1	1	0	0	0	0	0	0	0	1	1	0	1	1	1	0	0	0	0	0	0	2	2	2	0	0	0	1	1	1
HV306_HUMAN	Ig heavy chain V-III region BUT OS=Homo sapiens PE=1 SV=1	1.928	0.3422	0.00165	0	0	0	0	0	0	0	0	0	0	0	0	1	1	0	0	0	0	0	0	0	0	0	0	0	0	0	0	0	0	0	0	0	1	1	0	0	0	0	0	0	0	0	0	0
IPO9_HUMAN	Importin-9 OS=Homo sapiens GN=IPO9 PE=1 SV=3	2.699	0.6569	0.015339	2	2	2	1	1	1	2	2	2	2	2	2	0	0	0	2	2	2	1	1	1	1	1	1	2	2	2	1	1	1	1	1	1	2	2	2	3	3	3	1	1	1	2	2	2
G3BP1_HUMAN	Ras GTPase-activating protein-binding protein 1 OS=Homo sapiens GN=G3BP1 PE=1 SV=1	2.634	0.6511	0.025701	2	2	2	0	0	0	4	4	4	0	0	0	0	0	0	2	2	2	0	0	0	1	1	1	1	1	1	0	0	0	1	1	1	1	1	1	0	0	0	0	0	0	0	0	0
ATPD_HUMAN	ATP synthase subunit delta, mitochondrial OS=Homo sapiens GN=ATP5D PE=1 SV=2	3.067	0.5258	0.002656	1	1	1	2	2	2	2	2	2	1	1	1	1	1	1	2	2	2	0	0	0	2	2	2	2	2	2	1	1	1	2	2	2	1	1	1	1	1	1	1	1	1	2	2	2
HDAC2_HUMAN	Histone deacetylase 2 OS=Homo sapiens GN=HDAC2 PE=1 SV=2	2.637	0.7556	0.020275	8	7	4	4	3	1	7	7	4	4	4	2	1	1	0	6	6	2	0	0	0	1	1	1	5	4	1	2	2	1	1	1	1	3	3	1	5	4	1	1	1	0	2	2	1
1433B_HUMAN	14-3-3 protein beta/alpha OS=Homo sapiens GN=YWHAB PE=1 SV=3	3.724	0.6862	0.00137	14	8	3	7	5	2	13	9	4	13	8	3	6	4	2	10	7	3	5	5	2	4	3	2	7	5	3	11	6	2	4	4	3	6	5	3	17	7	3	8	5	3	9	5	3
1C01_HUMAN	HLA class I histocompatibility antigen, Cw-1 alpha chain OS=Homo sapiens GN=HLA-C PE=2 SV=1	1.228	0.2117	1.45318	1	1	0	0	0	0	0	0	0	0	0	0	0	0	0	0	0	0	0	0	0	0	0	0	0	0	0	0	0	0	0	0	0	0	0	0	0	0	0	0	0	0	0	0	0
RL22_HUMAN	60S ribosomal protein L22 OS=Homo sapiens GN=RPL22 PE=1 SV=2	3.122	0.6449	0.002913	4	3	3	2	2	2	3	2	2	3	2	2	3	1	1	4	2	2	1	1	1	4	2	2	3	2	2	4	1	1	2	2	2	2	1	1	3	1	1	1	1	1	2	1	1
WNK1_HUMAN	Serine/threonine-protein kinase WNK1 OS=Homo sapiens GN=WNK1 PE=1 SV=2	2.536	0.7416	0.028259	0	0	0	1	1	1	2	2	2	1	1	1	0	0	0	2	2	2	0	0	0	0	0	0	0	0	0	0	0	0	0	0	0	0	0	0	0	0	0	0	0	0	0	0	0
KLC2_HUMAN	Kinesin light chain 2 OS=Homo sapiens GN=KLC2 PE=1 SV=1	1.872	0.5764	0.193676	0	0	0	0	0	0	0	0	0	0	0	0	0	0	0	1	1	0	0	0	0	0	0	0	1	1	0	0	0	0	0	0	0	0	0	0	1	1	0	1	1	0	0	0	0
IF4A2_HUMAN	Eukaryotic initiation factor 4A-II OS=Homo sapiens GN=EIF4A2 PE=1 SV=2	3.334	0.7591	0.014695	10	7	0	4	4	0	9	8	0	9	7	0	2	2	0	8	7	0	2	2	0	5	4	0	7	7	0	3	3	0	2	2	0	5	5	0	7	6	0	2	2	0	4	4	0
SEPT9_HUMAN	Septin-9 OS=Homo sapiens GN=SEPT9 PE=1 SV=2	2.182	0.6664	0.031206	4	4	4	3	3	3	3	3	3	5	5	5	2	2	2	5	5	5	2	2	2	3	3	3	3	3	3	3	3	3	2	2	2	2	2	2	4	4	4	0	0	0	2	2	2
C11B2_HUMAN	Cytochrome P450 11B2, mitochondrial OS=Homo sapiens GN=CYP11B2 PE=1 SV=3	1.102	0.329	0.05331	1	1	1	0	0	0	0	0	0	0	0	0	0	0	0	1	1	1	0	0	0	0	0	0	0	0	0	1	1	1	0	0	0	0	0	0	1	1	1	0	0	0	1	1	1
KCC2D_HUMAN	Calcium/calmodulin-dependent protein kinase type II subunit delta OS=Homo sapiens GN=CAMK2D PE=1 SV=3	1.597	0.4389	0.629023	1	1	0	0	0	0	0	0	0	0	0	0	0	0	0	0	0	0	0	0	0	0	0	0	0	0	0	0	0	0	0	0	0	0	0	0	0	0	0	0	0	0	0	0	0
LYAM2_HUMAN	E-selectin OS=Homo sapiens GN=SELE PE=1 SV=1	1.154	0.2504	0.026685	0	0	0	0	0	0	0	0	0	0	0	0	0	0	0	0	0	0	0	0	0	0	0	0	0	0	0	0	0	0	0	0	0	0	0	0	0	0	0	0	0	0	0	0	0
LARP1_HUMAN	La-related protein 1 OS=Homo sapiens GN=LARP1 PE=1 SV=2	2.601	0.7377	0.008231	2	2	2	0	0	0	2	2	2	3	3	3	3	3	3	4	4	4	1	1	1	0	0	0	4	4	4	3	3	3	0	0	0	5	5	5	3	3	3	0	0	0	2	2	2
PRPF3_HUMAN	U4/U6 small nuclear ribonucleoprotein Prp3 OS=Homo sapiens GN=PRPF3 PE=1 SV=2	2.167	0.603	0.133883	0	0	0	1	1	1	0	0	0	0	0	0	1	1	1	1	1	1	0	0	0	0	0	0	1	1	1	1	1	1	0	0	0	1	1	1	1	1	1	0	0	0	0	0	0
DJC21_HUMAN	DnaJ homolog subfamily C member 21 OS=Homo sapiens GN=DNAJC21 PE=1 SV=2	1.892	0.75	0.169371	0	0	0	0	0	0	0	0	0	1	1	1	0	0	0	0	0	0	0	0	0	0	0	0	2	2	2	0	0	0	0	0	0	0	0	0	0	0	0	0	0	0	0	0	0
KAP0_HUMAN	cAMP-dependent protein kinase type I-alpha regulatory subunit OS=Homo sapiens GN=PRKAR1A PE=1 SV=1	1.476	0.4953	1.29278	0	0	0	0	0	0	0	0	0	0	0	0	0	0	0	1	1	1	0	0	0	0	0	0	0	0	0	0	0	0	0	0	0	0	0	0	0	0	0	0	0	0	0	0	0
1433Z_HUMAN	14-3-3 protein zeta/delta OS=Homo sapiens GN=YWHAZ PE=1 SV=1	3.688	0.7297	0.012696	13	8	4	8	6	4	9	6	3	11	7	3	6	5	3	9	7	4	5	5	3	5	4	3	6	5	3	12	8	4	4	4	3	6	5	4	15	6	4	8	6	4	7	4	3
KPRB_HUMAN	Phosphoribosyl pyrophosphate synthase-associated protein 2 OS=Homo sapiens GN=PRPSAP2 PE=1 SV=1	1.96	0.5365	0.605489	1	1	0	0	0	0	1	1	0	1	1	1	0	0	0	1	1	1	0	0	0	0	0	0	0	0	0	0	0	0	0	0	0	0	0	0	0	0	0	0	0	0	0	0	0
AAKG1_HUMAN	5'-AMP-activated protein kinase subunit gamma-1 OS=Homo sapiens GN=PRKAG1 PE=1 SV=1	1.076	0.5409	1.17556	1	1	1	0	0	0	0	0	0	0	0	0	0	0	0	0	0	0	0	0	0	0	0	0	0	0	0	0	0	0	0	0	0	0	0	0	0	0	0	0	0	0	0	0	0
AK1C4_HUMAN	Aldo-keto reductase family 1 member C4 OS=Homo sapiens GN=AKR1C4 PE=1 SV=3	2.311	0.5253	0.737438	1	1	0	0	0	0	1	1	0	0	0	0	0	0	0	0	0	0	0	0	0	0	0	0	0	0	0	0	0	0	0	0	0	0	0	0	0	0	0	0	0	0	0	0	0
MAOX_HUMAN	NADP-dependent malic enzyme OS=Homo sapiens GN=ME1 PE=1 SV=1	1.576	0.3921	0.067021	0	0	0	0	0	0	0	0	0	0	0	0	0	0	0	0	0	0	0	0	0	0	0	0	0	0	0	0	0	0	0	0	0	0	0	0	0	0	0	0	0	0	0	0	0
IF6_HUMAN	Eukaryotic translation initiation factor 6 OS=Homo sapiens GN=EIF6 PE=1 SV=1	3.034	0.7208	0.020462	5	4	4	1	1	1	4	4	4	3	3	3	0	0	0	4	3	3	0	0	0	2	2	2	3	3	3	2	2	2	1	1	1	2	2	2	2	2	2	2	2	2	2	2	2
LRSM1_HUMAN	E3 ubiquitin-protein ligase LRSAM1 OS=Homo sapiens GN=LRSAM1 PE=1 SV=1	1.268	0.205	0.892389	0	0	0	0	0	0	0	0	0	0	0	0	0	0	0	0	0	0	0	0	0	0	0	0	0	0	0	0	0	0	0	0	0	0	0	0	1	1	1	0	0	0	0	0	0
ITPR1_HUMAN	Inositol 1,4,5-trisphosphate receptor type 1 OS=Homo sapiens GN=ITPR1 PE=1 SV=2	1.238	0.2011	1.42311	0	0	0	0	0	0	0	0	0	0	0	0	0	0	0	0	0	0	0	0	0	0	0	0	1	1	0	0	0	0	0	0	0	0	0	0	0	0	0	0	0	0	0	0	0
CRBN_HUMAN	Protein cereblon OS=Homo sapiens GN=CRBN PE=1 SV=1	1.61	0.4329	0.33321	1	1	1	1	1	1	0	0	0	0	0	0	0	0	0	0	0	0	0	0	0	0	0	0	0	0	0	0	0	0	0	0	0	0	0	0	0	0	0	0	0	0	0	0	0
PFD2_HUMAN	Prefoldin subunit 2 OS=Homo sapiens GN=PFDN2 PE=1 SV=1	2.804	0.715	0.074773	3	3	3	0	0	0	2	2	2	0	0	0	0	0	0	1	1	1	0	0	0	0	0	0	0	0	0	0	0	0	0	0	0	0	0	0	0	0	0	0	0	0	0	0	0
ATD3A_HUMAN	ATPase family AAA domain-containing protein 3A OS=Homo sapiens GN=ATAD3A PE=1 SV=2	1.228	0.2948	0.770541	0	0	0	0	0	0	0	0	0	0	0	0	0	0	0	1	1	1	0	0	0	0	0	0	0	0	0	0	0	0	0	0	0	0	0	0	0	0	0	0	0	0	0	0	0
HNRH2_HUMAN	Heterogeneous nuclear ribonucleoprotein H2 OS=Homo sapiens GN=HNRNPH2 PE=1 SV=1	4.111	0.7623	0.024638	9	5	0	7	5	0	8	5	0	6	4	0	2	2	0	8	6	1	1	1	0	5	4	1	9	6	1	4	3	0	2	2	0	8	5	0	8	5	0	1	1	0	5	4	0
HYOU1_HUMAN	Hypoxia up-regulated protein 1 OS=Homo sapiens GN=HYOU1 PE=1 SV=1	2.403	0.7543	0.019302	2	2	2	1	1	1	2	2	2	5	5	5	0	0	0	5	5	5	1	1	1	0	0	0	4	4	4	1	1	1	1	1	1	1	1	1	1	1	1	0	0	0	1	1	1
UBC12_HUMAN	NEDD8-conjugating enzyme Ubc12 OS=Homo sapiens GN=UBE2M PE=1 SV=1	2.459	0.6436	0.020655	4	4	4	1	1	1	2	2	2	2	2	2	0	0	0	3	3	3	1	1	1	2	2	2	3	3	3	1	1	1	1	1	1	0	0	0	2	2	2	2	2	2	1	1	1
DRG1_HUMAN	Developmentally-regulated GTP-binding protein 1 OS=Homo sapiens GN=DRG1 PE=1 SV=1	1.474	0.4957	0.42377	0	0	0	0	0	0	1	1	1	1	1	1	0	0	0	0	0	0	0	0	0	0	0	0	0	0	0	0	0	0	0	0	0	0	0	0	1	1	1	0	0	0	0	0	0
DCD_HUMAN	Dermcidin OS=Homo sapiens GN=DCD PE=1 SV=2	2.476	0.617	0.004838	2	2	2	1	1	1	2	2	2	2	2	2	2	2	2	0	0	0	1	1	1	1	1	1	1	1	1	1	1	1	2	2	2	2	2	2	2	2	2	2	2	2	1	1	1
UBR4_HUMAN	E3 ubiquitin-protein ligase UBR4 OS=Homo sapiens GN=UBR4 PE=1 SV=1	3.131	0.6182	0.0725	10	10	10	5	5	5	7	7	7	1	1	1	0	0	0	0	0	0	0	0	0	0	0	0	1	1	1	1	1	1	0	0	0	1	1	1	1	1	1	0	0	0	1	1	1
ZN326_HUMAN	DBIRD complex subunit ZNF326 OS=Homo sapiens GN=ZNF326 PE=1 SV=2	2.18	0.6389	0.127503	1	1	1	0	0	0	1	1	1	2	2	2	0	0	0	3	3	3	0	0	0	0	0	0	5	5	5	2	2	2	0	0	0	4	4	4	1	1	1	0	0	0	0	0	0
WDR5_HUMAN	WD repeat-containing protein 5 OS=Homo sapiens GN=WDR5 PE=1 SV=1	2.677	0.6362	0.216393	2	2	2	0	0	0	1	1	1	1	1	1	0	0	0	3	3	3	0	0	0	0	0	0	0	0	0	0	0	0	0	0	0	0	0	0	0	0	0	0	0	0	0	0	0
ANFY1_HUMAN	Ankyrin repeat and FYVE domain-containing protein 1 OS=Homo sapiens GN=ANKFY1 PE=1 SV=2	2.167	0.5459	0.494648	1	1	1	0	0	0	0	0	0	1	1	1	1	1	1	0	0	0	0	0	0	0	0	0	0	0	0	0	0	0	0	0	0	0	0	0	1	1	1	0	0	0	0	0	0
AN32E_HUMAN	Acidic leucine-rich nuclear phosphoprotein 32 family member E OS=Homo sapiens GN=ANP32E PE=1 SV=1	2.324	0.6434	0.231168	0	0	0	0	0	0	1	1	1	0	0	0	1	1	1	1	1	1	0	0	0	0	0	0	2	2	2	1	1	1	0	0	0	1	1	1	2	2	2	1	1	1	0	0	0
NELFB_HUMAN	Negative elongation factor B OS=Homo sapiens GN=COBRA1 PE=1 SV=1	2.436	0.5731	0.04556	2	2	2	0	0	0	1	1	1	1	1	1	0	0	0	0	0	0	0	0	0	0	0	0	0	0	0	0	0	0	0	0	0	0	0	0	2	2	2	0	0	0	0	0	0
IQGA3_HUMAN	Ras GTPase-activating-like protein IQGAP3 OS=Homo sapiens GN=IQGAP3 PE=1 SV=2	1.687	0.3374	0.341425	0	0	0	0	0	0	0	0	0	1	1	0	0	0	0	1	1	0	0	0	0	1	1	0	1	1	0	0	0	0	0	0	0	1	1	0	1	1	0	1	1	0	1	1	0
RS19_HUMAN	40S ribosomal protein S19 OS=Homo sapiens GN=RPS19 PE=1 SV=2	2.617	0.6162	0.000579	8	8	8	6	6	6	10	10	10	9	8	8	8	7	7	11	10	10	5	4	4	6	5	5	7	6	6	8	7	7	6	6	6	8	7	7	9	8	8	6	5	5	5	4	4
TFR2_HUMAN	Transferrin receptor protein 2 OS=Homo sapiens GN=TFR2 PE=1 SV=1	1.386	0.3672	0.496753	1	1	0	0	0	0	0	0	0	0	0	0	0	0	0	1	1	0	0	0	0	0	0	0	0	0	0	0	0	0	0	0	0	1	1	0	0	0	0	0	0	0	0	0	0
ICAL_HUMAN	Calpastatin OS=Homo sapiens GN=CAST PE=1 SV=4	1.958	0.5021	0.119447	1	1	1	1	1	1	4	4	4	1	1	1	0	0	0	3	3	3	1	1	1	0	0	0	4	4	4	1	1	1	0	0	0	4	4	4	4	4	4	1	1	1	1	1	1
PHF6_HUMAN	PHD finger protein 6 OS=Homo sapiens GN=PHF6 PE=1 SV=1	2.453	0.6857	0.152879	0	0	0	0	0	0	0	0	0	1	1	1	0	0	0	1	1	1	0	0	0	0	0	0	2	2	2	0	0	0	0	0	0	2	2	2	1	1	1	0	0	0	0	0	0
RBM42_HUMAN	RNA-binding protein 42 OS=Homo sapiens GN=RBM42 PE=1 SV=1	1.065	0.3587	0.565129	0	0	0	0	0	0	0	0	0	0	0	0	0	0	0	0	0	0	0	0	0	0	0	0	1	1	1	0	0	0	0	0	0	0	0	0	0	0	0	0	0	0	0	0	0
OSB10_HUMAN	Oxysterol-binding protein-related protein 10 OS=Homo sapiens GN=OSBPL10 PE=1 SV=2	2.623	0.6069	0.23257	0	0	0	0	0	0	0	0	0	0	0	0	1	1	1	0	0	0	0	0	0	0	0	0	0	0	0	1	1	1	0	0	0	0	0	0	0	0	0	0	0	0	0	0	0
RS7_HUMAN	40S ribosomal protein S7 OS=Homo sapiens GN=RPS7 PE=1 SV=1	2.398	0.6042	0.025008	4	4	4	3	2	2	3	3	3	3	2	2	4	3	3	3	3	3	3	2	2	3	2	2	4	3	3	4	2	2	2	1	1	3	2	2	6	4	4	1	1	1	3	2	2
IGSF8_HUMAN	Immunoglobulin superfamily member 8 OS=Homo sapiens GN=IGSF8 PE=1 SV=1	1.232	0.2021	1.15107	0	0	0	0	0	0	0	0	0	0	0	0	0	0	0	0	0	0	0	0	0	0	0	0	0	0	0	0	0	0	0	0	0	0	0	0	0	0	0	0	0	0	0	0	0
CC168_HUMAN	Coiled-coil domain-containing protein 168 OS=Homo sapiens GN=CCDC168 PE=2 SV=2	1.139	0.1475	0.644805	0	0	0	0	0	0	0	0	0	0	0	0	0	0	0	0	0	0	0	0	0	0	0	0	0	0	0	0	0	0	0	0	0	0	0	0	0	0	0	0	0	0	0	0	0
CALR_HUMAN	Calreticulin OS=Homo sapiens GN=CALR PE=1 SV=1	3.489	0.7542	0.004759	14	12	12	7	6	6	13	11	11	12	9	9	8	6	6	15	12	12	6	5	5	8	7	7	12	10	10	10	8	8	4	4	4	10	9	9	12	9	9	8	8	8	9	8	8
AT1B1_HUMAN	Sodium/potassium-transporting ATPase subunit beta-1 OS=Homo sapiens GN=ATP1B1 PE=1 SV=1	1.226	0.1721	0.97827	0	0	0	0	0	0	0	0	0	0	0	0	0	0	0	0	0	0	0	0	0	0	0	0	0	0	0	0	0	0	0	0	0	0	0	0	1	1	1	0	0	0	0	0	0
[truncated: 334 more rows]
[truncated: 37 more columns]
